# Supplementary material
Source: publisher site journal article supplement (https://www.dovepress.com/article/351990)
Supplement: Supplementary file 1 [file get_supplementary_file.php]

## Supplementary Figures

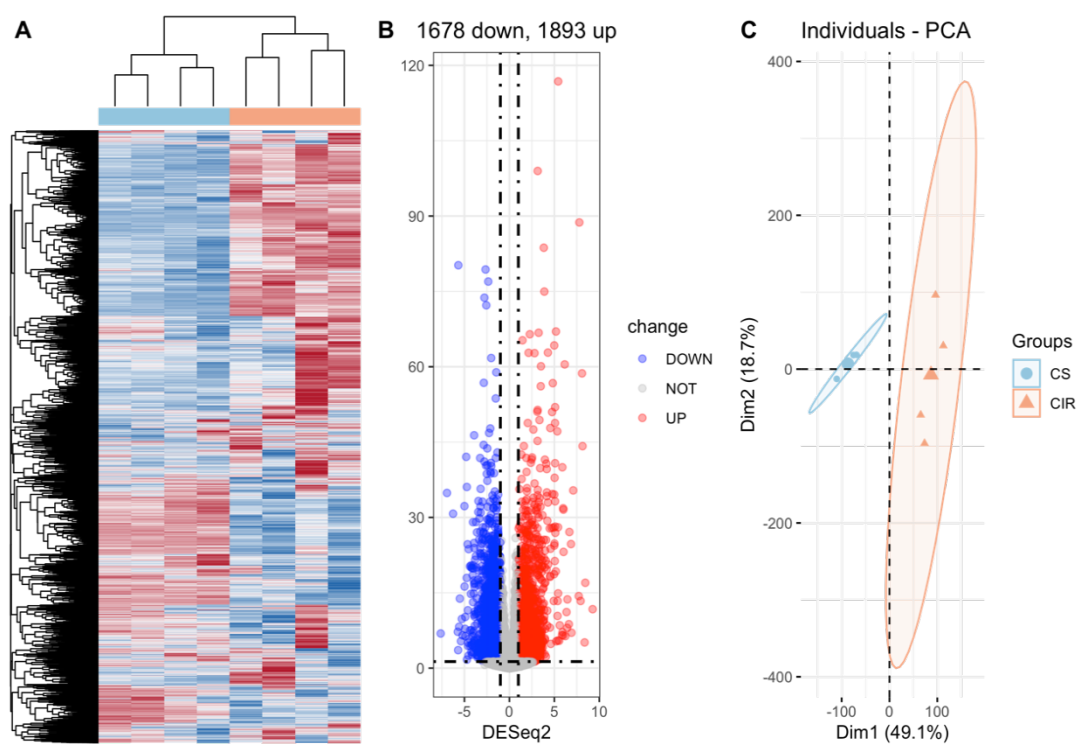

**Figure S1** PCA plot(A), Heatmap (B) and Volcano plot(C) of 3571 mouse DEGs. In the volcano plots of DEGs, the horizontal axis represents the  $\log_2$  fold change (CIR versus CS), the vertical axis represents the  $-\log_{10}(p\text{-value})$  of DEGs. Colors represent different genes: Grey nodes represent genes without significantly different expression, red nodes represent up-regulated genes, and blue nodes represent down-regulated genes.

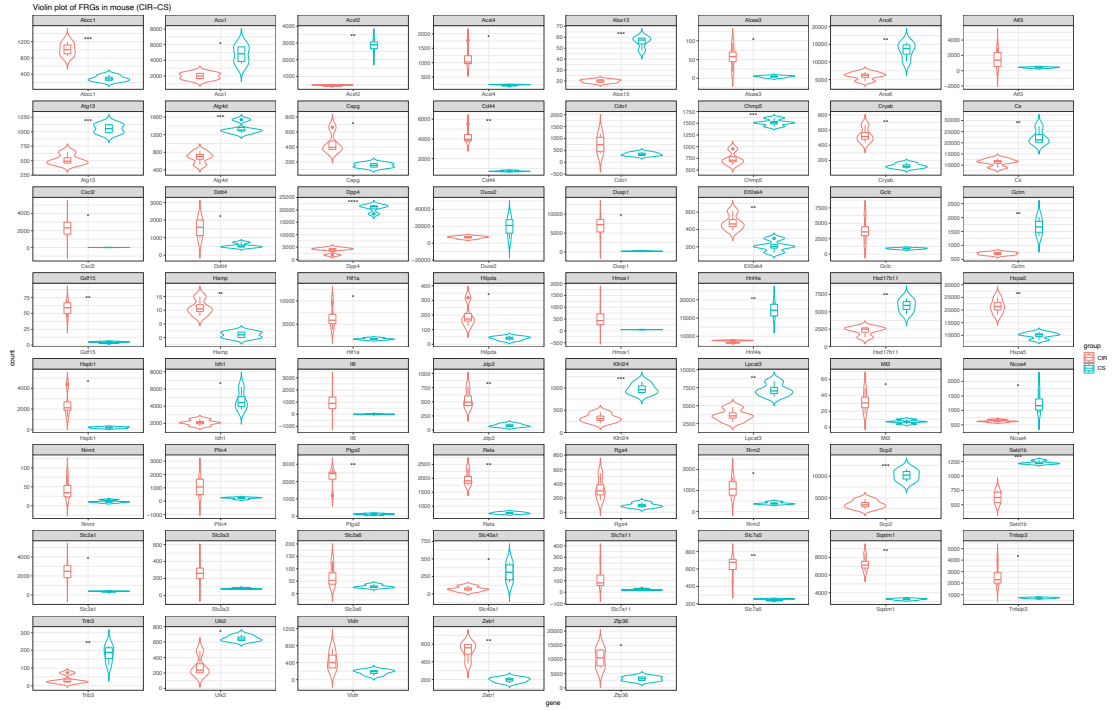

**Figure S2 The violin plot of the FRGs between mouse intestinal I/R samples (CIR) and Sham samples (CS). Student's t-tests were utilized for the analysis between two groups (\*p<0.05, \*\*p<0.01, \*\*\*p<0.001, \*\*\*\*p<0.0001).**

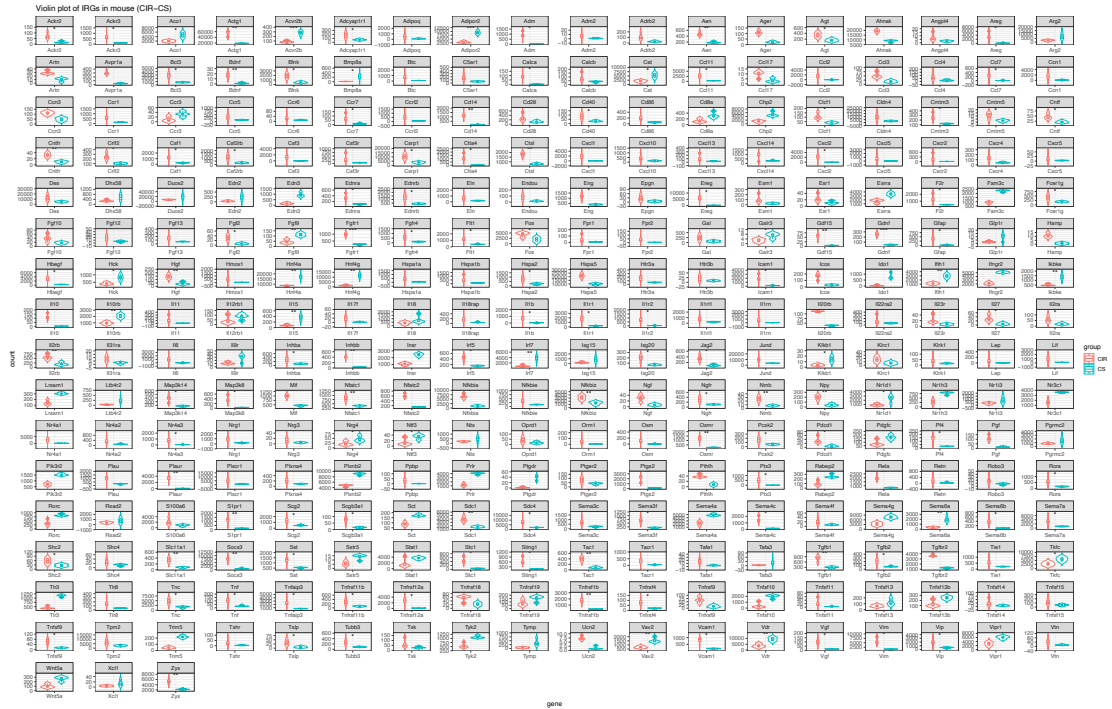

**Figure S3** The violin plot of the IRGs between mouse intestinal I/R samples (CIR) and Sham samples (CS). Student's t-tests were utilized for the analysis between two groups (\* $p < 0.05$ , \*\* $p < 0.01$ , \*\*\* $p < 0.001$ , \*\*\*\* $p < 0.0001$ ).

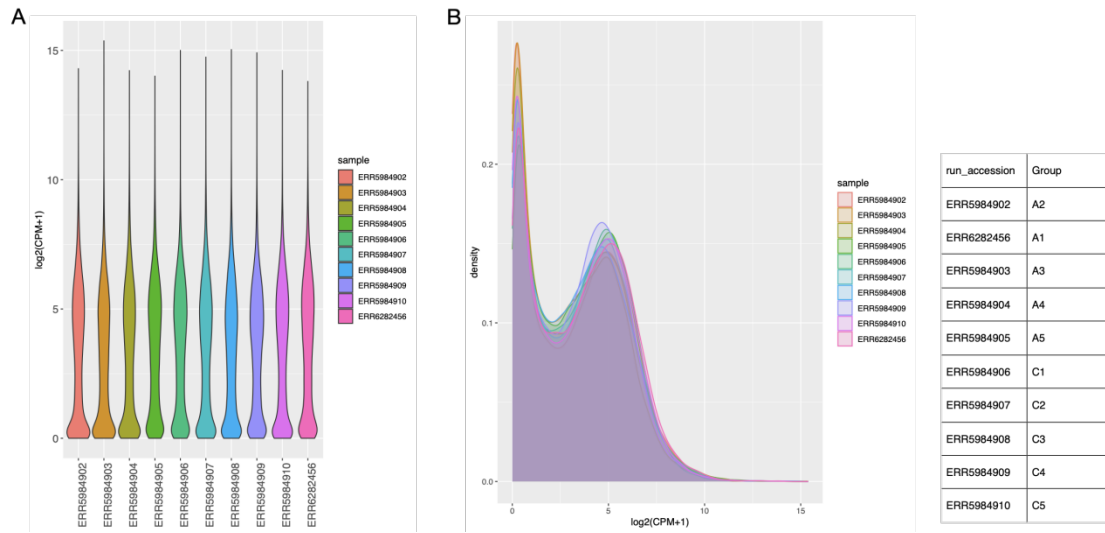

**Figure S4** Violin plot (A) and density plot (B) of human samples datasets.

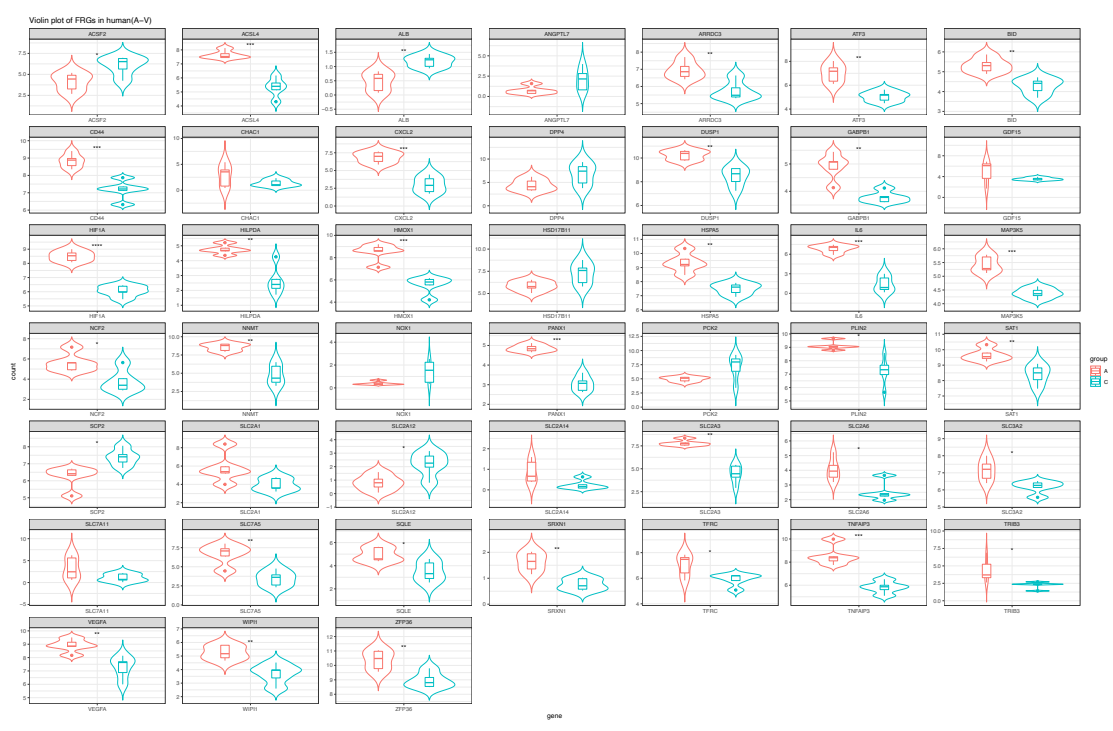

**Figure S5 The violin plot of the FRGs between human intestinal I/R samples (A) and control samples(C). Student's t-tests were utilized for the analysis between two groups (\*p<0.05, \*\*p<0.01, \*\*\*p<0.001, \*\*\*\*p<0.0001).**

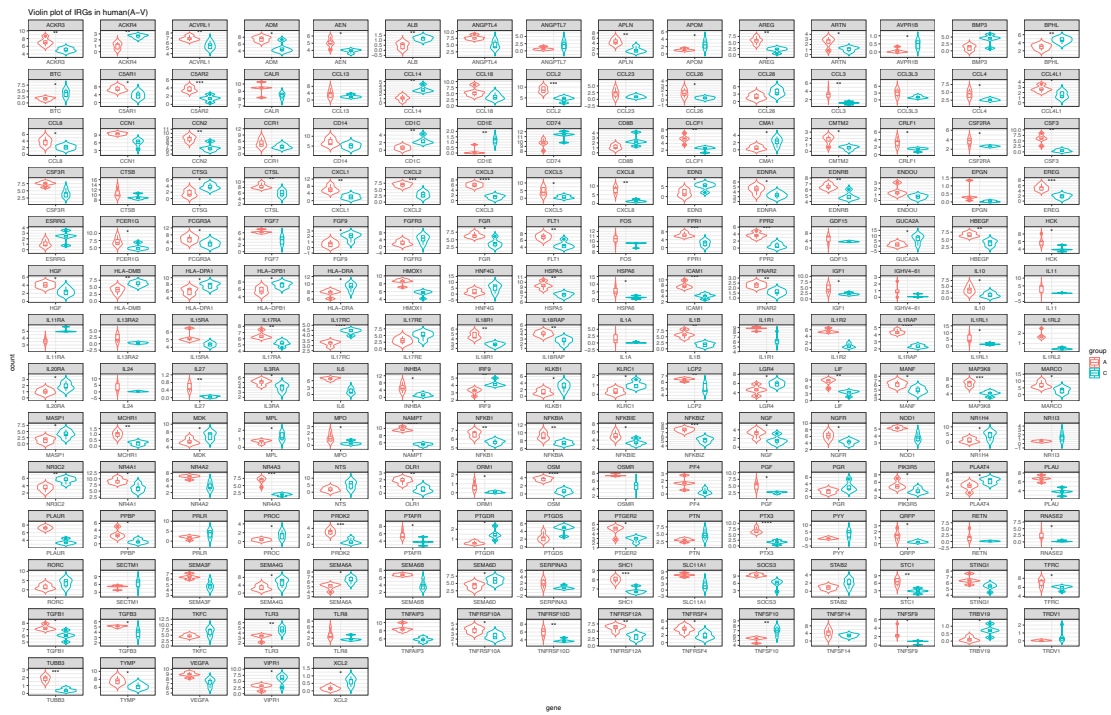

**Figure S6 The violin plot of the FRGs between human intestinal I/R samples (A) and control samples(C). Student's t-tests were utilized for the analysis between two groups (\*p<0.05, \*\*p<0.01, \*\*\*p<0.001, \*\*\*\*p<0.0001).**

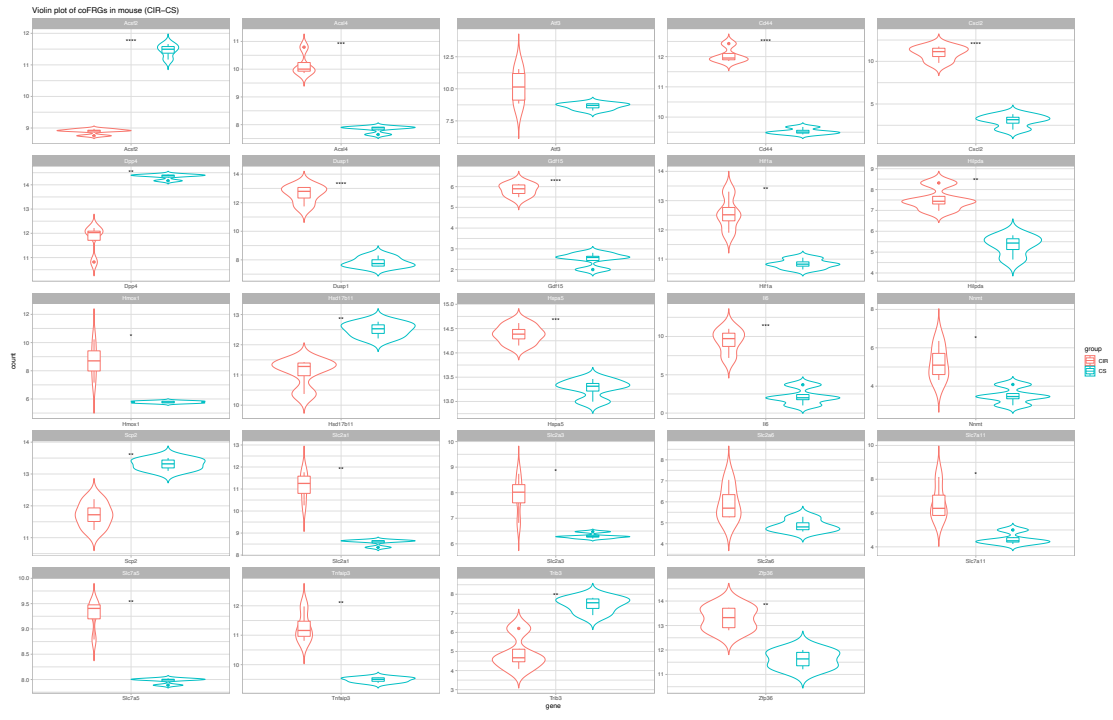

**Figure S7** The violin plot of the coFRGs between mouse intestinal I/R samples (CIR) and Sham samples (CS). Student's t-tests were utilized for the analysis between two groups (\* $p < 0.05$ , \*\* $p < 0.01$ , \*\*\* $p < 0.001$ , \*\*\*\* $p < 0.0001$ ).

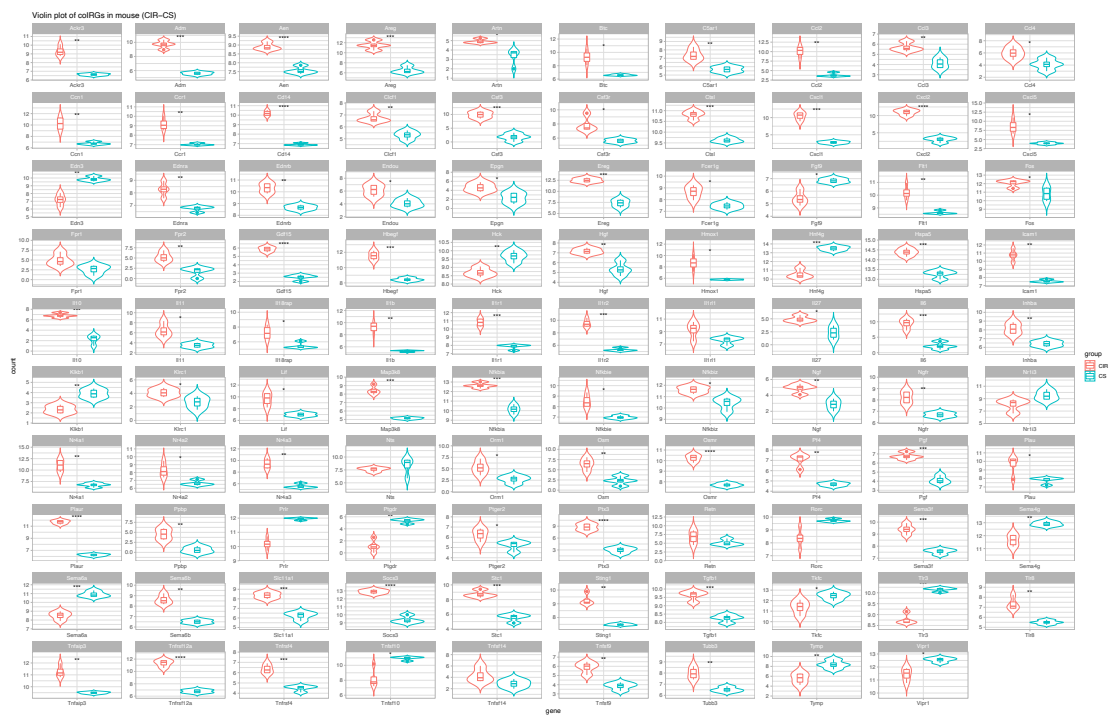

**Figure S8** The violin plot of the coIRGs between mouse intestinal I/R samples (CIR) and Sham samples (CS). Student's t-tests were utilized for the analysis between two groups (\* $p < 0.05$ , \*\* $p < 0.01$ , \*\*\* $p < 0.001$ , \*\*\*\* $p < 0.0001$ ).

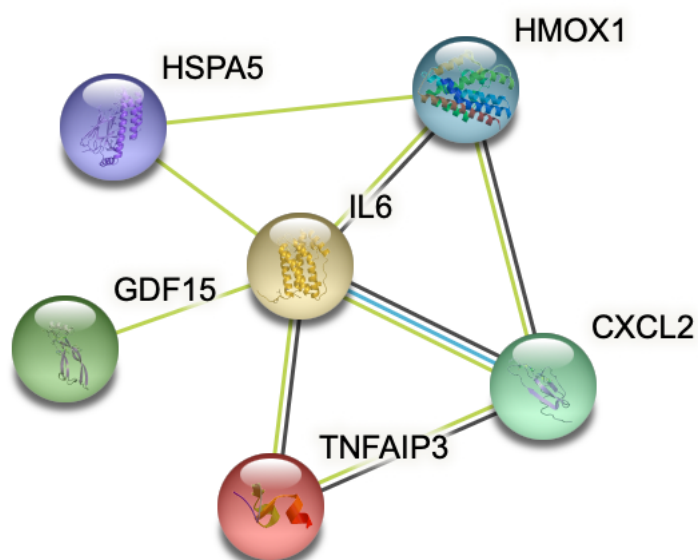

**Figure S9** The Protein-protein interaction of the 6 hub genes (STRING).

## Supplementary Tables

**Table S1** 3571 DEGs obtained from the 4 mice intestinal I/R injury samples and 4 sham samples

|        | baseMean   | log2FoldChange | lfcSE  | stat    | pvalue | padj   | change |
|--------|------------|----------------|--------|---------|--------|--------|--------|
| Cd8a   | 227.5969   | -1.4471        | 0.3390 | -4.2683 | 0.0000 | 0.0001 | DOWN   |
| Ctsl   | 1290.2801  | 1.1249         | 0.1465 | 7.6769  | 0.0000 | 0.0000 | UP     |
| Fcer1g | 295.2864   | 1.1507         | 0.2747 | 4.1890  | 0.0000 | 0.0001 | UP     |
| Hspa1a | 249.8522   | 3.0017         | 0.5136 | 5.8444  | 0.0000 | 0.0000 | UP     |
| Hspa1b | 315.4612   | 2.7424         | 0.5231 | 5.2427  | 0.0000 | 0.0000 | UP     |
| Hspa2  | 528.0201   | 1.8699         | 0.3681 | 5.0796  | 0.0000 | 0.0000 | UP     |
| Hspa5  | 15590.4584 | 1.0396         | 0.1319 | 7.8797  | 0.0000 | 0.0000 | UP     |
| Orm1   | 29.9014    | 3.0789         | 0.7494 | 4.1083  | 0.0000 | 0.0002 | UP     |
| Tnf    | 62.0875    | 1.8857         | 0.3764 | 5.0093  | 0.0000 | 0.0000 | UP     |
| Aen    | 334.2983   | 1.2905         | 0.1824 | 7.0758  | 0.0000 | 0.0000 | UP     |

|         |            |         |        |          |        |        |      |
|---------|------------|---------|--------|----------|--------|--------|------|
| Isg20   | 127.7586   | 1.3356  | 0.2722 | 4.9059   | 0.0000 | 0.0000 | UP   |
| Bcl3    | 1794.9644  | 1.7614  | 0.2588 | 6.8057   | 0.0000 | 0.0000 | UP   |
| Duox2   | 12897.4764 | -1.4778 | 0.4445 | -3.3248  | 0.0009 | 0.0028 | DOWN |
| Tlr3    | 799.7092   | -1.4546 | 0.1214 | -11.9811 | 0.0000 | 0.0000 | DOWN |
| Ifih1   | 2092.9377  | -1.4353 | 0.1990 | -7.2124  | 0.0000 | 0.0000 | DOWN |
| Trim5   | 134.8520   | -2.2982 | 0.2166 | -10.6115 | 0.0000 | 0.0000 | DOWN |
| Ido1    | 427.1897   | -4.2875 | 0.5384 | -7.9631  | 0.0000 | 0.0000 | DOWN |
| Gdf15   | 30.7772    | 3.5349  | 0.4410 | 8.0148   | 0.0000 | 0.0000 | UP   |
| Adipoq  | 316.6370   | 2.2755  | 0.8419 | 2.7027   | 0.0069 | 0.0169 | UP   |
| Stat1   | 2772.7339  | -1.1007 | 0.4070 | -2.7043  | 0.0068 | 0.0168 | DOWN |
| Socs3   | 4125.9661  | 3.4227  | 0.2568 | 13.3304  | 0.0000 | 0.0000 | UP   |
| Tnfsf10 | 1226.0547  | -2.3448 | 0.5273 | -4.4469  | 0.0000 | 0.0000 | DOWN |
| Il15    | 230.5672   | -2.1466 | 0.2655 | -8.0847  | 0.0000 | 0.0000 | DOWN |
| Cd40    | 55.7655    | 1.3622  | 0.3393 | 4.0152   | 0.0001 | 0.0002 | UP   |
| Zyx     | 3782.3772  | 1.2005  | 0.1989 | 6.0354   | 0.0000 | 0.0000 | UP   |
| Ikbke   | 946.8417   | -1.4938 | 0.1602 | -9.3267  | 0.0000 | 0.0000 | DOWN |
| Isg15   | 570.8959   | -2.0794 | 0.5153 | -4.0356  | 0.0001 | 0.0002 | DOWN |
| Dhx58   | 429.2746   | -1.0568 | 0.3209 | -3.2928  | 0.0010 | 0.0031 | DOWN |
| Tnfaip3 | 1622.8784  | 1.7687  | 0.2201 | 8.0374   | 0.0000 | 0.0000 | UP   |
| F2r     | 912.8571   | 1.3448  | 0.2131 | 6.3095   | 0.0000 | 0.0000 | UP   |
| Eln     | 408.9123   | 1.6781  | 0.4354 | 3.8541   | 0.0001 | 0.0004 | UP   |
| Il27    | 18.2204    | 2.4422  | 0.6700 | 3.6449   | 0.0003 | 0.0009 | UP   |
| Lep     | 44.0533    | 6.4205  | 1.1195 | 5.7350   | 0.0000 | 0.0000 | UP   |
| Klkb1   | 9.6089     | -1.8424 | 0.5788 | -3.1833  | 0.0015 | 0.0043 | DOWN |
| Csrp1   | 6886.7479  | 1.5611  | 0.2602 | 5.9999   | 0.0000 | 0.0000 | UP   |
| Irf5    | 294.2020   | 1.4688  | 0.1865 | 7.8771   | 0.0000 | 0.0000 | UP   |
| Ccr6    | 19.3927    | 1.3442  | 0.6079 | 2.2113   | 0.0270 | 0.0551 | UP   |
| Tlr8    | 108.2786   | 1.8988  | 0.3562 | 5.3315   | 0.0000 | 0.0000 | UP   |
| Wnt5a   | 185.7663   | -1.4883 | 0.2747 | -5.4176  | 0.0000 | 0.0000 | DOWN |
| Tyk2    | 825.3344   | -1.0464 | 0.1512 | -6.9223  | 0.0000 | 0.0000 | DOWN |
| Tpm2    | 4704.9575  | 1.1781  | 0.3252 | 3.6222   | 0.0003 | 0.0010 | UP   |
| Ahnak   | 13851.4570 | 1.0742  | 0.1344 | 7.9921   | 0.0000 | 0.0000 | UP   |
| Fgf2    | 19.2054    | 2.1298  | 0.4987 | 4.2707   | 0.0000 | 0.0001 | UP   |
| Tkfc    | 4367.0719  | -1.0821 | 0.3361 | -3.2196  | 0.0013 | 0.0039 | DOWN |
| Nfkbiz  | 2298.6601  | 1.0427  | 0.2926 | 3.5635   | 0.0004 | 0.0013 | UP   |
| Robo3   | 12.6593    | 1.2541  | 0.6031 | 2.0796   | 0.0376 | 0.0734 | UP   |
| Slc11a1 | 203.6359   | 2.0600  | 0.2638 | 7.8087   | 0.0000 | 0.0000 | UP   |
| Sting1  | 407.4664   | 1.7812  | 0.2500 | 7.1242   | 0.0000 | 0.0000 | UP   |
| Des     | 8465.1672  | 1.2615  | 0.3116 | 4.0485   | 0.0001 | 0.0002 | UP   |
| Ccl4    | 45.3456    | 1.8442  | 0.5730 | 3.2186   | 0.0013 | 0.0039 | UP   |

|          |            |         |        |         |        |        |      |
|----------|------------|---------|--------|---------|--------|--------|------|
| Tnfrsf11 | 12.5704    | 2.5994  | 0.7400 | 3.5126  | 0.0004 | 0.0015 | UP   |
| Klrl1    | 29.5223    | 1.4086  | 0.4632 | 3.0412  | 0.0024 | 0.0066 | UP   |
| Jund     | 6721.6621  | 1.4547  | 0.3706 | 3.9250  | 0.0001 | 0.0003 | UP   |
| Cldn4    | 6187.9170  | 1.7802  | 0.3692 | 4.8221  | 0.0000 | 0.0000 | UP   |
| Irf7     | 2415.3203  | -2.0771 | 0.2606 | -7.9691 | 0.0000 | 0.0000 | DOWN |
| Ii18     | 649.7685   | -1.2620 | 0.5021 | -2.5134 | 0.0120 | 0.0273 | DOWN |
| Rela     | 1358.0706  | 1.3273  | 0.1449 | 9.1622  | 0.0000 | 0.0000 | UP   |
| Ptx3     | 250.2602   | 6.0073  | 0.5079 | 11.8274 | 0.0000 | 0.0000 | UP   |
| Ptgs2    | 1136.5882  | 4.1587  | 0.3127 | 13.2998 | 0.0000 | 0.0000 | UP   |
| Cd14     | 644.1302   | 3.2562  | 0.1876 | 17.3580 | 0.0000 | 0.0000 | UP   |
| Hmox1    | 305.1982   | 3.3243  | 0.5391 | 6.1665  | 0.0000 | 0.0000 | UP   |
| Hgf      | 93.0960    | 1.6682  | 0.3481 | 4.7919  | 0.0000 | 0.0000 | UP   |
| Plscr1   | 3054.1144  | 2.5734  | 0.4675 | 5.5051  | 0.0000 | 0.0000 | UP   |
| Rsad2    | 587.1257   | -1.0783 | 0.5172 | -2.0851 | 0.0371 | 0.0725 | DOWN |
| Pdcd1    | 21.1244    | 2.4063  | 0.5568 | 4.3215  | 0.0000 | 0.0001 | UP   |
| Pcsk2    | 108.1203   | 1.5483  | 0.3273 | 4.7303  | 0.0000 | 0.0000 | UP   |
| Arg2     | 4990.1736  | -1.8455 | 0.4158 | -4.4381 | 0.0000 | 0.0000 | DOWN |
| Vtn      | 27.4525    | 1.3735  | 0.4883 | 2.8128  | 0.0049 | 0.0125 | UP   |
| Vim      | 3442.4428  | 1.9946  | 0.1899 | 10.5063 | 0.0000 | 0.0000 | UP   |
| Vcam1    | 468.6553   | 2.1333  | 0.2912 | 7.3251  | 0.0000 | 0.0000 | UP   |
| Gfap     | 205.5190   | 4.9939  | 0.4028 | 12.3966 | 0.0000 | 0.0000 | UP   |
| Ager     | 65.0550    | 2.1622  | 0.2832 | 7.6359  | 0.0000 | 0.0000 | UP   |
| Actg1    | 37525.2261 | 1.5157  | 0.1884 | 8.0452  | 0.0000 | 0.0000 | UP   |
| Aco1     | 3419.0380  | -1.3362 | 0.2270 | -5.8872 | 0.0000 | 0.0000 | DOWN |
| Ccl17    | 6.5598     | 1.5491  | 0.6772 | 2.2875  | 0.0222 | 0.0466 | UP   |
| Ccr3     | 21.4437    | -1.8672 | 0.7368 | -2.5341 | 0.0113 | 0.0259 | DOWN |
| Ackr2    | 43.5586    | 1.9654  | 0.3828 | 5.1346  | 0.0000 | 0.0000 | UP   |
| Ccr7     | 40.6873    | 2.9575  | 0.4896 | 6.0404  | 0.0000 | 0.0000 | UP   |
| Ccr8     | 13.2033    | 3.2619  | 0.9892 | 3.2975  | 0.0010 | 0.0030 | UP   |
| Ccl2     | 727.9533   | 6.6747  | 0.6105 | 10.9336 | 0.0000 | 0.0000 | UP   |
| Ccl7     | 124.3371   | 5.3646  | 0.7103 | 7.5526  | 0.0000 | 0.0000 | UP   |
| Ccl3     | 34.1382    | 1.5163  | 0.3601 | 4.2111  | 0.0000 | 0.0001 | UP   |
| Ccl11    | 1471.8159  | 2.9882  | 0.3715 | 8.0430  | 0.0000 | 0.0000 | UP   |
| Ccr5     | 227.3287   | 1.3817  | 0.3723 | 3.7108  | 0.0002 | 0.0008 | UP   |
| Xcl1     | 10.0805    | -1.8660 | 0.7105 | -2.6261 | 0.0086 | 0.0206 | DOWN |
| Ccr1     | 371.1873   | 2.1960  | 0.3301 | 6.6523  | 0.0000 | 0.0000 | UP   |
| Cxcl1    | 867.7628   | 8.1380  | 0.5787 | 14.0631 | 0.0000 | 0.0000 | UP   |
| Cxcl10   | 301.3703   | 1.5189  | 0.5191 | 2.9261  | 0.0034 | 0.0091 | UP   |
| Cxcr4    | 91.3036    | 1.5546  | 0.3380 | 4.6000  | 0.0000 | 0.0000 | UP   |
| Cxcl2    | 1109.5094  | 8.0792  | 0.4970 | 16.2544 | 0.0000 | 0.0000 | UP   |



|        |           |         |        |         |        |        |      |
|--------|-----------|---------|--------|---------|--------|--------|------|
| Tafa3  | 15.3327   | -2.8670 | 0.7634 | -3.7554 | 0.0002 | 0.0006 | DOWN |
| Tafa1  | 10.6106   | 2.0544  | 0.6214 | 3.3060  | 0.0009 | 0.0029 | UP   |
| Il6    | 501.4205  | 7.7089  | 0.9835 | 7.8384  | 0.0000 | 0.0000 | UP   |
| Il1b   | 351.6263  | 4.0513  | 0.4190 | 9.6682  | 0.0000 | 0.0000 | UP   |
| Il13   | 3.5445    | -3.0863 | 1.2798 | -2.4116 | 0.0159 | 0.0348 | DOWN |
| Il10   | 57.4555   | 4.5759  | 0.4480 | 10.2137 | 0.0000 | 0.0000 | UP   |
| Mif    | 724.1155  | 1.0941  | 0.1446 | 7.5673  | 0.0000 | 0.0000 | UP   |
| Ptgdr  | 21.4964   | -4.6161 | 0.6616 | -6.9771 | 0.0000 | 0.0000 | DOWN |
| Cd86   | 130.0022  | 1.8288  | 0.3392 | 5.3921  | 0.0000 | 0.0000 | UP   |
| Hck    | 630.0341  | -1.0380 | 0.2352 | -4.4140 | 0.0000 | 0.0000 | DOWN |
| Vdr    | 6650.4872 | -1.4275 | 0.2697 | -5.2933 | 0.0000 | 0.0000 | DOWN |
| Txk    | 45.5208   | 1.0923  | 0.4407 | 2.4786  | 0.0132 | 0.0297 | UP   |
| Blnk   | 1192.6916 | 1.9232  | 0.3304 | 5.8203  | 0.0000 | 0.0000 | UP   |
| Vav2   | 1157.7942 | -1.1699 | 0.1885 | -6.2064 | 0.0000 | 0.0000 | DOWN |
| Chp2   | 3212.4309 | -2.1076 | 0.3611 | -5.8369 | 0.0000 | 0.0000 | DOWN |
| Nfatc1 | 593.3243  | 1.1259  | 0.1548 | 7.2743  | 0.0000 | 0.0000 | UP   |
| Nfatc2 | 367.2020  | 2.0003  | 0.1815 | 11.0196 | 0.0000 | 0.0000 | UP   |
| Cxcl13 | 65.4217   | 1.8257  | 0.5461 | 3.3433  | 0.0008 | 0.0026 | UP   |
| Cxcl14 | 591.8227  | 1.5033  | 0.4364 | 3.4449  | 0.0006 | 0.0019 | UP   |
| Cxcl3  | 38.2962   | 6.6168  | 1.1001 | 6.0146  | 0.0000 | 0.0000 | UP   |
| Cxcl5  | 373.1196  | 5.5953  | 0.9431 | 5.9328  | 0.0000 | 0.0000 | UP   |
| Ccn1   | 792.7650  | 3.7261  | 0.4527 | 8.2308  | 0.0000 | 0.0000 | UP   |
| Edn2   | 141.1783  | -2.7715 | 0.5804 | -4.7748 | 0.0000 | 0.0000 | DOWN |
| Edn3   | 557.3270  | -2.6418 | 0.3187 | -8.2891 | 0.0000 | 0.0000 | DOWN |
| Fgf10  | 28.3103   | 1.1197  | 0.4036 | 2.7738  | 0.0055 | 0.0139 | UP   |
| Pf4    | 81.0669   | 2.4464  | 0.3389 | 7.2183  | 0.0000 | 0.0000 | UP   |
| Plau   | 568.1669  | 1.9690  | 0.4330 | 4.5470  | 0.0000 | 0.0000 | UP   |
| Ppbp   | 16.6601   | 5.3876  | 1.1547 | 4.6658  | 0.0000 | 0.0000 | UP   |
| Sema3c | 511.3114  | 1.6340  | 0.3519 | 4.6428  | 0.0000 | 0.0000 | UP   |
| Sema3f | 435.3304  | 1.8007  | 0.2145 | 8.3964  | 0.0000 | 0.0000 | UP   |
| Sema4a | 3613.2810 | -1.1522 | 0.2104 | -5.4760 | 0.0000 | 0.0000 | DOWN |
| Sema4c | 792.2646  | 3.1488  | 0.2700 | 11.6606 | 0.0000 | 0.0000 | UP   |
| Sema4f | 14.3754   | 1.3822  | 0.5401 | 2.5594  | 0.0105 | 0.0243 | UP   |
| Sema4g | 5591.5803 | -1.3154 | 0.2156 | -6.0995 | 0.0000 | 0.0000 | DOWN |
| Sema6a | 1200.4562 | -2.4929 | 0.2545 | -9.7958 | 0.0000 | 0.0000 | DOWN |
| Sema6b | 246.9383  | 2.0985  | 0.2855 | 7.3499  | 0.0000 | 0.0000 | UP   |
| Sema7a | 2107.6893 | 2.0205  | 0.3569 | 5.6612  | 0.0000 | 0.0000 | UP   |
| Tnc    | 3189.5424 | 1.4892  | 0.2965 | 5.0225  | 0.0000 | 0.0000 | UP   |
| Tymp   | 221.5310  | -2.8505 | 0.5345 | -5.3329 | 0.0000 | 0.0000 | DOWN |
| C5ar1  | 117.0653  | 1.7913  | 0.3793 | 4.7231  | 0.0000 | 0.0000 | UP   |

|        |           |         |        |          |        |        |      |
|--------|-----------|---------|--------|----------|--------|--------|------|
| Ccr12  | 300.0464  | 2.8836  | 0.3854 | 7.4828   | 0.0000 | 0.0000 | UP   |
| Cxcr5  | 8.9734    | 1.9975  | 0.8843 | 2.2587   | 0.0239 | 0.0497 | UP   |
| Ackr3  | 375.5374  | 2.6985  | 0.2722 | 9.9135   | 0.0000 | 0.0000 | UP   |
| Ednra  | 215.2956  | 1.5370  | 0.2937 | 5.2335   | 0.0000 | 0.0000 | UP   |
| Ednrb  | 848.5889  | 1.6171  | 0.2192 | 7.3789   | 0.0000 | 0.0000 | UP   |
| Fpr1   | 27.5245   | 2.9024  | 0.8818 | 3.2916   | 0.0010 | 0.0031 | UP   |
| Fpr2   | 25.4664   | 3.9570  | 0.8139 | 4.8618   | 0.0000 | 0.0000 | UP   |
| Cxcr2  | 97.0042   | 5.2049  | 1.1353 | 4.5847   | 0.0000 | 0.0000 | UP   |
| Ltb4r2 | 146.4179  | -3.0707 | 0.5180 | -5.9284  | 0.0000 | 0.0000 | DOWN |
| Plaur  | 1692.0029 | 5.4275  | 0.2355 | 23.0473  | 0.0000 | 0.0000 | UP   |
| Plxna4 | 149.7609  | 1.2003  | 0.3204 | 3.7465   | 0.0002 | 0.0007 | UP   |
| Plxnb2 | 6925.4316 | -1.0110 | 0.0964 | -10.4874 | 0.0000 | 0.0000 | DOWN |
| Adm    | 465.1429  | 4.1666  | 0.3340 | 12.4732  | 0.0000 | 0.0000 | UP   |
| Adm2   | 3.8037    | 2.6914  | 1.3152 | 2.0464   | 0.0407 | 0.0785 | UP   |
| Agt    | 251.6757  | 1.0058  | 0.2340 | 4.2984   | 0.0000 | 0.0001 | UP   |
| Areg   | 1686.0722 | 4.9998  | 0.4828 | 10.3553  | 0.0000 | 0.0000 | UP   |
| Artn   | 19.6012   | 1.4555  | 0.4432 | 3.2839   | 0.0010 | 0.0032 | UP   |
| Bdnf   | 9.0312    | 3.7069  | 0.7983 | 4.6437   | 0.0000 | 0.0000 | UP   |
| Bmp8a  | 130.2823  | -4.3890 | 0.4670 | -9.3981  | 0.0000 | 0.0000 | DOWN |
| Btc    | 431.6760  | 2.9398  | 0.4651 | 6.3201   | 0.0000 | 0.0000 | UP   |
| Calca  | 45.2108   | 6.4524  | 0.8438 | 7.6472   | 0.0000 | 0.0000 | UP   |
| Caleb  | 63.3434   | 1.1707  | 0.4333 | 2.7014   | 0.0069 | 0.0169 | UP   |
| Cat    | 3684.0298 | -1.5429 | 0.2793 | -5.5234  | 0.0000 | 0.0000 | DOWN |
| Clefl  | 73.3329   | 1.3816  | 0.2795 | 4.9430   | 0.0000 | 0.0000 | UP   |
| Cmtm3  | 187.3383  | 1.0314  | 0.1964 | 5.2517   | 0.0000 | 0.0000 | UP   |
| Cmtm5  | 6.2389    | 2.1545  | 0.7964 | 2.7052   | 0.0068 | 0.0168 | UP   |
| Cntf   | 34.3813   | 1.0826  | 0.3100 | 3.4917   | 0.0005 | 0.0016 | UP   |
| Csf1   | 730.6519  | 2.2143  | 0.3281 | 6.7492   | 0.0000 | 0.0000 | UP   |
| Csf3   | 613.9188  | 8.4430  | 0.9851 | 8.5709   | 0.0000 | 0.0000 | UP   |
| Epgn   | 17.0214   | 2.3521  | 0.7489 | 3.1408   | 0.0017 | 0.0049 | UP   |
| Ereg   | 3109.5859 | 5.0281  | 0.3869 | 12.9956  | 0.0000 | 0.0000 | UP   |
| Esm1   | 64.2112   | 1.9521  | 0.4934 | 3.9566   | 0.0001 | 0.0003 | UP   |
| Fam3c  | 1617.6622 | -1.4279 | 0.1371 | -10.4118 | 0.0000 | 0.0000 | DOWN |
| Fgf12  | 11.8019   | 1.5921  | 0.6091 | 2.6137   | 0.0090 | 0.0212 | UP   |
| Fgf13  | 108.1787  | 1.3187  | 0.3435 | 3.8394   | 0.0001 | 0.0005 | UP   |
| Fgf9   | 80.1851   | -1.4580 | 0.2733 | -5.3337  | 0.0000 | 0.0000 | DOWN |
| Gal    | 149.4138  | 1.8420  | 0.5054 | 3.6443   | 0.0003 | 0.0009 | UP   |
| Gdnf   | 148.0060  | 2.4183  | 0.2048 | 11.8063  | 0.0000 | 0.0000 | UP   |
| Hamp   | 5.9230    | 3.3884  | 0.9240 | 3.6669   | 0.0002 | 0.0009 | UP   |
| Hbegf  | 1751.8931 | 3.1319  | 0.2918 | 10.7324  | 0.0000 | 0.0000 | UP   |

|           |           |         |        |         |        |        |      |
|-----------|-----------|---------|--------|---------|--------|--------|------|
| Il11      | 67.4325   | 3.4900  | 0.6793 | 5.1376  | 0.0000 | 0.0000 | UP   |
| Il17f     | 10.0814   | 3.3420  | 0.8862 | 3.7710  | 0.0002 | 0.0006 | UP   |
| Il1rn     | 447.7563  | 3.7498  | 0.6035 | 6.2134  | 0.0000 | 0.0000 | UP   |
| Inhba     | 195.4384  | 1.7741  | 0.3552 | 4.9953  | 0.0000 | 0.0000 | UP   |
| Inhbb     | 218.6645  | 3.5163  | 0.2137 | 16.4520 | 0.0000 | 0.0000 | UP   |
| Jag2      | 222.1416  | 1.7907  | 0.2988 | 5.9927  | 0.0000 | 0.0000 | UP   |
| Lif       | 550.8291  | 2.8882  | 0.4806 | 6.0090  | 0.0000 | 0.0000 | UP   |
| Lrsam1    | 224.0254  | -1.1719 | 0.1721 | -6.8111 | 0.0000 | 0.0000 | DOWN |
| Ngf       | 18.4199   | 2.1160  | 0.5164 | 4.0979  | 0.0000 | 0.0002 | UP   |
| Nmb       | 17.1129   | 1.7814  | 0.4379 | 4.0679  | 0.0000 | 0.0002 | UP   |
| Ccn3      | 79.2027   | 1.1663  | 0.2974 | 3.9220  | 0.0001 | 0.0003 | UP   |
| Npy       | 116.8891  | 2.1337  | 0.3590 | 5.9432  | 0.0000 | 0.0000 | UP   |
| Nrg1      | 539.9510  | 2.0218  | 0.4463 | 4.5300  | 0.0000 | 0.0000 | UP   |
| Nrg3      | 8.8892    | 1.5139  | 0.7350 | 2.0598  | 0.0394 | 0.0764 | UP   |
| Nrg4      | 33.9914   | -1.1272 | 0.3902 | -2.8890 | 0.0039 | 0.0101 | DOWN |
| Ntf3      | 23.6082   | -1.4861 | 0.5759 | -2.5805 | 0.0099 | 0.0231 | DOWN |
| Nts       | 323.6583  | -1.2322 | 0.5571 | -2.2117 | 0.0270 | 0.0551 | DOWN |
| Osm       | 61.3002   | 4.5065  | 0.7830 | 5.7552  | 0.0000 | 0.0000 | UP   |
| Endou     | 47.7751   | 2.1062  | 0.5093 | 4.1358  | 0.0000 | 0.0002 | UP   |
| Pdgfc     | 126.2196  | -1.1134 | 0.3008 | -3.7012 | 0.0002 | 0.0008 | DOWN |
| Pgf       | 61.4975   | 2.6061  | 0.3035 | 8.5872  | 0.0000 | 0.0000 | UP   |
| Pthlh     | 23.4649   | 2.3045  | 0.4524 | 5.0939  | 0.0000 | 0.0000 | UP   |
| Rabep2    | 179.7080  | -1.4699 | 0.2929 | -5.0182 | 0.0000 | 0.0000 | DOWN |
| Retn      | 108.4880  | 2.1428  | 0.7355 | 2.9135  | 0.0036 | 0.0095 | UP   |
| S100a6    | 1546.3193 | 1.2713  | 0.4175 | 3.0449  | 0.0023 | 0.0065 | UP   |
| Scg2      | 875.1652  | 1.3627  | 0.2618 | 5.2045  | 0.0000 | 0.0000 | UP   |
| Scgb3a1   | 44.4016   | 2.0936  | 0.3456 | 6.0579  | 0.0000 | 0.0000 | UP   |
| Sct       | 130.9670  | -1.0906 | 0.1755 | -6.2149 | 0.0000 | 0.0000 | DOWN |
| Sst       | 890.9748  | 1.1284  | 0.1778 | 6.3471  | 0.0000 | 0.0000 | UP   |
| Stc1      | 241.3811  | 3.1377  | 0.3318 | 9.4577  | 0.0000 | 0.0000 | UP   |
| Tac1      | 242.1234  | 2.0739  | 0.2613 | 7.9358  | 0.0000 | 0.0000 | UP   |
| Tgfb1     | 545.7158  | 1.2942  | 0.1906 | 6.7917  | 0.0000 | 0.0000 | UP   |
| Tgfb2     | 142.0968  | 1.5772  | 0.2767 | 5.7009  | 0.0000 | 0.0000 | UP   |
| Tnfrsf11b | 180.5629  | 1.9486  | 0.3929 | 4.9589  | 0.0000 | 0.0000 | UP   |
| Tnfsf13   | 94.8897   | -1.0898 | 0.3507 | -3.1072 | 0.0019 | 0.0054 | DOWN |
| Tnfsf13b  | 191.6063  | -1.0701 | 0.2804 | -3.8167 | 0.0001 | 0.0005 | DOWN |
| Tnfsf14   | 16.4798   | 1.8377  | 0.7586 | 2.4225  | 0.0154 | 0.0340 | UP   |
| Tnfsf15   | 88.5971   | 1.2334  | 0.4830 | 2.5538  | 0.0107 | 0.0247 | UP   |
| Tnfsf9    | 37.5178   | 2.1104  | 0.4092 | 5.1572  | 0.0000 | 0.0000 | UP   |
| Tslp      | 20.6206   | 2.2525  | 0.5689 | 3.9593  | 0.0001 | 0.0003 | UP   |

|           |            |         |        |          |        |        |      |
|-----------|------------|---------|--------|----------|--------|--------|------|
| Ucn2      | 4.3211     | 2.2037  | 0.8315 | 2.6502   | 0.0080 | 0.0193 | UP   |
| Vgf       | 58.6388    | 2.7196  | 0.3785 | 7.1860   | 0.0000 | 0.0000 | UP   |
| Vip       | 1202.1880  | 1.9179  | 0.3482 | 5.5086   | 0.0000 | 0.0000 | UP   |
| Acvr2b    | 183.1633   | -1.8561 | 0.2115 | -8.7763  | 0.0000 | 0.0000 | DOWN |
| Adcyap1r1 | 119.0527   | 1.3329  | 0.3393 | 3.9279   | 0.0001 | 0.0003 | UP   |
| Adipor2   | 6206.3398  | -1.6934 | 0.1287 | -13.1572 | 0.0000 | 0.0000 | DOWN |
| Adrb2     | 69.5692    | 1.8195  | 0.3967 | 4.5866   | 0.0000 | 0.0000 | UP   |
| Angpt4    | 4.8125     | 1.6776  | 0.8083 | 2.0754   | 0.0379 | 0.0740 | UP   |
| Avpr1a    | 165.7661   | 3.1083  | 0.2609 | 11.9142  | 0.0000 | 0.0000 | UP   |
| Cntfr     | 20.6249    | 1.7465  | 0.4083 | 4.2774   | 0.0000 | 0.0001 | UP   |
| Crlf2     | 174.0412   | 1.1630  | 0.2054 | 5.6615   | 0.0000 | 0.0000 | UP   |
| Csf2rb    | 656.8267   | 1.9821  | 0.3168 | 6.2576   | 0.0000 | 0.0000 | UP   |
| Csf3r     | 176.7796   | 2.5959  | 0.5258 | 4.9368   | 0.0000 | 0.0000 | UP   |
| Eng       | 784.5547   | 1.5220  | 0.1739 | 8.7501   | 0.0000 | 0.0000 | UP   |
| Esrl      | 17.2103    | 1.0446  | 0.4858 | 2.1503   | 0.0315 | 0.0630 | UP   |
| Esrra     | 2619.0510  | -1.1208 | 0.2081 | -5.3865  | 0.0000 | 0.0000 | DOWN |
| Fgfr1     | 604.6687   | 1.8644  | 0.1706 | 10.9291  | 0.0000 | 0.0000 | UP   |
| Fgfr4     | 336.6915   | 2.3910  | 0.4348 | 5.4986   | 0.0000 | 0.0000 | UP   |
| Flt1      | 807.4785   | 1.5668  | 0.2523 | 6.2089   | 0.0000 | 0.0000 | UP   |
| Galr3     | 4.9462     | -1.4399 | 0.7345 | -1.9602  | 0.0500 | 0.0933 | DOWN |
| Glp1r     | 6.3318     | -2.2289 | 0.8395 | -2.6550  | 0.0079 | 0.0191 | DOWN |
| Hnf4a     | 13060.4574 | -1.0576 | 0.1073 | -9.8598  | 0.0000 | 0.0000 | DOWN |
| Hnf4g     | 6758.1199  | -2.9911 | 0.2466 | -12.1307 | 0.0000 | 0.0000 | DOWN |
| Htr3a     | 108.5433   | 1.5708  | 0.3346 | 4.6951   | 0.0000 | 0.0000 | UP   |
| Htr3b     | 15.0147    | 1.2297  | 0.6047 | 2.0336   | 0.0420 | 0.0806 | UP   |
| Ifngr2    | 3702.9410  | -1.2968 | 0.1511 | -8.5844  | 0.0000 | 0.0000 | DOWN |
| Il10rb    | 1529.5440  | -1.2298 | 0.2259 | -5.4428  | 0.0000 | 0.0000 | DOWN |
| Il12rb1   | 64.7338    | -1.0981 | 0.5573 | -1.9704  | 0.0488 | 0.0914 | DOWN |
| Il2rb     | 378.9121   | 1.3957  | 0.3080 | 4.5316   | 0.0000 | 0.0000 | UP   |
| Il18rap   | 109.2781   | 1.9197  | 0.4540 | 4.2283   | 0.0000 | 0.0001 | UP   |
| Il1r1     | 1034.1220  | 2.9434  | 0.2913 | 10.1045  | 0.0000 | 0.0000 | UP   |
| Il1r2     | 407.4783   | 4.2911  | 0.3547 | 12.0995  | 0.0000 | 0.0000 | UP   |
| Il1rl1    | 491.7658   | 1.8832  | 0.5240 | 3.5936   | 0.0003 | 0.0011 | UP   |
| Il20rb    | 74.5648    | 1.5068  | 0.2068 | 7.2847   | 0.0000 | 0.0000 | UP   |
| Il22ra2   | 93.2288    | 1.1852  | 0.5046 | 2.3489   | 0.0188 | 0.0405 | UP   |
| Il23r     | 14.0864    | 1.5609  | 0.5634 | 2.7703   | 0.0056 | 0.0140 | UP   |
| Il2ra     | 39.5191    | 1.5007  | 0.3918 | 3.8301   | 0.0001 | 0.0005 | UP   |
| Il31ra    | 5.0028     | 1.9505  | 0.8614 | 2.2644   | 0.0235 | 0.0490 | UP   |
| Il9r      | 20.3517    | -1.3699 | 0.4849 | -2.8250  | 0.0047 | 0.0121 | DOWN |
| Insr      | 1782.0276  | -1.2318 | 0.1436 | -8.5773  | 0.0000 | 0.0000 | DOWN |

|           |           |         |        |          |        |        |      |
|-----------|-----------|---------|--------|----------|--------|--------|------|
| Ngfr      | 205.1137  | 1.5135  | 0.2780 | 5.4445   | 0.0000 | 0.0000 | UP   |
| Nr1d1     | 1687.8695 | -1.4853 | 0.3308 | -4.4903  | 0.0000 | 0.0000 | DOWN |
| Nr1h3     | 532.5942  | -1.5086 | 0.2474 | -6.0979  | 0.0000 | 0.0000 | DOWN |
| Nr1i3     | 584.6145  | -1.5333 | 0.4922 | -3.1149  | 0.0018 | 0.0053 | DOWN |
| Nr3c1     | 2659.1901 | -1.2011 | 0.1577 | -7.6144  | 0.0000 | 0.0000 | DOWN |
| Nr4a1     | 1345.3037 | 4.5399  | 0.5112 | 8.8804   | 0.0000 | 0.0000 | UP   |
| Nr4a2     | 224.9731  | 1.7426  | 0.3996 | 4.3607   | 0.0000 | 0.0001 | UP   |
| Nr4a3     | 403.6485  | 3.9691  | 0.3918 | 10.1304  | 0.0000 | 0.0000 | UP   |
| Oprd1     | 28.2635   | 1.2631  | 0.5998 | 2.1060   | 0.0352 | 0.0694 | UP   |
| Osmr      | 707.7684  | 2.4932  | 0.2197 | 11.3503  | 0.0000 | 0.0000 | UP   |
| Pgrmc2    | 1235.2524 | -1.0646 | 0.3207 | -3.3196  | 0.0009 | 0.0028 | DOWN |
| Prlr      | 2619.0739 | -1.8102 | 0.1804 | -10.0355 | 0.0000 | 0.0000 | DOWN |
| Ptger2    | 59.3093   | 1.0663  | 0.3791 | 2.8126   | 0.0049 | 0.0125 | UP   |
| Rora      | 374.1600  | 1.8971  | 0.2721 | 6.9734   | 0.0000 | 0.0000 | UP   |
| Rorc      | 608.2115  | -1.3224 | 0.2997 | -4.4130  | 0.0000 | 0.0000 | DOWN |
| S1pr1     | 655.4066  | 2.9328  | 0.2487 | 11.7913  | 0.0000 | 0.0000 | UP   |
| Sdc1      | 2816.8532 | 1.1152  | 0.1784 | 6.2515   | 0.0000 | 0.0000 | UP   |
| Sdc4      | 5282.1558 | 1.9142  | 0.2847 | 6.7245   | 0.0000 | 0.0000 | UP   |
| Sstr5     | 9.9927    | -1.2578 | 0.5217 | -2.4108  | 0.0159 | 0.0349 | DOWN |
| Tacr1     | 189.1738  | 2.3210  | 0.4260 | 5.4488   | 0.0000 | 0.0000 | UP   |
| Tgfbr2    | 2425.1315 | 1.4596  | 0.0851 | 17.1590  | 0.0000 | 0.0000 | UP   |
| Tie1      | 397.1344  | 1.3349  | 0.2636 | 5.0650   | 0.0000 | 0.0000 | UP   |
| Tnfrsf12a | 1399.3043 | 4.5505  | 0.3109 | 14.6378  | 0.0000 | 0.0000 | UP   |
| Tnfrsf18  | 38.4578   | 1.1907  | 0.4095 | 2.9078   | 0.0036 | 0.0096 | UP   |
| Tnfrsf19  | 117.5084  | -1.0222 | 0.3544 | -2.8845  | 0.0039 | 0.0103 | DOWN |
| Tnfrsf1b  | 1041.5165 | 2.3037  | 0.2040 | 11.2921  | 0.0000 | 0.0000 | UP   |
| Tnfrsf4   | 51.5370   | 1.8572  | 0.3015 | 6.1591   | 0.0000 | 0.0000 | UP   |
| Tnfrsf9   | 39.0478   | 2.0438  | 0.4967 | 4.1145   | 0.0000 | 0.0002 | UP   |
| Tshr      | 16.5057   | 2.5312  | 0.8009 | 3.1602   | 0.0016 | 0.0046 | UP   |
| Tubb3     | 175.7552  | 1.4654  | 0.2929 | 5.0027   | 0.0000 | 0.0000 | UP   |
| Vipr1     | 4513.8981 | -1.1301 | 0.2608 | -4.3328  | 0.0000 | 0.0001 | DOWN |
| Klrc1     | 11.6275   | 1.3909  | 0.5992 | 2.3214   | 0.0203 | 0.0432 | UP   |
| Icam1     | 1026.8552 | 3.2805  | 0.3443 | 9.5293   | 0.0000 | 0.0000 | UP   |
| Pik3r2    | 1129.2873 | -1.1951 | 0.1341 | -8.9091  | 0.0000 | 0.0000 | DOWN |
| Shc2      | 41.6453   | 1.0496  | 0.3549 | 2.9575   | 0.0031 | 0.0084 | UP   |
| Shc4      | 20.0969   | 1.0319  | 0.4943 | 2.0876   | 0.0368 | 0.0721 | UP   |
| Fos       | 3204.6385 | 1.0598  | 0.3947 | 2.6852   | 0.0072 | 0.0176 | UP   |
| Nfkbia    | 3749.1397 | 2.3695  | 0.2555 | 9.2736   | 0.0000 | 0.0000 | UP   |
| Nfkbie    | 254.2081  | 1.5590  | 0.2904 | 5.3680   | 0.0000 | 0.0000 | UP   |
| Cd28      | 198.4327  | 1.1140  | 0.3791 | 2.9387   | 0.0033 | 0.0088 | UP   |

|         |          |        |        |         |        |        |    |
|---------|----------|--------|--------|---------|--------|--------|----|
| Icos    | 96.2708  | 2.3271 | 0.2887 | 8.0595  | 0.0000 | 0.0000 | UP |
| Map3k8  | 195.7764 | 3.3398 | 0.3212 | 10.3983 | 0.0000 | 0.0000 | UP |
| Map3k14 | 281.8035 | 1.0699 | 0.2177 | 4.9139  | 0.0000 | 0.0000 | UP |
| Ctla4   | 554.6045 | 5.0836 | 0.3328 | 15.2753 | 0.0000 | 0.0000 | UP |

**Table S2 61 FRGs in mice after intestinal ischemia/reperfusion**

| Genes   | log2FoldChange | pvalue     | padj       | change |
|---------|----------------|------------|------------|--------|
| Cs      | -1.0861721     | 2.31E-09   | 2.14E-08   | DOWN   |
| Acsf2   | -2.6450407     | 4.40E-80   | 1.17E-76   | DOWN   |
| Duox2   | -1.4777547     | 0.00088474 | 0.00278425 | DOWN   |
| Scp2    | -1.645005      | 6.34E-17   | 1.76E-15   | DOWN   |
| Acsl4   | 2.31805973     | 1.20E-19   | 4.40E-18   | UP     |
| Lpcat3  | -1.0311657     | 8.37E-08   | 5.92E-07   | DOWN   |
| Hmox1   | 3.32433602     | 6.98E-10   | 7.11E-09   | UP     |
| Ncoa4   | -1.0684909     | 4.98E-06   | 2.55E-05   | DOWN   |
| Alox15  | -1.5687421     | 1.48E-08   | 1.21E-07   | DOWN   |
| Aloxe3  | 3.60880522     | 4.98E-08   | 3.69E-07   | UP     |
| Aco1    | -1.3361637     | 3.93E-09   | 3.51E-08   | DOWN   |
| Atg4d   | -1.0397795     | 8.31E-09   | 7.08E-08   | DOWN   |
| Atg13   | -1.1055191     | 3.03E-20   | 1.20E-18   | DOWN   |
| Ulk2    | -1.2744868     | 7.09E-07   | 4.24E-06   | DOWN   |
| Zeb1    | 1.34878272     | 2.02E-13   | 3.50E-12   | UP     |
| Dpp4    | -2.5600692     | 4.89E-21   | 2.15E-19   | DOWN   |
| Cdo1    | 1.08233565     | 0.00143363 | 0.0042611  | UP     |
| Abcc1   | 1.7203088      | 4.81E-15   | 1.04E-13   | UP     |
| Hilpda  | 2.20899272     | 9.55E-10   | 9.49E-09   | UP     |
| Hif1a   | 1.75107446     | 7.14E-09   | 6.15E-08   | UP     |
| Ano6    | -1.2093019     | 2.40E-10   | 2.63E-09   | DOWN   |
| Tnfaip3 | 1.76869422     | 9.18E-16   | 2.20E-14   | UP     |
| Atf3    | 1.83108078     | 0.00024854 | 0.00088936 | UP     |
| Idh1    | -1.2357928     | 4.29E-08   | 3.23E-07   | DOWN   |
| Ptgs2   | 4.15867504     | 2.32E-40   | 5.70E-38   | UP     |
| Dusp1   | 4.74878517     | 1.04E-51   | 5.33E-49   | UP     |
| Mt3     | 2.12378104     | 4.09E-05   | 0.00017502 | UP     |
| Slc7a11 | 2.47986486     | 5.90E-06   | 2.98E-05   | UP     |
| Ddit4   | 1.45603412     | 5.63E-06   | 2.85E-05   | UP     |
| Jdp2    | 2.66335779     | 2.22E-22   | 1.10E-20   | UP     |
| Vldlr   | 1.32224035     | 0.00080661 | 0.00256112 | UP     |
| Slc7a5  | 1.2541165      | 7.03E-11   | 8.42E-10   | UP     |

|          |            |            |               |
|----------|------------|------------|---------------|
| Klhl24   | -1.6879971 | 5.31E-15   | 1.15E-13 DOWN |
| Trib3    | -2.4521652 | 1.26E-07   | 8.57E-07 DOWN |
| Gdf15    | 3.53491871 | 1.10E-15   | 2.63E-14 UP   |
| Rgs4     | 1.71372565 | 8.06E-06   | 3.97E-05 UP   |
| Il6      | 7.70891185 | 4.56E-15   | 9.96E-14 UP   |
| Cxcl2    | 8.07921167 | 2.08E-59   | 1.44E-56 UP   |
| Rela     | 1.3273225  | 5.08E-20   | 1.95E-18 UP   |
| Hsd17b11 | -1.4613955 | 1.20E-09   | 1.17E-08 DOWN |
| Setd1b   | -1.0379167 | 5.14E-16   | 1.28E-14 DOWN |
| Slc40a1  | -2.2219733 | 1.45E-07   | 9.82E-07 DOWN |
| Hamp     | 3.38839342 | 0.0002455  | 0.00088026 UP |
| Hspb1    | 3.5894978  | 8.06E-20   | 3.03E-18 UP   |
| Slc2a1   | 2.62267224 | 9.41E-16   | 2.25E-14 UP   |
| Slc2a3   | 1.68484181 | 6.32E-06   | 3.17E-05 UP   |
| Slc2a6   | 1.14121636 | 0.00706668 | 0.01725316 UP |
| Eif2ak4  | 1.15054431 | 8.46E-06   | 4.15E-05 UP   |
| Nnmt     | 1.8769784  | 0.00025109 | 0.00089652 UP |
| Plin4    | 2.13824381 | 2.62E-06   | 1.41E-05 UP   |
| Rrm2     | 1.4624116  | 2.20E-06   | 1.20E-05 UP   |
| Capg     | 1.47037955 | 1.06E-07   | 7.32E-07 UP   |
| Hnf4a    | -1.0576266 | 6.22E-23   | 3.28E-21 DOWN |
| Gclc     | 2.0408031  | 8.94E-08   | 6.30E-07 UP   |
| Sqstm1   | 1.09298194 | 1.04E-13   | 1.87E-12 UP   |
| Hspa5    | 1.0396077  | 3.28E-15   | 7.33E-14 UP   |
| Cd44     | 2.47558298 | 2.87E-42   | 8.65E-40 UP   |
| Zfp36    | 1.60890505 | 1.09E-08   | 9.07E-08 UP   |
| Chmp5    | -1.1037975 | 1.85E-18   | 6.10E-17 DOWN |
| Gclm     | -1.323224  | 8.73E-15   | 1.84E-13 DOWN |
| Cryab    | 2.01030589 | 2.61E-17   | 7.58E-16 UP   |

**Table S3 294 IRGs in mice after intestinal ischemia/reperfusion**

| Genes  | log2FoldChange | pvalue   | padj       | change |
|--------|----------------|----------|------------|--------|
| Cd8a   | -1.447108      | 1.97E-05 | 8.97E-05   | DOWN   |
| Ctsl   | 1.12489734     | 1.63E-14 | 3.31E-13   | UP     |
| Fcer1g | 1.1507313      | 2.80E-05 | 0.00012365 | UP     |
| Hspa1a | 3.00172898     | 5.08E-09 | 4.46E-08   | UP     |
| Hspa1b | 2.74237231     | 1.58E-07 | 1.06E-06   | UP     |
| Hspa2  | 1.86986864     | 3.78E-07 | 2.37E-06   | UP     |
| Hspa5  | 1.0396077      | 3.28E-15 | 7.33E-14   | UP     |

|         |            |            |                 |
|---------|------------|------------|-----------------|
| Orm1    | 3.07893717 | 3.99E-05   | 0.00017093 UP   |
| Tnf     | 1.88567287 | 5.46E-07   | 3.33E-06 UP     |
| Aen     | 1.29053251 | 1.49E-12   | 2.28E-11 UP     |
| Isg20   | 1.33556543 | 9.30E-07   | 5.44E-06 UP     |
| Bcl3    | 1.76135837 | 1.01E-11   | 1.38E-10 UP     |
| Duox2   | -1.4777547 | 0.00088474 | 0.00278425 DOWN |
| Tlr3    | -1.454561  | 4.46E-33   | 6.59E-31 DOWN   |
| Ifih1   | -1.4352704 | 5.50E-13   | 8.92E-12 DOWN   |
| Trim5   | -2.2981857 | 2.64E-26   | 1.99E-24 DOWN   |
| Ido1    | -4.2875318 | 1.68E-15   | 3.86E-14 DOWN   |
| Gdf15   | 3.53491871 | 1.10E-15   | 2.63E-14 UP     |
| Adipoq  | 2.27552807 | 0.00687799 | 0.01686668 UP   |
| Stat1   | -1.100738  | 0.00684533 | 0.0167995 DOWN  |
| Socs3   | 3.42269564 | 1.54E-40   | 3.84E-38 UP     |
| Tnfsf10 | -2.3448026 | 8.71E-06   | 4.26E-05 DOWN   |
| Il15    | -2.1465997 | 6.23E-16   | 1.53E-14 DOWN   |
| Cd40    | 1.36217394 | 5.94E-05   | 0.00024542 UP   |
| Zyx     | 1.20045406 | 1.59E-09   | 1.51E-08 UP     |
| Ikbke   | -1.4938258 | 1.09E-20   | 4.61E-19 DOWN   |
| Isg15   | -2.0793811 | 5.45E-05   | 0.0002268 DOWN  |
| Dhx58   | -1.0567817 | 0.00099197 | 0.00307201 DOWN |
| Tnfaip3 | 1.76869422 | 9.18E-16   | 2.20E-14 UP     |
| F2r     | 1.34481599 | 2.80E-10   | 3.03E-09 UP     |
| Eln     | 1.67808246 | 0.00011615 | 0.00044981 UP   |
| Il27    | 2.44224563 | 0.0002675  | 0.00094782 UP   |
| Lep     | 6.42050934 | 9.75E-09   | 8.18E-08 UP     |
| Klkb1   | -1.8424371 | 0.00145618 | 0.00432167 DOWN |
| Csrp1   | 1.56114588 | 1.97E-09   | 1.86E-08 UP     |
| Irf5    | 1.46884147 | 3.35E-15   | 7.47E-14 UP     |
| Ccr6    | 1.34418524 | 0.02701384 | 0.0551049 UP    |
| Tlr8    | 1.89883419 | 9.74E-08   | 6.80E-07 UP     |
| Wnt5a   | -1.4882917 | 6.04E-08   | 4.41E-07 DOWN   |
| Tyk2    | -1.0464308 | 4.44E-12   | 6.39E-11 DOWN   |
| Tpm2    | 1.17807842 | 0.0002921  | 0.00102824 UP   |
| Ahnak   | 1.07415466 | 1.33E-15   | 3.11E-14 UP     |
| Fgf2    | 2.12976558 | 1.95E-05   | 8.89E-05 UP     |
| Tkfc    | -1.0821031 | 0.00128356 | 0.00385383 DOWN |
| Nfkbiz  | 1.04267424 | 0.00036597 | 0.00125927 UP   |
| Robo3   | 1.25414015 | 0.03756033 | 0.07337282 UP   |
| Slc11a1 | 2.05996515 | 5.78E-15   | 1.23E-13 UP     |
| Sting1  | 1.78124211 | 1.05E-12   | 1.64E-11 UP     |



|          |            |            |                 |
|----------|------------|------------|-----------------|
| Des      | 1.2615283  | 5.15E-05   | 0.00021581 UP   |
| Ccl4     | 1.84418717 | 0.00128812 | 0.00386606 UP   |
| Tnfrsf11 | 2.5993683  | 0.0004438  | 0.00150086 UP   |
| Klrl1    | 1.40858098 | 0.00235606 | 0.00656717 UP   |
| Jund     | 1.454659   | 8.67E-05   | 0.00034581 UP   |
| Cldn4    | 1.78017475 | 1.42E-06   | 8.04E-06 UP     |
| Irf7     | -2.0770622 | 1.60E-15   | 3.70E-14 DOWN   |
| Il18     | -1.2620038 | 0.01195756 | 0.02725735 DOWN |
| Rela     | 1.3273225  | 5.08E-20   | 1.95E-18 UP     |
| Ptx3     | 6.00726503 | 2.82E-32   | 3.81E-30 UP     |
| Ptgs2    | 4.15867504 | 2.32E-40   | 5.70E-38 UP     |
| Cd14     | 3.25620047 | 1.72E-67   | 2.28E-64 UP     |
| Hmox1    | 3.32433602 | 6.98E-10   | 7.11E-09 UP     |
| Hgf      | 1.66818349 | 1.65E-06   | 9.24E-06 UP     |
| Plscr1   | 2.57342622 | 3.69E-08   | 2.81E-07 UP     |
| Rsad2    | -1.0783179 | 0.03706023 | 0.07252022 DOWN |
| Pdcd1    | 2.40625821 | 1.55E-05   | 7.23E-05 UP     |
| Pcsk2    | 1.54826638 | 2.24E-06   | 1.22E-05 UP     |
| Arg2     | -1.8455028 | 9.07E-06   | 4.41E-05 DOWN   |
| Vtn      | 1.37348909 | 0.00491089 | 0.01249818 UP   |
| Vim      | 1.99463552 | 8.08E-26   | 5.75E-24 UP     |
| Vcam1    | 2.13325895 | 2.39E-13   | 4.10E-12 UP     |
| Gfap     | 4.99385565 | 2.73E-35   | 5.06E-33 UP     |
| Ager     | 2.16215565 | 2.24E-14   | 4.46E-13 UP     |
| Actg1    | 1.5157334  | 8.61E-16   | 2.08E-14 UP     |
| Aco1     | -1.3361637 | 3.93E-09   | 3.51E-08 DOWN   |
| Ccl17    | 1.54912241 | 0.0221685  | 0.04664098 UP   |
| Ccr3     | -1.8671699 | 0.01127235 | 0.02588778 DOWN |
| Ackr2    | 1.96537798 | 2.83E-07   | 1.82E-06 UP     |
| Ccr7     | 2.95748826 | 1.54E-09   | 1.47E-08 UP     |
| Ccr8     | 3.26185429 | 0.0009756  | 0.00302953 UP   |
| Ccl2     | 6.67466031 | 7.97E-28   | 7.14E-26 UP     |
| Ccl7     | 5.36464318 | 4.27E-14   | 8.10E-13 UP     |
| Ccl3     | 1.51629911 | 2.54E-05   | 0.00011297 UP   |
| Ccl11    | 2.98817785 | 8.77E-16   | 2.11E-14 UP     |
| Ccr5     | 1.38168513 | 0.00020664 | 0.00075172 UP   |
| Xcl1     | -1.86598   | 0.00863608 | 0.02057082 DOWN |
| Ccr1     | 2.19599106 | 2.88E-11   | 3.68E-10 UP     |
| Cxcl1    | 8.13802891 | 6.41E-45   | 2.32E-42 UP     |
| Cxcl10   | 1.51894164 | 0.0034325  | 0.00914568 UP   |
| Cxcr4    | 1.55458281 | 4.23E-06   | 2.19E-05 UP     |

|        |            |            |                 |
|--------|------------|------------|-----------------|
| Cxcl2  | 8.07921167 | 2.08E-59   | 1.44E-56 UP     |
| Tafa3  | -2.8670101 | 0.00017305 | 0.00064035 DOWN |
| Tafa1  | 2.05443586 | 0.00094648 | 0.0029483 UP    |
| Il6    | 7.70891185 | 4.56E-15   | 9.96E-14 UP     |
| Il1b   | 4.05131742 | 4.12E-22   | 1.99E-20 UP     |
| Il13   | -3.0863183 | 0.01588274 | 0.03484894 DOWN |
| Il10   | 4.57589738 | 1.72E-24   | 1.07E-22 UP     |
| Mif    | 1.0940852  | 3.81E-14   | 7.30E-13 UP     |
| Ptgdr  | -4.6161173 | 3.01E-12   | 4.43E-11 DOWN   |
| Cd86   | 1.82882404 | 6.96E-08   | 5.01E-07 UP     |
| Hck    | -1.0379613 | 1.01E-05   | 4.90E-05 DOWN   |
| Vdr    | -1.4275168 | 1.20E-07   | 8.24E-07 DOWN   |
| Txk    | 1.09227292 | 0.01319056 | 0.02967733 UP   |
| Blnk   | 1.92324375 | 5.88E-09   | 5.12E-08 UP     |
| Vav2   | -1.1699223 | 5.42E-10   | 5.61E-09 DOWN   |
| Chp2   | -2.1076297 | 5.32E-09   | 4.66E-08 DOWN   |
| Nfatc1 | 1.12586394 | 3.48E-13   | 5.79E-12 UP     |
| Nfatc2 | 2.00031034 | 3.07E-28   | 2.83E-26 UP     |
| Cxcl13 | 1.82568373 | 0.00082784 | 0.00262069 UP   |
| Cxcl14 | 1.50334551 | 0.00057122 | 0.00188384 UP   |
| Cxcl3  | 6.61682776 | 1.80E-09   | 1.71E-08 UP     |
| Cxcl5  | 5.59526742 | 2.98E-09   | 2.72E-08 UP     |
| Ccn1   | 3.72613956 | 1.86E-16   | 4.87E-15 UP     |
| Edn2   | -2.7714841 | 1.80E-06   | 1.00E-05 DOWN   |
| Edn3   | -2.6417506 | 1.14E-16   | 3.07E-15 DOWN   |
| Fgf10  | 1.11965366 | 0.0055399  | 0.01390898 UP   |
| Pf4    | 2.44637867 | 5.26E-13   | 8.56E-12 UP     |
| Plau   | 1.96896708 | 5.44E-06   | 2.76E-05 UP     |
| Ppbp   | 5.38763017 | 3.07E-06   | 1.64E-05 UP     |
| Sema3c | 1.63395998 | 3.44E-06   | 1.82E-05 UP     |
| Sema3f | 1.80074832 | 4.60E-17   | 1.30E-15 UP     |
| Sema4a | -1.1522313 | 4.35E-08   | 3.26E-07 DOWN   |
| Sema4c | 3.14882256 | 2.03E-31   | 2.50E-29 UP     |
| Sema4f | 1.38221323 | 0.01048681 | 0.02433952 UP   |
| Sema4g | -1.315352  | 1.06E-09   | 1.05E-08 DOWN   |
| Sema6a | -2.4929241 | 1.17E-22   | 6.00E-21 DOWN   |
| Sema6b | 2.09849008 | 1.98E-13   | 3.44E-12 UP     |
| Sema7a | 2.02049107 | 1.50E-08   | 1.23E-07 UP     |
| Tnc    | 1.4892001  | 5.10E-07   | 3.13E-06 UP     |
| Tymp   | -2.8504684 | 9.66E-08   | 6.75E-07 DOWN   |
| C5ar1  | 1.7913419  | 2.32E-06   | 1.26E-05 UP     |

|        |            |            |               |
|--------|------------|------------|---------------|
| Ccrl2  | 2.88364302 | 7.28E-14   | 1.34E-12 UP   |
| Cxcr5  | 1.99749118 | 0.02390093 | 0.04967657 UP |
| Ackr3  | 2.69853829 | 3.64E-23   | 2.01E-21 UP   |
| Ednra  | 1.53702828 | 1.66E-07   | 1.11E-06 UP   |
| Ednrb  | 1.61708261 | 1.60E-13   | 2.79E-12 UP   |
| Fpr1   | 2.90240105 | 0.00099634 | 0.0030826 UP  |
| Fpr2   | 3.95696347 | 1.16E-06   | 6.69E-06 UP   |
| Cxcr2  | 5.20489902 | 4.55E-06   | 2.34E-05 UP   |
| Ltb4r2 | -3.0706779 | 3.06E-09   | 2.79E-08 DOWN |
| Plaur  | 5.42751698 | 1.57E-117  | 2.50E-113 UP  |
| Plxna4 | 1.20029148 | 0.00017934 | 0.00066086 UP |
| Plxnb2 | -1.0109764 | 9.87E-26   | 6.99E-24 DOWN |
| Adm    | 4.16661706 | 1.05E-35   | 2.01E-33 UP   |
| Adm2   | 2.69138866 | 0.04071348 | 0.07846581 UP |
| Agt    | 1.00579298 | 1.72E-05   | 7.92E-05 UP   |
| Areg   | 4.99981414 | 3.96E-25   | 2.64E-23 UP   |
| Artn   | 1.45552633 | 0.00102384 | 0.00315479 UP |
| Bdnf   | 3.7068726  | 3.42E-06   | 1.81E-05 UP   |
| Bmp8a  | -4.3890291 | 5.56E-21   | 2.43E-19 DOWN |
| Btc    | 2.9397892  | 2.61E-10   | 2.84E-09 UP   |
| Calca  | 6.45236441 | 2.05E-14   | 4.10E-13 UP   |
| Calcb  | 1.17065572 | 0.00690455 | 0.01691101 UP |
| Cat    | -1.5428846 | 3.32E-08   | 2.57E-07 DOWN |
| Clcf1  | 1.3816141  | 7.69E-07   | 4.57E-06 UP   |
| Cmtm3  | 1.03141962 | 1.51E-07   | 1.01E-06 UP   |
| Cmtm5  | 2.15445097 | 0.00682606 | 0.01675479 UP |
| Cntf   | 1.08257742 | 0.00047994 | 0.00161146 UP |
| Csf1   | 2.21427389 | 1.49E-11   | 1.98E-10 UP   |
| Csf3   | 8.44295913 | 1.03E-17   | 3.16E-16 UP   |
| Epgn   | 2.35210984 | 0.00168476 | 0.00491142 UP |
| Ereg   | 5.02812729 | 1.30E-38   | 2.91E-36 UP   |
| Esm1   | 1.95213456 | 7.60E-05   | 0.00030715 UP |
| Fam3c  | -1.4278846 | 2.19E-25   | 1.49E-23 DOWN |
| Fgf12  | 1.59214487 | 0.00895608 | 0.02124906 UP |
| Fgf13  | 1.31866162 | 0.00012335 | 0.00047527 UP |
| Fgf9   | -1.4579549 | 9.62E-08   | 6.73E-07 DOWN |
| Gal    | 1.84198025 | 0.00026812 | 0.00094962 UP |
| Gdnf   | 2.41829371 | 3.62E-32   | 4.77E-30 UP   |
| Hamp   | 3.38839342 | 0.0002455  | 0.00088026 UP |
| Hbegf  | 3.13192017 | 7.17E-27   | 5.72E-25 UP   |
| Il11   | 3.48999668 | 2.78E-07   | 1.79E-06 UP   |

|           |            |            |                 |
|-----------|------------|------------|-----------------|
| Il17f     | 3.34197653 | 0.00016262 | 0.0006061 UP    |
| Il1rn     | 3.74977058 | 5.18E-10   | 5.40E-09 UP     |
| Inhba     | 1.77408855 | 5.88E-07   | 3.56E-06 UP     |
| Inhbb     | 3.51631567 | 8.12E-61   | 6.17E-58 UP     |
| Jag2      | 1.79074051 | 2.06E-09   | 1.93E-08 UP     |
| Lif       | 2.88819269 | 1.87E-09   | 1.76E-08 UP     |
| Lrsam1    | -1.1718928 | 9.68E-12   | 1.33E-10 DOWN   |
| Ngf       | 2.1160209  | 4.17E-05   | 0.00017787 UP   |
| Nmb       | 1.78138391 | 4.74E-05   | 0.00020007 UP   |
| Ccn3      | 1.1663286  | 8.78E-05   | 0.00034988 UP   |
| Npy       | 2.13366654 | 2.79E-09   | 2.56E-08 UP     |
| Nrg1      | 2.02183922 | 5.90E-06   | 2.98E-05 UP     |
| Nrg3      | 1.51391787 | 0.03942119 | 0.0764091 UP    |
| Nrg4      | -1.1272174 | 0.00386413 | 0.01014993 DOWN |
| Ntf3      | -1.4861391 | 0.00986583 | 0.02312028 DOWN |
| Nts       | -1.2322199 | 0.02698847 | 0.05506779 DOWN |
| Osm       | 4.50651364 | 8.65E-09   | 7.34E-08 UP     |
| Endou     | 2.10623011 | 3.54E-05   | 0.00015302 UP   |
| Pdgfc     | -1.1134112 | 0.00021458 | 0.00077813 DOWN |
| Pgf       | 2.6060886  | 8.92E-18   | 2.77E-16 UP     |
| Pthlh     | 2.3045305  | 3.51E-07   | 2.22E-06 UP     |
| Rabep2    | -1.4698559 | 5.22E-07   | 3.19E-06 DOWN   |
| Retn      | 2.14284418 | 0.00357396 | 0.00947513 UP   |
| S100a6    | 1.27130472 | 0.0023278  | 0.00649975 UP   |
| Scg2      | 1.36265269 | 1.94E-07   | 1.28E-06 UP     |
| Scgb3a1   | 2.09360011 | 1.38E-09   | 1.33E-08 UP     |
| Sct       | -1.0906231 | 5.13E-10   | 5.36E-09 DOWN   |
| Sst       | 1.1283818  | 2.19E-10   | 2.42E-09 UP     |
| Stc1      | 3.13766974 | 3.15E-21   | 1.42E-19 UP     |
| Tac1      | 2.07385209 | 2.09E-15   | 4.77E-14 UP     |
| Tgfb1     | 1.29420236 | 1.11E-11   | 1.51E-10 UP     |
| Tgfb2     | 1.57722204 | 1.19E-08   | 9.89E-08 UP     |
| Tnfrsf11b | 1.94856112 | 7.09E-07   | 4.24E-06 UP     |
| Tnfsf13   | -1.089797  | 0.00188893 | 0.00541263 DOWN |
| Tnfsf13b  | -1.0700675 | 0.00013524 | 0.00051524 DOWN |
| Tnfsf14   | 1.83769213 | 0.01541592 | 0.03397551 UP   |
| Tnfsf15   | 1.23341675 | 0.01065402 | 0.02467736 UP   |
| Tnfsf9    | 2.11042978 | 2.51E-07   | 1.62E-06 UP     |
| Tslp      | 2.25246868 | 7.52E-05   | 0.00030404 UP   |
| Ucn2      | 2.20367796 | 0.00804331 | 0.01933083 UP   |
| Vgf       | 2.71960278 | 6.67E-13   | 1.07E-11 UP     |

|           |            |            |                 |
|-----------|------------|------------|-----------------|
| Vip       | 1.91788372 | 3.62E-08   | 2.76E-07 UP     |
| Acvr2b    | -1.8560936 | 1.69E-18   | 5.63E-17 DOWN   |
| Adcyap1r1 | 1.33288363 | 8.57E-05   | 0.00034231 UP   |
| Adipor2   | -1.6933974 | 1.55E-39   | 3.63E-37 DOWN   |
| Adrb2     | 1.819509   | 4.51E-06   | 2.32E-05 UP     |
| Angpt4    | 1.67763671 | 0.03794518 | 0.07399774 UP   |
| Avpr1a    | 3.10829996 | 9.98E-33   | 1.41E-30 UP     |
| Cntfr     | 1.74648068 | 1.89E-05   | 8.65E-05 UP     |
| Crlf2     | 1.16297949 | 1.50E-08   | 1.23E-07 UP     |
| Csf2rb    | 1.9821248  | 3.91E-10   | 4.13E-09 UP     |
| Csf3r     | 2.59590998 | 7.94E-07   | 4.70E-06 UP     |
| Eng       | 1.52198931 | 2.13E-18   | 7.01E-17 UP     |
| Esr1      | 1.0446123  | 0.03153463 | 0.06298239 UP   |
| Esrra     | -1.120843  | 7.19E-08   | 5.16E-07 DOWN   |
| Fgfr1     | 1.86443542 | 8.37E-28   | 7.38E-26 UP     |
| Fgfr4     | 2.3909688  | 3.83E-08   | 2.91E-07 UP     |
| Flt1      | 1.56675501 | 5.34E-10   | 5.54E-09 UP     |
| Galr3     | -1.4398569 | 0.04996739 | 0.09325843 DOWN |
| Glp1r     | -2.2289255 | 0.00793135 | 0.01910615 DOWN |
| Hnf4a     | -1.0576266 | 6.22E-23   | 3.28E-21 DOWN   |
| Hnf4g     | -2.9910909 | 7.26E-34   | 1.15E-31 DOWN   |
| Htr3a     | 1.57077382 | 2.67E-06   | 1.43E-05 UP     |
| Htr3b     | 1.22968273 | 0.04199154 | 0.08058443 UP   |
| Ifngr2    | -1.2967924 | 9.13E-18   | 2.83E-16 DOWN   |
| Il10rb    | -1.2297833 | 5.25E-08   | 3.87E-07 DOWN   |
| Il12rb1   | -1.0980608 | 0.04879207 | 0.09143694 DOWN |
| Il2rb     | 1.39567644 | 5.85E-06   | 2.96E-05 UP     |
| Il18rap   | 1.91974212 | 2.36E-05   | 0.0001057 UP    |
| Il1r1     | 2.94343195 | 5.27E-24   | 3.15E-22 UP     |
| Il1r2     | 4.2910932  | 1.06E-33   | 1.61E-31 UP     |
| Il1rl1    | 1.88319426 | 0.00032609 | 0.00113552 UP   |
| Il20rb    | 1.50684531 | 3.22E-13   | 5.38E-12 UP     |
| Il22ra2   | 1.18516399 | 0.01883047 | 0.04046661 UP   |
| Il23r     | 1.56088061 | 0.00560019 | 0.01404406 UP   |
| Il2ra     | 1.50072032 | 0.0001281  | 0.00049121 UP   |
| Il31ra    | 1.95052037 | 0.02354757 | 0.04903157 UP   |
| Il9r      | -1.3699227 | 0.00472746 | 0.01209114 DOWN |
| Insr      | -1.2317887 | 9.71E-18   | 2.99E-16 DOWN   |
| Ngfr      | 1.51348752 | 5.19E-08   | 3.84E-07 UP     |
| Nr1d1     | -1.4853011 | 7.11E-06   | 3.54E-05 DOWN   |
| Nr1h3     | -1.5085937 | 1.07E-09   | 1.06E-08 DOWN   |

|           |            |            |                 |
|-----------|------------|------------|-----------------|
| Nr1i3     | -1.5332819 | 0.00183982 | 0.00529475 DOWN |
| Nr3c1     | -1.2011314 | 2.65E-14   | 5.20E-13 DOWN   |
| Nr4a1     | 4.53994412 | 6.66E-19   | 2.29E-17 UP     |
| Nr4a2     | 1.74255379 | 1.30E-05   | 6.14E-05 UP     |
| Nr4a3     | 3.96911073 | 4.05E-24   | 2.45E-22 UP     |
| Oprd1     | 1.26309967 | 0.03520458 | 0.06936555 UP   |
| Osmr      | 2.49319263 | 7.39E-30   | 8.07E-28 UP     |
| Pgrmc2    | -1.0646396 | 0.00090161 | 0.00282786 DOWN |
| Prlr      | -1.8101503 | 1.06E-23   | 6.13E-22 DOWN   |
| Ptger2    | 1.0662505  | 0.00491423 | 0.01250468 UP   |
| Rora      | 1.89713005 | 3.09E-12   | 4.54E-11 UP     |
| Rorc      | -1.3224459 | 1.02E-05   | 4.92E-05 DOWN   |
| S1pr1     | 2.93276446 | 4.33E-32   | 5.57E-30 UP     |
| Sdc1      | 1.11516029 | 4.07E-10   | 4.29E-09 UP     |
| Sdc4      | 1.91415693 | 1.76E-11   | 2.32E-10 UP     |
| Sstr5     | -1.2577698 | 0.01591962 | 0.03492159 DOWN |
| Tacr1     | 2.32100778 | 5.07E-08   | 3.75E-07 UP     |
| Tgfbr2    | 1.4596238  | 5.38E-66   | 6.14E-63 UP     |
| Tie1      | 1.33494589 | 4.08E-07   | 2.54E-06 UP     |
| Tnfrsf12a | 4.5504644  | 1.61E-48   | 7.35E-46 UP     |
| Tnfrsf18  | 1.19065811 | 0.00364034 | 0.0096287 UP    |
| Tnfrsf19  | -1.0222224 | 0.00391988 | 0.01028621 DOWN |
| Tnfrsf1b  | 2.30367209 | 1.44E-29   | 1.53E-27 UP     |
| Tnfrsf4   | 1.85720421 | 7.31E-10   | 7.43E-09 UP     |
| Tnfrsf9   | 2.04382428 | 3.88E-05   | 0.00016679 UP   |
| Tshr      | 2.53116751 | 0.00157647 | 0.00462616 UP   |
| Tubb3     | 1.46540676 | 5.65E-07   | 3.43E-06 UP     |
| Vipr1     | -1.1301011 | 1.47E-05   | 6.90E-05 DOWN   |
| Klrc1     | 1.39094219 | 0.02026488 | 0.04316536 UP   |
| Icam1     | 3.28051472 | 1.58E-21   | 7.30E-20 UP     |
| Pik3r2    | -1.1950896 | 5.15E-19   | 1.78E-17 DOWN   |
| Shc2      | 1.04957089 | 0.00310109 | 0.0083604 UP    |
| Shc4      | 1.03192455 | 0.03683182 | 0.07210864 UP   |
| Fos       | 1.05981923 | 0.00724829 | 0.01764994 UP   |
| Nfkbia    | 2.36946252 | 1.80E-20   | 7.38E-19 UP     |
| Nfkbie    | 1.55904593 | 7.96E-08   | 5.67E-07 UP     |
| Cd28      | 1.114039   | 0.00329605 | 0.0088323 UP    |
| Icos      | 2.32711197 | 7.66E-16   | 1.86E-14 UP     |
| Map3k8    | 3.33982323 | 2.52E-25   | 1.69E-23 UP     |
| Map3k14   | 1.06993626 | 8.93E-07   | 5.24E-06 UP     |
| Ctla4     | 5.08359744 | 1.12E-52   | 6.36E-50 UP     |

---

**Table S4 2245 DEGs obtained from the 5 human intestinal I/R injury samples and 5 control samples.**

|              | log2FoldChange | pvalue   | padj     | regulated |
|--------------|----------------|----------|----------|-----------|
| NAMPT        | 4.3337         | 1.49E-32 | 3.65E-28 | up        |
| FOSL1        | 7.1198         | 1.04E-26 | 1.28E-22 | up        |
| IL1RAP       | 2.2960         | 6.64E-23 | 4.07E-19 | up        |
| ARG1         | 4.4361         | 2.13E-22 | 1.04E-18 | up        |
| NR4A3        | 5.7107         | 7.54E-22 | 3.08E-18 | up        |
| NAMPTP1      | 4.1244         | 1.68E-21 | 5.16E-18 | up        |
| PLAUR        | 3.8158         | 1.57E-21 | 5.16E-18 | up        |
| IL1R2        | 5.2641         | 2.31E-21 | 6.29E-18 | up        |
| CD177        | 6.5185         | 8.61E-21 | 2.11E-17 | up        |
| HIF1A        | 2.5263         | 1.80E-20 | 4.01E-17 | up        |
| FABP6        | -11.7706       | 2.15E-20 | 4.39E-17 | down      |
| B4GALT5      | 1.3987         | 3.18E-20 | 6.00E-17 | up        |
| CXCL8        | 7.8820         | 1.50E-19 | 2.63E-16 | up        |
| ABL2         | 2.3757         | 8.24E-19 | 1.26E-15 | up        |
| SBNO2        | 2.2883         | 1.81E-18 | 2.62E-15 | up        |
| LOC100506403 | 3.0293         | 1.77E-17 | 2.41E-14 | up        |
| PUS7         | 1.2371         | 3.83E-17 | 4.95E-14 | up        |
| CXCL3        | 5.3143         | 1.02E-16 | 1.25E-13 | up        |
| ADAMTS4      | 6.4058         | 2.03E-16 | 2.37E-13 | up        |
| PTX3         | 6.0305         | 2.53E-16 | 2.82E-13 | up        |
| TIMP1        | 4.2746         | 2.99E-16 | 3.19E-13 | up        |
| ELL2         | 2.5908         | 4.95E-16 | 5.06E-13 | up        |
| PLK3         | 2.9420         | 8.79E-16 | 8.43E-13 | up        |
| MAP3K5       | 1.1146         | 8.94E-16 | 8.43E-13 | up        |
| PXMP4        | -1.2697        | 1.16E-15 | 1.05E-12 | down      |
| COLCA1       | -2.6777        | 1.29E-15 | 1.12E-12 | down      |
| PTPRE        | 1.5876         | 1.33E-15 | 1.12E-12 | up        |
| PANX1        | 1.9690         | 1.89E-15 | 1.55E-12 | up        |
| UPP1         | 3.0386         | 2.04E-15 | 1.61E-12 | up        |
| C14orf28     | -1.5150        | 3.83E-15 | 2.93E-12 | down      |
| MCEMP1       | 6.9057         | 4.79E-15 | 3.56E-12 | up        |
| TEAD4        | 2.4786         | 8.68E-15 | 6.26E-12 | up        |
| GPR3         | 3.9856         | 1.05E-14 | 7.10E-12 | up        |
| C3orf86      | 4.2552         | 1.07E-14 | 7.10E-12 | up        |
| SOD2         | 3.9183         | 1.03E-14 | 7.10E-12 | up        |

|              |         |          |               |
|--------------|---------|----------|---------------|
| NFIL3        | 2.3462  | 1.35E-14 | 8.71E-12 up   |
| CPO          | -7.5957 | 2.16E-14 | 1.36E-11 down |
| SERPINE1     | 6.2407  | 5.72E-14 | 3.51E-11 up   |
| DDX21        | 2.2459  | 7.02E-14 | 4.10E-11 up   |
| EIF4A1       | 2.0731  | 6.86E-14 | 4.10E-11 up   |
| MCL1         | 1.9555  | 7.27E-14 | 4.14E-11 up   |
| CSRNP1       | 2.5193  | 9.94E-14 | 5.54E-11 up   |
| EIF4A1P10    | 1.8757  | 1.30E-13 | 6.94E-11 up   |
| ZNF345       | -1.4030 | 1.30E-13 | 6.94E-11 down |
| ECHDC2       | -1.8502 | 2.92E-13 | 1.49E-10 down |
| PLAU         | 3.0182  | 3.13E-13 | 1.56E-10 up   |
| SLC2A3       | 3.2707  | 3.51E-13 | 1.72E-10 up   |
| CIRBP        | -1.2070 | 3.64E-13 | 1.75E-10 down |
| LIF          | 5.1461  | 5.57E-13 | 2.63E-10 up   |
| RPL22L1      | 1.8910  | 6.39E-13 | 2.96E-10 up   |
| ZER1         | -1.1987 | 7.02E-13 | 3.19E-10 down |
| CSF3         | 7.6541  | 7.27E-13 | 3.24E-10 up   |
| SLC38A2      | 1.5758  | 8.87E-13 | 3.88E-10 up   |
| LINC01089    | -1.7616 | 1.29E-12 | 5.55E-10 down |
| ADGRG3       | 3.0901  | 1.84E-12 | 7.79E-10 up   |
| TUBB3        | 2.9723  | 1.96E-12 | 8.03E-10 up   |
| HRH2         | 2.9904  | 2.00E-12 | 8.04E-10 up   |
| DBP          | -2.4706 | 2.24E-12 | 8.85E-10 down |
| PDE4B        | 2.3914  | 3.72E-12 | 1.45E-09 up   |
| S100A3       | 2.2545  | 3.80E-12 | 1.46E-09 up   |
| GNL3         | 1.6876  | 4.18E-12 | 1.58E-09 up   |
| SLC5A12      | -9.3622 | 4.88E-12 | 1.81E-09 down |
| NFKBIZ       | 2.4035  | 6.18E-12 | 2.26E-09 up   |
| RRP12        | 2.0643  | 6.43E-12 | 2.32E-09 up   |
| LOC101928674 | 4.2613  | 7.13E-12 | 2.53E-09 up   |
| SNHG15       | 2.0724  | 8.67E-12 | 2.99E-09 up   |
| ACSL4        | 2.3092  | 8.61E-12 | 2.99E-09 up   |
| MAD2L2       | 1.5270  | 9.40E-12 | 3.20E-09 up   |
| IL6          | 5.7008  | 1.12E-11 | 3.77E-09 up   |
| ITPRIP       | 3.0823  | 1.39E-11 | 4.60E-09 up   |
| CCDC71L      | 3.0663  | 1.48E-11 | 4.83E-09 up   |
| LINC00954    | -2.0720 | 1.50E-11 | 4.84E-09 down |
| ZNF606       | -1.1946 | 1.59E-11 | 5.06E-09 down |
| GRWD1        | 1.0972  | 1.79E-11 | 5.62E-09 up   |
| ING4         | -1.2100 | 1.97E-11 | 6.11E-09 down |
| EIF4A3       | 1.2792  | 2.42E-11 | 7.43E-09 up   |



|           |         |          |               |
|-----------|---------|----------|---------------|
| TMEM165   | 1.4024  | 2.66E-11 | 8.06E-09 up   |
| PVR       | 1.7550  | 2.71E-11 | 8.11E-09 up   |
| PHLDA1    | 3.0562  | 3.14E-11 | 9.28E-09 up   |
| ICAM1     | 4.2061  | 3.51E-11 | 1.02E-08 up   |
| OSM       | 4.3572  | 3.73E-11 | 1.08E-08 up   |
| CEMIP     | 4.7917  | 4.51E-11 | 1.27E-08 up   |
| IL1B      | 5.2089  | 5.10E-11 | 1.42E-08 up   |
| SH2B1     | -1.1155 | 6.44E-11 | 1.78E-08 down |
| MPZL2     | 2.4074  | 6.80E-11 | 1.85E-08 up   |
| LOC91370  | 4.0297  | 7.80E-11 | 2.10E-08 up   |
| CCL2      | 4.6146  | 1.03E-10 | 2.75E-08 up   |
| SELE      | 6.2021  | 1.08E-10 | 2.82E-08 up   |
| DYRK3     | 2.8630  | 1.07E-10 | 2.82E-08 up   |
| PPP1R3E   | -1.7962 | 1.09E-10 | 2.82E-08 down |
| FAM20C    | 1.6272  | 1.13E-10 | 2.89E-08 up   |
| SERPINB2  | 6.6938  | 1.17E-10 | 2.92E-08 up   |
| PPIF      | 1.4446  | 1.40E-10 | 3.47E-08 up   |
| MYC       | 2.7522  | 1.44E-10 | 3.53E-08 up   |
| SLED1     | 4.7376  | 1.49E-10 | 3.63E-08 up   |
| NOP16     | 1.6784  | 2.26E-10 | 5.36E-08 up   |
| TEX26-AS1 | 3.6197  | 2.30E-10 | 5.36E-08 up   |
| LOC388813 | 2.5584  | 2.29E-10 | 5.36E-08 up   |
| SDE2      | 1.2306  | 2.35E-10 | 5.45E-08 up   |
| DUSP4     | 2.9447  | 2.67E-10 | 6.11E-08 up   |
| MAP3K8    | 2.8058  | 2.88E-10 | 6.49E-08 up   |
| HOXB7     | -1.8748 | 2.99E-10 | 6.68E-08 down |
| PHC2      | 1.8281  | 3.11E-10 | 6.88E-08 up   |
| IER3      | 3.7008  | 3.21E-10 | 7.03E-08 up   |
| LIPN      | 4.2482  | 3.24E-10 | 7.03E-08 up   |
| CHSY1     | 2.2890  | 3.30E-10 | 7.11E-08 up   |
| THBS1     | 3.9364  | 3.52E-10 | 7.51E-08 up   |
| S100A8    | 6.2247  | 4.21E-10 | 8.78E-08 up   |
| KLHL33    | -4.1548 | 4.22E-10 | 8.78E-08 down |
| IL1RL2    | 2.7381  | 4.74E-10 | 9.68E-08 up   |
| FTSJ1     | 1.1056  | 4.78E-10 | 9.68E-08 up   |
| PROCR     | 1.6222  | 4.90E-10 | 9.86E-08 up   |
| PPRC1     | 2.0105  | 5.01E-10 | 9.99E-08 up   |
| TNFAIP3   | 2.9043  | 5.98E-10 | 1.17E-07 up   |
| RCAN1     | 2.6331  | 6.06E-10 | 1.18E-07 up   |
| NOP56     | 1.1266  | 6.62E-10 | 1.28E-07 up   |
| SRPRB     | 1.1105  | 7.64E-10 | 1.45E-07 up   |

|              |         |          |               |
|--------------|---------|----------|---------------|
| HOXA-AS3     | -2.4937 | 7.60E-10 | 1.45E-07 down |
| PPP1R15B     | 1.2593  | 8.13E-10 | 1.52E-07 up   |
| TCEA3        | -2.4400 | 8.72E-10 | 1.62E-07 down |
| RNF24        | 2.3766  | 9.29E-10 | 1.71E-07 up   |
| MTHFD1L      | 1.9098  | 1.03E-09 | 1.88E-07 up   |
| IL18R1       | 2.0821  | 1.07E-09 | 1.92E-07 up   |
| PDPN         | 3.1506  | 1.13E-09 | 2.02E-07 up   |
| CXCL2        | 3.8701  | 1.47E-09 | 2.61E-07 up   |
| RLIM         | 1.0705  | 1.49E-09 | 2.61E-07 up   |
| CDHR1        | -6.8186 | 1.48E-09 | 2.61E-07 down |
| ALPL         | 4.4630  | 1.52E-09 | 2.62E-07 up   |
| BDKRB1       | 3.7955  | 1.51E-09 | 2.62E-07 up   |
| KCNJ13       | -6.9406 | 1.64E-09 | 2.82E-07 down |
| EIF4A1P7     | 1.7517  | 1.76E-09 | 2.99E-07 up   |
| NOLC1        | 1.5976  | 1.79E-09 | 3.03E-07 up   |
| LOC220729    | -1.3009 | 1.91E-09 | 3.20E-07 down |
| IL17RC       | -1.2305 | 1.95E-09 | 3.22E-07 down |
| CH25H        | 3.7979  | 1.94E-09 | 3.22E-07 up   |
| PIGA         | 1.8338  | 1.98E-09 | 3.25E-07 up   |
| RTP4         | -1.8174 | 2.02E-09 | 3.30E-07 down |
| HSPA6        | 6.6021  | 2.13E-09 | 3.46E-07 up   |
| RN7SL368P    | 3.2342  | 2.19E-09 | 3.51E-07 up   |
| IL1RL1       | 6.3236  | 2.33E-09 | 3.71E-07 up   |
| SLC34A3      | -6.9680 | 2.65E-09 | 4.16E-07 down |
| GTPBP4       | 1.5402  | 2.94E-09 | 4.57E-07 up   |
| HAS1         | 5.5429  | 2.95E-09 | 4.57E-07 up   |
| ANKMY2       | -1.0846 | 3.06E-09 | 4.71E-07 down |
| S100A9       | 5.8742  | 3.43E-09 | 5.25E-07 up   |
| C11orf96     | 3.5421  | 3.72E-09 | 5.66E-07 up   |
| CBARP        | 3.2591  | 3.77E-09 | 5.70E-07 up   |
| PLEKHG2      | 1.7697  | 4.32E-09 | 6.41E-07 up   |
| INHBA        | 6.1003  | 4.37E-09 | 6.45E-07 up   |
| P4HA1        | 2.0214  | 4.54E-09 | 6.66E-07 up   |
| TFDP2        | -1.4301 | 4.68E-09 | 6.75E-07 down |
| TMEM80       | -1.4563 | 4.74E-09 | 6.75E-07 down |
| HMOX1        | 3.0108  | 4.74E-09 | 6.75E-07 up   |
| PDCD11       | 1.1343  | 5.04E-09 | 7.14E-07 up   |
| LOC101927837 | -2.5533 | 5.18E-09 | 7.30E-07 down |
| SLC23A1      | -5.8394 | 5.45E-09 | 7.64E-07 down |
| TPBG         | 1.3129  | 5.91E-09 | 8.22E-07 up   |
| HOXA9        | -3.9383 | 5.94E-09 | 8.22E-07 down |

|              |         |          |               |
|--------------|---------|----------|---------------|
| TSC22D1-AS1  | -3.0716 | 6.05E-09 | 8.33E-07 down |
| H3-5         | 1.3637  | 6.23E-09 | 8.54E-07 up   |
| OSMR         | 2.6402  | 6.97E-09 | 9.50E-07 up   |
| BHLHE40      | 2.2986  | 7.29E-09 | 9.88E-07 up   |
| EIF4E3       | -1.2141 | 7.60E-09 | 1.02E-06 down |
| BYSL         | 1.6934  | 8.41E-09 | 1.13E-06 up   |
| TMEM70       | 1.3486  | 8.62E-09 | 1.14E-06 up   |
| SLC7A9       | -6.7422 | 8.89E-09 | 1.16E-06 down |
| STC1         | 4.0874  | 9.16E-09 | 1.17E-06 up   |
| ZNF540       | -2.2274 | 9.06E-09 | 1.17E-06 down |
| ABCE1        | 1.2725  | 9.54E-09 | 1.20E-06 up   |
| RNF122       | 2.0785  | 9.56E-09 | 1.20E-06 up   |
| PNO1         | 1.6997  | 9.75E-09 | 1.21E-06 up   |
| BZW1         | 1.0876  | 9.77E-09 | 1.21E-06 up   |
| MATN2        | -2.5067 | 9.68E-09 | 1.21E-06 down |
| ERFE         | 4.5828  | 9.90E-09 | 1.22E-06 up   |
| C11orf91     | 4.9198  | 1.04E-08 | 1.27E-06 up   |
| LOC105370854 | -4.3074 | 1.04E-08 | 1.27E-06 down |
| ADAMTS9      | 4.4463  | 1.06E-08 | 1.28E-06 up   |
| HSPA5        | 1.9688  | 1.14E-08 | 1.36E-06 up   |
| NPM3         | 1.3328  | 1.18E-08 | 1.40E-06 up   |
| EREG         | 4.0399  | 1.23E-08 | 1.44E-06 up   |
| WDR43        | 1.4439  | 1.29E-08 | 1.50E-06 up   |
| SNAPC1       | 1.3103  | 1.32E-08 | 1.52E-06 up   |
| PTPN1        | 1.2831  | 1.34E-08 | 1.54E-06 up   |
| TCEANC       | -1.4421 | 1.36E-08 | 1.55E-06 down |
| HMGXB3       | 1.0335  | 1.40E-08 | 1.59E-06 up   |
| FUT11        | 1.0342  | 1.41E-08 | 1.59E-06 up   |
| CDKN2B-AS1   | -5.1531 | 1.46E-08 | 1.64E-06 down |
| HEYL         | 3.0789  | 1.53E-08 | 1.72E-06 up   |
| CHST2        | 1.8627  | 1.58E-08 | 1.75E-06 up   |
| SERTAD1      | 1.8390  | 1.57E-08 | 1.75E-06 up   |
| RND3         | 2.5014  | 1.60E-08 | 1.76E-06 up   |
| NOP2         | 1.7830  | 1.89E-08 | 2.06E-06 up   |
| TLR2         | 2.8602  | 1.91E-08 | 2.08E-06 up   |
| ARID5B       | 1.8437  | 1.97E-08 | 2.12E-06 up   |
| C9orf72      | 1.4426  | 2.00E-08 | 2.14E-06 up   |
| FJX1         | 3.4371  | 2.00E-08 | 2.14E-06 up   |
| PADI4        | 4.0269  | 2.04E-08 | 2.15E-06 up   |
| IL11RA       | -1.5297 | 2.04E-08 | 2.15E-06 down |
| EIF5A        | 1.1016  | 2.04E-08 | 2.15E-06 up   |

|              |         |          |               |
|--------------|---------|----------|---------------|
| TPM4         | 1.5747  | 2.14E-08 | 2.25E-06 up   |
| CCN1         | 3.2577  | 2.23E-08 | 2.34E-06 up   |
| CLCF1        | 3.5169  | 2.30E-08 | 2.40E-06 up   |
| ACBD4        | -2.3194 | 2.31E-08 | 2.40E-06 down |
| ELK1         | 1.0624  | 2.34E-08 | 2.41E-06 up   |
| SRGN         | 2.4769  | 2.34E-08 | 2.41E-06 up   |
| HAS2         | 4.3169  | 2.35E-08 | 2.41E-06 up   |
| ALDH1A1      | -1.9386 | 2.68E-08 | 2.72E-06 down |
| AREG         | 4.3830  | 2.74E-08 | 2.76E-06 up   |
| FSIP2        | -4.5791 | 3.46E-08 | 3.44E-06 down |
| CDC42SE1     | 1.1319  | 3.68E-08 | 3.63E-06 up   |
| TREM1        | 4.9510  | 3.73E-08 | 3.66E-06 up   |
| LOC100506289 | -3.0935 | 3.79E-08 | 3.68E-06 down |
| FOLR3        | 7.8897  | 3.79E-08 | 3.68E-06 up   |
| SLC17A8      | -7.3837 | 3.81E-08 | 3.69E-06 down |
| PGF          | 3.2700  | 3.93E-08 | 3.78E-06 up   |
| GALT         | -1.4621 | 3.97E-08 | 3.80E-06 down |
| KAT14        | -1.4616 | 4.04E-08 | 3.86E-06 down |
| NAALADL1     | -4.7407 | 4.21E-08 | 3.99E-06 down |
| PHEX         | -4.6384 | 4.30E-08 | 4.04E-06 down |
| IL11         | 6.3573  | 4.30E-08 | 4.04E-06 up   |
| SPHK1        | 2.7782  | 4.50E-08 | 4.21E-06 up   |
| GPAT2        | 2.3952  | 4.58E-08 | 4.27E-06 up   |
| HSD17B8      | -1.7611 | 4.73E-08 | 4.39E-06 down |
| SERPINF2     | 1.7393  | 4.94E-08 | 4.54E-06 up   |
| ATF3         | 2.1314  | 5.03E-08 | 4.55E-06 up   |
| ZDHHC19      | 3.6204  | 5.01E-08 | 4.55E-06 up   |
| C8orf44      | -1.3075 | 5.03E-08 | 4.55E-06 down |
| TMEM252      | -4.7958 | 4.98E-08 | 4.55E-06 down |
| KLHDC9       | -2.5486 | 5.20E-08 | 4.65E-06 down |
| NIP7         | 1.1744  | 5.19E-08 | 4.65E-06 up   |
| TRIB1        | 2.3836  | 5.24E-08 | 4.67E-06 up   |
| HBEGF        | 2.7514  | 5.36E-08 | 4.76E-06 up   |
| YRDC         | 1.6208  | 5.49E-08 | 4.84E-06 up   |
| IRAK3        | 2.3617  | 5.48E-08 | 4.84E-06 up   |
| CXCL1        | 5.1950  | 5.62E-08 | 4.94E-06 up   |
| FAM200B      | -1.0602 | 5.96E-08 | 5.22E-06 down |
| KLHDC2       | -1.0305 | 6.02E-08 | 5.25E-06 down |
| TM4SF1       | 2.8853  | 6.37E-08 | 5.48E-06 up   |
| ATP13A3      | 1.6075  | 6.33E-08 | 5.48E-06 up   |
| EGR3         | 3.3597  | 6.37E-08 | 5.48E-06 up   |

|              |         |          |               |
|--------------|---------|----------|---------------|
| ELL          | 1.3500  | 6.40E-08 | 5.49E-06 up   |
| SLC25A23     | -2.0380 | 6.43E-08 | 5.49E-06 down |
| CHAD         | -4.8344 | 6.64E-08 | 5.65E-06 down |
| PPP1R15A     | 2.9673  | 6.76E-08 | 5.73E-06 up   |
| LOC171391    | -1.8566 | 6.79E-08 | 5.74E-06 down |
| ABCG2        | -4.8913 | 6.93E-08 | 5.84E-06 down |
| SULT1A2      | -5.2029 | 7.54E-08 | 6.33E-06 down |
| PUM3         | 1.4182  | 7.61E-08 | 6.37E-06 up   |
| RHOQ-AS1     | 2.5302  | 8.11E-08 | 6.75E-06 up   |
| GRAMD1A      | 1.6414  | 8.25E-08 | 6.83E-06 up   |
| CCDC146      | -1.6199 | 8.38E-08 | 6.91E-06 down |
| CCL3         | 3.2713  | 8.83E-08 | 7.24E-06 up   |
| LOC102724788 | -5.4835 | 8.94E-08 | 7.31E-06 down |
| MTHFD2       | 2.2239  | 9.00E-08 | 7.33E-06 up   |
| PTGES        | 2.7933  | 9.24E-08 | 7.50E-06 up   |
| CYTOR        | 2.2832  | 9.32E-08 | 7.54E-06 up   |
| S100A12      | 6.7530  | 1.09E-07 | 8.70E-06 up   |
| ATP11A       | 1.0816  | 1.11E-07 | 8.80E-06 up   |
| GUCA2B       | -7.7920 | 1.11E-07 | 8.81E-06 down |
| FAM151A      | -6.3834 | 1.14E-07 | 8.98E-06 down |
| CLK4         | -1.1267 | 1.17E-07 | 9.21E-06 down |
| NUP58        | 1.1255  | 1.18E-07 | 9.21E-06 up   |
| CD44         | 1.7191  | 1.19E-07 | 9.29E-06 up   |
| NNMT         | 3.4052  | 1.22E-07 | 9.48E-06 up   |
| CUBN         | -6.0892 | 1.22E-07 | 9.48E-06 down |
| TNFAIP6      | 4.2399  | 1.25E-07 | 9.68E-06 up   |
| SLCO4A1      | 2.5885  | 1.34E-07 | 1.03E-05 up   |
| SLC10A2      | -8.2616 | 1.36E-07 | 1.05E-05 down |
| CSGALNACT2   | 1.5900  | 1.39E-07 | 1.06E-05 up   |
| LOC100419170 | 4.3472  | 1.43E-07 | 1.09E-05 up   |
| ZNF121       | 1.0115  | 1.47E-07 | 1.11E-05 up   |
| ZBTB21       | 1.4913  | 1.47E-07 | 1.11E-05 up   |
| ZNF436-AS1   | -2.3430 | 1.51E-07 | 1.13E-05 down |
| LOC100134368 | -2.1428 | 1.50E-07 | 1.13E-05 down |
| ATG101       | 1.1495  | 1.54E-07 | 1.15E-05 up   |
| CEBPB        | 2.2712  | 1.57E-07 | 1.17E-05 up   |
| CDHR3        | -3.5203 | 1.60E-07 | 1.18E-05 down |
| PAPPA        | 2.0961  | 1.68E-07 | 1.24E-05 up   |
| ZNF599       | -1.0949 | 1.69E-07 | 1.24E-05 down |
| NME1         | 1.6698  | 1.76E-07 | 1.29E-05 up   |
| SH3TC1       | 1.8476  | 1.80E-07 | 1.31E-05 up   |

|              |         |          |               |
|--------------|---------|----------|---------------|
| GPR84        | 5.2385  | 1.80E-07 | 1.31E-05 up   |
| THBD         | 2.8975  | 1.81E-07 | 1.31E-05 up   |
| FCER1A       | -3.4107 | 1.84E-07 | 1.32E-05 down |
| ADD3-AS1     | -2.7388 | 1.88E-07 | 1.35E-05 down |
| LHPP         | -1.6889 | 1.96E-07 | 1.39E-05 down |
| LINC01011    | -1.4133 | 1.98E-07 | 1.40E-05 down |
| PTPRVP       | -4.5834 | 2.16E-07 | 1.53E-05 down |
| MYBPC3       | 2.4873  | 2.21E-07 | 1.56E-05 up   |
| EAF1         | 1.2655  | 2.23E-07 | 1.57E-05 up   |
| KY           | -4.9391 | 2.29E-07 | 1.61E-05 down |
| ARC          | 5.1021  | 2.35E-07 | 1.64E-05 up   |
| LOC100130111 | -6.3822 | 2.36E-07 | 1.64E-05 down |
| INO80E       | -1.0618 | 2.34E-07 | 1.64E-05 down |
| DDX60        | -1.3099 | 2.39E-07 | 1.65E-05 down |
| IFITM2       | 2.2252  | 2.38E-07 | 1.65E-05 up   |
| GVQW3        | -2.0205 | 2.44E-07 | 1.68E-05 down |
| FCAR         | 5.0834  | 2.45E-07 | 1.68E-05 up   |
| MAFF         | 3.0177  | 2.44E-07 | 1.68E-05 up   |
| CFAP45       | 3.5338  | 2.47E-07 | 1.69E-05 up   |
| IL24         | 6.9909  | 2.48E-07 | 1.69E-05 up   |
| H3-3B        | 1.2160  | 2.51E-07 | 1.70E-05 up   |
| SEH1L        | 1.1070  | 2.53E-07 | 1.71E-05 up   |
| TNFRSF12A    | 3.1700  | 2.60E-07 | 1.75E-05 up   |
| DCUN1D3      | 1.9827  | 2.61E-07 | 1.75E-05 up   |
| CYP2U1       | -1.3115 | 2.69E-07 | 1.80E-05 down |
| MYORG        | -2.3941 | 2.74E-07 | 1.81E-05 down |
| SERPINH1     | 3.2566  | 2.75E-07 | 1.81E-05 up   |
| URB2         | 1.5323  | 2.79E-07 | 1.84E-05 up   |
| DNASE1       | -3.7959 | 2.90E-07 | 1.90E-05 down |
| SLC19A2      | 1.9557  | 3.08E-07 | 2.00E-05 up   |
| LILRA5       | 4.1666  | 3.07E-07 | 2.00E-05 up   |
| RGS16        | 4.2173  | 3.10E-07 | 2.00E-05 up   |
| HSP90B2P     | 1.4035  | 3.14E-07 | 2.03E-05 up   |
| DET1         | -1.8157 | 3.20E-07 | 2.05E-05 down |
| SIGLEC17P    | -1.8468 | 3.24E-07 | 2.07E-05 down |
| MB           | -3.3835 | 3.26E-07 | 2.07E-05 down |
| GLIS3        | 1.8579  | 3.42E-07 | 2.17E-05 up   |
| XIRP1        | 6.1239  | 3.43E-07 | 2.17E-05 up   |
| ZNF281       | 1.3727  | 3.49E-07 | 2.21E-05 up   |
| BATF3        | 2.0536  | 3.77E-07 | 2.37E-05 up   |
| SLC25A25     | 2.0149  | 3.86E-07 | 2.40E-05 up   |

|              |         |          |               |
|--------------|---------|----------|---------------|
| FAXDC2       | -2.2388 | 3.95E-07 | 2.44E-05 down |
| ZNF780B      | -1.3480 | 3.94E-07 | 2.44E-05 down |
| SLC7A5       | 3.5058  | 3.99E-07 | 2.47E-05 up   |
| HOXC-AS2     | -4.3548 | 4.12E-07 | 2.54E-05 down |
| FAM126A      | 1.1500  | 4.14E-07 | 2.55E-05 up   |
| TGIF1        | 2.1817  | 4.19E-07 | 2.57E-05 up   |
| RNASE2       | 5.4203  | 4.25E-07 | 2.60E-05 up   |
| FPR1         | 4.4619  | 4.32E-07 | 2.64E-05 up   |
| SLC28A1      | -5.5422 | 4.50E-07 | 2.73E-05 down |
| DKC1         | 1.0305  | 4.57E-07 | 2.77E-05 up   |
| HOXC-AS1     | -4.5649 | 4.60E-07 | 2.78E-05 down |
| SLC26A3      | -6.4467 | 4.64E-07 | 2.80E-05 down |
| WEE2-AS1     | -1.4901 | 4.70E-07 | 2.83E-05 down |
| SLC11A1      | 4.6301  | 4.73E-07 | 2.84E-05 up   |
| ITPKC        | 1.8454  | 4.78E-07 | 2.86E-05 up   |
| CAMK2G       | -2.1489 | 4.88E-07 | 2.91E-05 down |
| SERPINE2     | 2.6132  | 4.95E-07 | 2.94E-05 up   |
| PLK2         | 1.6201  | 4.99E-07 | 2.95E-05 up   |
| DAB1         | -4.9544 | 5.01E-07 | 2.96E-05 down |
| SAP30L       | -1.1597 | 5.07E-07 | 2.98E-05 down |
| RAB3C        | 1.3236  | 5.12E-07 | 3.00E-05 up   |
| ZNF19        | -1.4870 | 5.48E-07 | 3.18E-05 down |
| MEDAG        | 3.7394  | 5.51E-07 | 3.19E-05 up   |
| IKBIP        | 1.7918  | 5.62E-07 | 3.24E-05 up   |
| SERPINB8     | 1.7537  | 5.84E-07 | 3.36E-05 up   |
| TNFAIP1      | 1.1261  | 5.88E-07 | 3.38E-05 up   |
| RIPK2        | 1.7986  | 5.99E-07 | 3.42E-05 up   |
| ARID5A       | 2.0781  | 6.29E-07 | 3.56E-05 up   |
| EPOP         | 3.1905  | 6.29E-07 | 3.56E-05 up   |
| FPR2         | 4.2210  | 6.34E-07 | 3.58E-05 up   |
| POLA2        | 3.5808  | 6.87E-07 | 3.87E-05 up   |
| PTGIR        | 2.6388  | 6.97E-07 | 3.91E-05 up   |
| KLC4         | -2.1999 | 7.17E-07 | 4.01E-05 down |
| RRP9         | 1.1664  | 7.19E-07 | 4.02E-05 up   |
| BTBD19       | 2.0877  | 7.49E-07 | 4.16E-05 up   |
| SRGAP1       | 1.0652  | 7.71E-07 | 4.26E-05 up   |
| ADAMTSL4-AS1 | 3.2687  | 8.09E-07 | 4.46E-05 up   |
| PAXIP1-DT    | -1.3030 | 8.19E-07 | 4.49E-05 down |
| SOCS3        | 3.2166  | 8.21E-07 | 4.49E-05 up   |
| CNGA1        | -4.1418 | 8.37E-07 | 4.56E-05 down |
| PROK2        | 3.7293  | 8.53E-07 | 4.63E-05 up   |

|              |         |          |               |
|--------------|---------|----------|---------------|
| DHRS1        | -1.9636 | 8.51E-07 | 4.63E-05 down |
| SNAI1        | 3.4061  | 8.67E-07 | 4.69E-05 up   |
| TDRD9        | 2.4462  | 8.70E-07 | 4.70E-05 up   |
| ADAM17       | 1.1469  | 9.30E-07 | 4.98E-05 up   |
| SPRY4        | 1.7701  | 9.32E-07 | 4.98E-05 up   |
| ENPP3        | -5.6074 | 9.34E-07 | 4.98E-05 down |
| UGCG         | 1.7220  | 9.33E-07 | 4.98E-05 up   |
| DRAM1        | 2.1709  | 9.38E-07 | 4.99E-05 up   |
| CLEC5A       | 5.2370  | 9.47E-07 | 5.03E-05 up   |
| PAK1IP1      | 1.3415  | 9.54E-07 | 5.05E-05 up   |
| TMEM161B-AS1 | -2.4267 | 9.80E-07 | 5.18E-05 down |
| SPTBN5       | 2.2352  | 1.02E-06 | 5.40E-05 up   |
| ZNF737       | -1.0778 | 1.04E-06 | 5.45E-05 down |
| TTC30B       | -1.3754 | 1.04E-06 | 5.48E-05 down |
| C2orf88      | -3.2886 | 1.06E-06 | 5.54E-05 down |
| TNFRSF10D    | 2.3545  | 1.08E-06 | 5.63E-05 up   |
| SLC6A4       | -5.4714 | 1.11E-06 | 5.79E-05 down |
| SHC1         | 1.2595  | 1.12E-06 | 5.81E-05 up   |
| ASGR1        | 2.1864  | 1.12E-06 | 5.81E-05 up   |
| FBXW4        | -1.0044 | 1.12E-06 | 5.81E-05 down |
| GLT1D1       | 3.1523  | 1.13E-06 | 5.83E-05 up   |
| SCIN         | -5.3551 | 1.14E-06 | 5.86E-05 down |
| AGTRAP       | 1.8463  | 1.18E-06 | 6.07E-05 up   |
| KAZALD1      | -2.7461 | 1.18E-06 | 6.07E-05 down |
| RAN          | 1.0398  | 1.19E-06 | 6.09E-05 up   |
| CRISPLD2     | 2.7249  | 1.21E-06 | 6.19E-05 up   |
| FAM167B      | 2.0653  | 1.24E-06 | 6.32E-05 up   |
| ADH4         | 5.2873  | 1.26E-06 | 6.37E-05 up   |
| MIEF2        | -1.3325 | 1.31E-06 | 6.59E-05 down |
| EIF5AL1      | 1.3474  | 1.33E-06 | 6.65E-05 up   |
| MRPL17       | 1.0543  | 1.34E-06 | 6.72E-05 up   |
| NOL12        | -1.2426 | 1.35E-06 | 6.73E-05 down |
| ACKR3        | 2.3477  | 1.38E-06 | 6.90E-05 up   |
| RND1         | 4.9179  | 1.40E-06 | 6.98E-05 up   |
| HOXC10       | -3.6441 | 1.41E-06 | 6.99E-05 down |
| POLR1C       | 1.3383  | 1.41E-06 | 7.01E-05 up   |
| PNP          | 2.4652  | 1.43E-06 | 7.06E-05 up   |
| EIF4A1P2     | 2.0918  | 1.43E-06 | 7.06E-05 up   |
| NUDT12       | -1.2872 | 1.44E-06 | 7.08E-05 down |
| ZNF252P-AS1  | -2.7387 | 1.47E-06 | 7.20E-05 down |
| E2F3         | 1.3552  | 1.50E-06 | 7.34E-05 up   |



|              |         |          |                 |
|--------------|---------|----------|-----------------|
| FBXL22       | -4.1552 | 1.52E-06 | 7.39E-05 down   |
| OSGEPL1      | -1.2374 | 1.53E-06 | 7.46E-05 down   |
| GRHL1        | 2.8785  | 1.58E-06 | 7.69E-05 up     |
| ZFP14        | -1.6968 | 1.59E-06 | 7.71E-05 down   |
| RPL32P32     | 2.4307  | 1.65E-06 | 7.95E-05 up     |
| NXT1         | 1.4734  | 1.67E-06 | 8.04E-05 up     |
| LOC100287896 | -1.4575 | 1.71E-06 | 8.19E-05 down   |
| USP31        | 1.1798  | 1.76E-06 | 8.42E-05 up     |
| ACE2         | -5.6182 | 1.78E-06 | 8.51E-05 down   |
| LIN7B        | -1.3316 | 1.81E-06 | 8.60E-05 down   |
| ASXL3        | -1.6670 | 1.82E-06 | 8.65E-05 down   |
| NUDCD1       | 1.1573  | 1.84E-06 | 8.72E-05 up     |
| EGR4         | 4.2977  | 1.86E-06 | 8.79E-05 up     |
| SERTAD4      | -2.6958 | 1.87E-06 | 8.81E-05 down   |
| MTHFD2P7     | 2.2190  | 1.88E-06 | 8.81E-05 up     |
| HLF          | -2.8438 | 1.88E-06 | 8.81E-05 down   |
| ZNF460       | 1.7937  | 1.88E-06 | 8.81E-05 up     |
| FKBP1A       | 1.2682  | 1.93E-06 | 9.03E-05 up     |
| METTL1       | 1.7398  | 2.00E-06 | 9.32E-05 up     |
| JUNB         | 1.7304  | 2.01E-06 | 9.34E-05 up     |
| PGLYRP1      | 4.2696  | 2.11E-06 | 9.76E-05 up     |
| HYOU1        | 1.3855  | 2.15E-06 | 9.95E-05 up     |
| BCL6B        | 2.6995  | 2.21E-06 | 0.00010197 up   |
| SNHG16       | 1.4487  | 2.22E-06 | 0.00010228 up   |
| LRRC59       | 1.3001  | 2.28E-06 | 0.00010447 up   |
| HOXB6        | -1.3585 | 2.29E-06 | 0.00010475 down |
| MAPKAPK2     | 1.1846  | 2.37E-06 | 0.00010805 up   |
| STX18-AS1    | -1.2225 | 2.40E-06 | 0.00010913 down |
| NCOA7        | 1.7219  | 2.43E-06 | 0.00011028 up   |
| RELT         | 2.2202  | 2.45E-06 | 0.00011086 up   |
| SNHG17       | 1.4436  | 2.45E-06 | 0.00011086 up   |
| ACKR4        | -2.2022 | 2.47E-06 | 0.00011151 down |
| HOXA7        | -1.9097 | 2.55E-06 | 0.0001151 down  |
| NR4A2        | 2.7533  | 2.62E-06 | 0.00011789 up   |
| ETF1         | 1.2155  | 2.66E-06 | 0.00011909 up   |
| LRRC19       | -5.3561 | 2.67E-06 | 0.00011932 down |
| RAB13        | 1.5116  | 2.72E-06 | 0.00012112 up   |
| C11orf54     | -1.5590 | 2.72E-06 | 0.00012112 down |
| SOAT2        | -4.9252 | 2.72E-06 | 0.00012112 down |
| MMP1         | 7.4673  | 2.78E-06 | 0.00012314 up   |
| HDAC11       | -1.2989 | 2.82E-06 | 0.00012439 down |

|              |         |          |                 |
|--------------|---------|----------|-----------------|
| RNF149       | 1.3605  | 2.84E-06 | 0.0001251 up    |
| TMEM158      | 3.6406  | 2.91E-06 | 0.00012808 up   |
| MCHR1        | 2.5021  | 2.91E-06 | 0.00012808 up   |
| GPR4         | 3.5740  | 2.93E-06 | 0.00012845 up   |
| LOC107987479 | -4.5771 | 2.94E-06 | 0.00012845 down |
| WTAP         | 1.4227  | 2.94E-06 | 0.00012848 up   |
| LITAF        | 1.6376  | 3.04E-06 | 0.00013224 up   |
| GNL2         | 1.2889  | 3.07E-06 | 0.00013349 up   |
| CARF         | -1.3884 | 3.09E-06 | 0.00013389 down |
| RIOK1        | 1.1779  | 3.13E-06 | 0.00013445 up   |
| FAM71F2      | 1.6596  | 3.13E-06 | 0.00013445 up   |
| B4GALT1      | 1.6240  | 3.12E-06 | 0.00013445 up   |
| KDM6B        | 1.7856  | 3.14E-06 | 0.00013445 up   |
| DPF3         | -2.0469 | 3.16E-06 | 0.00013542 down |
| STPG3-AS1    | -4.0081 | 3.18E-06 | 0.00013556 down |
| SMOX         | 1.9859  | 3.18E-06 | 0.00013556 up   |
| SPAG8        | -2.2542 | 3.19E-06 | 0.00013564 down |
| PDZD7        | -3.4792 | 3.19E-06 | 0.00013564 down |
| TMED9        | 1.0338  | 3.24E-06 | 0.00013721 up   |
| NAPEPLD      | -2.0313 | 3.26E-06 | 0.00013778 down |
| SLC9A3       | -4.3356 | 3.30E-06 | 0.00013939 down |
| CHIC2        | 1.2403  | 3.40E-06 | 0.00014263 up   |
| SBK3         | 3.7008  | 3.46E-06 | 0.00014509 up   |
| APLN         | 3.6892  | 3.51E-06 | 0.00014643 up   |
| SH3RF3       | 1.4535  | 3.53E-06 | 0.00014709 up   |
| TUBAP2       | 1.8072  | 3.55E-06 | 0.00014737 up   |
| ROGDI        | -1.9757 | 3.54E-06 | 0.00014737 down |
| HERC2P7      | -1.3629 | 3.66E-06 | 0.00015158 down |
| LINC01303    | 3.4213  | 3.81E-06 | 0.00015696 up   |
| NFKB2        | 1.8583  | 3.85E-06 | 0.00015805 up   |
| SLC5A9       | -5.2243 | 3.86E-06 | 0.00015823 down |
| POP1         | 1.2357  | 4.00E-06 | 0.00016373 up   |
| NAT8B        | -6.2924 | 4.01E-06 | 0.00016375 down |
| KCTD7        | -1.6272 | 4.02E-06 | 0.00016386 down |
| C10orf143    | -1.4829 | 4.05E-06 | 0.00016495 down |
| NLRP3        | 2.2667  | 4.16E-06 | 0.00016843 up   |
| TOB1-AS1     | -2.5396 | 4.26E-06 | 0.00017194 down |
| GFPT2        | 3.2565  | 4.28E-06 | 0.00017248 up   |
| R3HDM4       | 1.1955  | 4.40E-06 | 0.00017698 up   |
| C5AR2        | 2.7231  | 4.66E-06 | 0.00018605 up   |
| TAF1D        | 1.1267  | 4.78E-06 | 0.00019046 up   |

|              |         |          |                 |
|--------------|---------|----------|-----------------|
| PUS1         | 1.1786  | 4.84E-06 | 0.00019248 up   |
| TBX10        | -6.2098 | 4.89E-06 | 0.00019385 down |
| LUCAT1       | 5.4148  | 4.89E-06 | 0.00019387 up   |
| DMRTA1       | -1.9455 | 5.11E-06 | 0.00020073 down |
| PAGR1        | -1.2402 | 5.43E-06 | 0.00021233 down |
| AMPD2        | 1.0750  | 5.49E-06 | 0.0002144 up    |
| KLF6         | 1.6792  | 5.58E-06 | 0.00021722 up   |
| ARHGEF37     | -2.0853 | 5.72E-06 | 0.00022209 down |
| CCN4         | 3.1573  | 5.74E-06 | 0.00022274 up   |
| SUGCT        | -2.3697 | 5.79E-06 | 0.0002241 down  |
| CSF3R        | 3.1493  | 5.81E-06 | 0.00022439 up   |
| USP30        | -1.0723 | 5.84E-06 | 0.00022503 down |
| CKAP4        | 1.5623  | 5.94E-06 | 0.0002287 up    |
| KLHL2        | 1.1248  | 6.04E-06 | 0.00023219 up   |
| NIFK         | 1.1398  | 6.07E-06 | 0.00023294 up   |
| HYKK         | -2.0500 | 6.12E-06 | 0.00023418 down |
| FAS          | 1.0000  | 6.22E-06 | 0.00023702 up   |
| HSP90B1      | 1.3927  | 6.31E-06 | 0.00023974 up   |
| GNPNAT1      | 1.2480  | 6.39E-06 | 0.00024199 up   |
| EIF3J-DT     | -1.1146 | 6.52E-06 | 0.00024669 down |
| C17orf113    | -2.2728 | 6.68E-06 | 0.00025215 down |
| RABL2A       | -1.1900 | 6.76E-06 | 0.00025419 down |
| ZSWIM3       | -1.1028 | 6.83E-06 | 0.00025555 down |
| LINC01534    | -1.2475 | 6.82E-06 | 0.00025555 down |
| PAQR8        | -3.1234 | 7.17E-06 | 0.00026763 down |
| LGALS2       | -4.6595 | 7.29E-06 | 0.00027136 down |
| SEC14L5      | -3.2916 | 7.32E-06 | 0.00027181 down |
| NOP58        | 1.4676  | 7.54E-06 | 0.00027914 up   |
| LOC101927825 | -3.8955 | 7.60E-06 | 0.00028119 down |
| ACOX2        | -2.5117 | 7.62E-06 | 0.00028121 down |
| HOXC9        | -2.8076 | 7.67E-06 | 0.00028293 down |
| MIR4435-2HG  | 1.5024  | 7.77E-06 | 0.00028576 up   |
| ZNF331       | 1.8381  | 7.77E-06 | 0.00028576 up   |
| RETN         | 6.3400  | 7.84E-06 | 0.0002878 up    |
| DCUN1D5      | 1.0455  | 8.02E-06 | 0.00029304 up   |
| ACE          | -3.9799 | 8.01E-06 | 0.00029304 down |
| NR3C2        | -2.2568 | 8.05E-06 | 0.0002936 down  |
| FAM161B      | -1.1174 | 8.30E-06 | 0.00030162 down |
| IQSEC2       | -1.0948 | 8.39E-06 | 0.00030385 down |
| NMUR1        | -1.9813 | 8.52E-06 | 0.00030688 down |
| SPAG4        | 2.5227  | 8.51E-06 | 0.00030688 up   |

|              |         |          |                 |
|--------------|---------|----------|-----------------|
| ABCC6        | -3.1323 | 8.62E-06 | 0.00030995 down |
| CYP2J2       | -5.0952 | 8.83E-06 | 0.00031711 down |
| APOB         | -6.1597 | 8.92E-06 | 0.00031827 down |
| LRRC8A       | 1.2691  | 8.91E-06 | 0.00031827 up   |
| MAP2K3       | 1.6239  | 8.90E-06 | 0.00031827 up   |
| LDLR         | 3.0275  | 8.93E-06 | 0.00031827 up   |
| CLEC4D       | 3.3528  | 9.12E-06 | 0.00032352 up   |
| NBR2         | -1.3828 | 9.16E-06 | 0.00032403 down |
| LZTS1        | 2.3630  | 9.21E-06 | 0.00032537 up   |
| P2RY4        | -4.7189 | 9.25E-06 | 0.00032628 down |
| C3orf85      | -6.6648 | 9.37E-06 | 0.00032984 down |
| NOL6         | 1.2131  | 9.38E-06 | 0.00032984 up   |
| DUSP1        | 1.7462  | 9.44E-06 | 0.00033175 up   |
| RNF145       | 1.0619  | 9.48E-06 | 0.00033244 up   |
| LOC100996351 | 4.1297  | 9.49E-06 | 0.00033244 up   |
| CYP4F11      | -5.9894 | 9.50E-06 | 0.00033244 down |
| VIPR1        | -3.6333 | 9.66E-06 | 0.00033758 down |
| KLHL15       | 1.0605  | 9.75E-06 | 0.00033944 up   |
| MMP28        | -2.2878 | 9.79E-06 | 0.00034056 down |
| RPARP-AS1    | -1.6434 | 1.01E-05 | 0.00035174 down |
| MS4A10       | -6.4303 | 1.03E-05 | 0.00035343 down |
| CYP4F2       | -6.7244 | 1.03E-05 | 0.00035343 down |
| PPIEL        | -1.0134 | 1.04E-05 | 0.00035826 down |
| NOD1         | 1.4197  | 1.04E-05 | 0.00035826 up   |
| TMEM129      | -1.0501 | 1.05E-05 | 0.00036052 down |
| HEXIM2       | -1.4524 | 1.06E-05 | 0.00036278 down |
| MMP25        | 2.3433  | 1.07E-05 | 0.00036286 up   |
| A4GALT       | 1.5177  | 1.07E-05 | 0.00036286 up   |
| SPRY1        | 1.8846  | 1.08E-05 | 0.0003657 up    |
| CCDC86       | 1.1912  | 1.08E-05 | 0.00036639 up   |
| ZBTB3        | -1.0465 | 1.08E-05 | 0.00036639 down |
| PBXIP1       | -1.5057 | 1.09E-05 | 0.00036721 down |
| BTC          | -3.3077 | 1.09E-05 | 0.00036724 down |
| TNFSF10      | -1.8792 | 1.09E-05 | 0.0003677 down  |
| TGFBI        | 1.4856  | 1.10E-05 | 0.00036803 up   |
| TMEM132A     | 1.9827  | 1.11E-05 | 0.00037105 up   |
| CCL4         | 2.5581  | 1.13E-05 | 0.00037543 up   |
| MSX2         | 3.2963  | 1.16E-05 | 0.00038439 up   |
| GABPB1       | 1.2879  | 1.20E-05 | 0.00039537 up   |
| TEF          | -1.6319 | 1.22E-05 | 0.00040016 down |
| CRLF1        | 2.7526  | 1.25E-05 | 0.00040916 up   |

|              |         |          |                 |
|--------------|---------|----------|-----------------|
| LRRC66       | -3.7292 | 1.25E-05 | 0.00040945 down |
| LINC01229    | -4.7873 | 1.27E-05 | 0.00041514 down |
| CCDC191      | -1.0868 | 1.28E-05 | 0.00041606 down |
| CAPN9        | -4.9375 | 1.28E-05 | 0.00041613 down |
| TGM2         | 1.5853  | 1.29E-05 | 0.00041736 up   |
| TNFSF9       | 3.5873  | 1.29E-05 | 0.00041741 up   |
| RPL7P1       | 2.3598  | 1.32E-05 | 0.00042735 up   |
| P4HA3        | 2.9347  | 1.32E-05 | 0.00042735 up   |
| SCNN1D       | -1.3836 | 1.34E-05 | 0.00043036 down |
| CNKSR2       | -2.0615 | 1.35E-05 | 0.00043268 down |
| ABCB5        | -3.6487 | 1.39E-05 | 0.00044468 down |
| LOC101930275 | -2.2382 | 1.39E-05 | 0.00044468 down |
| GLUL         | 2.5824  | 1.43E-05 | 0.00045562 up   |
| OARD1        | -1.1667 | 1.43E-05 | 0.00045734 down |
| SLC5A11      | -5.0374 | 1.44E-05 | 0.00045769 down |
| GRIA4        | -4.5938 | 1.45E-05 | 0.00045978 down |
| LOC105371592 | -2.3408 | 1.45E-05 | 0.00046043 down |
| LOC105370941 | -2.3126 | 1.47E-05 | 0.0004659 down  |
| KRT17        | 5.5141  | 1.48E-05 | 0.00046734 up   |
| CREM         | 1.8805  | 1.51E-05 | 0.00047563 up   |
| CCL14        | -2.7453 | 1.52E-05 | 0.00047872 down |
| CASP16P      | -4.7352 | 1.53E-05 | 0.00048121 down |
| AHR          | 1.0967  | 1.55E-05 | 0.00048552 up   |
| IGF1         | 3.2903  | 1.56E-05 | 0.00048753 up   |
| KHK          | -4.0765 | 1.58E-05 | 0.00049146 down |
| SAMD14       | 1.9036  | 1.58E-05 | 0.00049146 up   |
| RPS2P5       | 1.1179  | 1.61E-05 | 0.00050069 up   |
| AEN          | 1.2865  | 1.63E-05 | 0.00050707 up   |
| LOC107985216 | -1.9404 | 1.64E-05 | 0.00050743 down |
| DUSP6        | 1.6581  | 1.64E-05 | 0.00050743 up   |
| PIM3         | 1.5685  | 1.66E-05 | 0.00051158 up   |
| LINC01954    | -4.8740 | 1.69E-05 | 0.00051846 down |
| P3H1         | 1.6234  | 1.69E-05 | 0.00051942 up   |
| PCBP3        | 1.8231  | 1.70E-05 | 0.00052131 up   |
| COL18A1      | 1.8871  | 1.79E-05 | 0.00054593 up   |
| C21orf62     | -4.9105 | 1.82E-05 | 0.0005531 down  |
| YBX3         | 1.7115  | 1.84E-05 | 0.00055682 up   |
| PBLD         | -3.8918 | 1.85E-05 | 0.00055944 down |
| TRMT6        | 1.2253  | 1.85E-05 | 0.00055944 up   |
| PTRH2        | 1.5050  | 1.88E-05 | 0.0005659 up    |
| RPF2         | 1.3433  | 1.88E-05 | 0.00056732 up   |

|              |         |          |                 |
|--------------|---------|----------|-----------------|
| GPD1L        | -1.6677 | 1.90E-05 | 0.0005706 down  |
| SNHG3        | 1.5376  | 1.92E-05 | 0.0005762 up    |
| SPRED3       | 2.7724  | 1.93E-05 | 0.00057774 up   |
| VASN         | 2.3424  | 1.93E-05 | 0.00058 up      |
| TRPM6        | -4.1946 | 1.96E-05 | 0.00058592 down |
| DGAT1        | -3.1213 | 1.96E-05 | 0.0005866 down  |
| CDKN2D       | 1.1199  | 1.97E-05 | 0.00058729 up   |
| CYP4F12      | -4.1107 | 1.99E-05 | 0.00059332 down |
| SLC13A1      | -7.4454 | 2.03E-05 | 0.0006024 down  |
| LOC100129534 | -1.2260 | 2.05E-05 | 0.00060789 down |
| COLCA2       | -2.2633 | 2.06E-05 | 0.00061031 down |
| GNA15        | 2.5289  | 2.07E-05 | 0.00061284 up   |
| C1orf220     | -2.8361 | 2.09E-05 | 0.00061674 down |
| CASTOR3      | -1.1928 | 2.12E-05 | 0.00062343 down |
| SMIM2-AS1    | -3.4648 | 2.12E-05 | 0.00062343 down |
| DHRS12       | -1.0215 | 2.16E-05 | 0.0006315 down  |
| MARCHF8      | -1.3975 | 2.16E-05 | 0.00063244 down |
| KDM8         | -2.5481 | 2.17E-05 | 0.00063421 down |
| C2CD4B       | 3.1886  | 2.17E-05 | 0.00063483 up   |
| ODC1         | 1.3522  | 2.24E-05 | 0.00065169 up   |
| ZNF785       | -1.0735 | 2.29E-05 | 0.00066491 down |
| LYAR         | 1.4059  | 2.30E-05 | 0.00066865 up   |
| NXPE1        | -5.5081 | 2.36E-05 | 0.0006821 down  |
| LIAS         | -1.0826 | 2.39E-05 | 0.00068653 down |
| KCNE1        | 3.6331  | 2.38E-05 | 0.00068653 up   |
| EGR1         | 2.0973  | 2.39E-05 | 0.00068673 up   |
| SLC17A4      | -6.6221 | 2.41E-05 | 0.00068992 down |
| LTV1         | 1.0066  | 2.44E-05 | 0.00069676 up   |
| TPRG1L       | -1.0097 | 2.45E-05 | 0.00069946 down |
| MIR221       | 2.5948  | 2.47E-05 | 0.00070374 up   |
| HSPA13       | 1.2791  | 2.49E-05 | 0.00070803 up   |
| RNPC3        | -1.2611 | 2.51E-05 | 0.00071271 down |
| TMEM217      | 2.4490  | 2.56E-05 | 0.00072103 up   |
| DHRS11       | -3.7383 | 2.56E-05 | 0.00072103 down |
| STPG3        | -3.5899 | 2.57E-05 | 0.00072488 down |
| SLC22A5      | -2.1108 | 2.61E-05 | 0.00073115 down |
| ALOX5AP      | 1.2155  | 2.61E-05 | 0.00073178 up   |
| TDRD12       | -4.1594 | 2.62E-05 | 0.00073222 down |
| ZSWIM4       | 2.1127  | 2.62E-05 | 0.00073222 up   |
| SNORD83A     | 2.7060  | 2.65E-05 | 0.00073856 up   |
| VNN3         | 3.0429  | 2.72E-05 | 0.00075623 up   |

|              |         |          |                 |
|--------------|---------|----------|-----------------|
| NLRP12       | 3.6681  | 2.72E-05 | 0.00075623 up   |
| NINJ1        | 1.6068  | 2.73E-05 | 0.00075763 up   |
| FGF7         | 2.5318  | 2.73E-05 | 0.00075763 up   |
| PTCSC1       | 3.2888  | 2.78E-05 | 0.00077029 up   |
| GADD45B      | 2.0685  | 2.78E-05 | 0.00077029 up   |
| VCAN         | 3.3335  | 2.79E-05 | 0.0007716 up    |
| ZNF514       | -1.0428 | 2.83E-05 | 0.00077946 down |
| ULBP1        | 3.8360  | 2.83E-05 | 0.00077946 up   |
| SLC23A3      | -4.0098 | 2.88E-05 | 0.00079139 down |
| EPHX2        | -2.7447 | 2.88E-05 | 0.00079139 down |
| MBLAC1       | -1.2906 | 2.94E-05 | 0.00080736 down |
| GUCA2A       | -7.1553 | 2.96E-05 | 0.0008108 down  |
| NFKB1        | 1.0319  | 2.96E-05 | 0.0008108 up    |
| CMBL         | -2.9466 | 2.99E-05 | 0.00081693 down |
| B4GALNT2     | -6.1561 | 2.99E-05 | 0.00081693 down |
| OLR1         | 2.4516  | 3.01E-05 | 0.0008209 up    |
| TAT          | -4.0715 | 3.02E-05 | 0.00082244 down |
| TLNRD1       | 1.6261  | 3.05E-05 | 0.00082839 up   |
| ADAMTS1      | 2.7766  | 3.06E-05 | 0.00082974 up   |
| SEMA6B       | 2.5151  | 3.08E-05 | 0.00083287 up   |
| DENND3       | 1.0583  | 3.09E-05 | 0.00083533 up   |
| LOC105369614 | -3.5621 | 3.11E-05 | 0.00084001 down |
| TCEAL9       | 1.7594  | 3.17E-05 | 0.00085314 up   |
| LIMK2        | 1.1205  | 3.17E-05 | 0.00085314 up   |
| HOMER1       | 2.6465  | 3.19E-05 | 0.000856 up     |
| ACADSB       | -1.0581 | 3.19E-05 | 0.000856 down   |
| SDCBP        | 1.4689  | 3.20E-05 | 0.0008567 up    |
| AMY2B        | -1.1467 | 3.23E-05 | 0.00086372 down |
| MCTP1        | 1.9130  | 3.24E-05 | 0.00086682 up   |
| PNPLA8       | 1.1861  | 3.25E-05 | 0.00086682 up   |
| LOX          | 2.3372  | 3.31E-05 | 0.00087913 up   |
| SMC2-AS1     | -3.2262 | 3.36E-05 | 0.00089119 down |
| BID          | 1.1125  | 3.37E-05 | 0.0008922 up    |
| HSP90AB2P    | 2.2283  | 3.39E-05 | 0.00089771 up   |
| ZNF697       | 1.2451  | 3.41E-05 | 0.00090114 up   |
| GSDMC        | 2.6499  | 3.46E-05 | 0.00091143 up   |
| POLR3D       | 1.2608  | 3.46E-05 | 0.00091143 up   |
| MS4A2        | -2.5313 | 3.47E-05 | 0.00091143 down |
| CLSTN3       | 1.1568  | 3.46E-05 | 0.00091143 up   |
| SYCP3        | -2.5351 | 3.49E-05 | 0.00091567 down |
| MEP1B        | -6.4007 | 3.56E-05 | 0.00093055 down |

|              |         |          |                 |
|--------------|---------|----------|-----------------|
| STPG1        | -1.0261 | 3.57E-05 | 0.00093179 down |
| MEP1A        | -6.2791 | 3.58E-05 | 0.00093427 down |
| IL13RA2      | 4.4363  | 3.59E-05 | 0.00093427 up   |
| CLEC2B       | 1.5799  | 3.60E-05 | 0.00093689 up   |
| CD160        | -2.8308 | 3.61E-05 | 0.00093801 down |
| LINC01359    | -1.6676 | 3.62E-05 | 0.00093864 down |
| IDNK         | -2.0056 | 3.63E-05 | 0.00093963 down |
| MIR22HG      | 1.2608  | 3.64E-05 | 0.00094063 up   |
| SLC39A1      | 1.4359  | 3.65E-05 | 0.00094101 up   |
| NSUN5P1      | -1.1302 | 3.65E-05 | 0.00094101 down |
| LINC01235    | 3.7315  | 3.65E-05 | 0.00094101 up   |
| APOA1        | -6.2975 | 3.66E-05 | 0.00094101 down |
| ANO5         | -1.9661 | 3.68E-05 | 0.0009433 down  |
| PTGER2       | 2.1931  | 3.68E-05 | 0.0009433 up    |
| ARPC5L       | 1.2969  | 3.70E-05 | 0.00094805 up   |
| SLC16A6      | 2.8950  | 3.75E-05 | 0.0009571 up    |
| LRRC75B      | -1.9460 | 3.76E-05 | 0.00095943 down |
| TRIB3        | 3.3374  | 3.79E-05 | 0.00096522 up   |
| YARS1        | 1.2693  | 3.92E-05 | 0.00099161 up   |
| GCA          | 1.6596  | 3.91E-05 | 0.00099161 up   |
| BDNF-AS      | -1.0305 | 3.95E-05 | 0.00099718 down |
| LRRC71       | 1.9971  | 3.96E-05 | 0.00099902 up   |
| CASP4        | 1.0901  | 3.98E-05 | 0.00100347 up   |
| HSPA5P1      | 2.9222  | 4.00E-05 | 0.00100732 up   |
| CXCL5        | 6.0813  | 4.04E-05 | 0.00101505 up   |
| TWNK         | 1.2837  | 4.11E-05 | 0.00103273 up   |
| HSPH1        | 3.3101  | 4.14E-05 | 0.00103875 up   |
| LOC100288073 | 2.6400  | 4.19E-05 | 0.00104714 up   |
| HOXA3        | -1.0185 | 4.26E-05 | 0.00105812 down |
| ACVR2B-AS1   | -1.9383 | 4.29E-05 | 0.00106214 down |
| LINC00865    | -1.9385 | 4.32E-05 | 0.0010689 down  |
| ULBP2        | 3.5812  | 4.36E-05 | 0.00107658 up   |
| DCAF13       | 1.1806  | 4.37E-05 | 0.00107905 up   |
| ARL13B       | 1.0596  | 4.40E-05 | 0.00108444 up   |
| LOC107985246 | -1.3266 | 4.44E-05 | 0.00109162 down |
| SSH1         | 1.1617  | 4.47E-05 | 0.00109782 up   |
| DAW1         | 5.0176  | 4.51E-05 | 0.00110596 up   |
| SLC2A11      | -1.2409 | 4.52E-05 | 0.0011066 down  |
| CLEC12A      | 2.4924  | 4.65E-05 | 0.00113167 up   |
| MROH7        | -2.6405 | 4.69E-05 | 0.00114001 down |
| RWDD3        | -1.0666 | 4.72E-05 | 0.0011441 down  |



|          |         |          |                 |
|----------|---------|----------|-----------------|
| PDZRN4   | -4.5060 | 4.73E-05 | 0.0011441 down  |
| KCNH6    | -5.2199 | 4.73E-05 | 0.0011441 down  |
| ZNF572   | -1.7236 | 4.74E-05 | 0.00114499 down |
| RSRP1    | -1.4083 | 4.76E-05 | 0.00114745 down |
| MPV17L   | -1.6151 | 4.77E-05 | 0.00114839 down |
| LY6G6C   | 3.0385  | 4.85E-05 | 0.00116794 up   |
| PLEKHM2  | 1.0142  | 4.87E-05 | 0.00116864 up   |
| TREH     | -4.6822 | 4.87E-05 | 0.00116864 down |
| SHBG     | -3.9468 | 4.95E-05 | 0.00118356 down |
| COMP     | 4.6983  | 5.01E-05 | 0.00119561 up   |
| MAK16    | 1.2915  | 5.03E-05 | 0.0011984 up    |
| CTSL     | 2.5089  | 5.05E-05 | 0.00120033 up   |
| SLC46A3  | -2.6305 | 5.08E-05 | 0.00120338 down |
| MIR600HG | -1.9841 | 5.10E-05 | 0.00120426 down |
| RAB37    | -1.8469 | 5.17E-05 | 0.00121759 down |
| BDKRB2   | 1.8256  | 5.24E-05 | 0.00123115 up   |
| RAB8B    | 1.0364  | 5.31E-05 | 0.00124777 up   |
| GLA      | 1.0288  | 5.39E-05 | 0.00126165 up   |
| AQP11    | -2.6278 | 5.39E-05 | 0.00126165 down |
| MFSD8    | -1.0443 | 5.41E-05 | 0.00126288 down |
| FOXO4    | -1.2321 | 5.43E-05 | 0.00126585 down |
| SMIM3    | 1.7934  | 5.46E-05 | 0.00127098 up   |
| ZNF112   | -1.0631 | 5.49E-05 | 0.00127775 down |
| MROH5    | 5.2108  | 5.54E-05 | 0.00128507 up   |
| ZNF607   | -1.3490 | 5.54E-05 | 0.00128507 down |
| TIGAR    | 1.3921  | 5.57E-05 | 0.00128931 up   |
| CD300E   | 3.7903  | 5.57E-05 | 0.00128931 up   |
| IER2     | 1.1209  | 5.60E-05 | 0.00129322 up   |
| ARHGAP33 | -1.1289 | 5.82E-05 | 0.00133868 down |
| C15orf39 | 1.1559  | 5.87E-05 | 0.00134805 up   |
| MARCO    | 4.8519  | 5.91E-05 | 0.0013559 up    |
| CLPB     | 1.2334  | 5.91E-05 | 0.0013559 up    |
| HOXB8    | -2.2839 | 5.92E-05 | 0.0013559 down  |
| SULF2    | 1.6818  | 5.95E-05 | 0.00136067 up   |
| NFKBIA   | 1.9998  | 5.99E-05 | 0.00136996 up   |
| PIM1     | 1.7201  | 6.02E-05 | 0.00137038 up   |
| SMPD3    | -4.0451 | 6.01E-05 | 0.00137038 down |
| PLEKHA4  | 1.7361  | 6.01E-05 | 0.00137038 up   |
| FSTL3    | 2.2156  | 6.03E-05 | 0.00137111 up   |
| TKTL1    | 3.4251  | 6.08E-05 | 0.00138267 up   |
| VEPH1    | 3.0921  | 6.10E-05 | 0.00138335 up   |

|              |         |          |                 |
|--------------|---------|----------|-----------------|
| TMEM220      | -2.6100 | 6.09E-05 | 0.00138335 down |
| ATG9B        | 3.0161  | 6.16E-05 | 0.00139336 up   |
| COQ9         | -1.1284 | 6.24E-05 | 0.00140821 down |
| CD55         | 2.1530  | 6.32E-05 | 0.00142458 up   |
| QRFP         | 3.0990  | 6.37E-05 | 0.00143399 up   |
| GATA6-AS1    | -3.5674 | 6.41E-05 | 0.00143978 down |
| RN7SKP16     | 2.1984  | 6.47E-05 | 0.00144959 up   |
| GDPD2        | -5.6688 | 6.49E-05 | 0.00145183 down |
| IPO4         | 1.5197  | 6.52E-05 | 0.00145494 up   |
| RNF207       | -1.0635 | 6.61E-05 | 0.00147197 down |
| ADGRA3       | -1.0028 | 6.64E-05 | 0.0014771 down  |
| SH3GLB2      | -1.0181 | 6.66E-05 | 0.00147871 down |
| OSCAR        | 3.0517  | 6.86E-05 | 0.00151867 up   |
| TPBGL        | 2.1372  | 7.00E-05 | 0.00154643 up   |
| HSP90B3P     | 1.4564  | 7.01E-05 | 0.00154725 up   |
| LRRC15       | 3.5761  | 7.02E-05 | 0.00154725 up   |
| LINC02829    | -4.4524 | 7.03E-05 | 0.00154725 down |
| BCAS1        | -4.8862 | 7.05E-05 | 0.00155121 down |
| CRAT         | -1.0961 | 7.10E-05 | 0.00156105 down |
| LOC100507437 | -1.2153 | 7.13E-05 | 0.00156438 down |
| RAPH1        | 1.6105  | 7.15E-05 | 0.00156531 up   |
| REM2         | 2.4465  | 7.23E-05 | 0.00157914 up   |
| JMJD6        | 1.2335  | 7.35E-05 | 0.00160286 up   |
| SRXN1        | 1.6649  | 7.44E-05 | 0.0016149 up    |
| INPP5J       | -3.8732 | 7.46E-05 | 0.0016184 down  |
| PCK2         | -3.1547 | 7.48E-05 | 0.00162097 down |
| SLC16A9      | -2.8619 | 7.60E-05 | 0.00164052 down |
| PPIP5K1      | -1.3186 | 7.59E-05 | 0.00164052 down |
| IRF9         | -1.1148 | 7.79E-05 | 0.00167586 down |
| PHF7         | -1.2263 | 7.96E-05 | 0.0017054 down  |
| CCDC151      | 1.6433  | 8.13E-05 | 0.00174144 up   |
| PLB1         | -3.9351 | 8.15E-05 | 0.00174146 down |
| CARNS1       | -2.6648 | 8.14E-05 | 0.00174146 down |
| ENTPD5       | -2.6618 | 8.17E-05 | 0.00174417 down |
| IGSF9        | -4.4960 | 8.24E-05 | 0.00175842 down |
| PYY          | -5.9456 | 8.26E-05 | 0.00176134 down |
| PIFO         | -2.9695 | 8.34E-05 | 0.0017725 down  |
| PRKAB2       | -1.3938 | 8.33E-05 | 0.0017725 down  |
| GPR75        | 1.7854  | 8.34E-05 | 0.0017725 up    |
| SLC14A2      | -3.5988 | 8.33E-05 | 0.0017725 down  |
| CRIP3        | -2.5727 | 8.39E-05 | 0.00178012 down |

|              |         |            |                 |
|--------------|---------|------------|-----------------|
| ABCC13       | -4.5810 | 8.54E-05   | 0.00180786 down |
| SEMA3F       | 1.5866  | 8.61E-05   | 0.00181817 up   |
| PDE5A        | -2.2325 | 8.61E-05   | 0.00181817 down |
| SLC51B       | -4.2672 | 8.60E-05   | 0.00181817 down |
| SNHG22       | -1.4718 | 8.63E-05   | 0.00182017 down |
| RYR3         | -2.1370 | 8.64E-05   | 0.00182152 down |
| ZC3H12A      | 2.2144  | 8.72E-05   | 0.00183619 up   |
| ZNF519       | -1.7739 | 8.74E-05   | 0.00183817 down |
| CEP44        | -1.0970 | 8.76E-05   | 0.00184032 down |
| C9orf24      | -2.8138 | 8.79E-05   | 0.00184522 down |
| FAM98C       | -1.0779 | 8.81E-05   | 0.00184852 down |
| HES7         | 2.2846  | 8.89E-05   | 0.00186217 up   |
| PROSER2      | 2.1447  | 8.91E-05   | 0.00186229 up   |
| LINC00886    | -1.7832 | 8.94E-05   | 0.00186678 down |
| KCNJ15       | 3.4322  | 8.95E-05   | 0.00186678 up   |
| TSBP1-AS1    | -2.4206 | 9.01E-05   | 0.00187716 down |
| MGAM         | -4.6635 | 9.10E-05   | 0.00189194 down |
| ZNF488       | -4.3064 | 9.18E-05   | 0.00190541 down |
| ZNF782       | -1.3630 | 9.19E-05   | 0.00190561 down |
| RPS2P46      | 1.1782  | 9.22E-05   | 0.00190753 up   |
| GRPEL1       | 1.1498  | 9.26E-05   | 0.00191145 up   |
| CHRDL2       | 4.8748  | 9.27E-05   | 0.00191145 up   |
| FNIP2        | 1.1970  | 9.28E-05   | 0.00191206 up   |
| ZNF469       | 2.8502  | 9.33E-05   | 0.00192166 up   |
| SLC4A10      | -2.3015 | 9.41E-05   | 0.00193404 down |
| CD300H       | 3.1924  | 9.42E-05   | 0.00193445 up   |
| CMTM2        | 2.6604  | 9.50E-05   | 0.00194833 up   |
| LOC107987462 | 2.9584  | 9.52E-05   | 0.00195107 up   |
| TMEM25       | -2.5061 | 9.54E-05   | 0.0019546 down  |
| MEFV         | 2.3923  | 9.76E-05   | 0.00199229 up   |
| MMP19        | 3.6083  | 9.78E-05   | 0.00199406 up   |
| ARNTL2       | 1.9733  | 9.83E-05   | 0.00200109 up   |
| PRR7         | 1.8252  | 9.87E-05   | 0.00200633 up   |
| IL27         | 3.7538  | 9.89E-05   | 0.00200933 up   |
| CHD1         | 1.0503  | 9.91E-05   | 0.00201219 up   |
| ASB16-AS1    | -1.3815 | 9.95E-05   | 0.00201807 down |
| AMOT         | -1.5286 | 9.96E-05   | 0.0020189 down  |
| CCDC152      | -3.0288 | 0.00010129 | 0.00204414 down |
| RCN1         | 1.4108  | 0.00010175 | 0.00205177 up   |
| WIP1         | 1.6532  | 0.00010386 | 0.00209078 up   |
| CDH11        | 1.8235  | 0.00010411 | 0.00209416 up   |

|              |         |            |                 |
|--------------|---------|------------|-----------------|
| CTHRC1       | 2.1225  | 0.00010665 | 0.00214006 up   |
| ACADM        | -1.1907 | 0.00010677 | 0.00214057 down |
| ZNRD1ASP     | -1.3205 | 0.00010786 | 0.00215728 down |
| SIK1B        | 2.4946  | 0.00010798 | 0.00215786 up   |
| GCKR         | 3.2546  | 0.00010852 | 0.00216692 up   |
| ADGRE2       | 2.4677  | 0.00010895 | 0.00217372 up   |
| MMP10        | 6.2202  | 0.00010952 | 0.00218142 up   |
| HCK          | 2.5610  | 0.00010951 | 0.00218142 up   |
| G6PC         | -6.3673 | 0.00011012 | 0.0021917 down  |
| GCNT4        | -2.8934 | 0.0001103  | 0.00219226 down |
| AMIGO1       | -1.7712 | 0.00011173 | 0.0022112 down  |
| FADS1        | 1.6709  | 0.00011228 | 0.00221842 up   |
| HOXA10       | -3.8996 | 0.00011241 | 0.00221914 down |
| SEC23B       | 1.0791  | 0.00011431 | 0.00224954 up   |
| PDK2         | -1.6784 | 0.00011722 | 0.00229568 down |
| IFI27        | -1.9148 | 0.00011815 | 0.00231214 down |
| CIRBP-AS1    | 1.1364  | 0.00011894 | 0.00232189 up   |
| CCDC162P     | -2.8657 | 0.00012018 | 0.00234441 down |
| PANK1        | -2.5129 | 0.00012205 | 0.00237703 down |
| TLCD3A       | 1.3541  | 0.00012308 | 0.00239517 up   |
| EXOC6B       | -1.1134 | 0.00012385 | 0.00240832 down |
| KCNQ3        | 1.9201  | 0.00012425 | 0.00241409 up   |
| LINC00473    | 2.0978  | 0.00012538 | 0.00243035 up   |
| CCDC183      | -1.9232 | 0.00012651 | 0.00244825 down |
| DNAAF1       | 2.2705  | 0.00012694 | 0.00245465 up   |
| NGFR         | 2.2364  | 0.0001277  | 0.00246744 up   |
| HYAL3        | 1.1974  | 0.000128   | 0.00247129 up   |
| PDZK1        | -4.5757 | 0.00012815 | 0.00247227 down |
| USP32        | 1.0245  | 0.00012843 | 0.00247569 up   |
| LOC101927495 | -4.0481 | 0.00012937 | 0.00248991 down |
| HMGB1P49     | -3.3608 | 0.00012948 | 0.00249002 down |
| CD163        | 3.8533  | 0.00013113 | 0.00251594 up   |
| CCDC9B       | -2.3212 | 0.00013124 | 0.00251609 down |
| KBTBD7       | -1.0136 | 0.00013452 | 0.00256888 down |
| APOM         | -2.4446 | 0.00013489 | 0.00257397 down |
| SSH3         | -1.1067 | 0.00013502 | 0.00257447 down |
| NTS          | -4.5333 | 0.00013807 | 0.00262638 down |
| DNTTIP2      | 1.1282  | 0.00013902 | 0.00263788 up   |
| TNNC2        | -2.6940 | 0.0001391  | 0.00263788 down |
| LINC01748    | -3.2795 | 0.00013954 | 0.0026441 down  |
| NDUFV2       | 2.0067  | 0.00013987 | 0.00264838 up   |

|              |         |            |                 |
|--------------|---------|------------|-----------------|
| MANEA-DT     | -2.1980 | 0.00014003 | 0.00264936 down |
| LOC100129844 | 3.0150  | 0.00014058 | 0.0026557 up    |
| PWP2         | 2.2455  | 0.00014054 | 0.0026557 up    |
| TEX52        | -1.9108 | 0.00014148 | 0.00266961 down |
| ZNF248       | -1.2633 | 0.00014347 | 0.00270186 down |
| CA3          | -2.1767 | 0.00014422 | 0.00271243 down |
| CCN2         | 2.0235  | 0.0001466  | 0.00274801 up   |
| NOD2         | 1.6484  | 0.00014649 | 0.00274801 up   |
| BRIX1        | 1.1643  | 0.00014735 | 0.00275385 up   |
| PPIB         | 1.1759  | 0.00014746 | 0.00275385 up   |
| ZNF827       | -1.6296 | 0.00014791 | 0.00276006 down |
| NAP1L1P1     | 1.2371  | 0.00014932 | 0.0027842 up    |
| SRP14P4      | -3.2274 | 0.00015145 | 0.00281711 down |
| IL1R1        | 2.0430  | 0.00015181 | 0.00281711 up   |
| NOCT         | 1.7136  | 0.00015182 | 0.00281711 up   |
| PLN          | -3.4518 | 0.000152   | 0.00281711 down |
| CHN2         | -3.0419 | 0.00015194 | 0.00281711 down |
| FLT1         | 2.3229  | 0.00015231 | 0.00282081 up   |
| LIPG         | 2.3306  | 0.0001528  | 0.00282765 up   |
| GSTM4        | -1.8760 | 0.00015319 | 0.00283283 down |
| TAF13        | 1.4790  | 0.00015407 | 0.00284513 up   |
| HEPH         | -2.6818 | 0.00015485 | 0.0028526 down  |
| PARD3B       | -1.4474 | 0.00015608 | 0.00286886 down |
| PPBP         | 3.9863  | 0.00015654 | 0.00287512 up   |
| LCP2         | 1.3157  | 0.00015683 | 0.00287837 up   |
| LINC01558    | -2.5354 | 0.00015746 | 0.00288766 down |
| LINC01465    | 1.4399  | 0.00015802 | 0.00289369 up   |
| MIR3936HG    | -2.2411 | 0.00015914 | 0.00290768 down |
| FKBP10       | 1.8915  | 0.00016043 | 0.0029291 up    |
| AGO2         | 1.0546  | 0.00016114 | 0.00293984 up   |
| BCL6         | 2.2769  | 0.00016138 | 0.00294086 up   |
| TM6SF2       | -4.4616 | 0.00016276 | 0.00296065 down |
| LINC00574    | -4.3846 | 0.00016325 | 0.00296726 down |
| TPST1        | 1.6199  | 0.00016534 | 0.00299859 up   |
| STARD13-AS   | 2.3660  | 0.00016619 | 0.00301181 up   |
| SLC7A4       | -2.1865 | 0.00016677 | 0.00302017 down |
| HR           | -1.3698 | 0.00016773 | 0.00303529 down |
| MFSD13B      | -2.0747 | 0.00016798 | 0.0030376 down  |
| TLCD4        | -1.8054 | 0.00016855 | 0.00304327 down |
| CASR         | -4.9147 | 0.00016849 | 0.00304327 down |
| LINC00923    | -2.0895 | 0.00017018 | 0.00306976 down |

|              |         |            |                 |
|--------------|---------|------------|-----------------|
| NOP10        | 1.1323  | 0.00017039 | 0.00306976 up   |
| LOC644656    | -1.5882 | 0.00017376 | 0.00312135 down |
| ASTL         | 3.8429  | 0.00017449 | 0.00313117 up   |
| ABRA         | 4.4043  | 0.00017456 | 0.00313117 up   |
| EDNRB        | 1.5804  | 0.00017545 | 0.00314247 up   |
| NKD2         | 2.4795  | 0.00017728 | 0.00316928 up   |
| CYS1         | -3.3075 | 0.00017776 | 0.00317463 down |
| PRKG2        | -3.1163 | 0.0001788  | 0.0031818 down  |
| RNF144B      | 1.9132  | 0.00018242 | 0.00324135 up   |
| LYPLAL1-DT   | -3.0727 | 0.00018278 | 0.00324526 down |
| HPGD         | -2.9983 | 0.00018383 | 0.00325924 down |
| ACSS1        | -1.6601 | 0.00018484 | 0.00327481 down |
| LBP          | 6.2829  | 0.00018547 | 0.00328125 up   |
| RCL1         | 1.2472  | 0.0001869  | 0.00330175 up   |
| ADGRG1       | 1.7643  | 0.00018807 | 0.00331764 up   |
| TRANK1       | -1.4356 | 0.00019232 | 0.00338519 down |
| CEBPD        | 1.6929  | 0.00019388 | 0.00341026 up   |
| MLKL         | 1.5971  | 0.00019469 | 0.00342205 up   |
| HNFI1A-AS1   | -5.0200 | 0.00019484 | 0.0034223 down  |
| ERICH4       | -4.1922 | 0.0001952  | 0.00342362 down |
| ACP6         | -1.1592 | 0.00019722 | 0.00345421 down |
| PTGDR        | -1.8650 | 0.00019884 | 0.00347505 down |
| DNAJB1       | 3.4954  | 0.00020184 | 0.00351757 up   |
| LMCD1        | 2.7287  | 0.00020262 | 0.00352611 up   |
| COL24A1      | -2.5093 | 0.00020547 | 0.00356557 down |
| GSTM2        | -1.8213 | 0.00020697 | 0.00358911 down |
| HILPDA       | 2.0094  | 0.00021189 | 0.00366406 up   |
| LINC01778    | -4.3880 | 0.0002132  | 0.00368406 down |
| IMPDH1P10    | 2.4609  | 0.0002141  | 0.00369437 up   |
| MAT2A        | 1.1148  | 0.00021607 | 0.00372315 up   |
| TLR3         | -1.4925 | 0.00021731 | 0.00373657 down |
| IFI16        | 1.2800  | 0.0002191  | 0.00376208 up   |
| C1QTNF7      | -2.9332 | 0.00021943 | 0.00376508 down |
| ABCC6P2      | -3.2255 | 0.00022017 | 0.00377519 down |
| HOXB-AS3     | -1.4646 | 0.00022193 | 0.00380266 down |
| SLC52A1      | -4.4501 | 0.00022237 | 0.00380767 down |
| LOC100505664 | 2.5450  | 0.00022286 | 0.00380828 up   |
| LOC101928058 | -3.2690 | 0.00022599 | 0.00385615 down |
| BCDIN3D-AS1  | -1.8037 | 0.00022714 | 0.00387311 down |
| ITGA5        | 2.4085  | 0.00023184 | 0.00393956 up   |
| UNC5A        | 2.3881  | 0.00023306 | 0.00395475 up   |

|              |         |            |                 |
|--------------|---------|------------|-----------------|
| IL1A         | 5.3884  | 0.00023474 | 0.00397775 up   |
| CLCN1        | -3.2705 | 0.0002363  | 0.00399862 down |
| LOC102724330 | -1.4315 | 0.00023993 | 0.0040461 down  |
| CDK20        | -1.3720 | 0.00024038 | 0.0040497 down  |
| LOC554206    | -1.4426 | 0.00024052 | 0.0040497 down  |
| CCL3L3       | 3.1889  | 0.00024064 | 0.0040497 up    |
| WDR3         | 1.0512  | 0.0002452  | 0.00410674 up   |
| SLC7A2       | 1.7254  | 0.0002461  | 0.00411619 up   |
| ZNF439       | -1.5787 | 0.00024789 | 0.00414338 down |
| ZNF267       | 1.1941  | 0.00024818 | 0.00414532 up   |
| LOC100133315 | -1.3230 | 0.00025012 | 0.00416921 down |
| SNORD15B     | 3.0248  | 0.00025101 | 0.0041813 up    |
| PKM          | 1.0524  | 0.00025122 | 0.00418182 up   |
| LINC00242    | -1.7694 | 0.00025211 | 0.00419099 down |
| CEBPB-AS1    | -1.6483 | 0.00025371 | 0.00421473 down |
| STARD5       | -2.2673 | 0.00025409 | 0.00421827 down |
| SLC35E2A     | -1.4832 | 0.00025434 | 0.00421957 down |
| GNRHR2       | -1.9179 | 0.00025807 | 0.00426295 down |
| ENPEP        | -3.6725 | 0.00025934 | 0.0042793 down  |
| MSX1         | 2.8029  | 0.00025979 | 0.00428227 up   |
| LOC101927702 | -2.3839 | 0.00025987 | 0.00428227 down |
| CD1C         | -3.2417 | 0.00026121 | 0.00430071 down |
| PEAK3        | 1.7627  | 0.00026134 | 0.00430071 up   |
| ACOXL        | -1.5530 | 0.00026248 | 0.00431532 down |
| ARF4         | 1.3064  | 0.00026258 | 0.00431532 up   |
| MS4A8        | -5.4444 | 0.00026523 | 0.00435015 down |
| ARTN         | 2.2920  | 0.00026554 | 0.00435227 up   |
| ITGA10       | 2.6107  | 0.00026743 | 0.00437455 up   |
| FRMD1        | -4.5150 | 0.00026784 | 0.00437837 down |
| BCL2A1       | 2.6962  | 0.00026934 | 0.00439697 up   |
| ECI1         | -1.0608 | 0.0002698  | 0.00440154 down |
| IL17RA       | 1.3742  | 0.00027065 | 0.00441254 up   |
| SLC37A4      | -2.4627 | 0.00027128 | 0.00441984 down |
| MROCKI       | -3.0283 | 0.00027209 | 0.00442713 down |
| CDHR5        | -5.2214 | 0.00027267 | 0.0044336 down  |
| GGCT         | 1.0683  | 0.00027303 | 0.0044365 up    |
| ACCS         | -1.7001 | 0.0002736  | 0.00444285 down |
| GRTP1        | -2.5108 | 0.00027613 | 0.00447796 down |
| LOC100506302 | -2.1007 | 0.00027934 | 0.00452399 down |
| ZBED8        | -1.6056 | 0.00028008 | 0.00453306 down |
| TMEM221      | -1.7756 | 0.00028091 | 0.00454045 down |

|              |         |            |                 |
|--------------|---------|------------|-----------------|
| CYBRD1       | -1.8250 | 0.00028491 | 0.00458648 down |
| ABHD6        | -1.8682 | 0.0002848  | 0.00458648 down |
| CNGB3        | -4.6300 | 0.0002847  | 0.00458648 down |
| SAXO2        | -2.1183 | 0.000285   | 0.00458648 down |
| LOC107984142 | -1.8333 | 0.00028497 | 0.00458648 down |
| LOC105372401 | 1.2348  | 0.00028507 | 0.00458648 up   |
| KCNJ2        | 1.3007  | 0.0002855  | 0.0045905 up    |
| FTH1P2       | 1.8721  | 0.0002867  | 0.00460365 up   |
| LPCAT1       | 1.0834  | 0.0002884  | 0.00462492 up   |
| DPY19L1      | 1.0161  | 0.00028923 | 0.0046352 up    |
| FMO5         | -3.2831 | 0.00028981 | 0.00464145 down |
| PNRC1        | 1.0722  | 0.00029065 | 0.00465196 up   |
| ORM1         | 3.8864  | 0.00029223 | 0.00467419 up   |
| NTM          | -2.7035 | 0.00029384 | 0.00469114 down |
| SNORD19      | 3.1064  | 0.00029527 | 0.00470843 up   |
| PRRG3        | -2.0522 | 0.00029695 | 0.00473113 down |
| SUCLG1       | -1.3480 | 0.00029786 | 0.00473639 down |
| CD93         | 2.1202  | 0.00029875 | 0.00474446 up   |
| ACVRL1       | 1.3023  | 0.00029977 | 0.0047575 up    |
| F5           | 2.3624  | 0.00030217 | 0.00478321 up   |
| GRM2         | 2.9537  | 0.00030277 | 0.00478965 up   |
| GABRD        | 2.2079  | 0.00030331 | 0.00479503 up   |
| AADAC        | -4.6063 | 0.00030698 | 0.00484097 down |
| REP15        | -3.3811 | 0.00030686 | 0.00484097 down |
| BTN3A1       | -1.1411 | 0.00030792 | 0.00485238 down |
| BCHE         | -3.3235 | 0.0003091  | 0.0048678 down  |
| CCL26        | 2.5374  | 0.00031267 | 0.00491762 up   |
| LOC105378083 | -1.0349 | 0.00031404 | 0.0049305 down  |
| RAD51-AS1    | -1.1591 | 0.00031409 | 0.0049305 down  |
| PLD4         | -3.1207 | 0.0003148  | 0.00493851 down |
| RPGR         | 1.3033  | 0.00031659 | 0.00496021 up   |
| NDUFA6-DT    | -1.8065 | 0.00031686 | 0.00496133 down |
| SLC35E4      | 1.5882  | 0.00031881 | 0.00498541 up   |
| CYP2B6       | -5.6715 | 0.00031903 | 0.00498569 down |
| MAGI3        | -1.2797 | 0.0003215  | 0.00500736 down |
| LAMC1-AS1    | 1.7147  | 0.00032147 | 0.00500736 up   |
| RMDN2        | -1.6480 | 0.0003212  | 0.00500736 down |
| VSIG10       | -2.0295 | 0.00032461 | 0.00504728 down |
| PLA2R1       | -1.7469 | 0.0003252  | 0.00505004 down |
| CABCOC01     | -4.3435 | 0.00032609 | 0.00505733 down |
| SLC22A15     | 1.1024  | 0.00032749 | 0.00506628 up   |



|              |         |            |                 |
|--------------|---------|------------|-----------------|
| SPTSSA       | 1.0287  | 0.00033263 | 0.00513928 up   |
| TMEM229B     | -1.5792 | 0.00033286 | 0.00513967 down |
| FLT1P1       | 2.5782  | 0.00033641 | 0.00518787 up   |
| TTC23L-AS1   | -2.0603 | 0.00034091 | 0.00525062 down |
| F2RL3        | 2.6329  | 0.00034152 | 0.00525675 up   |
| PRRX2        | 2.2584  | 0.0003418  | 0.00525785 up   |
| ABCA5        | -1.9423 | 0.00034264 | 0.00526737 down |
| ECSCR        | 1.2882  | 0.00034563 | 0.00530007 up   |
| ZNF823       | -1.0416 | 0.00034767 | 0.00532801 down |
| GARS1        | 1.4302  | 0.00034887 | 0.00534304 up   |
| BMP3         | -4.0101 | 0.00035372 | 0.00540724 down |
| LINC02175    | -1.3832 | 0.00035365 | 0.00540724 down |
| TPSG1        | -3.1807 | 0.00035439 | 0.00541405 down |
| AP2S1        | 1.0907  | 0.00035516 | 0.0054196 up    |
| XPNPEP2      | -3.7081 | 0.00036006 | 0.0054803 down  |
| COQ4         | -1.1823 | 0.00036144 | 0.00549779 down |
| NOX1         | -2.7827 | 0.00036208 | 0.00549836 down |
| RILPL2       | 1.4673  | 0.00036184 | 0.00549836 up   |
| PHLPP2       | -2.3923 | 0.0003639  | 0.00551476 down |
| LOC101928725 | -3.3957 | 0.00036528 | 0.00553218 down |
| FKBP1C       | 1.6296  | 0.00036634 | 0.00554478 up   |
| GOLT1B       | 1.3397  | 0.00037354 | 0.00563649 up   |
| VSIG4        | 3.9005  | 0.00037408 | 0.00564112 up   |
| PGM5-AS1     | -3.5429 | 0.00037498 | 0.00564809 down |
| RHBDF2       | 1.6536  | 0.000375   | 0.00564809 up   |
| TACR2        | -3.8492 | 0.00037525 | 0.00564833 down |
| B3GALT6      | 1.0275  | 0.0003781  | 0.00568082 up   |
| YBX2         | -3.0410 | 0.00037846 | 0.00568262 down |
| NHSL1        | -2.1736 | 0.00038008 | 0.0056965 down  |
| C6orf136     | -1.7050 | 0.00038066 | 0.00569831 down |
| TCTEX1D4     | 2.2286  | 0.00038112 | 0.00570176 up   |
| PHLDA2       | 2.5025  | 0.00038335 | 0.00572547 up   |
| STEAP1       | 2.4205  | 0.000389   | 0.00579004 up   |
| AGBL2        | -2.3973 | 0.00038939 | 0.00579004 down |
| HCG27        | -1.7624 | 0.00039152 | 0.0058078 down  |
| SMLR1        | -5.7773 | 0.00039153 | 0.0058078 down  |
| IGSF3        | -2.0260 | 0.00039198 | 0.00581043 down |
| NIPAL3       | -1.0080 | 0.00039319 | 0.00582185 down |
| TWIST1       | 2.9004  | 0.00039465 | 0.00583638 up   |
| BPHL         | -1.7968 | 0.00039781 | 0.00587613 down |
| ADAMTS3      | 1.9555  | 0.00039889 | 0.0058885 up    |

|            |         |            |                 |
|------------|---------|------------|-----------------|
| KLF16      | 1.1663  | 0.00040393 | 0.00595568 up   |
| ZFP3       | -1.0612 | 0.00040815 | 0.0060107 down  |
| FAM177B    | -2.9863 | 0.0004088  | 0.0060167 down  |
| RALGPS1    | -2.1655 | 0.00040949 | 0.00602314 down |
| COL4A2-AS1 | 2.0197  | 0.0004106  | 0.00603589 up   |
| ZMAT1      | -1.0414 | 0.00041188 | 0.00604744 down |
| ROR1-AS1   | 2.0153  | 0.00041329 | 0.00605714 up   |
| IRAK2      | 2.0524  | 0.00041712 | 0.00608793 up   |
| SH3PXD2B   | 1.6655  | 0.00041711 | 0.00608793 up   |
| TMEM236    | -3.5866 | 0.00041693 | 0.00608793 down |
| ABCC6P1    | -3.8458 | 0.00041693 | 0.00608793 down |
| NR4A1      | 2.6127  | 0.00041871 | 0.00610424 up   |
| DHRS4-AS1  | -1.3785 | 0.00041873 | 0.00610424 down |
| PGM3       | 1.0343  | 0.00041947 | 0.00611141 up   |
| TSPOAP1    | -2.0024 | 0.00042007 | 0.00611242 down |
| PRND       | -4.1310 | 0.00042028 | 0.00611242 down |
| KCNJ14     | 2.0731  | 0.00042054 | 0.00611242 up   |
| ZNF91      | -1.4806 | 0.00042601 | 0.0061772 down  |
| SHD        | -3.6445 | 0.00042671 | 0.00618371 down |
| GSTO1      | 1.1921  | 0.00042777 | 0.00619483 up   |
| LOC400499  | 2.3183  | 0.0004282  | 0.00619483 up   |
| ZFP36      | 1.4696  | 0.00043138 | 0.00623296 up   |
| AGFG1      | 1.2084  | 0.00043382 | 0.00626263 up   |
| CEBPA-DT   | -2.0185 | 0.00043394 | 0.00626263 down |
| RAB9B      | -2.4292 | 0.00043442 | 0.00626585 down |
| TNIP3      | 2.5734  | 0.00043558 | 0.00627547 up   |
| DAAM2-AS1  | 1.1397  | 0.0004356  | 0.00627547 up   |
| ECRG4      | -2.3103 | 0.00043739 | 0.00629762 down |
| FCGR2A     | 2.7052  | 0.00044657 | 0.00641473 up   |
| IGSF10     | -2.6190 | 0.00044875 | 0.00644222 down |
| CCL8       | 2.1873  | 0.00045035 | 0.00646002 up   |
| PHGR1      | -6.0059 | 0.00045169 | 0.00646547 down |
| PF4        | 3.1783  | 0.00045267 | 0.00647574 up   |
| HEATR4     | -1.1495 | 0.00045403 | 0.00648904 down |
| GFER       | -1.3312 | 0.00045413 | 0.00648904 down |
| CCT5P1     | 1.0474  | 0.00045686 | 0.00652051 up   |
| GNA11      | -1.8208 | 0.00045727 | 0.00652249 down |
| OLAH       | 3.7660  | 0.00045771 | 0.00652508 up   |
| ST3GAL1    | 1.9818  | 0.00046341 | 0.00659857 up   |
| ST8SIA1    | -2.0128 | 0.0004653  | 0.00662168 down |
| CFAP44     | -1.0285 | 0.00046808 | 0.00664965 down |

|              |         |            |                 |
|--------------|---------|------------|-----------------|
| PGK1         | 1.0232  | 0.00046836 | 0.0066498 up    |
| MSN          | 1.4190  | 0.0004698  | 0.00666251 up   |
| CCIN         | 3.2801  | 0.00047208 | 0.00668705 up   |
| LINC00365    | -3.3133 | 0.00047336 | 0.00669405 down |
| CROT         | -1.4821 | 0.00047761 | 0.00674202 down |
| LINC00570    | -3.2156 | 0.0004792  | 0.00675784 down |
| SEMA4G       | -3.1702 | 0.00047928 | 0.00675784 down |
| TTL6         | -3.6595 | 0.00048148 | 0.0067772 down  |
| ZBTB26       | -1.1288 | 0.00048207 | 0.00678063 down |
| KLRK1-AS1    | -1.5842 | 0.00048241 | 0.00678063 down |
| MARCHF3      | 1.6779  | 0.00048404 | 0.00679368 up   |
| TMEM253      | -3.3742 | 0.00048451 | 0.00679644 down |
| BTNL8        | -4.3868 | 0.00048651 | 0.00680893 down |
| RAG1         | -1.8721 | 0.0004865  | 0.00680893 down |
| IL10         | 3.2610  | 0.00049139 | 0.00686942 up   |
| LILRB2       | 3.2195  | 0.00049316 | 0.0068823 up    |
| LINC02747    | -5.0051 | 0.00049389 | 0.00688856 down |
| HTR2B        | -3.4695 | 0.00049513 | 0.00690199 down |
| SGTB         | 1.7376  | 0.0004968  | 0.00691745 up   |
| HOXA6        | -2.0617 | 0.00049662 | 0.00691745 down |
| PRDM16-DT    | -1.2582 | 0.00049839 | 0.00693168 down |
| SIRT4        | -1.4546 | 0.00050075 | 0.00696059 down |
| LRP8         | 2.0779  | 0.00050159 | 0.00696238 up   |
| PARP3        | -1.0379 | 0.00050148 | 0.00696238 down |
| MLPH         | -2.9353 | 0.00050355 | 0.00697971 down |
| FOSL2        | 1.4602  | 0.00050842 | 0.00703521 up   |
| SHMT2        | 1.3018  | 0.00050814 | 0.00703521 up   |
| LINC00271    | -2.0431 | 0.00051721 | 0.00713669 down |
| MIR6746      | 3.3103  | 0.00052106 | 0.00717366 up   |
| RPS6KA5      | -1.7853 | 0.00052088 | 0.00717366 down |
| FMO4         | -2.0161 | 0.00052266 | 0.00719171 down |
| SLC2A6       | 1.8163  | 0.00052391 | 0.00720084 up   |
| DPY19L2P2    | -2.2692 | 0.00052666 | 0.00722646 down |
| LINC02777    | -1.8565 | 0.00052917 | 0.0072569 down  |
| C1orf115     | -2.3965 | 0.00053169 | 0.00728728 down |
| ADAM9        | 1.1982  | 0.00053599 | 0.00733394 up   |
| LOC105377623 | -1.8161 | 0.00053712 | 0.00734129 down |
| LY6K         | 3.0629  | 0.00053688 | 0.00734129 up   |
| TKFC         | -2.5862 | 0.00053995 | 0.00734954 down |
| RPS6P1       | 2.1191  | 0.00053974 | 0.00734954 up   |
| NRCAM        | 2.4605  | 0.00054395 | 0.00739342 up   |

|              |         |            |                 |
|--------------|---------|------------|-----------------|
| FN3K         | -1.2933 | 0.00054756 | 0.00743006 down |
| SNORD89      | 1.5559  | 0.00055279 | 0.00749281 up   |
| PGM2L1       | 1.3154  | 0.00055272 | 0.00749281 up   |
| PDZD3        | -4.1790 | 0.00055845 | 0.00756533 down |
| ENO1         | 1.1662  | 0.00056037 | 0.00758713 up   |
| TOMM34       | 1.0023  | 0.00056098 | 0.00759115 up   |
| NECTIN2      | 1.0779  | 0.00056233 | 0.00759848 up   |
| LOC100130950 | -1.2880 | 0.00056303 | 0.00760218 down |
| ADA          | 1.4083  | 0.00056352 | 0.00760462 up   |
| NPTX1        | -4.4670 | 0.00056458 | 0.00761368 down |
| MMP14        | 1.3379  | 0.00056765 | 0.00763922 up   |
| NFKBIE       | 1.8641  | 0.00057171 | 0.00768931 up   |
| SLC2A1       | 2.5400  | 0.00057342 | 0.00769158 up   |
| STAM-AS1     | -2.2538 | 0.00057293 | 0.00769158 down |
| OAT          | -2.2790 | 0.00057635 | 0.00772246 down |
| ZNF443       | -1.1391 | 0.00057673 | 0.00772334 down |
| LINC01503    | 2.6502  | 0.0005786  | 0.00774413 up   |
| HAPLN3       | 1.7065  | 0.00058059 | 0.00776225 up   |
| AGAP2-AS1    | 1.2153  | 0.00058532 | 0.00781704 up   |
| ACTG1P25     | -2.8669 | 0.0005861  | 0.00782275 down |
| MEG9         | 2.0581  | 0.00058639 | 0.00782275 up   |
| METRNL       | 1.2744  | 0.00059296 | 0.0078975 up    |
| HLA-DMB      | -2.1631 | 0.0005985  | 0.00794547 down |
| CYP4V2       | -1.4488 | 0.00060294 | 0.00799577 down |
| LOC101928834 | -2.9989 | 0.00060341 | 0.00799763 down |
| VPS13A       | -1.4744 | 0.00060422 | 0.00800404 down |
| F3           | 1.5917  | 0.00060651 | 0.00803009 up   |
| DNAJA1       | 1.4888  | 0.00060704 | 0.00803272 up   |
| AMZ2P1       | -1.0185 | 0.00060927 | 0.00804914 down |
| JRK          | -1.0131 | 0.00061044 | 0.00805293 down |
| LOC102724684 | -1.8351 | 0.00061135 | 0.00805929 down |
| CYB561D2     | -2.5110 | 0.00061297 | 0.00806435 down |
| KYNU         | 2.4298  | 0.00061611 | 0.00808725 up   |
| MANF         | 1.3738  | 0.00061695 | 0.00809392 up   |
| LINC01482    | 2.8732  | 0.0006225  | 0.00816234 up   |
| FRMD3        | -1.3627 | 0.00062409 | 0.00817884 down |
| PIPOX        | -2.4236 | 0.00062479 | 0.00818368 down |
| SERPINB9     | 1.5024  | 0.00062532 | 0.00818632 up   |
| RBMS1        | 1.5230  | 0.00063012 | 0.00824031 up   |
| IFNAR2       | 1.0173  | 0.00063128 | 0.00825103 up   |
| ALDH3A2      | -1.0388 | 0.00063236 | 0.00825641 down |

|             |         |            |                 |
|-------------|---------|------------|-----------------|
| NOC3L       | 1.1023  | 0.00063453 | 0.00827832 up   |
| RTL1        | 3.5275  | 0.00063548 | 0.00828388 up   |
| FKBP11      | 1.2726  | 0.00063725 | 0.00829366 up   |
| TFPI2       | 4.0073  | 0.00063761 | 0.00829399 up   |
| PPAT        | 1.0798  | 0.000638   | 0.00829466 up   |
| SDS         | 3.0761  | 0.00063991 | 0.00831515 up   |
| CYB5RL      | -1.0228 | 0.00064069 | 0.00832087 down |
| PLPP6       | -1.2711 | 0.00064234 | 0.00833343 down |
| GOLGA2P5    | -2.3469 | 0.00064333 | 0.00833545 down |
| TMEM229A    | -4.0159 | 0.00064559 | 0.00834907 down |
| UGT2B15     | -5.2445 | 0.00064633 | 0.00835425 down |
| RAVER2      | -1.7577 | 0.00064896 | 0.00837498 down |
| MRGPRF-AS1  | -2.2485 | 0.00065801 | 0.00847398 down |
| IL18RAP     | 1.6574  | 0.00065845 | 0.00847441 up   |
| FZD7        | -1.6730 | 0.00065888 | 0.00847441 down |
| ACSM3       | -1.6060 | 0.00065933 | 0.00847441 down |
| RELA-DT     | -1.1664 | 0.00066002 | 0.00847753 down |
| COQ10B      | 1.0156  | 0.00066357 | 0.00851872 up   |
| TDP2        | -2.3101 | 0.00067345 | 0.00862744 down |
| ADGRE1      | 2.6758  | 0.0006762  | 0.0086582 up    |
| RPSAP12     | 1.5669  | 0.00068383 | 0.00873781 up   |
| CLEC4E      | 2.4400  | 0.00068472 | 0.0087444 up    |
| PDE4D       | 2.1836  | 0.00068513 | 0.00874515 up   |
| PTAFR       | 2.1932  | 0.00069177 | 0.00881149 up   |
| RASGRF2-AS1 | 1.7233  | 0.00069301 | 0.00882279 up   |
| SNORA3B     | 1.7487  | 0.00069381 | 0.00882375 up   |
| RPL26P4     | 1.4621  | 0.00069429 | 0.00882523 up   |
| RN7SL262P   | -2.5620 | 0.00069635 | 0.00882989 down |
| RNY1P16     | -3.0348 | 0.00069666 | 0.00882989 down |
| SLC43A3     | 1.4458  | 0.00069858 | 0.00884771 up   |
| ZNF589      | -1.2995 | 0.00070041 | 0.00886239 down |
| C5AR1       | 2.9531  | 0.00070118 | 0.00886239 up   |
| NHLH1       | 2.0064  | 0.00070359 | 0.00888361 up   |
| TRPV1       | -1.3946 | 0.00070327 | 0.00888361 down |
| RPS2P31     | 3.7732  | 0.00070879 | 0.0089359 up    |
| RRS1        | 1.2481  | 0.00070882 | 0.0089359 up    |
| CCDC85B     | 1.2957  | 0.00071071 | 0.00895507 up   |
| ZADH2       | -1.0399 | 0.00071366 | 0.00897844 down |
| LRRC8B      | 1.2311  | 0.0007163  | 0.00900696 up   |
| SLC7A11     | 4.1832  | 0.00071813 | 0.00902082 up   |
| VWA3B       | -2.5380 | 0.00072081 | 0.00904519 down |

|                |         |            |                 |
|----------------|---------|------------|-----------------|
| RFX8           | 3.6935  | 0.00072063 | 0.00904519 up   |
| DPP4           | -3.2097 | 0.00072291 | 0.00905475 down |
| SLC30A4        | -1.6188 | 0.00072305 | 0.00905475 down |
| TRPV6          | 4.7558  | 0.00073338 | 0.00916076 up   |
| IQCH           | 1.5653  | 0.00073594 | 0.00918328 up   |
| C10orf55       | 2.3007  | 0.00073692 | 0.00919086 up   |
| MMEL1          | -2.4670 | 0.00073811 | 0.00919648 down |
| TGFB1          | 1.2556  | 0.00073812 | 0.00919648 up   |
| ZSWIM5         | -2.1646 | 0.00073858 | 0.00919755 down |
| RN7SKP127      | -4.8905 | 0.00074037 | 0.00921518 down |
| LINC02207      | 2.0822  | 0.00074523 | 0.00926156 up   |
| TNFRSF4        | 2.1334  | 0.00075015 | 0.00929751 up   |
| C3orf36        | 3.0241  | 0.00075062 | 0.00929751 up   |
| ABCB1          | -3.1164 | 0.000749   | 0.00929751 down |
| ABO            | -2.6991 | 0.00075078 | 0.00929751 down |
| ACR            | 1.7685  | 0.00075066 | 0.00929751 up   |
| CRYZL2P-SEC16B | -2.6877 | 0.00075315 | 0.00931749 down |
| ZNF311         | -1.0783 | 0.00075526 | 0.00933883 down |
| STRADB         | -1.7242 | 0.00076171 | 0.00940439 down |
| HEXD           | -1.1009 | 0.0007625  | 0.00940866 down |
| ARRDC3         | 1.2917  | 0.00076703 | 0.00944157 up   |
| LINC01679      | 1.6995  | 0.00076829 | 0.00945226 up   |
| RPL18AP6       | 1.0834  | 0.00077221 | 0.00947236 up   |
| CDK2           | 1.1794  | 0.00077224 | 0.00947236 up   |
| LINC00330      | -4.2805 | 0.00077198 | 0.00947236 down |
| LOC101928414   | -4.2166 | 0.00077513 | 0.009503 down   |
| HSP90AA1       | 2.3665  | 0.00077738 | 0.00952111 up   |
| KCNA2          | -2.1747 | 0.00077825 | 0.00952704 down |
| MASP1          | -3.0629 | 0.00078255 | 0.00955501 down |
| ZG16           | -5.7965 | 0.00078249 | 0.00955501 down |
| SIGLEC9        | 3.0225  | 0.00078287 | 0.00955501 up   |
| INSIG1         | 1.5868  | 0.00078553 | 0.00958265 up   |
| LINC02613      | -3.3640 | 0.00078642 | 0.00958757 down |
| TTC36          | -2.5827 | 0.0007871  | 0.00958757 down |
| PHYH           | -1.2408 | 0.00078673 | 0.00958757 down |
| ANGPT2         | 2.4898  | 0.00079224 | 0.00964535 up   |
| HECW2          | 1.4017  | 0.00079402 | 0.00965269 up   |
| KHDRBS2        | -3.6144 | 0.0007939  | 0.00965269 down |
| FSIP1          | 1.6273  | 0.00079458 | 0.00965467 up   |
| ZNF385D        | 1.5024  | 0.00080029 | 0.00971446 up   |
| AKR1B1         | 1.0573  | 0.00080557 | 0.00977362 up   |

|              |         |            |                 |
|--------------|---------|------------|-----------------|
| ASB16        | -1.5664 | 0.00081286 | 0.00984398 down |
| IFIT3        | -1.3948 | 0.00081637 | 0.00987052 down |
| PFDN2        | 1.2152  | 0.00082278 | 0.00993329 up   |
| TRBV19       | -2.7763 | 0.00082894 | 0.00999296 down |
| SLC26A9      | 3.1553  | 0.00083455 | 0.01004941 up   |
| KAT2B        | -1.0026 | 0.00083485 | 0.01004941 down |
| VEGFA        | 1.5154  | 0.00083869 | 0.0100753 up    |
| XAF1         | -1.8530 | 0.00083906 | 0.0100753 down  |
| CBR1         | -2.0344 | 0.00083892 | 0.0100753 down  |
| WNT2         | 2.8602  | 0.00084111 | 0.01009492 up   |
| NFE2         | 2.9146  | 0.00084444 | 0.01011898 up   |
| PI15         | 3.8278  | 0.00084519 | 0.01011918 up   |
| TOLLIP-AS1   | -1.6386 | 0.00084714 | 0.01013266 down |
| LINC01550    | -1.9752 | 0.00085217 | 0.01017785 down |
| PHACTR1      | 1.2327  | 0.00085276 | 0.01018003 up   |
| SNHG26       | 1.0560  | 0.00085655 | 0.01022023 up   |
| CEP43        | -1.0875 | 0.00085782 | 0.01023044 down |
| PKLR         | -4.1338 | 0.00086847 | 0.01033886 down |
| DIO2         | 2.7564  | 0.00087174 | 0.01037119 up   |
| ADAMTS2      | 2.5232  | 0.00087531 | 0.01040217 up   |
| IZUMO1       | 2.5036  | 0.000875   | 0.01040217 up   |
| CYP3A7       | -3.2065 | 0.00087784 | 0.01041848 down |
| HSD11B2      | -3.8164 | 0.00087753 | 0.01041848 down |
| DNAH7        | -2.5553 | 0.00088002 | 0.01041857 down |
| PLTP         | 3.4074  | 0.00088032 | 0.01041857 up   |
| DNASE1L3     | -3.0704 | 0.00088685 | 0.0104825 down  |
| C8G          | -3.7083 | 0.00088719 | 0.0104825 down  |
| CLEC7A       | 1.5335  | 0.00088751 | 0.0104825 up    |
| LOC105375166 | -4.0479 | 0.000889   | 0.01049506 down |
| TGFB3        | 1.1858  | 0.00088967 | 0.01049793 up   |
| GZMA         | -2.5255 | 0.00089166 | 0.0105113 down  |
| SCARNA9L     | -2.2741 | 0.00089154 | 0.0105113 down  |
| RHPN1        | 1.1042  | 0.00091485 | 0.01074336 up   |
| RERG         | -2.3752 | 0.00091834 | 0.01077256 down |
| PNPLA7       | -1.1281 | 0.00092205 | 0.01080725 down |
| CLEC12B      | 2.3752  | 0.00092304 | 0.0108093 up    |
| NKAPP1       | -1.2594 | 0.00092502 | 0.01082654 down |
| RPL7AP52     | -4.6472 | 0.00092863 | 0.01085842 down |
| NNAT         | -2.5650 | 0.0009297  | 0.01086571 down |
| HAAO         | -2.3644 | 0.0009318  | 0.01088505 down |
| MTARC2       | -1.5640 | 0.00093586 | 0.01090073 down |

|              |         |            |                 |
|--------------|---------|------------|-----------------|
| PRORSD1P     | -1.0041 | 0.00093459 | 0.01090073 down |
| TRPV4        | 2.2500  | 0.00093444 | 0.01090073 up   |
| ETS2         | 1.7369  | 0.00093547 | 0.01090073 up   |
| SEMA6A       | -1.4043 | 0.00094151 | 0.01095668 down |
| SUCLG2       | -1.0503 | 0.00095161 | 0.01104214 down |
| TMEM117      | -1.2944 | 0.00095177 | 0.01104214 down |
| ZNF575       | -1.4289 | 0.0009525  | 0.01104214 down |
| AANAT        | 1.9953  | 0.00095908 | 0.01110844 up   |
| CES2         | -2.9197 | 0.00096097 | 0.01111986 down |
| TMEM254      | -1.0148 | 0.00096342 | 0.01114296 down |
| BTG3         | 1.3462  | 0.00096766 | 0.01118147 up   |
| PDIA6        | 1.0693  | 0.00096876 | 0.01118883 up   |
| PNPLA3       | 1.9412  | 0.00097532 | 0.01125404 up   |
| IER5         | 2.0827  | 0.00098355 | 0.01133306 up   |
| BARX1        | 3.7929  | 0.00098549 | 0.01133642 up   |
| ACY3         | -4.6500 | 0.0009879  | 0.01135116 down |
| SLC1A7       | -2.0198 | 0.00099212 | 0.01139432 down |
| ABCA10       | -2.0355 | 0.00099687 | 0.01144347 down |
| NT5DC2       | 1.0162  | 0.00100306 | 0.01150064 up   |
| PLLP         | -2.1336 | 0.00100504 | 0.01151186 down |
| LRRC26       | -4.5997 | 0.00100754 | 0.01152086 down |
| LOC112268292 | -1.8127 | 0.00100784 | 0.01152086 down |
| ADHFE1       | -1.3720 | 0.00101028 | 0.01154342 down |
| MT1A         | 2.6279  | 0.00101153 | 0.01155227 up   |
| TUBA1C       | 1.3930  | 0.00101208 | 0.01155317 up   |
| SLC15A1      | -4.9680 | 0.00101449 | 0.01157529 down |
| LINC00520    | 5.1575  | 0.00101659 | 0.01158846 up   |
| GSTM5        | -1.9272 | 0.00101878 | 0.01160809 down |
| S100A11      | 1.8582  | 0.00102809 | 0.01169992 up   |
| NR1I3        | -2.5190 | 0.00102828 | 0.01169992 down |
| MSC          | 2.2184  | 0.00102927 | 0.01170033 up   |
| PRXL2C       | 1.2954  | 0.00102913 | 0.01170033 up   |
| PYGB         | -1.3223 | 0.00104315 | 0.01184168 down |
| C5orf63      | -1.0863 | 0.00104474 | 0.01185082 down |
| SRP14-AS1    | -1.1774 | 0.00104492 | 0.01185082 down |
| PLEKHG1      | 1.1982  | 0.00104614 | 0.01185367 up   |
| EMP1         | 2.4820  | 0.00104567 | 0.01185367 up   |
| LINC02177    | -4.0887 | 0.00105899 | 0.01197157 down |
| OCEL1        | -1.0726 | 0.00106664 | 0.01204144 down |
| TNFRSF10A    | 1.3709  | 0.00107546 | 0.01213537 up   |
| BASP1        | 1.5504  | 0.00109724 | 0.01235275 up   |



|              |         |            |                 |
|--------------|---------|------------|-----------------|
| LOC106660606 | -1.8835 | 0.00109788 | 0.01235434 down |
| FAM20A       | 2.5645  | 0.00110246 | 0.01239443 up   |
| RAB27B       | -2.3281 | 0.00110707 | 0.01244054 down |
| PITPNC1      | 1.3053  | 0.00110777 | 0.01244277 up   |
| QPRT         | -1.7181 | 0.00110874 | 0.01244797 down |
| ABCD1        | -1.3089 | 0.00110933 | 0.01244887 down |
| EPGN         | 4.2592  | 0.00111615 | 0.01249767 up   |
| THY1         | 1.8436  | 0.00111486 | 0.01249767 up   |
| LRRC75A      | -3.0577 | 0.00111889 | 0.01251604 down |
| PXDC1        | 1.1190  | 0.00112105 | 0.01253452 up   |
| LOC107987457 | 1.3616  | 0.00112369 | 0.01255254 up   |
| USP36        | 1.0513  | 0.00112884 | 0.01259291 up   |
| HSPD1        | 2.0769  | 0.00114546 | 0.01273775 up   |
| LINC00654    | -1.2452 | 0.0011569  | 0.01283587 down |
| FBP1         | -2.9776 | 0.00116008 | 0.0128653 down  |
| CXXC4-AS1    | -2.5046 | 0.0011647  | 0.01290489 down |
| SEC1P        | -2.3384 | 0.00116596 | 0.01291297 down |
| HIF1A-AS3    | 2.7098  | 0.00117123 | 0.01296548 up   |
| SLC16A3      | 1.6686  | 0.0011719  | 0.01296709 up   |
| CGAS         | 2.0298  | 0.00118506 | 0.01309006 up   |
| ADAM1B       | -2.2787 | 0.00118515 | 0.01309006 down |
| SH2B3        | 1.4471  | 0.00119064 | 0.01314475 up   |
| SLC51A       | -3.0243 | 0.00119493 | 0.01318025 down |
| SMIM38       | -2.8821 | 0.00119654 | 0.01319204 down |
| RPLP0P2      | 1.0749  | 0.00119752 | 0.01319695 up   |
| CREB5        | 1.5347  | 0.00119931 | 0.01321069 up   |
| SOX7         | 1.9255  | 0.00121299 | 0.01334347 up   |
| OSBPL7       | -1.8695 | 0.00121371 | 0.01334347 down |
| SRM          | 1.2806  | 0.00121767 | 0.01336903 up   |
| ANO7         | -3.0076 | 0.00122072 | 0.01336903 down |
| SNORA33      | 1.5297  | 0.00121834 | 0.01336903 up   |
| KBTBD11      | -1.8958 | 0.00121983 | 0.01336903 down |
| CYP2C19      | -5.1344 | 0.00121979 | 0.01336903 down |
| KCTD10       | 1.1831  | 0.00122053 | 0.01336903 up   |
| PTN          | -2.2530 | 0.00122744 | 0.0134205 down  |
| LINC00294    | -1.1867 | 0.00122702 | 0.0134205 down  |
| ART5         | -2.3151 | 0.00123714 | 0.01350012 down |
| ALDH5A1      | -1.6009 | 0.00124494 | 0.01357315 down |
| SMIM24       | -4.3925 | 0.00125062 | 0.01361691 down |
| RPL28P2      | -3.4242 | 0.001258   | 0.01366687 down |
| PTGDS        | -2.2326 | 0.00126016 | 0.01368425 down |

|              |         |            |                 |
|--------------|---------|------------|-----------------|
| NOXA1        | -1.9138 | 0.00126853 | 0.01376303 down |
| EEF1AKMT4    | 1.5848  | 0.00127632 | 0.01381886 up   |
| LINC00893    | -1.3168 | 0.0012765  | 0.01381886 down |
| LINC00479    | -4.1702 | 0.00128305 | 0.01385309 down |
| FAM157A      | 1.8607  | 0.00129353 | 0.01396007 up   |
| BTNL3        | -4.5074 | 0.00130403 | 0.01403851 down |
| LINC00173    | -1.5238 | 0.00130327 | 0.01403851 down |
| SNORA31      | 1.9583  | 0.00130353 | 0.01403851 up   |
| SKIDA1       | -2.1027 | 0.0013078  | 0.01407073 down |
| CAMSAP2      | 1.1852  | 0.0013098  | 0.01408614 up   |
| NEURL3       | -3.0771 | 0.00131225 | 0.01410628 down |
| TMEM220-AS1  | -2.1096 | 0.00131851 | 0.01416109 down |
| NPY6R        | -4.1241 | 0.00131951 | 0.01416236 down |
| SERTAD2      | 1.0002  | 0.00132074 | 0.01416645 up   |
| OPCML        | -2.1371 | 0.0013306  | 0.01425973 down |
| FAM47E       | -2.1533 | 0.00133954 | 0.01432575 down |
| RANGAP1      | 1.2103  | 0.00133968 | 0.01432575 up   |
| LINC01625    | -3.5642 | 0.00134156 | 0.01433407 down |
| RASGRP4      | 1.9183  | 0.00134163 | 0.01433407 up   |
| C22orf34     | 1.4013  | 0.0013434  | 0.01434674 up   |
| ARSJ         | 1.6867  | 0.00134996 | 0.01440428 up   |
| LOC339874    | -2.5110 | 0.00135281 | 0.01442208 down |
| LOC729558    | -4.5167 | 0.0013528  | 0.01442208 down |
| SEPSECS      | -1.4147 | 0.00135422 | 0.01443087 down |
| SATB2-AS1    | -2.7758 | 0.00135669 | 0.01445094 down |
| PRDM1        | 1.5915  | 0.00136155 | 0.01449642 up   |
| RAB17        | -3.6779 | 0.00136374 | 0.01451336 down |
| FLVCR1       | -2.2326 | 0.00138082 | 0.01466977 down |
| HGF          | 1.6564  | 0.00138198 | 0.01467571 up   |
| RAB32        | 1.1540  | 0.00139094 | 0.01476447 up   |
| CBX8         | 1.4156  | 0.00139156 | 0.01476465 up   |
| SDR42E1      | -2.2021 | 0.0013924  | 0.0147672 down  |
| HAPLN2       | -3.0048 | 0.00139878 | 0.01482034 down |
| TMSB4XP4     | 1.1547  | 0.00139826 | 0.01482034 up   |
| FOSB         | 2.7989  | 0.00139923 | 0.01482034 up   |
| LOC101929532 | 2.4029  | 0.00140054 | 0.01482781 up   |
| ENTPD8       | -4.5106 | 0.00140247 | 0.01483501 down |
| CAPS         | -1.1299 | 0.0014045  | 0.01484408 down |
| KLHDC7A      | -3.1454 | 0.00140764 | 0.01487093 down |
| FGF9         | -2.2477 | 0.00141152 | 0.0149055 down  |
| ZNF396       | -1.0418 | 0.00141459 | 0.01493143 down |

|              |         |            |                 |
|--------------|---------|------------|-----------------|
| MDM1         | -1.1325 | 0.00141814 | 0.01496253 down |
| CALU         | 1.5498  | 0.00142178 | 0.01499444 up   |
| POLR1G       | 1.5338  | 0.0014275  | 0.01504181 up   |
| PTK7         | 1.2822  | 0.00143244 | 0.01508088 up   |
| SH2D5        | 5.2459  | 0.00143396 | 0.01508398 up   |
| MPO          | 2.4312  | 0.00143727 | 0.0151123 up    |
| H1-2         | 1.3972  | 0.00143832 | 0.01511687 up   |
| MPST         | -1.8465 | 0.00144807 | 0.0152063 down  |
| ZNF821       | -1.3196 | 0.00144939 | 0.01521367 down |
| IFITM3       | 1.5107  | 0.00145792 | 0.0152901 up    |
| FREM2        | -3.2199 | 0.00145943 | 0.01529937 down |
| ALG1L9P      | -1.2794 | 0.00147046 | 0.0153952 down  |
| LOC101928940 | 3.1240  | 0.00147698 | 0.0154569 up    |
| LRRC28       | -1.2806 | 0.00148098 | 0.01549212 down |
| CACFD1       | -1.3904 | 0.00148774 | 0.01554297 down |
| GPR42        | 3.0962  | 0.00149465 | 0.01560191 up   |
| CYP2C18      | -5.3896 | 0.00149735 | 0.01562017 down |
| PDIA4        | 1.3969  | 0.00149983 | 0.01563601 up   |
| MAP4K4       | 1.0594  | 0.00150484 | 0.01568153 up   |
| PHETA1       | -1.8360 | 0.00150653 | 0.01569247 down |
| MISP3        | -2.2769 | 0.00150912 | 0.01569944 down |
| STING1       | 1.2003  | 0.00154542 | 0.0160256 up    |
| MSANTD3      | 1.6200  | 0.00154942 | 0.01605744 up   |
| CIB2         | -1.5293 | 0.0015684  | 0.01621294 down |
| LOC100506725 | -2.1754 | 0.00156923 | 0.01621474 down |
| MIR3682      | 1.9102  | 0.00157744 | 0.01626723 up   |
| ACSM1        | -2.0029 | 0.00157763 | 0.01626723 down |
| SLC1A1       | -2.6550 | 0.00157865 | 0.01627091 down |
| ELOC         | 1.1467  | 0.00158144 | 0.01629281 up   |
| FAM43A       | 1.5972  | 0.00158278 | 0.01629294 up   |
| CLYBL        | -1.4372 | 0.00158227 | 0.01629294 down |
| GK5          | -1.1053 | 0.00158815 | 0.01631185 down |
| GDPD3        | -1.3512 | 0.00158861 | 0.01631185 down |
| HSP90AA6P    | 2.6446  | 0.0015923  | 0.0163429 up    |
| PRAP1        | -4.1581 | 0.00159471 | 0.01635392 down |
| LOC101930370 | -1.1669 | 0.00159929 | 0.01639402 down |
| ANGPTL7      | -2.6912 | 0.00160716 | 0.01644728 down |
| FAM229A      | -1.0877 | 0.00161267 | 0.01648986 down |
| TGFBR3L      | -2.8900 | 0.00162044 | 0.01655547 down |
| ZNF491       | -1.1533 | 0.00162167 | 0.01656114 down |
| AATK         | -1.5521 | 0.00163844 | 0.0166976 down  |

|              |         |            |                 |
|--------------|---------|------------|-----------------|
| SYT2         | -1.0654 | 0.00164174 | 0.01671734 down |
| ITGBL1       | 2.5226  | 0.00164347 | 0.01672804 up   |
| ANKRD23      | -1.3396 | 0.00165008 | 0.01676283 down |
| GALNT18      | 1.8450  | 0.00164979 | 0.01676283 up   |
| BEST4        | -3.1092 | 0.00165374 | 0.01679073 down |
| KCTD21-AS1   | -1.4173 | 0.00165567 | 0.01680343 down |
| ABCC2        | -2.7165 | 0.00165712 | 0.01680687 down |
| EIF4A1P4     | 1.0881  | 0.00165784 | 0.01680687 up   |
| COLGALT1     | 1.2178  | 0.00166388 | 0.01684489 up   |
| CHST1        | 1.6844  | 0.00166636 | 0.01685612 up   |
| RNF175       | 1.5417  | 0.0016676  | 0.01686172 up   |
| CAPN10-DT    | -1.3228 | 0.00166977 | 0.01687663 down |
| HERC6        | -1.5434 | 0.00167319 | 0.01690428 down |
| CDC42EP1     | 1.0561  | 0.00168668 | 0.01697754 up   |
| ERN1         | 1.2102  | 0.00169109 | 0.01700797 up   |
| BGN          | 2.1604  | 0.00169594 | 0.01704482 up   |
| SOWAHA       | -4.3106 | 0.00170042 | 0.0170808 down  |
| RIN1         | 1.6222  | 0.00171007 | 0.01715663 up   |
| LONRF3       | 1.0582  | 0.00171418 | 0.01718197 up   |
| CYP2C9       | -4.5365 | 0.00171469 | 0.01718197 down |
| ELK3         | 1.3327  | 0.00171418 | 0.01718197 up   |
| ZSCAN26      | -1.0537 | 0.00171807 | 0.01720081 down |
| SLC47A2      | -2.5386 | 0.00171877 | 0.01720081 down |
| SYT7         | -1.1807 | 0.00172075 | 0.01720747 down |
| PROC         | -2.7618 | 0.00172179 | 0.01721091 down |
| KRT80        | 4.4228  | 0.00172753 | 0.01725418 up   |
| LOC101929657 | -2.2611 | 0.00173378 | 0.01730957 down |
| ATP6V0C      | 1.3679  | 0.00173656 | 0.01733028 up   |
| LINC01426    | 2.6373  | 0.0017396  | 0.01734413 up   |
| SCAMP5       | -2.1762 | 0.00174868 | 0.0174087 down  |
| RILP         | -1.3638 | 0.00175729 | 0.01748023 down |
| POM121L9P    | 1.8979  | 0.00176318 | 0.01752459 up   |
| RPS4XP7      | -2.7303 | 0.00177078 | 0.01759299 down |
| DNAJB11      | 1.0297  | 0.00178236 | 0.01769371 up   |
| IGSF23       | -3.8808 | 0.00178702 | 0.01772558 down |
| ATOH1        | -5.1561 | 0.00178901 | 0.01773819 down |
| PTGR2        | -1.3392 | 0.00179126 | 0.0177461 down  |
| GRAMD1C      | -3.0982 | 0.00180326 | 0.01782896 down |
| ERO1A        | 1.7868  | 0.00180547 | 0.01784366 up   |
| ZNF763       | -1.5903 | 0.00181439 | 0.01791739 down |
| ANGPTL4      | 2.2918  | 0.00181715 | 0.01793534 up   |

|              |         |            |                 |
|--------------|---------|------------|-----------------|
| TAF1A-AS1    | -1.5935 | 0.0018192  | 0.01794317 down |
| LOC100133286 | -3.6056 | 0.00182161 | 0.01794532 down |
| SIRPB2       | 2.7023  | 0.00182301 | 0.0179519 up    |
| LOC100507156 | 1.8175  | 0.00182504 | 0.01796383 up   |
| DNAJC3-DT    | -1.0419 | 0.00183441 | 0.01804245 down |
| DAND5        | -3.0438 | 0.00183524 | 0.01804333 down |
| SFI1         | -1.5370 | 0.00184623 | 0.01812233 down |
| LINC00937    | 2.6017  | 0.0018502  | 0.01814413 up   |
| CYP1B1       | 2.6366  | 0.00185577 | 0.01817958 up   |
| ACO2         | -1.2090 | 0.00186611 | 0.01827359 down |
| SYTL2        | -1.4213 | 0.00187956 | 0.01838327 down |
| MIDN         | 1.3244  | 0.00189027 | 0.01847331 up   |
| FXYD3        | -4.2742 | 0.00189412 | 0.01850355 down |
| ENTPD2       | -2.6346 | 0.0018977  | 0.01851411 down |
| B3GALT5      | -4.1393 | 0.00189685 | 0.01851411 down |
| ASRGL1       | 1.4446  | 0.00190614 | 0.01856912 up   |
| LOC100506497 | -1.9898 | 0.00190892 | 0.0185815 down  |
| SHROOM4      | 1.8060  | 0.00190891 | 0.0185815 up    |
| NT5DC1       | -1.0877 | 0.00191524 | 0.01863562 down |
| DELEC1       | 2.8516  | 0.00192274 | 0.01869269 up   |
| SLC25A45     | -1.7014 | 0.0019234  | 0.01869269 down |
| CSF2RA       | 1.4001  | 0.00192907 | 0.01873376 up   |
| CYP19A1      | 2.2915  | 0.00192932 | 0.01873376 up   |
| NAALAD2      | -1.2974 | 0.00193158 | 0.0187425 down  |
| DCLRE1B      | 1.3053  | 0.0019347  | 0.01876533 up   |
| HAGLR        | -1.8059 | 0.00195086 | 0.01889971 down |
| MYL9         | -2.5119 | 0.0019554  | 0.01893619 down |
| RN7SL600P    | 1.9502  | 0.0019574  | 0.01894807 up   |
| RAI14        | 1.8862  | 0.001974   | 0.01907859 up   |
| VWC2         | -3.4394 | 0.00197557 | 0.01907879 down |
| ASB13        | -1.4077 | 0.00197488 | 0.01907879 down |
| SEMA6D       | -1.9531 | 0.00197719 | 0.01908691 down |
| KCNE4        | 2.6479  | 0.00199626 | 0.01921798 up   |
| CD8B         | -2.2367 | 0.00199808 | 0.01922803 down |
| CYP4F3       | -3.2187 | 0.00200026 | 0.01923245 down |
| PRLR         | -2.8574 | 0.00200331 | 0.01924058 down |
| IFITM10      | 1.6883  | 0.00201178 | 0.01928413 up   |
| ACSF2        | -2.0177 | 0.00201648 | 0.01931408 down |
| GPT          | -2.6308 | 0.00203352 | 0.01943933 down |
| ZNF767P      | -1.1244 | 0.00203557 | 0.01945132 down |
| EPHA2        | 2.3058  | 0.00203656 | 0.01945321 up   |

|              |         |            |                 |
|--------------|---------|------------|-----------------|
| LOC100240735 | -2.1279 | 0.00204488 | 0.01951754 down |
| SEC14L6      | -1.8040 | 0.00204903 | 0.01954186 down |
| NCKAP5       | -2.1952 | 0.00206146 | 0.01965281 down |
| TMEM98       | -1.7917 | 0.00206238 | 0.01965391 down |
| PNMA3        | -1.3623 | 0.00206712 | 0.0196838 down  |
| CLIC6        | 1.6056  | 0.00207327 | 0.019727 up     |
| NLRC4        | 2.1690  | 0.00208689 | 0.0198335 up    |
| TMEM35A      | -2.9641 | 0.00208641 | 0.0198335 down  |
| TIAM2        | -1.4322 | 0.00209034 | 0.01985865 down |
| GATM         | -2.1336 | 0.00209267 | 0.01987311 down |
| RPS17        | 1.1050  | 0.00209369 | 0.01987505 up   |
| ERVMER34-1   | 2.0923  | 0.0020972  | 0.01990072 up   |
| FCER1G       | 2.3693  | 0.00211141 | 0.01998911 up   |
| DOCK4        | 1.1923  | 0.00211116 | 0.01998911 up   |
| SEC14L1      | 1.1769  | 0.00211106 | 0.01998911 up   |
| FAM3D-AS1    | -3.2393 | 0.00211433 | 0.01999971 down |
| SLC2A12      | -2.3606 | 0.00211498 | 0.01999971 down |
| MIR145       | -3.1719 | 0.00211779 | 0.02001528 down |
| NKX3-2       | -2.3540 | 0.00212218 | 0.02004459 down |
| HLA-DRA      | -1.7072 | 0.00212974 | 0.02009285 down |
| SLC10A5      | -2.1170 | 0.00214117 | 0.02019287 down |
| CLEC1B       | 3.4266  | 0.0021446  | 0.0202175 up    |
| GDF15        | 2.4101  | 0.00215121 | 0.02026417 up   |
| LOXL2        | 1.6088  | 0.00216112 | 0.02033412 up   |
| ZNF664       | -1.0477 | 0.00216101 | 0.02033412 down |
| PECR         | -1.6410 | 0.00216355 | 0.02033578 down |
| TACSTD2      | 1.8587  | 0.00217057 | 0.0203666 up    |
| SLA          | 1.8298  | 0.0021722  | 0.0203666 up    |
| CPNE8        | 1.1396  | 0.0021713  | 0.0203666 up    |
| CHRNE        | 1.8541  | 0.00217487 | 0.02037749 up   |
| LAMC3        | 1.6028  | 0.0021817  | 0.02043365 up   |
| CD1E         | -3.1400 | 0.0021891  | 0.02048728 down |
| CYP21A1P     | 1.3782  | 0.00218871 | 0.02048728 up   |
| C1QTNF12     | -2.4622 | 0.00219042 | 0.02049185 down |
| THEMIS2      | 1.9284  | 0.00219199 | 0.02049465 up   |
| SAT2         | -1.3121 | 0.00219768 | 0.02052056 down |
| HNF4G        | -4.3572 | 0.00220354 | 0.02056746 down |
| PVT1         | 1.4511  | 0.00220853 | 0.02059055 up   |
| PLCB4        | -1.0258 | 0.00221337 | 0.02062786 down |
| ALDOB        | -4.9252 | 0.002216   | 0.02064448 down |
| FRK          | -2.6092 | 0.00221885 | 0.02064988 down |

|              |         |            |                 |
|--------------|---------|------------|-----------------|
| FOXH1        | -3.3546 | 0.00223174 | 0.02074162 down |
| EXOC3L4      | -2.8669 | 0.0022387  | 0.02078494 down |
| TUBA1B       | 1.1700  | 0.00224704 | 0.02085441 up   |
| LINC01138    | -1.1752 | 0.00224797 | 0.02085519 down |
| NKRF         | 1.5583  | 0.00226458 | 0.02096958 up   |
| LOC102724064 | -2.7623 | 0.00227708 | 0.02107738 down |
| MIR186       | -1.4086 | 0.00228427 | 0.02112002 down |
| DRP2         | -3.2836 | 0.00228525 | 0.02112112 down |
| ACOT11       | -2.4829 | 0.0022884  | 0.02112245 down |
| GSDME        | -1.7849 | 0.00228761 | 0.02112245 down |
| RPL23AP66    | -2.5232 | 0.00228777 | 0.02112245 down |
| MDK          | -1.6698 | 0.00229163 | 0.0211255 down  |
| DLC1         | 1.6749  | 0.00229424 | 0.02113738 up   |
| NAAA         | -2.1281 | 0.00230218 | 0.02119538 down |
| LOC644135    | 2.4828  | 0.00231211 | 0.0212413 up    |
| MAT1A        | 3.3802  | 0.00231802 | 0.0212876 up    |
| CROCCP3      | -1.1841 | 0.00232898 | 0.02134235 down |
| XKRX         | -3.1323 | 0.00233104 | 0.02134321 down |
| TPM1         | -2.5500 | 0.00233064 | 0.02134321 down |
| LRRC32       | 1.9812  | 0.00233997 | 0.02140098 up   |
| KLK14        | 2.7340  | 0.00233962 | 0.02140098 up   |
| ZNF784       | -1.0572 | 0.00235002 | 0.02146086 down |
| ABCD3        | -1.1506 | 0.00235422 | 0.02147074 down |
| HSD17B11     | -1.7877 | 0.00235446 | 0.02147074 down |
| SELENOP      | -2.6450 | 0.0023546  | 0.02147074 down |
| SLC25A5-AS1  | -1.1242 | 0.00236128 | 0.02150312 down |
| RPL10P3      | 1.3002  | 0.00236039 | 0.02150312 up   |
| IL15RA       | 1.0922  | 0.00236166 | 0.02150312 up   |
| RNF208       | -1.0582 | 0.00236587 | 0.02153347 down |
| PPP3CB-AS1   | -1.0880 | 0.00237121 | 0.02156608 down |
| SALL2        | -2.4854 | 0.00238007 | 0.02163062 down |
| MIA2         | -1.9403 | 0.00240365 | 0.02182866 down |
| PIK3R5       | 1.9193  | 0.00240547 | 0.02183717 up   |
| SLC38A5      | 1.5720  | 0.00241507 | 0.02189959 up   |
| MTMR11       | -2.3909 | 0.00241747 | 0.02190557 down |
| PKD1L2       | -2.3030 | 0.00242142 | 0.02193326 down |
| ZZEF1        | -1.4175 | 0.00242392 | 0.02193967 down |
| UGT1A10      | -4.8814 | 0.00242799 | 0.02196842 down |
| PPP1R16A     | -1.7008 | 0.00242939 | 0.02197294 down |
| ACTRT3       | 2.4849  | 0.00244779 | 0.02209787 up   |
| TMEM106C     | -1.5052 | 0.00244916 | 0.02209787 down |

|              |         |            |                 |
|--------------|---------|------------|-----------------|
| CILP2        | 1.9352  | 0.00245036 | 0.02209787 up   |
| STIP1        | 1.1818  | 0.00246867 | 0.02223799 up   |
| NKX3-1       | 1.9555  | 0.00247268 | 0.0222659 up    |
| TYMP         | 1.5243  | 0.0024759  | 0.02228672 up   |
| BDH2         | -1.4234 | 0.00247871 | 0.02230383 down |
| CAPN6        | -2.1783 | 0.00248527 | 0.02234648 down |
| LILRA6       | 2.7811  | 0.0024869  | 0.02235296 up   |
| RASGRF1      | -1.9090 | 0.00249278 | 0.02238938 down |
| KRT23        | 1.8809  | 0.00250207 | 0.02244814 up   |
| LOC100507283 | -1.0774 | 0.00250549 | 0.02246242 down |
| RHOXF1       | -3.1925 | 0.00252681 | 0.02261215 down |
| GPC1         | 1.4876  | 0.00253572 | 0.02265058 up   |
| TCTEX1D1     | 1.6607  | 0.00254799 | 0.02272706 up   |
| B4GALT4      | -1.4150 | 0.00255336 | 0.02276665 down |
| AKAP1        | -1.1712 | 0.00256229 | 0.02283803 down |
| EFCAB5       | -2.2367 | 0.00256929 | 0.02289208 down |
| LXN          | 1.4424  | 0.00259391 | 0.02305123 up   |
| SAT1         | 1.2584  | 0.00259336 | 0.02305123 up   |
| FCGR3A       | 3.0171  | 0.00260672 | 0.02313311 up   |
| BEND5        | -1.7345 | 0.00262068 | 0.02324023 down |
| TMEM116      | -1.3670 | 0.0026235  | 0.02325675 down |
| RPL19P6      | -1.3502 | 0.00262843 | 0.02329207 down |
| ZBED5-AS1    | -1.4461 | 0.00263474 | 0.02332265 down |
| NR1H4        | -4.5762 | 0.00263391 | 0.02332265 down |
| GALNT2       | 1.2888  | 0.0026535  | 0.02346332 up   |
| UBA7         | -1.1642 | 0.00266244 | 0.02352539 down |
| CRYL1        | -1.8499 | 0.00266834 | 0.02356905 down |
| CCDC17       | -1.1696 | 0.00267264 | 0.02358771 down |
| STAG3L5P     | -1.0723 | 0.00267199 | 0.02358771 down |
| NOS3         | 1.9798  | 0.00268481 | 0.02363793 up   |
| ENPP7P11     | -3.4848 | 0.0026982  | 0.02373025 down |
| CD74         | -1.5610 | 0.00270669 | 0.02378619 down |
| SDHAP2       | -1.1202 | 0.00270999 | 0.02379127 down |
| GDA          | -4.5256 | 0.00271526 | 0.02382044 down |
| LINC01668    | -2.1433 | 0.00272101 | 0.02385387 down |
| LEAP2        | -2.9754 | 0.00273639 | 0.02398011 down |
| GPR82        | -2.7541 | 0.00273951 | 0.02399887 down |
| PLIN2        | 1.6030  | 0.00274184 | 0.0240021 up    |
| FNDC3B       | 1.1788  | 0.00275042 | 0.02406863 up   |
| CXXC4        | -2.1334 | 0.00275751 | 0.02411348 down |
| ENDOU        | 2.3003  | 0.00275747 | 0.02411348 up   |



|             |         |            |                 |
|-------------|---------|------------|-----------------|
| CYP27B1     | 1.9806  | 0.00276147 | 0.02413091 up   |
| SUSD2       | -2.4731 | 0.00276488 | 0.02414344 down |
| MYH11       | -3.3208 | 0.0027665  | 0.02414431 down |
| LINC01940   | 3.0239  | 0.0027681  | 0.02414583 up   |
| ZNF385D-AS1 | 2.2731  | 0.00277443 | 0.02419237 up   |
| SNORA73B    | 2.1100  | 0.00278454 | 0.02427191 up   |
| DUSP19      | -1.3228 | 0.00278653 | 0.02427202 down |
| TUBAP14     | 3.3050  | 0.00278639 | 0.02427202 up   |
| UGT2B7      | -4.7343 | 0.00279009 | 0.02429435 down |
| C11orf80    | -1.7377 | 0.00279867 | 0.02435181 down |
| ARSG        | 1.0783  | 0.00280344 | 0.02436735 up   |
| MROH3P      | -4.2787 | 0.00280727 | 0.02437473 down |
| MAP10       | -1.0607 | 0.002811   | 0.02438295 down |
| TNFAIP2     | 2.1873  | 0.0028112  | 0.02438295 up   |
| APOLD1      | 2.0550  | 0.00281723 | 0.02441798 up   |
| TNN         | -2.6801 | 0.00282868 | 0.02449839 down |
| NELL2       | -2.5666 | 0.0028295  | 0.02449839 down |
| LOC441204   | -1.7162 | 0.00284359 | 0.02458561 down |
| STAR        | 2.1681  | 0.00284821 | 0.02460821 up   |
| SNORD46     | 1.7941  | 0.00285019 | 0.02461558 up   |
| ANPEP       | -3.4168 | 0.00286    | 0.02466659 down |
| KLHL32      | -2.5691 | 0.00286692 | 0.02470028 down |
| PEPD        | -1.5905 | 0.00288872 | 0.02484441 down |
| ADM         | 2.1654  | 0.0028907  | 0.0248527 up    |
| SERPINA3    | 2.7241  | 0.00289536 | 0.02488406 up   |
| CKB         | -2.4790 | 0.00289751 | 0.02489385 down |
| A3GALT2     | 2.7869  | 0.00290384 | 0.02493069 up   |
| KBTBD11-OT1 | -4.0437 | 0.00290891 | 0.02494803 down |
| FAHD2A      | -1.0092 | 0.00291274 | 0.02496087 down |
| ELL3        | -2.7032 | 0.00291653 | 0.02497845 down |
| SLC9A3R1    | -2.5167 | 0.00297794 | 0.02542449 down |
| ALB         | -1.6420 | 0.00298219 | 0.02545193 down |
| MAFTRR      | -2.1111 | 0.00298335 | 0.02545294 down |
| CELP        | -4.4299 | 0.00298965 | 0.02548843 down |
| CYP2D7      | -1.7360 | 0.00299117 | 0.02548843 down |
| PBX1        | -1.3943 | 0.00299324 | 0.025493 down   |
| GALM        | -1.4778 | 0.00299771 | 0.0255133 down  |
| RPS2P28     | 3.2593  | 0.00299694 | 0.0255133 up    |
| EDN3        | -3.5902 | 0.00300803 | 0.02557453 down |
| CTRB1       | 2.5762  | 0.00301259 | 0.02560441 up   |
| TFRC        | 1.2864  | 0.00302017 | 0.02563927 up   |

|            |         |            |                 |
|------------|---------|------------|-----------------|
| TRIM2      | -1.2498 | 0.00302017 | 0.02563927 down |
| BCKDHB     | -1.1838 | 0.00302577 | 0.02566306 down |
| STK33      | -2.3104 | 0.00302566 | 0.02566306 down |
| ANKRD9     | -1.4300 | 0.0030309  | 0.02568877 down |
| TMEM92-AS1 | -2.8200 | 0.00303005 | 0.02568877 down |
| FLVCR1-DT  | -1.6743 | 0.00304761 | 0.02581261 down |
| BAZ1A      | 1.0229  | 0.00305564 | 0.02586269 up   |
| MYBPC1     | -2.7974 | 0.00305877 | 0.02588032 down |
| AMT        | -1.8521 | 0.00306123 | 0.02589219 down |
| CYP3A4     | -5.4948 | 0.00306393 | 0.02589717 down |
| SPEF2      | -1.0093 | 0.00307023 | 0.02594146 down |
| ZNF33B     | -1.4361 | 0.00307654 | 0.02598581 down |
| VAMP1      | -1.2081 | 0.0030789  | 0.02598784 down |
| OLIG1      | 2.7611  | 0.00308384 | 0.02600267 up   |
| DCST2      | -1.7140 | 0.00309099 | 0.02604503 down |
| TREML2     | 1.9605  | 0.00310649 | 0.02615763 up   |
| HADH       | -1.3471 | 0.00311273 | 0.02620124 down |
| KIF19      | 1.2638  | 0.00311406 | 0.0262034 up    |
| DCST1      | -2.0385 | 0.0031197  | 0.02623285 down |
| DUSP2      | 1.7509  | 0.00311875 | 0.02623285 up   |
| TUBB1      | 1.5944  | 0.00312145 | 0.02623856 up   |
| ESRRG      | -2.0371 | 0.00312354 | 0.02624119 down |
| ALDH2      | -1.5016 | 0.00312513 | 0.02624119 down |
| ANG        | -1.2426 | 0.00312604 | 0.02624119 down |
| GSDMA      | 3.4337  | 0.00312464 | 0.02624119 up   |
| TAMALIN    | 1.3961  | 0.00313061 | 0.02627054 up   |
| OXER1      | -2.2287 | 0.0031506  | 0.02641117 down |
| EIF4A1P6   | 2.5542  | 0.00316169 | 0.02648464 up   |
| CLIC5      | -2.3239 | 0.00317135 | 0.02654262 down |
| SLC16A11   | -1.2519 | 0.00317482 | 0.02655274 down |
| FER1L4     | 2.5615  | 0.00317615 | 0.02655274 up   |
| PRR5L      | -1.6559 | 0.00319961 | 0.02672157 down |
| ZNF594     | -1.2661 | 0.00320882 | 0.02676196 down |
| FST        | 1.9957  | 0.00321611 | 0.0268137 up    |
| EDNRA      | 1.3286  | 0.00322799 | 0.02687709 up   |
| DCAF11     | -1.2971 | 0.0032292  | 0.02687709 down |
| ANKRD63    | -3.3564 | 0.00322815 | 0.02687709 down |
| AGMO       | -3.2019 | 0.00323871 | 0.02692888 down |
| BATF       | 1.6696  | 0.00324197 | 0.02694684 up   |
| ZNF704     | -1.1962 | 0.00324339 | 0.0269495 down  |
| SQLE       | 1.3895  | 0.00325723 | 0.02703696 up   |

|              |         |            |                 |
|--------------|---------|------------|-----------------|
| PSD          | -3.3727 | 0.0032594  | 0.02704589 down |
| SIGLEC6      | -1.9579 | 0.00327079 | 0.02713118 down |
| SLC2A14      | 2.2847  | 0.00327388 | 0.02714766 up   |
| CMA1         | -3.0485 | 0.00328019 | 0.02718155 down |
| LOC107984265 | -2.0557 | 0.00328788 | 0.02721766 down |
| TSPAN12      | -1.8077 | 0.00329866 | 0.02728851 down |
| RN7SL473P    | 2.1012  | 0.00330946 | 0.02735018 up   |
| REEP6        | -3.2568 | 0.00331247 | 0.02735661 down |
| FSCN1        | 1.4028  | 0.00333566 | 0.0275018 up    |
| CALR         | 1.0682  | 0.00333933 | 0.0275228 up    |
| WDR87BP      | -3.4029 | 0.00334437 | 0.02754586 down |
| MYH7         | -3.2012 | 0.00336222 | 0.0276767 down  |
| PART1        | -3.8345 | 0.00337348 | 0.02773783 down |
| PODXL        | 1.3475  | 0.00337447 | 0.02773783 up   |
| LOC105377663 | 1.6695  | 0.00338267 | 0.02779593 up   |
| BEND7        | -1.3814 | 0.00338418 | 0.02779906 down |
| IYD          | -4.7812 | 0.00338902 | 0.02782018 down |
| NLRC3        | -1.5641 | 0.00338859 | 0.02782018 down |
| ITM2C        | -1.4559 | 0.00340158 | 0.02788589 down |
| PPARGC1B     | -1.2584 | 0.0033996  | 0.02788589 down |
| CHAC1        | 3.0027  | 0.00340079 | 0.02788589 up   |
| FAM186A      | -1.4356 | 0.00340705 | 0.02792141 down |
| SLC22A23     | -1.2418 | 0.00341533 | 0.02797057 down |
| TMEM19       | -1.1906 | 0.00343166 | 0.02807618 down |
| FGR          | 2.1941  | 0.00343307 | 0.02807831 up   |
| CHRFAM7A     | -3.6347 | 0.0034409  | 0.02812359 down |
| DUSP5        | 1.7606  | 0.00344759 | 0.02814075 up   |
| GPR12        | -2.3301 | 0.00345357 | 0.02816871 down |
| EGR2         | 1.6022  | 0.00346347 | 0.02822345 up   |
| ELFN1        | 1.7880  | 0.00346625 | 0.02823665 up   |
| LINC00487    | -2.4993 | 0.00346812 | 0.02824255 down |
| LOC100128059 | 3.1988  | 0.00347173 | 0.02824433 up   |
| PTGR1        | -1.7939 | 0.00347178 | 0.02824433 down |
| STYK1        | -2.8579 | 0.00347908 | 0.02829424 down |
| ZNF214       | -1.2211 | 0.00348796 | 0.02834765 down |
| AVIL         | 1.0448  | 0.00349409 | 0.02838804 up   |
| TNNT1        | 2.8719  | 0.00351111 | 0.02850743 up   |
| MSRA         | -1.3300 | 0.00352012 | 0.02856169 down |
| SCP2         | -1.1313 | 0.00352447 | 0.02857819 down |
| FOXD1        | -2.4368 | 0.00352565 | 0.02857819 down |
| FCGBP        | -3.1496 | 0.00354652 | 0.0286925 down  |

|              |         |            |                 |
|--------------|---------|------------|-----------------|
| LRRC25       | 2.4214  | 0.00354908 | 0.0286925 up    |
| PSMD12P1     | 1.1912  | 0.00355756 | 0.02872285 up   |
| EXOSC4       | 1.0061  | 0.00356014 | 0.02873425 up   |
| DEPDC7       | -2.6106 | 0.00356852 | 0.02877346 down |
| STRIP2       | 2.9020  | 0.00358563 | 0.02889239 up   |
| LINC01529    | -1.7926 | 0.00359855 | 0.02896769 down |
| RPS26P23     | 3.2438  | 0.00360766 | 0.02899373 up   |
| SLC20A1      | 1.2030  | 0.00361883 | 0.02907393 up   |
| LINC01134    | -2.3818 | 0.00362852 | 0.02911528 down |
| SNORD51      | 3.0517  | 0.00362978 | 0.02911528 up   |
| XK           | -2.5455 | 0.00362728 | 0.02911528 down |
| CTNNA3       | -3.5380 | 0.00363089 | 0.02911528 down |
| PACRG        | -2.5945 | 0.00363514 | 0.02912865 down |
| MYO1A        | -4.3306 | 0.00363422 | 0.02912865 down |
| NAIP         | 1.8536  | 0.00365792 | 0.02929202 up   |
| RPL7P6       | 2.2978  | 0.0036834  | 0.02945946 up   |
| CCL18        | 2.7801  | 0.00369561 | 0.02951675 up   |
| FABP3        | 1.4732  | 0.00371434 | 0.02964699 up   |
| ANKRD29      | -1.3512 | 0.00373072 | 0.0297584 down  |
| LINC01798    | -1.8983 | 0.00374921 | 0.02988028 down |
| CDK17        | 1.0528  | 0.00375464 | 0.02991026 up   |
| PTP4A3       | 1.6997  | 0.00375783 | 0.02992591 up   |
| RPL36A       | 1.5649  | 0.00376509 | 0.02995462 up   |
| C13orf46     | 2.3536  | 0.00376428 | 0.02995462 up   |
| XCL2         | -2.1274 | 0.00377209 | 0.02997138 down |
| HSP90AB3P    | 1.2021  | 0.00377156 | 0.02997138 up   |
| HDAC9        | -1.1953 | 0.00377033 | 0.02997138 down |
| SECTM1       | -1.9243 | 0.00377123 | 0.02997138 down |
| FLJ22447     | 2.3174  | 0.00377586 | 0.02998189 up   |
| GCHFR        | -2.1656 | 0.00378755 | 0.03005523 down |
| ESPN         | -3.4325 | 0.00379482 | 0.03009343 down |
| SPOCD1       | 2.5929  | 0.00379707 | 0.03010158 up   |
| TDRD5        | -1.8094 | 0.00380884 | 0.03015587 down |
| PDXP         | -1.5497 | 0.00381777 | 0.03020705 down |
| BCO1         | -3.7142 | 0.0038269  | 0.03026958 down |
| FCGR1A       | 3.2912  | 0.00384035 | 0.03033183 up   |
| TSPOAP1-AS1  | -1.5205 | 0.00384096 | 0.03033183 down |
| LOC100996419 | -1.3213 | 0.00384909 | 0.03038624 down |
| NEURL1       | -2.3091 | 0.00385637 | 0.03043202 down |
| CSRNP3       | -1.5931 | 0.00386639 | 0.03045416 down |
| ANK3         | -1.7785 | 0.00386349 | 0.03045416 down |

|            |         |            |                 |
|------------|---------|------------|-----------------|
| ZNF460-AS1 | -1.2246 | 0.00386285 | 0.03045416 down |
| C19orf73   | -1.6173 | 0.00386557 | 0.03045416 down |
| NRGN       | 1.5988  | 0.00386857 | 0.03046156 up   |
| HOXC6      | -1.7623 | 0.00390337 | 0.03067647 down |
| ATP8A1     | -1.6956 | 0.00392349 | 0.03077796 down |
| IL3RA      | 1.1948  | 0.00392248 | 0.03077796 up   |
| CRYZ       | -1.0769 | 0.00394071 | 0.03084912 down |
| UGDH       | 1.1755  | 0.00394314 | 0.03085063 up   |
| EXOC3L2    | 1.6087  | 0.0039686  | 0.03103991 up   |
| IGHV4-61   | 3.4448  | 0.00397771 | 0.03110124 up   |
| TESC       | 1.8802  | 0.00398075 | 0.03111137 up   |
| DNAH3      | -1.6226 | 0.00398155 | 0.03111137 down |
| PON3       | -1.7939 | 0.00399955 | 0.03121224 down |
| CFAP161    | 2.2392  | 0.00400084 | 0.0312124 up    |
| LGALS9C    | -3.1231 | 0.00400812 | 0.03124934 down |
| ACTG1P14   | 1.3043  | 0.00401307 | 0.03126805 up   |
| MMP15      | -1.5431 | 0.00403045 | 0.03137357 down |
| LATS2      | 1.3691  | 0.00404138 | 0.03143869 up   |
| HOXB3      | -1.1691 | 0.00404434 | 0.03145169 down |
| AVPR1B     | -2.7805 | 0.00405072 | 0.03148134 down |
| DECR2      | -1.2326 | 0.00407574 | 0.03164398 down |
| EPS8L2     | -2.7551 | 0.00408203 | 0.03165697 down |
| CMPK2      | -1.5616 | 0.00408504 | 0.03166775 down |
| CCL13      | 3.0777  | 0.00409595 | 0.03170225 up   |
| UAP1       | 1.1632  | 0.00410366 | 0.03173183 up   |
| CTSB       | 2.3714  | 0.00410731 | 0.0317401 up    |
| TNFSF14    | 2.6153  | 0.00413459 | 0.03191069 up   |
| APOBEC2    | -2.2813 | 0.00413655 | 0.03191576 down |
| ATP1A2     | -2.5239 | 0.00414735 | 0.03196885 down |
| LINC00921  | -1.2681 | 0.00415167 | 0.03199216 down |
| MPND       | -1.0646 | 0.00416756 | 0.03207422 down |
| RANBP3L    | -2.2204 | 0.00416941 | 0.03207839 down |
| SPATC1     | 1.7521  | 0.00417715 | 0.03212481 up   |
| KLKB1      | -2.3339 | 0.00419955 | 0.03225942 down |
| MYO1B      | 1.3360  | 0.00421266 | 0.032324 up     |
| CASP6      | -1.3519 | 0.00421319 | 0.032324 down   |
| INSYN2B    | 2.5711  | 0.00421595 | 0.03233507 up   |
| BCO2       | -1.1930 | 0.00422313 | 0.03237997 down |
| DUSP14     | 1.8849  | 0.00423452 | 0.03243688 up   |
| FGFR3      | -2.9725 | 0.00423679 | 0.03244416 down |
| AMN        | -4.1436 | 0.00424629 | 0.03249659 down |

|              |         |            |                 |
|--------------|---------|------------|-----------------|
| CCR1         | 2.5163  | 0.00425387 | 0.03253428 up   |
| DICER1-AS1   | -1.1003 | 0.00426599 | 0.03261683 down |
| RPL15P18     | 1.4369  | 0.00427053 | 0.03264136 up   |
| GJA4         | 2.0352  | 0.00427351 | 0.03265391 up   |
| TUBAL3       | -4.2838 | 0.00427918 | 0.0326769 down  |
| FOS          | 1.1064  | 0.0042841  | 0.03270424 up   |
| IL17RE       | -2.1614 | 0.00429393 | 0.03273856 down |
| ACY1         | -2.1802 | 0.00429915 | 0.03275956 down |
| GPLD1        | -2.1329 | 0.00431878 | 0.03286708 down |
| ITIH2        | -1.5242 | 0.00431883 | 0.03286708 down |
| CTRB2        | 3.1733  | 0.00431737 | 0.03286708 up   |
| CCDC121      | -1.2002 | 0.0043296  | 0.03291839 down |
| SOX15        | -1.6187 | 0.00433146 | 0.03292229 down |
| LOC100506098 | -3.4618 | 0.00434191 | 0.03299151 down |
| RHCG         | 2.9122  | 0.00434585 | 0.03301123 up   |
| KLHL34       | -3.6544 | 0.00436351 | 0.03309413 down |
| MYO15B       | -1.7644 | 0.00436798 | 0.03310925 down |
| CEACAM3      | 2.4229  | 0.00437609 | 0.03313829 up   |
| GLULP4       | 1.7213  | 0.00437913 | 0.03315103 up   |
| GDPD1        | -1.4854 | 0.00438906 | 0.03321594 down |
| NPC1         | 1.0409  | 0.00440087 | 0.033254 up     |
| CAP2         | -2.2527 | 0.00440535 | 0.03327761 down |
| LINC00933    | -2.2394 | 0.00442054 | 0.03337179 down |
| B3GALT2      | -2.2207 | 0.00442526 | 0.03338688 down |
| LINC01198    | 2.2268  | 0.0044305  | 0.03339557 up   |
| CTSG         | -2.1647 | 0.00442893 | 0.03339557 down |
| ATE1-AS1     | -2.1522 | 0.00445249 | 0.03354069 down |
| THSD4        | -2.0061 | 0.00446626 | 0.03359716 down |
| LOC105373100 | 2.1493  | 0.00447074 | 0.03360593 up   |
| LOC101927124 | -1.4775 | 0.00448138 | 0.03367396 down |
| HPN-AS1      | 2.5044  | 0.00448254 | 0.03367396 up   |
| PHOSPHO2     | -1.0908 | 0.00448499 | 0.03368122 down |
| MIR4257      | 1.7117  | 0.00449068 | 0.03370415 up   |
| RPL13AP20    | 1.4752  | 0.00449568 | 0.03372103 up   |
| TUBB2A       | 1.0585  | 0.00450503 | 0.03377049 up   |
| CEP170P1     | 1.1051  | 0.00451938 | 0.03383673 up   |
| PLD1         | -1.3860 | 0.00451868 | 0.03383673 down |
| ZNF483       | -1.6428 | 0.00451923 | 0.03383673 down |
| TMPRSS15     | -4.3347 | 0.00452811 | 0.0338917 down  |
| NDUFA4L2     | 2.0204  | 0.00453607 | 0.03394094 up   |
| LOC100132857 | 1.5065  | 0.00457242 | 0.03417121 up   |

|              |         |            |                 |
|--------------|---------|------------|-----------------|
| BRINP3       | -3.4493 | 0.00458729 | 0.03426145 down |
| CEACAM22P    | -2.5113 | 0.0045869  | 0.03426145 down |
| MOGAT2       | -4.4173 | 0.00459692 | 0.03430202 down |
| RPS16P1      | 1.2545  | 0.00460345 | 0.03434034 up   |
| LINC00942    | 3.0115  | 0.00463398 | 0.03450506 up   |
| KLRC1        | -2.0284 | 0.00464736 | 0.0345732 down  |
| SLC35G1      | -1.8183 | 0.00465372 | 0.03457858 down |
| STRCP1       | -2.3841 | 0.00465768 | 0.0345975 down  |
| CATIP        | 2.2946  | 0.00467248 | 0.03468641 up   |
| RNU6-415P    | 2.2137  | 0.00470084 | 0.03486527 up   |
| WDR54        | 1.2046  | 0.00472282 | 0.03500149 up   |
| FLJ12825     | -2.6539 | 0.00472349 | 0.03500149 down |
| FADS6        | -4.5708 | 0.00472717 | 0.03501816 down |
| MCRIP2       | -1.2759 | 0.0047329  | 0.03504425 down |
| HLA-DRB6     | -1.4338 | 0.00473811 | 0.03506746 down |
| ACAA1        | -1.2264 | 0.00476531 | 0.03521558 down |
| FLJ46284     | -1.4015 | 0.00476929 | 0.0352344 down  |
| LINC01133    | -2.8845 | 0.00480015 | 0.03537012 down |
| ST6GAL2      | -2.5567 | 0.0047942  | 0.03537012 down |
| SLC3A2       | 1.1003  | 0.00480064 | 0.03537012 up   |
| SPHK2        | -1.0854 | 0.00479582 | 0.03537012 down |
| CSNK1E       | 1.1939  | 0.00479786 | 0.03537012 up   |
| EVA1C        | 1.2386  | 0.0047971  | 0.03537012 up   |
| CATSPER2     | -1.3106 | 0.00482362 | 0.03548606 down |
| LOC105373334 | -1.7047 | 0.00484026 | 0.03555514 down |
| TMEM120A     | -1.3590 | 0.00484234 | 0.03555982 down |
| FAM219A      | 1.0310  | 0.00484818 | 0.03557069 up   |
| STX19        | -2.9257 | 0.00485483 | 0.03560884 down |
| MFSD3        | -1.0541 | 0.00487553 | 0.03569608 down |
| BMS1P1       | -1.5333 | 0.00487691 | 0.03569608 down |
| LINC00857    | -1.2175 | 0.00487907 | 0.03570122 down |
| PGAP3        | -1.1870 | 0.00488372 | 0.03572456 down |
| BACE2        | 1.4290  | 0.00488529 | 0.03572539 up   |
| TAS2R4       | -1.4603 | 0.00489994 | 0.03578984 down |
| SOCS2        | 1.1925  | 0.00489869 | 0.03578984 up   |
| SI           | -5.1595 | 0.00490788 | 0.03583718 down |
| VMP1         | 1.2157  | 0.00491532 | 0.0358808 up    |
| CD63         | 1.0998  | 0.00491833 | 0.03589208 up   |
| STOX1        | -1.5741 | 0.00493324 | 0.03595812 down |
| FAM166B      | -1.3456 | 0.00494234 | 0.03601374 down |
| PYCR1        | 1.7049  | 0.00494733 | 0.03603939 up   |

|              |         |            |                 |
|--------------|---------|------------|-----------------|
| MFSD4B       | -1.2570 | 0.00494882 | 0.03603949 down |
| TLR8         | 2.5174  | 0.00495231 | 0.03605421 up   |
| GCATP1       | 1.7817  | 0.00495658 | 0.0360746 up    |
| ZNF273       | -1.4935 | 0.00496743 | 0.03614282 down |
| LOC100507516 | -2.0949 | 0.00497271 | 0.03614544 down |
| LINC01224    | -4.0473 | 0.0049703  | 0.03614544 down |
| ASB2         | -2.6995 | 0.00498809 | 0.03621792 down |
| LYPD3        | 1.5854  | 0.00499179 | 0.03622336 up   |
| MEX3A        | 1.2184  | 0.00499348 | 0.03622486 up   |
| ZNF223       | -1.1802 | 0.00500507 | 0.0362769 down  |
| LINC01686    | 2.7582  | 0.00501509 | 0.03633276 up   |
| ADCY3        | 1.3656  | 0.00501576 | 0.03633276 up   |
| CCL28        | -2.3105 | 0.00503813 | 0.03646238 down |
| CES1         | -2.3113 | 0.0050396  | 0.03646238 down |
| NEIL1        | -1.1760 | 0.00504351 | 0.03647988 down |
| RPF2P1       | 1.4768  | 0.00505208 | 0.03653113 up   |
| PPFIA2       | 1.5898  | 0.00505723 | 0.03655756 up   |
| HCP5B        | -2.6898 | 0.00508381 | 0.03669546 down |
| RGCC         | 2.1947  | 0.00508655 | 0.03669546 up   |
| LOC105378819 | 1.5587  | 0.00511124 | 0.03683942 up   |
| RPS3AP6      | 1.4687  | 0.00511107 | 0.03683942 up   |
| HINT2        | -1.0215 | 0.00516355 | 0.03715092 down |
| FUT7         | 1.7857  | 0.00516304 | 0.03715092 up   |
| BAIAP2L2     | -2.8855 | 0.00517088 | 0.03719275 down |
| HLA-DPA1     | -1.5800 | 0.00517672 | 0.03722382 down |
| PRTFDC1      | -1.3033 | 0.00518216 | 0.03725203 down |
| RPSAP15      | 3.1231  | 0.00519031 | 0.03728871 up   |
| HELB         | 1.1048  | 0.0052118  | 0.03743217 up   |
| DAZL         | 2.9071  | 0.00522211 | 0.03746427 up   |
| MKRN2OS      | -2.2433 | 0.00522151 | 0.03746427 down |
| METTL7B      | -3.1410 | 0.00522057 | 0.03746427 down |
| CAPN3        | -1.3630 | 0.00524291 | 0.03757851 down |
| TMSB15A      | 2.2166  | 0.00525217 | 0.03762289 up   |
| ADGRB2       | -1.2202 | 0.00525649 | 0.03764284 down |
| NUDT16L2P    | -1.9922 | 0.00526087 | 0.03766324 down |
| CFAP157      | 1.0085  | 0.005267   | 0.03769613 up   |
| ABAT         | -1.4303 | 0.00530651 | 0.03793455 down |
| RPL21P1      | 1.4224  | 0.0053135  | 0.03796242 up   |
| ECM1         | 1.3416  | 0.0053285  | 0.03804585 up   |
| LOC105375624 | -1.0836 | 0.00533667 | 0.03806801 down |
| LOC100419831 | -1.0408 | 0.00534205 | 0.03808868 down |



|           |         |            |                 |
|-----------|---------|------------|-----------------|
| STEAP2    | 1.0917  | 0.00534388 | 0.03809069 up   |
| AKR7L     | -3.3270 | 0.00535281 | 0.03813213 down |
| USH2A     | -1.6890 | 0.00536621 | 0.03821652 down |
| CD14      | 2.5073  | 0.00537056 | 0.03823637 up   |
| ZNF385C   | -1.4236 | 0.00537497 | 0.03824694 down |
| RORC      | -3.0901 | 0.00539538 | 0.03836711 down |
| SLC3A1    | -2.5995 | 0.00541017 | 0.03844024 down |
| PP2D1     | 1.4933  | 0.00542123 | 0.03849657 up   |
| CCL23     | 2.6429  | 0.00542959 | 0.03853358 up   |
| EVA1A     | 1.6836  | 0.00544599 | 0.03859411 up   |
| DOLPP1    | -1.6311 | 0.00544515 | 0.03859411 down |
| FAP       | 2.2116  | 0.00545853 | 0.03866062 up   |
| IMPG1     | -1.8854 | 0.00552114 | 0.03900269 down |
| ULBP3     | 1.4879  | 0.00552908 | 0.03903626 up   |
| DYRK2     | -1.3254 | 0.00552859 | 0.03903626 down |
| HSP90AB1  | 1.1551  | 0.00554502 | 0.03911502 up   |
| LINC01238 | -1.9968 | 0.00555565 | 0.03916751 down |
| LINC01554 | 1.9282  | 0.00556123 | 0.03919557 up   |
| ASTE1     | -1.0820 | 0.00557176 | 0.03923423 down |
| KIF17     | 1.2303  | 0.00558678 | 0.03930788 up   |
| ARL5B     | 1.0546  | 0.00559393 | 0.03933556 up   |
| ZDHHC23   | -1.7429 | 0.00559896 | 0.03935969 down |
| GPR137B   | 1.5211  | 0.00561074 | 0.03939737 up   |
| SMAP2     | 1.0778  | 0.0056067  | 0.03939737 up   |
| HLA-DPB1  | -1.4356 | 0.00561075 | 0.03939737 down |
| TMEM184A  | -3.4075 | 0.00564353 | 0.03954825 down |
| PXMP2     | -1.9563 | 0.0056431  | 0.03954825 down |
| TMEM72    | -3.2658 | 0.00564724 | 0.03955705 down |
| PYGM      | -1.9212 | 0.00567376 | 0.03964851 down |
| SCNN1A    | -3.2385 | 0.0056715  | 0.03964851 down |
| PREX1     | 1.4298  | 0.00570344 | 0.03982012 up   |
| CLEC2L    | -2.0246 | 0.00570908 | 0.03983683 down |
| ABCA1     | 1.4983  | 0.00570778 | 0.03983683 up   |
| H3C6      | -1.9704 | 0.00572783 | 0.0399449 down  |
| PDLIM2    | -1.1705 | 0.00575041 | 0.04009104 down |
| POLR1F    | 1.1438  | 0.00576092 | 0.04015286 up   |
| COBL      | -2.4114 | 0.00576585 | 0.04017582 down |
| COL3A1    | 2.6927  | 0.00578281 | 0.04025967 up   |
| SULT1B1   | -3.0270 | 0.00578702 | 0.04027754 down |
| EEF1B2P6  | 1.3422  | 0.0058134  | 0.0404267 up    |
| RERGL     | -1.5891 | 0.00586624 | 0.04070179 down |

|              |         |            |                 |
|--------------|---------|------------|-----------------|
| LINC02432    | 2.8039  | 0.00587356 | 0.04071802 up   |
| MPP7         | -1.6540 | 0.0058728  | 0.04071802 down |
| ASIC1        | -1.7557 | 0.00587334 | 0.04071802 down |
| TMEM178A     | -1.5542 | 0.00589881 | 0.0408469 down  |
| PPFIBP2      | -1.4053 | 0.00590475 | 0.04087644 down |
| CDH15        | 2.2486  | 0.00591533 | 0.04092144 up   |
| EVPL         | -2.6980 | 0.00592172 | 0.04094773 down |
| ETV5         | 1.5830  | 0.00593387 | 0.04098548 up   |
| PAFAH2       | -1.3266 | 0.00594794 | 0.04103355 down |
| BTNL2        | -3.4873 | 0.00594635 | 0.04103355 down |
| MIR25        | -1.5993 | 0.00594459 | 0.04103355 down |
| LINC00484    | -1.9542 | 0.00595149 | 0.04103355 down |
| OIT3         | -3.5777 | 0.00594886 | 0.04103355 down |
| ACSL5        | -2.4323 | 0.00595215 | 0.04103355 down |
| ETV2         | -1.3237 | 0.00595628 | 0.04103627 down |
| CYP3A5       | -3.3527 | 0.00597178 | 0.04113145 down |
| SEPTIN6      | -1.0108 | 0.00598318 | 0.0411984 down  |
| CHRM2        | -3.8637 | 0.00599554 | 0.04126038 down |
| OR2B11       | 3.4808  | 0.00600064 | 0.04127231 up   |
| MYBPH        | 3.0372  | 0.00600856 | 0.04130359 up   |
| KCNK7        | 1.7873  | 0.00604316 | 0.04145225 up   |
| FES          | 1.2835  | 0.00604187 | 0.04145225 up   |
| SIGLEC16     | 2.2721  | 0.00604371 | 0.04145225 up   |
| LOC105370969 | -2.0775 | 0.00608109 | 0.04165035 down |
| BMF          | -1.4830 | 0.00608777 | 0.04167282 down |
| PRR16        | 1.5864  | 0.0061199  | 0.0418177 up    |
| PTPN12       | 1.0008  | 0.00613828 | 0.04192496 up   |
| RNASE4       | -1.6751 | 0.0061455  | 0.04196256 down |
| LRP5         | -1.0419 | 0.00615116 | 0.04197789 down |
| LOC257396    | -1.2265 | 0.00616603 | 0.04202084 down |
| RAP1GAP      | -2.6597 | 0.00618135 | 0.04210186 down |
| C19orf38     | 1.7176  | 0.00619242 | 0.04215387 up   |
| ATP6V0D2     | -3.1364 | 0.00620399 | 0.04219749 down |
| ZBTB7B       | -1.5645 | 0.00621665 | 0.04223518 down |
| FOXC1        | 1.6935  | 0.00621815 | 0.04223518 up   |
| ETS1         | 1.3114  | 0.00621354 | 0.04223518 up   |
| BCYRN1       | 1.8959  | 0.00623194 | 0.04230539 up   |
| LINC00649    | -1.4021 | 0.00623566 | 0.04231893 down |
| PGAP2        | -1.0886 | 0.00623979 | 0.04233529 down |
| RNF224       | -2.6881 | 0.00624606 | 0.04236612 down |
| SLC39A8      | 2.4307  | 0.00624843 | 0.04237046 up   |

|              |         |            |                 |
|--------------|---------|------------|-----------------|
| SRPK3        | -1.6540 | 0.00625427 | 0.04239828 down |
| NGF          | 1.9412  | 0.00625825 | 0.04241356 up   |
| C9orf40      | -1.1738 | 0.0062916  | 0.04260427 down |
| LOC100505501 | -1.7968 | 0.00629482 | 0.04261432 down |
| ENPP7        | -4.5425 | 0.00630187 | 0.04262674 down |
| CEACAM4      | 2.1381  | 0.00630676 | 0.04263629 up   |
| SLC35D1      | -1.2202 | 0.00632561 | 0.04274014 down |
| RCC1         | 1.0455  | 0.00633001 | 0.04274634 up   |
| RGL3         | 1.6503  | 0.00632927 | 0.04274634 up   |
| PGR          | -2.1972 | 0.0063389  | 0.04279453 down |
| LBX2-AS1     | -1.5240 | 0.00634078 | 0.04279544 down |
| ACADS        | -1.5528 | 0.0064177  | 0.04327888 down |
| COL4A1       | 1.9209  | 0.00642819 | 0.04331392 up   |
| TBXAS1       | 1.6238  | 0.00643047 | 0.04331733 up   |
| LMNA         | 1.5746  | 0.00643478 | 0.04332356 up   |
| CHST11       | 1.1385  | 0.00643981 | 0.04333265 up   |
| STAP2        | -2.7858 | 0.00646535 | 0.04345676 down |
| FAM151B      | 1.2644  | 0.00646937 | 0.04346573 up   |
| CMYA5        | -1.4645 | 0.00647023 | 0.04346573 down |
| RPL7P18      | 1.9690  | 0.00647649 | 0.04349587 up   |
| ASB9         | 1.0743  | 0.00650606 | 0.0436586 up    |
| C1orf162     | 2.1419  | 0.00651935 | 0.04372388 up   |
| CBX7         | -1.3158 | 0.00655033 | 0.04390761 down |
| LACTB2-AS1   | -1.8910 | 0.00655374 | 0.04391851 down |
| HDAC4-AS1    | -1.3173 | 0.00658265 | 0.04409873 down |
| HOXB5        | -1.6428 | 0.00658613 | 0.04409938 down |
| EEF1GP5      | 1.3858  | 0.00663242 | 0.04434874 up   |
| FAM43B       | 2.0420  | 0.00665348 | 0.04445322 up   |
| MFSD9        | -1.1326 | 0.00665952 | 0.04448143 down |
| ANKRD33      | 3.0230  | 0.00666364 | 0.04449688 up   |
| BBS12        | -1.0505 | 0.00667059 | 0.04450888 down |
| SNORD14A     | 1.6090  | 0.00667129 | 0.04450888 up   |
| TRDV1        | -3.9520 | 0.00666901 | 0.04450888 down |
| KIAA0040     | 1.2893  | 0.00669124 | 0.04460825 up   |
| DCLK3        | 1.4732  | 0.00670456 | 0.0446728 up    |
| RPS2P20      | 1.3258  | 0.0067141  | 0.0447242 up    |
| CDC14A       | -1.2935 | 0.00671921 | 0.04474606 down |
| AKR1B10      | -3.6088 | 0.00673462 | 0.04481216 down |
| DNAJB4       | 1.7553  | 0.00674606 | 0.04486812 up   |
| CACNB2       | -1.8527 | 0.00677196 | 0.04497518 down |
| CASZ1        | -1.6474 | 0.00677914 | 0.04501067 down |

|            |         |            |                 |
|------------|---------|------------|-----------------|
| SORBS2     | -1.8573 | 0.00678172 | 0.04501562 down |
| PANX2      | 2.0781  | 0.00678648 | 0.04501619 up   |
| FAAH       | -1.7965 | 0.00683498 | 0.04519532 down |
| DENND1B    | -1.6723 | 0.00682823 | 0.04519532 down |
| LCORL      | -1.1984 | 0.00683151 | 0.04519532 down |
| F13A1      | 2.9795  | 0.00683384 | 0.04519532 up   |
| DPEP1      | -4.9287 | 0.00684331 | 0.04519532 down |
| PRO1804    | -2.6223 | 0.00683852 | 0.04519532 down |
| C1QL3      | -1.4331 | 0.00684797 | 0.0452106 down  |
| LGR4       | -1.2939 | 0.00687551 | 0.04534357 down |
| DUBR       | -1.3212 | 0.00688719 | 0.04540842 down |
| GPR15      | -3.6020 | 0.00689689 | 0.04546017 down |
| AKR1B15    | -2.8407 | 0.00691327 | 0.04553137 down |
| LINC02313  | -3.4999 | 0.00691609 | 0.04553776 down |
| LINC00426  | -2.0813 | 0.00692009 | 0.04555187 down |
| TAPT1-AS1  | -1.0776 | 0.00697744 | 0.0458894 down  |
| UGT2A3     | -4.5864 | 0.00698334 | 0.04590658 down |
| C3orf18    | -1.3505 | 0.00699143 | 0.04593792 down |
| CYTL1      | 1.7162  | 0.00701218 | 0.04604557 up   |
| PDE9A      | -2.1477 | 0.00704185 | 0.04616742 down |
| CKMT1B     | -2.7600 | 0.00706477 | 0.04629297 down |
| TMIGD2     | -2.5455 | 0.0070753  | 0.04634956 down |
| HTRA3      | 1.7379  | 0.00710714 | 0.04644648 up   |
| LINC00339  | -1.0515 | 0.00712083 | 0.04651114 down |
| HEBP1      | -1.2007 | 0.00713156 | 0.04655637 down |
| FREM1      | -1.9327 | 0.00714236 | 0.04657731 down |
| IL20RA     | -1.3879 | 0.00714674 | 0.0465935 down  |
| SLC4A4     | -1.8040 | 0.00715233 | 0.04661752 down |
| RHEX       | -1.8598 | 0.0071782  | 0.04672405 down |
| NAGS       | -2.4389 | 0.00717737 | 0.04672405 down |
| BTD        | -1.2630 | 0.00718452 | 0.04672797 down |
| LHFPL3-AS2 | -3.4843 | 0.00718349 | 0.04672797 down |
| MT2A       | 1.6421  | 0.00718254 | 0.04672797 up   |
| CLDN1      | 1.9561  | 0.00719345 | 0.04676121 up   |
| STAB2      | -1.9482 | 0.00721177 | 0.0468431 down  |
| RNF150     | -1.6933 | 0.00722255 | 0.04688828 down |
| LRG1       | 2.0547  | 0.00722691 | 0.04690411 up   |
| GALNT12    | -1.6388 | 0.00723477 | 0.04691953 down |
| C2CD4A     | 3.3633  | 0.00723159 | 0.04691953 up   |
| SELL       | 1.9534  | 0.00727058 | 0.04710033 up   |
| KIAA2013   | -1.1225 | 0.00727711 | 0.0471177 down  |

|              |         |            |                 |
|--------------|---------|------------|-----------------|
| LOC100420899 | 2.0348  | 0.00729661 | 0.04723146 up   |
| RPL21P72     | 2.1474  | 0.00733233 | 0.04741148 up   |
| EML6         | -2.4935 | 0.00733792 | 0.047413 down   |
| PCDH17       | 1.5019  | 0.00737218 | 0.04758249 up   |
| PLAAT4       | -1.6059 | 0.00742384 | 0.04781414 down |
| PCAT19       | 1.5305  | 0.00742871 | 0.04781414 up   |
| SIGLEC7      | 2.4222  | 0.00742668 | 0.04781414 up   |
| VPREB3       | -3.6464 | 0.00742395 | 0.04781414 down |
| LOC442517    | 2.4642  | 0.00743855 | 0.04785965 up   |
| MPL          | -1.2321 | 0.00744295 | 0.04787542 down |
| LOC340090    | -2.7843 | 0.00746589 | 0.04799782 down |
| PLEK         | 1.6871  | 0.00747766 | 0.04806087 up   |
| KCNN3        | -1.9004 | 0.00749718 | 0.04813554 down |
| CCL4L1       | 1.5072  | 0.0074955  | 0.04813554 up   |
| SGK2         | -2.1047 | 0.00749745 | 0.04813554 down |
| RPL23P7      | 1.3534  | 0.00751176 | 0.04820425 up   |
| SNORD69      | 1.2153  | 0.00754031 | 0.04833683 up   |
| LOC613206    | -2.0660 | 0.0075429  | 0.0483408 down  |
| CTNND1       | -1.0410 | 0.00754993 | 0.04837291 down |
| CA14         | -2.6357 | 0.00756772 | 0.0484619 down  |
| KLF2         | 1.4660  | 0.00760616 | 0.04869528 up   |
| LRRC70       | 1.4950  | 0.00766949 | 0.0489984 up    |
| MIGA2        | -1.1311 | 0.00767312 | 0.04900884 down |
| GALNT8       | -1.5373 | 0.00770169 | 0.04914844 down |
| ANKS4B       | -3.8266 | 0.007703   | 0.04914844 down |
| OSTN-AS1     | -3.6200 | 0.00772146 | 0.04924303 down |
| EPB41L4B     | -2.3116 | 0.00772318 | 0.04924303 down |
| DMD          | -1.4196 | 0.00772852 | 0.04926001 down |
| NCF2         | 1.8439  | 0.00778218 | 0.04957626 up   |
| RPS3AP19     | -2.7070 | 0.00779432 | 0.0496407 down  |
| METTL24      | -1.8789 | 0.00780401 | 0.0496761 down  |
| DGKB         | -2.9450 | 0.0078057  | 0.0496761 down  |
| S100B        | -2.1286 | 0.00782578 | 0.04975062 down |
| PLEKHA7      | -1.6829 | 0.00782945 | 0.04975304 down |
| ERVFRD-1     | -2.0260 | 0.007858   | 0.04986649 down |
| IMPDH1       | 1.4267  | 0.00786028 | 0.04986649 up   |
| ADAMTS7P4    | -1.5916 | 0.00788209 | 0.04996607 down |

---

**Table S5 45 FRGs in human after intestinal ischemia/reperfusion**

| Genes    | log2FoldChange | pvalue     | padj       | regulated |
|----------|----------------|------------|------------|-----------|
| Acsf2    | -2.0176516     | 0.00201648 | 0.01931408 | down      |
| Nox1     | -2.7827104     | 0.00036208 | 0.00549836 | down      |
| Scp2     | -1.1313064     | 0.00352447 | 0.02857819 | down      |
| Acsl4    | 2.30924202     | 8.61E-12   | 2.99E-09   | up        |
| Tfrc     | 1.28638114     | 0.00302017 | 0.02563927 | up        |
| Hmox1    | 3.01077673     | 4.74E-09   | 6.75E-07   | up        |
| Wipi1    | 1.6531891      | 0.00010386 | 0.00209078 | up        |
| Sat1     | 1.25844082     | 0.00259336 | 0.02305123 | up        |
| Bid      | 1.1124967      | 3.37E-05   | 0.0008922  | up        |
| Dpp4     | -3.2096671     | 0.00072291 | 0.00905475 | down      |
| Chac1    | 3.00274634     | 0.00340079 | 0.02788589 | up        |
| Hilpda   | 2.0093699      | 0.00021189 | 0.00366406 | up        |
| Hif1a    | 2.52630806     | 1.80E-20   | 4.01E-17   | up        |
| Tnfaip3  | 2.90434654     | 5.98E-10   | 1.17E-07   | up        |
| Atf3     | 2.13140328     | 5.03E-08   | 4.55E-06   | up        |
| Panx1    | 1.96895057     | 1.89E-15   | 1.55E-12   | up        |
| Dusp1    | 1.74622131     | 9.44E-06   | 0.00033175 | up        |
| Ncf2     | 1.84390702     | 0.00778218 | 0.04957626 | up        |
| Alb      | -1.6420041     | 0.00298219 | 0.02545193 | down      |
| Srxn1    | 1.66493872     | 7.44E-05   | 0.0016149  | up        |
| Angptl7  | -2.6912218     | 0.00160716 | 0.01644728 | down      |
| Slc7a11  | 4.18321519     | 0.00071813 | 0.00902082 | up        |
| Pck2     | -3.1547425     | 7.48E-05   | 0.00162097 | down      |
| Slc7a5   | 3.5058468      | 3.99E-07   | 2.47E-05   | up        |
| Slc3a2   | 1.10033076     | 0.00480064 | 0.03537012 | up        |
| Trib3    | 3.33739598     | 3.79E-05   | 0.00096522 | up        |
| Vegfa    | 1.51542615     | 0.00083869 | 0.0100753  | up        |
| Gdf15    | 2.41009407     | 0.00215121 | 0.02026417 | up        |
| Arrdc3   | 1.29165882     | 0.00076703 | 0.00944157 | up        |
| Il6      | 5.70080342     | 1.12E-11   | 3.77E-09   | up        |
| Cxcl2    | 3.87008077     | 1.47E-09   | 2.61E-07   | up        |
| Hsd17b11 | -1.7877427     | 0.00235446 | 0.02147074 | down      |
| Map3k5   | 1.11462892     | 8.94E-16   | 8.43E-13   | up        |
| Slc2a1   | 2.53999817     | 0.00057342 | 0.00769158 | up        |
| Slc2a3   | 3.27070965     | 3.51E-13   | 1.72E-10   | up        |
| Slc2a6   | 1.81633074     | 0.00052391 | 0.00720084 | up        |
| Slc2a12  | -2.3605809     | 0.00211498 | 0.01999971 | down      |
| Slc2a14  | 2.28470666     | 0.00327388 | 0.02714766 | up        |

|        |            |            |               |
|--------|------------|------------|---------------|
| Nnmt   | 3.40516886 | 1.22E-07   | 9.48E-06 up   |
| Gabpb1 | 1.28786866 | 1.20E-05   | 0.00039537 up |
| Hspa5  | 1.96879059 | 1.14E-08   | 1.36E-06 up   |
| Cd44   | 1.71907931 | 1.19E-07   | 9.29E-06 up   |
| Plin2  | 1.60300513 | 0.00274184 | 0.0240021 up  |
| Zfp36  | 1.46958971 | 0.00043138 | 0.00623296 up |
| Sqle   | 1.38945017 | 0.00325723 | 0.02703696 up |

**Table S6 200 FRGs in human after intestinal ischemia/reperfusion**

| Genes    | log2FoldChange | pvalue     | padj       | regulated |
|----------|----------------|------------|------------|-----------|
| Calr     | 1.06820021     | 0.00333933 | 0.0275228  | up        |
| Cd1c     | -3.2416877     | 0.00026121 | 0.00430071 | down      |
| Cd1e     | -3.1400321     | 0.0021891  | 0.02048728 | down      |
| Cd8b     | -2.236737      | 0.00199808 | 0.01922803 | down      |
| Cd74     | -1.5610183     | 0.00270669 | 0.02378619 | down      |
| Ctsb     | 2.3714353      | 0.00410731 | 0.0317401  | up        |
| Ctsl     | 2.50886073     | 5.05E-05   | 0.00120033 | up        |
| Fcer1g   | 2.36932999     | 0.00211141 | 0.01998911 | up        |
| Hla-Dmb  | -2.1631002     | 0.0005985  | 0.00794547 | down      |
| Hla-Dpa1 | -1.5800265     | 0.00517672 | 0.03722382 | down      |
| Hla-Dpb1 | -1.4355878     | 0.00561075 | 0.03939737 | down      |
| Hla-Dra  | -1.7072297     | 0.00212974 | 0.02009285 | down      |
| Hspa5    | 1.96879059     | 1.14E-08   | 1.36E-06   | up        |
| Hspa6    | 6.60212484     | 2.13E-09   | 3.46E-07   | up        |
| Orm1     | 3.88641119     | 0.00029223 | 0.00467419 | up        |
| Ctsg     | -2.1646855     | 0.00442893 | 0.03339557 | down      |
| Aen      | 1.2865195      | 1.63E-05   | 0.00050707 | up        |
| Tlr3     | -1.4924951     | 0.00021731 | 0.00373657 | down      |
| Tfrc     | 1.28638114     | 0.00302017 | 0.02563927 | up        |
| Gdf15    | 2.41009407     | 0.00215121 | 0.02026417 | up        |
| Socs3    | 3.21656761     | 8.21E-07   | 4.49E-05   | up        |
| Tnfsf10  | -1.8791618     | 1.09E-05   | 0.0003677  | down      |
| Plaat4   | -1.6058979     | 0.00742384 | 0.04781414 | down      |
| Vegfa    | 1.51542615     | 0.00083869 | 0.0100753  | up        |
| Tnfaip3  | 2.90434654     | 5.98E-10   | 1.17E-07   | up        |
| Il27     | 3.7537736      | 9.89E-05   | 0.00200933 | up        |

|           |            |            |                 |
|-----------|------------|------------|-----------------|
| Klkb1     | -2.3338728 | 0.00419955 | 0.03225942 down |
| Tlr8      | 2.51744614 | 0.00495231 | 0.03605421 up   |
| Apom      | -2.4445853 | 0.00013489 | 0.00257397 down |
| Nod1      | 1.41970595 | 1.04E-05   | 0.00035826 up   |
| Bphl      | -1.7967506 | 0.00039781 | 0.00587613 down |
| Tkfc      | -2.5862038 | 0.00053995 | 0.00734954 down |
| Nfkbiz    | 2.40351823 | 6.18E-12   | 2.26E-09 up     |
| Mpo       | 2.43123526 | 0.00143727 | 0.0151123 up    |
| Slc11a1   | 4.63014349 | 4.73E-07   | 2.84E-05 up     |
| Sting1    | 1.20026876 | 0.00154542 | 0.0160256 up    |
| Tnfrsf10a | 1.37088511 | 0.00107546 | 0.01213537 up   |
| Ccl4      | 2.55806409 | 1.13E-05   | 0.00037543 up   |
| Marco     | 4.85194532 | 5.91E-05   | 0.0013559 up    |
| Ccl28     | -2.3105458 | 0.00503813 | 0.03646238 down |
| Il1a      | 5.38842117 | 0.00023474 | 0.00397775 up   |
| Ptx3      | 6.03051239 | 2.53E-16   | 2.82E-13 up     |
| Ifnar2    | 1.01725104 | 0.00063128 | 0.00825103 up   |
| Cd14      | 2.50726246 | 0.00537056 | 0.03823637 up   |
| Masp1     | -3.0629047 | 0.00078255 | 0.00955501 down |
| Proc      | -2.761756  | 0.00172179 | 0.01721091 down |
| Irf9      | -1.114809  | 7.79E-05   | 0.00167586 down |
| Hmox1     | 3.01077673 | 4.74E-09   | 6.75E-07 up     |
| Hgf       | 1.65644268 | 0.00138198 | 0.01467571 up   |
| Stab2     | -1.9482246 | 0.00721177 | 0.0468431 down  |
| Alb       | -1.6420041 | 0.00298219 | 0.02545193 down |
| Serpina3  | 2.72405066 | 0.00289536 | 0.02488406 up   |
| Ccl14     | -2.7453167 | 1.52E-05   | 0.00047872 down |
| Ccl13     | 3.07773376 | 0.00409595 | 0.03170225 up   |
| Ccl18     | 2.78006284 | 0.00369561 | 0.02951675 up   |
| Ccl26     | 2.53736487 | 0.00031267 | 0.00491762 up   |
| Ccl4l1    | 1.50720923 | 0.0074955  | 0.04813554 up   |
| Ackr4     | -2.2022466 | 2.47E-06   | 0.00011151 down |
| Ccl2      | 4.61460708 | 1.03E-10   | 2.75E-08 up     |
| Ccl3      | 3.27127092 | 8.83E-08   | 7.24E-06 up     |
| Ccl23     | 2.64285191 | 0.00542959 | 0.03853358 up   |
| Ccl3l3    | 3.18891818 | 0.00024064 | 0.0040497 up    |
| Ccl8      | 2.18734281 | 0.00045035 | 0.00646002 up   |
| Ccr1      | 2.51632464 | 0.00425387 | 0.03253428 up   |
| Xcl2      | -2.1274197 | 0.00377209 | 0.02997138 down |
| Cxcl1     | 5.19501555 | 5.62E-08   | 4.94E-06 up     |
| Cxcl2     | 3.87008077 | 1.47E-09   | 2.61E-07 up     |



|          |            |            |                 |
|----------|------------|------------|-----------------|
| Il6      | 5.70080342 | 1.12E-11   | 3.77E-09 up     |
| Il1b     | 5.20891648 | 5.10E-11   | 1.42E-08 up     |
| Il10     | 3.26097635 | 0.00049139 | 0.00686942 up   |
| Fgr      | 2.19413376 | 0.00343307 | 0.02807831 up   |
| Ptgdr    | -1.8650323 | 0.00019884 | 0.00347505 down |
| Hck      | 2.56103574 | 0.00010951 | 0.00218142 up   |
| Olr1     | 2.45159977 | 3.01E-05   | 0.0008209 up    |
| Rnase2   | 5.42032668 | 4.25E-07   | 2.60E-05 up     |
| Ighv4-61 | 3.4447533  | 0.00397771 | 0.03110124 up   |
| Cma1     | -3.0484701 | 0.00328019 | 0.02718155 down |
| Cxcl3    | 5.31434741 | 1.02E-16   | 1.25E-13 up     |
| Cxcl5    | 6.08132413 | 4.04E-05   | 0.00101505 up   |
| Ccn1     | 3.25770024 | 2.23E-08   | 2.34E-06 up     |
| Edn3     | -3.5902304 | 0.00300803 | 0.02557453 down |
| Cxcl8    | 7.88200103 | 1.50E-19   | 2.63E-16 up     |
| Pf4      | 3.17826989 | 0.00045267 | 0.00647574 up   |
| Plau     | 3.01820605 | 3.13E-13   | 1.56E-10 up     |
| Ppbp     | 3.98629082 | 0.00015654 | 0.00287512 up   |
| Prok2    | 3.72928329 | 8.53E-07   | 4.63E-05 up     |
| Sema3f   | 1.58657407 | 8.61E-05   | 0.00181817 up   |
| Sema4g   | -3.1702269 | 0.00047928 | 0.00675784 down |
| Sema6a   | -1.4042987 | 0.00094151 | 0.01095668 down |
| Sema6b   | 2.51511215 | 3.08E-05   | 0.00083287 up   |
| Sema6d   | -1.9531334 | 0.00197719 | 0.01908691 down |
| Tymp     | 1.52426486 | 0.0024759  | 0.02228672 up   |
| C5ar1    | 2.95311446 | 0.00070118 | 0.00886239 up   |
| Ackr3    | 2.34767481 | 1.38E-06   | 6.90E-05 up     |
| Ednra    | 1.32859207 | 0.00322799 | 0.02687709 up   |
| Ednrb    | 1.58038952 | 0.00017545 | 0.00314247 up   |
| Fpr1     | 4.46188403 | 4.32E-07   | 2.64E-05 up     |
| Fpr2     | 4.22102825 | 6.34E-07   | 3.58E-05 up     |
| C5ar2    | 2.7231254  | 4.66E-06   | 0.00018605 up   |
| Plaur    | 3.81578711 | 1.57E-21   | 5.16E-18 up     |
| Ptafr    | 2.19318772 | 0.00069177 | 0.00881149 up   |
| Adm      | 2.16541334 | 0.0028907  | 0.0248527 up    |
| Angptl7  | -2.6912218 | 0.00160716 | 0.01644728 down |
| Apln     | 3.68924337 | 3.51E-06   | 0.00014643 up   |
| Areg     | 4.38299695 | 2.74E-08   | 2.76E-06 up     |
| Manf     | 1.37380813 | 0.00061695 | 0.00809392 up   |
| Artn     | 2.2920014  | 0.00026554 | 0.00435227 up   |
| Bmp3     | -4.010105  | 0.00035372 | 0.00540724 down |

|         |            |            |                 |
|---------|------------|------------|-----------------|
| Btc     | -3.3076983 | 1.09E-05   | 0.00036724 down |
| Clcf1   | 3.51694494 | 2.30E-08   | 2.40E-06 up     |
| Cmtm2   | 2.6604154  | 9.50E-05   | 0.00194833 up   |
| Csf3    | 7.65407211 | 7.27E-13   | 3.24E-10 up     |
| Ccn2    | 2.02352286 | 0.0001466  | 0.00274801 up   |
| Epgn    | 4.25923765 | 0.00111615 | 0.01249767 up   |
| Ereg    | 4.03986913 | 1.23E-08   | 1.44E-06 up     |
| Fgf7    | 2.53175998 | 2.73E-05   | 0.00075763 up   |
| Fgf9    | -2.2476665 | 0.00141152 | 0.0149055 down  |
| Guca2a  | -7.1552501 | 2.96E-05   | 0.0008108 down  |
| Hbegf   | 2.75142125 | 5.36E-08   | 4.76E-06 up     |
| Igf1    | 3.29026986 | 1.56E-05   | 0.00048753 up   |
| Il11    | 6.35729966 | 4.30E-08   | 4.04E-06 up     |
| Il24    | 6.99090382 | 2.48E-07   | 1.69E-05 up     |
| Inhba   | 6.10031644 | 4.37E-09   | 6.45E-07 up     |
| Lif     | 5.14612036 | 5.57E-13   | 2.63E-10 up     |
| Mdk     | -1.6697955 | 0.00229163 | 0.0211255 down  |
| Nampt   | 4.33366817 | 1.49E-32   | 3.65E-28 up     |
| Ngf     | 1.94122716 | 0.00625825 | 0.04241356 up   |
| Nts     | -4.533267  | 0.00013807 | 0.00262638 down |
| Osm     | 4.35715131 | 3.73E-11   | 1.08E-08 up     |
| Endou   | 2.30034561 | 0.00275747 | 0.02411348 up   |
| Pgf     | 3.26999224 | 3.93E-08   | 3.78E-06 up     |
| Ptn     | -2.2530032 | 0.00122744 | 0.0134205 down  |
| Pyy     | -5.9456247 | 8.26E-05   | 0.00176134 down |
| Qrfp    | 3.09904007 | 6.37E-05   | 0.00143399 up   |
| Retn    | 6.33997974 | 7.84E-06   | 0.0002878 up    |
| Sectm1  | -1.9242669 | 0.00377123 | 0.02997138 down |
| Stc1    | 4.08737319 | 9.16E-09   | 1.17E-06 up     |
| Tgfb1   | 1.25558826 | 0.00073812 | 0.00919648 up   |
| Tgfb3   | 1.18582311 | 0.00088967 | 0.01049793 up   |
| Tnfsf14 | 2.61525756 | 0.00413459 | 0.03191069 up   |
| Tnfsf9  | 3.58727688 | 1.29E-05   | 0.00041741 up   |
| Acvr11  | 1.30225159 | 0.00029977 | 0.0047575 up    |
| Angptl4 | 2.29180889 | 0.00181715 | 0.01793534 up   |
| Avpr1b  | -2.7805225 | 0.00405072 | 0.03148134 down |
| Crlf1   | 2.75263125 | 1.25E-05   | 0.00040916 up   |
| Csf2ra  | 1.40013508 | 0.00192907 | 0.01873376 up   |
| Csf3r   | 3.14933957 | 5.81E-06   | 0.00022439 up   |
| Esrrg   | -2.0370773 | 0.00312354 | 0.02624119 down |
| Fgfr3   | -2.9725117 | 0.00423679 | 0.03244416 down |

|           |            |            |                 |
|-----------|------------|------------|-----------------|
| Flt1      | 2.32291657 | 0.00015231 | 0.00282081 up   |
| Hnf4g     | -4.3571792 | 0.00220354 | 0.02056746 down |
| Il11ra    | -1.529746  | 2.04E-08   | 2.15E-06 down   |
| Il13ra2   | 4.43627514 | 3.59E-05   | 0.00093427 up   |
| Il15ra    | 1.09222368 | 0.00236166 | 0.02150312 up   |
| Il17ra    | 1.37416224 | 0.00027065 | 0.00441254 up   |
| Il17rc    | -1.2305088 | 1.95E-09   | 3.22E-07 down   |
| Il17re    | -2.1613897 | 0.00429393 | 0.03273856 down |
| Il18r1    | 2.08209552 | 1.07E-09   | 1.92E-07 up     |
| Il18rap   | 1.6574332  | 0.00065845 | 0.00847441 up   |
| Il1r1     | 2.04301401 | 0.00015181 | 0.00281711 up   |
| Il1r2     | 5.26409733 | 2.31E-21   | 6.29E-18 up     |
| Il1rap    | 2.29595623 | 6.64E-23   | 4.07E-19 up     |
| Il1rl1    | 6.32359363 | 2.33E-09   | 3.71E-07 up     |
| Il1rl2    | 2.73811094 | 4.74E-10   | 9.68E-08 up     |
| Il20ra    | -1.3879352 | 0.00714674 | 0.0465935 down  |
| Il3ra     | 1.1947581  | 0.00392248 | 0.03077796 up   |
| Lgr4      | -1.2938959 | 0.00687551 | 0.04534357 down |
| Mchr1     | 2.50209466 | 2.91E-06   | 0.00012808 up   |
| Mpl       | -1.232087  | 0.00744295 | 0.04787542 down |
| Ngfr      | 2.23642765 | 0.0001277  | 0.00246744 up   |
| Nr1h4     | -4.5762417 | 0.00263391 | 0.02332265 down |
| Nr1i3     | -2.5190007 | 0.00102828 | 0.01169992 down |
| Nr3c2     | -2.2567669 | 8.05E-06   | 0.0002936 down  |
| Nr4a1     | 2.61267692 | 0.00041871 | 0.00610424 up   |
| Nr4a2     | 2.75326387 | 2.62E-06   | 0.00011789 up   |
| Nr4a3     | 5.71073417 | 7.54E-22   | 3.08E-18 up     |
| Osmr      | 2.64019085 | 6.97E-09   | 9.50E-07 up     |
| Pgr       | -2.1971614 | 0.0063389  | 0.04279453 down |
| Prlr      | -2.8573673 | 0.00200331 | 0.01924058 down |
| Ptgds     | -2.2325875 | 0.00126016 | 0.01368425 down |
| Ptger2    | 2.19313663 | 3.68E-05   | 0.0009433 up    |
| Rorc      | -3.0900764 | 0.00539538 | 0.03836711 down |
| Tnfrsf10d | 2.35450201 | 1.08E-06   | 5.63E-05 up     |
| Tnfrsf12a | 3.17002872 | 2.60E-07   | 1.75E-05 up     |
| Tnfrsf4   | 2.13337804 | 0.00075015 | 0.00929751 up   |
| Tubb3     | 2.97230958 | 1.96E-12   | 8.03E-10 up     |
| Vipr1     | -3.6333384 | 9.66E-06   | 0.00033758 down |
| Klrc1     | -2.0283864 | 0.00464736 | 0.0345732 down  |
| Icam1     | 4.2060724  | 3.51E-11   | 1.02E-08 up     |
| Fcgr3a    | 3.0171136  | 0.00260672 | 0.02313311 up   |

|        |            |            |            |      |
|--------|------------|------------|------------|------|
| Lcp2   | 1.31568582 | 0.00015683 | 0.00287837 | up   |
| Pik3r5 | 1.91931398 | 0.00240547 | 0.02183717 | up   |
| Shc1   | 1.25954354 | 1.12E-06   | 5.81E-05   | up   |
| Fos    | 1.10643494 | 0.0042841  | 0.03270424 | up   |
| Nfkb1  | 1.0318553  | 2.96E-05   | 0.0008108  | up   |
| Nfkbia | 1.99977174 | 5.99E-05   | 0.00136996 | up   |
| Nfkbie | 1.86407789 | 0.00057171 | 0.00768931 | up   |
| Map3k8 | 2.80582493 | 2.88E-10   | 6.49E-08   | up   |
| Trbv19 | -2.7763408 | 0.00082894 | 0.00999296 | down |
| Trdv1  | -3.9519606 | 0.00666901 | 0.04450888 | down |

**Table  
S7**

### Significant Enrichment Results of GO Analysis of FRGs

| Ontology ID | Description                                                   | GeneRatio | BgRatio   | pvalue | qvalue | Count |
|-------------|---------------------------------------------------------------|-----------|-----------|--------|--------|-------|
| BP          | GO:0006979 response to oxidative stress                       | 14/60     | 409/23328 | 0.0000 | 0.0000 | 14    |
| BP          | GO:0062012 regulation of small molecule metabolic process     | 11/60     | 358/23328 | 0.0000 | 0.0000 | 11    |
| BP          | GO:0009611 response to wounding                               | 11/60     | 492/23328 | 0.0000 | 0.0000 | 11    |
| BP          | GO:0048872 homeostasis of number of cells                     | 10/60     | 330/23328 | 0.0000 | 0.0000 | 10    |
| BP          | GO:0050727 regulation of inflammatory response                | 10/60     | 372/23328 | 0.0000 | 0.0000 | 10    |
| BP          | GO:0031331 positive regulation of cellular catabolic process  | 10/60     | 396/23328 | 0.0000 | 0.0000 | 10    |
| BP          | GO:2001233 regulation of apoptotic signaling pathway          | 10/60     | 413/23328 | 0.0000 | 0.0000 | 10    |
| BP          | GO:0070997 neuron death                                       | 10/60     | 416/23328 | 0.0000 | 0.0000 | 10    |
| BP          | GO:0006914 autophagy                                          | 10/60     | 425/23328 | 0.0000 | 0.0000 | 10    |
| BP          | GO:0061919 process utilizing autophagic mechanism             | 10/60     | 425/23328 | 0.0000 | 0.0000 | 10    |
| BP          | GO:0009896 positive regulation of catabolic process           | 10/60     | 463/23328 | 0.0000 | 0.0000 | 10    |
| BP          | GO:2001234 negative regulation of apoptotic signaling pathway | 9/60      | 231/23328 | 0.0000 | 0.0000 | 9     |
| BP          | GO:0006790 sulfur compound metabolic process                  | 9/60      | 279/23328 | 0.0000 | 0.0000 | 9     |
| BP          | GO:0062197 cellular response to chemical stress               | 9/60      | 332/23328 | 0.0000 | 0.0000 | 9     |
| BP          | GO:1901214 regulation of neuron death                         | 9/60      | 377/23328 | 0.0000 | 0.0000 | 9     |
| BP          | GO:0009991 response to extracellular stimulus                 | 9/60      | 378/23328 | 0.0000 | 0.0000 | 9     |
| BP          | GO:0015711 organic anion transport                            | 9/60      | 463/23328 | 0.0000 | 0.0001 | 9     |
| BP          | GO:0048732 gland development                                  | 9/60      | 471/23328 | 0.0000 | 0.0001 | 9     |

|    |            |                                                         |      |           |        |         |
|----|------------|---------------------------------------------------------|------|-----------|--------|---------|
| BP | GO:1901615 | organic hydroxy compound<br>metabolic process           | 9/60 | 498/23328 | 0.0000 | 0.00029 |
| BP | GO:1901215 | negative regulation of neuron<br>death                  | 8/60 | 251/23328 | 0.0000 | 0.00008 |
| BP | GO:0034599 | cellular response to oxidative<br>stress                | 8/60 | 276/23328 | 0.0000 | 0.00008 |
| BP | GO:0031667 | response to nutrient levels                             | 8/60 | 346/23328 | 0.0000 | 0.00018 |
| BP | GO:0042060 | wound healing                                           | 8/60 | 349/23328 | 0.0000 | 0.00018 |
| BP | GO:0006631 | fatty acid metabolic process                            | 8/60 | 408/23328 | 0.0000 | 0.00038 |
| BP | GO:0010876 | lipid localization                                      | 8/60 | 413/23328 | 0.0000 | 0.00038 |
| BP | GO:0001933 | negative regulation of protein<br>phosphorylation       | 8/60 | 425/23328 | 0.0000 | 0.00048 |
| BP | GO:0009117 | nucleotide metabolic process                            | 8/60 | 427/23328 | 0.0000 | 0.00048 |
| BP | GO:0006753 | nucleoside phosphate metabolic<br>process               | 8/60 | 436/23328 | 0.0000 | 0.00048 |
| BP | GO:0042326 | negative regulation of<br>phosphorylation               | 8/60 | 471/23328 | 0.0000 | 0.00058 |
| CC | GO:0045177 | apical part of cell                                     | 8/61 | 454/23271 | 0.0000 | 0.00158 |
| BP | GO:0046916 | cellular transition metal ion<br>homeostasis            | 7/60 | 104/23328 | 0.0000 | 0.00007 |
| BP | GO:0055076 | transition metal ion homeostasis                        | 7/60 | 134/23328 | 0.0000 | 0.00007 |
| BP | GO:0002262 | myeloid cell homeostasis                                | 7/60 | 187/23328 | 0.0000 | 0.00007 |
| BP | GO:0010506 | regulation of autophagy                                 | 7/60 | 278/23328 | 0.0000 | 0.00027 |
| BP | GO:0097193 | intrinsic apoptotic signaling<br>pathway                | 7/60 | 295/23328 | 0.0000 | 0.00037 |
| BP | GO:0071216 | cellular response to biotic<br>stimulus                 | 7/60 | 320/23328 | 0.0000 | 0.00047 |
| BP | GO:0009150 | purine ribonucleotide metabolic<br>process              | 7/60 | 324/23328 | 0.0000 | 0.00047 |
| BP | GO:0009259 | ribonucleotide metabolic<br>process                     | 7/60 | 334/23328 | 0.0000 | 0.00057 |
| BP | GO:0019693 | ribose phosphate metabolic<br>process                   | 7/60 | 345/23328 | 0.0000 | 0.00067 |
| BP | GO:0006163 | purine nucleotide metabolic<br>process                  | 7/60 | 354/23328 | 0.0000 | 0.00067 |
| BP | GO:0019216 | regulation of lipid metabolic<br>process                | 7/60 | 363/23328 | 0.0000 | 0.00077 |
| BP | GO:0006869 | lipid transport                                         | 7/60 | 364/23328 | 0.0000 | 0.00077 |
| BP | GO:0032496 | response to lipopolysaccharide                          | 7/60 | 368/23328 | 0.0000 | 0.00077 |
| BP | GO:0022411 | cellular component disassembly                          | 7/60 | 383/23328 | 0.0001 | 0.00087 |
| BP | GO:0032102 | negative regulation of response<br>to external stimulus | 7/60 | 384/23328 | 0.0001 | 0.00087 |

|    |            |                                                                            |      |           |        |        |   |
|----|------------|----------------------------------------------------------------------------|------|-----------|--------|--------|---|
| BP | GO:0002237 | response to molecule of bacterial origin                                   | 7/60 | 389/23328 | 0.0001 | 0.0009 | 7 |
| BP | GO:0072521 | purine-containing compound metabolic process                               | 7/60 | 396/23328 | 0.0001 | 0.0009 | 7 |
| BP | GO:0006091 | generation of precursor metabolites and energy                             | 7/60 | 400/23328 | 0.0001 | 0.0009 | 7 |
| BP | GO:1901652 | response to peptide                                                        | 7/60 | 400/23328 | 0.0001 | 0.0009 | 7 |
| BP | GO:0001819 | positive regulation of cytokine production                                 | 7/60 | 449/23328 | 0.0001 | 0.0015 | 7 |
| BP | GO:0002683 | negative regulation of immune system process                               | 7/60 | 462/23328 | 0.0002 | 0.0017 | 7 |
| BP | GO:0006879 | cellular iron ion homeostasis                                              | 6/60 | 64/23328  | 0.0000 | 0.0000 | 6 |
| BP | GO:0055072 | iron ion homeostasis                                                       | 6/60 | 92/23328  | 0.0000 | 0.0000 | 6 |
| BP | GO:0001776 | leukocyte homeostasis                                                      | 6/60 | 115/23328 | 0.0000 | 0.0000 | 6 |
| BP | GO:0006575 | cellular modified amino acid metabolic process                             | 6/60 | 165/23328 | 0.0000 | 0.0002 | 6 |
| BP | GO:2001236 | regulation of extrinsic apoptotic signaling pathway                        | 6/60 | 165/23328 | 0.0000 | 0.0002 | 6 |
| BP | GO:0098739 | import across plasma membrane                                              | 6/60 | 166/23328 | 0.0000 | 0.0002 | 6 |
| BP | GO:0042594 | response to starvation                                                     | 6/60 | 178/23328 | 0.0000 | 0.0002 | 6 |
| BP | GO:0046890 | regulation of lipid biosynthetic process                                   | 6/60 | 184/23328 | 0.0000 | 0.0002 | 6 |
| BP | GO:0001666 | response to hypoxia                                                        | 6/60 | 208/23328 | 0.0000 | 0.0004 | 6 |
| BP | GO:0042180 | cellular ketone metabolic process                                          | 6/60 | 211/23328 | 0.0000 | 0.0004 | 6 |
| BP | GO:0002819 | regulation of adaptive immune response                                     | 6/60 | 213/23328 | 0.0000 | 0.0004 | 6 |
| BP | GO:0098656 | anion transmembrane transport                                              | 6/60 | 221/23328 | 0.0000 | 0.0005 | 6 |
| BP | GO:0097191 | extrinsic apoptotic signaling pathway                                      | 6/60 | 233/23328 | 0.0000 | 0.0006 | 6 |
| BP | GO:0036293 | response to decreased oxygen levels                                        | 6/60 | 234/23328 | 0.0000 | 0.0006 | 6 |
| BP | GO:1903320 | regulation of protein modification by small protein conjugation or removal | 6/60 | 240/23328 | 0.0000 | 0.0006 | 6 |
| BP | GO:0034976 | response to endoplasmic reticulum stress                                   | 6/60 | 249/23328 | 0.0000 | 0.0007 | 6 |
| BP | GO:0098657 | import into cell                                                           | 6/60 | 251/23328 | 0.0000 | 0.0007 | 6 |
| BP | GO:0051348 | negative regulation of transferase activity                                | 6/60 | 260/23328 | 0.0001 | 0.0008 | 6 |
| BP | GO:0045926 | negative regulation of growth                                              | 6/60 | 264/23328 | 0.0001 | 0.0009 | 6 |

|    |            |                                                              |      |           |        |        |   |
|----|------------|--------------------------------------------------------------|------|-----------|--------|--------|---|
| BP | GO:0071222 | cellular response to lipopolysaccharide                      | 6/60 | 285/23328 | 0.0001 | 0.0011 | 6 |
| BP | GO:0070482 | response to oxygen levels                                    | 6/60 | 287/23328 | 0.0001 | 0.0011 | 6 |
| BP | GO:0072593 | reactive oxygen species metabolic process                    | 6/60 | 292/23328 | 0.0001 | 0.0012 | 6 |
| BP | GO:0071219 | cellular response to molecule of bacterial origin            | 6/60 | 295/23328 | 0.0001 | 0.0012 | 6 |
| BP | GO:0060326 | cell chemotaxis                                              | 6/60 | 303/23328 | 0.0001 | 0.0013 | 6 |
| BP | GO:0070372 | regulation of ERK1 and ERK2 cascade                          | 6/60 | 308/23328 | 0.0001 | 0.0014 | 6 |
| BP | GO:0009895 | negative regulation of catabolic process                     | 6/60 | 311/23328 | 0.0001 | 0.0015 | 6 |
| BP | GO:0070371 | ERK1 and ERK2 cascade                                        | 6/60 | 325/23328 | 0.0002 | 0.0018 | 6 |
| BP | GO:0046942 | carboxylic acid transport                                    | 6/60 | 333/23328 | 0.0002 | 0.0020 | 6 |
| BP | GO:0015849 | organic acid transport                                       | 6/60 | 337/23328 | 0.0002 | 0.0020 | 6 |
| BP | GO:0050878 | regulation of body fluid levels                              | 6/60 | 354/23328 | 0.0003 | 0.0024 | 6 |
| BP | GO:0001503 | ossification                                                 | 6/60 | 394/23328 | 0.0005 | 0.0038 | 6 |
| BP | GO:0034248 | regulation of cellular amide metabolic process               | 6/60 | 410/23328 | 0.0006 | 0.0043 | 6 |
| BP | GO:0051090 | regulation of DNA-binding transcription factor activity      | 6/60 | 415/23328 | 0.0007 | 0.0045 | 6 |
| BP | GO:0072594 | establishment of protein localization to organelle           | 6/60 | 426/23328 | 0.0008 | 0.0049 | 6 |
| BP | GO:0022407 | regulation of cell-cell adhesion                             | 6/60 | 427/23328 | 0.0008 | 0.0049 | 6 |
| BP | GO:0090407 | organophosphate biosynthetic process                         | 6/60 | 427/23328 | 0.0008 | 0.0049 | 6 |
| BP | GO:0001558 | regulation of cell growth                                    | 6/60 | 438/23328 | 0.0009 | 0.0053 | 6 |
| MF | GO:0008509 | anion transmembrane transporter activity                     | 6/58 | 336/22669 | 0.0002 | 0.0080 | 6 |
| MF | GO:0033218 | amide binding                                                | 6/58 | 391/22669 | 0.0005 | 0.0103 | 6 |
| BP | GO:0043648 | dicarboxylic acid metabolic process                          | 5/60 | 85/23328  | 0.0000 | 0.0001 | 5 |
| BP | GO:2001237 | negative regulation of extrinsic apoptotic signaling pathway | 5/60 | 101/23328 | 0.0000 | 0.0002 | 5 |
| BP | GO:0030282 | bone mineralization                                          | 5/60 | 120/23328 | 0.0000 | 0.0004 | 5 |
| BP | GO:0042542 | response to hydrogen peroxide                                | 5/60 | 121/23328 | 0.0000 | 0.0004 | 5 |
| BP | GO:1905039 | carboxylic acid transmembrane transport                      | 5/60 | 124/23328 | 0.0000 | 0.0004 | 5 |
| BP | GO:1903825 | organic acid transmembrane transport                         | 5/60 | 125/23328 | 0.0000 | 0.0004 | 5 |
| BP | GO:0001889 | liver development                                            | 5/60 | 126/23328 | 0.0000 | 0.0004 | 5 |

|    |            |                                                     |      |           |        |        |   |
|----|------------|-----------------------------------------------------|------|-----------|--------|--------|---|
| BP | GO:0061008 | hepaticobiliary system development                  | 5/60 | 129/23328 | 0.0000 | 0.0004 | 5 |
| BP | GO:0010565 | regulation of cellular ketone metabolic process     | 5/60 | 139/23328 | 0.0000 | 0.0006 | 5 |
| BP | GO:1902652 | secondary alcohol metabolic process                 | 5/60 | 141/23328 | 0.0000 | 0.0006 | 5 |
| BP | GO:0006633 | fatty acid biosynthetic process                     | 5/60 | 145/23328 | 0.0000 | 0.0006 | 5 |
| BP | GO:0050728 | negative regulation of inflammatory response        | 5/60 | 156/23328 | 0.0001 | 0.0008 | 5 |
| BP | GO:0031214 | biomineral tissue development                       | 5/60 | 162/23328 | 0.0001 | 0.0009 | 5 |
| BP | GO:0110148 | biomineralization                                   | 5/60 | 162/23328 | 0.0001 | 0.0009 | 5 |
| BP | GO:0048660 | regulation of smooth muscle cell proliferation      | 5/60 | 165/23328 | 0.0001 | 0.0009 | 5 |
| BP | GO:0048659 | smooth muscle cell proliferation                    | 5/60 | 170/23328 | 0.0001 | 0.0009 | 5 |
| BP | GO:1901605 | alpha-amino acid metabolic process                  | 5/60 | 180/23328 | 0.0001 | 0.0012 | 5 |
| BP | GO:0043524 | negative regulation of neuron apoptotic process     | 5/60 | 182/23328 | 0.0001 | 0.0012 | 5 |
| BP | GO:0006109 | regulation of carbohydrate metabolic process        | 5/60 | 195/23328 | 0.0001 | 0.0015 | 5 |
| BP | GO:0072330 | monocarboxylic acid biosynthetic process            | 5/60 | 196/23328 | 0.0001 | 0.0015 | 5 |
| BP | GO:0000302 | response to reactive oxygen species                 | 5/60 | 202/23328 | 0.0002 | 0.0017 | 5 |
| BP | GO:0031396 | regulation of protein ubiquitination                | 5/60 | 206/23328 | 0.0002 | 0.0018 | 5 |
| BP | GO:0006469 | negative regulation of protein kinase activity      | 5/60 | 207/23328 | 0.0002 | 0.0018 | 5 |
| BP | GO:0043542 | endothelial cell migration                          | 5/60 | 212/23328 | 0.0002 | 0.0020 | 5 |
| BP | GO:0031668 | cellular response to extracellular stimulus         | 5/60 | 217/23328 | 0.0002 | 0.0021 | 5 |
| BP | GO:0048545 | response to steroid hormone                         | 5/60 | 218/23328 | 0.0002 | 0.0021 | 5 |
| BP | GO:0033673 | negative regulation of kinase activity              | 5/60 | 227/23328 | 0.0003 | 0.0024 | 5 |
| BP | GO:0031348 | negative regulation of defense response             | 5/60 | 228/23328 | 0.0003 | 0.0025 | 5 |
| BP | GO:0033002 | muscle cell proliferation                           | 5/60 | 236/23328 | 0.0004 | 0.0028 | 5 |
| BP | GO:0015980 | energy derivation by oxidation of organic compounds | 5/60 | 248/23328 | 0.0004 | 0.0034 | 5 |
| BP | GO:0006520 | cellular amino acid metabolic process               | 5/60 | 250/23328 | 0.0005 | 0.0034 | 5 |
| BP | GO:0045444 | fat cell differentiation                            | 5/60 | 252/23328 | 0.0005 | 0.0035 | 5 |



|    |            |                                                      |      |           |        |        |   |
|----|------------|------------------------------------------------------|------|-----------|--------|--------|---|
| BP | GO:0005996 | monosaccharide metabolic process                     | 5/60 | 261/23328 | 0.0006 | 0.0040 | 5 |
| BP | GO:0022409 | positive regulation of cell-cell adhesion            | 5/60 | 265/23328 | 0.0006 | 0.0042 | 5 |
| BP | GO:0043523 | regulation of neuron apoptotic process               | 5/60 | 270/23328 | 0.0007 | 0.0044 | 5 |
| BP | GO:0010038 | response to metal ion                                | 5/60 | 274/23328 | 0.0007 | 0.0045 | 5 |
| BP | GO:0071496 | cellular response to external stimulus               | 5/60 | 280/23328 | 0.0008 | 0.0048 | 5 |
| BP | GO:0044262 | cellular carbohydrate metabolic process              | 5/60 | 292/23328 | 0.0009 | 0.0054 | 5 |
| BP | GO:0010631 | epithelial cell migration                            | 5/60 | 295/23328 | 0.0010 | 0.0056 | 5 |
| BP | GO:0090132 | epithelium migration                                 | 5/60 | 297/23328 | 0.0010 | 0.0057 | 5 |
| BP | GO:0051402 | neuron apoptotic process                             | 5/60 | 298/23328 | 0.0010 | 0.0058 | 5 |
| BP | GO:0046394 | carboxylic acid biosynthetic process                 | 5/60 | 299/23328 | 0.0010 | 0.0058 | 5 |
| BP | GO:0090130 | tissue migration                                     | 5/60 | 299/23328 | 0.0010 | 0.0058 | 5 |
| BP | GO:1901653 | cellular response to peptide                         | 5/60 | 299/23328 | 0.0010 | 0.0058 | 5 |
| BP | GO:0016053 | organic acid biosynthetic process                    | 5/60 | 300/23328 | 0.0010 | 0.0058 | 5 |
| BP | GO:0008202 | steroid metabolic process                            | 5/60 | 309/23328 | 0.0012 | 0.0062 | 5 |
| BP | GO:0006066 | alcohol metabolic process                            | 5/60 | 323/23328 | 0.0014 | 0.0070 | 5 |
| BP | GO:0032386 | regulation of intracellular transport                | 5/60 | 329/23328 | 0.0016 | 0.0075 | 5 |
| BP | GO:0019221 | cytokine-mediated signaling pathway                  | 5/60 | 369/23328 | 0.0026 | 0.0103 | 5 |
| BP | GO:0009914 | hormone transport                                    | 5/60 | 372/23328 | 0.0027 | 0.0106 | 5 |
| BP | GO:0042176 | regulation of protein catabolic process              | 5/60 | 395/23328 | 0.0035 | 0.0124 | 5 |
| BP | GO:0009314 | response to radiation                                | 5/60 | 401/23328 | 0.0037 | 0.0130 | 5 |
| BP | GO:0032103 | positive regulation of response to external stimulus | 5/60 | 418/23328 | 0.0044 | 0.0151 | 5 |
| BP | GO:1903706 | regulation of hemopoiesis                            | 5/60 | 424/23328 | 0.0047 | 0.0157 | 5 |
| BP | GO:0001667 | ameboidal-type cell migration                        | 5/60 | 427/23328 | 0.0048 | 0.0160 | 5 |
| BP | GO:0010959 | regulation of metal ion transport                    | 5/60 | 427/23328 | 0.0048 | 0.0160 | 5 |
| BP | GO:0045785 | positive regulation of cell adhesion                 | 5/60 | 435/23328 | 0.0052 | 0.0170 | 5 |
| BP | GO:0002697 | regulation of immune effector process                | 5/60 | 440/23328 | 0.0054 | 0.0176 | 5 |
| BP | GO:1901361 | organic cyclic compound catabolic process            | 5/60 | 442/23328 | 0.0055 | 0.0177 | 5 |

|    |            |                                                                                           |      |           |        |        |   |
|----|------------|-------------------------------------------------------------------------------------------|------|-----------|--------|--------|---|
| BP | GO:0045666 | positive regulation of neuron differentiation                                             | 5/60 | 472/23328 | 0.0073 | 0.0216 | 5 |
| BP | GO:0007005 | mitochondrion organization                                                                | 5/60 | 481/23328 | 0.0079 | 0.0227 | 5 |
| CC | GO:0005811 | lipid droplet                                                                             | 5/61 | 89/23271  | 0.0000 | 0.0005 | 5 |
| CC | GO:0016323 | basolateral plasma membrane                                                               | 5/61 | 259/23271 | 0.0006 | 0.0109 | 5 |
| CC | GO:0016324 | apical plasma membrane                                                                    | 5/61 | 350/23271 | 0.0022 | 0.0289 | 5 |
| CC | GO:0000323 | lytic vacuole                                                                             | 5/61 | 460/23271 | 0.0071 | 0.0510 | 5 |
| CC | GO:0005764 | lysosome                                                                                  | 5/61 | 460/23271 | 0.0071 | 0.0510 | 5 |
| MF | GO:0008514 | organic anion transmembrane transporter activity                                          | 5/58 | 220/22669 | 0.0002 | 0.0080 | 5 |
| MF | GO:0031625 | ubiquitin protein ligase binding                                                          | 5/58 | 306/22669 | 0.0011 | 0.0132 | 5 |
| MF | GO:0044389 | ubiquitin-like protein ligase binding                                                     | 5/58 | 324/22669 | 0.0014 | 0.0132 | 5 |
| MF | GO:0048018 | receptor ligand activity                                                                  | 5/58 | 499/22669 | 0.0089 | 0.0373 | 5 |
| BP | GO:0006534 | cysteine metabolic process                                                                | 4/60 | 12/23328  | 0.0000 | 0.0000 | 4 |
| BP | GO:0000096 | sulfur amino acid metabolic process                                                       | 4/60 | 34/23328  | 0.0000 | 0.0001 | 4 |
| BP | GO:0009069 | serine family amino acid metabolic process                                                | 4/60 | 34/23328  | 0.0000 | 0.0001 | 4 |
| BP | GO:0043620 | regulation of DNA-templated transcription in response to stress                           | 4/60 | 51/23328  | 0.0000 | 0.0003 | 4 |
| BP | GO:0006749 | glutathione metabolic process                                                             | 4/60 | 57/23328  | 0.0000 | 0.0004 | 4 |
| BP | GO:0043536 | positive regulation of blood vessel endothelial cell migration                            | 4/60 | 57/23328  | 0.0000 | 0.0004 | 4 |
| BP | GO:0009060 | aerobic respiration                                                                       | 4/60 | 74/23328  | 0.0000 | 0.0007 | 4 |
| BP | GO:0006094 | gluconeogenesis                                                                           | 4/60 | 76/23328  | 0.0000 | 0.0007 | 4 |
| BP | GO:0002260 | lymphocyte homeostasis                                                                    | 4/60 | 79/23328  | 0.0001 | 0.0008 | 4 |
| BP | GO:0019319 | hexose biosynthetic process                                                               | 4/60 | 79/23328  | 0.0001 | 0.0008 | 4 |
| BP | GO:0006637 | acyl-CoA metabolic process                                                                | 4/60 | 83/23328  | 0.0001 | 0.0009 | 4 |
| BP | GO:0035383 | thioester metabolic process                                                               | 4/60 | 83/23328  | 0.0001 | 0.0009 | 4 |
| BP | GO:0043154 | negative regulation of cysteine-type endopeptidase activity involved in apoptotic process | 4/60 | 84/23328  | 0.0001 | 0.0009 | 4 |
| BP | GO:0051384 | response to glucocorticoid                                                                | 4/60 | 84/23328  | 0.0001 | 0.0009 | 4 |
| BP | GO:0046364 | monosaccharide biosynthetic process                                                       | 4/60 | 85/23328  | 0.0001 | 0.0009 | 4 |
| BP | GO:0044272 | sulfur compound biosynthetic process                                                      | 4/60 | 86/23328  | 0.0001 | 0.0009 | 4 |
| BP | GO:0031960 | response to corticosteroid                                                                | 4/60 | 88/23328  | 0.0001 | 0.0010 | 4 |

|    |            |                                                                                     |      |           |        |         |
|----|------------|-------------------------------------------------------------------------------------|------|-----------|--------|---------|
| BP | GO:1903321 | negative regulation of protein modification by small protein conjugation or removal | 4/60 | 88/23328  | 0.0001 | 0.00104 |
| BP | GO:2000117 | negative regulation of cysteine-type endopeptidase activity                         | 4/60 | 91/23328  | 0.0001 | 0.00114 |
| BP | GO:0043535 | regulation of blood vessel endothelial cell migration                               | 4/60 | 94/23328  | 0.0001 | 0.00124 |
| BP | GO:1904035 | regulation of epithelial cell apoptotic process                                     | 4/60 | 94/23328  | 0.0001 | 0.00124 |
| BP | GO:2001243 | negative regulation of intrinsic apoptotic signaling pathway                        | 4/60 | 95/23328  | 0.0001 | 0.00124 |
| BP | GO:0019217 | regulation of fatty acid metabolic process                                          | 4/60 | 97/23328  | 0.0001 | 0.00124 |
| BP | GO:0033865 | nucleoside bisphosphate metabolic process                                           | 4/60 | 99/23328  | 0.0001 | 0.00134 |
| BP | GO:0033875 | ribonucleoside bisphosphate metabolic process                                       | 4/60 | 99/23328  | 0.0001 | 0.00134 |
| BP | GO:0034032 | purine nucleoside bisphosphate metabolic process                                    | 4/60 | 99/23328  | 0.0001 | 0.00134 |
| BP | GO:0010595 | positive regulation of endothelial cell migration                                   | 4/60 | 103/23328 | 0.0001 | 0.00154 |
| BP | GO:0048661 | positive regulation of smooth muscle cell proliferation                             | 4/60 | 108/23328 | 0.0002 | 0.00174 |
| BP | GO:0001676 | long-chain fatty acid metabolic process                                             | 4/60 | 111/23328 | 0.0002 | 0.00184 |
| BP | GO:0009636 | response to toxic substance                                                         | 4/60 | 116/23328 | 0.0002 | 0.00204 |
| BP | GO:0006986 | response to unfolded protein                                                        | 4/60 | 117/23328 | 0.0002 | 0.00214 |
| BP | GO:1904019 | epithelial cell apoptotic process                                                   | 4/60 | 118/23328 | 0.0002 | 0.00214 |
| BP | GO:0043534 | blood vessel endothelial cell migration                                             | 4/60 | 119/23328 | 0.0003 | 0.00224 |
| BP | GO:0120254 | olefinic compound metabolic process                                                 | 4/60 | 126/23328 | 0.0003 | 0.00264 |
| BP | GO:0008203 | cholesterol metabolic process                                                       | 4/60 | 130/23328 | 0.0004 | 0.00284 |
| BP | GO:0071887 | leukocyte apoptotic process                                                         | 4/60 | 138/23328 | 0.0004 | 0.00344 |
| BP | GO:0016125 | sterol metabolic process                                                            | 4/60 | 139/23328 | 0.0005 | 0.00344 |
| BP | GO:0035966 | response to topologically incorrect protein                                         | 4/60 | 141/23328 | 0.0005 | 0.00354 |
| BP | GO:0010508 | positive regulation of autophagy                                                    | 4/60 | 144/23328 | 0.0005 | 0.00384 |
| BP | GO:1903364 | positive regulation of cellular protein catabolic process                           | 4/60 | 145/23328 | 0.0005 | 0.00384 |
| BP | GO:0045598 | regulation of fat cell differentiation                                              | 4/60 | 146/23328 | 0.0005 | 0.00394 |

|    |            |                                                                  |      |           |        |        |   |
|----|------------|------------------------------------------------------------------|------|-----------|--------|--------|---|
| BP | GO:0010634 | positive regulation of epithelial cell migration                 | 4/60 | 150/23328 | 0.0006 | 0.0042 | 4 |
| BP | GO:0008643 | carbohydrate transport                                           | 4/60 | 151/23328 | 0.0006 | 0.0043 | 4 |
| BP | GO:0022612 | gland morphogenesis                                              | 4/60 | 154/23328 | 0.0007 | 0.0044 | 4 |
| BP | GO:1901568 | fatty acid derivative metabolic process                          | 4/60 | 154/23328 | 0.0007 | 0.0044 | 4 |
| BP | GO:0009267 | cellular response to starvation                                  | 4/60 | 156/23328 | 0.0007 | 0.0045 | 4 |
| BP | GO:0071248 | cellular response to metal ion                                   | 4/60 | 156/23328 | 0.0007 | 0.0045 | 4 |
| BP | GO:0045333 | cellular respiration                                             | 4/60 | 157/23328 | 0.0007 | 0.0046 | 4 |
| BP | GO:0062013 | positive regulation of small molecule metabolic process          | 4/60 | 157/23328 | 0.0007 | 0.0046 | 4 |
| BP | GO:0010675 | regulation of cellular carbohydrate metabolic process            | 4/60 | 162/23328 | 0.0008 | 0.0050 | 4 |
| BP | GO:0033135 | regulation of peptidyl-serine phosphorylation                    | 4/60 | 164/23328 | 0.0008 | 0.0051 | 4 |
| BP | GO:0043433 | negative regulation of DNA-binding transcription factor activity | 4/60 | 164/23328 | 0.0008 | 0.0051 | 4 |
| BP | GO:1905952 | regulation of lipid localization                                 | 4/60 | 165/23328 | 0.0009 | 0.0051 | 4 |
| BP | GO:0010594 | regulation of endothelial cell migration                         | 4/60 | 166/23328 | 0.0009 | 0.0052 | 4 |
| BP | GO:2001242 | regulation of intrinsic apoptotic signaling pathway              | 4/60 | 167/23328 | 0.0009 | 0.0053 | 4 |
| BP | GO:0043271 | negative regulation of ion transport                             | 4/60 | 174/23328 | 0.0011 | 0.0058 | 4 |
| BP | GO:0007612 | learning                                                         | 4/60 | 175/23328 | 0.0011 | 0.0058 | 4 |
| BP | GO:0035296 | regulation of tube diameter                                      | 4/60 | 176/23328 | 0.0011 | 0.0058 | 4 |
| BP | GO:0097746 | regulation of blood vessel diameter                              | 4/60 | 176/23328 | 0.0011 | 0.0058 | 4 |
| BP | GO:0035150 | regulation of tube size                                          | 4/60 | 177/23328 | 0.0011 | 0.0059 | 4 |
| BP | GO:0010951 | negative regulation of endopeptidase activity                    | 4/60 | 182/23328 | 0.0012 | 0.0064 | 4 |
| BP | GO:0043122 | regulation of I-kappaB kinase/NF-kappaB signaling                | 4/60 | 185/23328 | 0.0013 | 0.0066 | 4 |
| BP | GO:0031669 | cellular response to nutrient levels                             | 4/60 | 188/23328 | 0.0014 | 0.0069 | 4 |
| BP | GO:0045766 | positive regulation of angiogenesis                              | 4/60 | 188/23328 | 0.0014 | 0.0069 | 4 |
| BP | GO:0050796 | regulation of insulin secretion                                  | 4/60 | 190/23328 | 0.0015 | 0.0070 | 4 |
| BP | GO:0042445 | hormone metabolic process                                        | 4/60 | 196/23328 | 0.0016 | 0.0077 | 4 |
| BP | GO:0016051 | carbohydrate biosynthetic process                                | 4/60 | 197/23328 | 0.0017 | 0.0078 | 4 |

|    |            |                                                                                  |      |           |        |        |   |
|----|------------|----------------------------------------------------------------------------------|------|-----------|--------|--------|---|
| BP | GO:0030308 | negative regulation of cell growth                                               | 4/60 | 199/23328 | 0.0017 | 0.0080 | 4 |
| BP | GO:0006006 | glucose metabolic process                                                        | 4/60 | 202/23328 | 0.0018 | 0.0083 | 4 |
| BP | GO:0016236 | macroautophagy                                                                   | 4/60 | 205/23328 | 0.0019 | 0.0086 | 4 |
| BP | GO:0030522 | intracellular receptor signaling pathway                                         | 4/60 | 207/23328 | 0.0020 | 0.0088 | 4 |
| BP | GO:2000377 | regulation of reactive oxygen species metabolic process                          | 4/60 | 207/23328 | 0.0020 | 0.0088 | 4 |
| BP | GO:1904018 | positive regulation of vasculature development                                   | 4/60 | 208/23328 | 0.0020 | 0.0088 | 4 |
| BP | GO:0043281 | regulation of cysteine-type endopeptidase activity involved in apoptotic process | 4/60 | 209/23328 | 0.0021 | 0.0088 | 4 |
| BP | GO:0050866 | negative regulation of cell activation                                           | 4/60 | 210/23328 | 0.0021 | 0.0089 | 4 |
| BP | GO:0007249 | I-kappaB kinase/NF-kappaB signaling                                              | 4/60 | 215/23328 | 0.0023 | 0.0095 | 4 |
| BP | GO:0070374 | positive regulation of ERK1 and ERK2 cascade                                     | 4/60 | 216/23328 | 0.0023 | 0.0097 | 4 |
| BP | GO:0030595 | leukocyte chemotaxis                                                             | 4/60 | 219/23328 | 0.0024 | 0.0100 | 4 |
| BP | GO:0097529 | myeloid leukocyte migration                                                      | 4/60 | 219/23328 | 0.0024 | 0.0100 | 4 |
| BP | GO:1903039 | positive regulation of leukocyte cell-cell adhesion                              | 4/60 | 221/23328 | 0.0025 | 0.0102 | 4 |
| BP | GO:0045732 | positive regulation of protein catabolic process                                 | 4/60 | 222/23328 | 0.0026 | 0.0103 | 4 |
| BP | GO:0003018 | vascular process in circulatory system                                           | 4/60 | 224/23328 | 0.0027 | 0.0105 | 4 |
| BP | GO:0050920 | regulation of chemotaxis                                                         | 4/60 | 224/23328 | 0.0027 | 0.0105 | 4 |
| BP | GO:1901617 | organic hydroxy compound biosynthetic process                                    | 4/60 | 225/23328 | 0.0027 | 0.0106 | 4 |
| BP | GO:0071241 | cellular response to inorganic substance                                         | 4/60 | 227/23328 | 0.0028 | 0.0108 | 4 |
| BP | GO:0030073 | insulin secretion                                                                | 4/60 | 229/23328 | 0.0029 | 0.0109 | 4 |
| BP | GO:0019318 | hexose metabolic process                                                         | 4/60 | 231/23328 | 0.0030 | 0.0111 | 4 |
| BP | GO:2000116 | regulation of cysteine-type endopeptidase activity                               | 4/60 | 234/23328 | 0.0031 | 0.0115 | 4 |
| BP | GO:0010632 | regulation of epithelial cell migration                                          | 4/60 | 235/23328 | 0.0031 | 0.0116 | 4 |
| BP | GO:0090276 | regulation of peptide hormone secretion                                          | 4/60 | 235/23328 | 0.0031 | 0.0116 | 4 |
| BP | GO:0010466 | negative regulation of peptidase activity                                        | 4/60 | 246/23328 | 0.0037 | 0.0131 | 4 |

|    |            |                                                   |      |           |        |        |   |
|----|------------|---------------------------------------------------|------|-----------|--------|--------|---|
| BP | GO:0031330 | negative regulation of cellular catabolic process | 4/60 | 250/23328 | 0.0039 | 0.0137 | 4 |
| BP | GO:1903362 | regulation of cellular protein catabolic process  | 4/60 | 254/23328 | 0.0042 | 0.0143 | 4 |
| BP | GO:0001818 | negative regulation of cytokine production        | 4/60 | 260/23328 | 0.0045 | 0.0153 | 4 |
| BP | GO:0043588 | skin development                                  | 4/60 | 275/23328 | 0.0055 | 0.0176 | 4 |
| BP | GO:0002366 | leukocyte activation involved in immune response  | 4/60 | 285/23328 | 0.0062 | 0.0193 | 4 |
| BP | GO:0030072 | peptide hormone secretion                         | 4/60 | 285/23328 | 0.0062 | 0.0193 | 4 |
| BP | GO:0009615 | response to virus                                 | 4/60 | 286/23328 | 0.0063 | 0.0194 | 4 |
| BP | GO:0002263 | cell activation involved in immune response       | 4/60 | 289/23328 | 0.0065 | 0.0199 | 4 |
| BP | GO:0009416 | response to light stimulus                        | 4/60 | 298/23328 | 0.0073 | 0.0216 | 4 |
| BP | GO:0007611 | learning or memory                                | 4/60 | 299/23328 | 0.0073 | 0.0216 | 4 |
| BP | GO:0046883 | regulation of hormone secretion                   | 4/60 | 303/23328 | 0.0077 | 0.0224 | 4 |
| BP | GO:1903037 | regulation of leukocyte cell-cell adhesion        | 4/60 | 309/23328 | 0.0082 | 0.0233 | 4 |
| BP | GO:0044282 | small molecule catabolic process                  | 4/60 | 320/23328 | 0.0093 | 0.0248 | 4 |
| BP | GO:0045765 | regulation of angiogenesis                        | 4/60 | 320/23328 | 0.0093 | 0.0248 | 4 |
| BP | GO:0050863 | regulation of T cell activation                   | 4/60 | 321/23328 | 0.0094 | 0.0250 | 4 |
| BP | GO:0016042 | lipid catabolic process                           | 4/60 | 324/23328 | 0.0097 | 0.0255 | 4 |
| BP | GO:0018105 | peptidyl-serine phosphorylation                   | 4/60 | 331/23328 | 0.0104 | 0.0270 | 4 |
| BP | GO:0043434 | response to peptide hormone                       | 4/60 | 336/23328 | 0.0109 | 0.0280 | 4 |
| BP | GO:0050890 | cognition                                         | 4/60 | 336/23328 | 0.0109 | 0.0280 | 4 |
| BP | GO:0007159 | leukocyte cell-cell adhesion                      | 4/60 | 345/23328 | 0.0120 | 0.0301 | 4 |
| BP | GO:0052548 | regulation of endopeptidase activity              | 4/60 | 346/23328 | 0.0121 | 0.0303 | 4 |
| BP | GO:0051222 | positive regulation of protein transport          | 4/60 | 348/23328 | 0.0123 | 0.0308 | 4 |
| BP | GO:0045861 | negative regulation of proteolysis                | 4/60 | 350/23328 | 0.0126 | 0.0311 | 4 |
| BP | GO:0006417 | regulation of translation                         | 4/60 | 355/23328 | 0.0132 | 0.0321 | 4 |
| BP | GO:0050806 | positive regulation of synaptic transmission      | 4/60 | 355/23328 | 0.0132 | 0.0321 | 4 |
| BP | GO:1901342 | regulation of vasculature development             | 4/60 | 356/23328 | 0.0133 | 0.0323 | 4 |
| BP | GO:0018209 | peptidyl-serine modification                      | 4/60 | 357/23328 | 0.0134 | 0.0325 | 4 |
| BP | GO:0050900 | leukocyte migration                               | 4/60 | 360/23328 | 0.0138 | 0.0330 | 4 |

|    |            |                                                                    |      |           |        |        |   |
|----|------------|--------------------------------------------------------------------|------|-----------|--------|--------|---|
| BP | GO:1904062 | regulation of cation<br>transmembrane transport                    | 4/60 | 361/23328 | 0.0139 | 0.0332 | 4 |
| BP | GO:0046879 | hormone secretion                                                  | 4/60 | 364/23328 | 0.0143 | 0.0337 | 4 |
| BP | GO:1904951 | positive regulation of<br>establishment of protein<br>localization | 4/60 | 364/23328 | 0.0143 | 0.0337 | 4 |
| BP | GO:0050708 | regulation of protein secretion<br>transmembrane receptor protein  | 4/60 | 365/23328 | 0.0145 | 0.0337 | 4 |
| BP | GO:0007178 | serine/threonine kinase<br>signaling pathway                       | 4/60 | 368/23328 | 0.0149 | 0.0344 | 4 |
| BP | GO:1902903 | regulation of supramolecular<br>fiber organization                 | 4/60 | 370/23328 | 0.0151 | 0.0350 | 4 |
| BP | GO:0010976 | positive regulation of neuron<br>projection development            | 4/60 | 372/23328 | 0.0154 | 0.0355 | 4 |
| BP | GO:0050678 | regulation of epithelial cell<br>proliferation                     | 4/60 | 372/23328 | 0.0154 | 0.0355 | 4 |
| BP | GO:0044403 | symbiotic process                                                  | 4/60 | 374/23328 | 0.0157 | 0.0359 | 4 |
| BP | GO:0010721 | negative regulation of cell<br>development                         | 4/60 | 387/23328 | 0.0175 | 0.0393 | 4 |
| BP | GO:0051346 | negative regulation of hydrolase<br>activity                       | 4/60 | 405/23328 | 0.0204 | 0.0441 | 4 |
| BP | GO:0002791 | regulation of peptide secretion                                    | 4/60 | 406/23328 | 0.0205 | 0.0444 | 4 |
| BP | GO:0030098 | lymphocyte differentiation                                         | 4/60 | 409/23328 | 0.0210 | 0.0452 | 4 |
| BP | GO:0032535 | regulation of cellular<br>component size                           | 4/60 | 413/23328 | 0.0217 | 0.0460 | 4 |
| BP | GO:0007517 | muscle organ development                                           | 4/60 | 420/23328 | 0.0229 | 0.0483 | 4 |
| BP | GO:0052547 | regulation of peptidase activity                                   | 4/60 | 421/23328 | 0.0231 | 0.0483 | 4 |
| BP | GO:0060249 | anatomical structure<br>homeostasis                                | 4/60 | 422/23328 | 0.0233 | 0.0486 | 4 |
| BP | GO:0050673 | epithelial cell proliferation                                      | 4/60 | 438/23328 | 0.0262 | 0.0515 | 4 |
| BP | GO:0045860 | positive regulation of protein<br>kinase activity                  | 4/60 | 440/23328 | 0.0266 | 0.0520 | 4 |
| BP | GO:0071900 | regulation of protein<br>serine/threonine kinase activity          | 4/60 | 442/23328 | 0.0270 | 0.0525 | 4 |
| BP | GO:0042391 | regulation of membrane<br>potential                                | 4/60 | 450/23328 | 0.0286 | 0.0535 | 4 |
| BP | GO:0045786 | negative regulation of cell cycle                                  | 4/60 | 451/23328 | 0.0288 | 0.0538 | 4 |
| BP | GO:0070838 | divalent metal ion transport                                       | 4/60 | 467/23328 | 0.0321 | 0.0553 | 4 |
| BP | GO:0009306 | protein secretion                                                  | 4/60 | 470/23328 | 0.0327 | 0.0553 | 4 |
| BP | GO:0072511 | divalent inorganic cation<br>transport                             | 4/60 | 470/23328 | 0.0327 | 0.0553 | 4 |

|    |            |                                                                                                                               |      |           |        |        |   |
|----|------------|-------------------------------------------------------------------------------------------------------------------------------|------|-----------|--------|--------|---|
| BP | GO:0035592 | establishment of protein localization to extracellular region                                                                 | 4/60 | 471/23328 | 0.0330 | 0.0553 | 4 |
| BP | GO:0031346 | positive regulation of cell projection organization                                                                           | 4/60 | 478/23328 | 0.0345 | 0.0566 | 4 |
| BP | GO:0071692 | protein localization to extracellular region                                                                                  | 4/60 | 478/23328 | 0.0345 | 0.0566 | 4 |
| BP | GO:0034765 | regulation of ion transmembrane transport                                                                                     | 4/60 | 489/23328 | 0.0370 | 0.0583 | 4 |
| CC | GO:0005901 | caveola                                                                                                                       | 4/61 | 97/23271  | 0.0001 | 0.0040 | 4 |
| CC | GO:0044853 | plasma membrane raft                                                                                                          | 4/61 | 130/23271 | 0.0004 | 0.0095 | 4 |
| CC | GO:0031253 | cell projection membrane                                                                                                      | 4/61 | 304/23271 | 0.0083 | 0.0566 | 4 |
| CC | GO:0045121 | membrane raft                                                                                                                 | 4/61 | 379/23271 | 0.0174 | 0.0842 | 4 |
| CC | GO:0098857 | membrane microdomain                                                                                                          | 4/61 | 380/23271 | 0.0176 | 0.0842 | 4 |
| CC | GO:0098589 | membrane region                                                                                                               | 4/61 | 393/23271 | 0.0196 | 0.0866 | 4 |
| MF | GO:0016702 | oxidoreductase activity, acting on single donors with incorporation of molecular oxygen, incorporation of two atoms of oxygen | 4/58 | 28/22669  | 0.0000 | 0.0001 | 4 |
| MF | GO:0016701 | oxidoreductase activity, acting on single donors with incorporation of molecular oxygen                                       | 4/58 | 29/22669  | 0.0000 | 0.0001 | 4 |
| MF | GO:0051213 | dioxygenase activity                                                                                                          | 4/58 | 92/22669  | 0.0001 | 0.0044 | 4 |
| MF | GO:0005319 | lipid transporter activity                                                                                                    | 4/58 | 138/22669 | 0.0004 | 0.0103 | 4 |
| MF | GO:0016874 | ligase activity                                                                                                               | 4/58 | 163/22669 | 0.0008 | 0.0132 | 4 |
| MF | GO:0005506 | iron ion binding                                                                                                              | 4/58 | 167/22669 | 0.0009 | 0.0132 | 4 |
| MF | GO:0031406 | carboxylic acid binding                                                                                                       | 4/58 | 226/22669 | 0.0027 | 0.0166 | 4 |
| MF | GO:0043177 | organic acid binding                                                                                                          | 4/58 | 241/22669 | 0.0034 | 0.0197 | 4 |
| MF | GO:0061629 | RNA polymerase II-specific DNA-binding transcription factor binding                                                           | 4/58 | 284/22669 | 0.0060 | 0.0311 | 4 |
| MF | GO:0042277 | peptide binding                                                                                                               | 4/58 | 318/22669 | 0.0089 | 0.0373 | 4 |
| MF | GO:0001227 | DNA-binding transcription repressor activity, RNA polymerase II-specific                                                      | 4/58 | 344/22669 | 0.0116 | 0.0435 | 4 |
| MF | GO:0001217 | DNA-binding transcription repressor activity                                                                                  | 4/58 | 345/22669 | 0.0117 | 0.0435 | 4 |
| MF | GO:0140297 | DNA-binding transcription factor binding                                                                                      | 4/58 | 365/22669 | 0.0142 | 0.0506 | 4 |
| BP | GO:0006750 | glutathione biosynthetic process                                                                                              | 3/60 | 12/23328  | 0.0000 | 0.0001 | 3 |



|    |            |                                                                                   |      |          |        |        |   |
|----|------------|-----------------------------------------------------------------------------------|------|----------|--------|--------|---|
| BP | GO:0001781 | neutrophil apoptotic process                                                      | 3/60 | 13/23328 | 0.0000 | 0.0002 | 3 |
| BP | GO:0019184 | nonribosomal peptide biosynthetic process                                         | 3/60 | 14/23328 | 0.0000 | 0.0002 | 3 |
| BP | GO:0072350 | tricarboxylic acid metabolic process                                              | 3/60 | 15/23328 | 0.0000 | 0.0002 | 3 |
| BP | GO:0090594 | inflammatory response to wounding                                                 | 3/60 | 15/23328 | 0.0000 | 0.0002 | 3 |
| BP | GO:0032495 | response to muramyl dipeptide                                                     | 3/60 | 20/23328 | 0.0000 | 0.0004 | 3 |
| BP | GO:0010039 | response to iron ion                                                              | 3/60 | 21/23328 | 0.0000 | 0.0004 | 3 |
| BP | GO:0034114 | regulation of heterotypic cell-cell adhesion                                      | 3/60 | 25/23328 | 0.0000 | 0.0006 | 3 |
| BP | GO:0001780 | neutrophil homeostasis                                                            | 3/60 | 26/23328 | 0.0000 | 0.0007 | 3 |
| BP | GO:0010575 | positive regulation of vascular endothelial growth factor production              | 3/60 | 26/23328 | 0.0000 | 0.0007 | 3 |
| BP | GO:0006925 | inflammatory cell apoptotic process                                               | 3/60 | 27/23328 | 0.0000 | 0.0007 | 3 |
| BP | GO:0042908 | xenobiotic transport                                                              | 3/60 | 27/23328 | 0.0000 | 0.0007 | 3 |
| BP | GO:0006536 | glutamate metabolic process                                                       | 3/60 | 28/23328 | 0.0001 | 0.0008 | 3 |
| BP | GO:0006099 | tricarboxylic acid cycle                                                          | 3/60 | 32/23328 | 0.0001 | 0.0009 | 3 |
| BP | GO:0010574 | regulation of vascular endothelial growth factor production                       | 3/60 | 32/23328 | 0.0001 | 0.0009 | 3 |
| BP | GO:0120255 | olefinic compound biosynthetic process                                            | 3/60 | 34/23328 | 0.0001 | 0.0011 | 3 |
| BP | GO:0010573 | vascular endothelial growth factor production                                     | 3/60 | 36/23328 | 0.0001 | 0.0012 | 3 |
| BP | GO:0001782 | B cell homeostasis                                                                | 3/60 | 37/23328 | 0.0001 | 0.0013 | 3 |
| BP | GO:0033028 | myeloid cell apoptotic process                                                    | 3/60 | 39/23328 | 0.0001 | 0.0014 | 3 |
| BP | GO:0042398 | cellular modified amino acid biosynthetic process                                 | 3/60 | 39/23328 | 0.0001 | 0.0014 | 3 |
| BP | GO:0042304 | regulation of fatty acid biosynthetic process                                     | 3/60 | 43/23328 | 0.0002 | 0.0018 | 3 |
| BP | GO:0089718 | amino acid import across plasma membrane                                          | 3/60 | 45/23328 | 0.0002 | 0.0020 | 3 |
| BP | GO:0006636 | unsaturated fatty acid biosynthetic process                                       | 3/60 | 46/23328 | 0.0002 | 0.0020 | 3 |
| BP | GO:0043618 | regulation of transcription from RNA polymerase II promoter in response to stress | 3/60 | 46/23328 | 0.0002 | 0.0020 | 3 |
| BP | GO:0006110 | regulation of glycolytic process                                                  | 3/60 | 48/23328 | 0.0003 | 0.0022 | 3 |
| BP | GO:0043090 | amino acid import                                                                 | 3/60 | 49/23328 | 0.0003 | 0.0023 | 3 |

|    |            |                                                                                |      |          |        |          |
|----|------------|--------------------------------------------------------------------------------|------|----------|--------|----------|
|    |            | regulation of extrinsic apoptotic signaling pathway via death domain receptors |      |          |        |          |
| BP | GO:1902041 |                                                                                | 3/60 | 49/23328 | 0.0003 | 0.0023 3 |
|    |            | L-alpha-amino acid transmembrane transport                                     |      |          |        |          |
| BP | GO:1902475 |                                                                                | 3/60 | 50/23328 | 0.0003 | 0.0024 3 |
|    |            | negative regulation of oxidative stress-induced cell death                     |      |          |        |          |
| BP | GO:1903202 |                                                                                | 3/60 | 52/23328 | 0.0003 | 0.0027 3 |
|    |            | regulation of gluconeogenesis                                                  |      |          |        |          |
| BP | GO:0006111 |                                                                                | 3/60 | 53/23328 | 0.0003 | 0.0028 3 |
|    |            | negative regulation of cellular response to oxidative stress                   |      |          |        |          |
| BP | GO:1900408 |                                                                                | 3/60 | 53/23328 | 0.0003 | 0.0028 3 |
|    |            | heterotypic cell-cell adhesion                                                 |      |          |        |          |
| BP | GO:0034113 |                                                                                | 3/60 | 54/23328 | 0.0004 | 0.0029 3 |
|    |            | negative regulation of response to oxidative stress                            |      |          |        |          |
| BP | GO:1902883 |                                                                                | 3/60 | 56/23328 | 0.0004 | 0.0032 3 |
|    |            | export across plasma membrane                                                  |      |          |        |          |
| BP | GO:0140115 |                                                                                | 3/60 | 57/23328 | 0.0004 | 0.0033 3 |
|    |            | regulation of carbohydrate catabolic process                                   |      |          |        |          |
| BP | GO:0043470 |                                                                                | 3/60 | 58/23328 | 0.0005 | 0.0034 3 |
|    |            | glutamine family amino acid metabolic process                                  |      |          |        |          |
| BP | GO:0009064 |                                                                                | 3/60 | 64/23328 | 0.0006 | 0.0042 3 |
|    |            | L-amino acid transport                                                         |      |          |        |          |
| BP | GO:0015807 |                                                                                | 3/60 | 65/23328 | 0.0006 | 0.0043 3 |
|    |            | fatty acid derivative biosynthetic process                                     |      |          |        |          |
| BP | GO:1901570 |                                                                                | 3/60 | 67/23328 | 0.0007 | 0.0045 3 |
|    |            | autophagy of mitochondrion                                                     |      |          |        |          |
| BP | GO:0000422 |                                                                                | 3/60 | 68/23328 | 0.0007 | 0.0046 3 |
|    |            | endoplasmic reticulum unfolded protein response                                |      |          |        |          |
| BP | GO:0030968 |                                                                                | 3/60 | 68/23328 | 0.0007 | 0.0046 3 |
|    |            | mitochondrion disassembly                                                      |      |          |        |          |
| BP | GO:0061726 |                                                                                | 3/60 | 68/23328 | 0.0007 | 0.0046 3 |
|    |            | arachidonic acid metabolic process                                             |      |          |        |          |
| BP | GO:0019369 |                                                                                | 3/60 | 70/23328 | 0.0008 | 0.0049 3 |
|    |            | negative regulation of autophagy                                               |      |          |        |          |
| BP | GO:0010507 |                                                                                | 3/60 | 75/23328 | 0.0010 | 0.0056 3 |
|    |            | regulation of protein import into nucleus                                      |      |          |        |          |
| BP | GO:0042306 |                                                                                | 3/60 | 75/23328 | 0.0010 | 0.0056 3 |
|    |            | negative regulation of protein ubiquitination                                  |      |          |        |          |
| BP | GO:0031397 |                                                                                | 3/60 | 77/23328 | 0.0010 | 0.0058 3 |
|    |            | regulation of oxidative stress-induced cell death                              |      |          |        |          |
| BP | GO:1903201 |                                                                                | 3/60 | 77/23328 | 0.0010 | 0.0058 3 |
|    |            | extrinsic apoptotic signaling pathway via death domain receptors               |      |          |        |          |
| BP | GO:0008625 |                                                                                | 3/60 | 78/23328 | 0.0011 | 0.0058 3 |
|    |            | regulation of interleukin-1 beta production                                    |      |          |        |          |
| BP | GO:0032651 |                                                                                | 3/60 | 80/23328 | 0.0012 | 0.0061 3 |
|    |            | regulation of purine nucleotide metabolic process                              |      |          |        |          |
| BP | GO:1900542 |                                                                                | 3/60 | 80/23328 | 0.0012 | 0.0061 3 |

|    |            |                                                         |      |           |        |        |   |
|----|------------|---------------------------------------------------------|------|-----------|--------|--------|---|
| BP | GO:0006140 | regulation of nucleotide metabolic process              | 3/60 | 81/23328  | 0.0012 | 0.0062 | 3 |
| BP | GO:1904589 | regulation of protein import                            | 3/60 | 81/23328  | 0.0012 | 0.0062 | 3 |
| BP | GO:0015914 | phospholipid transport                                  | 3/60 | 82/23328  | 0.0012 | 0.0064 | 3 |
| BP | GO:0003333 | amino acid transmembrane transport                      | 3/60 | 83/23328  | 0.0013 | 0.0065 | 3 |
| BP | GO:1901379 | regulation of potassium ion transmembrane transport     | 3/60 | 86/23328  | 0.0014 | 0.0070 | 3 |
| BP | GO:0034620 | cellular response to unfolded protein                   | 3/60 | 88/23328  | 0.0015 | 0.0073 | 3 |
| BP | GO:0070301 | cellular response to hydrogen peroxide                  | 3/60 | 89/23328  | 0.0016 | 0.0075 | 3 |
| BP | GO:0032611 | interleukin-1 beta production                           | 3/60 | 91/23328  | 0.0017 | 0.0078 | 3 |
| BP | GO:1900407 | regulation of cellular response to oxidative stress     | 3/60 | 91/23328  | 0.0017 | 0.0078 | 3 |
| BP | GO:0006096 | glycolytic process                                      | 3/60 | 92/23328  | 0.0017 | 0.0080 | 3 |
| BP | GO:0006757 | ATP generation from ADP                                 | 3/60 | 93/23328  | 0.0018 | 0.0082 | 3 |
| BP | GO:0015908 | fatty acid transport                                    | 3/60 | 94/23328  | 0.0018 | 0.0084 | 3 |
| BP | GO:1903578 | regulation of ATP metabolic process                     | 3/60 | 96/23328  | 0.0020 | 0.0087 | 3 |
| BP | GO:0032652 | regulation of interleukin-1 production                  | 3/60 | 98/23328  | 0.0021 | 0.0088 | 3 |
| BP | GO:0036473 | cell death in response to oxidative stress              | 3/60 | 98/23328  | 0.0021 | 0.0088 | 3 |
| BP | GO:1903008 | organelle disassembly                                   | 3/60 | 98/23328  | 0.0021 | 0.0088 | 3 |
| BP | GO:0046031 | ADP metabolic process                                   | 3/60 | 99/23328  | 0.0021 | 0.0090 | 3 |
| BP | GO:0062014 | negative regulation of small molecule metabolic process | 3/60 | 99/23328  | 0.0021 | 0.0090 | 3 |
| BP | GO:0046889 | positive regulation of lipid biosynthetic process       | 3/60 | 100/23328 | 0.0022 | 0.0092 | 3 |
| BP | GO:1902882 | regulation of response to oxidative stress              | 3/60 | 100/23328 | 0.0022 | 0.0092 | 3 |
| BP | GO:0015748 | organophosphate ester transport                         | 3/60 | 103/23328 | 0.0024 | 0.0098 | 3 |
| BP | GO:0009135 | purine nucleoside diphosphate metabolic process         | 3/60 | 104/23328 | 0.0024 | 0.0100 | 3 |
| BP | GO:0009179 | purine ribonucleoside diphosphate metabolic process     | 3/60 | 104/23328 | 0.0024 | 0.0100 | 3 |
| BP | GO:1905954 | positive regulation of lipid localization               | 3/60 | 105/23328 | 0.0025 | 0.0102 | 3 |
| BP | GO:0000041 | transition metal ion transport                          | 3/60 | 106/23328 | 0.0026 | 0.0103 | 3 |
| BP | GO:0006165 | nucleoside diphosphate phosphorylation                  | 3/60 | 106/23328 | 0.0026 | 0.0103 | 3 |

|    |            |                                                                       |      |           |        |        |   |
|----|------------|-----------------------------------------------------------------------|------|-----------|--------|--------|---|
| BP | GO:0009185 | ribonucleoside diphosphate<br>metabolic process                       | 3/60 | 108/23328 | 0.0027 | 0.0106 | 3 |
| BP | GO:0043255 | regulation of carbohydrate<br>biosynthetic process                    | 3/60 | 108/23328 | 0.0027 | 0.0106 | 3 |
| BP | GO:0043266 | regulation of potassium ion<br>transport                              | 3/60 | 108/23328 | 0.0027 | 0.0106 | 3 |
| BP | GO:0046939 | nucleotide phosphorylation                                            | 3/60 | 108/23328 | 0.0027 | 0.0106 | 3 |
| BP | GO:0002526 | acute inflammatory response                                           | 3/60 | 110/23328 | 0.0029 | 0.0109 | 3 |
| BP | GO:0032612 | interleukin-1 production                                              | 3/60 | 110/23328 | 0.0029 | 0.0109 | 3 |
| BP | GO:0035967 | cellular response to<br>topologically incorrect protein               | 3/60 | 110/23328 | 0.0029 | 0.0109 | 3 |
| BP | GO:2000106 | regulation of leukocyte<br>apoptotic process                          | 3/60 | 110/23328 | 0.0029 | 0.0109 | 3 |
| BP | GO:0008630 | intrinsic apoptotic signaling<br>pathway in response to DNA<br>damage | 3/60 | 111/23328 | 0.0029 | 0.0111 | 3 |
| BP | GO:1904659 | glucose transmembrane<br>transport                                    | 3/60 | 111/23328 | 0.0029 | 0.0111 | 3 |
| BP | GO:0008645 | hexose transmembrane transport                                        | 3/60 | 112/23328 | 0.0030 | 0.0113 | 3 |
| BP | GO:0015749 | monosaccharide transmembrane<br>transport                             | 3/60 | 114/23328 | 0.0032 | 0.0117 | 3 |
| BP | GO:0034219 | carbohydrate transmembrane<br>transport                               | 3/60 | 115/23328 | 0.0033 | 0.0119 | 3 |
| BP | GO:0006090 | pyruvate metabolic process                                            | 3/60 | 120/23328 | 0.0037 | 0.0130 | 3 |
| BP | GO:0033559 | unsaturated fatty acid metabolic<br>process                           | 3/60 | 120/23328 | 0.0037 | 0.0130 | 3 |
| BP | GO:0002688 | regulation of leukocyte<br>chemotaxis                                 | 3/60 | 121/23328 | 0.0038 | 0.0132 | 3 |
| BP | GO:0009132 | nucleoside diphosphate<br>metabolic process                           | 3/60 | 123/23328 | 0.0039 | 0.0137 | 3 |
| BP | GO:1903409 | reactive oxygen species<br>biosynthetic process                       | 3/60 | 125/23328 | 0.0041 | 0.0142 | 3 |
| BP | GO:0046822 | regulation of nucleocytoplasmic<br>transport                          | 3/60 | 126/23328 | 0.0042 | 0.0145 | 3 |
| BP | GO:0010906 | regulation of glucose metabolic<br>process                            | 3/60 | 128/23328 | 0.0044 | 0.0151 | 3 |
| BP | GO:0006690 | icosanoid metabolic process                                           | 3/60 | 129/23328 | 0.0045 | 0.0153 | 3 |
| BP | GO:0033138 | positive regulation of peptidyl-<br>serine phosphorylation            | 3/60 | 129/23328 | 0.0045 | 0.0153 | 3 |
| BP | GO:0032368 | regulation of lipid transport                                         | 3/60 | 130/23328 | 0.0046 | 0.0155 | 3 |
| BP | GO:0048640 | negative regulation of<br>developmental growth                        | 3/60 | 131/23328 | 0.0047 | 0.0157 | 3 |

|    |            |                                                                   |      |           |        |        |   |
|----|------------|-------------------------------------------------------------------|------|-----------|--------|--------|---|
| BP | GO:0045995 | regulation of embryonic development                               | 3/60 | 134/23328 | 0.0050 | 0.0165 | 3 |
| BP | GO:0043467 | regulation of generation of precursor metabolites and energy      | 3/60 | 135/23328 | 0.0051 | 0.0167 | 3 |
| BP | GO:1900180 | regulation of protein localization to nucleus                     | 3/60 | 139/23328 | 0.0055 | 0.0177 | 3 |
| BP | GO:0016052 | carbohydrate catabolic process                                    | 3/60 | 142/23328 | 0.0059 | 0.0185 | 3 |
| BP | GO:0035270 | endocrine system development                                      | 3/60 | 147/23328 | 0.0065 | 0.0199 | 3 |
| BP | GO:0034101 | erythrocyte homeostasis                                           | 3/60 | 149/23328 | 0.0067 | 0.0204 | 3 |
| BP | GO:0034614 | cellular response to reactive oxygen species                      | 3/60 | 150/23328 | 0.0068 | 0.0206 | 3 |
| BP | GO:0050729 | positive regulation of inflammatory response                      | 3/60 | 152/23328 | 0.0071 | 0.0211 | 3 |
| BP | GO:0002821 | positive regulation of adaptive immune response                   | 3/60 | 154/23328 | 0.0073 | 0.0216 | 3 |
| BP | GO:0006457 | protein folding                                                   | 3/60 | 155/23328 | 0.0075 | 0.0218 | 3 |
| BP | GO:0034250 | positive regulation of cellular amide metabolic process           | 3/60 | 158/23328 | 0.0079 | 0.0227 | 3 |
| BP | GO:0050777 | negative regulation of immune response                            | 3/60 | 158/23328 | 0.0079 | 0.0227 | 3 |
| BP | GO:0002700 | regulation of production of molecular mediator of immune response | 3/60 | 159/23328 | 0.0080 | 0.0228 | 3 |
| BP | GO:0009266 | response to temperature stimulus                                  | 3/60 | 159/23328 | 0.0080 | 0.0228 | 3 |
| BP | GO:0045580 | regulation of T cell differentiation                              | 3/60 | 159/23328 | 0.0080 | 0.0228 | 3 |
| BP | GO:0006694 | steroid biosynthetic process                                      | 3/60 | 161/23328 | 0.0083 | 0.0233 | 3 |
| BP | GO:0006865 | amino acid transport                                              | 3/60 | 162/23328 | 0.0084 | 0.0237 | 3 |
| BP | GO:0045017 | glycerolipid biosynthetic process                                 | 3/60 | 164/23328 | 0.0087 | 0.0242 | 3 |
| BP | GO:0006606 | protein import into nucleus                                       | 3/60 | 165/23328 | 0.0089 | 0.0242 | 3 |
| BP | GO:0051147 | regulation of muscle cell differentiation                         | 3/60 | 165/23328 | 0.0089 | 0.0242 | 3 |
| BP | GO:0007596 | blood coagulation                                                 | 3/60 | 166/23328 | 0.0090 | 0.0245 | 3 |
| BP | GO:0045834 | positive regulation of lipid metabolic process                    | 3/60 | 167/23328 | 0.0091 | 0.0246 | 3 |
| BP | GO:0007599 | hemostasis                                                        | 3/60 | 168/23328 | 0.0093 | 0.0248 | 3 |
| BP | GO:0050817 | coagulation                                                       | 3/60 | 169/23328 | 0.0094 | 0.0250 | 3 |
| BP | GO:0051170 | import into nucleus                                               | 3/60 | 169/23328 | 0.0094 | 0.0250 | 3 |

|    |            |                                                                                                                                         |      |           |        |        |   |
|----|------------|-----------------------------------------------------------------------------------------------------------------------------------------|------|-----------|--------|--------|---|
| BP | GO:0071356 | cellular response to tumor necrosis factor                                                                                              | 3/60 | 169/23328 | 0.0094 | 0.0250 | 3 |
| BP | GO:0008654 | phospholipid biosynthetic process                                                                                                       | 3/60 | 172/23328 | 0.0099 | 0.0258 | 3 |
| BP | GO:0007033 | vacuole organization                                                                                                                    | 3/60 | 174/23328 | 0.0102 | 0.0266 | 3 |
| BP | GO:0015718 | monocarboxylic acid transport                                                                                                           | 3/60 | 174/23328 | 0.0102 | 0.0266 | 3 |
| BP | GO:0007369 | gastrulation                                                                                                                            | 3/60 | 176/23328 | 0.0105 | 0.0272 | 3 |
| BP | GO:0032388 | positive regulation of intracellular transport                                                                                          | 3/60 | 184/23328 | 0.0119 | 0.0299 | 3 |
| BP | GO:0034612 | response to tumor necrosis factor                                                                                                       | 3/60 | 188/23328 | 0.0126 | 0.0311 | 3 |
| BP | GO:0002695 | negative regulation of leukocyte activation                                                                                             | 3/60 | 189/23328 | 0.0128 | 0.0315 | 3 |
| BP | GO:0007259 | receptor signaling pathway via JAK-STAT                                                                                                 | 3/60 | 191/23328 | 0.0131 | 0.0321 | 3 |
| BP | GO:0045619 | regulation of lymphocyte differentiation                                                                                                | 3/60 | 192/23328 | 0.0133 | 0.0323 | 3 |
| BP | GO:1903531 | negative regulation of secretion by cell                                                                                                | 3/60 | 193/23328 | 0.0135 | 0.0327 | 3 |
| BP | GO:0048771 | tissue remodeling                                                                                                                       | 3/60 | 196/23328 | 0.0141 | 0.0333 | 3 |
| BP | GO:0097696 | receptor signaling pathway via STAT                                                                                                     | 3/60 | 196/23328 | 0.0141 | 0.0333 | 3 |
| BP | GO:0002822 | regulation of adaptive immune response based on somatic recombination of immune receptors built from immunoglobulin superfamily domains | 3/60 | 197/23328 | 0.0143 | 0.0337 | 3 |
| BP | GO:0050714 | positive regulation of protein secretion                                                                                                | 3/60 | 199/23328 | 0.0147 | 0.0341 | 3 |
| BP | GO:0051216 | cartilage development                                                                                                                   | 3/60 | 200/23328 | 0.0149 | 0.0344 | 3 |
| BP | GO:0071805 | potassium ion transmembrane transport                                                                                                   | 3/60 | 200/23328 | 0.0149 | 0.0344 | 3 |
| BP | GO:0002285 | lymphocyte activation involved in immune response                                                                                       | 3/60 | 203/23328 | 0.0154 | 0.0355 | 3 |
| BP | GO:0050679 | positive regulation of epithelial cell proliferation                                                                                    | 3/60 | 208/23328 | 0.0165 | 0.0375 | 3 |
| BP | GO:0002685 | regulation of leukocyte migration                                                                                                       | 3/60 | 217/23328 | 0.0184 | 0.0409 | 3 |
| BP | GO:0017038 | protein import                                                                                                                          | 3/60 | 217/23328 | 0.0184 | 0.0409 | 3 |
| BP | GO:0044242 | cellular lipid catabolic process                                                                                                        | 3/60 | 219/23328 | 0.0189 | 0.0416 | 3 |
| BP | GO:0016054 | organic acid catabolic process                                                                                                          | 3/60 | 223/23328 | 0.0198 | 0.0432 | 3 |

|    |            |                                                                                        |      |           |        |        |   |
|----|------------|----------------------------------------------------------------------------------------|------|-----------|--------|--------|---|
| BP | GO:0046395 | carboxylic acid catabolic process                                                      | 3/60 | 223/23328 | 0.0198 | 0.0432 | 3 |
| BP | GO:0051048 | negative regulation of secretion                                                       | 3/60 | 223/23328 | 0.0198 | 0.0432 | 3 |
| BP | GO:0002793 | positive regulation of peptide secretion                                               | 3/60 | 230/23328 | 0.0214 | 0.0460 | 3 |
| BP | GO:0033157 | regulation of intracellular protein transport                                          | 3/60 | 232/23328 | 0.0219 | 0.0465 | 3 |
| BP | GO:0051607 | defense response to virus                                                              | 3/60 | 239/23328 | 0.0237 | 0.0495 | 3 |
| BP | GO:0006813 | potassium ion transport                                                                | 3/60 | 240/23328 | 0.0239 | 0.0499 | 3 |
| BP | GO:0030278 | regulation of ossification                                                             | 3/60 | 241/23328 | 0.0242 | 0.0503 | 3 |
| BP | GO:0032147 | activation of protein kinase activity                                                  | 3/60 | 242/23328 | 0.0245 | 0.0503 | 3 |
| BP | GO:0090092 | regulation of transmembrane receptor protein serine/threonine kinase signaling pathway | 3/60 | 247/23328 | 0.0258 | 0.0509 | 3 |
| BP | GO:1903522 | regulation of blood circulation                                                        | 3/60 | 248/23328 | 0.0261 | 0.0513 | 3 |
| BP | GO:0030258 | lipid modification                                                                     | 3/60 | 250/23328 | 0.0266 | 0.0520 | 3 |
| BP | GO:0046034 | ATP metabolic process                                                                  | 3/60 | 253/23328 | 0.0274 | 0.0526 | 3 |
| BP | GO:0071375 | cellular response to peptide hormone stimulus                                          | 3/60 | 253/23328 | 0.0274 | 0.0526 | 3 |
| BP | GO:0051403 | stress-activated MAPK cascade                                                          | 3/60 | 257/23328 | 0.0285 | 0.0535 | 3 |
| BP | GO:0001894 | tissue homeostasis                                                                     | 3/60 | 261/23328 | 0.0297 | 0.0541 | 3 |
| BP | GO:0002703 | regulation of leukocyte mediated immunity                                              | 3/60 | 261/23328 | 0.0297 | 0.0541 | 3 |
| BP | GO:0050730 | regulation of peptidyl-tyrosine phosphorylation                                        | 3/60 | 263/23328 | 0.0303 | 0.0541 | 3 |
| BP | GO:0048588 | developmental cell growth                                                              | 3/60 | 267/23328 | 0.0314 | 0.0553 | 3 |
| BP | GO:0031098 | stress-activated protein kinase signaling cascade                                      | 3/60 | 272/23328 | 0.0330 | 0.0553 | 3 |
| BP | GO:0042593 | glucose homeostasis                                                                    | 3/60 | 273/23328 | 0.0333 | 0.0554 | 3 |
| BP | GO:0071695 | anatomical structure maturation                                                        | 3/60 | 273/23328 | 0.0333 | 0.0554 | 3 |
| BP | GO:0110053 | regulation of actin filament organization                                              | 3/60 | 273/23328 | 0.0333 | 0.0554 | 3 |
| BP | GO:0033500 | carbohydrate homeostasis                                                               | 3/60 | 274/23328 | 0.0336 | 0.0558 | 3 |
| BP | GO:0061448 | connective tissue development                                                          | 3/60 | 276/23328 | 0.0342 | 0.0566 | 3 |
| BP | GO:0030336 | negative regulation of cell migration                                                  | 3/60 | 278/23328 | 0.0348 | 0.0566 | 3 |
| BP | GO:0031349 | positive regulation of defense response                                                | 3/60 | 278/23328 | 0.0348 | 0.0566 | 3 |
| BP | GO:0090287 | regulation of cellular response to growth factor stimulus                              | 3/60 | 281/23328 | 0.0358 | 0.0571 | 3 |

|    |            |                                                      |      |           |        |        |   |
|----|------------|------------------------------------------------------|------|-----------|--------|--------|---|
| BP | GO:0030217 | T cell differentiation                               | 3/60 | 282/23328 | 0.0361 | 0.0574 | 3 |
| BP | GO:0007162 | negative regulation of cell adhesion                 | 3/60 | 290/23328 | 0.0387 | 0.0594 | 3 |
| BP | GO:2000146 | negative regulation of cell motility                 | 3/60 | 291/23328 | 0.0390 | 0.0594 | 3 |
| BP | GO:0034504 | protein localization to nucleus                      | 3/60 | 293/23328 | 0.0397 | 0.0594 | 3 |
| BP | GO:0071214 | cellular response to abiotic stimulus                | 3/60 | 294/23328 | 0.0401 | 0.0594 | 3 |
| BP | GO:0104004 | cellular response to environmental stimulus          | 3/60 | 294/23328 | 0.0401 | 0.0594 | 3 |
| BP | GO:0043405 | regulation of MAP kinase activity                    | 3/60 | 301/23328 | 0.0425 | 0.0609 | 3 |
| BP | GO:0006913 | nucleocytoplasmic transport                          | 3/60 | 308/23328 | 0.0449 | 0.0625 | 3 |
| BP | GO:0051169 | nuclear transport                                    | 3/60 | 308/23328 | 0.0449 | 0.0625 | 3 |
| BP | GO:0016032 | viral process                                        | 3/60 | 309/23328 | 0.0453 | 0.0625 | 3 |
| BP | GO:1902105 | regulation of leukocyte differentiation              | 3/60 | 309/23328 | 0.0453 | 0.0625 | 3 |
| BP | GO:0008544 | epidermis development                                | 3/60 | 313/23328 | 0.0468 | 0.0639 | 3 |
| BP | GO:1903829 | positive regulation of cellular protein localization | 3/60 | 317/23328 | 0.0482 | 0.0644 | 3 |
| BP | GO:0018108 | peptidyl-tyrosine phosphorylation                    | 3/60 | 322/23328 | 0.0501 | 0.0657 | 3 |
| BP | GO:0018212 | peptidyl-tyrosine modification                       | 3/60 | 325/23328 | 0.0513 | 0.0669 | 3 |
| BP | GO:0040013 | negative regulation of locomotion                    | 3/60 | 326/23328 | 0.0516 | 0.0671 | 3 |
| BP | GO:0051271 | negative regulation of cellular component movement   | 3/60 | 326/23328 | 0.0516 | 0.0671 | 3 |
| BP | GO:0021700 | developmental maturation                             | 3/60 | 327/23328 | 0.0520 | 0.0671 | 3 |
| BP | GO:0050768 | negative regulation of neurogenesis                  | 3/60 | 337/23328 | 0.0560 | 0.0693 | 3 |
| BP | GO:0042063 | gliogenesis                                          | 3/60 | 338/23328 | 0.0564 | 0.0696 | 3 |
| BP | GO:0045862 | positive regulation of proteolysis                   | 3/60 | 344/23328 | 0.0588 | 0.0714 | 3 |
| BP | GO:0046486 | glycerolipid metabolic process                       | 3/60 | 360/23328 | 0.0655 | 0.0757 | 3 |
| BP | GO:0002440 | production of molecular mediator of immune response  | 3/60 | 361/23328 | 0.0660 | 0.0760 | 3 |
| BP | GO:0032956 | regulation of actin cytoskeleton organization        | 3/60 | 361/23328 | 0.0660 | 0.0760 | 3 |
| BP | GO:0048167 | regulation of synaptic plasticity                    | 3/60 | 365/23328 | 0.0677 | 0.0764 | 3 |
| BP | GO:0051961 | negative regulation of nervous system development    | 3/60 | 365/23328 | 0.0677 | 0.0764 | 3 |
| BP | GO:0043010 | camera-type eye development                          | 3/60 | 370/23328 | 0.0699 | 0.0777 | 3 |



|    |            |                                                                                          |      |           |        |        |   |
|----|------------|------------------------------------------------------------------------------------------|------|-----------|--------|--------|---|
| BP | GO:0006644 | phospholipid metabolic process                                                           | 3/60 | 374/23328 | 0.0717 | 0.0785 | 3 |
| BP | GO:0051656 | establishment of organelle localization                                                  | 3/60 | 382/23328 | 0.0753 | 0.0806 | 3 |
| BP | GO:1903532 | positive regulation of secretion by cell                                                 | 3/60 | 388/23328 | 0.0781 | 0.0820 | 3 |
| BP | GO:0044270 | cellular nitrogen compound catabolic process                                             | 3/60 | 391/23328 | 0.0795 | 0.0823 | 3 |
| BP | GO:0030900 | forebrain development                                                                    | 3/60 | 393/23328 | 0.0805 | 0.0832 | 3 |
| BP | GO:0046700 | heterocycle catabolic process                                                            | 3/60 | 397/23328 | 0.0824 | 0.0843 | 3 |
| BP | GO:0042692 | muscle cell differentiation                                                              | 3/60 | 399/23328 | 0.0834 | 0.0848 | 3 |
| BP | GO:0043161 | proteasome-mediated ubiquitin-dependent protein catabolic process                        | 3/60 | 405/23328 | 0.0863 | 0.0855 | 3 |
| BP | GO:0048638 | regulation of developmental growth                                                       | 3/60 | 409/23328 | 0.0882 | 0.0871 | 3 |
| BP | GO:0010256 | endomembrane system organization                                                         | 3/60 | 410/23328 | 0.0887 | 0.0871 | 3 |
| BP | GO:0032970 | regulation of actin filament-based process                                               | 3/60 | 410/23328 | 0.0887 | 0.0871 | 3 |
| BP | GO:0019439 | aromatic compound catabolic process                                                      | 3/60 | 411/23328 | 0.0892 | 0.0875 | 3 |
| BP | GO:0001654 | eye development                                                                          | 3/60 | 418/23328 | 0.0927 | 0.0894 | 3 |
| BP | GO:0006816 | calcium ion transport                                                                    | 3/60 | 420/23328 | 0.0937 | 0.0897 | 3 |
| BP | GO:0150063 | visual system development                                                                | 3/60 | 422/23328 | 0.0947 | 0.0905 | 3 |
| BP | GO:0048880 | sensory system development                                                               | 3/60 | 426/23328 | 0.0968 | 0.0915 | 3 |
| BP | GO:0007015 | actin filament organization                                                              | 3/60 | 437/23328 | 0.1025 | 0.0944 | 3 |
| BP | GO:0043254 | regulation of protein-containing complex assembly                                        | 3/60 | 438/23328 | 0.1030 | 0.0948 | 3 |
| BP | GO:0051047 | positive regulation of secretion adaptive immune response based on somatic recombination | 3/60 | 440/23328 | 0.1041 | 0.0954 | 3 |
| BP | GO:0002460 | of immune receptors built from immunoglobulin superfamily domains                        | 3/60 | 445/23328 | 0.1067 | 0.0964 | 3 |
| BP | GO:0010498 | proteasomal protein catabolic process                                                    | 3/60 | 470/23328 | 0.1204 | 0.1042 | 3 |
| BP | GO:0048608 | reproductive structure development                                                       | 3/60 | 477/23328 | 0.1244 | 0.1061 | 3 |
| BP | GO:0002696 | positive regulation of leukocyte activation                                              | 3/60 | 479/23328 | 0.1255 | 0.1062 | 3 |
| BP | GO:0061458 | reproductive system development                                                          | 3/60 | 481/23328 | 0.1267 | 0.1070 | 3 |

|    |            |                                                     |      |           |        |        |   |
|----|------------|-----------------------------------------------------|------|-----------|--------|--------|---|
| BP | GO:0015672 | monovalent inorganic cation transport               | 3/60 | 489/23328 | 0.1313 | 0.1088 | 3 |
| BP | GO:0050867 | positive regulation of cell activation              | 3/60 | 496/23328 | 0.1353 | 0.1106 | 3 |
| CC | GO:0000407 | phagophore assembly site                            | 3/61 | 29/23271  | 0.0001 | 0.0026 | 3 |
| CC | GO:0030018 | Z disc                                              | 3/61 | 125/23271 | 0.0043 | 0.0482 | 3 |
| CC | GO:0031674 | I band                                              | 3/61 | 138/23271 | 0.0057 | 0.0510 | 3 |
| CC | GO:0005777 | peroxisome                                          | 3/61 | 145/23271 | 0.0065 | 0.0510 | 3 |
| CC | GO:0042579 | microbody                                           | 3/61 | 145/23271 | 0.0065 | 0.0510 | 3 |
| CC | GO:0030496 | midbody                                             | 3/61 | 147/23271 | 0.0068 | 0.0510 | 3 |
| CC | GO:0030017 | sarcomere                                           | 3/61 | 188/23271 | 0.0133 | 0.0817 | 3 |
| CC | GO:0019867 | outer membrane                                      | 3/61 | 196/23271 | 0.0148 | 0.0834 | 3 |
| CC | GO:0031968 | organelle outer membrane                            | 3/61 | 196/23271 | 0.0148 | 0.0834 | 3 |
| CC | GO:0030016 | myofibril                                           | 3/61 | 212/23271 | 0.0182 | 0.0842 | 3 |
| CC | GO:0043292 | contractile fiber                                   | 3/61 | 226/23271 | 0.0215 | 0.0899 | 3 |
| CC | GO:0008021 | synaptic vesicle                                    | 3/61 | 239/23271 | 0.0249 | 0.0959 | 3 |
| CC | GO:0070382 | exocytic vesicle                                    | 3/61 | 261/23271 | 0.0312 | 0.0961 | 3 |
| CC | GO:0019898 | extrinsic component of membrane                     | 3/61 | 320/23271 | 0.0517 | 0.1286 | 3 |
| CC | GO:0030133 | transport vesicle                                   | 3/61 | 339/23271 | 0.0594 | 0.1296 | 3 |
| CC | GO:0031252 | cell leading edge                                   | 3/61 | 395/23271 | 0.0851 | 0.1537 | 3 |
| CC | GO:0043235 | receptor complex                                    | 3/61 | 403/23271 | 0.0891 | 0.1537 | 3 |
| CC | GO:0097060 | synaptic membrane                                   | 3/61 | 470/23271 | 0.1255 | 0.1847 | 3 |
| CC | GO:0015629 | actin cytoskeleton                                  | 3/61 | 497/23271 | 0.1416 | 0.2036 | 3 |
| MF | GO:0042910 | xenobiotic transmembrane transporter activity       | 3/58 | 26/22669  | 0.0000 | 0.0025 | 3 |
| MF | GO:0043130 | ubiquitin binding                                   | 3/58 | 75/22669  | 0.0009 | 0.0132 | 3 |
| MF | GO:0032182 | ubiquitin-like protein binding                      | 3/58 | 95/22669  | 0.0019 | 0.0133 | 3 |
| MF | GO:0031072 | heat shock protein binding                          | 3/58 | 146/22669 | 0.0062 | 0.0311 | 3 |
| MF | GO:0019887 | protein kinase regulator activity                   | 3/58 | 170/22669 | 0.0095 | 0.0387 | 3 |
| MF | GO:0019207 | kinase regulator activity                           | 3/58 | 202/22669 | 0.0150 | 0.0518 | 3 |
| MF | GO:0005125 | cytokine activity                                   | 3/58 | 231/22669 | 0.0214 | 0.0675 | 3 |
| MF | GO:0016746 | transferase activity, transferring acyl groups      | 3/58 | 268/22669 | 0.0313 | 0.0763 | 3 |
| MF | GO:0005126 | cytokine receptor binding                           | 3/58 | 314/22669 | 0.0465 | 0.0869 | 3 |
| BP | GO:0015911 | long-chain fatty acid import across plasma membrane | 2/60 | 10/23328  | 0.0003 | 0.0024 | 2 |
| BP | GO:0033029 | regulation of neutrophil apoptotic process          | 2/60 | 10/23328  | 0.0003 | 0.0024 | 2 |
| BP | GO:0019372 | lipxygenase pathway                                 | 2/60 | 11/23328  | 0.0004 | 0.0028 | 2 |

|    |            |                                                                                             |      |          |        |        |   |
|----|------------|---------------------------------------------------------------------------------------------|------|----------|--------|--------|---|
| BP | GO:0043619 | regulation of transcription from RNA polymerase II promoter in response to oxidative stress | 2/60 | 11/23328 | 0.0004 | 0.0028 | 2 |
| BP | GO:0097421 | liver regeneration                                                                          | 2/60 | 12/23328 | 0.0004 | 0.0033 | 2 |
| BP | GO:0070431 | nucleotide-binding oligomerization domain containing 2 signaling pathway                    | 2/60 | 13/23328 | 0.0005 | 0.0036 | 2 |
| BP | GO:0071281 | cellular response to iron ion                                                               | 2/60 | 13/23328 | 0.0005 | 0.0036 | 2 |
| BP | GO:0006857 | oligopeptide transport                                                                      | 2/60 | 14/23328 | 0.0006 | 0.0041 | 2 |
| BP | GO:0034116 | positive regulation of heterotypic cell-cell adhesion                                       | 2/60 | 14/23328 | 0.0006 | 0.0041 | 2 |
| BP | GO:0070423 | nucleotide-binding oligomerization domain containing signaling pathway                      | 2/60 | 14/23328 | 0.0006 | 0.0041 | 2 |
| BP | GO:1902001 | fatty acid transmembrane transport                                                          | 2/60 | 14/23328 | 0.0006 | 0.0041 | 2 |
| BP | GO:0010715 | regulation of extracellular matrix disassembly                                              | 2/60 | 15/23328 | 0.0007 | 0.0044 | 2 |
| BP | GO:0035872 | nucleotide-binding domain, leucine rich repeat containing receptor signaling pathway        | 2/60 | 15/23328 | 0.0007 | 0.0044 | 2 |
| BP | GO:0044068 | modulation by symbiont of host cellular process                                             | 2/60 | 16/23328 | 0.0008 | 0.0048 | 2 |
| BP | GO:0002689 | negative regulation of leukocyte chemotaxis                                                 | 2/60 | 17/23328 | 0.0009 | 0.0051 | 2 |
| BP | GO:0034755 | iron ion transmembrane transport                                                            | 2/60 | 17/23328 | 0.0009 | 0.0051 | 2 |
| BP | GO:0035729 | cellular response to hepatocyte growth factor stimulus                                      | 2/60 | 17/23328 | 0.0009 | 0.0051 | 2 |
| BP | GO:1902176 | negative regulation of oxidative stress-induced intrinsic apoptotic signaling pathway       | 2/60 | 17/23328 | 0.0009 | 0.0051 | 2 |
| BP | GO:0032740 | positive regulation of interleukin-17 production                                            | 2/60 | 18/23328 | 0.0010 | 0.0056 | 2 |
| BP | GO:0045779 | negative regulation of bone resorption                                                      | 2/60 | 18/23328 | 0.0010 | 0.0056 | 2 |
| BP | GO:0035728 | response to hepatocyte growth factor                                                        | 2/60 | 19/23328 | 0.0011 | 0.0058 | 2 |
| BP | GO:0044539 | long-chain fatty acid import into cell                                                      | 2/60 | 19/23328 | 0.0011 | 0.0058 | 2 |
| BP | GO:0045540 | regulation of cholesterol biosynthetic process                                              | 2/60 | 19/23328 | 0.0011 | 0.0058 | 2 |

|    |            |                                                                                                                                       |      |          |        |        |   |
|----|------------|---------------------------------------------------------------------------------------------------------------------------------------|------|----------|--------|--------|---|
| BP | GO:0060099 | regulation of phagocytosis,<br>engulfment                                                                                             | 2/60 | 19/23328 | 0.0011 | 0.0058 | 2 |
| BP | GO:0106118 | regulation of sterol biosynthetic<br>process                                                                                          | 2/60 | 19/23328 | 0.0011 | 0.0058 | 2 |
| BP | GO:0140354 | lipid import into cell                                                                                                                | 2/60 | 19/23328 | 0.0011 | 0.0058 | 2 |
| BP | GO:0045722 | positive regulation of<br>gluconeogenesis                                                                                             | 2/60 | 20/23328 | 0.0012 | 0.0062 | 2 |
| BP | GO:0046851 | negative regulation of bone<br>remodeling                                                                                             | 2/60 | 20/23328 | 0.0012 | 0.0062 | 2 |
| BP | GO:1905153 | regulation of membrane<br>invagination                                                                                                | 2/60 | 20/23328 | 0.0012 | 0.0062 | 2 |
| BP | GO:0035357 | peroxisome proliferator<br>activated receptor signaling<br>pathway                                                                    | 2/60 | 21/23328 | 0.0013 | 0.0066 | 2 |
| BP | GO:0042759 | long-chain fatty acid<br>biosynthetic process                                                                                         | 2/60 | 21/23328 | 0.0013 | 0.0066 | 2 |
| BP | GO:0046716 | muscle cell cellular homeostasis                                                                                                      | 2/60 | 21/23328 | 0.0013 | 0.0066 | 2 |
| BP | GO:0051900 | regulation of mitochondrial<br>depolarization                                                                                         | 2/60 | 21/23328 | 0.0013 | 0.0066 | 2 |
| BP | GO:0090050 | positive regulation of cell<br>migration involved in sprouting<br>angiogenesis                                                        | 2/60 | 21/23328 | 0.0013 | 0.0066 | 2 |
| BP | GO:0043651 | linoleic acid metabolic process                                                                                                       | 2/60 | 22/23328 | 0.0015 | 0.0070 | 2 |
| BP | GO:0098780 | response to mitochondrial<br>depolarisation                                                                                           | 2/60 | 22/23328 | 0.0015 | 0.0070 | 2 |
| BP | GO:1901522 | positive regulation of<br>transcription from RNA<br>polymerase II promoter                                                            | 2/60 | 22/23328 | 0.0015 | 0.0070 | 2 |
| BP | GO:1904996 | involved in cellular response to<br>chemical stimulus<br>positive regulation of leukocyte<br>adhesion to vascular endothelial<br>cell | 2/60 | 22/23328 | 0.0015 | 0.0070 | 2 |
| BP | GO:0002313 | mature B cell differentiation<br>involved in immune response                                                                          | 2/60 | 23/23328 | 0.0016 | 0.0075 | 2 |
| BP | GO:0036003 | positive regulation of<br>transcription from RNA<br>polymerase II promoter in<br>response to stress                                   | 2/60 | 23/23328 | 0.0016 | 0.0075 | 2 |
| BP | GO:0071276 | cellular response to cadmium<br>ion                                                                                                   | 2/60 | 23/23328 | 0.0016 | 0.0075 | 2 |
| BP | GO:0051882 | mitochondrial depolarization                                                                                                          | 2/60 | 24/23328 | 0.0017 | 0.0080 | 2 |

|    |            |                                                                              |      |          |        |        |   |
|----|------------|------------------------------------------------------------------------------|------|----------|--------|--------|---|
| BP | GO:0070498 | interleukin-1-mediated signaling pathway                                     | 2/60 | 24/23328 | 0.0017 | 0.0080 | 2 |
| BP | GO:1903204 | negative regulation of oxidative stress-induced neuron death                 | 2/60 | 24/23328 | 0.0017 | 0.0080 | 2 |
| BP | GO:0000423 | mitophagy                                                                    | 2/60 | 25/23328 | 0.0019 | 0.0084 | 2 |
| BP | GO:0006706 | steroid catabolic process                                                    | 2/60 | 25/23328 | 0.0019 | 0.0084 | 2 |
| BP | GO:0032703 | negative regulation of interleukin-2 production                              | 2/60 | 25/23328 | 0.0019 | 0.0084 | 2 |
| BP | GO:0044003 | modulation by symbiont of host process                                       | 2/60 | 25/23328 | 0.0019 | 0.0084 | 2 |
| BP | GO:0046685 | response to arsenic-containing substance                                     | 2/60 | 25/23328 | 0.0019 | 0.0084 | 2 |
| BP | GO:0031100 | animal organ regeneration                                                    | 2/60 | 26/23328 | 0.0020 | 0.0088 | 2 |
| BP | GO:0034104 | negative regulation of tissue remodeling                                     | 2/60 | 26/23328 | 0.0020 | 0.0088 | 2 |
| BP | GO:0045723 | positive regulation of fatty acid biosynthetic process                       | 2/60 | 26/23328 | 0.0020 | 0.0088 | 2 |
| BP | GO:0072337 | modified amino acid transport                                                | 2/60 | 26/23328 | 0.0020 | 0.0088 | 2 |
| BP | GO:1902175 | regulation of oxidative stress-induced intrinsic apoptotic signaling pathway | 2/60 | 26/23328 | 0.0020 | 0.0088 | 2 |
| BP | GO:2000637 | positive regulation of gene silencing by miRNA                               | 2/60 | 26/23328 | 0.0020 | 0.0088 | 2 |
| BP | GO:0060148 | positive regulation of posttranscriptional gene silencing                    | 2/60 | 27/23328 | 0.0022 | 0.0092 | 2 |
| BP | GO:1904994 | regulation of leukocyte adhesion to vascular endothelial cell                | 2/60 | 27/23328 | 0.0022 | 0.0092 | 2 |
| BP | GO:0090025 | regulation of monocyte chemotaxis                                            | 2/60 | 28/23328 | 0.0024 | 0.0097 | 2 |
| BP | GO:1900273 | positive regulation of long-term synaptic potentiation                       | 2/60 | 28/23328 | 0.0024 | 0.0097 | 2 |
| BP | GO:0035094 | response to nicotine                                                         | 2/60 | 29/23328 | 0.0025 | 0.0102 | 2 |
| BP | GO:0002335 | mature B cell differentiation                                                | 2/60 | 30/23328 | 0.0027 | 0.0106 | 2 |
| BP | GO:0032373 | positive regulation of sterol transport                                      | 2/60 | 31/23328 | 0.0029 | 0.0109 | 2 |
| BP | GO:0032376 | positive regulation of cholesterol transport                                 | 2/60 | 31/23328 | 0.0029 | 0.0109 | 2 |
| BP | GO:0072574 | hepatocyte proliferation                                                     | 2/60 | 31/23328 | 0.0029 | 0.0109 | 2 |
| BP | GO:0072575 | epithelial cell proliferation involved in liver morphogenesis                | 2/60 | 31/23328 | 0.0029 | 0.0109 | 2 |

|    |            |                                                                                         |      |          |        |        |   |
|----|------------|-----------------------------------------------------------------------------------------|------|----------|--------|--------|---|
| BP | GO:1902042 | negative regulation of extrinsic apoptotic signaling pathway via death domain receptors | 2/60 | 31/23328 | 0.0029 | 0.0109 | 2 |
| BP | GO:0071354 | cellular response to interleukin-6                                                      | 2/60 | 32/23328 | 0.0031 | 0.0114 | 2 |
| BP | GO:0022617 | extracellular matrix disassembly                                                        | 2/60 | 33/23328 | 0.0033 | 0.0119 | 2 |
| BP | GO:0032891 | negative regulation of organic acid transport                                           | 2/60 | 33/23328 | 0.0033 | 0.0119 | 2 |
| BP | GO:0072576 | liver morphogenesis                                                                     | 2/60 | 33/23328 | 0.0033 | 0.0119 | 2 |
| BP | GO:0033032 | regulation of myeloid cell apoptotic process                                            | 2/60 | 34/23328 | 0.0035 | 0.0124 | 2 |
| BP | GO:0051180 | vitamin transport                                                                       | 2/60 | 34/23328 | 0.0035 | 0.0124 | 2 |
| BP | GO:0070741 | response to interleukin-6                                                               | 2/60 | 34/23328 | 0.0035 | 0.0124 | 2 |
| BP | GO:0071634 | regulation of transforming growth factor beta production                                | 2/60 | 34/23328 | 0.0035 | 0.0124 | 2 |
| BP | GO:0090181 | regulation of cholesterol metabolic process                                             | 2/60 | 34/23328 | 0.0035 | 0.0124 | 2 |
| BP | GO:0032660 | regulation of interleukin-17 production                                                 | 2/60 | 35/23328 | 0.0037 | 0.0130 | 2 |
| BP | GO:0046686 | response to cadmium ion                                                                 | 2/60 | 35/23328 | 0.0037 | 0.0130 | 2 |
| BP | GO:1903203 | regulation of oxidative stress-induced neuron death                                     | 2/60 | 35/23328 | 0.0037 | 0.0130 | 2 |
| BP | GO:0036475 | neuron death in response to oxidative stress                                            | 2/60 | 36/23328 | 0.0039 | 0.0136 | 2 |
| BP | GO:0071604 | transforming growth factor beta production                                              | 2/60 | 36/23328 | 0.0039 | 0.0136 | 2 |
| BP | GO:0002675 | positive regulation of acute inflammatory response                                      | 2/60 | 37/23328 | 0.0041 | 0.0142 | 2 |
| BP | GO:0014823 | response to activity                                                                    | 2/60 | 37/23328 | 0.0041 | 0.0142 | 2 |
| BP | GO:0050892 | intestinal absorption                                                                   | 2/60 | 39/23328 | 0.0045 | 0.0153 | 2 |
| BP | GO:0090049 | regulation of cell migration involved in sprouting angiogenesis                         | 2/60 | 39/23328 | 0.0045 | 0.0153 | 2 |
| BP | GO:1905710 | positive regulation of membrane permeability                                            | 2/60 | 39/23328 | 0.0045 | 0.0153 | 2 |
| BP | GO:0006984 | ER-nucleus signaling pathway                                                            | 2/60 | 40/23328 | 0.0048 | 0.0159 | 2 |
| BP | GO:0015804 | neutral amino acid transport                                                            | 2/60 | 40/23328 | 0.0048 | 0.0159 | 2 |
| BP | GO:0002686 | negative regulation of leukocyte migration                                              | 2/60 | 41/23328 | 0.0050 | 0.0165 | 2 |
| BP | GO:0006953 | acute-phase response                                                                    | 2/60 | 41/23328 | 0.0050 | 0.0165 | 2 |
| BP | GO:0010470 | regulation of gastrulation                                                              | 2/60 | 41/23328 | 0.0050 | 0.0165 | 2 |
| BP | GO:0072348 | sulfur compound transport                                                               | 2/60 | 42/23328 | 0.0052 | 0.0171 | 2 |

|    |            |                                                                                       |      |          |        |         |
|----|------------|---------------------------------------------------------------------------------------|------|----------|--------|---------|
| BP | GO:0002753 | cytoplasmic pattern recognition receptor signaling pathway                            | 2/60 | 43/23328 | 0.0055 | 0.01762 |
| BP | GO:0032007 | negative regulation of TOR signaling                                                  | 2/60 | 43/23328 | 0.0055 | 0.01762 |
| BP | GO:0032620 | interleukin-17 production                                                             | 2/60 | 43/23328 | 0.0055 | 0.01762 |
| BP | GO:0042771 | intrinsic apoptotic signaling pathway in response to DNA damage by p53 class mediator | 2/60 | 43/23328 | 0.0055 | 0.01762 |
| BP | GO:1903053 | regulation of extracellular matrix organization                                       | 2/60 | 43/23328 | 0.0055 | 0.01762 |
| BP | GO:1903792 | negative regulation of anion transport                                                | 2/60 | 43/23328 | 0.0055 | 0.01762 |
| BP | GO:0008631 | intrinsic apoptotic signaling pathway in response to oxidative stress                 | 2/60 | 44/23328 | 0.0057 | 0.01812 |
| BP | GO:0034198 | cellular response to amino acid starvation                                            | 2/60 | 44/23328 | 0.0057 | 0.01812 |
| BP | GO:0071385 | cellular response to glucocorticoid stimulus                                          | 2/60 | 44/23328 | 0.0057 | 0.01812 |
| BP | GO:1902895 | positive regulation of pri-miRNA transcription by RNA polymerase II                   | 2/60 | 44/23328 | 0.0057 | 0.01812 |
| BP | GO:1903672 | positive regulation of sprouting angiogenesis                                         | 2/60 | 44/23328 | 0.0057 | 0.01812 |
| BP | GO:0010907 | positive regulation of glucose metabolic process                                      | 2/60 | 45/23328 | 0.0060 | 0.01872 |
| BP | GO:0042149 | cellular response to glucose starvation                                               | 2/60 | 45/23328 | 0.0060 | 0.01872 |
| BP | GO:0045923 | positive regulation of fatty acid metabolic process                                   | 2/60 | 45/23328 | 0.0060 | 0.01872 |
| BP | GO:0061756 | leukocyte adhesion to vascular endothelial cell                                       | 2/60 | 45/23328 | 0.0060 | 0.01872 |
| BP | GO:0003254 | regulation of membrane depolarization                                                 | 2/60 | 46/23328 | 0.0063 | 0.01942 |
| BP | GO:0071384 | cellular response to corticosteroid stimulus                                          | 2/60 | 46/23328 | 0.0063 | 0.01942 |
| BP | GO:0045332 | phospholipid translocation                                                            | 2/60 | 47/23328 | 0.0065 | 0.01992 |
| BP | GO:0060964 | regulation of gene silencing by miRNA                                                 | 2/60 | 47/23328 | 0.0065 | 0.01992 |
| BP | GO:0072666 | establishment of protein localization to vacuole                                      | 2/60 | 47/23328 | 0.0065 | 0.01992 |
| BP | GO:0038066 | p38MAPK cascade                                                                       | 2/60 | 48/23328 | 0.0068 | 0.02062 |

|    |            |                                                                |      |          |        |        |   |
|----|------------|----------------------------------------------------------------|------|----------|--------|--------|---|
| BP | GO:0045429 | positive regulation of nitric oxide biosynthetic process       | 2/60 | 48/23328 | 0.0068 | 0.0206 | 2 |
|    |            | vascular endothelial growth                                    |      |          |        |        |   |
| BP | GO:0048010 | factor receptor signaling pathway                              | 2/60 | 48/23328 | 0.0068 | 0.0206 | 2 |
| BP | GO:1990928 | response to amino acid starvation                              | 2/60 | 48/23328 | 0.0068 | 0.0206 | 2 |
| BP | GO:0006695 | cholesterol biosynthetic process                               | 2/60 | 49/23328 | 0.0071 | 0.0211 | 2 |
| BP | GO:0034204 | lipid translocation                                            | 2/60 | 49/23328 | 0.0071 | 0.0211 | 2 |
| BP | GO:1902653 | secondary alcohol biosynthetic process                         | 2/60 | 49/23328 | 0.0071 | 0.0211 | 2 |
| BP | GO:1904407 | positive regulation of nitric oxide metabolic process          | 2/60 | 49/23328 | 0.0071 | 0.0211 | 2 |
| BP | GO:0010677 | negative regulation of cellular carbohydrate metabolic process | 2/60 | 50/23328 | 0.0074 | 0.0216 | 2 |
| BP | GO:0045646 | regulation of erythrocyte differentiation                      | 2/60 | 50/23328 | 0.0074 | 0.0216 | 2 |
| BP | GO:0060147 | regulation of posttranscriptional gene silencing               | 2/60 | 50/23328 | 0.0074 | 0.0216 | 2 |
| BP | GO:0060966 | regulation of gene silencing by RNA                            | 2/60 | 50/23328 | 0.0074 | 0.0216 | 2 |
| BP | GO:0070229 | negative regulation of lymphocyte apoptotic process            | 2/60 | 50/23328 | 0.0074 | 0.0216 | 2 |
| BP | GO:0098754 | detoxification                                                 | 2/60 | 51/23328 | 0.0076 | 0.0223 | 2 |
| BP | GO:0032731 | positive regulation of interleukin-1 beta production           | 2/60 | 52/23328 | 0.0079 | 0.0227 | 2 |
| BP | GO:0032757 | positive regulation of interleukin-8 production                | 2/60 | 52/23328 | 0.0079 | 0.0227 | 2 |
| BP | GO:0042307 | positive regulation of protein import into nucleus             | 2/60 | 52/23328 | 0.0079 | 0.0227 | 2 |
| BP | GO:0045124 | regulation of bone resorption                                  | 2/60 | 52/23328 | 0.0079 | 0.0227 | 2 |
| BP | GO:1904036 | negative regulation of epithelial cell apoptotic process       | 2/60 | 52/23328 | 0.0079 | 0.0227 | 2 |
| BP | GO:0032371 | regulation of sterol transport                                 | 2/60 | 53/23328 | 0.0082 | 0.0233 | 2 |
| BP | GO:0032374 | regulation of cholesterol transport                            | 2/60 | 53/23328 | 0.0082 | 0.0233 | 2 |
| BP | GO:0048662 | negative regulation of smooth muscle cell proliferation        | 2/60 | 53/23328 | 0.0082 | 0.0233 | 2 |
| BP | GO:0046456 | icosanoid biosynthetic process                                 | 2/60 | 54/23328 | 0.0085 | 0.0238 | 2 |
| BP | GO:0061077 | chaperone-mediated protein folding                             | 2/60 | 54/23328 | 0.0085 | 0.0238 | 2 |



|    |            |                                                                  |      |          |        |        |   |
|----|------------|------------------------------------------------------------------|------|----------|--------|--------|---|
| BP | GO:1900271 | regulation of long-term synaptic potentiation                    | 2/60 | 54/23328 | 0.0085 | 0.0238 | 2 |
| BP | GO:1902930 | regulation of alcohol biosynthetic process                       | 2/60 | 54/23328 | 0.0085 | 0.0238 | 2 |
| BP | GO:0002042 | cell migration involved in sprouting angiogenesis                | 2/60 | 55/23328 | 0.0089 | 0.0242 | 2 |
| BP | GO:0002673 | regulation of acute inflammatory response                        | 2/60 | 55/23328 | 0.0089 | 0.0242 | 2 |
| BP | GO:0006826 | iron ion transport                                               | 2/60 | 55/23328 | 0.0089 | 0.0242 | 2 |
| BP | GO:0016126 | sterol biosynthetic process                                      | 2/60 | 55/23328 | 0.0089 | 0.0242 | 2 |
| BP | GO:0045912 | negative regulation of carbohydrate metabolic process            | 2/60 | 55/23328 | 0.0089 | 0.0242 | 2 |
| BP | GO:0050922 | negative regulation of chemotaxis                                | 2/60 | 55/23328 | 0.0089 | 0.0242 | 2 |
| BP | GO:0097035 | regulation of membrane lipid distribution                        | 2/60 | 55/23328 | 0.0089 | 0.0242 | 2 |
| BP | GO:2000351 | regulation of endothelial cell apoptotic process                 | 2/60 | 55/23328 | 0.0089 | 0.0242 | 2 |
| BP | GO:0035924 | cellular response to vascular endothelial growth factor stimulus | 2/60 | 56/23328 | 0.0092 | 0.0246 | 2 |
| BP | GO:0042446 | hormone biosynthetic process                                     | 2/60 | 56/23328 | 0.0092 | 0.0246 | 2 |
| BP | GO:0045599 | negative regulation of fat cell differentiation                  | 2/60 | 56/23328 | 0.0092 | 0.0246 | 2 |
| BP | GO:0071675 | regulation of mononuclear cell migration                         | 2/60 | 56/23328 | 0.0092 | 0.0246 | 2 |
| BP | GO:0071715 | icosanoid transport                                              | 2/60 | 56/23328 | 0.0092 | 0.0246 | 2 |
| BP | GO:1901571 | fatty acid derivative transport                                  | 2/60 | 56/23328 | 0.0092 | 0.0246 | 2 |
| BP | GO:1902893 | regulation of pri-miRNA transcription by RNA polymerase II       | 2/60 | 56/23328 | 0.0092 | 0.0246 | 2 |
| BP | GO:0002548 | monocyte chemotaxis                                              | 2/60 | 57/23328 | 0.0095 | 0.0250 | 2 |
| BP | GO:0051591 | response to cAMP                                                 | 2/60 | 57/23328 | 0.0095 | 0.0250 | 2 |
| BP | GO:0032663 | regulation of interleukin-2 production                           | 2/60 | 58/23328 | 0.0098 | 0.0256 | 2 |
| BP | GO:0061614 | pri-miRNA transcription by RNA polymerase II                     | 2/60 | 58/23328 | 0.0098 | 0.0256 | 2 |
| BP | GO:0072577 | endothelial cell apoptotic process                               | 2/60 | 58/23328 | 0.0098 | 0.0256 | 2 |
| BP | GO:1904591 | positive regulation of protein import                            | 2/60 | 58/23328 | 0.0098 | 0.0256 | 2 |
| BP | GO:0007595 | lactation                                                        | 2/60 | 60/23328 | 0.0105 | 0.0270 | 2 |

|    |            |                                                                     |      |          |        |        |   |
|----|------------|---------------------------------------------------------------------|------|----------|--------|--------|---|
| BP | GO:0090303 | positive regulation of wound healing                                | 2/60 | 60/23328 | 0.0105 | 0.0270 | 2 |
| BP | GO:0032732 | positive regulation of interleukin-1 production                     | 2/60 | 61/23328 | 0.0108 | 0.0277 | 2 |
| BP | GO:0061912 | selective autophagy                                                 | 2/60 | 61/23328 | 0.0108 | 0.0277 | 2 |
| BP | GO:0019080 | viral gene expression                                               | 2/60 | 62/23328 | 0.0111 | 0.0282 | 2 |
| BP | GO:0031018 | endocrine pancreas development                                      | 2/60 | 62/23328 | 0.0111 | 0.0282 | 2 |
| BP | GO:0032387 | negative regulation of intracellular transport                      | 2/60 | 62/23328 | 0.0111 | 0.0282 | 2 |
| BP | GO:0046850 | regulation of bone remodeling                                       | 2/60 | 62/23328 | 0.0111 | 0.0282 | 2 |
| BP | GO:0072665 | protein localization to vacuole                                     | 2/60 | 62/23328 | 0.0111 | 0.0282 | 2 |
| BP | GO:0098930 | axonal transport                                                    | 2/60 | 62/23328 | 0.0111 | 0.0282 | 2 |
| BP | GO:1903428 | positive regulation of reactive oxygen species biosynthetic process | 2/60 | 63/23328 | 0.0115 | 0.0290 | 2 |
| BP | GO:0015909 | long-chain fatty acid transport                                     | 2/60 | 64/23328 | 0.0118 | 0.0299 | 2 |
| BP | GO:0045454 | cell redox homeostasis                                              | 2/60 | 65/23328 | 0.0122 | 0.0305 | 2 |
| BP | GO:2000514 | regulation of CD4-positive, alpha-beta T cell activation            | 2/60 | 65/23328 | 0.0122 | 0.0305 | 2 |
| BP | GO:0032623 | interleukin-2 production                                            | 2/60 | 66/23328 | 0.0126 | 0.0311 | 2 |
| BP | GO:0042440 | pigment metabolic process                                           | 2/60 | 66/23328 | 0.0126 | 0.0311 | 2 |
| BP | GO:0090559 | regulation of membrane permeability                                 | 2/60 | 66/23328 | 0.0126 | 0.0311 | 2 |
| BP | GO:0097006 | regulation of plasma lipoprotein particle levels                    | 2/60 | 66/23328 | 0.0126 | 0.0311 | 2 |
| BP | GO:0000768 | syncytium formation by plasma membrane fusion                       | 2/60 | 67/23328 | 0.0129 | 0.0317 | 2 |
| BP | GO:0010676 | positive regulation of cellular carbohydrate metabolic process      | 2/60 | 67/23328 | 0.0129 | 0.0317 | 2 |
| BP | GO:0140253 | cell-cell fusion                                                    | 2/60 | 67/23328 | 0.0129 | 0.0317 | 2 |
| BP | GO:2000378 | negative regulation of reactive oxygen species metabolic process    | 2/60 | 68/23328 | 0.0133 | 0.0323 | 2 |
| BP | GO:0006949 | syncytium formation                                                 | 2/60 | 69/23328 | 0.0137 | 0.0327 | 2 |
| BP | GO:0008542 | visual learning                                                     | 2/60 | 69/23328 | 0.0137 | 0.0327 | 2 |
| BP | GO:0016239 | positive regulation of macroautophagy                               | 2/60 | 69/23328 | 0.0137 | 0.0327 | 2 |
| BP | GO:0032677 | regulation of interleukin-8 production                              | 2/60 | 69/23328 | 0.0137 | 0.0327 | 2 |
| BP | GO:0045428 | regulation of nitric oxide biosynthetic process                     | 2/60 | 69/23328 | 0.0137 | 0.0327 | 2 |

|    |            |                                                             |      |          |        |        |   |
|----|------------|-------------------------------------------------------------|------|----------|--------|--------|---|
| BP | GO:0045600 | positive regulation of fat cell differentiation             | 2/60 | 69/23328 | 0.0137 | 0.0327 | 2 |
| BP | GO:1990868 | response to chemokine                                       | 2/60 | 70/23328 | 0.0140 | 0.0333 | 2 |
| BP | GO:1990869 | cellular response to chemokine                              | 2/60 | 70/23328 | 0.0140 | 0.0333 | 2 |
| BP | GO:2000107 | negative regulation of leukocyte apoptotic process          | 2/60 | 70/23328 | 0.0140 | 0.0333 | 2 |
| BP | GO:0007040 | lysosome organization                                       | 2/60 | 71/23328 | 0.0144 | 0.0337 | 2 |
|    |            | regulation of tyrosine phosphorylation of STAT protein      |      |          |        |        |   |
| BP | GO:0042509 | phosphorylation of STAT protein                             | 2/60 | 71/23328 | 0.0144 | 0.0337 | 2 |
| BP | GO:0055081 | anion homeostasis                                           | 2/60 | 71/23328 | 0.0144 | 0.0337 | 2 |
| BP | GO:0080171 | lytic vacuole organization                                  | 2/60 | 71/23328 | 0.0144 | 0.0337 | 2 |
| BP | GO:0007632 | visual behavior                                             | 2/60 | 73/23328 | 0.0152 | 0.0351 | 2 |
| BP | GO:0046824 | positive regulation of nucleocytoplasmic transport          | 2/60 | 74/23328 | 0.0156 | 0.0358 | 2 |
| BP | GO:0007260 | tyrosine phosphorylation of STAT protein                    | 2/60 | 75/23328 | 0.0160 | 0.0365 | 2 |
| BP | GO:0032637 | interleukin-8 production                                    | 2/60 | 75/23328 | 0.0160 | 0.0365 | 2 |
| BP | GO:1903670 | regulation of sprouting angiogenesis                        | 2/60 | 75/23328 | 0.0160 | 0.0365 | 2 |
| BP | GO:0006809 | nitric oxide biosynthetic process                           | 2/60 | 77/23328 | 0.0168 | 0.0382 | 2 |
| BP | GO:0045453 | bone resorption                                             | 2/60 | 77/23328 | 0.0168 | 0.0382 | 2 |
| BP | GO:0002066 | columnar/cuboidal epithelial cell development               | 2/60 | 78/23328 | 0.0172 | 0.0387 | 2 |
| BP | GO:0019229 | regulation of vasoconstriction                              | 2/60 | 78/23328 | 0.0172 | 0.0387 | 2 |
| BP | GO:0050810 | regulation of steroid biosynthetic process                  | 2/60 | 78/23328 | 0.0172 | 0.0387 | 2 |
| BP | GO:0070228 | regulation of lymphocyte apoptotic process                  | 2/60 | 78/23328 | 0.0172 | 0.0387 | 2 |
| BP | GO:0070373 | negative regulation of ERK1 and ERK2 cascade                | 2/60 | 78/23328 | 0.0172 | 0.0387 | 2 |
| BP | GO:0072332 | intrinsic apoptotic signaling pathway by p53 class mediator | 2/60 | 78/23328 | 0.0172 | 0.0387 | 2 |
| BP | GO:1903036 | positive regulation of response to wounding                 | 2/60 | 78/23328 | 0.0172 | 0.0387 | 2 |
| BP | GO:0002637 | regulation of immunoglobulin production                     | 2/60 | 79/23328 | 0.0177 | 0.0394 | 2 |
| BP | GO:0048635 | negative regulation of muscle organ development             | 2/60 | 79/23328 | 0.0177 | 0.0394 | 2 |
| BP | GO:0008088 | axo-dendritic transport                                     | 2/60 | 80/23328 | 0.0181 | 0.0403 | 2 |
| BP | GO:0060968 | regulation of gene silencing                                | 2/60 | 80/23328 | 0.0181 | 0.0403 | 2 |
| BP | GO:0046209 | nitric oxide metabolic process                              | 2/60 | 81/23328 | 0.0185 | 0.0409 | 2 |

|    |            |                                                                                  |      |          |        |        |   |
|----|------------|----------------------------------------------------------------------------------|------|----------|--------|--------|---|
| BP | GO:0051881 | regulation of mitochondrial membrane potential                                   | 2/60 | 81/23328 | 0.0185 | 0.0409 | 2 |
| BP | GO:0071347 | cellular response to interleukin-1                                               | 2/60 | 81/23328 | 0.0185 | 0.0409 | 2 |
| BP | GO:0030500 | regulation of bone mineralization                                                | 2/60 | 82/23328 | 0.0189 | 0.0416 | 2 |
| BP | GO:0032370 | positive regulation of lipid transport                                           | 2/60 | 82/23328 | 0.0189 | 0.0416 | 2 |
| BP | GO:0046323 | glucose import                                                                   | 2/60 | 83/23328 | 0.0194 | 0.0425 | 2 |
| BP | GO:0051899 | membrane depolarization                                                          | 2/60 | 83/23328 | 0.0194 | 0.0425 | 2 |
| BP | GO:0051817 | modulation of process of other organism involved in symbiotic interaction        | 2/60 | 84/23328 | 0.0198 | 0.0432 | 2 |
| BP | GO:0002718 | regulation of cytokine production involved in immune response                    | 2/60 | 85/23328 | 0.0203 | 0.0440 | 2 |
| BP | GO:0030301 | cholesterol transport                                                            | 2/60 | 85/23328 | 0.0203 | 0.0440 | 2 |
| BP | GO:0015918 | sterol transport                                                                 | 2/60 | 86/23328 | 0.0207 | 0.0446 | 2 |
| BP | GO:0031646 | positive regulation of nervous system process                                    | 2/60 | 86/23328 | 0.0207 | 0.0446 | 2 |
| BP | GO:2001057 | reactive nitrogen species metabolic process                                      | 2/60 | 86/23328 | 0.0207 | 0.0446 | 2 |
| BP | GO:0034103 | regulation of tissue remodeling                                                  | 2/60 | 87/23328 | 0.0212 | 0.0455 | 2 |
| BP | GO:0002312 | B cell activation involved in immune response                                    | 2/60 | 88/23328 | 0.0216 | 0.0460 | 2 |
| BP | GO:0032436 | positive regulation of proteasomal ubiquitin-dependent protein catabolic process | 2/60 | 88/23328 | 0.0216 | 0.0460 | 2 |
| BP | GO:0045913 | positive regulation of carbohydrate metabolic process                            | 2/60 | 88/23328 | 0.0216 | 0.0460 | 2 |
| BP | GO:0046683 | response to organophosphorus                                                     | 2/60 | 88/23328 | 0.0216 | 0.0460 | 2 |
| BP | GO:1900182 | positive regulation of protein localization to nucleus                           | 2/60 | 88/23328 | 0.0216 | 0.0460 | 2 |
| BP | GO:1904063 | negative regulation of cation transmembrane transport                            | 2/60 | 88/23328 | 0.0216 | 0.0460 | 2 |
| BP | GO:0071674 | mononuclear cell migration                                                       | 2/60 | 89/23328 | 0.0221 | 0.0467 | 2 |
| BP | GO:0032024 | positive regulation of insulin secretion                                         | 2/60 | 90/23328 | 0.0225 | 0.0476 | 2 |
| BP | GO:0014015 | positive regulation of gliogenesis                                               | 2/60 | 91/23328 | 0.0230 | 0.0483 | 2 |

|    |            |                                                                      |      |           |        |        |   |
|----|------------|----------------------------------------------------------------------|------|-----------|--------|--------|---|
| BP | GO:0032890 | regulation of organic acid transport                                 | 2/60 | 91/23328  | 0.0230 | 0.0483 | 2 |
| BP | GO:0044344 | cellular response to fibroblast growth factor stimulus               | 2/60 | 91/23328  | 0.0230 | 0.0483 | 2 |
| BP | GO:1903524 | positive regulation of blood circulation                             | 2/60 | 91/23328  | 0.0230 | 0.0483 | 2 |
| BP | GO:0071774 | response to fibroblast growth factor                                 | 2/60 | 93/23328  | 0.0240 | 0.0499 | 2 |
| BP | GO:0009408 | response to heat                                                     | 2/60 | 94/23328  | 0.0244 | 0.0503 | 2 |
| BP | GO:0031016 | pancreas development                                                 | 2/60 | 96/23328  | 0.0254 | 0.0503 | 2 |
| BP | GO:0070555 | response to interleukin-1                                            | 2/60 | 96/23328  | 0.0254 | 0.0503 | 2 |
| BP | GO:0002709 | regulation of T cell mediated immunity                               | 2/60 | 97/23328  | 0.0259 | 0.0511 | 2 |
| BP | GO:0060395 | SMAD protein signal transduction                                     | 2/60 | 98/23328  | 0.0264 | 0.0518 | 2 |
| BP | GO:0030593 | neutrophil chemotaxis                                                | 2/60 | 99/23328  | 0.0269 | 0.0524 | 2 |
| BP | GO:0070167 | regulation of biomineral tissue development                          | 2/60 | 99/23328  | 0.0269 | 0.0524 | 2 |
| BP | GO:0110149 | regulation of biomineralization                                      | 2/60 | 99/23328  | 0.0269 | 0.0524 | 2 |
| BP | GO:0032006 | regulation of TOR signaling                                          | 2/60 | 100/23328 | 0.0274 | 0.0526 | 2 |
| BP | GO:0050795 | regulation of behavior                                               | 2/60 | 100/23328 | 0.0274 | 0.0526 | 2 |
| BP | GO:0007041 | lysosomal transport                                                  | 2/60 | 101/23328 | 0.0279 | 0.0526 | 2 |
| BP | GO:0071456 | cellular response to hypoxia                                         | 2/60 | 101/23328 | 0.0279 | 0.0526 | 2 |
| BP | GO:2000060 | positive regulation of ubiquitin-dependent protein catabolic process | 2/60 | 101/23328 | 0.0279 | 0.0526 | 2 |
| BP | GO:0070227 | lymphocyte apoptotic process                                         | 2/60 | 102/23328 | 0.0284 | 0.0534 | 2 |
| BP | GO:0042310 | vasoconstriction                                                     | 2/60 | 103/23328 | 0.0289 | 0.0540 | 2 |
| BP | GO:0046427 | positive regulation of receptor signaling pathway via JAK-STAT       | 2/60 | 103/23328 | 0.0289 | 0.0540 | 2 |
| BP | GO:0014074 | response to purine-containing compound                               | 2/60 | 104/23328 | 0.0295 | 0.0541 | 2 |
| BP | GO:0034766 | negative regulation of ion transmembrane transport                   | 2/60 | 104/23328 | 0.0295 | 0.0541 | 2 |
| BP | GO:0045778 | positive regulation of ossification                                  | 2/60 | 104/23328 | 0.0295 | 0.0541 | 2 |
| BP | GO:0046849 | bone remodeling                                                      | 2/60 | 104/23328 | 0.0295 | 0.0541 | 2 |
| BP | GO:0048525 | negative regulation of viral process                                 | 2/60 | 104/23328 | 0.0295 | 0.0541 | 2 |
| BP | GO:0046634 | regulation of alpha-beta T cell activation                           | 2/60 | 105/23328 | 0.0300 | 0.0541 | 2 |

|    |            |                                                                             |      |           |        |        |   |
|----|------------|-----------------------------------------------------------------------------|------|-----------|--------|--------|---|
| BP | GO:0035710 | CD4-positive, alpha-beta T cell activation                                  | 2/60 | 106/23328 | 0.0305 | 0.0541 | 2 |
| BP | GO:0002367 | cytokine production involved in immune response                             | 2/60 | 107/23328 | 0.0310 | 0.0549 | 2 |
| BP | GO:1903426 | regulation of reactive oxygen species biosynthetic process                  | 2/60 | 107/23328 | 0.0310 | 0.0549 | 2 |
| BP | GO:1904894 | positive regulation of receptor signaling pathway via STAT                  | 2/60 | 107/23328 | 0.0310 | 0.0549 | 2 |
| BP | GO:0008306 | associative learning                                                        | 2/60 | 108/23328 | 0.0316 | 0.0553 | 2 |
| BP | GO:0034754 | cellular hormone metabolic process                                          | 2/60 | 108/23328 | 0.0316 | 0.0553 | 2 |
| BP | GO:0051897 | positive regulation of protein kinase B signaling                           | 2/60 | 109/23328 | 0.0321 | 0.0553 | 2 |
| BP | GO:0097756 | negative regulation of blood vessel diameter                                | 2/60 | 109/23328 | 0.0321 | 0.0553 | 2 |
| BP | GO:1901800 | positive regulation of proteasomal protein catabolic process                | 2/60 | 109/23328 | 0.0321 | 0.0553 | 2 |
| BP | GO:0009410 | response to xenobiotic stimulus                                             | 2/60 | 110/23328 | 0.0327 | 0.0553 | 2 |
| BP | GO:0017015 | regulation of transforming growth factor beta receptor signaling pathway    | 2/60 | 110/23328 | 0.0327 | 0.0553 | 2 |
| BP | GO:0022600 | digestive system process                                                    | 2/60 | 110/23328 | 0.0327 | 0.0553 | 2 |
| BP | GO:0008637 | apoptotic mitochondrial changes                                             | 2/60 | 111/23328 | 0.0332 | 0.0554 | 2 |
| BP | GO:0016241 | regulation of macroautophagy                                                | 2/60 | 111/23328 | 0.0332 | 0.0554 | 2 |
| BP | GO:0019218 | regulation of steroid metabolic process                                     | 2/60 | 111/23328 | 0.0332 | 0.0554 | 2 |
| BP | GO:0032963 | collagen metabolic process                                                  | 2/60 | 111/23328 | 0.0332 | 0.0554 | 2 |
| BP | GO:0007589 | body fluid secretion                                                        | 2/60 | 112/23328 | 0.0338 | 0.0560 | 2 |
| BP | GO:1903844 | regulation of cellular response to transforming growth factor beta stimulus | 2/60 | 112/23328 | 0.0338 | 0.0560 | 2 |
| BP | GO:0001942 | hair follicle development                                                   | 2/60 | 113/23328 | 0.0343 | 0.0566 | 2 |
| BP | GO:0050764 | regulation of phagocytosis                                                  | 2/60 | 113/23328 | 0.0343 | 0.0566 | 2 |
| BP | GO:0034440 | lipid oxidation                                                             | 2/60 | 114/23328 | 0.0349 | 0.0566 | 2 |
| BP | GO:2000379 | positive regulation of reactive oxygen species metabolic process            | 2/60 | 114/23328 | 0.0349 | 0.0566 | 2 |
| BP | GO:0018958 | phenol-containing compound metabolic process                                | 2/60 | 115/23328 | 0.0354 | 0.0566 | 2 |
| BP | GO:0030216 | keratinocyte differentiation                                                | 2/60 | 115/23328 | 0.0354 | 0.0566 | 2 |

|    |            |                                                                                   |      |           |        |        |   |
|----|------------|-----------------------------------------------------------------------------------|------|-----------|--------|--------|---|
| BP | GO:0031398 | positive regulation of protein ubiquitination                                     | 2/60 | 115/23328 | 0.0354 | 0.0566 | 2 |
| BP | GO:0022404 | molting cycle process                                                             | 2/60 | 116/23328 | 0.0360 | 0.0573 | 2 |
| BP | GO:0022405 | hair cycle process                                                                | 2/60 | 116/23328 | 0.0360 | 0.0573 | 2 |
| BP | GO:0098773 | skin epidermis development                                                        | 2/60 | 116/23328 | 0.0360 | 0.0573 | 2 |
| BP | GO:0002286 | T cell activation involved in immune response                                     | 2/60 | 117/23328 | 0.0365 | 0.0580 | 2 |
| BP | GO:0071901 | negative regulation of protein serine/threonine kinase activity                   | 2/60 | 117/23328 | 0.0365 | 0.0580 | 2 |
| BP | GO:0032680 | regulation of tumor necrosis factor production                                    | 2/60 | 120/23328 | 0.0383 | 0.0588 | 2 |
| BP | GO:0003158 | endothelium development                                                           | 2/60 | 122/23328 | 0.0394 | 0.0594 | 2 |
| BP | GO:0031929 | TOR signaling                                                                     | 2/60 | 122/23328 | 0.0394 | 0.0594 | 2 |
| BP | GO:1903555 | regulation of tumor necrosis factor superfamily cytokine production               | 2/60 | 122/23328 | 0.0394 | 0.0594 | 2 |
| BP | GO:0002040 | sprouting angiogenesis                                                            | 2/60 | 123/23328 | 0.0400 | 0.0594 | 2 |
| BP | GO:0046474 | glycerophospholipid biosynthetic process                                          | 2/60 | 123/23328 | 0.0400 | 0.0594 | 2 |
| BP | GO:0051153 | regulation of striated muscle cell differentiation                                | 2/60 | 124/23328 | 0.0406 | 0.0595 | 2 |
| BP | GO:0090277 | positive regulation of peptide hormone secretion                                  | 2/60 | 124/23328 | 0.0406 | 0.0595 | 2 |
| BP | GO:1903052 | positive regulation of proteolysis involved in cellular protein catabolic process | 2/60 | 124/23328 | 0.0406 | 0.0595 | 2 |
| BP | GO:1990266 | neutrophil migration                                                              | 2/60 | 124/23328 | 0.0406 | 0.0595 | 2 |
| BP | GO:0007586 | digestion                                                                         | 2/60 | 126/23328 | 0.0418 | 0.0609 | 2 |
| BP | GO:0032640 | tumor necrosis factor production                                                  | 2/60 | 126/23328 | 0.0418 | 0.0609 | 2 |
| BP | GO:0036294 | cellular response to decreased oxygen levels                                      | 2/60 | 126/23328 | 0.0418 | 0.0609 | 2 |
| BP | GO:0071621 | granulocyte chemotaxis                                                            | 2/60 | 126/23328 | 0.0418 | 0.0609 | 2 |
| BP | GO:0045727 | positive regulation of translation                                                | 2/60 | 128/23328 | 0.0430 | 0.0610 | 2 |
| BP | GO:0071706 | tumor necrosis factor superfamily cytokine production                             | 2/60 | 128/23328 | 0.0430 | 0.0610 | 2 |
| BP | GO:0007631 | feeding behavior                                                                  | 2/60 | 130/23328 | 0.0442 | 0.0625 | 2 |
| BP | GO:0042752 | regulation of circadian rhythm                                                    | 2/60 | 130/23328 | 0.0442 | 0.0625 | 2 |
| BP | GO:0090305 | nucleic acid phosphodiester bond hydrolysis                                       | 2/60 | 130/23328 | 0.0442 | 0.0625 | 2 |

|    |            |                                                           |      |           |        |          |
|----|------------|-----------------------------------------------------------|------|-----------|--------|----------|
|    |            | regulation of proteasomal                                 |      |           |        |          |
| BP | GO:0032434 | ubiquitin-dependent protein<br>catabolic process          | 2/60 | 131/23328 | 0.0448 | 0.0625 2 |
| BP | GO:0002456 | T cell mediated immunity                                  | 2/60 | 132/23328 | 0.0454 | 0.0626 2 |
| BP | GO:0034763 | negative regulation of<br>transmembrane transport         | 2/60 | 132/23328 | 0.0454 | 0.0626 2 |
| BP | GO:0042303 | molting cycle                                             | 2/60 | 133/23328 | 0.0461 | 0.0632 2 |
| BP | GO:0042633 | hair cycle                                                | 2/60 | 133/23328 | 0.0461 | 0.0632 2 |
| BP | GO:0044070 | regulation of anion transport                             | 2/60 | 133/23328 | 0.0461 | 0.0632 2 |
| BP | GO:0002698 | negative regulation of immune<br>effector process         | 2/60 | 134/23328 | 0.0467 | 0.0639 2 |
| BP | GO:0051701 | interaction with host                                     | 2/60 | 135/23328 | 0.0473 | 0.0639 2 |
| BP | GO:0072331 | signal transduction by p53 class<br>mediator              | 2/60 | 135/23328 | 0.0473 | 0.0639 2 |
| BP | GO:0035195 | gene silencing by miRNA                                   | 2/60 | 136/23328 | 0.0479 | 0.0640 2 |
| BP | GO:0035821 | modulation of process of other<br>organism                | 2/60 | 137/23328 | 0.0486 | 0.0648 2 |
| BP | GO:0009411 | response to UV                                            | 2/60 | 138/23328 | 0.0492 | 0.0654 2 |
| BP | GO:0030218 | erythrocyte differentiation                               | 2/60 | 138/23328 | 0.0492 | 0.0654 2 |
| BP | GO:0046165 | alcohol biosynthetic process                              | 2/60 | 138/23328 | 0.0492 | 0.0654 2 |
|    |            | positive regulation of protein                            |      |           |        |          |
| BP | GO:1903322 | modification by small protein<br>conjugation or removal   | 2/60 | 139/23328 | 0.0498 | 0.0657 2 |
| BP | GO:0007034 | vacuolar transport                                        | 2/60 | 140/23328 | 0.0505 | 0.0659 2 |
| BP | GO:0071453 | cellular response to oxygen<br>levels                     | 2/60 | 140/23328 | 0.0505 | 0.0659 2 |
| BP | GO:0010821 | regulation of mitochondrion<br>organization               | 2/60 | 142/23328 | 0.0518 | 0.0671 2 |
| BP | GO:0035194 | post-transcriptional gene<br>silencing by RNA             | 2/60 | 142/23328 | 0.0518 | 0.0671 2 |
| BP | GO:0035725 | sodium ion transmembrane<br>transport                     | 2/60 | 143/23328 | 0.0524 | 0.0671 2 |
| BP | GO:0001837 | epithelial to mesenchymal<br>transition                   | 2/60 | 144/23328 | 0.0531 | 0.0675 2 |
| BP | GO:0090316 | positive regulation of<br>intracellular protein transport | 2/60 | 144/23328 | 0.0531 | 0.0675 2 |
| BP | GO:0017148 | negative regulation of<br>translation                     | 2/60 | 145/23328 | 0.0537 | 0.0683 2 |
| BP | GO:0016441 | posttranscriptional gene<br>silencing                     | 2/60 | 146/23328 | 0.0544 | 0.0683 2 |
| BP | GO:0019233 | sensory perception of pain                                | 2/60 | 146/23328 | 0.0544 | 0.0683 2 |
| BP | GO:0061041 | regulation of wound healing                               | 2/60 | 146/23328 | 0.0544 | 0.0683 2 |



|    |            |                                                             |      |           |        |        |   |
|----|------------|-------------------------------------------------------------|------|-----------|--------|--------|---|
| BP | GO:0031333 | negative regulation of protein-containing complex assembly  | 2/60 | 147/23328 | 0.0551 | 0.0683 | 2 |
| BP | GO:0002221 | pattern recognition receptor signaling pathway              | 2/60 | 149/23328 | 0.0564 | 0.0696 | 2 |
| BP | GO:0007613 | memory                                                      | 2/60 | 149/23328 | 0.0564 | 0.0696 | 2 |
| BP | GO:0050921 | positive regulation of chemotaxis                           | 2/60 | 149/23328 | 0.0564 | 0.0696 | 2 |
| BP | GO:0002065 | columnar/cuboidal epithelial cell differentiation           | 2/60 | 150/23328 | 0.0571 | 0.0700 | 2 |
| BP | GO:0031099 | regeneration                                                | 2/60 | 150/23328 | 0.0571 | 0.0700 | 2 |
| BP | GO:0048593 | camera-type eye morphogenesis                               | 2/60 | 151/23328 | 0.0577 | 0.0702 | 2 |
| BP | GO:0030183 | B cell differentiation                                      | 2/60 | 153/23328 | 0.0591 | 0.0716 | 2 |
| BP | GO:0071478 | cellular response to radiation                              | 2/60 | 153/23328 | 0.0591 | 0.0716 | 2 |
| BP | GO:0014013 | regulation of gliogenesis                                   | 2/60 | 154/23328 | 0.0598 | 0.0717 | 2 |
| BP | GO:0097530 | granulocyte migration                                       | 2/60 | 155/23328 | 0.0604 | 0.0722 | 2 |
| BP | GO:0030856 | regulation of epithelial cell differentiation               | 2/60 | 156/23328 | 0.0611 | 0.0729 | 2 |
| BP | GO:0032675 | regulation of interleukin-6 production                      | 2/60 | 156/23328 | 0.0611 | 0.0729 | 2 |
| BP | GO:1903707 | negative regulation of hemopoiesis                          | 2/60 | 157/23328 | 0.0618 | 0.0732 | 2 |
| BP | GO:0051250 | negative regulation of lymphocyte activation                | 2/60 | 158/23328 | 0.0625 | 0.0733 | 2 |
| BP | GO:0071383 | cellular response to steroid hormone stimulus               | 2/60 | 159/23328 | 0.0632 | 0.0740 | 2 |
| BP | GO:2000058 | regulation of ubiquitin-dependent protein catabolic process | 2/60 | 159/23328 | 0.0632 | 0.0740 | 2 |
| BP | GO:1902904 | negative regulation of supramolecular fiber organization    | 2/60 | 163/23328 | 0.0660 | 0.0760 | 2 |
| BP | GO:0010970 | transport along microtubule                                 | 2/60 | 164/23328 | 0.0667 | 0.0760 | 2 |
| BP | GO:0030879 | mammary gland development                                   | 2/60 | 164/23328 | 0.0667 | 0.0760 | 2 |
| BP | GO:0034249 | negative regulation of cellular amide metabolic process     | 2/60 | 164/23328 | 0.0667 | 0.0760 | 2 |
| BP | GO:0046887 | positive regulation of hormone secretion                    | 2/60 | 164/23328 | 0.0667 | 0.0760 | 2 |
| BP | GO:0051224 | negative regulation of protein transport                    | 2/60 | 164/23328 | 0.0667 | 0.0760 | 2 |
| BP | GO:0007565 | female pregnancy                                            | 2/60 | 166/23328 | 0.0681 | 0.0767 | 2 |
| BP | GO:0046631 | alpha-beta T cell activation                                | 2/60 | 166/23328 | 0.0681 | 0.0767 | 2 |

|    |            |                                                              |      |           |        |        |   |
|----|------------|--------------------------------------------------------------|------|-----------|--------|--------|---|
| BP | GO:0051896 | regulation of protein kinase B signaling                     | 2/60 | 166/23328 | 0.0681 | 0.0767 | 2 |
| BP | GO:0032635 | interleukin-6 production                                     | 2/60 | 167/23328 | 0.0689 | 0.0775 | 2 |
| BP | GO:0046425 | regulation of receptor signaling pathway via JAK-STAT        | 2/60 | 168/23328 | 0.0696 | 0.0775 | 2 |
| BP | GO:0007179 | transforming growth factor beta receptor signaling pathway   | 2/60 | 169/23328 | 0.0703 | 0.0780 | 2 |
| BP | GO:0031047 | gene silencing by RNA                                        | 2/60 | 169/23328 | 0.0703 | 0.0780 | 2 |
| BP | GO:1904950 | negative regulation of establishment of protein localization | 2/60 | 169/23328 | 0.0703 | 0.0780 | 2 |
| BP | GO:0030833 | regulation of actin filament polymerization                  | 2/60 | 171/23328 | 0.0717 | 0.0785 | 2 |
| BP | GO:0043409 | negative regulation of MAPK cascade                          | 2/60 | 173/23328 | 0.0732 | 0.0797 | 2 |
| BP | GO:1904892 | regulation of receptor signaling pathway via STAT            | 2/60 | 173/23328 | 0.0732 | 0.0797 | 2 |
| BP | GO:0001890 | placenta development                                         | 2/60 | 174/23328 | 0.0739 | 0.0797 | 2 |
| BP | GO:0042129 | regulation of T cell proliferation                           | 2/60 | 175/23328 | 0.0747 | 0.0799 | 2 |
| BP | GO:0048634 | regulation of muscle organ development                       | 2/60 | 181/23328 | 0.0791 | 0.0820 | 2 |
| BP | GO:0048592 | eye morphogenesis                                            | 2/60 | 182/23328 | 0.0799 | 0.0826 | 2 |
| BP | GO:0009749 | response to glucose                                          | 2/60 | 185/23328 | 0.0821 | 0.0841 | 2 |
| BP | GO:0031644 | regulation of nervous system process                         | 2/60 | 185/23328 | 0.0821 | 0.0841 | 2 |
| BP | GO:1903034 | regulation of response to wounding                           | 2/60 | 186/23328 | 0.0829 | 0.0848 | 2 |
| BP | GO:0030041 | actin filament polymerization                                | 2/60 | 187/23328 | 0.0837 | 0.0848 | 2 |
| BP | GO:0043200 | response to amino acid                                       | 2/60 | 187/23328 | 0.0837 | 0.0848 | 2 |
| BP | GO:0008064 | regulation of actin polymerization or depolymerization       | 2/60 | 188/23328 | 0.0844 | 0.0852 | 2 |
| BP | GO:0009746 | response to hexose                                           | 2/60 | 188/23328 | 0.0844 | 0.0852 | 2 |
| BP | GO:0034284 | response to monosaccharide                                   | 2/60 | 189/23328 | 0.0852 | 0.0855 | 2 |
| BP | GO:0061136 | regulation of proteasomal protein catabolic process          | 2/60 | 189/23328 | 0.0852 | 0.0855 | 2 |
| BP | GO:0030832 | regulation of actin filament length                          | 2/60 | 191/23328 | 0.0867 | 0.0859 | 2 |
| BP | GO:0022408 | negative regulation of cell-cell adhesion                    | 2/60 | 192/23328 | 0.0875 | 0.0866 | 2 |
| BP | GO:0009913 | epidermal cell differentiation                               | 2/60 | 193/23328 | 0.0883 | 0.0871 | 2 |

|    |            |                                                          |      |           |        |        |   |
|----|------------|----------------------------------------------------------|------|-----------|--------|--------|---|
| BP | GO:0030705 | cytoskeleton-dependent intracellular transport           | 2/60 | 194/23328 | 0.0891 | 0.0874 | 2 |
| BP | GO:0050731 | positive regulation of peptidyl-tyrosine phosphorylation | 2/60 | 195/23328 | 0.0898 | 0.0879 | 2 |
| BP | GO:0099111 | microtubule-based transport                              | 2/60 | 195/23328 | 0.0898 | 0.0879 | 2 |
| BP | GO:1905475 | regulation of protein localization to membrane           | 2/60 | 195/23328 | 0.0898 | 0.0879 | 2 |
| BP | GO:0002706 | regulation of lymphocyte mediated immunity               | 2/60 | 196/23328 | 0.0906 | 0.0886 | 2 |
| BP | GO:0043491 | protein kinase B signaling                               | 2/60 | 196/23328 | 0.0906 | 0.0886 | 2 |
| BP | GO:0006911 | phagocytosis, engulfment                                 | 2/60 | 197/23328 | 0.0914 | 0.0889 | 2 |
| BP | GO:0044706 | multi-multicellular organism process                     | 2/60 | 197/23328 | 0.0914 | 0.0889 | 2 |
| BP | GO:1990138 | neuron projection extension                              | 2/60 | 198/23328 | 0.0922 | 0.0894 | 2 |
| BP | GO:0050870 | positive regulation of T cell activation                 | 2/60 | 200/23328 | 0.0938 | 0.0897 | 2 |
| BP | GO:0032869 | cellular response to insulin stimulus                    | 2/60 | 201/23328 | 0.0946 | 0.0903 | 2 |
| BP | GO:0050792 | regulation of viral process                              | 2/60 | 201/23328 | 0.0946 | 0.0903 | 2 |
| BP | GO:0009743 | response to carbohydrate                                 | 2/60 | 203/23328 | 0.0961 | 0.0909 | 2 |
| BP | GO:0009165 | nucleotide biosynthetic process                          | 2/60 | 204/23328 | 0.0969 | 0.0915 | 2 |
| BP | GO:0099024 | plasma membrane invagination                             | 2/60 | 206/23328 | 0.0985 | 0.0920 | 2 |
| BP | GO:0001101 | response to acid chemical                                | 2/60 | 207/23328 | 0.0993 | 0.0927 | 2 |
| BP | GO:0071560 | transforming growth factor beta stimulus                 | 2/60 | 208/23328 | 0.1001 | 0.0928 | 2 |
| BP | GO:0008217 | regulation of blood pressure                             | 2/60 | 209/23328 | 0.1009 | 0.0933 | 2 |
| BP | GO:1901293 | nucleoside phosphate biosynthetic process                | 2/60 | 209/23328 | 0.1009 | 0.0933 | 2 |
| BP | GO:0043112 | receptor metabolic process                               | 2/60 | 212/23328 | 0.1034 | 0.0950 | 2 |
| BP | GO:0071559 | response to transforming growth factor beta              | 2/60 | 212/23328 | 0.1034 | 0.0950 | 2 |
| BP | GO:0008361 | regulation of cell size                                  | 2/60 | 213/23328 | 0.1042 | 0.0954 | 2 |
| BP | GO:0010324 | membrane invagination                                    | 2/60 | 213/23328 | 0.1042 | 0.0954 | 2 |
| BP | GO:0042098 | T cell proliferation                                     | 2/60 | 213/23328 | 0.1042 | 0.0954 | 2 |
| BP | GO:0032984 | protein-containing complex disassembly                   | 2/60 | 214/23328 | 0.1050 | 0.0954 | 2 |
| BP | GO:0008154 | actin polymerization or depolymerization                 | 2/60 | 215/23328 | 0.1058 | 0.0960 | 2 |
| BP | GO:0048839 | inner ear development                                    | 2/60 | 215/23328 | 0.1058 | 0.0960 | 2 |
| BP | GO:0035264 | multicellular organism growth                            | 2/60 | 216/23328 | 0.1066 | 0.0964 | 2 |

|    |            |                                                |      |           |        |        |   |
|----|------------|------------------------------------------------|------|-----------|--------|--------|---|
| BP | GO:0007623 | circadian rhythm                               | 2/60 | 217/23328 | 0.1075 | 0.0966 | 2 |
| BP | GO:0043903 | regulation of symbiotic process                | 2/60 | 218/23328 | 0.1083 | 0.0972 | 2 |
| BP | GO:0019058 | viral life cycle                               | 2/60 | 221/23328 | 0.1108 | 0.0989 | 2 |
|    |            | regulation of proteolysis                      |      |           |        |        |   |
| BP | GO:1903050 | involved in cellular protein catabolic process | 2/60 | 221/23328 | 0.1108 | 0.0989 | 2 |
| BP | GO:0030100 | regulation of endocytosis                      | 2/60 | 222/23328 | 0.1116 | 0.0992 | 2 |
| BP | GO:0061138 | morphogenesis of a branching epithelium        | 2/60 | 222/23328 | 0.1116 | 0.0992 | 2 |
| BP | GO:0045637 | regulation of myeloid cell differentiation     | 2/60 | 224/23328 | 0.1133 | 0.1003 | 2 |
| BP | GO:1903708 | positive regulation of hemopoiesis             | 2/60 | 224/23328 | 0.1133 | 0.1003 | 2 |
| BP | GO:0048762 | mesenchymal cell differentiation               | 2/60 | 225/23328 | 0.1141 | 0.1003 | 2 |
| BP | GO:0032271 | regulation of protein polymerization           | 2/60 | 227/23328 | 0.1158 | 0.1017 | 2 |
| BP | GO:0002274 | myeloid leukocyte activation                   | 2/60 | 231/23328 | 0.1191 | 0.1034 | 2 |
| BP | GO:0050670 | regulation of lymphocyte proliferation         | 2/60 | 231/23328 | 0.1191 | 0.1034 | 2 |
| BP | GO:0006814 | sodium ion transport                           | 2/60 | 234/23328 | 0.1217 | 0.1047 | 2 |
| BP | GO:0032944 | regulation of mononuclear cell proliferation   | 2/60 | 234/23328 | 0.1217 | 0.1047 | 2 |
| BP | GO:0032868 | response to insulin                            | 2/60 | 235/23328 | 0.1225 | 0.1051 | 2 |
| BP | GO:0001763 | morphogenesis of a branching structure         | 2/60 | 241/23328 | 0.1276 | 0.1070 | 2 |
| BP | GO:0046777 | protein autophosphorylation                    | 2/60 | 241/23328 | 0.1276 | 0.1070 | 2 |
| BP | GO:0006260 | DNA replication                                | 2/60 | 244/23328 | 0.1302 | 0.1080 | 2 |
| BP | GO:0090257 | regulation of muscle system process            | 2/60 | 244/23328 | 0.1302 | 0.1080 | 2 |
| BP | GO:0043583 | ear development                                | 2/60 | 246/23328 | 0.1320 | 0.1091 | 2 |
| BP | GO:0060291 | long-term synaptic potentiation                | 2/60 | 248/23328 | 0.1337 | 0.1100 | 2 |
| BP | GO:0010001 | glial cell differentiation                     | 2/60 | 249/23328 | 0.1346 | 0.1100 | 2 |
| BP | GO:0015850 | organic hydroxy compound transport             | 2/60 | 249/23328 | 0.1346 | 0.1100 | 2 |
| BP | GO:0070663 | regulation of leukocyte proliferation          | 2/60 | 251/23328 | 0.1363 | 0.1108 | 2 |
| BP | GO:0021537 | telencephalon development                      | 2/60 | 252/23328 | 0.1372 | 0.1112 | 2 |
| BP | GO:0002064 | epithelial cell development                    | 2/60 | 257/23328 | 0.1416 | 0.1140 | 2 |
| BP | GO:0006650 | glycerophospholipid metabolic process          | 2/60 | 257/23328 | 0.1416 | 0.1140 | 2 |

|    |            |                                                                  |      |           |        |        |   |
|----|------------|------------------------------------------------------------------|------|-----------|--------|--------|---|
| BP | GO:0045665 | negative regulation of neuron differentiation                    | 2/60 | 259/23328 | 0.1433 | 0.1147 | 2 |
| BP | GO:0042493 | response to drug                                                 | 2/60 | 260/23328 | 0.1442 | 0.1153 | 2 |
| BP | GO:0051091 | positive regulation of DNA-binding transcription factor activity | 2/60 | 260/23328 | 0.1442 | 0.1153 | 2 |
| BP | GO:0002377 | immunoglobulin production                                        | 2/60 | 262/23328 | 0.1460 | 0.1163 | 2 |
| BP | GO:0050864 | regulation of B cell activation                                  | 2/60 | 270/23328 | 0.1531 | 0.1201 | 2 |
| BP | GO:0006605 | protein targeting                                                | 2/60 | 271/23328 | 0.1540 | 0.1207 | 2 |
| BP | GO:0002699 | positive regulation of immune effector process                   | 2/60 | 273/23328 | 0.1558 | 0.1218 | 2 |
| BP | GO:0016050 | vesicle organization                                             | 2/60 | 275/23328 | 0.1576 | 0.1228 | 2 |
| BP | GO:0051924 | regulation of calcium ion transport                              | 2/60 | 275/23328 | 0.1576 | 0.1228 | 2 |
| BP | GO:0060560 | developmental growth involved in morphogenesis                   | 2/60 | 275/23328 | 0.1576 | 0.1228 | 2 |
| BP | GO:0016458 | gene silencing                                                   | 2/60 | 279/23328 | 0.1612 | 0.1241 | 2 |
| BP | GO:0060485 | mesenchyme development                                           | 2/60 | 281/23328 | 0.1630 | 0.1248 | 2 |
| BP | GO:0002831 | regulation of response to biotic stimulus                        | 2/60 | 291/23328 | 0.1721 | 0.1301 | 2 |
| BP | GO:0051258 | protein polymerization                                           | 2/60 | 293/23328 | 0.1740 | 0.1311 | 2 |
| BP | GO:0072659 | protein localization to plasma membrane                          | 2/60 | 295/23328 | 0.1758 | 0.1319 | 2 |
| BP | GO:0048511 | rhythmic process                                                 | 2/60 | 301/23328 | 0.1813 | 0.1351 | 2 |
| BP | GO:0030198 | extracellular matrix organization                                | 2/60 | 302/23328 | 0.1822 | 0.1354 | 2 |
| BP | GO:0043062 | extracellular structure organization                             | 2/60 | 303/23328 | 0.1832 | 0.1360 | 2 |
| BP | GO:0016358 | dendrite development                                             | 2/60 | 306/23328 | 0.1859 | 0.1375 | 2 |
| BP | GO:0090596 | sensory organ morphogenesis                                      | 2/60 | 311/23328 | 0.1906 | 0.1401 | 2 |
| BP | GO:0046651 | lymphocyte proliferation                                         | 2/60 | 317/23328 | 0.1962 | 0.1430 | 2 |
| BP | GO:0051146 | striated muscle cell differentiation                             | 2/60 | 317/23328 | 0.1962 | 0.1430 | 2 |
| BP | GO:0032943 | mononuclear cell proliferation                                   | 2/60 | 320/23328 | 0.1990 | 0.1441 | 2 |
| BP | GO:0051235 | maintenance of location                                          | 2/60 | 320/23328 | 0.1990 | 0.1441 | 2 |
| BP | GO:0048562 | embryonic organ morphogenesis                                    | 2/60 | 328/23328 | 0.2065 | 0.1485 | 2 |
| BP | GO:0009100 | glycoprotein metabolic process                                   | 2/60 | 332/23328 | 0.2102 | 0.1501 | 2 |
| BP | GO:0070661 | leukocyte proliferation                                          | 2/60 | 344/23328 | 0.2216 | 0.1562 | 2 |
| BP | GO:0032259 | methylation                                                      | 2/60 | 349/23328 | 0.2263 | 0.1588 | 2 |

|    |            |                                                     |      |           |        |        |   |
|----|------------|-----------------------------------------------------|------|-----------|--------|--------|---|
| BP | GO:0034655 | nucleobase-containing<br>compound catabolic process | 2/60 | 352/23328 | 0.2292 | 0.1600 | 2 |
| BP | GO:0006909 | phagocytosis                                        | 2/60 | 358/23328 | 0.2349 | 0.1627 | 2 |
| BP | GO:1990778 | protein localization to cell<br>periphery           | 2/60 | 363/23328 | 0.2396 | 0.1651 | 2 |
| BP | GO:0018205 | peptidyl-lysine modification                        | 2/60 | 364/23328 | 0.2406 | 0.1657 | 2 |
| BP | GO:0051052 | regulation of DNA metabolic<br>process              | 2/60 | 379/23328 | 0.2549 | 0.1724 | 2 |
| BP | GO:0007018 | microtubule-based movement                          | 2/60 | 385/23328 | 0.2606 | 0.1751 | 2 |
| BP | GO:0060562 | epithelial tube morphogenesis                       | 2/60 | 387/23328 | 0.2625 | 0.1758 | 2 |
| BP | GO:0051098 | regulation of binding                               | 2/60 | 390/23328 | 0.2654 | 0.1773 | 2 |
| BP | GO:0003012 | muscle system process                               | 2/60 | 408/23328 | 0.2826 | 0.1858 | 2 |
| BP | GO:0030099 | myeloid cell differentiation                        | 2/60 | 414/23328 | 0.2883 | 0.1888 | 2 |
| BP | GO:0051251 | positive regulation of<br>lymphocyte activation     | 2/60 | 416/23328 | 0.2902 | 0.1897 | 2 |
| BP | GO:0042113 | B cell activation                                   | 2/60 | 417/23328 | 0.2912 | 0.1901 | 2 |
| BP | GO:0010639 | negative regulation of organelle<br>organization    | 2/60 | 420/23328 | 0.2940 | 0.1916 | 2 |
| BP | GO:0016055 | Wnt signaling pathway                               | 2/60 | 430/23328 | 0.3035 | 0.1963 | 2 |
| BP | GO:0002449 | lymphocyte mediated immunity                        | 2/60 | 432/23328 | 0.3055 | 0.1972 | 2 |
| BP | GO:0198738 | cell-cell signaling by wnt                          | 2/60 | 432/23328 | 0.3055 | 0.1972 | 2 |
| BP | GO:0034660 | ncRNA metabolic process                             | 2/60 | 444/23328 | 0.3169 | 0.2029 | 2 |
| BP | GO:0014706 | striated muscle tissue<br>development               | 2/60 | 447/23328 | 0.3197 | 0.2045 | 2 |
| BP | GO:0016570 | histone modification                                | 2/60 | 448/23328 | 0.3206 | 0.2050 | 2 |
| BP | GO:0016569 | covalent chromatin<br>modification                  | 2/60 | 462/23328 | 0.3339 | 0.2117 | 2 |
| BP | GO:0060537 | muscle tissue development                           | 2/60 | 470/23328 | 0.3414 | 0.2159 | 2 |
| BP | GO:0007389 | pattern specification process                       | 2/60 | 478/23328 | 0.3489 | 0.2201 | 2 |
| CC | GO:0044754 | autolysosome                                        | 2/61 | 12/23271  | 0.0004 | 0.0095 | 2 |
| CC | GO:0005767 | secondary lysosome                                  | 2/61 | 16/23271  | 0.0008 | 0.0128 | 2 |
| CC | GO:0031430 | M band                                              | 2/61 | 19/23271  | 0.0011 | 0.0162 | 2 |
| CC | GO:0031672 | A band                                              | 2/61 | 38/23271  | 0.0045 | 0.0482 | 2 |
| CC | GO:0009925 | basal plasma membrane                               | 2/61 | 60/23271  | 0.0109 | 0.0702 | 2 |
| CC | GO:0005776 | autophagosome                                       | 2/61 | 73/23271  | 0.0158 | 0.0842 | 2 |
| CC | GO:0000932 | P-body                                              | 2/61 | 76/23271  | 0.0170 | 0.0842 | 2 |
| CC | GO:0045178 | basal part of cell                                  | 2/61 | 83/23271  | 0.0201 | 0.0866 | 2 |
| CC | GO:0005902 | microvillus                                         | 2/61 | 101/23271 | 0.0289 | 0.0961 | 2 |
| CC | GO:1990204 | oxidoreductase complex                              | 2/61 | 110/23271 | 0.0338 | 0.1018 | 2 |
| CC | GO:0043204 | perikaryon                                          | 2/61 | 140/23271 | 0.0522 | 0.1286 | 2 |
| CC | GO:0030027 | lamellipodium                                       | 2/61 | 171/23271 | 0.0741 | 0.1500 | 2 |

|    |            |                                                                 |      |           |        |        |   |
|----|------------|-----------------------------------------------------------------|------|-----------|--------|--------|---|
| CC | GO:0005741 | mitochondrial outer membrane                                    | 2/61 | 175/23271 | 0.0772 | 0.1513 | 2 |
| CC | GO:0030139 | endocytic vesicle                                               | 2/61 | 200/23271 | 0.0968 | 0.1587 | 2 |
| CC | GO:0043209 | myelin sheath                                                   | 2/61 | 213/23271 | 0.1075 | 0.1740 | 2 |
| CC | GO:0036464 | cytoplasmic ribonucleoprotein granule                           | 2/61 | 218/23271 | 0.1117 | 0.1754 | 2 |
| CC | GO:0098858 | actin-based cell projection                                     | 2/61 | 221/23271 | 0.1143 | 0.1754 | 2 |
| CC | GO:0031514 | motile cilium                                                   | 2/61 | 222/23271 | 0.1151 | 0.1754 | 2 |
| CC | GO:0035770 | ribonucleoprotein granule                                       | 2/61 | 229/23271 | 0.1212 | 0.1824 | 2 |
| CC | GO:0014069 | postsynaptic density                                            | 2/61 | 400/23271 | 0.2822 | 0.2978 | 2 |
| CC | GO:0030141 | secretory granule                                               | 2/61 | 401/23271 | 0.2832 | 0.2978 | 2 |
| CC | GO:0032279 | asymmetric synapse                                              | 2/61 | 405/23271 | 0.2871 | 0.2978 | 2 |
| CC | GO:0005635 | nuclear envelope                                                | 2/61 | 421/23271 | 0.3027 | 0.3011 | 2 |
| CC | GO:0098984 | neuron to neuron synapse                                        | 2/61 | 433/23271 | 0.3143 | 0.3037 | 2 |
| CC | GO:0099572 | postsynaptic specialization                                     | 2/61 | 439/23271 | 0.3201 | 0.3055 | 2 |
| CC | GO:0005667 | transcription regulator complex                                 | 2/61 | 460/23271 | 0.3403 | 0.3142 | 2 |
| MF | GO:0031956 | medium-chain fatty acid-CoA ligase activity                     | 2/58 | 11/22669  | 0.0003 | 0.0096 | 2 |
| MF | GO:0005324 | long-chain fatty acid transporter activity                      | 2/58 | 19/22669  | 0.0011 | 0.0132 | 2 |
| MF | GO:0036041 | long-chain fatty acid binding                                   | 2/58 | 20/22669  | 0.0012 | 0.0132 | 2 |
| MF | GO:0015645 | fatty acid ligase activity                                      | 2/58 | 21/22669  | 0.0013 | 0.0132 | 2 |
| MF | GO:0005355 | glucose transmembrane transporter activity                      | 2/58 | 22/22669  | 0.0014 | 0.0132 | 2 |
| MF | GO:0015149 | hexose transmembrane transporter activity                       | 2/58 | 22/22669  | 0.0014 | 0.0132 | 2 |
| MF | GO:0016881 | acid-amino acid ligase activity                                 | 2/58 | 22/22669  | 0.0014 | 0.0132 | 2 |
| MF | GO:0070530 | K63-linked polyubiquitin modification-dependent protein binding | 2/58 | 22/22669  | 0.0014 | 0.0132 | 2 |
| MF | GO:0090482 | vitamin transmembrane transporter activity                      | 2/58 | 23/22669  | 0.0016 | 0.0133 | 2 |
| MF | GO:0015145 | monosaccharide transmembrane transporter activity               | 2/58 | 24/22669  | 0.0017 | 0.0133 | 2 |
| MF | GO:0000062 | fatty-acyl-CoA binding                                          | 2/58 | 25/22669  | 0.0019 | 0.0133 | 2 |
| MF | GO:0016405 | CoA-ligase activity                                             | 2/58 | 25/22669  | 0.0019 | 0.0133 | 2 |
| MF | GO:0051119 | sugar transmembrane transporter activity                        | 2/58 | 25/22669  | 0.0019 | 0.0133 | 2 |
| MF | GO:0044183 | protein folding chaperone                                       | 2/58 | 26/22669  | 0.0020 | 0.0138 | 2 |
| MF | GO:0016878 | acid-thiol ligase activity                                      | 2/58 | 28/22669  | 0.0023 | 0.0150 | 2 |
| MF | GO:0120227 | acyl-CoA binding                                                | 2/58 | 28/22669  | 0.0023 | 0.0150 | 2 |
| MF | GO:0071889 | 14-3-3 protein binding                                          | 2/58 | 31/22669  | 0.0029 | 0.0172 | 2 |

|    |            |                                                                                       |      |           |        |        |   |
|----|------------|---------------------------------------------------------------------------------------|------|-----------|--------|--------|---|
| MF | GO:1901567 | fatty acid derivative binding                                                         | 2/58 | 35/22669  | 0.0036 | 0.0205 | 2 |
| MF | GO:0015144 | carbohydrate transmembrane transporter activity                                       | 2/58 | 36/22669  | 0.0038 | 0.0211 | 2 |
| MF | GO:0016877 | ligase activity, forming carbon-sulfur bonds                                          | 2/58 | 39/22669  | 0.0045 | 0.0240 | 2 |
| MF | GO:0005548 | phospholipid transporter activity                                                     | 2/58 | 47/22669  | 0.0065 | 0.0311 | 2 |
| MF | GO:0070888 | E-box binding                                                                         | 2/58 | 47/22669  | 0.0065 | 0.0311 | 2 |
| MF | GO:0016879 | ligase activity, forming carbon-nitrogen bonds                                        | 2/58 | 49/22669  | 0.0070 | 0.0329 | 2 |
| MF | GO:0005504 | fatty acid binding                                                                    | 2/58 | 52/22669  | 0.0079 | 0.0360 | 2 |
| MF | GO:0004860 | protein kinase inhibitor activity                                                     | 2/58 | 54/22669  | 0.0085 | 0.0373 | 2 |
| MF | GO:0031593 | polyubiquitin modification-dependent protein binding                                  | 2/58 | 55/22669  | 0.0088 | 0.0373 | 2 |
| MF | GO:0019210 | kinase inhibitor activity                                                             | 2/58 | 59/22669  | 0.0100 | 0.0402 | 2 |
| MF | GO:0015179 | L-amino acid transmembrane transporter activity                                       | 2/58 | 61/22669  | 0.0107 | 0.0420 | 2 |
| MF | GO:0005080 | protein kinase C binding                                                              | 2/58 | 63/22669  | 0.0114 | 0.0435 | 2 |
| MF | GO:0043621 | protein self-association                                                              | 2/58 | 66/22669  | 0.0124 | 0.0452 | 2 |
| MF | GO:0070491 | repressing transcription factor binding                                               | 2/58 | 73/22669  | 0.0151 | 0.0518 | 2 |
| MF | GO:0033293 | monocarboxylic acid binding                                                           | 2/58 | 82/22669  | 0.0187 | 0.0633 | 2 |
| MF | GO:0015171 | amino acid transmembrane transporter activity                                         | 2/58 | 84/22669  | 0.0196 | 0.0640 | 2 |
| MF | GO:0051082 | unfolded protein binding                                                              | 2/58 | 84/22669  | 0.0196 | 0.0640 | 2 |
| MF | GO:0033613 | activating transcription factor binding                                               | 2/58 | 85/22669  | 0.0201 | 0.0644 | 2 |
| MF | GO:0005546 | phosphatidylinositol-4,5-bisphosphate binding                                         | 2/58 | 90/22669  | 0.0223 | 0.0693 | 2 |
| MF | GO:0008170 | N-methyltransferase activity                                                          | 2/58 | 92/22669  | 0.0232 | 0.0704 | 2 |
| MF | GO:0042826 | histone deacetylase binding                                                           | 2/58 | 123/22669 | 0.0396 | 0.0798 | 2 |
| MF | GO:1902936 | phosphatidylinositol bisphosphate binding                                             | 2/58 | 123/22669 | 0.0396 | 0.0798 | 2 |
| MF | GO:0019955 | cytokine binding                                                                      | 2/58 | 136/22669 | 0.0475 | 0.0872 | 2 |
| MF | GO:0016616 | oxidoreductase activity, acting on the CH-OH group of donors, NAD or NADP as acceptor | 2/58 | 142/22669 | 0.0513 | 0.0915 | 2 |
| MF | GO:0008083 | growth factor activity                                                                | 2/58 | 147/22669 | 0.0545 | 0.0920 | 2 |
| MF | GO:0070851 | growth factor receptor binding                                                        | 2/58 | 149/22669 | 0.0558 | 0.0920 | 2 |
| MF | GO:0008757 | S-adenosylmethionine-dependent methyltransferase activity                             | 2/58 | 151/22669 | 0.0572 | 0.0920 | 2 |



|    |            |                                                                                                       |      |           |        |        |   |
|----|------------|-------------------------------------------------------------------------------------------------------|------|-----------|--------|--------|---|
| MF | GO:0016614 | oxidoreductase activity, acting on CH-OH group of donors                                              | 2/58 | 151/22669 | 0.0572 | 0.0920 | 2 |
| MF | GO:0002020 | protease binding                                                                                      | 2/58 | 152/22669 | 0.0578 | 0.0920 | 2 |
| MF | GO:0016853 | isomerase activity                                                                                    | 2/58 | 153/22669 | 0.0585 | 0.0920 | 2 |
| MF | GO:0020037 | heme binding                                                                                          | 2/58 | 159/22669 | 0.0626 | 0.0920 | 2 |
| MF | GO:0008234 | cysteine-type peptidase activity                                                                      | 2/58 | 160/22669 | 0.0633 | 0.0920 | 2 |
| MF | GO:0046943 | carboxylic acid transmembrane transporter activity                                                    | 2/58 | 160/22669 | 0.0633 | 0.0920 | 2 |
| MF | GO:0005342 | organic acid transmembrane transporter activity                                                       | 2/58 | 161/22669 | 0.0640 | 0.0920 | 2 |
| MF | GO:0046906 | tetrapyrrole binding                                                                                  | 2/58 | 168/22669 | 0.0689 | 0.0953 | 2 |
| MF | GO:1901981 | phosphatidylinositol phosphate binding                                                                | 2/58 | 184/22669 | 0.0806 | 0.1035 | 2 |
| MF | GO:0016829 | lyase activity                                                                                        | 2/58 | 188/22669 | 0.0837 | 0.1060 | 2 |
| MF | GO:0140030 | modification-dependent protein binding                                                                | 2/58 | 192/22669 | 0.0867 | 0.1085 | 2 |
| MF | GO:0000287 | magnesium ion binding                                                                                 | 2/58 | 197/22669 | 0.0906 | 0.1104 | 2 |
| MF | GO:0008168 | methyltransferase activity                                                                            | 2/58 | 205/22669 | 0.0969 | 0.1124 | 2 |
| MF | GO:0016705 | oxidoreductase activity, acting on paired donors, with incorporation or reduction of molecular oxygen | 2/58 | 213/22669 | 0.1033 | 0.1155 | 2 |
| MF | GO:0016741 | transferase activity, transferring one-carbon groups                                                  | 2/58 | 216/22669 | 0.1057 | 0.1155 | 2 |
| MF | GO:0016747 | transferase activity, transferring acyl groups other than amino-acyl groups                           | 2/58 | 233/22669 | 0.1198 | 0.1240 | 2 |
| MF | GO:1901681 | sulfur compound binding                                                                               | 2/58 | 260/22669 | 0.1430 | 0.1370 | 2 |
| MF | GO:0035091 | phosphatidylinositol binding                                                                          | 2/58 | 266/22669 | 0.1483 | 0.1387 | 2 |
| MF | GO:0046982 | protein heterodimerization activity                                                                   | 2/58 | 290/22669 | 0.1698 | 0.1514 | 2 |
| MF | GO:0022804 | active transmembrane transporter activity                                                             | 2/58 | 341/22669 | 0.2170 | 0.1802 | 2 |
| MF | GO:0003729 | mRNA binding                                                                                          | 2/58 | 345/22669 | 0.2208 | 0.1816 | 2 |
| MF | GO:0042578 | phosphoric ester hydrolase activity                                                                   | 2/58 | 357/22669 | 0.2321 | 0.1855 | 2 |
| MF | GO:0004857 | enzyme inhibitor activity                                                                             | 2/58 | 392/22669 | 0.2653 | 0.2078 | 2 |
| MF | GO:0016887 | ATPase activity                                                                                       | 2/58 | 404/22669 | 0.2767 | 0.2149 | 2 |
| MF | GO:0004674 | protein serine/threonine kinase activity                                                              | 2/58 | 439/22669 | 0.3099 | 0.2351 | 2 |
| MF | GO:0003712 | transcription coregulator activity                                                                    | 2/58 | 441/22669 | 0.3118 | 0.2354 | 2 |

|    |            |                                                         |      |           |        |        |   |
|----|------------|---------------------------------------------------------|------|-----------|--------|--------|---|
| MF | GO:0005543 | phospholipid binding                                    | 2/58 | 448/22669 | 0.3184 | 0.2378 | 2 |
| BP | GO:0002315 | marginal zone B cell differentiation                    | 1/60 | 10/23328  | 0.0254 | 0.0503 | 1 |
| BP | GO:0002634 | regulation of germinal center formation                 | 1/60 | 10/23328  | 0.0254 | 0.0503 | 1 |
| BP | GO:0006591 | ornithine metabolic process                             | 1/60 | 10/23328  | 0.0254 | 0.0503 | 1 |
| BP | GO:0006707 | cholesterol catabolic process                           | 1/60 | 10/23328  | 0.0254 | 0.0503 | 1 |
| BP | GO:0015801 | aromatic amino acid transport                           | 1/60 | 10/23328  | 0.0254 | 0.0503 | 1 |
| BP | GO:0016127 | sterol catabolic process                                | 1/60 | 10/23328  | 0.0254 | 0.0503 | 1 |
| BP | GO:0030300 | regulation of intestinal cholesterol absorption         | 1/60 | 10/23328  | 0.0254 | 0.0503 | 1 |
| BP | GO:0031620 | regulation of fever generation                          | 1/60 | 10/23328  | 0.0254 | 0.0503 | 1 |
| BP | GO:0033234 | negative regulation of protein sumoylation              | 1/60 | 10/23328  | 0.0254 | 0.0503 | 1 |
| BP | GO:0035871 | protein K11-linked deubiquitination                     | 1/60 | 10/23328  | 0.0254 | 0.0503 | 1 |
| BP | GO:0036462 | TRAIL-activated apoptotic signaling pathway             | 1/60 | 10/23328  | 0.0254 | 0.0503 | 1 |
| BP | GO:0043301 | negative regulation of leukocyte degranulation          | 1/60 | 10/23328  | 0.0254 | 0.0503 | 1 |
| BP | GO:0045542 | positive regulation of cholesterol biosynthetic process | 1/60 | 10/23328  | 0.0254 | 0.0503 | 1 |
| BP | GO:0048671 | negative regulation of collateral sprouting             | 1/60 | 10/23328  | 0.0254 | 0.0503 | 1 |
| BP | GO:0051340 | regulation of ligase activity                           | 1/60 | 10/23328  | 0.0254 | 0.0503 | 1 |
| BP | GO:0051775 | response to redox state                                 | 1/60 | 10/23328  | 0.0254 | 0.0503 | 1 |
| BP | GO:0051971 | positive regulation of transmission of nerve impulse    | 1/60 | 10/23328  | 0.0254 | 0.0503 | 1 |
| BP | GO:0061635 | regulation of protein complex stability                 | 1/60 | 10/23328  | 0.0254 | 0.0503 | 1 |
| BP | GO:0070244 | negative regulation of thymocyte apoptotic process      | 1/60 | 10/23328  | 0.0254 | 0.0503 | 1 |
| BP | GO:0070391 | response to lipoteichoic acid                           | 1/60 | 10/23328  | 0.0254 | 0.0503 | 1 |
| BP | GO:0070417 | cellular response to cold                               | 1/60 | 10/23328  | 0.0254 | 0.0503 | 1 |
| BP | GO:0071223 | cellular response to lipoteichoic acid                  | 1/60 | 10/23328  | 0.0254 | 0.0503 | 1 |
| BP | GO:0090091 | positive regulation of extracellular matrix disassembly | 1/60 | 10/23328  | 0.0254 | 0.0503 | 1 |
| BP | GO:0090269 | fibroblast growth factor production                     | 1/60 | 10/23328  | 0.0254 | 0.0503 | 1 |
| BP | GO:0090270 | regulation of fibroblast growth factor production       | 1/60 | 10/23328  | 0.0254 | 0.0503 | 1 |

|    |            |                                                                                                              |      |          |        |        |   |
|----|------------|--------------------------------------------------------------------------------------------------------------|------|----------|--------|--------|---|
| BP | GO:0106049 | regulation of cellular response to osmotic stress                                                            | 1/60 | 10/23328 | 0.0254 | 0.0503 | 1 |
| BP | GO:0106120 | positive regulation of sterol biosynthetic process                                                           | 1/60 | 10/23328 | 0.0254 | 0.0503 | 1 |
| BP | GO:1990253 | cellular response to leucine starvation                                                                      | 1/60 | 10/23328 | 0.0254 | 0.0503 | 1 |
| BP | GO:2000192 | negative regulation of fatty acid transport                                                                  | 1/60 | 10/23328 | 0.0254 | 0.0503 | 1 |
| BP | GO:2000489 | regulation of hepatic stellate cell activation                                                               | 1/60 | 10/23328 | 0.0254 | 0.0503 | 1 |
| BP | GO:2000551 | regulation of T-helper 2 cell cytokine production                                                            | 1/60 | 10/23328 | 0.0254 | 0.0503 | 1 |
| BP | GO:0002676 | regulation of chronic inflammatory response                                                                  | 1/60 | 11/23328 | 0.0279 | 0.0526 | 1 |
| BP | GO:0006107 | oxaloacetate metabolic process                                                                               | 1/60 | 11/23328 | 0.0279 | 0.0526 | 1 |
| BP | GO:0031053 | primary miRNA processing                                                                                     | 1/60 | 11/23328 | 0.0279 | 0.0526 | 1 |
| BP | GO:0032959 | inositol trisphosphate biosynthetic process                                                                  | 1/60 | 11/23328 | 0.0279 | 0.0526 | 1 |
| BP | GO:0033700 | phospholipid efflux                                                                                          | 1/60 | 11/23328 | 0.0279 | 0.0526 | 1 |
| BP | GO:0034115 | negative regulation of heterotypic cell-cell adhesion                                                        | 1/60 | 11/23328 | 0.0279 | 0.0526 | 1 |
| BP | GO:0035336 | long-chain fatty-acyl-CoA metabolic process                                                                  | 1/60 | 11/23328 | 0.0279 | 0.0526 | 1 |
| BP | GO:0036490 | regulation of translation in response to endoplasmic reticulum stress                                        | 1/60 | 11/23328 | 0.0279 | 0.0526 | 1 |
| BP | GO:0042762 | regulation of sulfur metabolic process                                                                       | 1/60 | 11/23328 | 0.0279 | 0.0526 | 1 |
| BP | GO:0045602 | negative regulation of endothelial cell differentiation                                                      | 1/60 | 11/23328 | 0.0279 | 0.0526 | 1 |
| BP | GO:0045647 | negative regulation of erythrocyte differentiation                                                           | 1/60 | 11/23328 | 0.0279 | 0.0526 | 1 |
| BP | GO:0070587 | regulation of cell-cell adhesion involved in gastrulation                                                    | 1/60 | 11/23328 | 0.0279 | 0.0526 | 1 |
| BP | GO:0071864 | positive regulation of cell proliferation in bone marrow                                                     | 1/60 | 11/23328 | 0.0279 | 0.0526 | 1 |
| BP | GO:0090205 | positive regulation of cholesterol metabolic process                                                         | 1/60 | 11/23328 | 0.0279 | 0.0526 | 1 |
| BP | GO:1902166 | negative regulation of intrinsic apoptotic signaling pathway in response to DNA damage by p53 class mediator | 1/60 | 11/23328 | 0.0279 | 0.0526 | 1 |

|    |            |                                                                                                                  |      |          |        |        |   |
|----|------------|------------------------------------------------------------------------------------------------------------------|------|----------|--------|--------|---|
| BP | GO:1904729 | regulation of intestinal lipid absorption                                                                        | 1/60 | 11/23328 | 0.0279 | 0.0526 | 1 |
| BP | GO:1990440 | positive regulation of transcription from RNA polymerase II promoter in response to endoplasmic reticulum stress | 1/60 | 11/23328 | 0.0279 | 0.0526 | 1 |
| BP | GO:2001280 | positive regulation of unsaturated fatty acid biosynthetic process                                               | 1/60 | 11/23328 | 0.0279 | 0.0526 | 1 |
| BP | GO:0009071 | serine family amino acid catabolic process                                                                       | 1/60 | 12/23328 | 0.0304 | 0.0541 | 1 |
| BP | GO:0010870 | positive regulation of receptor biosynthetic process                                                             | 1/60 | 12/23328 | 0.0304 | 0.0541 | 1 |
| BP | GO:0030949 | positive regulation of vascular endothelial growth factor receptor signaling pathway                             | 1/60 | 12/23328 | 0.0304 | 0.0541 | 1 |
| BP | GO:0031392 | regulation of prostaglandin biosynthetic process                                                                 | 1/60 | 12/23328 | 0.0304 | 0.0541 | 1 |
| BP | GO:0033004 | negative regulation of mast cell activation                                                                      | 1/60 | 12/23328 | 0.0304 | 0.0541 | 1 |
| BP | GO:0033210 | leptin-mediated signaling pathway                                                                                | 1/60 | 12/23328 | 0.0304 | 0.0541 | 1 |
| BP | GO:0033632 | regulation of cell-cell adhesion mediated by integrin                                                            | 1/60 | 12/23328 | 0.0304 | 0.0541 | 1 |
| BP | GO:0035376 | sterol import                                                                                                    | 1/60 | 12/23328 | 0.0304 | 0.0541 | 1 |
| BP | GO:0035437 | maintenance of protein localization in endoplasmic reticulum                                                     | 1/60 | 12/23328 | 0.0304 | 0.0541 | 1 |
| BP | GO:0035733 | hepatic stellate cell activation                                                                                 | 1/60 | 12/23328 | 0.0304 | 0.0541 | 1 |
| BP | GO:0042447 | hormone catabolic process                                                                                        | 1/60 | 12/23328 | 0.0304 | 0.0541 | 1 |
| BP | GO:0043455 | regulation of secondary metabolic process                                                                        | 1/60 | 12/23328 | 0.0304 | 0.0541 | 1 |
| BP | GO:0045717 | negative regulation of fatty acid biosynthetic process                                                           | 1/60 | 12/23328 | 0.0304 | 0.0541 | 1 |
| BP | GO:0048021 | regulation of melanin biosynthetic process                                                                       | 1/60 | 12/23328 | 0.0304 | 0.0541 | 1 |
| BP | GO:0051024 | positive regulation of immunoglobulin secretion                                                                  | 1/60 | 12/23328 | 0.0304 | 0.0541 | 1 |
| BP | GO:0060159 | regulation of dopamine receptor signaling pathway                                                                | 1/60 | 12/23328 | 0.0304 | 0.0541 | 1 |

|    |            |                                                                                 |      |          |        |        |   |
|----|------------|---------------------------------------------------------------------------------|------|----------|--------|--------|---|
| BP | GO:0060213 | positive regulation of nuclear-transcribed mRNA poly(A) tail shortening         | 1/60 | 12/23328 | 0.0304 | 0.0541 | 1 |
| BP | GO:0060586 | multicellular organismal iron ion homeostasis                                   | 1/60 | 12/23328 | 0.0304 | 0.0541 | 1 |
| BP | GO:0060872 | semicircular canal development                                                  | 1/60 | 12/23328 | 0.0304 | 0.0541 | 1 |
| BP | GO:0061744 | motor behavior                                                                  | 1/60 | 12/23328 | 0.0304 | 0.0541 | 1 |
| BP | GO:0070508 | cholesterol import                                                              | 1/60 | 12/23328 | 0.0304 | 0.0541 | 1 |
| BP | GO:0070586 | cell-cell adhesion involved in gastrulation                                     | 1/60 | 12/23328 | 0.0304 | 0.0541 | 1 |
| BP | GO:0071863 | regulation of cell proliferation in bone marrow                                 | 1/60 | 12/23328 | 0.0304 | 0.0541 | 1 |
| BP | GO:0097113 | AMPA glutamate receptor clustering                                              | 1/60 | 12/23328 | 0.0304 | 0.0541 | 1 |
| BP | GO:0097709 | connective tissue replacement                                                   | 1/60 | 12/23328 | 0.0304 | 0.0541 | 1 |
| BP | GO:1900376 | regulation of secondary metabolite biosynthetic process                         | 1/60 | 12/23328 | 0.0304 | 0.0541 | 1 |
| BP | GO:1902510 | regulation of apoptotic DNA fragmentation                                       | 1/60 | 12/23328 | 0.0304 | 0.0541 | 1 |
| BP | GO:1903800 | positive regulation of production of miRNAs involved in gene silencing by miRNA | 1/60 | 12/23328 | 0.0304 | 0.0541 | 1 |
| BP | GO:2000561 | regulation of CD4-positive, alpha-beta T cell proliferation                     | 1/60 | 12/23328 | 0.0304 | 0.0541 | 1 |
| BP | GO:0001660 | fever generation                                                                | 1/60 | 13/23328 | 0.0329 | 0.0553 | 1 |
| BP | GO:0006521 | regulation of cellular amino acid metabolic process                             | 1/60 | 13/23328 | 0.0329 | 0.0553 | 1 |
| BP | GO:0006983 | ER overload response                                                            | 1/60 | 13/23328 | 0.0329 | 0.0553 | 1 |
| BP | GO:0009263 | deoxyribonucleotide biosynthetic process                                        | 1/60 | 13/23328 | 0.0329 | 0.0553 | 1 |
| BP | GO:0010998 | regulation of translational initiation by eIF2 alpha phosphorylation            | 1/60 | 13/23328 | 0.0329 | 0.0553 | 1 |
| BP | GO:0015816 | glycine transport                                                               | 1/60 | 13/23328 | 0.0329 | 0.0553 | 1 |
| BP | GO:0031652 | positive regulation of heat generation                                          | 1/60 | 13/23328 | 0.0329 | 0.0553 | 1 |
| BP | GO:0032060 | bleb assembly                                                                   | 1/60 | 13/23328 | 0.0329 | 0.0553 | 1 |
| BP | GO:0034497 | protein localization to phagophore assembly site                                | 1/60 | 13/23328 | 0.0329 | 0.0553 | 1 |
| BP | GO:0035630 | bone mineralization involved in bone maturation                                 | 1/60 | 13/23328 | 0.0329 | 0.0553 | 1 |

|    |            |                                                                                    |      |          |        |        |   |
|----|------------|------------------------------------------------------------------------------------|------|----------|--------|--------|---|
| BP | GO:0035739 | CD4-positive, alpha-beta T cell proliferation                                      | 1/60 | 13/23328 | 0.0329 | 0.0553 | 1 |
| BP | GO:0042541 | hemoglobin biosynthetic process                                                    | 1/60 | 13/23328 | 0.0329 | 0.0553 | 1 |
| BP | GO:0045628 | regulation of T-helper 2 cell differentiation                                      | 1/60 | 13/23328 | 0.0329 | 0.0553 | 1 |
| BP | GO:0045906 | negative regulation of vasoconstriction                                            | 1/60 | 13/23328 | 0.0329 | 0.0553 | 1 |
| BP | GO:0048102 | autophagic cell death                                                              | 1/60 | 13/23328 | 0.0329 | 0.0553 | 1 |
| BP | GO:0055091 | phospholipid homeostasis                                                           | 1/60 | 13/23328 | 0.0329 | 0.0553 | 1 |
| BP | GO:0061052 | negative regulation of cell growth involved in cardiac muscle cell development     | 1/60 | 13/23328 | 0.0329 | 0.0553 | 1 |
| BP | GO:0061418 | regulation of transcription from RNA polymerase II promoter in response to hypoxia | 1/60 | 13/23328 | 0.0329 | 0.0553 | 1 |
| BP | GO:0070091 | glucagon secretion                                                                 | 1/60 | 13/23328 | 0.0329 | 0.0553 | 1 |
| BP | GO:0070092 | regulation of glucagon secretion                                                   | 1/60 | 13/23328 | 0.0329 | 0.0553 | 1 |
| BP | GO:0071294 | cellular response to zinc ion                                                      | 1/60 | 13/23328 | 0.0329 | 0.0553 | 1 |
| BP | GO:0071838 | cell proliferation in bone marrow                                                  | 1/60 | 13/23328 | 0.0329 | 0.0553 | 1 |
| BP | GO:0072540 | T-helper 17 cell lineage commitment                                                | 1/60 | 13/23328 | 0.0329 | 0.0553 | 1 |
| BP | GO:0097011 | cellular response to granulocyte macrophage colony-stimulating factor stimulus     | 1/60 | 13/23328 | 0.0329 | 0.0553 | 1 |
| BP | GO:0097688 | glutamate receptor clustering                                                      | 1/60 | 13/23328 | 0.0329 | 0.0553 | 1 |
| BP | GO:0110154 | RNA decapping                                                                      | 1/60 | 13/23328 | 0.0329 | 0.0553 | 1 |
| BP | GO:0110156 | methylguanosine-cap decapping                                                      | 1/60 | 13/23328 | 0.0329 | 0.0553 | 1 |
| BP | GO:2001054 | negative regulation of mesenchymal cell apoptotic process                          | 1/60 | 13/23328 | 0.0329 | 0.0553 | 1 |
| BP | GO:0008298 | intracellular mRNA localization                                                    | 1/60 | 14/23328 | 0.0354 | 0.0566 | 1 |
| BP | GO:0019896 | axonal transport of mitochondrion                                                  | 1/60 | 14/23328 | 0.0354 | 0.0566 | 1 |
| BP | GO:0021984 | adenohypophysis development                                                        | 1/60 | 14/23328 | 0.0354 | 0.0566 | 1 |
| BP | GO:0031915 | positive regulation of synaptic plasticity                                         | 1/60 | 14/23328 | 0.0354 | 0.0566 | 1 |
| BP | GO:0032494 | response to peptidoglycan                                                          | 1/60 | 14/23328 | 0.0354 | 0.0566 | 1 |
| BP | GO:0035358 | regulation of peroxisome proliferator activated receptor signaling pathway         | 1/60 | 14/23328 | 0.0354 | 0.0566 | 1 |

|    |            |                                                                            |      |          |        |        |   |
|----|------------|----------------------------------------------------------------------------|------|----------|--------|--------|---|
| BP | GO:0036498 | IRE1-mediated unfolded protein response                                    | 1/60 | 14/23328 | 0.0354 | 0.0566 | 1 |
| BP | GO:0042532 | negative regulation of tyrosine phosphorylation of STAT protein            | 1/60 | 14/23328 | 0.0354 | 0.0566 | 1 |
| BP | GO:0043558 | regulation of translational initiation in response to stress               | 1/60 | 14/23328 | 0.0354 | 0.0566 | 1 |
| BP | GO:0044804 | autophagy of nucleus                                                       | 1/60 | 14/23328 | 0.0354 | 0.0566 | 1 |
| BP | GO:0045188 | regulation of circadian sleep/wake cycle, non-REM sleep                    | 1/60 | 14/23328 | 0.0354 | 0.0566 | 1 |
| BP | GO:0046642 | negative regulation of alpha-beta T cell proliferation                     | 1/60 | 14/23328 | 0.0354 | 0.0566 | 1 |
| BP | GO:0046886 | positive regulation of hormone biosynthetic process                        | 1/60 | 14/23328 | 0.0354 | 0.0566 | 1 |
| BP | GO:0051290 | protein heterotetramerization                                              | 1/60 | 14/23328 | 0.0354 | 0.0566 | 1 |
| BP | GO:0060211 | regulation of nuclear-transcribed mRNA poly(A) tail shortening             | 1/60 | 14/23328 | 0.0354 | 0.0566 | 1 |
| BP | GO:0070365 | hepatocyte differentiation                                                 | 1/60 | 14/23328 | 0.0354 | 0.0566 | 1 |
| BP | GO:0097012 | response to granulocyte macrophage colony-stimulating factor               | 1/60 | 14/23328 | 0.0354 | 0.0566 | 1 |
| BP | GO:1903624 | regulation of DNA catabolic process                                        | 1/60 | 14/23328 | 0.0354 | 0.0566 | 1 |
| BP | GO:2000347 | positive regulation of hepatocyte proliferation                            | 1/60 | 14/23328 | 0.0354 | 0.0566 | 1 |
| BP | GO:2001279 | regulation of unsaturated fatty acid biosynthetic process                  | 1/60 | 14/23328 | 0.0354 | 0.0566 | 1 |
| BP | GO:0010958 | regulation of amino acid import across plasma membrane                     | 1/60 | 15/23328 | 0.0379 | 0.0583 | 1 |
| BP | GO:0019081 | viral translation                                                          | 1/60 | 15/23328 | 0.0379 | 0.0583 | 1 |
| BP | GO:0023035 | CD40 signaling pathway                                                     | 1/60 | 15/23328 | 0.0379 | 0.0583 | 1 |
| BP | GO:0030299 | intestinal cholesterol absorption                                          | 1/60 | 15/23328 | 0.0379 | 0.0583 | 1 |
| BP | GO:0031650 | regulation of heat generation                                              | 1/60 | 15/23328 | 0.0379 | 0.0583 | 1 |
| BP | GO:0032511 | late endosome to vacuole transport via multivesicular body sorting pathway | 1/60 | 15/23328 | 0.0379 | 0.0583 | 1 |
| BP | GO:0032530 | regulation of microvillus organization                                     | 1/60 | 15/23328 | 0.0379 | 0.0583 | 1 |
| BP | GO:0032933 | SREBP signaling pathway                                                    | 1/60 | 15/23328 | 0.0379 | 0.0583 | 1 |

|    |            |                                                                                                     |      |          |        |        |   |
|----|------------|-----------------------------------------------------------------------------------------------------|------|----------|--------|--------|---|
| BP | GO:0035745 | T-helper 2 cell cytokine production                                                                 | 1/60 | 15/23328 | 0.0379 | 0.0583 | 1 |
| BP | GO:0042748 | circadian sleep/wake cycle, non-REM sleep                                                           | 1/60 | 15/23328 | 0.0379 | 0.0583 | 1 |
| BP | GO:0042976 | activation of Janus kinase activity                                                                 | 1/60 | 15/23328 | 0.0379 | 0.0583 | 1 |
| BP | GO:0044793 | negative regulation by host of viral process                                                        | 1/60 | 15/23328 | 0.0379 | 0.0583 | 1 |
| BP | GO:0047484 | regulation of response to osmotic stress                                                            | 1/60 | 15/23328 | 0.0379 | 0.0583 | 1 |
| BP | GO:0060049 | regulation of protein glycosylation                                                                 | 1/60 | 15/23328 | 0.0379 | 0.0583 | 1 |
| BP | GO:0060396 | growth hormone receptor signaling pathway                                                           | 1/60 | 15/23328 | 0.0379 | 0.0583 | 1 |
| BP | GO:0060442 | branching involved in prostate gland morphogenesis                                                  | 1/60 | 15/23328 | 0.0379 | 0.0583 | 1 |
| BP | GO:0071280 | cellular response to copper ion                                                                     | 1/60 | 15/23328 | 0.0379 | 0.0583 | 1 |
| BP | GO:0071378 | cellular response to growth hormone stimulus                                                        | 1/60 | 15/23328 | 0.0379 | 0.0583 | 1 |
| BP | GO:0098712 | L-glutamate import across plasma membrane                                                           | 1/60 | 15/23328 | 0.0379 | 0.0583 | 1 |
| BP | GO:0099527 | postsynapse to nucleus signaling pathway                                                            | 1/60 | 15/23328 | 0.0379 | 0.0583 | 1 |
| BP | GO:1902043 | positive regulation of extrinsic apoptotic signaling pathway via death domain receptors             | 1/60 | 15/23328 | 0.0379 | 0.0583 | 1 |
| BP | GO:1902165 | regulation of intrinsic apoptotic signaling pathway in response to DNA damage by p53 class mediator | 1/60 | 15/23328 | 0.0379 | 0.0583 | 1 |
| BP | GO:1903587 | regulation of blood vessel endothelial cell proliferation involved in sprouting angiogenesis        | 1/60 | 15/23328 | 0.0379 | 0.0583 | 1 |
| BP | GO:1903789 | regulation of amino acid transmembrane transport                                                    | 1/60 | 15/23328 | 0.0379 | 0.0583 | 1 |
| BP | GO:1903799 | negative regulation of production of miRNAs involved in gene silencing by miRNA                     | 1/60 | 15/23328 | 0.0379 | 0.0583 | 1 |
| BP | GO:1904478 | regulation of intestinal absorption                                                                 | 1/60 | 15/23328 | 0.0379 | 0.0583 | 1 |
| BP | GO:0002070 | epithelial cell maturation                                                                          | 1/60 | 16/23328 | 0.0404 | 0.0594 | 1 |



|    |            |                                                                                       |      |          |        |        |   |
|----|------------|---------------------------------------------------------------------------------------|------|----------|--------|--------|---|
| BP | GO:0002295 | T-helper cell lineage commitment                                                      | 1/60 | 16/23328 | 0.0404 | 0.0594 | 1 |
| BP | GO:0002407 | dendritic cell chemotaxis                                                             | 1/60 | 16/23328 | 0.0404 | 0.0594 | 1 |
| BP | GO:0002467 | germinal center formation                                                             | 1/60 | 16/23328 | 0.0404 | 0.0594 | 1 |
| BP | GO:0002830 | positive regulation of type 2 immune response                                         | 1/60 | 16/23328 | 0.0404 | 0.0594 | 1 |
| BP | GO:0006103 | 2-oxoglutarate metabolic process                                                      | 1/60 | 16/23328 | 0.0404 | 0.0594 | 1 |
| BP | GO:0006620 | posttranslational protein targeting to endoplasmic reticulum membrane                 | 1/60 | 16/23328 | 0.0404 | 0.0594 | 1 |
| BP | GO:0006658 | phosphatidylserine metabolic process                                                  | 1/60 | 16/23328 | 0.0404 | 0.0594 | 1 |
| BP | GO:0010224 | response to UV-B                                                                      | 1/60 | 16/23328 | 0.0404 | 0.0594 | 1 |
| BP | GO:0035337 | fatty-acyl-CoA metabolic process                                                      | 1/60 | 16/23328 | 0.0404 | 0.0594 | 1 |
| BP | GO:0035590 | purinergic nucleotide receptor signaling pathway                                      | 1/60 | 16/23328 | 0.0404 | 0.0594 | 1 |
| BP | GO:0035641 | locomotory exploration behavior                                                       | 1/60 | 16/23328 | 0.0404 | 0.0594 | 1 |
| BP | GO:0042308 | negative regulation of protein import into nucleus                                    | 1/60 | 16/23328 | 0.0404 | 0.0594 | 1 |
| BP | GO:0042640 | anagen                                                                                | 1/60 | 16/23328 | 0.0404 | 0.0594 | 1 |
| BP | GO:0043518 | negative regulation of DNA damage response, signal transduction by p53 class mediator | 1/60 | 16/23328 | 0.0404 | 0.0594 | 1 |
| BP | GO:0044827 | modulation by host of viral genome replication                                        | 1/60 | 16/23328 | 0.0404 | 0.0594 | 1 |
| BP | GO:0045820 | negative regulation of glycolytic process                                             | 1/60 | 16/23328 | 0.0404 | 0.0594 | 1 |
| BP | GO:0045947 | negative regulation of translational initiation                                       | 1/60 | 16/23328 | 0.0404 | 0.0594 | 1 |
| BP | GO:0050862 | positive regulation of T cell receptor signaling pathway                              | 1/60 | 16/23328 | 0.0404 | 0.0594 | 1 |
| BP | GO:0051938 | L-glutamate import                                                                    | 1/60 | 16/23328 | 0.0404 | 0.0594 | 1 |
| BP | GO:0060100 | positive regulation of phagocytosis, engulfment                                       | 1/60 | 16/23328 | 0.0404 | 0.0594 | 1 |
| BP | GO:0070486 | leukocyte aggregation                                                                 | 1/60 | 16/23328 | 0.0404 | 0.0594 | 1 |
| BP | GO:0071243 | cellular response to arsenic-containing substance                                     | 1/60 | 16/23328 | 0.0404 | 0.0594 | 1 |

|    |            |                                                      |      |          |        |        |   |
|----|------------|------------------------------------------------------|------|----------|--------|--------|---|
| BP | GO:0071498 | cellular response to fluid shear stress              | 1/60 | 16/23328 | 0.0404 | 0.0594 | 1 |
| BP | GO:0071501 | cellular response to sterol depletion                | 1/60 | 16/23328 | 0.0404 | 0.0594 | 1 |
| BP | GO:0072537 | fibroblast activation                                | 1/60 | 16/23328 | 0.0404 | 0.0594 | 1 |
| BP | GO:0072673 | lamellipodium morphogenesis                          | 1/60 | 16/23328 | 0.0404 | 0.0594 | 1 |
| BP | GO:1904590 | negative regulation of protein import                | 1/60 | 16/23328 | 0.0404 | 0.0594 | 1 |
| BP | GO:1905155 | positive regulation of membrane invagination         | 1/60 | 16/23328 | 0.0404 | 0.0594 | 1 |
| BP | GO:2000628 | regulation of miRNA metabolic process                | 1/60 | 16/23328 | 0.0404 | 0.0594 | 1 |
| BP | GO:2001053 | regulation of mesenchymal cell apoptotic process     | 1/60 | 16/23328 | 0.0404 | 0.0594 | 1 |
| BP | GO:0006991 | response to sterol depletion                         | 1/60 | 17/23328 | 0.0429 | 0.0609 | 1 |
| BP | GO:0010713 | negative regulation of collagen metabolic process    | 1/60 | 17/23328 | 0.0429 | 0.0609 | 1 |
| BP | GO:0019048 | modulation by virus of host process                  | 1/60 | 17/23328 | 0.0429 | 0.0609 | 1 |
| BP | GO:0032225 | regulation of synaptic transmission, dopaminergic    | 1/60 | 17/23328 | 0.0429 | 0.0609 | 1 |
| BP | GO:0032306 | regulation of prostaglandin secretion                | 1/60 | 17/23328 | 0.0429 | 0.0609 | 1 |
| BP | GO:0032957 | inositol trisphosphate metabolic process             | 1/60 | 17/23328 | 0.0429 | 0.0609 | 1 |
| BP | GO:0032966 | negative regulation of collagen biosynthetic process | 1/60 | 17/23328 | 0.0429 | 0.0609 | 1 |
| BP | GO:0040015 | negative regulation of multicellular organism growth | 1/60 | 17/23328 | 0.0429 | 0.0609 | 1 |
| BP | GO:0044320 | cellular response to leptin stimulus                 | 1/60 | 17/23328 | 0.0429 | 0.0609 | 1 |
| BP | GO:0045064 | T-helper 2 cell differentiation                      | 1/60 | 17/23328 | 0.0429 | 0.0609 | 1 |
| BP | GO:0046755 | viral budding                                        | 1/60 | 17/23328 | 0.0429 | 0.0609 | 1 |
| BP | GO:0048853 | forebrain morphogenesis                              | 1/60 | 17/23328 | 0.0429 | 0.0609 | 1 |
| BP | GO:0050665 | hydrogen peroxide biosynthetic process               | 1/60 | 17/23328 | 0.0429 | 0.0609 | 1 |
| BP | GO:0051014 | actin filament severing                              | 1/60 | 17/23328 | 0.0429 | 0.0609 | 1 |
| BP | GO:0060644 | mammary gland epithelial cell differentiation        | 1/60 | 17/23328 | 0.0429 | 0.0609 | 1 |
| BP | GO:0061952 | midbody abscission                                   | 1/60 | 17/23328 | 0.0429 | 0.0609 | 1 |
| BP | GO:0070243 | regulation of thymocyte apoptotic process            | 1/60 | 17/23328 | 0.0429 | 0.0609 | 1 |

|    |            |                                                                            |      |          |        |        |   |
|----|------------|----------------------------------------------------------------------------|------|----------|--------|--------|---|
| BP | GO:0070262 | peptidyl-serine<br>dephosphorylation                                       | 1/60 | 17/23328 | 0.0429 | 0.0609 | 1 |
| BP | GO:0071636 | positive regulation of<br>transforming growth factor beta<br>production    | 1/60 | 17/23328 | 0.0429 | 0.0609 | 1 |
| BP | GO:0090336 | positive regulation of brown fat<br>cell differentiation                   | 1/60 | 17/23328 | 0.0429 | 0.0609 | 1 |
| BP | GO:0097152 | mesenchymal cell apoptotic<br>process                                      | 1/60 | 17/23328 | 0.0429 | 0.0609 | 1 |
| BP | GO:0099640 | axo-dendritic protein transport                                            | 1/60 | 17/23328 | 0.0429 | 0.0609 | 1 |
| BP | GO:1900119 | positive regulation of execution<br>phase of apoptosis                     | 1/60 | 17/23328 | 0.0429 | 0.0609 | 1 |
| BP | GO:1902894 | negative regulation of pri-<br>miRNA transcription by RNA<br>polymerase II | 1/60 | 17/23328 | 0.0429 | 0.0609 | 1 |
| BP | GO:2001028 | positive regulation of<br>endothelial cell chemotaxis                      | 1/60 | 17/23328 | 0.0429 | 0.0609 | 1 |
| BP | GO:0000188 | inactivation of MAPK activity                                              | 1/60 | 18/23328 | 0.0453 | 0.0625 | 1 |
| BP | GO:0006700 | C21-steroid hormone<br>biosynthetic process                                | 1/60 | 18/23328 | 0.0453 | 0.0625 | 1 |
| BP | GO:0010801 | negative regulation of peptidyl-<br>threonine phosphorylation              | 1/60 | 18/23328 | 0.0453 | 0.0625 | 1 |
| BP | GO:0021756 | striatum development                                                       | 1/60 | 18/23328 | 0.0453 | 0.0625 | 1 |
| BP | GO:0030033 | microvillus assembly                                                       | 1/60 | 18/23328 | 0.0453 | 0.0625 | 1 |
| BP | GO:0033631 | cell-cell adhesion mediated by<br>integrin                                 | 1/60 | 18/23328 | 0.0453 | 0.0625 | 1 |
| BP | GO:0035633 | maintenance of blood-brain<br>barrier                                      | 1/60 | 18/23328 | 0.0453 | 0.0625 | 1 |
| BP | GO:0042026 | protein refolding                                                          | 1/60 | 18/23328 | 0.0453 | 0.0625 | 1 |
| BP | GO:0042448 | progesterone metabolic process                                             | 1/60 | 18/23328 | 0.0453 | 0.0625 | 1 |
| BP | GO:0044241 | lipid digestion                                                            | 1/60 | 18/23328 | 0.0453 | 0.0625 | 1 |
| BP | GO:0050710 | negative regulation of cytokine<br>secretion                               | 1/60 | 18/23328 | 0.0453 | 0.0625 | 1 |
| BP | GO:0060416 | response to growth hormone                                                 | 1/60 | 18/23328 | 0.0453 | 0.0625 | 1 |
| BP | GO:0060576 | intestinal epithelial cell<br>development                                  | 1/60 | 18/23328 | 0.0453 | 0.0625 | 1 |
| BP | GO:0061158 | 3'-UTR-mediated mRNA<br>destabilization                                    | 1/60 | 18/23328 | 0.0453 | 0.0625 | 1 |
| BP | GO:0070102 | interleukin-6-mediated<br>signaling pathway                                | 1/60 | 18/23328 | 0.0453 | 0.0625 | 1 |
| BP | GO:0098856 | intestinal lipid absorption                                                | 1/60 | 18/23328 | 0.0453 | 0.0625 | 1 |

|    |            |                                                                                                  |      |          |        |        |   |
|----|------------|--------------------------------------------------------------------------------------------------|------|----------|--------|--------|---|
| BP | GO:1900153 | positive regulation of nuclear-transcribed mRNA catabolic process, deadenylation-dependent decay | 1/60 | 18/23328 | 0.0453 | 0.0625 | 1 |
| BP | GO:1901673 | regulation of mitotic spindle assembly                                                           | 1/60 | 18/23328 | 0.0453 | 0.0625 | 1 |
| BP | GO:1904706 | negative regulation of vascular associated smooth muscle cell proliferation                      | 1/60 | 18/23328 | 0.0453 | 0.0625 | 1 |
| BP | GO:1990000 | amyloid fibril formation                                                                         | 1/60 | 18/23328 | 0.0453 | 0.0625 | 1 |
| BP | GO:0002544 | chronic inflammatory response                                                                    | 1/60 | 19/23328 | 0.0478 | 0.0639 | 1 |
| BP | GO:0002726 | positive regulation of T cell cytokine production                                                | 1/60 | 19/23328 | 0.0478 | 0.0639 | 1 |
| BP | GO:0006027 | glycosaminoglycan catabolic process                                                              | 1/60 | 19/23328 | 0.0478 | 0.0639 | 1 |
| BP | GO:0006089 | lactate metabolic process                                                                        | 1/60 | 19/23328 | 0.0478 | 0.0639 | 1 |
| BP | GO:0006309 | apoptotic DNA fragmentation                                                                      | 1/60 | 19/23328 | 0.0478 | 0.0639 | 1 |
| BP | GO:0006622 | protein targeting to lysosome                                                                    | 1/60 | 19/23328 | 0.0478 | 0.0639 | 1 |
| BP | GO:0006656 | phosphatidylcholine biosynthetic process                                                         | 1/60 | 19/23328 | 0.0478 | 0.0639 | 1 |
| BP | GO:0017121 | plasma membrane phospholipid scrambling                                                          | 1/60 | 19/23328 | 0.0478 | 0.0639 | 1 |
| BP | GO:0020027 | hemoglobin metabolic process                                                                     | 1/60 | 19/23328 | 0.0478 | 0.0639 | 1 |
| BP | GO:0030502 | negative regulation of bone mineralization                                                       | 1/60 | 19/23328 | 0.0478 | 0.0639 | 1 |
| BP | GO:0032352 | positive regulation of hormone metabolic process                                                 | 1/60 | 19/23328 | 0.0478 | 0.0639 | 1 |
| BP | GO:0034138 | toll-like receptor 3 signaling pathway                                                           | 1/60 | 19/23328 | 0.0478 | 0.0639 | 1 |
| BP | GO:0035994 | response to muscle stretch                                                                       | 1/60 | 19/23328 | 0.0478 | 0.0639 | 1 |
| BP | GO:0043373 | CD4-positive, alpha-beta T cell lineage commitment                                               | 1/60 | 19/23328 | 0.0478 | 0.0639 | 1 |
| BP | GO:0043652 | engulfment of apoptotic cell                                                                     | 1/60 | 19/23328 | 0.0478 | 0.0639 | 1 |
| BP | GO:0045721 | negative regulation of gluconeogenesis                                                           | 1/60 | 19/23328 | 0.0478 | 0.0639 | 1 |
| BP | GO:0045837 | negative regulation of membrane potential                                                        | 1/60 | 19/23328 | 0.0478 | 0.0639 | 1 |
| BP | GO:0060965 | negative regulation of gene silencing by miRNA                                                   | 1/60 | 19/23328 | 0.0478 | 0.0639 | 1 |
| BP | GO:0071071 | regulation of phospholipid biosynthetic process                                                  | 1/60 | 19/23328 | 0.0478 | 0.0639 | 1 |

|    |            |                                                                                                     |      |          |        |        |   |
|----|------------|-----------------------------------------------------------------------------------------------------|------|----------|--------|--------|---|
| BP | GO:0072578 | neurotransmitter-gated ion channel clustering                                                       | 1/60 | 19/23328 | 0.0478 | 0.0639 | 1 |
| BP | GO:0097623 | potassium ion export across plasma membrane                                                         | 1/60 | 19/23328 | 0.0478 | 0.0639 | 1 |
| BP | GO:1903599 | positive regulation of autophagy of mitochondrion                                                   | 1/60 | 19/23328 | 0.0478 | 0.0639 | 1 |
| BP | GO:1903960 | negative regulation of anion transmembrane transport                                                | 1/60 | 19/23328 | 0.0478 | 0.0639 | 1 |
| BP | GO:0008209 | androgen metabolic process regulation of                                                            | 1/60 | 20/23328 | 0.0502 | 0.0657 | 1 |
| BP | GO:0031664 | lipopolysaccharide-mediated signaling pathway                                                       | 1/60 | 20/23328 | 0.0502 | 0.0657 | 1 |
| BP | GO:0032095 | regulation of response to food                                                                      | 1/60 | 20/23328 | 0.0502 | 0.0657 | 1 |
| BP | GO:0032310 | prostaglandin secretion                                                                             | 1/60 | 20/23328 | 0.0502 | 0.0657 | 1 |
| BP | GO:0035970 | peptidyl-threonine dephosphorylation                                                                | 1/60 | 20/23328 | 0.0502 | 0.0657 | 1 |
| BP | GO:0043555 | regulation of translation in response to stress                                                     | 1/60 | 20/23328 | 0.0502 | 0.0657 | 1 |
| BP | GO:0044321 | response to leptin                                                                                  | 1/60 | 20/23328 | 0.0502 | 0.0657 | 1 |
| BP | GO:0045986 | negative regulation of smooth muscle contraction                                                    | 1/60 | 20/23328 | 0.0502 | 0.0657 | 1 |
| BP | GO:0060252 | positive regulation of glial cell proliferation                                                     | 1/60 | 20/23328 | 0.0502 | 0.0657 | 1 |
| BP | GO:0060547 | negative regulation of necrotic cell death                                                          | 1/60 | 20/23328 | 0.0502 | 0.0657 | 1 |
| BP | GO:0070935 | 3'-UTR-mediated mRNA stabilization                                                                  | 1/60 | 20/23328 | 0.0502 | 0.0657 | 1 |
| BP | GO:1900151 | regulation of nuclear-transcribed mRNA catabolic process, deadenylation-dependent decay             | 1/60 | 20/23328 | 0.0502 | 0.0657 | 1 |
| BP | GO:1901028 | regulation of mitochondrial outer membrane permeabilization involved in apoptotic signaling pathway | 1/60 | 20/23328 | 0.0502 | 0.0657 | 1 |
| BP | GO:1903909 | regulation of receptor clustering                                                                   | 1/60 | 20/23328 | 0.0502 | 0.0657 | 1 |
| BP | GO:1904385 | cellular response to angiotensin blood vessel endothelial cell                                      | 1/60 | 20/23328 | 0.0502 | 0.0657 | 1 |
| BP | GO:0002043 | proliferation involved in sprouting angiogenesis                                                    | 1/60 | 21/23328 | 0.0527 | 0.0671 | 1 |
| BP | GO:0002363 | alpha-beta T cell lineage commitment                                                                | 1/60 | 21/23328 | 0.0527 | 0.0671 | 1 |

|    |            |                                                                                    |      |          |        |        |   |
|----|------------|------------------------------------------------------------------------------------|------|----------|--------|--------|---|
| BP | GO:0010869 | regulation of receptor biosynthetic process                                        | 1/60 | 21/23328 | 0.0527 | 0.0671 | 1 |
| BP | GO:0031065 | positive regulation of histone deacetylation                                       | 1/60 | 21/23328 | 0.0527 | 0.0671 | 1 |
| BP | GO:0032332 | positive regulation of chondrocyte differentiation                                 | 1/60 | 21/23328 | 0.0527 | 0.0671 | 1 |
| BP | GO:0034643 | establishment of mitochondrion localization, microtubule-mediated                  | 1/60 | 21/23328 | 0.0527 | 0.0671 | 1 |
| BP | GO:0036336 | dendritic cell migration                                                           | 1/60 | 21/23328 | 0.0527 | 0.0671 | 1 |
| BP | GO:0043931 | ossification involved in bone maturation                                           | 1/60 | 21/23328 | 0.0527 | 0.0671 | 1 |
| BP | GO:0045948 | positive regulation of translational initiation                                    | 1/60 | 21/23328 | 0.0527 | 0.0671 | 1 |
| BP | GO:0046697 | decidualization                                                                    | 1/60 | 21/23328 | 0.0527 | 0.0671 | 1 |
| BP | GO:0047497 | mitochondrion transport along microtubule                                          | 1/60 | 21/23328 | 0.0527 | 0.0671 | 1 |
| BP | GO:0051023 | regulation of immunoglobulin secretion                                             | 1/60 | 21/23328 | 0.0527 | 0.0671 | 1 |
| BP | GO:0051956 | negative regulation of amino acid transport                                        | 1/60 | 21/23328 | 0.0527 | 0.0671 | 1 |
| BP | GO:0060149 | negative regulation of posttranscriptional gene silencing                          | 1/60 | 21/23328 | 0.0527 | 0.0671 | 1 |
| BP | GO:0060456 | positive regulation of digestive system process                                    | 1/60 | 21/23328 | 0.0527 | 0.0671 | 1 |
| BP | GO:0060967 | negative regulation of gene silencing by RNA                                       | 1/60 | 21/23328 | 0.0527 | 0.0671 | 1 |
| BP | GO:0090026 | positive regulation of monocyte chemotaxis                                         | 1/60 | 21/23328 | 0.0527 | 0.0671 | 1 |
| BP | GO:1902004 | positive regulation of amyloid-beta formation                                      | 1/60 | 21/23328 | 0.0527 | 0.0671 | 1 |
| BP | GO:1902254 | negative regulation of intrinsic apoptotic signaling pathway by p53 class mediator | 1/60 | 21/23328 | 0.0527 | 0.0671 | 1 |
| BP | GO:2000726 | negative regulation of cardiac muscle cell differentiation                         | 1/60 | 21/23328 | 0.0527 | 0.0671 | 1 |
| BP | GO:0003323 | type B pancreatic cell development                                                 | 1/60 | 22/23328 | 0.0551 | 0.0683 | 1 |
| BP | GO:0014850 | response to muscle activity                                                        | 1/60 | 22/23328 | 0.0551 | 0.0683 | 1 |
| BP | GO:0015813 | L-glutamate transmembrane transport                                                | 1/60 | 22/23328 | 0.0551 | 0.0683 | 1 |

|    |            |                                                                        |      |          |        |        |   |
|----|------------|------------------------------------------------------------------------|------|----------|--------|--------|---|
| BP | GO:0031649 | heat generation                                                        | 1/60 | 22/23328 | 0.0551 | 0.0683 | 1 |
| BP | GO:0032366 | intracellular sterol transport                                         | 1/60 | 22/23328 | 0.0551 | 0.0683 | 1 |
| BP | GO:0032367 | intracellular cholesterol transport                                    | 1/60 | 22/23328 | 0.0551 | 0.0683 | 1 |
| BP | GO:0034377 | plasma lipoprotein particle assembly                                   | 1/60 | 22/23328 | 0.0551 | 0.0683 | 1 |
| BP | GO:0042438 | melanin biosynthetic process                                           | 1/60 | 22/23328 | 0.0551 | 0.0683 | 1 |
| BP | GO:0044273 | sulfur compound catabolic process                                      | 1/60 | 22/23328 | 0.0551 | 0.0683 | 1 |
| BP | GO:0044851 | hair cycle phase                                                       | 1/60 | 22/23328 | 0.0551 | 0.0683 | 1 |
| BP | GO:0045624 | positive regulation of T-helper cell differentiation                   | 1/60 | 22/23328 | 0.0551 | 0.0683 | 1 |
| BP | GO:0046337 | phosphatidylethanolamine metabolic process                             | 1/60 | 22/23328 | 0.0551 | 0.0683 | 1 |
| BP | GO:0048532 | anatomical structure arrangement                                       | 1/60 | 22/23328 | 0.0551 | 0.0683 | 1 |
| BP | GO:0060749 | mammary gland alveolus development                                     | 1/60 | 22/23328 | 0.0551 | 0.0683 | 1 |
| BP | GO:0061377 | mammary gland lobule development                                       | 1/60 | 22/23328 | 0.0551 | 0.0683 | 1 |
| BP | GO:0070242 | thymocyte apoptotic process                                            | 1/60 | 22/23328 | 0.0551 | 0.0683 | 1 |
| BP | GO:1900543 | negative regulation of purine nucleotide metabolic process             | 1/60 | 22/23328 | 0.0551 | 0.0683 | 1 |
| BP | GO:1901223 | negative regulation of NIK/NF-kappaB signaling                         | 1/60 | 22/23328 | 0.0551 | 0.0683 | 1 |
| BP | GO:1901741 | positive regulation of myoblast fusion                                 | 1/60 | 22/23328 | 0.0551 | 0.0683 | 1 |
| BP | GO:1903055 | positive regulation of extracellular matrix organization               | 1/60 | 22/23328 | 0.0551 | 0.0683 | 1 |
| BP | GO:1990776 | response to angiotensin                                                | 1/60 | 22/23328 | 0.0551 | 0.0683 | 1 |
| BP | GO:2000353 | positive regulation of endothelial cell apoptotic process              | 1/60 | 22/23328 | 0.0551 | 0.0683 | 1 |
| BP | GO:2001026 | regulation of endothelial cell chemotaxis                              | 1/60 | 22/23328 | 0.0551 | 0.0683 | 1 |
| BP | GO:0002719 | negative regulation of cytokine production involved in immune response | 1/60 | 23/23328 | 0.0575 | 0.0700 | 1 |
| BP | GO:0023019 | signal transduction involved in regulation of gene expression          | 1/60 | 23/23328 | 0.0575 | 0.0700 | 1 |
| BP | GO:0034405 | response to fluid shear stress                                         | 1/60 | 23/23328 | 0.0575 | 0.0700 | 1 |

|    |            |                                                                                  |      |          |        |        |   |
|----|------------|----------------------------------------------------------------------------------|------|----------|--------|--------|---|
| BP | GO:0035278 | miRNA mediated inhibition of translation                                         | 1/60 | 23/23328 | 0.0575 | 0.0700 | 1 |
| BP | GO:0043369 | CD4-positive or CD8-positive, alpha-beta T cell lineage commitment               | 1/60 | 23/23328 | 0.0575 | 0.0700 | 1 |
| BP | GO:0045980 | negative regulation of nucleotide metabolic process                              | 1/60 | 23/23328 | 0.0575 | 0.0700 | 1 |
| BP | GO:0046931 | pore complex assembly                                                            | 1/60 | 23/23328 | 0.0575 | 0.0700 | 1 |
| BP | GO:0050857 | positive regulation of antigen receptor-mediated signaling pathway               | 1/60 | 23/23328 | 0.0575 | 0.0700 | 1 |
| BP | GO:0051291 | protein heterooligomerization                                                    | 1/60 | 23/23328 | 0.0575 | 0.0700 | 1 |
| BP | GO:0051969 | regulation of transmission of nerve impulse                                      | 1/60 | 23/23328 | 0.0575 | 0.0700 | 1 |
| BP | GO:0070977 | bone maturation                                                                  | 1/60 | 23/23328 | 0.0575 | 0.0700 | 1 |
| BP | GO:1901626 | regulation of postsynaptic membrane organization                                 | 1/60 | 23/23328 | 0.0575 | 0.0700 | 1 |
| BP | GO:1902410 | mitotic cytokinetic process                                                      | 1/60 | 23/23328 | 0.0575 | 0.0700 | 1 |
| BP | GO:1903306 | negative regulation of regulated secretory pathway                               | 1/60 | 23/23328 | 0.0575 | 0.0700 | 1 |
| BP | GO:2000345 | regulation of hepatocyte proliferation                                           | 1/60 | 23/23328 | 0.0575 | 0.0700 | 1 |
| BP | GO:0002903 | negative regulation of B cell apoptotic process                                  | 1/60 | 24/23328 | 0.0600 | 0.0717 | 1 |
| BP | GO:0006582 | melanin metabolic process                                                        | 1/60 | 24/23328 | 0.0600 | 0.0717 | 1 |
| BP | GO:0015732 | prostaglandin transport                                                          | 1/60 | 24/23328 | 0.0600 | 0.0717 | 1 |
| BP | GO:0021544 | subpallium development                                                           | 1/60 | 24/23328 | 0.0600 | 0.0717 | 1 |
| BP | GO:0030728 | ovulation                                                                        | 1/60 | 24/23328 | 0.0600 | 0.0717 | 1 |
| BP | GO:0032691 | negative regulation of interleukin-1 beta production                             | 1/60 | 24/23328 | 0.0600 | 0.0717 | 1 |
| BP | GO:0035743 | CD4-positive, alpha-beta T cell cytokine production                              | 1/60 | 24/23328 | 0.0600 | 0.0717 | 1 |
| BP | GO:0040033 | negative regulation of translation, ncRNA-mediated                               | 1/60 | 24/23328 | 0.0600 | 0.0717 | 1 |
| BP | GO:0044550 | secondary metabolite biosynthetic process                                        | 1/60 | 24/23328 | 0.0600 | 0.0717 | 1 |
| BP | GO:0045324 | late endosome to vacuole transport                                               | 1/60 | 24/23328 | 0.0600 | 0.0717 | 1 |
| BP | GO:0045736 | negative regulation of cyclin-dependent protein serine/threonine kinase activity | 1/60 | 24/23328 | 0.0600 | 0.0717 | 1 |



|    |            |                                                                                              |      |          |        |        |   |
|----|------------|----------------------------------------------------------------------------------------------|------|----------|--------|--------|---|
| BP | GO:0045974 | regulation of translation,<br>ncRNA-mediated                                                 | 1/60 | 24/23328 | 0.0600 | 0.0717 | 1 |
| BP | GO:0046823 | negative regulation of<br>nucleocytoplasmic transport                                        | 1/60 | 24/23328 | 0.0600 | 0.0717 | 1 |
| BP | GO:0048670 | regulation of collateral<br>sprouting                                                        | 1/60 | 24/23328 | 0.0600 | 0.0717 | 1 |
| BP | GO:0051654 | establishment of mitochondrion<br>localization                                               | 1/60 | 24/23328 | 0.0600 | 0.0717 | 1 |
| BP | GO:0090335 | regulation of brown fat cell<br>differentiation                                              | 1/60 | 24/23328 | 0.0600 | 0.0717 | 1 |
| BP | GO:0010884 | positive regulation of lipid<br>storage                                                      | 1/60 | 25/23328 | 0.0624 | 0.0732 | 1 |
| BP | GO:0010954 | positive regulation of protein<br>processing                                                 | 1/60 | 25/23328 | 0.0624 | 0.0732 | 1 |
| BP | GO:0019068 | virion assembly                                                                              | 1/60 | 25/23328 | 0.0624 | 0.0732 | 1 |
| BP | GO:0032753 | positive regulation of<br>interleukin-4 production                                           | 1/60 | 25/23328 | 0.0624 | 0.0732 | 1 |
| BP | GO:0032897 | negative regulation of viral<br>transcription                                                | 1/60 | 25/23328 | 0.0624 | 0.0732 | 1 |
| BP | GO:0035384 | thioester biosynthetic process                                                               | 1/60 | 25/23328 | 0.0624 | 0.0732 | 1 |
| BP | GO:0046426 | negative regulation of receptor<br>signaling pathway via JAK-<br>STAT                        | 1/60 | 25/23328 | 0.0624 | 0.0732 | 1 |
| BP | GO:0046688 | response to copper ion                                                                       | 1/60 | 25/23328 | 0.0624 | 0.0732 | 1 |
| BP | GO:0060575 | intestinal epithelial cell<br>differentiation                                                | 1/60 | 25/23328 | 0.0624 | 0.0732 | 1 |
| BP | GO:0070633 | transepithelial transport                                                                    | 1/60 | 25/23328 | 0.0624 | 0.0732 | 1 |
| BP | GO:0071108 | protein K48-linked<br>deubiquitination                                                       | 1/60 | 25/23328 | 0.0624 | 0.0732 | 1 |
| BP | GO:0071616 | acyl-CoA biosynthetic process                                                                | 1/60 | 25/23328 | 0.0624 | 0.0732 | 1 |
| BP | GO:0090169 | regulation of spindle assembly                                                               | 1/60 | 25/23328 | 0.0624 | 0.0732 | 1 |
| BP | GO:1901739 | regulation of myoblast fusion                                                                | 1/60 | 25/23328 | 0.0624 | 0.0732 | 1 |
| BP | GO:1902230 | negative regulation of intrinsic<br>apoptotic signaling pathway in<br>response to DNA damage | 1/60 | 25/23328 | 0.0624 | 0.0732 | 1 |
| BP | GO:1902993 | positive regulation of amyloid<br>precursor protein catabolic<br>process                     | 1/60 | 25/23328 | 0.0624 | 0.0732 | 1 |
| BP | GO:1903798 | regulation of production of<br>miRNAs involved in gene<br>silencing by miRNA                 | 1/60 | 25/23328 | 0.0624 | 0.0732 | 1 |

|    |            |                                                                         |      |          |        |        |   |
|----|------------|-------------------------------------------------------------------------|------|----------|--------|--------|---|
| BP | GO:1905208 | negative regulation of cardiocyte differentiation                       | 1/60 | 25/23328 | 0.0624 | 0.0732 | 1 |
| BP | GO:0000289 | nuclear-transcribed mRNA poly(A) tail shortening                        | 1/60 | 26/23328 | 0.0648 | 0.0749 | 1 |
| BP | GO:0000737 | DNA catabolic process, endonucleolytic                                  | 1/60 | 26/23328 | 0.0648 | 0.0749 | 1 |
| BP | GO:0032104 | regulation of response to extracellular stimulus                        | 1/60 | 26/23328 | 0.0648 | 0.0749 | 1 |
| BP | GO:0032107 | regulation of response to nutrient levels                               | 1/60 | 26/23328 | 0.0648 | 0.0749 | 1 |
| BP | GO:0032303 | regulation of icosanoid secretion                                       | 1/60 | 26/23328 | 0.0648 | 0.0749 | 1 |
| BP | GO:0032800 | receptor biosynthetic process                                           | 1/60 | 26/23328 | 0.0648 | 0.0749 | 1 |
| BP | GO:0065005 | protein-lipid complex assembly                                          | 1/60 | 26/23328 | 0.0648 | 0.0749 | 1 |
| BP | GO:0070168 | negative regulation of biomineral tissue development                    | 1/60 | 26/23328 | 0.0648 | 0.0749 | 1 |
| BP | GO:0070233 | negative regulation of T cell apoptotic process                         | 1/60 | 26/23328 | 0.0648 | 0.0749 | 1 |
| BP | GO:0070920 | regulation of production of small RNA involved in gene silencing by RNA | 1/60 | 26/23328 | 0.0648 | 0.0749 | 1 |
| BP | GO:0071549 | cellular response to dexamethasone stimulus                             | 1/60 | 26/23328 | 0.0648 | 0.0749 | 1 |
| BP | GO:0110150 | negative regulation of biomineralization                                | 1/60 | 26/23328 | 0.0648 | 0.0749 | 1 |
| BP | GO:1901380 | negative regulation of potassium ion transmembrane transport            | 1/60 | 26/23328 | 0.0648 | 0.0749 | 1 |
| BP | GO:1904030 | negative regulation of cyclin-dependent protein kinase activity         | 1/60 | 26/23328 | 0.0648 | 0.0749 | 1 |
| BP | GO:1904893 | negative regulation of receptor signaling pathway via STAT              | 1/60 | 26/23328 | 0.0648 | 0.0749 | 1 |
| BP | GO:0002052 | positive regulation of neuroblast proliferation                         | 1/60 | 27/23328 | 0.0672 | 0.0760 | 1 |
| BP | GO:0002068 | glandular epithelial cell development                                   | 1/60 | 27/23328 | 0.0672 | 0.0760 | 1 |
| BP | GO:0006882 | cellular zinc ion homeostasis                                           | 1/60 | 27/23328 | 0.0672 | 0.0760 | 1 |
| BP | GO:0030194 | positive regulation of blood coagulation                                | 1/60 | 27/23328 | 0.0672 | 0.0760 | 1 |
| BP | GO:0030212 | hyaluronan metabolic process                                            | 1/60 | 27/23328 | 0.0672 | 0.0760 | 1 |
| BP | GO:0032528 | microvillus organization                                                | 1/60 | 27/23328 | 0.0672 | 0.0760 | 1 |

|    |            |                                                                              |      |          |        |        |   |
|----|------------|------------------------------------------------------------------------------|------|----------|--------|--------|---|
| BP | GO:0046885 | regulation of hormone biosynthetic process                                   | 1/60 | 27/23328 | 0.0672 | 0.0760 | 1 |
| BP | GO:0048305 | immunoglobulin secretion                                                     | 1/60 | 27/23328 | 0.0672 | 0.0760 | 1 |
| BP | GO:0048799 | animal organ maturation                                                      | 1/60 | 27/23328 | 0.0672 | 0.0760 | 1 |
| BP | GO:0051443 | positive regulation of ubiquitin-protein transferase activity                | 1/60 | 27/23328 | 0.0672 | 0.0760 | 1 |
| BP | GO:0060343 | trabecula formation                                                          | 1/60 | 27/23328 | 0.0672 | 0.0760 | 1 |
| BP | GO:0061298 | retina vasculature development in camera-type eye                            | 1/60 | 27/23328 | 0.0672 | 0.0760 | 1 |
| BP | GO:0071677 | positive regulation of mononuclear cell migration                            | 1/60 | 27/23328 | 0.0672 | 0.0760 | 1 |
| BP | GO:0090103 | cochlea morphogenesis                                                        | 1/60 | 27/23328 | 0.0672 | 0.0760 | 1 |
| BP | GO:0150077 | regulation of neuroinflammatory response                                     | 1/60 | 27/23328 | 0.0672 | 0.0760 | 1 |
| BP | GO:1900017 | positive regulation of cytokine production involved in inflammatory response | 1/60 | 27/23328 | 0.0672 | 0.0760 | 1 |
| BP | GO:1900048 | positive regulation of hemostasis                                            | 1/60 | 27/23328 | 0.0672 | 0.0760 | 1 |
| BP | GO:1903319 | positive regulation of protein maturation                                    | 1/60 | 27/23328 | 0.0672 | 0.0760 | 1 |
| BP | GO:0006026 | aminoglycan catabolic process                                                | 1/60 | 28/23328 | 0.0696 | 0.0775 | 1 |
| BP | GO:0010460 | positive regulation of heart rate                                            | 1/60 | 28/23328 | 0.0696 | 0.0775 | 1 |
| BP | GO:0030878 | thyroid gland development                                                    | 1/60 | 28/23328 | 0.0696 | 0.0775 | 1 |
| BP | GO:0033233 | regulation of protein sumoylation                                            | 1/60 | 28/23328 | 0.0696 | 0.0775 | 1 |
| BP | GO:0045648 | positive regulation of erythrocyte differentiation                           | 1/60 | 28/23328 | 0.0696 | 0.0775 | 1 |
| BP | GO:0045922 | negative regulation of fatty acid metabolic process                          | 1/60 | 28/23328 | 0.0696 | 0.0775 | 1 |
| BP | GO:0048596 | embryonic camera-type eye morphogenesis                                      | 1/60 | 28/23328 | 0.0696 | 0.0775 | 1 |
| BP | GO:0048820 | hair follicle maturation                                                     | 1/60 | 28/23328 | 0.0696 | 0.0775 | 1 |
| BP | GO:0051016 | barbed-end actin filament capping                                            | 1/60 | 28/23328 | 0.0696 | 0.0775 | 1 |
| BP | GO:0055069 | zinc ion homeostasis                                                         | 1/60 | 28/23328 | 0.0696 | 0.0775 | 1 |
| BP | GO:0060445 | branching involved in salivary gland morphogenesis                           | 1/60 | 28/23328 | 0.0696 | 0.0775 | 1 |
| BP | GO:0061436 | establishment of skin barrier                                                | 1/60 | 28/23328 | 0.0696 | 0.0775 | 1 |
| BP | GO:0071480 | cellular response to gamma radiation                                         | 1/60 | 28/23328 | 0.0696 | 0.0775 | 1 |

|    |            |                                                                       |      |          |        |        |   |
|----|------------|-----------------------------------------------------------------------|------|----------|--------|--------|---|
| BP | GO:0001516 | prostaglandin biosynthetic process                                    | 1/60 | 29/23328 | 0.0720 | 0.0785 | 1 |
| BP | GO:0001919 | regulation of receptor recycling                                      | 1/60 | 29/23328 | 0.0720 | 0.0785 | 1 |
| BP | GO:0002507 | tolerance induction                                                   | 1/60 | 29/23328 | 0.0720 | 0.0785 | 1 |
| BP | GO:0010586 | miRNA metabolic process                                               | 1/60 | 29/23328 | 0.0720 | 0.0785 | 1 |
| BP | GO:0010893 | positive regulation of steroid biosynthetic process                   | 1/60 | 29/23328 | 0.0720 | 0.0785 | 1 |
| BP | GO:0030262 | apoptotic nuclear changes                                             | 1/60 | 29/23328 | 0.0720 | 0.0785 | 1 |
| BP | GO:0031063 | regulation of histone deacetylation                                   | 1/60 | 29/23328 | 0.0720 | 0.0785 | 1 |
| BP | GO:0031295 | T cell costimulation                                                  | 1/60 | 29/23328 | 0.0720 | 0.0785 | 1 |
| BP | GO:0042403 | thyroid hormone metabolic process                                     | 1/60 | 29/23328 | 0.0720 | 0.0785 | 1 |
| BP | GO:0043032 | positive regulation of macrophage activation                          | 1/60 | 29/23328 | 0.0720 | 0.0785 | 1 |
| BP | GO:0045109 | intermediate filament organization                                    | 1/60 | 29/23328 | 0.0720 | 0.0785 | 1 |
| BP | GO:0045187 | regulation of circadian sleep/wake cycle, sleep                       | 1/60 | 29/23328 | 0.0720 | 0.0785 | 1 |
| BP | GO:0045589 | regulation of regulatory T cell differentiation                       | 1/60 | 29/23328 | 0.0720 | 0.0785 | 1 |
| BP | GO:0046457 | prostanoid biosynthetic process                                       | 1/60 | 29/23328 | 0.0720 | 0.0785 | 1 |
| BP | GO:0060571 | morphogenesis of an epithelial fold                                   | 1/60 | 29/23328 | 0.0720 | 0.0785 | 1 |
| BP | GO:0061050 | regulation of cell growth involved in cardiac muscle cell development | 1/60 | 29/23328 | 0.0720 | 0.0785 | 1 |
| BP | GO:0071353 | cellular response to interleukin-4                                    | 1/60 | 29/23328 | 0.0720 | 0.0785 | 1 |
| BP | GO:0071548 | response to dexamethasone                                             | 1/60 | 29/23328 | 0.0720 | 0.0785 | 1 |
| BP | GO:0090312 | positive regulation of protein deacetylation                          | 1/60 | 29/23328 | 0.0720 | 0.0785 | 1 |
| BP | GO:0097345 | mitochondrial outer membrane permeabilization                         | 1/60 | 29/23328 | 0.0720 | 0.0785 | 1 |
| BP | GO:0002360 | T cell lineage commitment                                             | 1/60 | 30/23328 | 0.0744 | 0.0797 | 1 |
| BP | GO:0002724 | regulation of T cell cytokine production                              | 1/60 | 30/23328 | 0.0744 | 0.0797 | 1 |
| BP | GO:0003309 | type B pancreatic cell differentiation                                | 1/60 | 30/23328 | 0.0744 | 0.0797 | 1 |
| BP | GO:0006767 | water-soluble vitamin metabolic process                               | 1/60 | 30/23328 | 0.0744 | 0.0797 | 1 |
| BP | GO:0006829 | zinc ion transport                                                    | 1/60 | 30/23328 | 0.0744 | 0.0797 | 1 |

|    |            |                                                                             |      |          |        |        |   |
|----|------------|-----------------------------------------------------------------------------|------|----------|--------|--------|---|
|    |            | cellular component disassembly                                              |      |          |        |        |   |
| BP | GO:0006921 | involved in execution phase of apoptosis                                    | 1/60 | 30/23328 | 0.0744 | 0.0797 | 1 |
| BP | GO:0009262 | deoxyribonucleotide metabolic process                                       | 1/60 | 30/23328 | 0.0744 | 0.0797 | 1 |
| BP | GO:0030947 | regulation of vascular endothelial growth factor receptor signaling pathway | 1/60 | 30/23328 | 0.0744 | 0.0797 | 1 |
| BP | GO:0035162 | embryonic hemopoiesis                                                       | 1/60 | 30/23328 | 0.0744 | 0.0797 | 1 |
| BP | GO:0035767 | endothelial cell chemotaxis                                                 | 1/60 | 30/23328 | 0.0744 | 0.0797 | 1 |
| BP | GO:0043372 | positive regulation of CD4-positive, alpha-beta T cell differentiation      | 1/60 | 30/23328 | 0.0744 | 0.0797 | 1 |
| BP | GO:0043457 | regulation of cellular respiration                                          | 1/60 | 30/23328 | 0.0744 | 0.0797 | 1 |
| BP | GO:0050802 | circadian sleep/wake cycle, sleep                                           | 1/60 | 30/23328 | 0.0744 | 0.0797 | 1 |
| BP | GO:0050820 | positive regulation of coagulation                                          | 1/60 | 30/23328 | 0.0744 | 0.0797 | 1 |
| BP | GO:0051085 | chaperone cofactor-dependent protein refolding                              | 1/60 | 30/23328 | 0.0744 | 0.0797 | 1 |
| BP | GO:0060143 | positive regulation of syncytium formation by plasma membrane fusion        | 1/60 | 30/23328 | 0.0744 | 0.0797 | 1 |
| BP | GO:0061082 | myeloid leukocyte cytokine production                                       | 1/60 | 30/23328 | 0.0744 | 0.0797 | 1 |
| BP | GO:0072539 | T-helper 17 cell differentiation                                            | 1/60 | 30/23328 | 0.0744 | 0.0797 | 1 |
| BP | GO:0120178 | steroid hormone biosynthetic process                                        | 1/60 | 30/23328 | 0.0744 | 0.0797 | 1 |
| BP | GO:1903579 | negative regulation of ATP metabolic process                                | 1/60 | 30/23328 | 0.0744 | 0.0797 | 1 |
| BP | GO:0001963 | synaptic transmission, dopaminergic                                         | 1/60 | 31/23328 | 0.0768 | 0.0809 | 1 |
| BP | GO:0002230 | positive regulation of defense response to virus by host                    | 1/60 | 31/23328 | 0.0768 | 0.0809 | 1 |
| BP | GO:0002828 | regulation of type 2 immune response                                        | 1/60 | 31/23328 | 0.0768 | 0.0809 | 1 |
| BP | GO:0031294 | lymphocyte costimulation                                                    | 1/60 | 31/23328 | 0.0768 | 0.0809 | 1 |
| BP | GO:0032365 | intracellular lipid transport                                               | 1/60 | 31/23328 | 0.0768 | 0.0809 | 1 |
| BP | GO:0033137 | negative regulation of peptidyl-serine phosphorylation                      | 1/60 | 31/23328 | 0.0768 | 0.0809 | 1 |
| BP | GO:0035640 | exploration behavior                                                        | 1/60 | 31/23328 | 0.0768 | 0.0809 | 1 |
| BP | GO:0042168 | heme metabolic process                                                      | 1/60 | 31/23328 | 0.0768 | 0.0809 | 1 |

|    |            |                                                                           |      |          |        |        |   |
|----|------------|---------------------------------------------------------------------------|------|----------|--------|--------|---|
| BP | GO:0044319 | wound healing, spreading of cells                                         | 1/60 | 31/23328 | 0.0768 | 0.0809 | 1 |
| BP | GO:0044788 | modulation by host of viral process                                       | 1/60 | 31/23328 | 0.0768 | 0.0809 | 1 |
| BP | GO:0045920 | negative regulation of exocytosis                                         | 1/60 | 31/23328 | 0.0768 | 0.0809 | 1 |
| BP | GO:0045932 | negative regulation of muscle contraction                                 | 1/60 | 31/23328 | 0.0768 | 0.0809 | 1 |
| BP | GO:0048011 | neurotrophin TRK receptor signaling pathway                               | 1/60 | 31/23328 | 0.0768 | 0.0809 | 1 |
| BP | GO:0061036 | positive regulation of cartilage development                              | 1/60 | 31/23328 | 0.0768 | 0.0809 | 1 |
| BP | GO:0070670 | response to interleukin-4                                                 | 1/60 | 31/23328 | 0.0768 | 0.0809 | 1 |
| BP | GO:0090505 | epiboly involved in wound healing                                         | 1/60 | 31/23328 | 0.0768 | 0.0809 | 1 |
| BP | GO:1900117 | regulation of execution phase of apoptosis                                | 1/60 | 31/23328 | 0.0768 | 0.0809 | 1 |
| BP | GO:1902253 | regulation of intrinsic apoptotic signaling pathway by p53 class mediator | 1/60 | 31/23328 | 0.0768 | 0.0809 | 1 |
| BP | GO:1902932 | positive regulation of alcohol biosynthetic process                       | 1/60 | 31/23328 | 0.0768 | 0.0809 | 1 |
| BP | GO:0001893 | maternal placenta development                                             | 1/60 | 32/23328 | 0.0792 | 0.0820 | 1 |
| BP | GO:0002902 | regulation of B cell apoptotic process                                    | 1/60 | 32/23328 | 0.0792 | 0.0820 | 1 |
| BP | GO:0008206 | bile acid metabolic process                                               | 1/60 | 32/23328 | 0.0792 | 0.0820 | 1 |
| BP | GO:0010043 | response to zinc ion                                                      | 1/60 | 32/23328 | 0.0792 | 0.0820 | 1 |
| BP | GO:0010614 | negative regulation of cardiac muscle hypertrophy                         | 1/60 | 32/23328 | 0.0792 | 0.0820 | 1 |
| BP | GO:0010939 | regulation of necrotic cell death                                         | 1/60 | 32/23328 | 0.0792 | 0.0820 | 1 |
| BP | GO:0016242 | negative regulation of macroautophagy                                     | 1/60 | 32/23328 | 0.0792 | 0.0820 | 1 |
| BP | GO:0032673 | regulation of interleukin-4 production                                    | 1/60 | 32/23328 | 0.0792 | 0.0820 | 1 |
| BP | GO:0032692 | negative regulation of interleukin-1 production                           | 1/60 | 32/23328 | 0.0792 | 0.0820 | 1 |
| BP | GO:0032958 | inositol phosphate biosynthetic process                                   | 1/60 | 32/23328 | 0.0792 | 0.0820 | 1 |
| BP | GO:0042749 | regulation of circadian sleep/wake cycle                                  | 1/60 | 32/23328 | 0.0792 | 0.0820 | 1 |
| BP | GO:0048668 | collateral sprouting                                                      | 1/60 | 32/23328 | 0.0792 | 0.0820 | 1 |

|    |            |                                                                                          |      |          |        |        |   |
|----|------------|------------------------------------------------------------------------------------------|------|----------|--------|--------|---|
| BP | GO:0051150 | regulation of smooth muscle cell differentiation                                         | 1/60 | 32/23328 | 0.0792 | 0.0820 | 1 |
| BP | GO:0055022 | negative regulation of cardiac muscle tissue growth                                      | 1/60 | 32/23328 | 0.0792 | 0.0820 | 1 |
| BP | GO:0060561 | apoptotic process involved in morphogenesis                                              | 1/60 | 32/23328 | 0.0792 | 0.0820 | 1 |
| BP | GO:0061117 | negative regulation of heart growth                                                      | 1/60 | 32/23328 | 0.0792 | 0.0820 | 1 |
| BP | GO:0070536 | protein K63-linked deubiquitination                                                      | 1/60 | 32/23328 | 0.0792 | 0.0820 | 1 |
| BP | GO:0090504 | epiboly                                                                                  | 1/60 | 32/23328 | 0.0792 | 0.0820 | 1 |
| BP | GO:1901797 | negative regulation of signal transduction by p53 class mediator                         | 1/60 | 32/23328 | 0.0792 | 0.0820 | 1 |
| BP | GO:1902110 | positive regulation of mitochondrial membrane permeability involved in apoptotic process | 1/60 | 32/23328 | 0.0792 | 0.0820 | 1 |
| BP | GO:2000352 | negative regulation of endothelial cell apoptotic process                                | 1/60 | 32/23328 | 0.0792 | 0.0820 | 1 |
| BP | GO:2000515 | positive, alpha-beta T cell activation                                                   | 1/60 | 32/23328 | 0.0792 | 0.0820 | 1 |
| BP | GO:0006084 | acetyl-CoA metabolic process                                                             | 1/60 | 33/23328 | 0.0815 | 0.0836 | 1 |
| BP | GO:0022410 | circadian sleep/wake cycle process                                                       | 1/60 | 33/23328 | 0.0815 | 0.0836 | 1 |
| BP | GO:0032369 | negative regulation of lipid transport                                                   | 1/60 | 33/23328 | 0.0815 | 0.0836 | 1 |
| BP | GO:0033081 | regulation of T cell differentiation in thymus                                           | 1/60 | 33/23328 | 0.0815 | 0.0836 | 1 |
| BP | GO:0033561 | regulation of water loss via skin                                                        | 1/60 | 33/23328 | 0.0815 | 0.0836 | 1 |
| BP | GO:0045066 | regulatory T cell differentiation                                                        | 1/60 | 33/23328 | 0.0815 | 0.0836 | 1 |
| BP | GO:0045616 | regulation of keratinocyte differentiation                                               | 1/60 | 33/23328 | 0.0815 | 0.0836 | 1 |
| BP | GO:0060740 | prostate gland epithelium morphogenesis                                                  | 1/60 | 33/23328 | 0.0815 | 0.0836 | 1 |
| BP | GO:0060969 | negative regulation of gene silencing                                                    | 1/60 | 33/23328 | 0.0815 | 0.0836 | 1 |
| BP | GO:0061157 | mRNA destabilization                                                                     | 1/60 | 33/23328 | 0.0815 | 0.0836 | 1 |
| BP | GO:0002021 | response to dietary excess                                                               | 1/60 | 34/23328 | 0.0839 | 0.0848 | 1 |
| BP | GO:0006884 | cell volume homeostasis                                                                  | 1/60 | 34/23328 | 0.0839 | 0.0848 | 1 |

|    |            |                                                                                 |      |          |        |        |   |
|----|------------|---------------------------------------------------------------------------------|------|----------|--------|--------|---|
| BP | GO:0014741 | negative regulation of muscle hypertrophy                                       | 1/60 | 34/23328 | 0.0839 | 0.0848 | 1 |
| BP | GO:0021591 | ventricular system development                                                  | 1/60 | 34/23328 | 0.0839 | 0.0848 | 1 |
| BP | GO:0032509 | endosome transport via multivesicular body sorting pathway                      | 1/60 | 34/23328 | 0.0839 | 0.0848 | 1 |
| BP | GO:0035883 | enteroendocrine cell differentiation                                            | 1/60 | 34/23328 | 0.0839 | 0.0848 | 1 |
| BP | GO:0048048 | embryonic eye morphogenesis                                                     | 1/60 | 34/23328 | 0.0839 | 0.0848 | 1 |
| BP | GO:0060512 | prostate gland morphogenesis                                                    | 1/60 | 34/23328 | 0.0839 | 0.0848 | 1 |
| BP | GO:0090022 | regulation of neutrophil chemotaxis                                             | 1/60 | 34/23328 | 0.0839 | 0.0848 | 1 |
| BP | GO:1902686 | mitochondrial outer membrane permeabilization involved in programmed cell death | 1/60 | 34/23328 | 0.0839 | 0.0848 | 1 |
| BP | GO:1903146 | regulation of autophagy of mitochondrion                                        | 1/60 | 34/23328 | 0.0839 | 0.0848 | 1 |
| BP | GO:1904646 | cellular response to amyloid-beta                                               | 1/60 | 34/23328 | 0.0839 | 0.0848 | 1 |
| BP | GO:2000108 | positive regulation of leukocyte apoptotic process                              | 1/60 | 34/23328 | 0.0839 | 0.0848 | 1 |
| BP | GO:0006308 | DNA catabolic process                                                           | 1/60 | 35/23328 | 0.0863 | 0.0855 | 1 |
| BP | GO:0006458 | de novo' protein folding                                                        | 1/60 | 35/23328 | 0.0863 | 0.0855 | 1 |
| BP | GO:0006623 | protein targeting to vacuole                                                    | 1/60 | 35/23328 | 0.0863 | 0.0855 | 1 |
| BP | GO:0007031 | peroxisome organization                                                         | 1/60 | 35/23328 | 0.0863 | 0.0855 | 1 |
| BP | GO:0010837 | regulation of keratinocyte proliferation                                        | 1/60 | 35/23328 | 0.0863 | 0.0855 | 1 |
| BP | GO:0032094 | response to food                                                                | 1/60 | 35/23328 | 0.0863 | 0.0855 | 1 |
| BP | GO:0033866 | nucleoside bisphosphate biosynthetic process                                    | 1/60 | 35/23328 | 0.0863 | 0.0855 | 1 |
| BP | GO:0034030 | ribonucleoside bisphosphate biosynthetic process                                | 1/60 | 35/23328 | 0.0863 | 0.0855 | 1 |
| BP | GO:0034033 | purine nucleoside bisphosphate biosynthetic process                             | 1/60 | 35/23328 | 0.0863 | 0.0855 | 1 |
| BP | GO:0034122 | negative regulation of toll-like receptor signaling pathway                     | 1/60 | 35/23328 | 0.0863 | 0.0855 | 1 |
| BP | GO:0043516 | regulation of DNA damage response, signal transduction by p53 class mediator    | 1/60 | 35/23328 | 0.0863 | 0.0855 | 1 |
| BP | GO:0045987 | positive regulation of smooth muscle contraction                                | 1/60 | 35/23328 | 0.0863 | 0.0855 | 1 |
| BP | GO:0046677 | response to antibiotic                                                          | 1/60 | 35/23328 | 0.0863 | 0.0855 | 1 |



|    |            |                                                                               |      |          |        |        |   |
|----|------------|-------------------------------------------------------------------------------|------|----------|--------|--------|---|
| BP | GO:0050832 | defense response to fungus                                                    | 1/60 | 35/23328 | 0.0863 | 0.0855 | 1 |
| BP | GO:0050869 | negative regulation of B cell activation                                      | 1/60 | 35/23328 | 0.0863 | 0.0855 | 1 |
| BP | GO:0051084 | de novo' posttranslational protein folding                                    | 1/60 | 35/23328 | 0.0863 | 0.0855 | 1 |
| BP | GO:0055090 | acylglycerol homeostasis                                                      | 1/60 | 35/23328 | 0.0863 | 0.0855 | 1 |
| BP | GO:0060142 | regulation of syncytium formation by plasma membrane fusion                   | 1/60 | 35/23328 | 0.0863 | 0.0855 | 1 |
| BP | GO:0060236 | regulation of mitotic spindle organization                                    | 1/60 | 35/23328 | 0.0863 | 0.0855 | 1 |
| BP | GO:0070328 | triglyceride homeostasis                                                      | 1/60 | 35/23328 | 0.0863 | 0.0855 | 1 |
| BP | GO:0072538 | T-helper 17 type immune response                                              | 1/60 | 35/23328 | 0.0863 | 0.0855 | 1 |
| BP | GO:1900181 | negative regulation of protein localization to nucleus                        | 1/60 | 35/23328 | 0.0863 | 0.0855 | 1 |
| BP | GO:1902003 | regulation of amyloid-beta formation                                          | 1/60 | 35/23328 | 0.0863 | 0.0855 | 1 |
| BP | GO:0002701 | negative regulation of production of molecular mediator of immune response    | 1/60 | 36/23328 | 0.0886 | 0.0871 | 1 |
| BP | GO:0034381 | plasma lipoprotein particle clearance                                         | 1/60 | 36/23328 | 0.0886 | 0.0871 | 1 |
| BP | GO:0042745 | circadian sleep/wake cycle                                                    | 1/60 | 36/23328 | 0.0886 | 0.0871 | 1 |
| BP | GO:0042832 | defense response to protozoan                                                 | 1/60 | 36/23328 | 0.0886 | 0.0871 | 1 |
| BP | GO:0050779 | RNA destabilization                                                           | 1/60 | 36/23328 | 0.0886 | 0.0871 | 1 |
| BP | GO:2000191 | regulation of fatty acid transport                                            | 1/60 | 36/23328 | 0.0886 | 0.0871 | 1 |
| BP | GO:2000516 | positive regulation of CD4-positive, alpha-beta T cell activation             | 1/60 | 36/23328 | 0.0886 | 0.0871 | 1 |
| BP | GO:0007435 | salivary gland morphogenesis                                                  | 1/60 | 37/23328 | 0.0910 | 0.0886 | 1 |
| BP | GO:0021680 | cerebellar Purkinje cell layer development                                    | 1/60 | 37/23328 | 0.0910 | 0.0886 | 1 |
| BP | GO:0035794 | positive regulation of mitochondrial membrane permeability                    | 1/60 | 37/23328 | 0.0910 | 0.0886 | 1 |
| BP | GO:0045047 | protein targeting to ER                                                       | 1/60 | 37/23328 | 0.0910 | 0.0886 | 1 |
| BP | GO:1902229 | regulation of intrinsic apoptotic signaling pathway in response to DNA damage | 1/60 | 37/23328 | 0.0910 | 0.0886 | 1 |
| BP | GO:0001706 | endoderm formation                                                            | 1/60 | 38/23328 | 0.0933 | 0.0894 | 1 |

|    |            |                                                             |      |          |        |        |   |
|----|------------|-------------------------------------------------------------|------|----------|--------|--------|---|
| BP | GO:0010831 | positive regulation of myotube differentiation              | 1/60 | 38/23328 | 0.0933 | 0.0894 | 1 |
| BP | GO:0014002 | astrocyte development                                       | 1/60 | 38/23328 | 0.0933 | 0.0894 | 1 |
| BP | GO:0019432 | triglyceride biosynthetic process                           | 1/60 | 38/23328 | 0.0933 | 0.0894 | 1 |
| BP | GO:0032733 | positive regulation of interleukin-10 production            | 1/60 | 38/23328 | 0.0933 | 0.0894 | 1 |
| BP | GO:0033238 | regulation of cellular amine metabolic process              | 1/60 | 38/23328 | 0.0933 | 0.0894 | 1 |
| BP | GO:0035335 | peptidyl-tyrosine dephosphorylation                         | 1/60 | 38/23328 | 0.0933 | 0.0894 | 1 |
| BP | GO:0038084 | vascular endothelial growth factor signaling pathway        | 1/60 | 38/23328 | 0.0933 | 0.0894 | 1 |
| BP | GO:0043267 | negative regulation of potassium ion transport              | 1/60 | 38/23328 | 0.0933 | 0.0894 | 1 |
| BP | GO:0043304 | regulation of mast cell degranulation                       | 1/60 | 38/23328 | 0.0933 | 0.0894 | 1 |
| BP | GO:0045601 | regulation of endothelial cell differentiation              | 1/60 | 38/23328 | 0.0933 | 0.0894 | 1 |
| BP | GO:0045622 | regulation of T-helper cell differentiation                 | 1/60 | 38/23328 | 0.0933 | 0.0894 | 1 |
| BP | GO:0045940 | positive regulation of steroid metabolic process            | 1/60 | 38/23328 | 0.0933 | 0.0894 | 1 |
| BP | GO:0046627 | negative regulation of insulin receptor signaling pathway   | 1/60 | 38/23328 | 0.0933 | 0.0894 | 1 |
| BP | GO:0046640 | regulation of alpha-beta T cell proliferation               | 1/60 | 38/23328 | 0.0933 | 0.0894 | 1 |
| BP | GO:0051953 | negative regulation of amine transport                      | 1/60 | 38/23328 | 0.0933 | 0.0894 | 1 |
| BP | GO:0051968 | positive regulation of synaptic transmission, glutamatergic | 1/60 | 38/23328 | 0.0933 | 0.0894 | 1 |
| BP | GO:0071985 | multivesicular body sorting pathway                         | 1/60 | 38/23328 | 0.0933 | 0.0894 | 1 |
| BP | GO:1904037 | positive regulation of epithelial cell apoptotic process    | 1/60 | 38/23328 | 0.0933 | 0.0894 | 1 |
| BP | GO:2000463 | positive regulation of excitatory postsynaptic potential    | 1/60 | 38/23328 | 0.0933 | 0.0894 | 1 |
| BP | GO:0006739 | NADP metabolic process                                      | 1/60 | 39/23328 | 0.0956 | 0.0905 | 1 |
| BP | GO:0006778 | porphyrin-containing compound metabolic process             | 1/60 | 39/23328 | 0.0956 | 0.0905 | 1 |
| BP | GO:0007212 | dopamine receptor signaling pathway                         | 1/60 | 39/23328 | 0.0956 | 0.0905 | 1 |
| BP | GO:0021983 | pituitary gland development                                 | 1/60 | 39/23328 | 0.0956 | 0.0905 | 1 |

|    |            |                                                                                 |      |          |        |        |   |
|----|------------|---------------------------------------------------------------------------------|------|----------|--------|--------|---|
| BP | GO:0032506 | cytokinetic process                                                             | 1/60 | 39/23328 | 0.0956 | 0.0905 | 1 |
| BP | GO:0032735 | positive regulation of interleukin-12 production                                | 1/60 | 39/23328 | 0.0956 | 0.0905 | 1 |
| BP | GO:0033006 | regulation of mast cell activation involved in immune response                  | 1/60 | 39/23328 | 0.0956 | 0.0905 | 1 |
| BP | GO:0042554 | superoxide anion generation                                                     | 1/60 | 39/23328 | 0.0956 | 0.0905 | 1 |
| BP | GO:0060251 | regulation of glial cell proliferation                                          | 1/60 | 39/23328 | 0.0956 | 0.0905 | 1 |
| BP | GO:0061462 | protein localization to lysosome                                                | 1/60 | 39/23328 | 0.0956 | 0.0905 | 1 |
| BP | GO:0071827 | plasma lipoprotein particle organization                                        | 1/60 | 39/23328 | 0.0956 | 0.0905 | 1 |
| BP | GO:0090224 | regulation of spindle organization                                              | 1/60 | 39/23328 | 0.0956 | 0.0905 | 1 |
| BP | GO:1902108 | regulation of mitochondrial membrane permeability involved in apoptotic process | 1/60 | 39/23328 | 0.0956 | 0.0905 | 1 |
| BP | GO:0001562 | response to protozoan                                                           | 1/60 | 40/23328 | 0.0980 | 0.0915 | 1 |
| BP | GO:0001881 | receptor recycling                                                              | 1/60 | 40/23328 | 0.0980 | 0.0915 | 1 |
| BP | GO:0007616 | long-term memory                                                                | 1/60 | 40/23328 | 0.0980 | 0.0915 | 1 |
| BP | GO:0009409 | response to cold                                                                | 1/60 | 40/23328 | 0.0980 | 0.0915 | 1 |
| BP | GO:0030431 | sleep                                                                           | 1/60 | 40/23328 | 0.0980 | 0.0915 | 1 |
| BP | GO:0031076 | embryonic camera-type eye development                                           | 1/60 | 40/23328 | 0.0980 | 0.0915 | 1 |
| BP | GO:0032633 | interleukin-4 production                                                        | 1/60 | 40/23328 | 0.0980 | 0.0915 | 1 |
| BP | GO:0038179 | neurotrophin signaling pathway                                                  | 1/60 | 40/23328 | 0.0980 | 0.0915 | 1 |
| BP | GO:0040019 | positive regulation of embryonic development                                    | 1/60 | 40/23328 | 0.0980 | 0.0915 | 1 |
| BP | GO:0042092 | type 2 immune response                                                          | 1/60 | 40/23328 | 0.0980 | 0.0915 | 1 |
| BP | GO:0043368 | positive T cell selection                                                       | 1/60 | 40/23328 | 0.0980 | 0.0915 | 1 |
| BP | GO:0060259 | regulation of feeding behavior                                                  | 1/60 | 40/23328 | 0.0980 | 0.0915 | 1 |
| BP | GO:0071542 | dopaminergic neuron differentiation                                             | 1/60 | 40/23328 | 0.0980 | 0.0915 | 1 |
| BP | GO:1902692 | regulation of neuroblast proliferation                                          | 1/60 | 40/23328 | 0.0980 | 0.0915 | 1 |
| BP | GO:1903959 | regulation of anion transmembrane transport                                     | 1/60 | 40/23328 | 0.0980 | 0.0915 | 1 |
| BP | GO:1904645 | response to amyloid-beta                                                        | 1/60 | 40/23328 | 0.0980 | 0.0915 | 1 |
| BP | GO:0002369 | T cell cytokine production                                                      | 1/60 | 41/23328 | 0.1003 | 0.0928 | 1 |
| BP | GO:0007431 | salivary gland development                                                      | 1/60 | 41/23328 | 0.1003 | 0.0928 | 1 |
| BP | GO:0008207 | C21-steroid hormone metabolic process                                           | 1/60 | 41/23328 | 0.1003 | 0.0928 | 1 |

|    |            |                                                                                            |      |          |        |        |   |
|----|------------|--------------------------------------------------------------------------------------------|------|----------|--------|--------|---|
| BP | GO:0014037 | Schwann cell differentiation                                                               | 1/60 | 41/23328 | 0.1003 | 0.0928 | 1 |
| BP | GO:0034205 | amyloid-beta formation                                                                     | 1/60 | 41/23328 | 0.1003 | 0.0928 | 1 |
| BP | GO:0046164 | alcohol catabolic process                                                                  | 1/60 | 41/23328 | 0.1003 | 0.0928 | 1 |
| BP | GO:0051693 | actin filament capping                                                                     | 1/60 | 41/23328 | 0.1003 | 0.0928 | 1 |
| BP | GO:0071364 | cellular response to epidermal growth factor stimulus                                      | 1/60 | 41/23328 | 0.1003 | 0.0928 | 1 |
| BP | GO:0072595 | maintenance of protein localization in organelle                                           | 1/60 | 41/23328 | 0.1003 | 0.0928 | 1 |
| BP | GO:0072599 | establishment of protein localization to endoplasmic reticulum                             | 1/60 | 41/23328 | 0.1003 | 0.0928 | 1 |
| BP | GO:1900744 | regulation of p38MAPK cascade                                                              | 1/60 | 41/23328 | 0.1003 | 0.0928 | 1 |
| BP | GO:1902991 | regulation of amyloid precursor protein catabolic process                                  | 1/60 | 41/23328 | 0.1003 | 0.0928 | 1 |
| BP | GO:0030501 | positive regulation of bone mineralization                                                 | 1/60 | 42/23328 | 0.1026 | 0.0944 | 1 |
| BP | GO:0046633 | alpha-beta T cell proliferation                                                            | 1/60 | 42/23328 | 0.1026 | 0.0944 | 1 |
| BP | GO:0051154 | negative regulation of striated muscle cell differentiation                                | 1/60 | 42/23328 | 0.1026 | 0.0944 | 1 |
| BP | GO:1900077 | negative regulation of cellular response to insulin stimulus                               | 1/60 | 42/23328 | 0.1026 | 0.0944 | 1 |
| BP | GO:2000279 | negative regulation of DNA biosynthetic process                                            | 1/60 | 42/23328 | 0.1026 | 0.0944 | 1 |
| BP | GO:0001783 | B cell apoptotic process                                                                   | 1/60 | 43/23328 | 0.1049 | 0.0954 | 1 |
| BP | GO:0003298 | physiological muscle hypertrophy                                                           | 1/60 | 43/23328 | 0.1049 | 0.0954 | 1 |
| BP | GO:0003301 | physiological cardiac muscle hypertrophy                                                   | 1/60 | 43/23328 | 0.1049 | 0.0954 | 1 |
| BP | GO:0035774 | positive regulation of insulin secretion involved in cellular response to glucose stimulus | 1/60 | 43/23328 | 0.1049 | 0.0954 | 1 |
| BP | GO:0046636 | negative regulation of alpha-beta T cell activation                                        | 1/60 | 43/23328 | 0.1049 | 0.0954 | 1 |
| BP | GO:0046782 | regulation of viral transcription                                                          | 1/60 | 43/23328 | 0.1049 | 0.0954 | 1 |
| BP | GO:0055026 | negative regulation of cardiac muscle tissue development                                   | 1/60 | 43/23328 | 0.1049 | 0.0954 | 1 |
| BP | GO:0061049 | cell growth involved in cardiac muscle cell development                                    | 1/60 | 43/23328 | 0.1049 | 0.0954 | 1 |
| BP | GO:0070232 | regulation of T cell apoptotic process                                                     | 1/60 | 43/23328 | 0.1049 | 0.0954 | 1 |

|    |            |                                                                          |      |          |        |        |   |
|----|------------|--------------------------------------------------------------------------|------|----------|--------|--------|---|
| BP | GO:0071825 | protein-lipid complex subunit organization                               | 1/60 | 43/23328 | 0.1049 | 0.0954 | 1 |
| BP | GO:1901381 | positive regulation of potassium ion transmembrane transport             | 1/60 | 43/23328 | 0.1049 | 0.0954 | 1 |
| BP | GO:1902742 | apoptotic process involved in development                                | 1/60 | 43/23328 | 0.1049 | 0.0954 | 1 |
| BP | GO:0007080 | mitotic metaphase plate congression                                      | 1/60 | 44/23328 | 0.1072 | 0.0964 | 1 |
| BP | GO:0010559 | regulation of glycoprotein biosynthetic process                          | 1/60 | 44/23328 | 0.1072 | 0.0964 | 1 |
| BP | GO:0016925 | protein sumoylation                                                      | 1/60 | 44/23328 | 0.1072 | 0.0964 | 1 |
| BP | GO:0032350 | regulation of hormone metabolic process                                  | 1/60 | 44/23328 | 0.1072 | 0.0964 | 1 |
| BP | GO:0033628 | regulation of cell adhesion mediated by integrin                         | 1/60 | 44/23328 | 0.1072 | 0.0964 | 1 |
| BP | GO:0045823 | positive regulation of heart contraction                                 | 1/60 | 44/23328 | 0.1072 | 0.0964 | 1 |
| BP | GO:0046621 | negative regulation of organ growth                                      | 1/60 | 44/23328 | 0.1072 | 0.0964 | 1 |
| BP | GO:0048854 | brain morphogenesis                                                      | 1/60 | 44/23328 | 0.1072 | 0.0964 | 1 |
| BP | GO:0050691 | regulation of defense response to virus by host                          | 1/60 | 44/23328 | 0.1072 | 0.0964 | 1 |
| BP | GO:0070849 | response to epidermal growth factor                                      | 1/60 | 44/23328 | 0.1072 | 0.0964 | 1 |
| BP | GO:1901998 | toxin transport                                                          | 1/60 | 44/23328 | 0.1072 | 0.0964 | 1 |
| BP | GO:1903523 | negative regulation of blood circulation                                 | 1/60 | 44/23328 | 0.1072 | 0.0964 | 1 |
| BP | GO:0010464 | regulation of mesenchymal cell proliferation                             | 1/60 | 45/23328 | 0.1095 | 0.0979 | 1 |
| BP | GO:0010824 | regulation of centrosome duplication                                     | 1/60 | 45/23328 | 0.1095 | 0.0979 | 1 |
| BP | GO:0032873 | negative regulation of stress-activated MAPK cascade                     | 1/60 | 45/23328 | 0.1095 | 0.0979 | 1 |
| BP | GO:0042181 | ketone biosynthetic process                                              | 1/60 | 45/23328 | 0.1095 | 0.0979 | 1 |
| BP | GO:0050856 | regulation of T cell receptor signaling pathway                          | 1/60 | 45/23328 | 0.1095 | 0.0979 | 1 |
| BP | GO:0070303 | negative regulation of stress-activated protein kinase signaling cascade | 1/60 | 45/23328 | 0.1095 | 0.0979 | 1 |
| BP | GO:1902743 | regulation of lamellipodium organization                                 | 1/60 | 45/23328 | 0.1095 | 0.0979 | 1 |

|    |            |                                                                        |      |          |        |        |   |
|----|------------|------------------------------------------------------------------------|------|----------|--------|--------|---|
| BP | GO:0010799 | regulation of peptidyl-threonine phosphorylation                       | 1/60 | 46/23328 | 0.1118 | 0.0992 | 1 |
| BP | GO:0019083 | viral transcription                                                    | 1/60 | 46/23328 | 0.1118 | 0.0992 | 1 |
| BP | GO:0030835 | negative regulation of actin filament depolymerization                 | 1/60 | 46/23328 | 0.1118 | 0.0992 | 1 |
| BP | GO:0043616 | keratinocyte proliferation                                             | 1/60 | 46/23328 | 0.1118 | 0.0992 | 1 |
| BP | GO:0045740 | positive regulation of DNA replication                                 | 1/60 | 46/23328 | 0.1118 | 0.0992 | 1 |
| BP | GO:0048536 | spleen development                                                     | 1/60 | 46/23328 | 0.1118 | 0.0992 | 1 |
| BP | GO:0090317 | negative regulation of intracellular protein transport                 | 1/60 | 46/23328 | 0.1118 | 0.0992 | 1 |
| BP | GO:0098926 | postsynaptic signal transduction                                       | 1/60 | 46/23328 | 0.1118 | 0.0992 | 1 |
| BP | GO:0001941 | postsynaptic membrane organization                                     | 1/60 | 47/23328 | 0.1141 | 0.1003 | 1 |
| BP | GO:0002820 | negative regulation of adaptive immune response                        | 1/60 | 47/23328 | 0.1141 | 0.1003 | 1 |
| BP | GO:0010718 | positive regulation of epithelial to mesenchymal transition            | 1/60 | 47/23328 | 0.1141 | 0.1003 | 1 |
| BP | GO:0033013 | tetrapyrrole metabolic process                                         | 1/60 | 47/23328 | 0.1141 | 0.1003 | 1 |
| BP | GO:0043124 | negative regulation of I-kappaB kinase/NF-kappaB signaling             | 1/60 | 47/23328 | 0.1141 | 0.1003 | 1 |
| BP | GO:0043277 | apoptotic cell clearance                                               | 1/60 | 47/23328 | 0.1141 | 0.1003 | 1 |
| BP | GO:0045581 | negative regulation of T cell differentiation                          | 1/60 | 47/23328 | 0.1141 | 0.1003 | 1 |
| BP | GO:0046460 | neutral lipid biosynthetic process                                     | 1/60 | 47/23328 | 0.1141 | 0.1003 | 1 |
| BP | GO:0046463 | acylglycerol biosynthetic process                                      | 1/60 | 47/23328 | 0.1141 | 0.1003 | 1 |
| BP | GO:0051646 | mitochondrion localization                                             | 1/60 | 47/23328 | 0.1141 | 0.1003 | 1 |
| BP | GO:0060135 | maternal process involved in female pregnancy                          | 1/60 | 47/23328 | 0.1141 | 0.1003 | 1 |
| BP | GO:0010862 | positive regulation of pathway-restricted SMAD protein phosphorylation | 1/60 | 48/23328 | 0.1164 | 0.1018 | 1 |
| BP | GO:0010883 | regulation of lipid storage                                            | 1/60 | 48/23328 | 0.1164 | 0.1018 | 1 |
| BP | GO:0032965 | regulation of collagen biosynthetic process                            | 1/60 | 48/23328 | 0.1164 | 0.1018 | 1 |
| BP | GO:0044848 | biological phase                                                       | 1/60 | 48/23328 | 0.1164 | 0.1018 | 1 |
| BP | GO:0045907 | positive regulation of vasoconstriction                                | 1/60 | 48/23328 | 0.1164 | 0.1018 | 1 |
| BP | GO:0070527 | platelet aggregation                                                   | 1/60 | 48/23328 | 0.1164 | 0.1018 | 1 |

|    |            |                                                                                          |      |          |        |        |   |
|----|------------|------------------------------------------------------------------------------------------|------|----------|--------|--------|---|
| BP | GO:1902622 | regulation of neutrophil migration                                                       | 1/60 | 48/23328 | 0.1164 | 0.1018 | 1 |
| BP | GO:0006692 | prostanoid metabolic process                                                             | 1/60 | 49/23328 | 0.1187 | 0.1031 | 1 |
| BP | GO:0006693 | prostaglandin metabolic process                                                          | 1/60 | 49/23328 | 0.1187 | 0.1031 | 1 |
| BP | GO:0010332 | response to gamma radiation                                                              | 1/60 | 49/23328 | 0.1187 | 0.1031 | 1 |
| BP | GO:0035196 | production of miRNAs involved in gene silencing by miRNA                                 | 1/60 | 49/23328 | 0.1187 | 0.1031 | 1 |
| BP | GO:0042755 | eating behavior                                                                          | 1/60 | 49/23328 | 0.1187 | 0.1031 | 1 |
| BP | GO:0046638 | positive regulation of alpha-beta T cell differentiation                                 | 1/60 | 49/23328 | 0.1187 | 0.1031 | 1 |
| BP | GO:0048255 | mRNA stabilization                                                                       | 1/60 | 49/23328 | 0.1187 | 0.1031 | 1 |
| BP | GO:0090102 | cochlea development                                                                      | 1/60 | 49/23328 | 0.1187 | 0.1031 | 1 |
| BP | GO:1903018 | regulation of glycoprotein metabolic process                                             | 1/60 | 49/23328 | 0.1187 | 0.1031 | 1 |
| BP | GO:1905953 | negative regulation of lipid localization                                                | 1/60 | 49/23328 | 0.1187 | 0.1031 | 1 |
| BP | GO:2000725 | regulation of cardiac muscle cell differentiation                                        | 1/60 | 49/23328 | 0.1187 | 0.1031 | 1 |
| BP | GO:0007032 | endosome organization                                                                    | 1/60 | 50/23328 | 0.1209 | 0.1042 | 1 |
| BP | GO:0007520 | myoblast fusion                                                                          | 1/60 | 50/23328 | 0.1209 | 0.1042 | 1 |
| BP | GO:0008333 | endosome to lysosome transport                                                           | 1/60 | 50/23328 | 0.1209 | 0.1042 | 1 |
| BP | GO:0032309 | icosanoid secretion                                                                      | 1/60 | 50/23328 | 0.1209 | 0.1042 | 1 |
| BP | GO:0032715 | negative regulation of interleukin-6 production                                          | 1/60 | 50/23328 | 0.1209 | 0.1042 | 1 |
| BP | GO:0043370 | regulation of CD4-positive, alpha-beta T cell differentiation                            | 1/60 | 50/23328 | 0.1209 | 0.1042 | 1 |
| BP | GO:0043392 | negative regulation of DNA binding                                                       | 1/60 | 50/23328 | 0.1209 | 0.1042 | 1 |
| BP | GO:0051438 | regulation of ubiquitin-protein transferase activity                                     | 1/60 | 50/23328 | 0.1209 | 0.1042 | 1 |
| BP | GO:0070169 | positive regulation of biomineral tissue development                                     | 1/60 | 50/23328 | 0.1209 | 0.1042 | 1 |
| BP | GO:0110151 | positive regulation of biomineralization                                                 | 1/60 | 50/23328 | 0.1209 | 0.1042 | 1 |
| BP | GO:1903573 | negative regulation of response to endoplasmic reticulum stress nuclear-transcribed mRNA | 1/60 | 50/23328 | 0.1209 | 0.1042 | 1 |
| BP | GO:0000288 | catabolic process, deadenylation-dependent decay                                         | 1/60 | 51/23328 | 0.1232 | 0.1051 | 1 |
| BP | GO:0008089 | anterograde axonal transport                                                             | 1/60 | 51/23328 | 0.1232 | 0.1051 | 1 |
| BP | GO:0031050 | dsRNA processing                                                                         | 1/60 | 51/23328 | 0.1232 | 0.1051 | 1 |

|    |            |                                                                     |      |          |        |        |   |
|----|------------|---------------------------------------------------------------------|------|----------|--------|--------|---|
| BP | GO:0031663 | lipopolysaccharide-mediated signaling pathway                       | 1/60 | 51/23328 | 0.1232 | 0.1051 | 1 |
| BP | GO:0032330 | regulation of chondrocyte differentiation                           | 1/60 | 51/23328 | 0.1232 | 0.1051 | 1 |
| BP | GO:0032722 | positive regulation of chemokine production                         | 1/60 | 51/23328 | 0.1232 | 0.1051 | 1 |
| BP | GO:0042987 | amyloid precursor protein catabolic process                         | 1/60 | 51/23328 | 0.1232 | 0.1051 | 1 |
| BP | GO:0043303 | mast cell degranulation                                             | 1/60 | 51/23328 | 0.1232 | 0.1051 | 1 |
| BP | GO:0046189 | phenol-containing compound biosynthetic process                     | 1/60 | 51/23328 | 0.1232 | 0.1051 | 1 |
| BP | GO:0046470 | phosphatidylcholine metabolic process                               | 1/60 | 51/23328 | 0.1232 | 0.1051 | 1 |
| BP | GO:0070918 | production of small RNA involved in gene silencing by RNA           | 1/60 | 51/23328 | 0.1232 | 0.1051 | 1 |
| BP | GO:0071470 | cellular response to osmotic stress                                 | 1/60 | 51/23328 | 0.1232 | 0.1051 | 1 |
| BP | GO:0090311 | regulation of protein deacetylation                                 | 1/60 | 51/23328 | 0.1232 | 0.1051 | 1 |
| BP | GO:0002279 | mast cell activation involved in immune response                    | 1/60 | 52/23328 | 0.1255 | 0.1062 | 1 |
| BP | GO:0002448 | mast cell mediated immunity                                         | 1/60 | 52/23328 | 0.1255 | 0.1062 | 1 |
| BP | GO:0002639 | positive regulation of immunoglobulin production                    | 1/60 | 52/23328 | 0.1255 | 0.1062 | 1 |
| BP | GO:0009620 | response to fungus                                                  | 1/60 | 52/23328 | 0.1255 | 0.1062 | 1 |
| BP | GO:0030857 | negative regulation of epithelial cell differentiation              | 1/60 | 52/23328 | 0.1255 | 0.1062 | 1 |
| BP | GO:0043268 | positive regulation of potassium ion transport                      | 1/60 | 52/23328 | 0.1255 | 0.1062 | 1 |
| BP | GO:0045104 | intermediate filament cytoskeleton organization                     | 1/60 | 52/23328 | 0.1255 | 0.1062 | 1 |
| BP | GO:0045933 | positive regulation of muscle contraction                           | 1/60 | 52/23328 | 0.1255 | 0.1062 | 1 |
| BP | GO:0061014 | positive regulation of mRNA catabolic process                       | 1/60 | 52/23328 | 0.1255 | 0.1062 | 1 |
| BP | GO:0065002 | intracellular protein transmembrane transport                       | 1/60 | 52/23328 | 0.1255 | 0.1062 | 1 |
| BP | GO:0140353 | lipid export from cell                                              | 1/60 | 52/23328 | 0.1255 | 0.1062 | 1 |
| BP | GO:1900015 | regulation of cytokine production involved in inflammatory response | 1/60 | 52/23328 | 0.1255 | 0.1062 | 1 |



|    |            |                                                                              |      |          |        |        |   |
|----|------------|------------------------------------------------------------------------------|------|----------|--------|--------|---|
| BP | GO:0001662 | behavioral fear response                                                     | 1/60 | 53/23328 | 0.1277 | 0.1070 | 1 |
| BP | GO:0001960 | negative regulation of cytokine-mediated signaling pathway                   | 1/60 | 53/23328 | 0.1277 | 0.1070 | 1 |
| BP | GO:0009395 | phospholipid catabolic process                                               | 1/60 | 53/23328 | 0.1277 | 0.1070 | 1 |
| BP | GO:0030850 | prostate gland development                                                   | 1/60 | 53/23328 | 0.1277 | 0.1070 | 1 |
| BP | GO:0032720 | negative regulation of tumor necrosis factor production                      | 1/60 | 53/23328 | 0.1277 | 0.1070 | 1 |
| BP | GO:0034605 | cellular response to heat                                                    | 1/60 | 53/23328 | 0.1277 | 0.1070 | 1 |
| BP | GO:0044058 | regulation of digestive system process                                       | 1/60 | 53/23328 | 0.1277 | 0.1070 | 1 |
| BP | GO:0045103 | intermediate filament-based process                                          | 1/60 | 53/23328 | 0.1277 | 0.1070 | 1 |
| BP | GO:0046148 | pigment biosynthetic process                                                 | 1/60 | 53/23328 | 0.1277 | 0.1070 | 1 |
| BP | GO:0046902 | regulation of mitochondrial membrane permeability                            | 1/60 | 53/23328 | 0.1277 | 0.1070 | 1 |
| BP | GO:0050435 | amyloid-beta metabolic process                                               | 1/60 | 53/23328 | 0.1277 | 0.1070 | 1 |
| BP | GO:0051055 | negative regulation of lipid biosynthetic process                            | 1/60 | 53/23328 | 0.1277 | 0.1070 | 1 |
| BP | GO:0051955 | regulation of amino acid transport                                           | 1/60 | 53/23328 | 0.1277 | 0.1070 | 1 |
| BP | GO:0061383 | trabecula morphogenesis                                                      | 1/60 | 53/23328 | 0.1277 | 0.1070 | 1 |
| BP | GO:0002209 | behavioral defense response                                                  | 1/60 | 54/23328 | 0.1300 | 0.1079 | 1 |
| BP | GO:0010823 | negative regulation of mitochondrion organization                            | 1/60 | 54/23328 | 0.1300 | 0.1079 | 1 |
| BP | GO:0014009 | glial cell proliferation                                                     | 1/60 | 54/23328 | 0.1300 | 0.1079 | 1 |
| BP | GO:0035272 | exocrine system development                                                  | 1/60 | 54/23328 | 0.1300 | 0.1079 | 1 |
| BP | GO:0042743 | hydrogen peroxide metabolic process                                          | 1/60 | 54/23328 | 0.1300 | 0.1079 | 1 |
| BP | GO:0043300 | regulation of leukocyte degranulation                                        | 1/60 | 54/23328 | 0.1300 | 0.1079 | 1 |
| BP | GO:0045687 | positive regulation of glial cell differentiation                            | 1/60 | 54/23328 | 0.1300 | 0.1079 | 1 |
| BP | GO:0048546 | digestive tract morphogenesis                                                | 1/60 | 54/23328 | 0.1300 | 0.1079 | 1 |
| BP | GO:0071806 | protein transmembrane transport                                              | 1/60 | 54/23328 | 0.1300 | 0.1079 | 1 |
| BP | GO:1902476 | chloride transmembrane transport                                             | 1/60 | 54/23328 | 0.1300 | 0.1079 | 1 |
| BP | GO:1903556 | negative regulation of tumor necrosis factor superfamily cytokine production | 1/60 | 54/23328 | 0.1300 | 0.1079 | 1 |

|    |            |                                                                        |      |          |        |        |   |
|----|------------|------------------------------------------------------------------------|------|----------|--------|--------|---|
|    |            | regulation of vascular                                                 |      |          |        |        |   |
| BP | GO:1904705 | associated smooth muscle cell proliferation                            | 1/60 | 54/23328 | 0.1300 | 0.1079 | 1 |
| BP | GO:1990874 | vascular associated smooth muscle cell proliferation                   | 1/60 | 54/23328 | 0.1300 | 0.1079 | 1 |
| BP | GO:2000649 | regulation of sodium ion transmembrane transporter activity            | 1/60 | 54/23328 | 0.1300 | 0.1079 | 1 |
| BP | GO:0002534 | cytokine production involved in inflammatory response                  | 1/60 | 55/23328 | 0.1322 | 0.1091 | 1 |
| BP | GO:0002720 | positive regulation of cytokine production involved in immune response | 1/60 | 55/23328 | 0.1322 | 0.1091 | 1 |
| BP | GO:0010712 | regulation of collagen metabolic process                               | 1/60 | 55/23328 | 0.1322 | 0.1091 | 1 |
| BP | GO:0030834 | regulation of actin filament depolymerization                          | 1/60 | 55/23328 | 0.1322 | 0.1091 | 1 |
| BP | GO:0042531 | positive regulation of tyrosine phosphorylation of STAT protein        | 1/60 | 55/23328 | 0.1322 | 0.1091 | 1 |
| BP | GO:0045604 | regulation of epidermal cell differentiation                           | 1/60 | 55/23328 | 0.1322 | 0.1091 | 1 |
| BP | GO:0050891 | multicellular organismal water homeostasis                             | 1/60 | 55/23328 | 0.1322 | 0.1091 | 1 |
| BP | GO:0002704 | negative regulation of leukocyte mediated immunity                     | 1/60 | 56/23328 | 0.1344 | 0.1100 | 1 |
| BP | GO:0021587 | cerebellum morphogenesis                                               | 1/60 | 56/23328 | 0.1344 | 0.1100 | 1 |
| BP | GO:0043647 | inositol phosphate metabolic process                                   | 1/60 | 56/23328 | 0.1344 | 0.1100 | 1 |
| BP | GO:0045620 | negative regulation of lymphocyte differentiation                      | 1/60 | 56/23328 | 0.1344 | 0.1100 | 1 |
| BP | GO:0050732 | negative regulation of peptidyl-tyrosine phosphorylation               | 1/60 | 56/23328 | 0.1344 | 0.1100 | 1 |
| BP | GO:0050873 | brown fat cell differentiation                                         | 1/60 | 56/23328 | 0.1344 | 0.1100 | 1 |
| BP | GO:0051568 | histone H3-K4 methylation                                              | 1/60 | 56/23328 | 0.1344 | 0.1100 | 1 |
| BP | GO:0070265 | necrotic cell death                                                    | 1/60 | 56/23328 | 0.1344 | 0.1100 | 1 |
| BP | GO:0098586 | cellular response to virus                                             | 1/60 | 56/23328 | 0.1344 | 0.1100 | 1 |
| BP | GO:0098815 | modulation of excitatory postsynaptic potential                        | 1/60 | 56/23328 | 0.1344 | 0.1100 | 1 |
| BP | GO:1900449 | regulation of glutamate receptor signaling pathway                     | 1/60 | 56/23328 | 0.1344 | 0.1100 | 1 |
| BP | GO:1903350 | response to dopamine                                                   | 1/60 | 56/23328 | 0.1344 | 0.1100 | 1 |

|    |            |                                                                     |      |          |        |        |   |
|----|------------|---------------------------------------------------------------------|------|----------|--------|--------|---|
| BP | GO:1903351 | cellular response to dopamine                                       | 1/60 | 56/23328 | 0.1344 | 0.1100 | 1 |
| BP | GO:0002067 | glandular epithelial cell differentiation                           | 1/60 | 57/23328 | 0.1367 | 0.1108 | 1 |
| BP | GO:0010463 | mesenchymal cell proliferation                                      | 1/60 | 57/23328 | 0.1367 | 0.1108 | 1 |
| BP | GO:0019748 | secondary metabolic process                                         | 1/60 | 57/23328 | 0.1367 | 0.1108 | 1 |
| BP | GO:0032964 | collagen biosynthetic process                                       | 1/60 | 57/23328 | 0.1367 | 0.1108 | 1 |
| BP | GO:0033003 | regulation of mast cell activation                                  | 1/60 | 57/23328 | 0.1367 | 0.1108 | 1 |
| BP | GO:0043030 | regulation of macrophage activation                                 | 1/60 | 57/23328 | 0.1367 | 0.1108 | 1 |
| BP | GO:0043489 | RNA stabilization                                                   | 1/60 | 57/23328 | 0.1367 | 0.1108 | 1 |
| BP | GO:0045058 | T cell selection                                                    | 1/60 | 57/23328 | 0.1367 | 0.1108 | 1 |
| BP | GO:0060761 | negative regulation of response to cytokine stimulus                | 1/60 | 57/23328 | 0.1367 | 0.1108 | 1 |
| BP | GO:0071622 | regulation of granulocyte chemotaxis                                | 1/60 | 57/23328 | 0.1367 | 0.1108 | 1 |
| BP | GO:1902373 | negative regulation of mRNA catabolic process                       | 1/60 | 57/23328 | 0.1367 | 0.1108 | 1 |
| BP | GO:2000648 | positive regulation of stem cell proliferation                      | 1/60 | 57/23328 | 0.1367 | 0.1108 | 1 |
| BP | GO:0001755 | neural crest cell migration                                         | 1/60 | 58/23328 | 0.1389 | 0.1122 | 1 |
| BP | GO:0010656 | negative regulation of muscle cell apoptotic process                | 1/60 | 58/23328 | 0.1389 | 0.1122 | 1 |
| BP | GO:0032653 | regulation of interleukin-10 production                             | 1/60 | 58/23328 | 0.1389 | 0.1122 | 1 |
| BP | GO:0032655 | regulation of interleukin-12 production                             | 1/60 | 58/23328 | 0.1389 | 0.1122 | 1 |
| BP | GO:0042596 | fear response                                                       | 1/60 | 58/23328 | 0.1389 | 0.1122 | 1 |
| BP | GO:0045071 | negative regulation of viral genome replication                     | 1/60 | 58/23328 | 0.1389 | 0.1122 | 1 |
| BP | GO:0002011 | morphogenesis of an epithelial sheet                                | 1/60 | 59/23328 | 0.1411 | 0.1138 | 1 |
| BP | GO:0007164 | establishment of tissue polarity                                    | 1/60 | 59/23328 | 0.1411 | 0.1138 | 1 |
| BP | GO:0030042 | actin filament depolymerization                                     | 1/60 | 59/23328 | 0.1411 | 0.1138 | 1 |
| BP | GO:0021517 | ventral spinal cord development                                     | 1/60 | 60/23328 | 0.1433 | 0.1147 | 1 |
| BP | GO:0021575 | hindbrain morphogenesis                                             | 1/60 | 60/23328 | 0.1433 | 0.1147 | 1 |
| BP | GO:0045744 | negative regulation of G protein-coupled receptor signaling pathway | 1/60 | 60/23328 | 0.1433 | 0.1147 | 1 |
| BP | GO:0046605 | regulation of centrosome cycle                                      | 1/60 | 60/23328 | 0.1433 | 0.1147 | 1 |
| BP | GO:0051310 | metaphase plate congression                                         | 1/60 | 60/23328 | 0.1433 | 0.1147 | 1 |

|    |            |                                                                |      |          |        |        |   |
|----|------------|----------------------------------------------------------------|------|----------|--------|--------|---|
| BP | GO:0070098 | chemokine-mediated signaling pathway                           | 1/60 | 60/23328 | 0.1433 | 0.1147 | 1 |
| BP | GO:0070231 | T cell apoptotic process                                       | 1/60 | 60/23328 | 0.1433 | 0.1147 | 1 |
| BP | GO:1901016 | regulation of potassium ion transmembrane transporter activity | 1/60 | 60/23328 | 0.1433 | 0.1147 | 1 |
| BP | GO:1901616 | organic hydroxy compound catabolic process                     | 1/60 | 60/23328 | 0.1433 | 0.1147 | 1 |
| BP | GO:2001238 | positive regulation of extrinsic apoptotic signaling pathway   | 1/60 | 60/23328 | 0.1433 | 0.1147 | 1 |
| BP | GO:0006446 | regulation of translational initiation                         | 1/60 | 61/23328 | 0.1456 | 0.1160 | 1 |
| BP | GO:0032615 | interleukin-12 production                                      | 1/60 | 61/23328 | 0.1456 | 0.1160 | 1 |
| BP | GO:0045824 | negative regulation of innate immune response                  | 1/60 | 61/23328 | 0.1456 | 0.1160 | 1 |
| BP | GO:0048286 | lung alveolus development                                      | 1/60 | 61/23328 | 0.1456 | 0.1160 | 1 |
| BP | GO:0051851 | modulation by host of symbiont process                         | 1/60 | 61/23328 | 0.1456 | 0.1160 | 1 |
| BP | GO:0006081 | cellular aldehyde metabolic process                            | 1/60 | 62/23328 | 0.1478 | 0.1168 | 1 |
| BP | GO:0006900 | vesicle budding from membrane                                  | 1/60 | 62/23328 | 0.1478 | 0.1168 | 1 |
| BP | GO:0030330 | DNA damage response, signal transduction by p53 class mediator | 1/60 | 62/23328 | 0.1478 | 0.1168 | 1 |
| BP | GO:0031640 | killing of cells of other organism                             | 1/60 | 62/23328 | 0.1478 | 0.1168 | 1 |
| BP | GO:0032613 | interleukin-10 production                                      | 1/60 | 62/23328 | 0.1478 | 0.1168 | 1 |
| BP | GO:0046513 | ceramide biosynthetic process                                  | 1/60 | 62/23328 | 0.1478 | 0.1168 | 1 |
| BP | GO:0048512 | circadian behavior                                             | 1/60 | 62/23328 | 0.1478 | 0.1168 | 1 |
| BP | GO:0050854 | regulation of antigen receptor-mediated signaling pathway      | 1/60 | 62/23328 | 0.1478 | 0.1168 | 1 |
| BP | GO:0051148 | negative regulation of muscle cell differentiation             | 1/60 | 62/23328 | 0.1478 | 0.1168 | 1 |
| BP | GO:0051926 | negative regulation of calcium ion transport                   | 1/60 | 62/23328 | 0.1478 | 0.1168 | 1 |
| BP | GO:0060393 | regulation of pathway-restricted SMAD protein phosphorylation  | 1/60 | 62/23328 | 0.1478 | 0.1168 | 1 |
| BP | GO:1903078 | positive regulation of protein localization to plasma membrane | 1/60 | 62/23328 | 0.1478 | 0.1168 | 1 |
| BP | GO:1905207 | regulation of cardiocyte differentiation                       | 1/60 | 62/23328 | 0.1478 | 0.1168 | 1 |

|    |            |                                                                                   |      |          |        |        |   |
|----|------------|-----------------------------------------------------------------------------------|------|----------|--------|--------|---|
| BP | GO:0001947 | heart looping                                                                     | 1/60 | 63/23328 | 0.1500 | 0.1182 | 1 |
| BP | GO:0010830 | regulation of myotube differentiation                                             | 1/60 | 63/23328 | 0.1500 | 0.1182 | 1 |
| BP | GO:0030104 | water homeostasis                                                                 | 1/60 | 63/23328 | 0.1500 | 0.1182 | 1 |
| BP | GO:0050994 | regulation of lipid catabolic process                                             | 1/60 | 63/23328 | 0.1500 | 0.1182 | 1 |
| BP | GO:0070936 | protein K48-linked ubiquitination                                                 | 1/60 | 63/23328 | 0.1500 | 0.1182 | 1 |
| BP | GO:0071479 | cellular response to ionizing radiation                                           | 1/60 | 63/23328 | 0.1500 | 0.1182 | 1 |
| BP | GO:0001658 | branching involved in ureteric bud morphogenesis                                  | 1/60 | 64/23328 | 0.1521 | 0.1194 | 1 |
| BP | GO:0007622 | rhythmic behavior                                                                 | 1/60 | 64/23328 | 0.1521 | 0.1194 | 1 |
| BP | GO:0046173 | polyol biosynthetic process                                                       | 1/60 | 64/23328 | 0.1521 | 0.1194 | 1 |
| BP | GO:0050707 | regulation of cytokine secretion                                                  | 1/60 | 64/23328 | 0.1521 | 0.1194 | 1 |
| BP | GO:0070059 | intrinsic apoptotic signaling pathway in response to endoplasmic reticulum stress | 1/60 | 64/23328 | 0.1521 | 0.1194 | 1 |
| BP | GO:1902305 | regulation of sodium ion transmembrane transport                                  | 1/60 | 64/23328 | 0.1521 | 0.1194 | 1 |
| BP | GO:1903510 | mucopolysaccharide metabolic process                                              | 1/60 | 64/23328 | 0.1521 | 0.1194 | 1 |
| BP | GO:0034121 | regulation of toll-like receptor signaling pathway                                | 1/60 | 65/23328 | 0.1543 | 0.1207 | 1 |
| BP | GO:0042093 | T-helper cell differentiation                                                     | 1/60 | 65/23328 | 0.1543 | 0.1207 | 1 |
| BP | GO:0060389 | pathway-restricted SMAD protein phosphorylation                                   | 1/60 | 65/23328 | 0.1543 | 0.1207 | 1 |
| BP | GO:0098840 | protein transport along microtubule                                               | 1/60 | 65/23328 | 0.1543 | 0.1207 | 1 |
| BP | GO:0099118 | microtubule-based protein transport                                               | 1/60 | 65/23328 | 0.1543 | 0.1207 | 1 |
| BP | GO:0002294 | CD4-positive, alpha-beta T cell differentiation involved in immune response       | 1/60 | 66/23328 | 0.1565 | 0.1221 | 1 |
| BP | GO:0042982 | amyloid precursor protein metabolic process                                       | 1/60 | 66/23328 | 0.1565 | 0.1221 | 1 |
| BP | GO:0070972 | protein localization to endoplasmic reticulum                                     | 1/60 | 66/23328 | 0.1565 | 0.1221 | 1 |
| BP | GO:0002293 | alpha-beta T cell differentiation involved in immune response                     | 1/60 | 67/23328 | 0.1587 | 0.1231 | 1 |
| BP | GO:0006940 | regulation of smooth muscle contraction                                           | 1/60 | 67/23328 | 0.1587 | 0.1231 | 1 |

|    |            |                                                               |      |          |        |        |   |
|----|------------|---------------------------------------------------------------|------|----------|--------|--------|---|
| BP | GO:0021695 | cerebellar cortex development                                 | 1/60 | 67/23328 | 0.1587 | 0.1231 | 1 |
| BP | GO:0033209 | tumor necrosis factor-mediated signaling pathway              | 1/60 | 67/23328 | 0.1587 | 0.1231 | 1 |
| BP | GO:0051298 | centrosome duplication                                        | 1/60 | 67/23328 | 0.1587 | 0.1231 | 1 |
| BP | GO:0070613 | regulation of protein processing                              | 1/60 | 67/23328 | 0.1587 | 0.1231 | 1 |
| BP | GO:0090307 | mitotic spindle assembly                                      | 1/60 | 67/23328 | 0.1587 | 0.1231 | 1 |
| BP | GO:0002287 | alpha-beta T cell activation involved in immune response      | 1/60 | 68/23328 | 0.1609 | 0.1239 | 1 |
| BP | GO:0007566 | embryo implantation                                           | 1/60 | 68/23328 | 0.1609 | 0.1239 | 1 |
| BP | GO:0015800 | acidic amino acid transport                                   | 1/60 | 68/23328 | 0.1609 | 0.1239 | 1 |
| BP | GO:0030837 | negative regulation of actin filament polymerization          | 1/60 | 68/23328 | 0.1609 | 0.1239 | 1 |
| BP | GO:0032507 | maintenance of protein location in cell                       | 1/60 | 68/23328 | 0.1609 | 0.1239 | 1 |
| BP | GO:0046635 | positive regulation of alpha-beta T cell activation           | 1/60 | 68/23328 | 0.1609 | 0.1239 | 1 |
| BP | GO:0046637 | regulation of alpha-beta T cell differentiation               | 1/60 | 68/23328 | 0.1609 | 0.1239 | 1 |
| BP | GO:0050771 | negative regulation of axonogenesis                           | 1/60 | 68/23328 | 0.1609 | 0.1239 | 1 |
| BP | GO:0071868 | cellular response to monoamine stimulus                       | 1/60 | 68/23328 | 0.1609 | 0.1239 | 1 |
| BP | GO:0071870 | cellular response to catecholamine stimulus                   | 1/60 | 68/23328 | 0.1609 | 0.1239 | 1 |
| BP | GO:0097194 | execution phase of apoptosis                                  | 1/60 | 68/23328 | 0.1609 | 0.1239 | 1 |
| BP | GO:0099601 | regulation of neurotransmitter receptor activity              | 1/60 | 68/23328 | 0.1609 | 0.1239 | 1 |
| BP | GO:1901264 | carbohydrate derivative transport                             | 1/60 | 68/23328 | 0.1609 | 0.1239 | 1 |
| BP | GO:1902369 | negative regulation of RNA catabolic process                  | 1/60 | 68/23328 | 0.1609 | 0.1239 | 1 |
| BP | GO:0000281 | mitotic cytokinesis                                           | 1/60 | 69/23328 | 0.1630 | 0.1248 | 1 |
| BP | GO:0006801 | superoxide metabolic process                                  | 1/60 | 69/23328 | 0.1630 | 0.1248 | 1 |
| BP | GO:0021536 | diencephalon development                                      | 1/60 | 69/23328 | 0.1630 | 0.1248 | 1 |
| BP | GO:0033627 | cell adhesion mediated by integrin                            | 1/60 | 69/23328 | 0.1630 | 0.1248 | 1 |
| BP | GO:0061371 | determination of heart left/right asymmetry                   | 1/60 | 69/23328 | 0.1630 | 0.1248 | 1 |
| BP | GO:0071867 | response to monoamine                                         | 1/60 | 69/23328 | 0.1630 | 0.1248 | 1 |
| BP | GO:0071869 | response to catecholamine                                     | 1/60 | 69/23328 | 0.1630 | 0.1248 | 1 |
| BP | GO:1904377 | positive regulation of protein localization to cell periphery | 1/60 | 69/23328 | 0.1630 | 0.1248 | 1 |

|    |            |                                                                                      |      |          |        |        |   |
|----|------------|--------------------------------------------------------------------------------------|------|----------|--------|--------|---|
| BP | GO:0003143 | embryonic heart tube morphogenesis                                                   | 1/60 | 70/23328 | 0.1652 | 0.1259 | 1 |
| BP | GO:0006766 | vitamin metabolic process                                                            | 1/60 | 70/23328 | 0.1652 | 0.1259 | 1 |
| BP | GO:0007405 | neuroblast proliferation                                                             | 1/60 | 70/23328 | 0.1652 | 0.1259 | 1 |
| BP | GO:0030512 | negative regulation of transforming growth factor beta receptor signaling pathway    | 1/60 | 70/23328 | 0.1652 | 0.1259 | 1 |
| BP | GO:0045669 | positive regulation of osteoblast differentiation                                    | 1/60 | 70/23328 | 0.1652 | 0.1259 | 1 |
| BP | GO:0150076 | neuroinflammatory response                                                           | 1/60 | 70/23328 | 0.1652 | 0.1259 | 1 |
| BP | GO:1903317 | regulation of protein maturation                                                     | 1/60 | 70/23328 | 0.1652 | 0.1259 | 1 |
| BP | GO:2000179 | positive regulation of neural precursor cell proliferation                           | 1/60 | 70/23328 | 0.1652 | 0.1259 | 1 |
| BP | GO:0006635 | fatty acid beta-oxidation                                                            | 1/60 | 71/23328 | 0.1673 | 0.1271 | 1 |
| BP | GO:0007492 | endoderm development                                                                 | 1/60 | 71/23328 | 0.1673 | 0.1271 | 1 |
| BP | GO:0043113 | receptor clustering                                                                  | 1/60 | 71/23328 | 0.1673 | 0.1271 | 1 |
| BP | GO:0043407 | negative regulation of MAP kinase activity                                           | 1/60 | 71/23328 | 0.1673 | 0.1271 | 1 |
| BP | GO:0060675 | ureteric bud morphogenesis                                                           | 1/60 | 71/23328 | 0.1673 | 0.1271 | 1 |
| BP | GO:0061035 | regulation of cartilage development                                                  | 1/60 | 71/23328 | 0.1673 | 0.1271 | 1 |
| BP | GO:1901796 | regulation of signal transduction by p53 class mediator                              | 1/60 | 71/23328 | 0.1673 | 0.1271 | 1 |
| BP | GO:0010611 | regulation of cardiac muscle hypertrophy                                             | 1/60 | 72/23328 | 0.1695 | 0.1285 | 1 |
| BP | GO:0072171 | mesonephric tubule morphogenesis                                                     | 1/60 | 72/23328 | 0.1695 | 0.1285 | 1 |
| BP | GO:1903845 | negative regulation of cellular response to transforming growth factor beta stimulus | 1/60 | 72/23328 | 0.1695 | 0.1285 | 1 |
| BP | GO:0002711 | positive regulation of T cell mediated immunity                                      | 1/60 | 73/23328 | 0.1716 | 0.1298 | 1 |
| BP | GO:0002886 | regulation of myeloid leukocyte mediated immunity                                    | 1/60 | 73/23328 | 0.1716 | 0.1298 | 1 |
| BP | GO:0042130 | negative regulation of T cell proliferation                                          | 1/60 | 73/23328 | 0.1716 | 0.1298 | 1 |
| BP | GO:0043627 | response to estrogen                                                                 | 1/60 | 73/23328 | 0.1716 | 0.1298 | 1 |
| BP | GO:0051155 | positive regulation of striated muscle cell differentiation                          | 1/60 | 73/23328 | 0.1716 | 0.1298 | 1 |
| BP | GO:0002292 | T cell differentiation involved in immune response                                   | 1/60 | 74/23328 | 0.1738 | 0.1310 | 1 |

|    |            |                                                                         |      |          |        |        |   |
|----|------------|-------------------------------------------------------------------------|------|----------|--------|--------|---|
| BP | GO:0007029 | endoplasmic reticulum organization                                      | 1/60 | 74/23328 | 0.1738 | 0.1310 | 1 |
| BP | GO:0007422 | peripheral nervous system development                                   | 1/60 | 74/23328 | 0.1738 | 0.1310 | 1 |
| BP | GO:0043299 | leukocyte degranulation                                                 | 1/60 | 74/23328 | 0.1738 | 0.1310 | 1 |
| BP | GO:2001021 | negative regulation of response to DNA damage stimulus                  | 1/60 | 74/23328 | 0.1738 | 0.1310 | 1 |
| BP | GO:0014743 | regulation of muscle hypertrophy                                        | 1/60 | 75/23328 | 0.1759 | 0.1319 | 1 |
| BP | GO:0032642 | regulation of chemokine production                                      | 1/60 | 75/23328 | 0.1759 | 0.1319 | 1 |
| BP | GO:0034109 | homotypic cell-cell adhesion                                            | 1/60 | 75/23328 | 0.1759 | 0.1319 | 1 |
| BP | GO:0046626 | regulation of insulin receptor signaling pathway                        | 1/60 | 75/23328 | 0.1759 | 0.1319 | 1 |
| BP | GO:0051145 | smooth muscle cell differentiation                                      | 1/60 | 75/23328 | 0.1759 | 0.1319 | 1 |
| BP | GO:0097755 | positive regulation of blood vessel diameter                            | 1/60 | 75/23328 | 0.1759 | 0.1319 | 1 |
| BP | GO:0098661 | inorganic anion transmembrane transport                                 | 1/60 | 75/23328 | 0.1759 | 0.1319 | 1 |
| BP | GO:1903725 | regulation of phospholipid metabolic process                            | 1/60 | 75/23328 | 0.1759 | 0.1319 | 1 |
| BP | GO:0000079 | regulation of cyclin-dependent protein serine/threonine kinase activity | 1/60 | 76/23328 | 0.1780 | 0.1331 | 1 |
| BP | GO:0045576 | mast cell activation                                                    | 1/60 | 76/23328 | 0.1780 | 0.1331 | 1 |
| BP | GO:0050663 | cytokine secretion                                                      | 1/60 | 76/23328 | 0.1780 | 0.1331 | 1 |
| BP | GO:0051865 | protein autoubiquitination                                              | 1/60 | 76/23328 | 0.1780 | 0.1331 | 1 |
| BP | GO:1901606 | alpha-amino acid catabolic process                                      | 1/60 | 76/23328 | 0.1780 | 0.1331 | 1 |
| BP | GO:0010822 | positive regulation of mitochondrion organization                       | 1/60 | 77/23328 | 0.1801 | 0.1343 | 1 |
| BP | GO:0016575 | histone deacetylation                                                   | 1/60 | 77/23328 | 0.1801 | 0.1343 | 1 |
| BP | GO:0030433 | ubiquitin-dependent ERAD pathway                                        | 1/60 | 77/23328 | 0.1801 | 0.1343 | 1 |
| BP | GO:0045843 | negative regulation of striated muscle tissue development               | 1/60 | 77/23328 | 0.1801 | 0.1343 | 1 |
| BP | GO:0071277 | cellular response to calcium ion                                        | 1/60 | 77/23328 | 0.1801 | 0.1343 | 1 |
| BP | GO:1901224 | positive regulation of NIK/NF-kappaB signaling                          | 1/60 | 77/23328 | 0.1801 | 0.1343 | 1 |
| BP | GO:0003208 | cardiac ventricle morphogenesis                                         | 1/60 | 78/23328 | 0.1823 | 0.1354 | 1 |



|    |            |                                                                    |      |          |        |        |   |
|----|------------|--------------------------------------------------------------------|------|----------|--------|--------|---|
| BP | GO:0032088 | negative regulation of NF-kappaB transcription factor activity     | 1/60 | 78/23328 | 0.1823 | 0.1354 | 1 |
| BP | GO:0050000 | chromosome localization                                            | 1/60 | 78/23328 | 0.1823 | 0.1354 | 1 |
| BP | GO:0051303 | establishment of chromosome localization                           | 1/60 | 78/23328 | 0.1823 | 0.1354 | 1 |
| BP | GO:0061180 | mammary gland epithelium development                               | 1/60 | 78/23328 | 0.1823 | 0.1354 | 1 |
| BP | GO:0032418 | lysosome localization                                              | 1/60 | 79/23328 | 0.1844 | 0.1364 | 1 |
| BP | GO:0032602 | chemokine production                                               | 1/60 | 79/23328 | 0.1844 | 0.1364 | 1 |
| BP | GO:0034644 | cellular response to UV                                            | 1/60 | 79/23328 | 0.1844 | 0.1364 | 1 |
| BP | GO:0045471 | response to ethanol                                                | 1/60 | 79/23328 | 0.1844 | 0.1364 | 1 |
| BP | GO:0051966 | regulation of synaptic transmission, glutamatergic                 | 1/60 | 79/23328 | 0.1844 | 0.1364 | 1 |
| BP | GO:0055021 | regulation of cardiac muscle tissue growth                         | 1/60 | 79/23328 | 0.1844 | 0.1364 | 1 |
| BP | GO:0032729 | positive regulation of interferon-gamma production                 | 1/60 | 80/23328 | 0.1865 | 0.1375 | 1 |
| BP | GO:0050688 | regulation of defense response to virus                            | 1/60 | 80/23328 | 0.1865 | 0.1375 | 1 |
| BP | GO:0072078 | nephron tubule morphogenesis                                       | 1/60 | 80/23328 | 0.1865 | 0.1375 | 1 |
| BP | GO:1901862 | negative regulation of muscle tissue development                   | 1/60 | 80/23328 | 0.1865 | 0.1375 | 1 |
| BP | GO:1901880 | negative regulation of protein depolymerization                    | 1/60 | 80/23328 | 0.1865 | 0.1375 | 1 |
| BP | GO:1904029 | regulation of cyclin-dependent protein kinase activity             | 1/60 | 80/23328 | 0.1865 | 0.1375 | 1 |
| BP | GO:0045682 | regulation of epidermis development                                | 1/60 | 81/23328 | 0.1886 | 0.1390 | 1 |
| BP | GO:0019915 | lipid storage                                                      | 1/60 | 82/23328 | 0.1907 | 0.1401 | 1 |
| BP | GO:0030193 | regulation of blood coagulation                                    | 1/60 | 82/23328 | 0.1907 | 0.1401 | 1 |
| BP | GO:0050805 | negative regulation of synaptic transmission                       | 1/60 | 82/23328 | 0.1907 | 0.1401 | 1 |
| BP | GO:0051262 | protein tetramerization                                            | 1/60 | 82/23328 | 0.1907 | 0.1401 | 1 |
| BP | GO:0072088 | nephron epithelium morphogenesis                                   | 1/60 | 82/23328 | 0.1907 | 0.1401 | 1 |
| BP | GO:0002532 | production of molecular mediator involved in inflammatory response | 1/60 | 83/23328 | 0.1928 | 0.1410 | 1 |
| BP | GO:0030168 | platelet activation                                                | 1/60 | 83/23328 | 0.1928 | 0.1410 | 1 |
| BP | GO:0032272 | negative regulation of protein polymerization                      | 1/60 | 83/23328 | 0.1928 | 0.1410 | 1 |

|    |            |                                                                                      |      |          |        |        |   |
|----|------------|--------------------------------------------------------------------------------------|------|----------|--------|--------|---|
| BP | GO:0044106 | cellular amine metabolic process                                                     | 1/60 | 83/23328 | 0.1928 | 0.1410 | 1 |
| BP | GO:0061178 | regulation of insulin secretion<br>involved in cellular response to glucose stimulus | 1/60 | 83/23328 | 0.1928 | 0.1410 | 1 |
| BP | GO:0072384 | organelle transport along microtubule                                                | 1/60 | 83/23328 | 0.1928 | 0.1410 | 1 |
| BP | GO:1900046 | regulation of hemostasis                                                             | 1/60 | 83/23328 | 0.1928 | 0.1410 | 1 |
| BP | GO:1903901 | negative regulation of viral life cycle                                              | 1/60 | 83/23328 | 0.1928 | 0.1410 | 1 |
| BP | GO:0003151 | outflow tract morphogenesis                                                          | 1/60 | 84/23328 | 0.1948 | 0.1422 | 1 |
| BP | GO:0014032 | neural crest cell development                                                        | 1/60 | 84/23328 | 0.1948 | 0.1422 | 1 |
| BP | GO:0030148 | sphingolipid biosynthetic process                                                    | 1/60 | 84/23328 | 0.1948 | 0.1422 | 1 |
| BP | GO:0050766 | positive regulation of phagocytosis                                                  | 1/60 | 84/23328 | 0.1948 | 0.1422 | 1 |
| BP | GO:0072028 | nephron morphogenesis                                                                | 1/60 | 84/23328 | 0.1948 | 0.1422 | 1 |
| BP | GO:0006835 | dicarboxylic acid transport                                                          | 1/60 | 85/23328 | 0.1969 | 0.1433 | 1 |
| BP | GO:0030203 | glycosaminoglycan metabolic process                                                  | 1/60 | 85/23328 | 0.1969 | 0.1433 | 1 |
| BP | GO:0043367 | CD4-positive, alpha-beta T cell differentiation                                      | 1/60 | 85/23328 | 0.1969 | 0.1433 | 1 |
| BP | GO:0006970 | response to osmotic stress                                                           | 1/60 | 86/23328 | 0.1990 | 0.1441 | 1 |
| BP | GO:0035050 | embryonic heart tube development                                                     | 1/60 | 86/23328 | 0.1990 | 0.1441 | 1 |
| BP | GO:0048708 | astrocyte differentiation                                                            | 1/60 | 86/23328 | 0.1990 | 0.1441 | 1 |
| BP | GO:0050818 | regulation of coagulation                                                            | 1/60 | 86/23328 | 0.1990 | 0.1441 | 1 |
| BP | GO:0061333 | renal tubule morphogenesis                                                           | 1/60 | 86/23328 | 0.1990 | 0.1441 | 1 |
| BP | GO:0097581 | lamellipodium organization                                                           | 1/60 | 86/23328 | 0.1990 | 0.1441 | 1 |
| BP | GO:1905897 | regulation of response to endoplasmic reticulum stress                               | 1/60 | 86/23328 | 0.1990 | 0.1441 | 1 |
| BP | GO:0060420 | regulation of heart growth                                                           | 1/60 | 87/23328 | 0.2011 | 0.1456 | 1 |
| BP | GO:0006112 | energy reserve metabolic process                                                     | 1/60 | 88/23328 | 0.2031 | 0.1465 | 1 |
| BP | GO:0010827 | regulation of glucose transmembrane transport                                        | 1/60 | 88/23328 | 0.2031 | 0.1465 | 1 |
| BP | GO:0035914 | skeletal muscle cell differentiation                                                 | 1/60 | 88/23328 | 0.2031 | 0.1465 | 1 |
| BP | GO:0050672 | negative regulation of lymphocyte proliferation                                      | 1/60 | 88/23328 | 0.2031 | 0.1465 | 1 |
| BP | GO:0060079 | excitatory postsynaptic potential                                                    | 1/60 | 88/23328 | 0.2031 | 0.1465 | 1 |

|    |            |                                                                     |      |          |        |        |   |
|----|------------|---------------------------------------------------------------------|------|----------|--------|--------|---|
| BP | GO:0062207 | regulation of pattern recognition receptor signaling pathway        | 1/60 | 88/23328 | 0.2031 | 0.1465 | 1 |
| BP | GO:1903312 | negative regulation of mRNA metabolic process                       | 1/60 | 88/23328 | 0.2031 | 0.1465 | 1 |
| BP | GO:0014031 | mesenchymal cell development                                        | 1/60 | 89/23328 | 0.2052 | 0.1476 | 1 |
| BP | GO:0032945 | negative regulation of mononuclear cell proliferation               | 1/60 | 89/23328 | 0.2052 | 0.1476 | 1 |
| BP | GO:0042770 | signal transduction in response to DNA damage                       | 1/60 | 89/23328 | 0.2052 | 0.1476 | 1 |
| BP | GO:0051149 | positive regulation of muscle cell differentiation                  | 1/60 | 89/23328 | 0.2052 | 0.1476 | 1 |
| BP | GO:0051702 | interaction with symbiont                                           | 1/60 | 89/23328 | 0.2052 | 0.1476 | 1 |
| BP | GO:0006672 | ceramide metabolic process                                          | 1/60 | 90/23328 | 0.2072 | 0.1485 | 1 |
| BP | GO:0009063 | cellular amino acid catabolic process                               | 1/60 | 90/23328 | 0.2072 | 0.1485 | 1 |
| BP | GO:0019226 | transmission of nerve impulse                                       | 1/60 | 90/23328 | 0.2072 | 0.1485 | 1 |
| BP | GO:0043242 | negative regulation of protein-containing complex disassembly       | 1/60 | 90/23328 | 0.2072 | 0.1485 | 1 |
| BP | GO:0046888 | negative regulation of hormone secretion                            | 1/60 | 90/23328 | 0.2072 | 0.1485 | 1 |
| BP | GO:0048864 | stem cell development                                               | 1/60 | 90/23328 | 0.2072 | 0.1485 | 1 |
| BP | GO:1900076 | regulation of cellular response to insulin stimulus                 | 1/60 | 90/23328 | 0.2072 | 0.1485 | 1 |
| BP | GO:0001938 | positive regulation of endothelial cell proliferation               | 1/60 | 91/23328 | 0.2093 | 0.1495 | 1 |
| BP | GO:0002088 | lens development in camera-type eye                                 | 1/60 | 91/23328 | 0.2093 | 0.1495 | 1 |
| BP | GO:0014033 | neural crest cell differentiation                                   | 1/60 | 91/23328 | 0.2093 | 0.1495 | 1 |
| BP | GO:0040014 | regulation of multicellular organism growth                         | 1/60 | 91/23328 | 0.2093 | 0.1495 | 1 |
| BP | GO:0042632 | cholesterol homeostasis                                             | 1/60 | 91/23328 | 0.2093 | 0.1495 | 1 |
| BP | GO:0072091 | regulation of stem cell proliferation                               | 1/60 | 91/23328 | 0.2093 | 0.1495 | 1 |
| BP | GO:0000045 | autophagosome assembly                                              | 1/60 | 92/23328 | 0.2113 | 0.1504 | 1 |
| BP | GO:0002275 | myeloid cell activation involved in immune response                 | 1/60 | 92/23328 | 0.2113 | 0.1504 | 1 |
| BP | GO:0002832 | negative regulation of response to biotic stimulus                  | 1/60 | 92/23328 | 0.2113 | 0.1504 | 1 |
| BP | GO:0035773 | insulin secretion involved in cellular response to glucose stimulus | 1/60 | 92/23328 | 0.2113 | 0.1504 | 1 |

|    |            |                                                      |      |          |        |        |   |
|----|------------|------------------------------------------------------|------|----------|--------|--------|---|
| BP | GO:0045685 | regulation of glial cell differentiation             | 1/60 | 92/23328 | 0.2113 | 0.1504 | 1 |
| BP | GO:0055092 | sterol homeostasis                                   | 1/60 | 92/23328 | 0.2113 | 0.1504 | 1 |
| BP | GO:0002028 | regulation of sodium ion transport                   | 1/60 | 93/23328 | 0.2134 | 0.1516 | 1 |
| BP | GO:0007215 | glutamate receptor signaling pathway                 | 1/60 | 93/23328 | 0.2134 | 0.1516 | 1 |
| BP | GO:0009308 | amine metabolic process                              | 1/60 | 93/23328 | 0.2134 | 0.1516 | 1 |
| BP | GO:0033077 | T cell differentiation in thymus                     | 1/60 | 93/23328 | 0.2134 | 0.1516 | 1 |
| BP | GO:0010717 | regulation of epithelial to mesenchymal transition   | 1/60 | 94/23328 | 0.2154 | 0.1526 | 1 |
| BP | GO:0061640 | cytoskeleton-dependent cytokinesis                   | 1/60 | 94/23328 | 0.2154 | 0.1526 | 1 |
| BP | GO:0070664 | negative regulation of leukocyte proliferation       | 1/60 | 94/23328 | 0.2154 | 0.1526 | 1 |
| BP | GO:1901879 | regulation of protein depolymerization               | 1/60 | 94/23328 | 0.2154 | 0.1526 | 1 |
| BP | GO:1903313 | positive regulation of mRNA metabolic process        | 1/60 | 94/23328 | 0.2154 | 0.1526 | 1 |
| BP | GO:0002251 | organ or tissue specific immune response             | 1/60 | 95/23328 | 0.2174 | 0.1539 | 1 |
| BP | GO:0055013 | cardiac muscle cell development                      | 1/60 | 95/23328 | 0.2174 | 0.1539 | 1 |
| BP | GO:0002690 | positive regulation of leukocyte chemotaxis          | 1/60 | 96/23328 | 0.2194 | 0.1551 | 1 |
| BP | GO:0030838 | positive regulation of actin filament polymerization | 1/60 | 96/23328 | 0.2194 | 0.1551 | 1 |
| BP | GO:0045638 | negative regulation of myeloid cell differentiation  | 1/60 | 96/23328 | 0.2194 | 0.1551 | 1 |
| BP | GO:0002027 | regulation of heart rate                             | 1/60 | 97/23328 | 0.2215 | 0.1562 | 1 |
| BP | GO:0010660 | regulation of muscle cell apoptotic process          | 1/60 | 97/23328 | 0.2215 | 0.1562 | 1 |
| BP | GO:0045069 | regulation of viral genome replication               | 1/60 | 97/23328 | 0.2215 | 0.1562 | 1 |
| BP | GO:1905037 | autophagosome organization                           | 1/60 | 97/23328 | 0.2215 | 0.1562 | 1 |
| BP | GO:0030279 | negative regulation of ossification                  | 1/60 | 98/23328 | 0.2235 | 0.1572 | 1 |
| BP | GO:0045833 | negative regulation of lipid metabolic process       | 1/60 | 98/23328 | 0.2235 | 0.1572 | 1 |
| BP | GO:0071482 | cellular response to light stimulus                  | 1/60 | 98/23328 | 0.2235 | 0.1572 | 1 |
| BP | GO:0072080 | nephron tubule development                           | 1/60 | 98/23328 | 0.2235 | 0.1572 | 1 |

|    |            |                                                                             |      |           |        |        |   |
|----|------------|-----------------------------------------------------------------------------|------|-----------|--------|--------|---|
| BP | GO:0099565 | chemical synaptic transmission,<br>postsynaptic                             | 1/60 | 98/23328  | 0.2235 | 0.1572 | 1 |
| BP | GO:0006805 | xenobiotic metabolic process                                                | 1/60 | 99/23328  | 0.2255 | 0.1583 | 1 |
| BP | GO:0036503 | ERAD pathway                                                                | 1/60 | 99/23328  | 0.2255 | 0.1583 | 1 |
| BP | GO:0043502 | regulation of muscle adaptation                                             | 1/60 | 99/23328  | 0.2255 | 0.1583 | 1 |
| BP | GO:0045185 | maintenance of protein location                                             | 1/60 | 99/23328  | 0.2255 | 0.1583 | 1 |
| BP | GO:0006476 | protein deacetylation                                                       | 1/60 | 100/23328 | 0.2275 | 0.1593 | 1 |
| BP | GO:0010771 | negative regulation of cell<br>morphogenesis involved in<br>differentiation | 1/60 | 100/23328 | 0.2275 | 0.1593 | 1 |
| BP | GO:0042102 | positive regulation of T cell<br>proliferation                              | 1/60 | 100/23328 | 0.2275 | 0.1593 | 1 |
| BP | GO:0042116 | macrophage activation                                                       | 1/60 | 100/23328 | 0.2275 | 0.1593 | 1 |
| BP | GO:0009062 | fatty acid catabolic process                                                | 1/60 | 101/23328 | 0.2295 | 0.1600 | 1 |
| BP | GO:0031058 | positive regulation of histone<br>modification                              | 1/60 | 101/23328 | 0.2295 | 0.1600 | 1 |
| BP | GO:0032092 | positive regulation of protein<br>binding                                   | 1/60 | 101/23328 | 0.2295 | 0.1600 | 1 |
| BP | GO:0032755 | positive regulation of<br>interleukin-6 production                          | 1/60 | 101/23328 | 0.2295 | 0.1600 | 1 |
| BP | GO:0033555 | multicellular organismal<br>response to stress                              | 1/60 | 101/23328 | 0.2295 | 0.1600 | 1 |
| BP | GO:0055006 | cardiac cell development                                                    | 1/60 | 101/23328 | 0.2295 | 0.1600 | 1 |
| BP | GO:0060993 | kidney morphogenesis                                                        | 1/60 | 101/23328 | 0.2295 | 0.1600 | 1 |
| BP | GO:0001704 | formation of primary germ layer                                             | 1/60 | 102/23328 | 0.2315 | 0.1610 | 1 |
| BP | GO:0007006 | mitochondrial membrane<br>organization                                      | 1/60 | 102/23328 | 0.2315 | 0.1610 | 1 |
| BP | GO:0010657 | muscle cell apoptotic process                                               | 1/60 | 102/23328 | 0.2315 | 0.1610 | 1 |
| BP | GO:0035418 | protein localization to synapse                                             | 1/60 | 102/23328 | 0.2315 | 0.1610 | 1 |
| BP | GO:0045582 | positive regulation of T cell<br>differentiation                            | 1/60 | 102/23328 | 0.2315 | 0.1610 | 1 |
| BP | GO:0003300 | cardiac muscle hypertrophy                                                  | 1/60 | 103/23328 | 0.2334 | 0.1621 | 1 |
| BP | GO:0006821 | chloride transport                                                          | 1/60 | 103/23328 | 0.2334 | 0.1621 | 1 |
| BP | GO:0055024 | regulation of cardiac muscle<br>tissue development                          | 1/60 | 103/23328 | 0.2334 | 0.1621 | 1 |
| BP | GO:0071466 | cellular response to xenobiotic<br>stimulus                                 | 1/60 | 103/23328 | 0.2334 | 0.1621 | 1 |
| BP | GO:0001657 | ureteric bud development                                                    | 1/60 | 104/23328 | 0.2354 | 0.1627 | 1 |
| BP | GO:0006413 | translational initiation                                                    | 1/60 | 104/23328 | 0.2354 | 0.1627 | 1 |
| BP | GO:0043488 | regulation of mRNA stability                                                | 1/60 | 104/23328 | 0.2354 | 0.1627 | 1 |
| BP | GO:0061326 | renal tubule development                                                    | 1/60 | 104/23328 | 0.2354 | 0.1627 | 1 |

|    |            |                                                                            |      |           |        |        |   |
|----|------------|----------------------------------------------------------------------------|------|-----------|--------|--------|---|
| BP | GO:0072163 | mesonephric epithelium development                                         | 1/60 | 104/23328 | 0.2354 | 0.1627 | 1 |
| BP | GO:0072164 | mesonephric tubule development                                             | 1/60 | 104/23328 | 0.2354 | 0.1627 | 1 |
| BP | GO:1901222 | regulation of NIK/NF-kappaB signaling                                      | 1/60 | 104/23328 | 0.2354 | 0.1627 | 1 |
| BP | GO:1902106 | negative regulation of leukocyte differentiation                           | 1/60 | 104/23328 | 0.2354 | 0.1627 | 1 |
| BP | GO:0000077 | DNA damage checkpoint                                                      | 1/60 | 105/23328 | 0.2374 | 0.1639 | 1 |
| BP | GO:0002444 | myeloid leukocyte mediated immunity                                        | 1/60 | 105/23328 | 0.2374 | 0.1639 | 1 |
| BP | GO:0006022 | aminoglycan metabolic process                                              | 1/60 | 106/23328 | 0.2394 | 0.1650 | 1 |
| BP | GO:0021510 | spinal cord development                                                    | 1/60 | 106/23328 | 0.2394 | 0.1650 | 1 |
| BP | GO:0110110 | positive regulation of animal organ morphogenesis                          | 1/60 | 106/23328 | 0.2394 | 0.1650 | 1 |
| BP | GO:0001823 | mesonephros development                                                    | 1/60 | 107/23328 | 0.2413 | 0.1658 | 1 |
| BP | GO:0014897 | striated muscle hypertrophy                                                | 1/60 | 107/23328 | 0.2413 | 0.1658 | 1 |
| BP | GO:0019395 | fatty acid oxidation                                                       | 1/60 | 107/23328 | 0.2413 | 0.1658 | 1 |
| BP | GO:0050709 | negative regulation of protein secretion                                   | 1/60 | 107/23328 | 0.2413 | 0.1658 | 1 |
| BP | GO:0090174 | organelle membrane fusion                                                  | 1/60 | 107/23328 | 0.2413 | 0.1658 | 1 |
| BP | GO:0000956 | nuclear-transcribed mRNA catabolic process                                 | 1/60 | 108/23328 | 0.2433 | 0.1665 | 1 |
| BP | GO:0002224 | toll-like receptor signaling pathway                                       | 1/60 | 108/23328 | 0.2433 | 0.1665 | 1 |
| BP | GO:0006641 | triglyceride metabolic process                                             | 1/60 | 108/23328 | 0.2433 | 0.1665 | 1 |
| BP | GO:0021987 | cerebral cortex development                                                | 1/60 | 108/23328 | 0.2433 | 0.1665 | 1 |
| BP | GO:0045446 | endothelial cell differentiation                                           | 1/60 | 108/23328 | 0.2433 | 0.1665 | 1 |
| BP | GO:0045639 | positive regulation of myeloid cell differentiation                        | 1/60 | 108/23328 | 0.2433 | 0.1665 | 1 |
| BP | GO:0048704 | embryonic skeletal system morphogenesis                                    | 1/60 | 108/23328 | 0.2433 | 0.1665 | 1 |
| BP | GO:0055017 | cardiac muscle tissue growth                                               | 1/60 | 108/23328 | 0.2433 | 0.1665 | 1 |
| BP | GO:0001959 | regulation of cytokine-mediated signaling pathway                          | 1/60 | 109/23328 | 0.2452 | 0.1671 | 1 |
| BP | GO:0002062 | chondrocyte differentiation                                                | 1/60 | 109/23328 | 0.2452 | 0.1671 | 1 |
| BP | GO:0002702 | positive regulation of production of molecular mediator of immune response | 1/60 | 109/23328 | 0.2452 | 0.1671 | 1 |
| BP | GO:0014896 | muscle hypertrophy                                                         | 1/60 | 109/23328 | 0.2452 | 0.1671 | 1 |
| BP | GO:0021549 | cerebellum development                                                     | 1/60 | 109/23328 | 0.2452 | 0.1671 | 1 |

|    |            |                                                                                                          |      |           |        |        |   |
|----|------------|----------------------------------------------------------------------------------------------------------|------|-----------|--------|--------|---|
| BP | GO:0035249 | synaptic transmission,<br>glutamatergic                                                                  | 1/60 | 109/23328 | 0.2452 | 0.1671 | 1 |
| BP | GO:0051028 | mRNA transport                                                                                           | 1/60 | 109/23328 | 0.2452 | 0.1671 | 1 |
| BP | GO:0051668 | localization within membrane                                                                             | 1/60 | 109/23328 | 0.2452 | 0.1671 | 1 |
| BP | GO:1900006 | positive regulation of dendrite<br>development                                                           | 1/60 | 109/23328 | 0.2452 | 0.1671 | 1 |
| BP | GO:1905477 | positive regulation of protein<br>localization to membrane                                               | 1/60 | 109/23328 | 0.2452 | 0.1671 | 1 |
| BP | GO:0006275 | regulation of DNA replication                                                                            | 1/60 | 110/23328 | 0.2472 | 0.1682 | 1 |
| BP | GO:0038061 | NIK/NF-kappaB signaling                                                                                  | 1/60 | 110/23328 | 0.2472 | 0.1682 | 1 |
| BP | GO:0035601 | protein deacylation                                                                                      | 1/60 | 111/23328 | 0.2491 | 0.1693 | 1 |
| BP | GO:0072009 | nephron epithelium<br>development                                                                        | 1/60 | 111/23328 | 0.2491 | 0.1693 | 1 |
| BP | GO:0098732 | macromolecule deacylation                                                                                | 1/60 | 111/23328 | 0.2491 | 0.1693 | 1 |
| BP | GO:0007009 | plasma membrane organization                                                                             | 1/60 | 112/23328 | 0.2511 | 0.1705 | 1 |
| BP | GO:0051225 | spindle assembly                                                                                         | 1/60 | 112/23328 | 0.2511 | 0.1705 | 1 |
| BP | GO:0031570 | DNA integrity checkpoint                                                                                 | 1/60 | 113/23328 | 0.2530 | 0.1717 | 1 |
| BP | GO:0001892 | embryonic placenta<br>development                                                                        | 1/60 | 114/23328 | 0.2549 | 0.1724 | 1 |
| BP | GO:0006939 | smooth muscle contraction                                                                                | 1/60 | 114/23328 | 0.2549 | 0.1724 | 1 |
| BP | GO:0032649 | regulation of interferon-gamma<br>production                                                             | 1/60 | 114/23328 | 0.2549 | 0.1724 | 1 |
| BP | GO:0060078 | regulation of postsynaptic<br>membrane potential                                                         | 1/60 | 114/23328 | 0.2549 | 0.1724 | 1 |
| BP | GO:0071346 | cellular response to interferon-<br>gamma                                                                | 1/60 | 114/23328 | 0.2549 | 0.1724 | 1 |
| BP | GO:1903076 | regulation of protein<br>localization to plasma<br>membrane                                              | 1/60 | 114/23328 | 0.2549 | 0.1724 | 1 |
| BP | GO:0016579 | protein deubiquitination                                                                                 | 1/60 | 115/23328 | 0.2569 | 0.1734 | 1 |
| BP | GO:0019079 | viral genome replication                                                                                 | 1/60 | 115/23328 | 0.2569 | 0.1734 | 1 |
| BP | GO:0019751 | polyol metabolic process                                                                                 | 1/60 | 115/23328 | 0.2569 | 0.1734 | 1 |
| BP | GO:0090100 | positive regulation of<br>transmembrane receptor protein<br>serine/threonine kinase<br>signaling pathway | 1/60 | 115/23328 | 0.2569 | 0.1734 | 1 |
| BP | GO:0002792 | negative regulation of peptide<br>secretion                                                              | 1/60 | 116/23328 | 0.2588 | 0.1742 | 1 |
| BP | GO:0007052 | mitotic spindle organization                                                                             | 1/60 | 116/23328 | 0.2588 | 0.1742 | 1 |
| BP | GO:0034968 | histone lysine methylation                                                                               | 1/60 | 116/23328 | 0.2588 | 0.1742 | 1 |
| BP | GO:0042472 | inner ear morphogenesis                                                                                  | 1/60 | 116/23328 | 0.2588 | 0.1742 | 1 |
| BP | GO:0043487 | regulation of RNA stability                                                                              | 1/60 | 116/23328 | 0.2588 | 0.1742 | 1 |

|    |            |                                                                                                 |      |           |        |        |   |
|----|------------|-------------------------------------------------------------------------------------------------|------|-----------|--------|--------|---|
| BP | GO:0051952 | regulation of amine transport                                                                   | 1/60 | 116/23328 | 0.2588 | 0.1742 | 1 |
| BP | GO:0006612 | protein targeting to membrane                                                                   | 1/60 | 117/23328 | 0.2607 | 0.1751 | 1 |
| BP | GO:0045621 | positive regulation of lymphocyte differentiation                                               | 1/60 | 117/23328 | 0.2607 | 0.1751 | 1 |
| BP | GO:1905269 | positive regulation of chromatin organization                                                   | 1/60 | 117/23328 | 0.2607 | 0.1751 | 1 |
| BP | GO:0014020 | primary neural tube formation                                                                   | 1/60 | 118/23328 | 0.2626 | 0.1758 | 1 |
| BP | GO:0018107 | peptidyl-threonine phosphorylation                                                              | 1/60 | 118/23328 | 0.2626 | 0.1758 | 1 |
| BP | GO:0021782 | glial cell development                                                                          | 1/60 | 118/23328 | 0.2626 | 0.1758 | 1 |
| BP | GO:0046632 | alpha-beta T cell differentiation                                                               | 1/60 | 118/23328 | 0.2626 | 0.1758 | 1 |
| BP | GO:0060419 | heart growth                                                                                    | 1/60 | 118/23328 | 0.2626 | 0.1758 | 1 |
| BP | GO:2000177 | regulation of neural precursor cell proliferation                                               | 1/60 | 118/23328 | 0.2626 | 0.1758 | 1 |
| BP | GO:0000187 | activation of MAPK activity                                                                     | 1/60 | 119/23328 | 0.2645 | 0.1768 | 1 |
| BP | GO:0060759 | regulation of response to cytokine stimulus                                                     | 1/60 | 119/23328 | 0.2645 | 0.1768 | 1 |
| BP | GO:2000278 | regulation of DNA biosynthetic process                                                          | 1/60 | 119/23328 | 0.2645 | 0.1768 | 1 |
| BP | GO:0015837 | amine transport                                                                                 | 1/60 | 121/23328 | 0.2683 | 0.1788 | 1 |
| BP | GO:0022037 | metencephalon development                                                                       | 1/60 | 121/23328 | 0.2683 | 0.1788 | 1 |
| BP | GO:0046467 | membrane lipid biosynthetic process                                                             | 1/60 | 121/23328 | 0.2683 | 0.1788 | 1 |
| BP | GO:0046620 | regulation of organ growth                                                                      | 1/60 | 121/23328 | 0.2683 | 0.1788 | 1 |
| BP | GO:0072329 | monocarboxylic acid catabolic process                                                           | 1/60 | 121/23328 | 0.2683 | 0.1788 | 1 |
| BP | GO:1901136 | carbohydrate derivative catabolic process                                                       | 1/60 | 121/23328 | 0.2683 | 0.1788 | 1 |
| BP | GO:0007098 | centrosome cycle                                                                                | 1/60 | 122/23328 | 0.2702 | 0.1795 | 1 |
| BP | GO:0031109 | microtubule polymerization or depolymerization                                                  | 1/60 | 122/23328 | 0.2702 | 0.1795 | 1 |
| BP | GO:0045807 | positive regulation of endocytosis                                                              | 1/60 | 122/23328 | 0.2702 | 0.1795 | 1 |
| BP | GO:0050868 | negative regulation of T cell activation                                                        | 1/60 | 122/23328 | 0.2702 | 0.1795 | 1 |
| BP | GO:0090101 | negative regulation of transmembrane receptor protein serine/threonine kinase signaling pathway | 1/60 | 122/23328 | 0.2702 | 0.1795 | 1 |
| BP | GO:1903828 | negative regulation of cellular protein localization                                            | 1/60 | 122/23328 | 0.2702 | 0.1795 | 1 |



|    |            |                                                                         |      |           |        |        |   |
|----|------------|-------------------------------------------------------------------------|------|-----------|--------|--------|---|
| BP | GO:0008286 | insulin receptor signaling pathway                                      | 1/60 | 123/23328 | 0.2721 | 0.1805 | 1 |
| BP | GO:0048565 | digestive tract development                                             | 1/60 | 123/23328 | 0.2721 | 0.1805 | 1 |
| BP | GO:0051261 | protein depolymerization                                                | 1/60 | 123/23328 | 0.2721 | 0.1805 | 1 |
| BP | GO:0006997 | nucleus organization                                                    | 1/60 | 124/23328 | 0.2740 | 0.1816 | 1 |
| BP | GO:0043500 | muscle adaptation                                                       | 1/60 | 124/23328 | 0.2740 | 0.1816 | 1 |
| BP | GO:0010212 | response to ionizing radiation                                          | 1/60 | 125/23328 | 0.2759 | 0.1826 | 1 |
| BP | GO:0043123 | positive regulation of I-kappaB kinase/NF-kappaB signaling              | 1/60 | 125/23328 | 0.2759 | 0.1826 | 1 |
| BP | GO:1902414 | protein localization to cell junction                                   | 1/60 | 125/23328 | 0.2759 | 0.1826 | 1 |
| BP | GO:0051053 | negative regulation of DNA metabolic process                            | 1/60 | 126/23328 | 0.2777 | 0.1837 | 1 |
| BP | GO:1901216 | positive regulation of neuron death                                     | 1/60 | 126/23328 | 0.2777 | 0.1837 | 1 |
| BP | GO:0008277 | regulation of G protein-coupled receptor signaling pathway              | 1/60 | 127/23328 | 0.2796 | 0.1845 | 1 |
| BP | GO:0014902 | myotube differentiation                                                 | 1/60 | 127/23328 | 0.2796 | 0.1845 | 1 |
| BP | GO:0018210 | peptidyl-threonine modification                                         | 1/60 | 127/23328 | 0.2796 | 0.1845 | 1 |
| BP | GO:0051101 | regulation of DNA binding                                               | 1/60 | 127/23328 | 0.2796 | 0.1845 | 1 |
| BP | GO:0060996 | dendritic spine development                                             | 1/60 | 127/23328 | 0.2796 | 0.1845 | 1 |
| BP | GO:0010811 | positive regulation of cell-substrate adhesion                          | 1/60 | 128/23328 | 0.2815 | 0.1852 | 1 |
| BP | GO:0032609 | interferon-gamma production                                             | 1/60 | 128/23328 | 0.2815 | 0.1852 | 1 |
| BP | GO:0043244 | regulation of protein-containing complex disassembly                    | 1/60 | 128/23328 | 0.2815 | 0.1852 | 1 |
| BP | GO:0051592 | response to calcium ion                                                 | 1/60 | 128/23328 | 0.2815 | 0.1852 | 1 |
| BP | GO:0061013 | regulation of mRNA catabolic process                                    | 1/60 | 128/23328 | 0.2815 | 0.1852 | 1 |
| BP | GO:0061387 | regulation of extent of cell growth                                     | 1/60 | 128/23328 | 0.2815 | 0.1852 | 1 |
| BP | GO:0032273 | positive regulation of protein polymerization                           | 1/60 | 129/23328 | 0.2833 | 0.1860 | 1 |
| BP | GO:0046434 | organophosphate catabolic process                                       | 1/60 | 129/23328 | 0.2833 | 0.1860 | 1 |
| BP | GO:0061844 | antimicrobial humoral immune response mediated by antimicrobial peptide | 1/60 | 129/23328 | 0.2833 | 0.1860 | 1 |
| BP | GO:0042177 | negative regulation of protein catabolic process                        | 1/60 | 130/23328 | 0.2852 | 0.1871 | 1 |
| BP | GO:0050852 | T cell receptor signaling pathway                                       | 1/60 | 130/23328 | 0.2852 | 0.1871 | 1 |

|    |            |                                                          |      |           |        |        |   |
|----|------------|----------------------------------------------------------|------|-----------|--------|--------|---|
| BP | GO:0006665 | sphingolipid metabolic process                           | 1/60 | 131/23328 | 0.2870 | 0.1880 | 1 |
| BP | GO:0007368 | determination of left/right<br>symmetry                  | 1/60 | 131/23328 | 0.2870 | 0.1880 | 1 |
| BP | GO:0018022 | peptidyl-lysine methylation                              | 1/60 | 131/23328 | 0.2870 | 0.1880 | 1 |
| BP | GO:0010469 | regulation of signaling receptor<br>activity             | 1/60 | 132/23328 | 0.2889 | 0.1889 | 1 |
| BP | GO:0031023 | microtubule organizing center<br>organization            | 1/60 | 132/23328 | 0.2889 | 0.1889 | 1 |
| BP | GO:0099175 | regulation of postsynapse<br>organization                | 1/60 | 132/23328 | 0.2889 | 0.1889 | 1 |
| BP | GO:0001841 | neural tube formation                                    | 1/60 | 133/23328 | 0.2907 | 0.1899 | 1 |
| BP | GO:0001936 | regulation of endothelial cell<br>proliferation          | 1/60 | 134/23328 | 0.2925 | 0.1908 | 1 |
| BP | GO:0009791 | post-embryonic development                               | 1/60 | 134/23328 | 0.2925 | 0.1908 | 1 |
| BP | GO:1903038 | negative regulation of leukocyte<br>cell-cell adhesion   | 1/60 | 134/23328 | 0.2925 | 0.1908 | 1 |
| BP | GO:0030177 | positive regulation of Wnt<br>signaling pathway          | 1/60 | 135/23328 | 0.2944 | 0.1916 | 1 |
| BP | GO:0070646 | protein modification by small<br>protein removal         | 1/60 | 135/23328 | 0.2944 | 0.1916 | 1 |
| BP | GO:1901655 | cellular response to ketone                              | 1/60 | 135/23328 | 0.2944 | 0.1916 | 1 |
| BP | GO:0055123 | digestive system development                             | 1/60 | 136/23328 | 0.2962 | 0.1927 | 1 |
| BP | GO:0007050 | cell cycle arrest                                        | 1/60 | 137/23328 | 0.2980 | 0.1937 | 1 |
| BP | GO:0034341 | response to interferon-gamma                             | 1/60 | 137/23328 | 0.2980 | 0.1937 | 1 |
| BP | GO:0006639 | acylglycerol metabolic process                           | 1/60 | 138/23328 | 0.2998 | 0.1944 | 1 |
| BP | GO:0042471 | ear morphogenesis                                        | 1/60 | 138/23328 | 0.2998 | 0.1944 | 1 |
| BP | GO:0048284 | organelle fusion                                         | 1/60 | 138/23328 | 0.2998 | 0.1944 | 1 |
| BP | GO:0048675 | axon extension                                           | 1/60 | 138/23328 | 0.2998 | 0.1944 | 1 |
| BP | GO:0050671 | positive regulation of<br>lymphocyte proliferation       | 1/60 | 138/23328 | 0.2998 | 0.1944 | 1 |
| BP | GO:0055007 | cardiac muscle cell<br>differentiation                   | 1/60 | 139/23328 | 0.3017 | 0.1955 | 1 |
| BP | GO:0006638 | neutral lipid metabolic process                          | 1/60 | 140/23328 | 0.3035 | 0.1963 | 1 |
| BP | GO:0009855 | determination of bilateral<br>symmetry                   | 1/60 | 140/23328 | 0.3035 | 0.1963 | 1 |
| BP | GO:0032946 | positive regulation of<br>mononuclear cell proliferation | 1/60 | 140/23328 | 0.3035 | 0.1963 | 1 |
| BP | GO:1904375 | regulation of protein<br>localization to cell periphery  | 1/60 | 140/23328 | 0.3035 | 0.1963 | 1 |
| BP | GO:0009152 | purine ribonucleotide<br>biosynthetic process            | 1/60 | 141/23328 | 0.3053 | 0.1972 | 1 |
| BP | GO:0009799 | specification of symmetry                                | 1/60 | 141/23328 | 0.3053 | 0.1972 | 1 |

|    |            |                                                                                                                                                  |      |           |        |        |   |
|----|------------|--------------------------------------------------------------------------------------------------------------------------------------------------|------|-----------|--------|--------|---|
| BP | GO:0048706 | embryonic skeletal system development                                                                                                            | 1/60 | 142/23328 | 0.3071 | 0.1980 | 1 |
| BP | GO:1902850 | microtubule cytoskeleton organization involved in mitosis                                                                                        | 1/60 | 142/23328 | 0.3071 | 0.1980 | 1 |
| BP | GO:0002708 | positive regulation of lymphocyte mediated immunity                                                                                              | 1/60 | 144/23328 | 0.3106 | 0.1998 | 1 |
| BP | GO:0015698 | inorganic anion transport                                                                                                                        | 1/60 | 144/23328 | 0.3106 | 0.1998 | 1 |
| BP | GO:0016571 | histone methylation                                                                                                                              | 1/60 | 144/23328 | 0.3106 | 0.1998 | 1 |
| BP | GO:0043624 | cellular protein complex disassembly                                                                                                             | 1/60 | 144/23328 | 0.3106 | 0.1998 | 1 |
| BP | GO:0071333 | cellular response to glucose stimulus                                                                                                            | 1/60 | 144/23328 | 0.3106 | 0.1998 | 1 |
| BP | GO:0072089 | stem cell proliferation                                                                                                                          | 1/60 | 144/23328 | 0.3106 | 0.1998 | 1 |
| BP | GO:0072073 | kidney epithelium development                                                                                                                    | 1/60 | 145/23328 | 0.3124 | 0.2008 | 1 |
| BP | GO:0035637 | multicellular organismal signaling                                                                                                               | 1/60 | 146/23328 | 0.3142 | 0.2018 | 1 |
| BP | GO:0071331 | cellular response to hexose stimulus                                                                                                             | 1/60 | 146/23328 | 0.3142 | 0.2018 | 1 |
| BP | GO:0002824 | positive regulation of adaptive immune response based on somatic recombination of immune receptors built from immunoglobulin superfamily domains | 1/60 | 147/23328 | 0.3160 | 0.2024 | 1 |
| BP | GO:0003206 | cardiac chamber morphogenesis                                                                                                                    | 1/60 | 147/23328 | 0.3160 | 0.2024 | 1 |
| BP | GO:0003231 | cardiac ventricle development                                                                                                                    | 1/60 | 147/23328 | 0.3160 | 0.2024 | 1 |
| BP | GO:0045667 | regulation of osteoblast differentiation                                                                                                         | 1/60 | 147/23328 | 0.3160 | 0.2024 | 1 |
| BP | GO:0051092 | positive regulation of NF-kappaB transcription factor activity                                                                                   | 1/60 | 147/23328 | 0.3160 | 0.2024 | 1 |
| BP | GO:0071326 | cellular response to monosaccharide stimulus                                                                                                     | 1/60 | 147/23328 | 0.3160 | 0.2024 | 1 |
| BP | GO:0001935 | endothelial cell proliferation                                                                                                                   | 1/60 | 149/23328 | 0.3195 | 0.2045 | 1 |
| BP | GO:0009260 | ribonucleotide biosynthetic process                                                                                                              | 1/60 | 150/23328 | 0.3213 | 0.2052 | 1 |
| BP | GO:0061025 | membrane fusion                                                                                                                                  | 1/60 | 150/23328 | 0.3213 | 0.2052 | 1 |
| BP | GO:0000070 | mitotic sister chromatid segregation                                                                                                             | 1/60 | 151/23328 | 0.3230 | 0.2062 | 1 |
| BP | GO:0072006 | nephron development                                                                                                                              | 1/60 | 151/23328 | 0.3230 | 0.2062 | 1 |
| BP | GO:0070665 | positive regulation of leukocyte proliferation                                                                                                   | 1/60 | 152/23328 | 0.3248 | 0.2071 | 1 |

|    |            |                                                       |      |           |        |          |
|----|------------|-------------------------------------------------------|------|-----------|--------|----------|
|    |            | negative regulation of cellular                       |      |           |        |          |
| BP | GO:0090288 | response to growth factor stimulus                    | 1/60 | 152/23328 | 0.3248 | 0.2071 1 |
| BP | GO:0055088 | lipid homeostasis                                     | 1/60 | 153/23328 | 0.3265 | 0.2081 1 |
| BP | GO:0008360 | regulation of cell shape                              | 1/60 | 154/23328 | 0.3283 | 0.2091 1 |
| BP | GO:0001838 | embryonic epithelial tube formation                   | 1/60 | 155/23328 | 0.3300 | 0.2099 1 |
| BP | GO:0007292 | female gamete generation                              | 1/60 | 155/23328 | 0.3300 | 0.2099 1 |
| BP | GO:0071322 | cellular response to carbohydrate stimulus            | 1/60 | 155/23328 | 0.3300 | 0.2099 1 |
| BP | GO:0002687 | positive regulation of leukocyte migration            | 1/60 | 156/23328 | 0.3318 | 0.2109 1 |
| BP | GO:0006937 | regulation of muscle contraction                      | 1/60 | 156/23328 | 0.3318 | 0.2109 1 |
| BP | GO:0021543 | pallium development                                   | 1/60 | 157/23328 | 0.3335 | 0.2116 1 |
| BP | GO:0046390 | ribose phosphate biosynthetic process                 | 1/60 | 157/23328 | 0.3335 | 0.2116 1 |
| BP | GO:0050657 | nucleic acid transport                                | 1/60 | 157/23328 | 0.3335 | 0.2116 1 |
| BP | GO:0050658 | RNA transport                                         | 1/60 | 157/23328 | 0.3335 | 0.2116 1 |
| BP | GO:1903900 | regulation of viral life cycle                        | 1/60 | 159/23328 | 0.3369 | 0.2136 1 |
| BP | GO:0000910 | cytokinesis                                           | 1/60 | 160/23328 | 0.3386 | 0.2143 1 |
| BP | GO:0006164 | purine nucleotide biosynthetic process                | 1/60 | 160/23328 | 0.3386 | 0.2143 1 |
| BP | GO:0007088 | regulation of mitotic nuclear division                | 1/60 | 160/23328 | 0.3386 | 0.2143 1 |
| BP | GO:0051236 | establishment of RNA localization                     | 1/60 | 160/23328 | 0.3386 | 0.2143 1 |
| BP | GO:0072175 | epithelial tube formation                             | 1/60 | 162/23328 | 0.3421 | 0.2162 1 |
| BP | GO:0001678 | cellular glucose homeostasis                          | 1/60 | 163/23328 | 0.3438 | 0.2171 1 |
| BP | GO:0031056 | regulation of histone modification                    | 1/60 | 163/23328 | 0.3438 | 0.2171 1 |
| BP | GO:0019730 | antimicrobial humoral response                        | 1/60 | 165/23328 | 0.3472 | 0.2191 1 |
| BP | GO:0072522 | purine-containing compound biosynthetic process       | 1/60 | 165/23328 | 0.3472 | 0.2191 1 |
| BP | GO:0030509 | BMP signaling pathway                                 | 1/60 | 167/23328 | 0.3505 | 0.2209 1 |
| BP | GO:0051100 | negative regulation of binding                        | 1/60 | 167/23328 | 0.3505 | 0.2209 1 |
| BP | GO:0071897 | DNA biosynthetic process                              | 1/60 | 169/23328 | 0.3539 | 0.2229 1 |
| BP | GO:1904064 | positive regulation of cation transmembrane transport | 1/60 | 170/23328 | 0.3556 | 0.2239 1 |
| BP | GO:0030902 | hindbrain development                                 | 1/60 | 171/23328 | 0.3572 | 0.2247 1 |
| BP | GO:0051494 | negative regulation of cytoskeleton organization      | 1/60 | 171/23328 | 0.3572 | 0.2247 1 |

|    |            |                                                      |      |           |        |        |   |
|----|------------|------------------------------------------------------|------|-----------|--------|--------|---|
| BP | GO:0060041 | retina development in camera-type eye                | 1/60 | 172/23328 | 0.3589 | 0.2257 | 1 |
| BP | GO:0071230 | cellular response to amino acid stimulus             | 1/60 | 173/23328 | 0.3606 | 0.2266 | 1 |
| BP | GO:0006643 | membrane lipid metabolic process                     | 1/60 | 174/23328 | 0.3622 | 0.2274 | 1 |
| BP | GO:1901654 | response to ketone                                   | 1/60 | 174/23328 | 0.3622 | 0.2274 | 1 |
| BP | GO:0009612 | response to mechanical stimulus                      | 1/60 | 176/23328 | 0.3655 | 0.2292 | 1 |
| BP | GO:0010977 | negative regulation of neuron projection development | 1/60 | 176/23328 | 0.3655 | 0.2292 | 1 |
| BP | GO:2001257 | regulation of cation channel activity                | 1/60 | 176/23328 | 0.3655 | 0.2292 | 1 |
| BP | GO:0016202 | regulation of striated muscle tissue development     | 1/60 | 177/23328 | 0.3672 | 0.2299 | 1 |
| BP | GO:0035051 | cardiocyte differentiation                           | 1/60 | 177/23328 | 0.3672 | 0.2299 | 1 |
| BP | GO:0035148 | tube formation                                       | 1/60 | 177/23328 | 0.3672 | 0.2299 | 1 |
| BP | GO:0050821 | protein stabilization                                | 1/60 | 178/23328 | 0.3688 | 0.2307 | 1 |
| BP | GO:0071772 | response to BMP                                      | 1/60 | 178/23328 | 0.3688 | 0.2307 | 1 |
| BP | GO:0071773 | cellular response to BMP stimulus                    | 1/60 | 178/23328 | 0.3688 | 0.2307 | 1 |
| BP | GO:0007051 | spindle organization                                 | 1/60 | 179/23328 | 0.3705 | 0.2316 | 1 |
| BP | GO:0000075 | cell cycle checkpoint                                | 1/60 | 180/23328 | 0.3721 | 0.2323 | 1 |
| BP | GO:1901861 | regulation of muscle tissue development              | 1/60 | 180/23328 | 0.3721 | 0.2323 | 1 |
| BP | GO:1902107 | positive regulation of leukocyte differentiation     | 1/60 | 180/23328 | 0.3721 | 0.2323 | 1 |
| BP | GO:0000819 | sister chromatid segregation                         | 1/60 | 181/23328 | 0.3737 | 0.2330 | 1 |
| BP | GO:0001659 | temperature homeostasis                              | 1/60 | 181/23328 | 0.3737 | 0.2330 | 1 |
| BP | GO:0045088 | regulation of innate immune response                 | 1/60 | 181/23328 | 0.3737 | 0.2330 | 1 |
| BP | GO:0006403 | RNA localization                                     | 1/60 | 182/23328 | 0.3753 | 0.2338 | 1 |
| BP | GO:0048813 | dendrite morphogenesis                               | 1/60 | 182/23328 | 0.3753 | 0.2338 | 1 |
| BP | GO:0006479 | protein methylation                                  | 1/60 | 183/23328 | 0.3770 | 0.2344 | 1 |
| BP | GO:0008016 | regulation of heart contraction                      | 1/60 | 183/23328 | 0.3770 | 0.2344 | 1 |
| BP | GO:0008213 | protein alkylation                                   | 1/60 | 183/23328 | 0.3770 | 0.2344 | 1 |
| BP | GO:0016331 | morphogenesis of embryonic epithelium                | 1/60 | 183/23328 | 0.3770 | 0.2344 | 1 |
| BP | GO:0030534 | adult behavior                                       | 1/60 | 184/23328 | 0.3786 | 0.2352 | 1 |
| BP | GO:2001235 | positive regulation of apoptotic signaling pathway   | 1/60 | 184/23328 | 0.3786 | 0.2352 | 1 |

|    |            |                                                                |      |           |        |        |   |
|----|------------|----------------------------------------------------------------|------|-----------|--------|--------|---|
| BP | GO:0002705 | positive regulation of leukocyte mediated immunity             | 1/60 | 185/23328 | 0.3802 | 0.2359 | 1 |
| BP | GO:0048754 | branching morphogenesis of an epithelial tube                  | 1/60 | 185/23328 | 0.3802 | 0.2359 | 1 |
| BP | GO:0071229 | cellular response to acid chemical                             | 1/60 | 185/23328 | 0.3802 | 0.2359 | 1 |
| BP | GO:0034767 | positive regulation of ion transmembrane transport             | 1/60 | 187/23328 | 0.3834 | 0.2378 | 1 |
| BP | GO:0001764 | neuron migration                                               | 1/60 | 189/23328 | 0.3866 | 0.2396 | 1 |
| BP | GO:0055002 | striated muscle cell development                               | 1/60 | 190/23328 | 0.3882 | 0.2404 | 1 |
| BP | GO:0120032 | regulation of plasma membrane bounded cell projection assembly | 1/60 | 190/23328 | 0.3882 | 0.2404 | 1 |
| BP | GO:0051783 | regulation of nuclear division                                 | 1/60 | 191/23328 | 0.3898 | 0.2412 | 1 |
| BP | GO:0061351 | neural precursor cell proliferation                            | 1/60 | 191/23328 | 0.3898 | 0.2412 | 1 |
| BP | GO:0060491 | regulation of cell projection assembly                         | 1/60 | 192/23328 | 0.3913 | 0.2419 | 1 |
| BP | GO:2001252 | positive regulation of chromosome organization                 | 1/60 | 192/23328 | 0.3913 | 0.2419 | 1 |
| BP | GO:0006486 | protein glycosylation                                          | 1/60 | 193/23328 | 0.3929 | 0.2425 | 1 |
| BP | GO:0015931 | nucleobase-containing compound transport                       | 1/60 | 193/23328 | 0.3929 | 0.2425 | 1 |
| BP | GO:0043413 | macromolecule glycosylation                                    | 1/60 | 193/23328 | 0.3929 | 0.2425 | 1 |
| BP | GO:1903305 | regulation of regulated secretory pathway                      | 1/60 | 193/23328 | 0.3929 | 0.2425 | 1 |
| BP | GO:0003205 | cardiac chamber development                                    | 1/60 | 194/23328 | 0.3945 | 0.2433 | 1 |
| BP | GO:0021915 | neural tube development                                        | 1/60 | 194/23328 | 0.3945 | 0.2433 | 1 |
| BP | GO:0007519 | skeletal muscle tissue development                             | 1/60 | 196/23328 | 0.3976 | 0.2451 | 1 |
| BP | GO:0050773 | regulation of dendrite development                             | 1/60 | 197/23328 | 0.3992 | 0.2459 | 1 |
| BP | GO:0030307 | positive regulation of cell growth                             | 1/60 | 198/23328 | 0.4008 | 0.2468 | 1 |
| BP | GO:0001906 | cell killing                                                   | 1/60 | 200/23328 | 0.4039 | 0.2482 | 1 |
| BP | GO:0006839 | mitochondrial transport                                        | 1/60 | 200/23328 | 0.4039 | 0.2482 | 1 |
| BP | GO:0051099 | positive regulation of binding                                 | 1/60 | 200/23328 | 0.4039 | 0.2482 | 1 |
| BP | GO:0099173 | postsynapse organization                                       | 1/60 | 200/23328 | 0.4039 | 0.2482 | 1 |
| BP | GO:1902905 | positive regulation of supramolecular fiber organization       | 1/60 | 200/23328 | 0.4039 | 0.2482 | 1 |

|    |            |                                                               |      |           |        |        |   |
|----|------------|---------------------------------------------------------------|------|-----------|--------|--------|---|
| BP | GO:0009566 | fertilization                                                 | 1/60 | 201/23328 | 0.4054 | 0.2489 | 1 |
| BP | GO:0070507 | regulation of microtubule<br>cytoskeleton organization        | 1/60 | 201/23328 | 0.4054 | 0.2489 | 1 |
| BP | GO:0048736 | appendage development                                         | 1/60 | 202/23328 | 0.4069 | 0.2496 | 1 |
| BP | GO:0060173 | limb development                                              | 1/60 | 202/23328 | 0.4069 | 0.2496 | 1 |
| BP | GO:0001649 | osteoblast differentiation                                    | 1/60 | 205/23328 | 0.4116 | 0.2520 | 1 |
| BP | GO:0045216 | cell-cell junction organization                               | 1/60 | 205/23328 | 0.4116 | 0.2520 | 1 |
| BP | GO:0048469 | cell maturation                                               | 1/60 | 205/23328 | 0.4116 | 0.2520 | 1 |
| BP | GO:0055001 | muscle cell development                                       | 1/60 | 205/23328 | 0.4116 | 0.2520 | 1 |
| BP | GO:0060538 | skeletal muscle organ<br>development                          | 1/60 | 206/23328 | 0.4131 | 0.2527 | 1 |
| BP | GO:1902115 | regulation of organelle<br>assembly                           | 1/60 | 206/23328 | 0.4131 | 0.2527 | 1 |
| BP | GO:0031345 | negative regulation of cell<br>projection organization        | 1/60 | 207/23328 | 0.4146 | 0.2534 | 1 |
| BP | GO:0035265 | organ growth                                                  | 1/60 | 207/23328 | 0.4146 | 0.2534 | 1 |
| BP | GO:0050770 | regulation of axonogenesis                                    | 1/60 | 208/23328 | 0.4161 | 0.2541 | 1 |
| BP | GO:0070085 | glycosylation                                                 | 1/60 | 208/23328 | 0.4161 | 0.2541 | 1 |
| BP | GO:0098742 | cell-cell adhesion via plasma-<br>membrane adhesion molecules | 1/60 | 209/23328 | 0.4176 | 0.2549 | 1 |
| BP | GO:1902275 | regulation of chromatin<br>organization                       | 1/60 | 210/23328 | 0.4191 | 0.2556 | 1 |
| BP | GO:2000027 | regulation of animal organ<br>morphogenesis                   | 1/60 | 210/23328 | 0.4191 | 0.2556 | 1 |
| BP | GO:0097305 | response to alcohol                                           | 1/60 | 212/23328 | 0.4222 | 0.2574 | 1 |
| BP | GO:0051651 | maintenance of location in cell                               | 1/60 | 213/23328 | 0.4237 | 0.2582 | 1 |
| BP | GO:0010810 | regulation of cell-substrate<br>adhesion                      | 1/60 | 214/23328 | 0.4252 | 0.2590 | 1 |
| BP | GO:0006402 | mRNA catabolic process                                        | 1/60 | 217/23328 | 0.4296 | 0.2615 | 1 |
| BP | GO:0051054 | positive regulation of DNA<br>metabolic process               | 1/60 | 217/23328 | 0.4296 | 0.2615 | 1 |
| BP | GO:0050871 | positive regulation of B cell<br>activation                   | 1/60 | 220/23328 | 0.4341 | 0.2641 | 1 |
| BP | GO:0060047 | heart contraction                                             | 1/60 | 221/23328 | 0.4355 | 0.2648 | 1 |
| BP | GO:0030324 | lung development                                              | 1/60 | 222/23328 | 0.4370 | 0.2653 | 1 |
| BP | GO:0043547 | positive regulation of GTPase<br>activity                     | 1/60 | 222/23328 | 0.4370 | 0.2653 | 1 |
| BP | GO:0060348 | bone development                                              | 1/60 | 222/23328 | 0.4370 | 0.2653 | 1 |
| BP | GO:2001020 | regulation of response to DNA<br>damage stimulus              | 1/60 | 222/23328 | 0.4370 | 0.2653 | 1 |

|    |            |                                                                 |      |           |        |        |   |
|----|------------|-----------------------------------------------------------------|------|-----------|--------|--------|---|
| BP | GO:0051259 | protein complex oligomerization                                 | 1/60 | 223/23328 | 0.4384 | 0.2660 | 1 |
| BP | GO:0030323 | respiratory tube development                                    | 1/60 | 225/23328 | 0.4414 | 0.2676 | 1 |
| BP | GO:0051495 | positive regulation of cytoskeleton organization                | 1/60 | 225/23328 | 0.4414 | 0.2676 | 1 |
| BP | GO:0043406 | positive regulation of MAP kinase activity                      | 1/60 | 226/23328 | 0.4428 | 0.2683 | 1 |
| BP | GO:0016197 | endosomal transport                                             | 1/60 | 228/23328 | 0.4457 | 0.2700 | 1 |
| BP | GO:0016485 | protein processing                                              | 1/60 | 229/23328 | 0.4471 | 0.2707 | 1 |
| BP | GO:0003015 | heart process                                                   | 1/60 | 231/23328 | 0.4500 | 0.2722 | 1 |
| BP | GO:0043393 | regulation of protein binding                                   | 1/60 | 231/23328 | 0.4500 | 0.2722 | 1 |
| BP | GO:0032872 | regulation of stress-activated MAPK cascade                     | 1/60 | 232/23328 | 0.4514 | 0.2730 | 1 |
| BP | GO:0090150 | establishment of protein localization to membrane               | 1/60 | 233/23328 | 0.4529 | 0.2737 | 1 |
| BP | GO:0006470 | protein dephosphorylation                                       | 1/60 | 235/23328 | 0.4557 | 0.2751 | 1 |
| BP | GO:0031334 | positive regulation of protein-containing complex assembly      | 1/60 | 235/23328 | 0.4557 | 0.2751 | 1 |
| BP | GO:0070302 | regulation of stress-activated protein kinase signaling cascade | 1/60 | 235/23328 | 0.4557 | 0.2751 | 1 |
| BP | GO:0045930 | negative regulation of mitotic cell cycle                       | 1/60 | 236/23328 | 0.4571 | 0.2758 | 1 |
| BP | GO:0000209 | protein polyubiquitination                                      | 1/60 | 237/23328 | 0.4585 | 0.2764 | 1 |
| BP | GO:0048863 | stem cell differentiation                                       | 1/60 | 237/23328 | 0.4585 | 0.2764 | 1 |
| BP | GO:0006898 | receptor-mediated endocytosis                                   | 1/60 | 240/23328 | 0.4627 | 0.2788 | 1 |
| BP | GO:0034764 | positive regulation of transmembrane transport                  | 1/60 | 243/23328 | 0.4669 | 0.2812 | 1 |
| BP | GO:0007568 | aging                                                           | 1/60 | 251/23328 | 0.4779 | 0.2877 | 1 |
| BP | GO:0048705 | skeletal system morphogenesis                                   | 1/60 | 253/23328 | 0.4806 | 0.2892 | 1 |
| BP | GO:0006401 | RNA catabolic process                                           | 1/60 | 254/23328 | 0.4820 | 0.2897 | 1 |
| BP | GO:0017157 | regulation of exocytosis                                        | 1/60 | 254/23328 | 0.4820 | 0.2897 | 1 |
| BP | GO:0060541 | respiratory system development                                  | 1/60 | 254/23328 | 0.4820 | 0.2897 | 1 |
| BP | GO:0007626 | locomotory behavior                                             | 1/60 | 258/23328 | 0.4873 | 0.2925 | 1 |
| BP | GO:0032886 | regulation of microtubule-based process                         | 1/60 | 258/23328 | 0.4873 | 0.2925 | 1 |
| BP | GO:0048738 | cardiac muscle tissue development                               | 1/60 | 258/23328 | 0.4873 | 0.2925 | 1 |
| BP | GO:0032412 | regulation of ion transmembrane transporter activity            | 1/60 | 259/23328 | 0.4887 | 0.2932 | 1 |
| BP | GO:0045055 | regulated exocytosis                                            | 1/60 | 261/23328 | 0.4913 | 0.2947 | 1 |



|    |            |                                                                    |      |           |        |        |   |
|----|------------|--------------------------------------------------------------------|------|-----------|--------|--------|---|
| BP | GO:0098813 | nuclear chromosome segregation                                     | 1/60 | 262/23328 | 0.4926 | 0.2953 | 1 |
| BP | GO:1903311 | regulation of mRNA metabolic process                               | 1/60 | 266/23328 | 0.4979 | 0.2984 | 1 |
| BP | GO:0140014 | mitotic nuclear division                                           | 1/60 | 268/23328 | 0.5005 | 0.2998 | 1 |
| BP | GO:0022898 | regulation of transmembrane transporter activity                   | 1/60 | 270/23328 | 0.5031 | 0.3012 | 1 |
| BP | GO:0009101 | glycoprotein biosynthetic process                                  | 1/60 | 273/23328 | 0.5070 | 0.3034 | 1 |
| BP | GO:0003007 | heart morphogenesis                                                | 1/60 | 277/23328 | 0.5121 | 0.3062 | 1 |
| BP | GO:0050807 | regulation of synapse organization                                 | 1/60 | 277/23328 | 0.5121 | 0.3062 | 1 |
| BP | GO:0032409 | regulation of transporter activity                                 | 1/60 | 280/23328 | 0.5159 | 0.3084 | 1 |
| BP | GO:0070588 | calcium ion transmembrane transport                                | 1/60 | 282/23328 | 0.5184 | 0.3097 | 1 |
| BP | GO:0031647 | regulation of protein stability                                    | 1/60 | 287/23328 | 0.5246 | 0.3133 | 1 |
| BP | GO:0050803 | regulation of synapse structure or activity                        | 1/60 | 289/23328 | 0.5271 | 0.3147 | 1 |
| BP | GO:0071902 | positive regulation of protein serine/threonine kinase activity    | 1/60 | 291/23328 | 0.5296 | 0.3160 | 1 |
| BP | GO:0045165 | cell fate commitment                                               | 1/60 | 292/23328 | 0.5308 | 0.3166 | 1 |
| BP | GO:0051604 | protein maturation                                                 | 1/60 | 294/23328 | 0.5332 | 0.3179 | 1 |
| BP | GO:0043414 | macromolecule methylation                                          | 1/60 | 297/23328 | 0.5369 | 0.3200 | 1 |
| BP | GO:0006936 | muscle contraction                                                 | 1/60 | 298/23328 | 0.5381 | 0.3205 | 1 |
| BP | GO:0050851 | antigen receptor-mediated signaling pathway                        | 1/60 | 299/23328 | 0.5393 | 0.3211 | 1 |
| BP | GO:0043087 | regulation of GTPase activity                                      | 1/60 | 303/23328 | 0.5441 | 0.3238 | 1 |
| BP | GO:0030111 | regulation of Wnt signaling pathway                                | 1/60 | 304/23328 | 0.5453 | 0.3244 | 1 |
| BP | GO:1990830 | cellular response to leukemia inhibitory factor                    | 1/60 | 311/23328 | 0.5535 | 0.3292 | 1 |
| BP | GO:0045927 | positive regulation of growth                                      | 1/60 | 312/23328 | 0.5547 | 0.3296 | 1 |
| BP | GO:1990823 | response to leukemia inhibitory factor                             | 1/60 | 312/23328 | 0.5547 | 0.3296 | 1 |
| BP | GO:0007548 | sex differentiation                                                | 1/60 | 315/23328 | 0.5581 | 0.3315 | 1 |
| BP | GO:0001822 | kidney development                                                 | 1/60 | 318/23328 | 0.5616 | 0.3334 | 1 |
| BP | GO:0007059 | chromosome segregation                                             | 1/60 | 324/23328 | 0.5684 | 0.3373 | 1 |
| BP | GO:0002429 | immune response-activating cell surface receptor signaling pathway | 1/60 | 330/23328 | 0.5751 | 0.3410 | 1 |
| BP | GO:0007204 | positive regulation of cytosolic calcium ion concentration         | 1/60 | 330/23328 | 0.5751 | 0.3410 | 1 |

|    |            |                                                                          |      |           |        |        |   |
|----|------------|--------------------------------------------------------------------------|------|-----------|--------|--------|---|
| BP | GO:0002757 | immune response-activating<br>signal transduction                        | 1/60 | 331/23328 | 0.5762 | 0.3415 | 1 |
| BP | GO:0072001 | renal system development                                                 | 1/60 | 333/23328 | 0.5784 | 0.3427 | 1 |
| BP | GO:0043270 | positive regulation of ion<br>transport                                  | 1/60 | 334/23328 | 0.5795 | 0.3432 | 1 |
| BP | GO:0002768 | immune response-regulating<br>cell surface receptor signaling<br>pathway | 1/60 | 342/23328 | 0.5882 | 0.3482 | 1 |
| BP | GO:0002764 | immune response-regulating<br>signaling pathway<br>regulation of cell    | 1/60 | 345/23328 | 0.5914 | 0.3499 | 1 |
| BP | GO:0010769 | morphogenesis involved in<br>differentiation                             | 1/60 | 351/23328 | 0.5978 | 0.3534 | 1 |
| BP | GO:0031589 | cell-substrate adhesion                                                  | 1/60 | 351/23328 | 0.5978 | 0.3534 | 1 |
| BP | GO:0034470 | ncRNA processing                                                         | 1/60 | 355/23328 | 0.6020 | 0.3557 | 1 |
| BP | GO:0033044 | regulation of chromosome<br>organization                                 | 1/60 | 369/23328 | 0.6163 | 0.3640 | 1 |
| BP | GO:0016311 | dephosphorylation                                                        | 1/60 | 374/23328 | 0.6213 | 0.3668 | 1 |
| BP | GO:0051480 | regulation of cytosolic calcium<br>ion concentration                     | 1/60 | 375/23328 | 0.6223 | 0.3673 | 1 |
| BP | GO:0001655 | urogenital system development                                            | 1/60 | 376/23328 | 0.6233 | 0.3677 | 1 |
| BP | GO:0006887 | exocytosis                                                               | 1/60 | 389/23328 | 0.6359 | 0.3750 | 1 |
| BP | GO:0006959 | humoral immune response                                                  | 1/60 | 406/23328 | 0.6517 | 0.3842 | 1 |
| BP | GO:0002253 | activation of immune response                                            | 1/60 | 416/23328 | 0.6607 | 0.3893 | 1 |
| BP | GO:0000280 | nuclear division                                                         | 1/60 | 418/23328 | 0.6625 | 0.3902 | 1 |
| BP | GO:0007264 | small GTPase mediated signal<br>transduction                             | 1/60 | 437/23328 | 0.6789 | 0.3997 | 1 |
| BP | GO:0042742 | defense response to bacterium                                            | 1/60 | 464/23328 | 0.7009 | 0.4125 | 1 |
| BP | GO:0048285 | organelle fission                                                        | 1/60 | 472/23328 | 0.7071 | 0.4159 | 1 |
| BP | GO:0006874 | cellular calcium ion<br>homeostasis                                      | 1/60 | 476/23328 | 0.7102 | 0.4176 | 1 |
| BP | GO:0050808 | synapse organization                                                     | 1/60 | 479/23328 | 0.7125 | 0.4187 | 1 |
| BP | GO:0007409 | axonogenesis                                                             | 1/60 | 482/23328 | 0.7147 | 0.4199 | 1 |
| BP | GO:0055074 | calcium ion homeostasis                                                  | 1/60 | 493/23328 | 0.7229 | 0.4245 | 1 |
| CC | GO:0005845 | mRNA cap binding complex                                                 | 1/61 | 10/23271  | 0.0259 | 0.0959 | 1 |
| CC | GO:0034518 | RNA cap binding complex                                                  | 1/61 | 10/23271  | 0.0259 | 0.0959 | 1 |
| CC | GO:0046581 | intercellular canaliculus                                                | 1/61 | 10/23271  | 0.0259 | 0.0959 | 1 |
| CC | GO:0070578 | RISC-loading complex                                                     | 1/61 | 11/23271  | 0.0285 | 0.0961 | 1 |
| CC | GO:0034045 | phagophore assembly site<br>membrane                                     | 1/61 | 12/23271  | 0.0310 | 0.0961 | 1 |

|    |            |                                                  |      |          |              |   |
|----|------------|--------------------------------------------------|------|----------|--------------|---|
| CC | GO:0034663 | endoplasmic reticulum<br>chaperone complex       | 1/61 | 12/23271 | 0.03100.0961 | 1 |
| CC | GO:0043020 | NADPH oxidase complex                            | 1/61 | 12/23271 | 0.03100.0961 | 1 |
| CC | GO:0048188 | Set1C/COMPASS complex                            | 1/61 | 12/23271 | 0.03100.0961 | 1 |
| CC | GO:0071437 | invadopodium                                     | 1/61 | 14/23271 | 0.03610.1062 | 1 |
| CC | GO:0030014 | CCR4-NOT complex<br>mitochondria-associated      | 1/61 | 16/23271 | 0.04110.1158 | 1 |
| CC | GO:0044233 | endoplasmic reticulum<br>membrane                | 1/61 | 16/23271 | 0.04110.1158 | 1 |
| CC | GO:0034361 | very-low-density lipoprotein<br>particle         | 1/61 | 19/23271 | 0.04870.1286 | 1 |
| CC | GO:0034385 | triglyceride-rich plasma<br>lipoprotein particle | 1/61 | 19/23271 | 0.04870.1286 | 1 |
| CC | GO:0090543 | Flemming body                                    | 1/61 | 19/23271 | 0.04870.1286 | 1 |
| CC | GO:0097449 | astrocyte projection                             | 1/61 | 20/23271 | 0.05120.1286 | 1 |
| CC | GO:0005640 | nuclear outer membrane                           | 1/61 | 21/23271 | 0.05370.1286 | 1 |
| CC | GO:0031528 | microvillus membrane                             | 1/61 | 21/23271 | 0.05370.1286 | 1 |
| CC | GO:0045120 | pronucleus                                       | 1/61 | 23/23271 | 0.05860.1296 | 1 |
| CC | GO:0000178 | exosome (RNase complex)                          | 1/61 | 24/23271 | 0.06110.1296 | 1 |
| CC | GO:0005782 | peroxisomal matrix                               | 1/61 | 24/23271 | 0.06110.1296 | 1 |
| CC | GO:0030057 | desmosome                                        | 1/61 | 24/23271 | 0.06110.1296 | 1 |
| CC | GO:0031907 | microbody lumen                                  | 1/61 | 24/23271 | 0.06110.1296 | 1 |
| CC | GO:1905354 | exoribonuclease complex                          | 1/61 | 24/23271 | 0.06110.1296 | 1 |
| CC | GO:0002080 | acrosomal membrane                               | 1/61 | 25/23271 | 0.06350.1327 | 1 |
| CC | GO:0044232 | organelle membrane contact site                  | 1/61 | 28/23271 | 0.07090.1457 | 1 |
| CC | GO:1902555 | endoribonuclease complex                         | 1/61 | 30/23271 | 0.07580.1509 | 1 |
| CC | GO:0008180 | COP9 signalosome                                 | 1/61 | 34/23271 | 0.08540.1537 | 1 |
| CC | GO:0034358 | plasma lipoprotein particle                      | 1/61 | 34/23271 | 0.08540.1537 | 1 |
| CC | GO:0097225 | sperm midpiece                                   | 1/61 | 34/23271 | 0.08540.1537 | 1 |
| CC | GO:1990777 | lipoprotein particle                             | 1/61 | 34/23271 | 0.08540.1537 | 1 |
| CC | GO:0031463 | Cul3-RING ubiquitin ligase<br>complex            | 1/61 | 35/23271 | 0.08780.1537 | 1 |
| CC | GO:0097386 | glial cell projection                            | 1/61 | 35/23271 | 0.08780.1537 | 1 |
| CC | GO:0005790 | smooth endoplasmic reticulum                     | 1/61 | 36/23271 | 0.09020.1537 | 1 |
| CC | GO:1905348 | endonuclease complex                             | 1/61 | 36/23271 | 0.09020.1537 | 1 |
| CC | GO:0032994 | protein-lipid complex                            | 1/61 | 37/23271 | 0.09260.1557 | 1 |
| CC | GO:0016235 | aggresome                                        | 1/61 | 38/23271 | 0.09500.1577 | 1 |
| CC | GO:0005637 | nuclear inner membrane                           | 1/61 | 45/23271 | 0.11150.1754 | 1 |
| CC | GO:0034707 | chloride channel complex                         | 1/61 | 46/23271 | 0.11380.1754 | 1 |
| CC | GO:0005771 | multivesicular body                              | 1/61 | 51/23271 | 0.12540.1847 | 1 |

|    |            |                                                            |      |           |        |        |   |
|----|------------|------------------------------------------------------------|------|-----------|--------|--------|---|
| CC | GO:0031312 | extrinsic component of organelle membrane                  | 1/61 | 56/23271  | 0.1368 | 0.1991 | 1 |
| CC | GO:0001917 | photoreceptor inner segment                                | 1/61 | 60/23271  | 0.1459 | 0.2076 | 1 |
| CC | GO:0014704 | intercalated disc                                          | 1/61 | 62/23271  | 0.1504 | 0.2116 | 1 |
| CC | GO:0000502 | proteasome complex                                         | 1/61 | 64/23271  | 0.1548 | 0.2155 | 1 |
| CC | GO:0016328 | lateral plasma membrane                                    | 1/61 | 66/23271  | 0.1593 | 0.2194 | 1 |
| CC | GO:0005905 | clathrin-coated pit                                        | 1/61 | 69/23271  | 0.1659 | 0.2243 | 1 |
| CC | GO:0010494 | cytoplasmic stress granule                                 | 1/61 | 70/23271  | 0.1681 | 0.2243 | 1 |
| CC | GO:1905369 | endopeptidase complex                                      | 1/61 | 70/23271  | 0.1681 | 0.2243 | 1 |
| CC | GO:0005793 | endoplasmic reticulum-Golgi intermediate compartment       | 1/61 | 72/23271  | 0.1724 | 0.2278 | 1 |
| CC | GO:0005844 | polysome                                                   | 1/61 | 74/23271  | 0.1768 | 0.2312 | 1 |
| CC | GO:0016605 | PML body                                                   | 1/61 | 75/23271  | 0.1789 | 0.2317 | 1 |
| CC | GO:0016234 | inclusion body                                             | 1/61 | 76/23271  | 0.1811 | 0.2322 | 1 |
| CC | GO:0031526 | brush border membrane                                      | 1/61 | 78/23271  | 0.1854 | 0.2353 | 1 |
| CC | GO:0035097 | histone methyltransferase complex                          | 1/61 | 80/23271  | 0.1897 | 0.2384 | 1 |
| CC | GO:1902554 | serine/threonine protein kinase complex                    | 1/61 | 83/23271  | 0.1961 | 0.2441 | 1 |
| CC | GO:0005788 | endoplasmic reticulum lumen                                | 1/61 | 85/23271  | 0.2003 | 0.2446 | 1 |
| CC | GO:0044291 | cell-cell contact zone                                     | 1/61 | 85/23271  | 0.2003 | 0.2446 | 1 |
| CC | GO:0030667 | secretory granule membrane                                 | 1/61 | 88/23271  | 0.2066 | 0.2500 | 1 |
| CC | GO:0030864 | cortical actin cytoskeleton                                | 1/61 | 89/23271  | 0.2087 | 0.2502 | 1 |
| CC | GO:0005791 | rough endoplasmic reticulum                                | 1/61 | 93/23271  | 0.2170 | 0.2577 | 1 |
| CC | GO:0032432 | actin filament bundle                                      | 1/61 | 95/23271  | 0.2211 | 0.2579 | 1 |
| CC | GO:1905368 | peptidase complex                                          | 1/61 | 95/23271  | 0.2211 | 0.2579 | 1 |
| CC | GO:0098839 | postsynaptic density membrane                              | 1/61 | 97/23271  | 0.2252 | 0.2603 | 1 |
| CC | GO:1902911 | protein kinase complex                                     | 1/61 | 99/23271  | 0.2293 | 0.2627 | 1 |
| CC | GO:0031234 | extrinsic component of cytoplasmic side of plasma membrane | 1/61 | 104/23271 | 0.2393 | 0.2717 | 1 |
| CC | GO:0034708 | methyltransferase complex                                  | 1/61 | 105/23271 | 0.2414 | 0.2717 | 1 |
| CC | GO:0045335 | phagocytic vesicle                                         | 1/61 | 111/23271 | 0.2533 | 0.2827 | 1 |
| CC | GO:0022626 | cytosolic ribosome                                         | 1/61 | 115/23271 | 0.2611 | 0.2862 | 1 |
| CC | GO:0030672 | synaptic vesicle membrane                                  | 1/61 | 116/23271 | 0.2630 | 0.2862 | 1 |
| CC | GO:0099501 | exocytic vesicle membrane                                  | 1/61 | 116/23271 | 0.2630 | 0.2862 | 1 |
| CC | GO:0005814 | centriole                                                  | 1/61 | 119/23271 | 0.2689 | 0.2901 | 1 |
| CC | GO:0030863 | cortical cytoskeleton                                      | 1/61 | 123/23271 | 0.2765 | 0.2959 | 1 |
| CC | GO:0005765 | lysosomal membrane                                         | 1/61 | 130/23271 | 0.2898 | 0.2978 | 1 |
| CC | GO:0098852 | lytic vacuole membrane                                     | 1/61 | 130/23271 | 0.2898 | 0.2978 | 1 |
| CC | GO:0001669 | acrosomal vesicle                                          | 1/61 | 134/23271 | 0.2972 | 0.3011 | 1 |

|    |            |                                                                                |      |           |        |        |   |
|----|------------|--------------------------------------------------------------------------------|------|-----------|--------|--------|---|
| CC | GO:0072686 | mitotic spindle                                                                | 1/61 | 135/23271 | 0.2991 | 0.3011 | 1 |
| CC | GO:0099634 | postsynaptic specialization<br>membrane                                        | 1/61 | 136/23271 | 0.3009 | 0.3011 | 1 |
| CC | GO:0005912 | adherens junction                                                              | 1/61 | 138/23271 | 0.3046 | 0.3011 | 1 |
| CC | GO:0005903 | brush border                                                                   | 1/61 | 140/23271 | 0.3083 | 0.3019 | 1 |
| CC | GO:0036126 | sperm flagellum                                                                | 1/61 | 141/23271 | 0.3101 | 0.3019 | 1 |
| CC | GO:0030658 | transport vesicle membrane                                                     | 1/61 | 147/23271 | 0.3209 | 0.3055 | 1 |
| CC | GO:0031256 | leading edge membrane                                                          | 1/61 | 150/23271 | 0.3263 | 0.3084 | 1 |
| CC | GO:0030176 | integral component of<br>endoplasmic reticulum<br>membrane                     | 1/61 | 153/23271 | 0.3316 | 0.3105 | 1 |
| CC | GO:0097729 | 9+2 motile cilium                                                              | 1/61 | 154/23271 | 0.3334 | 0.3105 | 1 |
| CC | GO:0090575 | RNA polymerase II<br>transcription regulator complex<br>intrinsic component of | 1/61 | 159/23271 | 0.3421 | 0.3142 | 1 |
| CC | GO:0031227 | endoplasmic reticulum<br>membrane                                              | 1/61 | 161/23271 | 0.3456 | 0.3151 | 1 |
| CC | GO:0031461 | cullin-RING ubiquitin ligase<br>complex                                        | 1/61 | 163/23271 | 0.3491 | 0.3154 | 1 |
| CC | GO:0042383 | sarcolemma                                                                     | 1/61 | 164/23271 | 0.3508 | 0.3154 | 1 |
| CC | GO:0009898 | cytoplasmic side of plasma<br>membrane                                         | 1/61 | 169/23271 | 0.3593 | 0.3208 | 1 |
| CC | GO:0005774 | vacuolar membrane                                                              | 1/61 | 183/23271 | 0.3826 | 0.3393 | 1 |
| CC | GO:0098562 | cytoplasmic side of membrane                                                   | 1/61 | 186/23271 | 0.3875 | 0.3404 | 1 |
| CC | GO:0098802 | plasma membrane signaling<br>receptor complex                                  | 1/61 | 187/23271 | 0.3891 | 0.3404 | 1 |
| CC | GO:0019897 | extrinsic component of plasma<br>membrane                                      | 1/61 | 189/23271 | 0.3923 | 0.3409 | 1 |
| CC | GO:0043197 | dendritic spine                                                                | 1/61 | 195/23271 | 0.4019 | 0.3469 | 1 |
| CC | GO:0044309 | neuron spine                                                                   | 1/61 | 200/23271 | 0.4097 | 0.3490 | 1 |
| CC | GO:0098862 | cluster of actin-based cell<br>projections                                     | 1/61 | 200/23271 | 0.4097 | 0.3490 | 1 |
| CC | GO:0005770 | late endosome                                                                  | 1/61 | 219/23271 | 0.4387 | 0.3713 | 1 |
| CC | GO:0099699 | integral component of synaptic<br>membrane                                     | 1/61 | 226/23271 | 0.4490 | 0.3775 | 1 |
| CC | GO:0005840 | ribosome                                                                       | 1/61 | 234/23271 | 0.4606 | 0.3847 | 1 |
| CC | GO:0061695 | transferase complex,<br>transferring phosphorus-<br>containing groups          | 1/61 | 241/23271 | 0.4705 | 0.3905 | 1 |
| CC | GO:0099240 | intrinsic component of synaptic<br>membrane                                    | 1/61 | 244/23271 | 0.4747 | 0.3913 | 1 |
| CC | GO:0031965 | nuclear membrane                                                               | 1/61 | 246/23271 | 0.4775 | 0.3913 | 1 |

|    |            |                                                  |      |           |        |        |   |
|----|------------|--------------------------------------------------|------|-----------|--------|--------|---|
| CC | GO:0005759 | mitochondrial matrix                             | 1/61 | 273/23271 | 0.5136 | 0.4182 | 1 |
| CC | GO:0000151 | ubiquitin ligase complex                         | 1/61 | 285/23271 | 0.5289 | 0.4280 | 1 |
| CC | GO:0034702 | ion channel complex                              | 1/61 | 296/23271 | 0.5425 | 0.4345 | 1 |
| CC | GO:0005819 | spindle                                          | 1/61 | 297/23271 | 0.5437 | 0.4345 | 1 |
| CC | GO:0005938 | cell cortex                                      | 1/61 | 307/23271 | 0.5557 | 0.4414 | 1 |
| CC | GO:1902495 | transmembrane transporter complex                | 1/61 | 312/23271 | 0.5615 | 0.4433 | 1 |
| CC | GO:1990351 | transporter complex                              | 1/61 | 319/23271 | 0.5696 | 0.4452 | 1 |
| CC | GO:0016607 | nuclear speck                                    | 1/61 | 320/23271 | 0.5708 | 0.4452 | 1 |
| CC | GO:0045211 | postsynaptic membrane                            | 1/61 | 330/23271 | 0.5820 | 0.4512 | 1 |
| CC | GO:0030659 | cytoplasmic vesicle membrane                     | 1/61 | 337/23271 | 0.5898 | 0.4545 | 1 |
| CC | GO:0012506 | vesicle membrane                                 | 1/61 | 363/23271 | 0.6172 | 0.4729 | 1 |
| CC | GO:0031301 | integral component of organelle membrane         | 1/61 | 368/23271 | 0.6223 | 0.4739 | 1 |
| CC | GO:0031300 | intrinsic component of organelle membrane        | 1/61 | 403/23271 | 0.6560 | 0.4967 | 1 |
| CC | GO:0019866 | organelle inner membrane                         | 1/61 | 489/23271 | 0.7267 | 0.5470 | 1 |
| MF | GO:0005381 | iron ion transmembrane transporter activity      | 1/58 | 10/22669  | 0.0253 | 0.0704 | 1 |
| MF | GO:0008526 | phosphatidylinositol transfer activity           | 1/58 | 10/22669  | 0.0253 | 0.0704 | 1 |
| MF | GO:0016175 | superoxide-generating NAD(P)H oxidase activity   | 1/58 | 10/22669  | 0.0253 | 0.0704 | 1 |
| MF | GO:0050544 | arachidonic acid binding                         | 1/58 | 10/22669  | 0.0253 | 0.0704 | 1 |
| MF | GO:0061578 | Lys63-specific deubiquitinase activity           | 1/58 | 10/22669  | 0.0253 | 0.0704 | 1 |
| MF | GO:0102391 | decanoate-CoA ligase activity                    | 1/58 | 10/22669  | 0.0253 | 0.0704 | 1 |
| MF | GO:0005247 | voltage-gated chloride channel activity          | 1/58 | 11/22669  | 0.0278 | 0.0704 | 1 |
| MF | GO:0008330 | protein tyrosine/threonine phosphatase activity  | 1/58 | 11/22669  | 0.0278 | 0.0704 | 1 |
| MF | GO:0017128 | phospholipid scramblase activity                 | 1/58 | 11/22669  | 0.0278 | 0.0704 | 1 |
| MF | GO:0019107 | myristoyltransferase activity                    | 1/58 | 11/22669  | 0.0278 | 0.0704 | 1 |
| MF | GO:0047676 | arachidonate-CoA ligase activity                 | 1/58 | 11/22669  | 0.0278 | 0.0704 | 1 |
| MF | GO:0050542 | icosanoid binding                                | 1/58 | 11/22669  | 0.0278 | 0.0704 | 1 |
| MF | GO:0050543 | icosatetraenoic acid binding                     | 1/58 | 11/22669  | 0.0278 | 0.0704 | 1 |
| MF | GO:0001224 | RNA polymerase II transcription cofactor binding | 1/58 | 12/22669  | 0.0303 | 0.0748 | 1 |
| MF | GO:0005536 | glucose binding                                  | 1/58 | 12/22669  | 0.0303 | 0.0748 | 1 |

|    |            |                                                                |      |          |        |        |   |
|----|------------|----------------------------------------------------------------|------|----------|--------|--------|---|
| MF | GO:0008525 | phosphatidylcholine transporter activity                       | 1/58 | 13/22669 | 0.0328 | 0.0770 | 1 |
| MF | GO:0017017 | MAP kinase tyrosine/serine/threonine phosphatase activity      | 1/58 | 13/22669 | 0.0328 | 0.0770 | 1 |
| MF | GO:0042301 | phosphate ion binding                                          | 1/58 | 13/22669 | 0.0328 | 0.0770 | 1 |
| MF | GO:0004303 | estradiol 17-beta-dehydrogenase activity                       | 1/58 | 14/22669 | 0.0352 | 0.0771 | 1 |
| MF | GO:0004467 | long-chain fatty acid-CoA ligase activity                      | 1/58 | 14/22669 | 0.0352 | 0.0771 | 1 |
| MF | GO:0015562 | efflux transmembrane transporter activity                      | 1/58 | 14/22669 | 0.0352 | 0.0771 | 1 |
| MF | GO:0016595 | glutamate binding                                              | 1/58 | 14/22669 | 0.0352 | 0.0771 | 1 |
| MF | GO:0033549 | MAP kinase phosphatase activity                                | 1/58 | 14/22669 | 0.0352 | 0.0771 | 1 |
| MF | GO:0070700 | BMP receptor binding                                           | 1/58 | 14/22669 | 0.0352 | 0.0771 | 1 |
| MF | GO:0005229 | intracellular calcium activated chloride channel activity      | 1/58 | 15/22669 | 0.0377 | 0.0790 | 1 |
| MF | GO:0016725 | oxidoreductase activity, acting on CH or CH2 groups            | 1/58 | 15/22669 | 0.0377 | 0.0790 | 1 |
| MF | GO:0045236 | CXCR chemokine receptor binding                                | 1/58 | 15/22669 | 0.0377 | 0.0790 | 1 |
| MF | GO:0061778 | intracellular chloride channel activity                        | 1/58 | 15/22669 | 0.0377 | 0.0790 | 1 |
| MF | GO:0008308 | voltage-gated anion channel activity                           | 1/58 | 16/22669 | 0.0402 | 0.0798 | 1 |
| MF | GO:0030228 | lipoprotein particle receptor activity                         | 1/58 | 16/22669 | 0.0402 | 0.0798 | 1 |
| MF | GO:0050664 | oxidoreductase activity, acting on NAD(P)H, oxygen as acceptor | 1/58 | 16/22669 | 0.0402 | 0.0798 | 1 |
| MF | GO:0016290 | palmitoyl-CoA hydrolase activity                               | 1/58 | 17/22669 | 0.0426 | 0.0830 | 1 |
| MF | GO:0071617 | lysophospholipid acyltransferase activity                      | 1/58 | 17/22669 | 0.0426 | 0.0830 | 1 |
| MF | GO:0008199 | ferric iron binding                                            | 1/58 | 18/22669 | 0.0451 | 0.0851 | 1 |
| MF | GO:0034185 | apolipoprotein binding modified amino acid                     | 1/58 | 18/22669 | 0.0451 | 0.0851 | 1 |
| MF | GO:0072349 | transmembrane transporter activity                             | 1/58 | 18/22669 | 0.0451 | 0.0851 | 1 |
| MF | GO:0031434 | mitogen-activated protein kinase kinase binding                | 1/58 | 19/22669 | 0.0475 | 0.0872 | 1 |

|    |            |                                                                   |      |          |        |        |   |
|----|------------|-------------------------------------------------------------------|------|----------|--------|--------|---|
| MF | GO:0055106 | ubiquitin-protein transferase<br>regulator activity               | 1/58 | 20/22669 | 0.0500 | 0.0900 | 1 |
| MF | GO:0120020 | cholesterol transfer activity                                     | 1/58 | 20/22669 | 0.0500 | 0.0900 | 1 |
| MF | GO:0120015 | sterol transfer activity                                          | 1/58 | 21/22669 | 0.0524 | 0.0920 | 1 |
| MF | GO:0005540 | hyaluronic acid binding                                           | 1/58 | 22/22669 | 0.0548 | 0.0920 | 1 |
| MF | GO:0016408 | C-acyltransferase activity                                        | 1/58 | 22/22669 | 0.0548 | 0.0920 | 1 |
| MF | GO:0120014 | phospholipid transfer activity                                    | 1/58 | 22/22669 | 0.0548 | 0.0920 | 1 |
| MF | GO:0051787 | misfolded protein binding                                         | 1/58 | 23/22669 | 0.0572 | 0.0920 | 1 |
|    |            | RNA polymerase II core                                            |      |          |        |        |   |
| MF | GO:0000979 | promoter sequence-specific<br>DNA binding                         | 1/58 | 24/22669 | 0.0597 | 0.0920 | 1 |
| MF | GO:0070696 | transmembrane receptor protein<br>serine/threonine kinase binding | 1/58 | 24/22669 | 0.0597 | 0.0920 | 1 |
| MF | GO:0140303 | intramembrane lipid transporter<br>activity                       | 1/58 | 24/22669 | 0.0597 | 0.0920 | 1 |
| MF | GO:0005160 | transforming growth factor beta<br>receptor binding               | 1/58 | 25/22669 | 0.0621 | 0.0920 | 1 |
| MF | GO:0005212 | structural constituent of eye lens                                | 1/58 | 25/22669 | 0.0621 | 0.0920 | 1 |
| MF | GO:0005227 | calcium activated cation<br>channel activity                      | 1/58 | 25/22669 | 0.0621 | 0.0920 | 1 |
| MF | GO:0016866 | intramolecular transferase<br>activity                            | 1/58 | 25/22669 | 0.0621 | 0.0920 | 1 |
| MF | GO:0019957 | C-C chemokine binding                                             | 1/58 | 25/22669 | 0.0621 | 0.0920 | 1 |
| MF | GO:0048027 | mRNA 5'-UTR binding                                               | 1/58 | 25/22669 | 0.0621 | 0.0920 | 1 |
| MF | GO:0001618 | virus receptor activity                                           | 1/58 | 26/22669 | 0.0645 | 0.0920 | 1 |
| MF | GO:0047617 | acyl-CoA hydrolase activity                                       | 1/58 | 26/22669 | 0.0645 | 0.0920 | 1 |
| MF | GO:0140272 | exogenous protein binding                                         | 1/58 | 26/22669 | 0.0645 | 0.0920 | 1 |
| MF | GO:1904680 | peptide transmembrane<br>transporter activity                     | 1/58 | 27/22669 | 0.0669 | 0.0947 | 1 |
| MF | GO:0001223 | transcription coactivator<br>binding                              | 1/58 | 28/22669 | 0.0693 | 0.0953 | 1 |
| MF | GO:0016289 | CoA hydrolase activity                                            | 1/58 | 28/22669 | 0.0693 | 0.0953 | 1 |
| MF | GO:0035925 | mRNA 3'-UTR AU-rich region<br>binding                             | 1/58 | 28/22669 | 0.0693 | 0.0953 | 1 |
| MF | GO:0017091 | AU-rich element binding                                           | 1/58 | 29/22669 | 0.0716 | 0.0965 | 1 |
| MF | GO:0030291 | protein serine/threonine kinase<br>inhibitor activity             | 1/58 | 29/22669 | 0.0716 | 0.0965 | 1 |
| MF | GO:0045499 | chemorepellent activity                                           | 1/58 | 29/22669 | 0.0716 | 0.0965 | 1 |
| MF | GO:0015248 | sterol transporter activity                                       | 1/58 | 30/22669 | 0.0740 | 0.0990 | 1 |
| MF | GO:0071813 | lipoprotein particle binding                                      | 1/58 | 31/22669 | 0.0764 | 0.1008 | 1 |
| MF | GO:0071814 | protein-lipid complex binding                                     | 1/58 | 31/22669 | 0.0764 | 0.1008 | 1 |



|    |            |                                                                                              |      |          |        |        |   |
|----|------------|----------------------------------------------------------------------------------------------|------|----------|--------|--------|---|
| MF | GO:0033612 | receptor serine/threonine kinase binding                                                     | 1/58 | 32/22669 | 0.0788 | 0.1025 | 1 |
| MF | GO:0035035 | histone acetyltransferase binding                                                            | 1/58 | 32/22669 | 0.0788 | 0.1025 | 1 |
| MF | GO:0019956 | chemokine binding                                                                            | 1/58 | 33/22669 | 0.0811 | 0.1035 | 1 |
| MF | GO:0051059 | NF-kappaB binding                                                                            | 1/58 | 33/22669 | 0.0811 | 0.1035 | 1 |
| MF | GO:0008198 | ferrous iron binding                                                                         | 1/58 | 35/22669 | 0.0858 | 0.1081 | 1 |
| MF | GO:0005154 | epidermal growth factor receptor binding                                                     | 1/58 | 36/22669 | 0.0882 | 0.1089 | 1 |
| MF | GO:0015175 | neutral amino acid transmembrane transporter activity                                        | 1/58 | 36/22669 | 0.0882 | 0.1089 | 1 |
| MF | GO:0031369 | translation initiation factor binding                                                        | 1/58 | 37/22669 | 0.0905 | 0.1104 | 1 |
| MF | GO:0008138 | protein tyrosine/serine/threonine phosphatase activity                                       | 1/58 | 38/22669 | 0.0928 | 0.1104 | 1 |
| MF | GO:0033764 | steroid dehydrogenase activity, acting on the CH-OH group of donors, NAD or NADP as acceptor | 1/58 | 38/22669 | 0.0928 | 0.1104 | 1 |
| MF | GO:0046915 | transition metal ion transmembrane transporter activity                                      | 1/58 | 38/22669 | 0.0928 | 0.1104 | 1 |
| MF | GO:1901682 | sulfur compound transmembrane transporter activity                                           | 1/58 | 38/22669 | 0.0928 | 0.1104 | 1 |
| MF | GO:0035255 | ionotropic glutamate receptor binding                                                        | 1/58 | 39/22669 | 0.0952 | 0.1124 | 1 |
| MF | GO:0042805 | actinin binding                                                                              | 1/58 | 40/22669 | 0.0975 | 0.1124 | 1 |
| MF | GO:0043531 | ADP binding                                                                                  | 1/58 | 40/22669 | 0.0975 | 0.1124 | 1 |
| MF | GO:0051539 | 4 iron, 4 sulfur cluster binding                                                             | 1/58 | 40/22669 | 0.0975 | 0.1124 | 1 |
| MF | GO:0001965 | G-protein alpha-subunit binding                                                              | 1/58 | 41/22669 | 0.0998 | 0.1137 | 1 |
| MF | GO:0120013 | lipid transfer activity                                                                      | 1/58 | 41/22669 | 0.0998 | 0.1137 | 1 |
| MF | GO:0022839 | ion gated channel activity                                                                   | 1/58 | 42/22669 | 0.1021 | 0.1150 | 1 |
| MF | GO:0051019 | mitogen-activated protein kinase binding                                                     | 1/58 | 42/22669 | 0.1021 | 0.1150 | 1 |
| MF | GO:0018024 | histone-lysine N-methyltransferase activity                                                  | 1/58 | 43/22669 | 0.1044 | 0.1155 | 1 |
| MF | GO:0004177 | aminopeptidase activity                                                                      | 1/58 | 44/22669 | 0.1067 | 0.1155 | 1 |
| MF | GO:0008009 | chemokine activity                                                                           | 1/58 | 44/22669 | 0.1067 | 0.1155 | 1 |
| MF | GO:0042169 | SH2 domain binding                                                                           | 1/58 | 44/22669 | 0.1067 | 0.1155 | 1 |

|    |            |                                                           |      |          |        |        |   |
|----|------------|-----------------------------------------------------------|------|----------|--------|--------|---|
| MF | GO:0042887 | amide transmembrane transporter activity                  | 1/58 | 44/22669 | 0.1067 | 0.1155 | 1 |
| MF | GO:0016229 | steroid dehydrogenase activity                            | 1/58 | 45/22669 | 0.1090 | 0.1173 | 1 |
| MF | GO:0008374 | O-acyltransferase activity                                | 1/58 | 46/22669 | 0.1113 | 0.1184 | 1 |
| MF | GO:0015485 | cholesterol binding                                       | 1/58 | 46/22669 | 0.1113 | 0.1184 | 1 |
| MF | GO:0050661 | NADP binding                                              | 1/58 | 48/22669 | 0.1158 | 0.1219 | 1 |
| MF | GO:0051879 | Hsp90 protein binding                                     | 1/58 | 48/22669 | 0.1158 | 0.1219 | 1 |
| MF | GO:0001102 | RNA polymerase II activating transcription factor binding | 1/58 | 49/22669 | 0.1181 | 0.1236 | 1 |
| MF | GO:0001046 | core promoter sequence-specific DNA binding               | 1/58 | 50/22669 | 0.1203 | 0.1240 | 1 |
| MF | GO:0016790 | thiolester hydrolase activity                             | 1/58 | 50/22669 | 0.1203 | 0.1240 | 1 |
| MF | GO:0004601 | peroxidase activity                                       | 1/58 | 53/22669 | 0.1271 | 0.1282 | 1 |
| MF | GO:0004879 | nuclear receptor activity                                 | 1/58 | 53/22669 | 0.1271 | 0.1282 | 1 |
| MF | GO:0017046 | peptide hormone binding                                   | 1/58 | 53/22669 | 0.1271 | 0.1282 | 1 |
| MF | GO:0098531 | ligand-activated transcription factor activity            | 1/58 | 53/22669 | 0.1271 | 0.1282 | 1 |
| MF | GO:0003707 | steroid hormone receptor activity                         | 1/58 | 54/22669 | 0.1293 | 0.1298 | 1 |
| MF | GO:0032934 | sterol binding                                            | 1/58 | 55/22669 | 0.1316 | 0.1313 | 1 |
| MF | GO:0016836 | hydro-lyase activity                                      | 1/58 | 56/22669 | 0.1338 | 0.1329 | 1 |
| MF | GO:0016278 | lysine N-methyltransferase activity                       | 1/58 | 57/22669 | 0.1360 | 0.1330 | 1 |
| MF | GO:0016279 | protein-lysine N-methyltransferase activity               | 1/58 | 57/22669 | 0.1360 | 0.1330 | 1 |
| MF | GO:0042054 | histone methyltransferase activity                        | 1/58 | 57/22669 | 0.1360 | 0.1330 | 1 |
| MF | GO:0001540 | amyloid-beta binding                                      | 1/58 | 58/22669 | 0.1382 | 0.1338 | 1 |
| MF | GO:0016684 | oxidoreductase activity, acting on peroxide as acceptor   | 1/58 | 58/22669 | 0.1382 | 0.1338 | 1 |
| MF | GO:0001221 | transcription cofactor binding                            | 1/58 | 59/22669 | 0.1404 | 0.1353 | 1 |
| MF | GO:0005507 | copper ion binding                                        | 1/58 | 61/22669 | 0.1449 | 0.1375 | 1 |
| MF | GO:0051287 | NAD binding                                               | 1/58 | 61/22669 | 0.1449 | 0.1375 | 1 |
| MF | GO:0043022 | ribosome binding                                          | 1/58 | 62/22669 | 0.1470 | 0.1382 | 1 |
| MF | GO:0070063 | RNA polymerase binding                                    | 1/58 | 62/22669 | 0.1470 | 0.1382 | 1 |
| MF | GO:0000049 | tRNA binding                                              | 1/58 | 64/22669 | 0.1514 | 0.1409 | 1 |
| MF | GO:0051536 | iron-sulfur cluster binding                               | 1/58 | 66/22669 | 0.1558 | 0.1435 | 1 |
| MF | GO:0051540 | metal cluster binding                                     | 1/58 | 66/22669 | 0.1558 | 0.1435 | 1 |
| MF | GO:0004722 | protein serine/threonine phosphatase activity             | 1/58 | 67/22669 | 0.1579 | 0.1435 | 1 |
| MF | GO:0016835 | carbon-oxygen lyase activity                              | 1/58 | 67/22669 | 0.1579 | 0.1435 | 1 |

|    |            |                                                      |      |           |        |        |   |
|----|------------|------------------------------------------------------|------|-----------|--------|--------|---|
| MF | GO:0035254 | glutamate receptor binding                           | 1/58 | 67/22669  | 0.1579 | 0.1435 | 1 |
| MF | GO:0016597 | amino acid binding                                   | 1/58 | 70/22669  | 0.1644 | 0.1487 | 1 |
| MF | GO:0002039 | p53 binding                                          | 1/58 | 71/22669  | 0.1665 | 0.1492 | 1 |
| MF | GO:0005518 | collagen binding                                     | 1/58 | 71/22669  | 0.1665 | 0.1492 | 1 |
| MF | GO:0005254 | chloride channel activity                            | 1/58 | 73/22669  | 0.1708 | 0.1516 | 1 |
| MF | GO:0038024 | cargo receptor activity                              | 1/58 | 76/22669  | 0.1772 | 0.1566 | 1 |
| MF | GO:0042379 | chemokine receptor binding                           | 1/58 | 78/22669  | 0.1814 | 0.1596 | 1 |
| MF | GO:0048029 | monosaccharide binding                               | 1/58 | 82/22669  | 0.1898 | 0.1657 | 1 |
| MF | GO:0005253 | anion channel activity                               | 1/58 | 83/22669  | 0.1919 | 0.1657 | 1 |
| MF | GO:0008081 | phosphoric diester hydrolase activity                | 1/58 | 83/22669  | 0.1919 | 0.1657 | 1 |
| MF | GO:0016651 | oxidoreductase activity, acting on NAD(P)H           | 1/58 | 83/22669  | 0.1919 | 0.1657 | 1 |
| MF | GO:0016209 | antioxidant activity                                 | 1/58 | 84/22669  | 0.1939 | 0.1668 | 1 |
| MF | GO:0043178 | alcohol binding                                      | 1/58 | 85/22669  | 0.1960 | 0.1678 | 1 |
| MF | GO:0008276 | protein methyltransferase activity                   | 1/58 | 88/22669  | 0.2022 | 0.1716 | 1 |
| MF | GO:0042562 | hormone binding                                      | 1/58 | 88/22669  | 0.2022 | 0.1716 | 1 |
| MF | GO:0048306 | calcium-dependent protein binding                    | 1/58 | 89/22669  | 0.2042 | 0.1726 | 1 |
| MF | GO:0008238 | exopeptidase activity                                | 1/58 | 91/22669  | 0.2083 | 0.1752 | 1 |
| MF | GO:0004620 | phospholipase activity                               | 1/58 | 93/22669  | 0.2124 | 0.1779 | 1 |
| MF | GO:0031490 | chromatin DNA binding                                | 1/58 | 94/22669  | 0.2144 | 0.1788 | 1 |
| MF | GO:0003730 | mRNA 3'-UTR binding                                  | 1/58 | 98/22669  | 0.2224 | 0.1816 | 1 |
| MF | GO:0004725 | protein tyrosine phosphatase activity                | 1/58 | 98/22669  | 0.2224 | 0.1816 | 1 |
| MF | GO:0004896 | cytokine receptor activity                           | 1/58 | 98/22669  | 0.2224 | 0.1816 | 1 |
| MF | GO:0004843 | thiol-dependent ubiquitin-specific protease activity | 1/58 | 99/22669  | 0.2244 | 0.1824 | 1 |
| MF | GO:0101005 | ubiquitinyl hydrolase activity<br>ATPase-coupled     | 1/58 | 100/22669 | 0.2264 | 0.1833 | 1 |
| MF | GO:0042626 | transmembrane transporter activity                   | 1/58 | 101/22669 | 0.2284 | 0.1841 | 1 |
| MF | GO:0015108 | chloride transmembrane transporter activity          | 1/58 | 102/22669 | 0.2304 | 0.1849 | 1 |
| MF | GO:0051219 | phosphoprotein binding                               | 1/58 | 104/22669 | 0.2344 | 0.1865 | 1 |
| MF | GO:0008242 | omega peptidase activity                             | 1/58 | 107/22669 | 0.2402 | 0.1904 | 1 |
| MF | GO:0015399 | primary active transmembrane transporter activity    | 1/58 | 108/22669 | 0.2422 | 0.1912 | 1 |
| MF | GO:0005496 | steroid binding                                      | 1/58 | 119/22669 | 0.2634 | 0.2071 | 1 |
| MF | GO:0140375 | immune receptor activity                             | 1/58 | 123/22669 | 0.2709 | 0.2113 | 1 |

|    |                                                                         |      |           |        |        |   |
|----|-------------------------------------------------------------------------|------|-----------|--------|--------|---|
| MF | GO:0045182 translation regulator activity                               | 1/58 | 127/22669 | 0.2784 | 0.2154 | 1 |
| MF | GO:0016298 lipase activity                                              | 1/58 | 128/22669 | 0.2802 | 0.2159 | 1 |
| MF | GO:0047485 protein N-terminus binding                                   | 1/58 | 129/22669 | 0.2821 | 0.2165 | 1 |
| MF | GO:0005179 hormone activity                                             | 1/58 | 130/22669 | 0.2839 | 0.2170 | 1 |
| MF | GO:0015103 inorganic anion transmembrane transporter activity           | 1/58 | 136/22669 | 0.2949 | 0.2246 | 1 |
| MF | GO:0043021 ribonucleoprotein complex binding                            | 1/58 | 146/22669 | 0.3129 | 0.2354 | 1 |
| MF | GO:0019838 growth factor binding                                        | 1/58 | 147/22669 | 0.3146 | 0.2358 | 1 |
| MF | GO:0035257 nuclear hormone receptor binding                             | 1/58 | 152/22669 | 0.3234 | 0.2405 | 1 |
| MF | GO:0072509 divalent inorganic cation transmembrane transporter activity | 1/58 | 163/22669 | 0.3423 | 0.2536 | 1 |
| MF | GO:0004721 phosphoprotein phosphatase activity                          | 1/58 | 171/22669 | 0.3558 | 0.2626 | 1 |
| MF | GO:0003714 transcription corepressor activity                           | 1/58 | 176/22669 | 0.3640 | 0.2677 | 1 |
| MF | GO:0051427 hormone receptor binding                                     | 1/58 | 181/22669 | 0.3722 | 0.2726 | 1 |
| MF | GO:0004252 serine-type endopeptidase activity                           | 1/58 | 186/22669 | 0.3803 | 0.2775 | 1 |
| MF | GO:0005244 voltage-gated ion channel activity                           | 1/58 | 190/22669 | 0.3866 | 0.2800 | 1 |
| MF | GO:0022832 voltage-gated channel activity                               | 1/58 | 190/22669 | 0.3866 | 0.2800 | 1 |
| MF | GO:0008236 serine-type peptidase activity                               | 1/58 | 207/22669 | 0.4130 | 0.2980 | 1 |
| MF | GO:0051015 actin filament binding                                       | 1/58 | 210/22669 | 0.4175 | 0.3001 | 1 |
| MF | GO:0017171 serine hydrolase activity                                    | 1/58 | 212/22669 | 0.4205 | 0.3011 | 1 |
| MF | GO:0005539 glycosaminoglycan binding                                    | 1/58 | 213/22669 | 0.4220 | 0.3011 | 1 |
| MF | GO:0015291 secondary active transmembrane transporter activity          | 1/58 | 231/22669 | 0.4483 | 0.3187 | 1 |
| MF | GO:0005096 GTPase activator activity                                    | 1/58 | 238/22669 | 0.4582 | 0.3245 | 1 |
| MF | GO:0030695 GTPase regulator activity                                    | 1/58 | 258/22669 | 0.4856 | 0.3426 | 1 |
| MF | GO:0008017 microtubule binding                                          | 1/58 | 260/22669 | 0.4882 | 0.3433 | 1 |
| MF | GO:0016791 phosphatase activity                                         | 1/58 | 271/22669 | 0.5026 | 0.3521 | 1 |
| MF | GO:0030246 carbohydrate binding                                         | 1/58 | 274/22669 | 0.5065 | 0.3535 | 1 |
| MF | GO:0060589 nucleoside-triphosphatase regulator activity                 | 1/58 | 298/22669 | 0.5363 | 0.3729 | 1 |
| MF | GO:0001664 G protein-coupled receptor binding                           | 1/58 | 310/22669 | 0.5505 | 0.3815 | 1 |
| MF | GO:0022836 gated channel activity                                       | 1/58 | 323/22669 | 0.5654 | 0.3904 | 1 |

|    |            |                                              |      |           |        |        |   |
|----|------------|----------------------------------------------|------|-----------|--------|--------|---|
| MF | GO:0005261 | cation channel activity                      | 1/58 | 327/22669 | 0.5699 | 0.3921 | 1 |
| MF | GO:0015631 | tubulin binding                              | 1/58 | 366/22669 | 0.6114 | 0.4191 | 1 |
| MF | GO:0004842 | ubiquitin-protein transferase activity       | 1/58 | 418/22669 | 0.6607 | 0.4513 | 1 |
| MF | GO:0005216 | ion channel activity                         | 1/58 | 421/22669 | 0.6633 | 0.4515 | 1 |
| MF | GO:0046873 | metal ion transmembrane transporter activity | 1/58 | 426/22669 | 0.6677 | 0.4529 | 1 |
| MF | GO:0003779 | actin binding                                | 1/58 | 434/22669 | 0.6746 | 0.4549 | 1 |
| MF | GO:0019787 | ubiquitin-like protein transferase activity  | 1/58 | 435/22669 | 0.6754 | 0.4549 | 1 |
| MF | GO:0004175 | endopeptidase activity                       | 1/58 | 453/22669 | 0.6903 | 0.4628 | 1 |
| MF | GO:0008047 | enzyme activator activity                    | 1/58 | 460/22669 | 0.6959 | 0.4628 | 1 |
| MF | GO:0015267 | channel activity                             | 1/58 | 461/22669 | 0.6967 | 0.4628 | 1 |
| MF | GO:0022803 | passive transmembrane transporter activity   | 1/58 | 461/22669 | 0.6967 | 0.4628 | 1 |

**Table S8 Significant Enrichment Results of GO Analysis of IRGs**

| ON | TOL  | OG  | ID  | Description                                          | GeneRatio | BgR  | pval | qval | o | C  |
|----|------|-----|-----|------------------------------------------------------|-----------|------|------|------|---|----|
| Y  |      |     |     |                                                      |           | atio | ue   | ue   | u | nt |
|    |      |     | GO: |                                                      |           | 369  | 5.30 | 9.79 |   |    |
| BP | 0019 | 221 |     | cytokine-mediated signaling pathway                  | 63/292    | /23  | E-   | E-   | 6 | 3  |
|    |      |     | GO: |                                                      |           | 418  | 2.96 | 2.73 |   |    |
| BP | 0032 | 103 |     | positive regulation of response to external stimulus | 62/292    | /23  | E-   | E-   | 6 | 2  |
|    |      |     | GO: |                                                      |           | 303  | 2.37 | 1.46 |   |    |
| BP | 0060 | 326 |     | cell chemotaxis                                      | 54/292    | /23  | E-   | E-   | 5 | 4  |
|    |      |     | GO: |                                                      |           | 449  | 6.23 | 2.88 |   |    |
| BP | 0001 | 819 |     | positive regulation of cytokine production           | 60/292    | /23  | E-   | E-   | 6 | 0  |
|    |      |     | GO: |                                                      |           | 372  | 3.27 | 1.21 |   |    |
| BP | 0050 | 727 |     | regulation of inflammatory response                  | 53/292    | /23  | E-   | E-   | 5 | 3  |
|    |      |     | GO: |                                                      |           | 360  | 1.47 | 4.53 |   |    |
| BP | 0050 | 900 |     | leukocyte migration                                  | 51/292    | /23  | E-   | E-   | 5 | 1  |
|    |      |     | GO: |                                                      |           | 493  | 4.55 | 1.18 |   |    |
| BP | 0055 | 074 |     | calcium ion homeostasis                              | 56/292    | /23  | E-   | E-   | 5 | 6  |
|    |      |     |     |                                                      |           | 328  | 37   | 34   |   |    |

|    |                                                                 |        |     |      |      |   |
|----|-----------------------------------------------------------------|--------|-----|------|------|---|
|    | GO:                                                             |        | 224 | 5.12 | 1.18 | 4 |
| BP | 0050 regulation of chemotaxis                                   | 42/292 | /23 | E-   | E-   | 2 |
|    | 920                                                             |        | 328 | 37   | 34   |   |
|    | GO:                                                             |        | 219 | 4.07 | 8.34 | 4 |
| BP | 0030 leukocyte chemotaxis                                       | 41/292 | /23 | E-   | E-   | 1 |
|    | 595                                                             |        | 328 | 36   | 34   |   |
|    | GO:                                                             |        | 476 | 1.28 | 2.37 | 5 |
| BP | 0006 cellular calcium ion homeostasis                           | 53/292 | /23 | E-   | E-   | 3 |
|    | 874                                                             |        | 328 | 34   | 32   |   |
|    | GO:                                                             |        | 375 | 3.50 | 5.87 | 4 |
| BP | 0051 regulation of cytosolic calcium ion concentration          | 48/292 | /23 | E-   | E-   | 8 |
|    | 480                                                             |        | 328 | 34   | 32   |   |
|    | GO:                                                             |        | 330 | 2.78 | 4.28 | 4 |
| BP | 0007 positive regulation of cytosolic calcium ion concentration | 45/292 | /23 | E-   | E-   | 5 |
|    | 204                                                             |        | 328 | 33   | 31   |   |
|    | GO:                                                             |        | 322 | 1.38 | 1.95 | 4 |
| BP | 0018 peptidyl-tyrosine phosphorylation                          | 44/292 | /23 | E-   | E-   | 4 |
|    | 108                                                             |        | 328 | 32   | 30   |   |
|    | GO:                                                             |        | 325 | 2.06 | 2.72 | 4 |
| BP | 0018 peptidyl-tyrosine modification                             | 44/292 | /23 | E-   | E-   | 4 |
|    | 212                                                             |        | 328 | 32   | 30   |   |
|    | GO:                                                             |        | 219 | 6.20 | 7.63 | 3 |
| BP | 0097 myeloid leukocyte migration                                | 37/292 | /23 | E-   | E-   | 7 |
|    | 529                                                             |        | 328 | 31   | 29   |   |
|    | GO:                                                             |        | 278 | 2.22 | 2.56 | 3 |
| BP | 0031 positive regulation of defense response                    | 39/292 | /23 | E-   | E-   | 9 |
|    | 349                                                             |        | 328 | 29   | 27   |   |
|    | GO:                                                             |        | 234 | 1.27 | 1.38 | 3 |
| BP | 0032 regulation of mononuclear cell proliferation               | 36/292 | /23 | E-   | E-   | 6 |
|    | 944                                                             |        | 328 | 28   | 26   |   |
|    | GO:                                                             |        | 440 | 8.23 | 8.44 | 4 |
| BP | 0002 regulation of immune effector process                      | 45/292 | /23 | E-   | E-   | 5 |
|    | 697                                                             |        | 328 | 28   | 26   |   |
|    | GO:                                                             |        | 149 | 1.28 | 1.20 | 3 |
| BP | 0050 positive regulation of chemotaxis                          | 30/292 | /23 | E-   | E-   | 0 |
|    | 921                                                             |        | 328 | 27   | 25   |   |
|    | GO:                                                             |        | 231 | 1.30 | 1.20 | 3 |
| BP | 0050 regulation of lymphocyte proliferation                     | 35/292 | /23 | E-   | E-   | 5 |
|    | 670                                                             |        | 328 | 27   | 25   |   |
|    | GO:                                                             |        | 251 | 1.62 | 1.42 | 3 |
| BP | 0070 regulation of leukocyte proliferation                      | 36/292 | /23 | E-   | E-   | 6 |
|    | 663                                                             |        | 328 | 27   | 25   |   |

|    |                                                               |        |     |      |      |   |
|----|---------------------------------------------------------------|--------|-----|------|------|---|
|    | GO:                                                           |        | 356 | 2.10 | 1.76 | 4 |
| BP | 1901 regulation of vasculature development                    | 41/292 | /23 | E-   | E-   | 1 |
|    | 342                                                           |        | 328 | 27   | 25   |   |
|    | GO:                                                           |        | 440 | 8.57 | 6.66 | 4 |
| BP | 0045 positive regulation of protein kinase activity           | 44/292 | /23 | E-   | E-   | 4 |
|    | 860                                                           |        | 328 | 27   | 25   |   |
|    | GO:                                                           |        | 263 | 8.67 | 6.66 | 3 |
| BP | 0050 regulation of peptidyl-tyrosine phosphorylation          | 36/292 | /23 | E-   | E-   | 6 |
|    | 730                                                           |        | 328 | 27   | 25   |   |
|    | GO:                                                           |        | 195 | 1.92 | 1.42 | 3 |
| BP | 0050 positive regulation of peptidyl-tyrosine phosphorylation | 32/292 | /23 | E-   | E-   | 2 |
|    | 731                                                           |        | 328 | 26   | 24   |   |
|    | GO:                                                           |        | 384 | 4.16 | 2.95 | 4 |
| BP | 0032 negative regulation of response to external stimulus     | 41/292 | /23 | E-   | E-   | 1 |
|    | 102                                                           |        | 328 | 26   | 24   |   |
|    | GO:                                                           |        | 320 | 6.22 | 4.10 | 3 |
| BP | 0032 mononuclear cell proliferation                           | 38/292 | /23 | E-   | E-   | 8 |
|    | 943                                                           |        | 328 | 26   | 24   |   |
|    | GO:                                                           |        | 320 | 6.22 | 4.10 | 3 |
| BP | 0045 regulation of angiogenesis                               | 38/292 | /23 | E-   | E-   | 8 |
|    | 765                                                           |        | 328 | 26   | 24   |   |
|    | GO:                                                           |        | 389 | 6.90 | 4.39 | 4 |
| BP | 0002 response to molecule of bacterial origin                 | 41/292 | /23 | E-   | E-   | 1 |
|    | 237                                                           |        | 328 | 26   | 24   |   |
|    | GO:                                                           |        | 344 | 7.73 | 4.75 | 3 |
| BP | 0070 leukocyte proliferation                                  | 39/292 | /23 | E-   | E-   | 9 |
|    | 661                                                           |        | 328 | 26   | 24   |   |
|    | GO:                                                           |        | 126 | 9.86 | 5.87 | 2 |
| BP | 0071 granulocyte chemotaxis                                   | 27/292 | /23 | E-   | E-   | 7 |
|    | 621                                                           |        | 328 | 26   | 24   |   |
|    | GO:                                                           |        | 445 | 1.37 | 7.89 | 4 |
| BP | 0019 second-messenger-mediated signaling                      | 43/292 | /23 | E-   | E-   | 3 |
|    | 932                                                           |        | 328 | 25   | 24   |   |
|    | GO:                                                           |        | 231 | 3.11 | 1.74 | 3 |
| BP | 0002 myeloid leukocyte activation                             | 33/292 | /23 | E-   | E-   | 3 |
|    | 274                                                           |        | 328 | 25   | 23   |   |
|    | GO:                                                           |        | 317 | 5.33 | 2.89 | 3 |
| BP | 0046 lymphocyte proliferation                                 | 37/292 | /23 | E-   | E-   | 7 |
|    | 651                                                           |        | 328 | 25   | 23   |   |
|    | GO:                                                           |        | 438 | 7.10 | 3.75 | 4 |
| BP | 0050 epithelial cell proliferation                            | 42/292 | /23 | E-   | E-   | 2 |
|    | 673                                                           |        | 328 | 25   | 23   |   |

|    |                                                            |        |     |      |      |   |
|----|------------------------------------------------------------|--------|-----|------|------|---|
|    | GO:                                                        |        | 496 | 1.19 | 6.11 | 4 |
| BP | 0050 positive regulation of cell activation                | 44/292 | /23 | E-   | E-   | 4 |
|    | 867                                                        |        | 328 | 24   | 23   |   |
|    | GO:                                                        |        | 155 | 1.84 | 9.20 | 2 |
| BP | 0097 granulocyte migration                                 | 28/292 | /23 | E-   | E-   | 8 |
|    | 530                                                        |        | 328 | 24   | 23   |   |
|    | GO:                                                        |        | 99/ | 2.21 | 1.07 | 2 |
| BP | 0030 neutrophil chemotaxis                                 | 24/292 | 233 | E-   | E-   | 4 |
|    | 593                                                        |        | 28  | 24   | 22   |   |
|    | GO:                                                        |        | 479 | 2.63 | 1.25 | 4 |
| BP | 0002 positive regulation of leukocyte activation           | 43/292 | /23 | E-   | E-   | 3 |
|    | 696                                                        |        | 328 | 24   | 22   |   |
|    | GO:                                                        |        | 368 | 1.02 | 4.71 | 3 |
| BP | 0032 response to lipopolysaccharide                        | 38/292 | /23 | E-   | E-   | 8 |
|    | 496                                                        |        | 328 | 23   | 22   |   |
|    | GO:                                                        |        | 427 | 2.45 | 1.10 | 4 |
| BP | 0022 regulation of cell-cell adhesion                      | 40/292 | /23 | E-   | E-   | 0 |
|    | 407                                                        |        | 328 | 23   | 21   |   |
|    | GO:                                                        |        | 124 | 3.34 | 1.47 | 2 |
| BP | 1990 neutrophil migration                                  | 25/292 | /23 | E-   | E-   | 5 |
|    | 266                                                        |        | 328 | 23   | 21   |   |
|    | GO:                                                        |        | 140 | 4.10 | 1.76 | 2 |
| BP | 0032 positive regulation of mononuclear cell proliferation | 26/292 | /23 | E-   | E-   | 6 |
|    | 946                                                        |        | 328 | 23   | 21   |   |
|    | GO:                                                        |        | 372 | 1.53 | 6.41 | 3 |
| BP | 0050 regulation of epithelial cell proliferation           | 37/292 | /23 | E-   | E-   | 7 |
|    | 678                                                        |        | 328 | 22   | 21   |   |
|    | GO:                                                        |        | 427 | 2.27 | 9.30 | 3 |
| BP | 0001 ameboidal-type cell migration                         | 39/292 | /23 | E-   | E-   | 9 |
|    | 667                                                        |        | 328 | 22   | 21   |   |
|    | GO:                                                        |        | 152 | 3.75 | 1.50 | 2 |
| BP | 0070 positive regulation of leukocyte proliferation        | 26/292 | /23 | E-   | E-   | 6 |
|    | 665                                                        |        | 328 | 22   | 20   |   |
|    | GO:                                                        |        | 435 | 4.44 | 1.74 | 3 |
| BP | 0045 positive regulation of cell adhesion                  | 39/292 | /23 | E-   | E-   | 9 |
|    | 785                                                        |        | 328 | 22   | 20   |   |
|    | GO:                                                        |        | 138 | 5.50 | 2.11 | 2 |
| BP | 0050 positive regulation of lymphocyte proliferation       | 25/292 | /23 | E-   | E-   | 5 |
|    | 671                                                        |        | 328 | 22   | 20   |   |
|    | GO:                                                        |        | 156 | 7.50 | 2.82 | 2 |
| BP | 0002 positive regulation of leukocyte migration            | 26/292 | /23 | E-   | E-   | 6 |
|    | 687                                                        |        | 328 | 22   | 20   |   |



|    |                                                                            |        |     |      |      |   |
|----|----------------------------------------------------------------------------|--------|-----|------|------|---|
| BP | GO: 0002 regulation of production of molecular mediator of immune response | 26/292 | 159 | 1.24 | 4.59 | 2 |
|    | 700                                                                        |        | /23 | E-   | E-   | 6 |
|    |                                                                            |        | 328 | 21   | 20   |   |
|    | GO:                                                                        |        | 325 | 1.74 | 6.30 | 3 |
| BP | 0070 ERK1 and ERK2 cascade                                                 | 34/292 | /23 | E-   | E-   | 4 |
|    | 371                                                                        |        | 328 | 21   | 20   |   |
|    | GO:                                                                        |        | 286 | 3.63 | 1.29 | 3 |
| BP | 0009 response to virus                                                     | 32/292 | /23 | E-   | E-   | 2 |
|    | 615                                                                        |        | 328 | 21   | 19   |   |
|    | GO:                                                                        |        | 152 | 6.61 | 2.30 | 2 |
| BP | 0050 positive regulation of inflammatory response                          | 25/292 | /23 | E-   | E-   | 5 |
|    | 729                                                                        |        | 328 | 21   | 19   |   |
|    | GO:                                                                        |        | 364 | 6.97 | 2.38 | 3 |
| BP | 0046 hormone secretion                                                     | 35/292 | /23 | E-   | E-   | 5 |
|    | 879                                                                        |        | 328 | 21   | 19   |   |
|    | GO:                                                                        |        | 416 | 7.26 | 2.39 | 3 |
| BP | 0070 neuron death                                                          | 37/292 | /23 | E-   | E-   | 7 |
|    | 997                                                                        |        | 328 | 21   | 19   |   |
|    | GO:                                                                        |        | 170 | 7.27 | 2.39 | 2 |
| BP | 0048 smooth muscle cell proliferation                                      | 26/292 | /23 | E-   | E-   | 6 |
|    | 659                                                                        |        | 328 | 21   | 19   |   |
|    | GO:                                                                        |        | 107 | 9.41 | 3.05 | 2 |
| BP | 0002 cytokine production involved in immune response                       | 22/292 | /23 | E-   | E-   | 2 |
|    | 367                                                                        |        | 328 | 21   | 19   |   |
|    | GO:                                                                        |        | 372 | 1.42 | 4.52 | 3 |
| BP | 0009 hormone transport                                                     | 35/292 | /23 | E-   | E-   | 5 |
|    | 914                                                                        |        | 328 | 20   | 19   |   |
|    | GO:                                                                        |        | 60/ | 1.94 | 6.06 | 1 |
| BP | 0070 chemokine-mediated signaling pathway                                  | 18/292 | 233 | E-   | E-   | 8 |
|    | 098                                                                        |        | 28  | 20   | 19   |   |
|    | GO:                                                                        |        | 196 | 2.13 | 6.54 | 2 |
| BP | 0097 receptor signaling pathway via STAT                                   | 27/292 | /23 | E-   | E-   | 7 |
|    | 696                                                                        |        | 328 | 20   | 19   |   |
|    | GO:                                                                        |        | 217 | 2.50 | 7.55 | 2 |
| BP | 0002 regulation of leukocyte migration                                     | 28/292 | /23 | E-   | E-   | 8 |
|    | 685                                                                        |        | 328 | 20   | 19   |   |
|    | GO:                                                                        |        | 128 | 3.11 | 9.26 | 2 |
| BP | 0032 interferon-gamma production                                           | 23/292 | /23 | E-   | E-   | 3 |
|    | 609                                                                        |        | 328 | 20   | 19   |   |
|    | GO:                                                                        |        | 308 | 3.49 | 1.02 | 3 |
| BP | 0070 regulation of ERK1 and ERK2 cascade                                   | 32/292 | /23 | E-   | E-   | 2 |
|    | 372                                                                        |        | 328 | 20   | 18   |   |

|    |                                                   |        |     |      |      |   |
|----|---------------------------------------------------|--------|-----|------|------|---|
|    | GO:                                               |        | 492 | 3.60 | 1.04 | 3 |
| BP | 0009 response to wounding                         | 39/292 | /23 | E-   | E-   | 9 |
|    | 611                                               |        | 328 | 20   | 18   |   |
|    | GO:                                               |        | 114 | 4.09 | 1.16 | 2 |
| BP | 0032 regulation of interferon-gamma production    | 22/292 | /23 | E-   | E-   | 2 |
|    | 649                                               |        | 328 | 20   | 18   |   |
|    | GO:                                               |        | 265 | 4.74 | 1.32 | 3 |
| BP | 0022 positive regulation of cell-cell adhesion    | 30/292 | /23 | E-   | E-   | 0 |
|    | 409                                               |        | 328 | 20   | 18   |   |
|    | GO:                                               |        | 191 | 1.50 | 4.13 | 2 |
| BP | 0007 receptor signaling pathway via JAK-STAT      | 26/292 | /23 | E-   | E-   | 6 |
|    | 259                                               |        | 328 | 19   | 18   |   |
|    | GO:                                               |        | 121 | 1.60 | 4.35 | 2 |
| BP | 0002 regulation of leukocyte chemotaxis           | 22/292 | /23 | E-   | E-   | 2 |
|    | 688                                               |        | 328 | 19   | 18   |   |
|    | GO:                                               |        | 213 | 1.95 | 5.13 | 2 |
| BP | 0002 regulation of adaptive immune response       | 27/292 | /23 | E-   | E-   | 7 |
|    | 819                                               |        | 328 | 19   | 18   |   |
|    | GO:                                               |        | 213 | 1.95 | 5.13 | 2 |
| BP | 0042 T cell proliferation                         | 27/292 | /23 | E-   | E-   | 7 |
|    | 098                                               |        | 328 | 19   | 18   |   |
|    | GO:                                               |        | 377 | 1.98 | 5.14 | 3 |
| BP | 1901 regulation of neuron death                   | 34/292 | /23 | E-   | E-   | 4 |
|    | 214                                               |        | 328 | 19   | 18   |   |
|    | GO:                                               |        | 303 | 2.19 | 5.60 | 3 |
| BP | 0046 regulation of hormone secretion              | 31/292 | /23 | E-   | E-   | 1 |
|    | 883                                               |        | 328 | 19   | 18   |   |
|    | GO:                                               |        | 236 | 2.47 | 6.25 | 2 |
| BP | 0033 muscle cell proliferation                    | 28/292 | /23 | E-   | E-   | 8 |
|    | 002                                               |        | 328 | 19   | 18   |   |
|    | GO:                                               |        | 216 | 2.82 | 7.03 | 2 |
| BP | 0070 positive regulation of ERK1 and ERK2 cascade | 27/292 | /23 | E-   | E-   | 7 |
|    | 374                                               |        | 328 | 19   | 18   |   |
|    | GO:                                               |        | 309 | 3.88 | 9.54 | 3 |
| BP | 1903 regulation of leukocyte cell-cell adhesion   | 31/292 | /23 | E-   | E-   | 1 |
|    | 037                                               |        | 328 | 19   | 18   |   |
|    | GO:                                               |        | 96/ | 4.27 | 1.02 | 2 |
| BP | 0002 positive regulation of leukocyte chemotaxis  | 20/292 | 233 | E-   | E-   | 0 |
|    | 690                                               |        | 28  | 19   | 17   |   |
|    | GO:                                               |        | 70/ | 4.35 | 1.02 | 1 |
| BP | 1990 response to chemokine                        | 18/292 | 233 | E-   | E-   | 8 |
|    | 868                                               |        | 28  | 19   | 17   |   |

|    |                                                          |                                                                                                                           |     |      |      |  |   |
|----|----------------------------------------------------------|---------------------------------------------------------------------------------------------------------------------------|-----|------|------|--|---|
|    | GO:                                                      |                                                                                                                           | 70/ | 4.35 | 1.02 |  | 1 |
| BP | 1990 cellular response to chemokine                      | 18/292                                                                                                                    | 233 | E-   | E-   |  | 8 |
|    | 869                                                      |                                                                                                                           | 28  | 19   | 17   |  |   |
|    | GO:                                                      |                                                                                                                           | 241 | 4.36 | 1.02 |  | 2 |
| BP | 0001 morphogenesis of a branching structure              | 28/292                                                                                                                    | /23 | E-   | E-   |  | 8 |
|    | 763                                                      |                                                                                                                           | 328 | 19   | 17   |  |   |
|    | GO:                                                      |                                                                                                                           | 361 | 4.59 | 1.06 |  | 3 |
| BP | 0002 production of molecular mediator of immune response | 33/292                                                                                                                    | /23 | E-   | E-   |  | 3 |
|    | 440                                                      |                                                                                                                           | 328 | 19   | 17   |  |   |
|    | GO:                                                      |                                                                                                                           | 388 | 4.88 | 1.11 |  | 3 |
| BP | 1903 positive regulation of secretion by cell            | 34/292                                                                                                                    | /23 | E-   | E-   |  | 4 |
|    | 532                                                      |                                                                                                                           | 328 | 19   | 17   |  |   |
|    | GO:                                                      | adaptive immune response based on somatic recombination of immune receptors built from immunoglobulin superfamily domains | 445 | 5.76 | 1.29 |  | 3 |
| BP | 0002                                                     | 36/292                                                                                                                    | /23 | E-   | E-   |  | 6 |
|    | 460                                                      |                                                                                                                           | 328 | 19   | 17   |  |   |
|    | GO:                                                      |                                                                                                                           | 222 | 5.80 | 1.29 |  | 2 |
| BP | 0061 morphogenesis of a branching epithelium             | 27/292                                                                                                                    | /23 | E-   | E-   |  | 7 |
|    | 138                                                      |                                                                                                                           | 328 | 19   | 17   |  |   |
|    | GO:                                                      |                                                                                                                           | 291 | 6.90 | 1.52 |  | 3 |
| BP | 0002 regulation of response to biotic stimulus           | 30/292                                                                                                                    | /23 | E-   | E-   |  | 0 |
|    | 831                                                      |                                                                                                                           | 328 | 19   | 17   |  |   |
|    | GO:                                                      |                                                                                                                           | 165 | 8.05 | 1.75 |  | 2 |
| BP | 0048 regulation of smooth muscle cell proliferation      | 24/292                                                                                                                    | /23 | E-   | E-   |  | 4 |
|    | 660                                                      |                                                                                                                           | 328 | 19   | 17   |  |   |
|    | GO:                                                      |                                                                                                                           | 275 | 1.46 | 3.13 |  | 2 |
| BP | 0060 developmental growth involved in morphogenesis      | 29/292                                                                                                                    | /23 | E-   | E-   |  | 9 |
|    | 560                                                      |                                                                                                                           | 328 | 18   | 17   |  |   |
|    | GO:                                                      |                                                                                                                           | 210 | 1.69 | 3.59 |  | 2 |
| BP | 2000 regulation of animal organ morphogenesis            | 26/292                                                                                                                    | /23 | E-   | E-   |  | 6 |
|    | 027                                                      |                                                                                                                           | 328 | 18   | 17   |  |   |
|    | GO:                                                      |                                                                                                                           | 440 | 3.13 | 6.56 |  | 3 |
| BP | 0051 positive regulation of secretion                    | 35/292                                                                                                                    | /23 | E-   | E-   |  | 5 |
|    | 047                                                      |                                                                                                                           | 328 | 18   | 17   |  |   |
|    | GO:                                                      |                                                                                                                           | 175 | 3.28 | 6.81 |  | 2 |
| BP | 0042 regulation of T cell proliferation                  | 24/292                                                                                                                    | /23 | E-   | E-   |  | 4 |
|    | 129                                                      |                                                                                                                           | 328 | 18   | 17   |  |   |
|    | GO:                                                      |                                                                                                                           | 260 | 3.35 | 6.86 |  | 2 |
| BP | 0001 negative regulation of cytokine production          | 28/292                                                                                                                    | /23 | E-   | E-   |  | 8 |
|    | 818                                                      |                                                                                                                           | 328 | 18   | 17   |  |   |
|    | GO:                                                      |                                                                                                                           | 106 | 3.43 | 6.96 |  | 2 |
| BP | 0110 positive regulation of animal organ morphogenesis   | 20/292                                                                                                                    | /23 | E-   | E-   |  | 0 |
|    | 110                                                      |                                                                                                                           | 328 | 18   | 17   |  |   |

|    |      |                                                                                                                                         |        |      |      |    |  |  |   |
|----|------|-----------------------------------------------------------------------------------------------------------------------------------------|--------|------|------|----|--|--|---|
|    | GO:  |                                                                                                                                         | 239    | 3.98 | 7.97 |    |  |  |   |
| BP | 0051 | defense response to virus                                                                                                               | 27/292 | /23  | E-   | E- |  |  | 2 |
|    | 607  |                                                                                                                                         |        | 328  | 18   | 17 |  |  | 7 |
|    | GO:  |                                                                                                                                         | 107    | 4.18 | 8.29 |    |  |  | 2 |
| BP | 1904 | positive regulation of receptor signaling                                                                                               | 20/292 | /23  | E-   | E- |  |  | 0 |
|    | 894  | pathway via STAT                                                                                                                        |        | 328  | 18   | 17 |  |  |   |
|    | GO:  |                                                                                                                                         | 197    | 4.32 | 8.47 |    |  |  | 2 |
| BP | 0002 | regulation of adaptive immune response based on somatic recombination of immune receptors built from immunoglobulin superfamily domains | 25/292 | /23  | E-   | E- |  |  | 5 |
|    | 822  |                                                                                                                                         |        | 328  | 18   | 17 |  |  |   |
|    | GO:  |                                                                                                                                         | 242    | 5.49 | 1.07 |    |  |  | 2 |
| BP | 0032 | activation of protein kinase activity                                                                                                   | 27/292 | /23  | E-   | E- |  |  | 7 |
|    | 147  |                                                                                                                                         |        | 328  | 18   | 16 |  |  |   |
|    | GO:  |                                                                                                                                         | 221    | 6.15 | 1.18 |    |  |  | 2 |
| BP | 1903 | positive regulation of leukocyte cell-cell adhesion                                                                                     | 26/292 | /23  | E-   | E- |  |  | 6 |
|    | 039  |                                                                                                                                         |        | 328  | 18   | 16 |  |  |   |
|    | GO:  |                                                                                                                                         | 424    | 7.65 | 1.45 |    |  |  | 3 |
| BP | 1903 | regulation of hemopoiesis                                                                                                               | 34/292 | /23  | E-   | E- |  |  | 4 |
|    | 706  |                                                                                                                                         |        | 328  | 18   | 16 |  |  |   |
|    | GO:  |                                                                                                                                         | 224    | 8.62 | 1.62 |    |  |  | 2 |
| BP | 1903 | positive regulation of hemopoiesis                                                                                                      | 26/292 | /23  | E-   | E- |  |  | 6 |
|    | 708  |                                                                                                                                         |        | 328  | 18   | 16 |  |  |   |
|    | GO:  |                                                                                                                                         | 345    | 9.40 | 1.75 |    |  |  | 3 |
| BP | 0007 | leukocyte cell-cell adhesion                                                                                                            | 31/292 | /23  | E-   | E- |  |  | 1 |
|    | 159  |                                                                                                                                         |        | 328  | 18   | 16 |  |  |   |
|    | GO:  |                                                                                                                                         | 295    | 9.97 | 1.83 |    |  |  | 2 |
| BP | 0071 | cellular response to molecule of bacterial origin                                                                                       | 29/292 | /23  | E-   | E- |  |  | 9 |
|    | 219  |                                                                                                                                         |        | 328  | 18   | 16 |  |  |   |
|    | GO:  |                                                                                                                                         | 320    | 1.00 | 1.83 |    |  |  | 3 |
| BP | 0071 | cellular response to biotic stimulus                                                                                                    | 30/292 | /23  | E-   | E- |  |  | 0 |
|    | 216  |                                                                                                                                         |        | 328  | 17   | 16 |  |  |   |
|    | GO:  |                                                                                                                                         | 321    | 1.09 | 1.98 |    |  |  | 3 |
| BP | 0050 | regulation of T cell activation                                                                                                         | 30/292 | /23  | E-   | E- |  |  | 0 |
|    | 863  |                                                                                                                                         |        | 328  | 17   | 16 |  |  |   |
|    | GO:  |                                                                                                                                         | 273    | 1.22 | 2.19 |    |  |  | 2 |
| BP | 0002 | positive regulation of immune effector process                                                                                          | 28/292 | /23  | E-   | E- |  |  | 8 |
|    | 699  |                                                                                                                                         |        | 328  | 17   | 16 |  |  |   |
|    | GO:  |                                                                                                                                         | 85/    | 1.91 | 3.39 |    |  |  | 1 |
| BP | 0002 | regulation of cytokine production involved in immune response                                                                           | 18/292 | 233  | E-   | E- |  |  | 8 |
|    | 718  |                                                                                                                                         |        | 28   | 17   | 16 |  |  |   |
|    | GO:  |                                                                                                                                         | 73/    | 2.68 | 4.72 |    |  |  | 1 |
| BP | 0014 | positive regulation of phosphatidylinositol 3-kinase signaling                                                                          | 17/292 | 233  | E-   | E- |  |  | 7 |
|    | 068  |                                                                                                                                         |        | 28   | 17   | 16 |  |  |   |

|    |      |                                              |        |      |      |    |   |
|----|------|----------------------------------------------|--------|------|------|----|---|
|    | GO:  |                                              | 214    | 3.23 | 5.62 |    | 2 |
| BP | 0019 | calcium-mediated signaling                   | 25/292 | /23  | E-   | E- | 5 |
|    | 722  |                                              |        | 328  | 17   | 16 |   |
|    | GO:  |                                              | 173    | 3.41 | 5.89 |    | 2 |
| BP | 1904 | regulation of receptor signaling pathway via | 23/292 | /23  | E-   | E- | 3 |
|    | 892  | STAT                                         |        | 328  | 17   | 16 |   |
|    | GO:  |                                              | 154    | 3.53 | 6.04 |    | 2 |
| BP | 0022 | gland morphogenesis                          | 22/292 | /23  | E-   | E- | 2 |
|    | 612  |                                              |        | 328  | 17   | 16 |   |
|    | GO:  |                                              | 103    | 3.78 | 6.38 |    | 1 |
| BP | 0046 | positive regulation of receptor signaling    | 19/292 | /23  | E-   | E- | 9 |
|    | 427  | pathway via JAK-STAT                         |        | 328  | 17   | 16 |   |
|    | GO:  |                                              | 285    | 3.81 | 6.38 |    | 2 |
| BP | 0071 | cellular response to lipopolysaccharide      | 28/292 | /23  | E-   | E- | 8 |
|    | 222  |                                              |        | 328  | 17   | 16 |   |
|    | GO:  |                                              | 89/    | 4.59 | 7.63 |    | 1 |
| BP | 0071 | mononuclear cell migration                   | 18/292 | 233  | E-   | E- | 8 |
|    | 674  |                                              |        | 28   | 17   | 16 |   |
|    | GO:  |                                              | 225    | 1.08 | 1.77 |    | 2 |
| BP | 0048 | mesenchymal cell differentiation             | 25/292 | /23  | E-   | E- | 5 |
|    | 762  |                                              |        | 328  | 16   | 15 |   |
|    | GO:  |                                              | 109    | 1.15 | 1.88 |    | 1 |
| BP | 0002 | positive regulation of production of         | 19/292 | /23  | E-   | E- | 9 |
|    | 702  | molecular mediator of immune response        |        | 328  | 16   | 15 |   |
|    | GO:  |                                              | 110    | 1.38 | 2.23 |    | 1 |
| BP | 0002 | acute inflammatory response                  | 19/292 | /23  | E-   | E- | 9 |
|    | 526  |                                              |        | 328  | 16   | 15 |   |
|    | GO:  |                                              | 44/    | 1.39 | 2.24 |    | 1 |
| BP | 0050 | negative chemotaxis                          | 14/292 | 233  | E-   | E- | 4 |
|    | 919  |                                              |        | 28   | 16   | 15 |   |
|    | GO:  |                                              | 326    | 1.48 | 2.33 |    | 2 |
| BP | 0040 | negative regulation of locomotion            | 29/292 | /23  | E-   | E- | 9 |
|    | 013  |                                              |        | 328  | 16   | 15 |   |
|    | GO:  |                                              | 326    | 1.48 | 2.33 |    | 2 |
| BP | 0051 | negative regulation of cellular component    | 29/292 | /23  | E-   | E- | 9 |
|    | 271  | movement                                     |        | 328  | 16   | 15 |   |
|    | GO:  |                                              | 208    | 1.89 | 2.95 |    | 2 |
| BP | 0050 | positive regulation of epithelial cell       | 24/292 | /23  | E-   | E- | 4 |
|    | 679  | proliferation                                |        | 328  | 16   | 15 |   |
|    | GO:  |                                              | 129    | 1.93 | 3.00 |    | 2 |
| BP | 0061 | antimicrobial humoral immune response        | 20/292 | /23  | E-   | E- | 0 |
|    | 844  | mediated by antimicrobial peptide            |        | 328  | 16   | 15 |   |

|    |      |                                                        |        |      |      |    |   |
|----|------|--------------------------------------------------------|--------|------|------|----|---|
|    | GO:  |                                                        | 168    | 2.35 | 3.61 |    |   |
| BP | 0046 | regulation of receptor signaling pathway via JAK-STAT  | 22/292 | /23  | E-   | E- | 2 |
|    | 425  |                                                        |        | 328  | 16   | 15 | 2 |
|    | GO:  |                                                        | 416    | 2.50 | 3.81 |    |   |
| BP | 0051 | positive regulation of lymphocyte activation           | 32/292 | /23  | E-   | E- | 3 |
|    | 251  |                                                        |        | 328  | 16   | 15 | 2 |
|    | GO:  |                                                        | 100    | 4.11 | 6.21 |    |   |
| BP | 0042 | macrophage activation                                  | 18/292 | /23  | E-   | E- | 1 |
|    | 116  |                                                        |        | 328  | 16   | 15 | 8 |
|    | GO:  |                                                        | 71/    | 4.15 | 6.23 |    |   |
| BP | 0042 | regulation of tyrosine phosphorylation of STAT protein | 16/292 | 233  | E-   | E- | 1 |
|    | 509  |                                                        |        | 28   | 16   | 15 | 6 |
|    | GO:  |                                                        | 270    | 8.67 | 1.29 |    |   |
| BP | 0043 | regulation of neuron apoptotic process                 | 26/292 | /23  | E-   | E- | 2 |
|    | 523  |                                                        |        | 328  | 16   | 14 | 6 |
|    | GO:  |                                                        | 349    | 9.01 | 1.33 |    |   |
| BP | 0042 | wound healing                                          | 29/292 | /23  | E-   | E- | 2 |
|    | 060  |                                                        |        | 328  | 16   | 14 | 9 |
|    | GO:  |                                                        | 75/    | 1.06 | 1.55 |    |   |
| BP | 0007 | tyrosine phosphorylation of STAT protein               | 16/292 | 233  | E-   | E- | 1 |
|    | 260  |                                                        |        | 28   | 15   | 14 | 6 |
|    | GO:  |                                                        | 409    | 1.13 | 1.65 |    |   |
| BP | 0048 | regulation of developmental growth                     | 31/292 | /23  | E-   | E- | 3 |
|    | 638  |                                                        |        | 328  | 15   | 14 | 1 |
|    | GO:  |                                                        | 181    | 1.17 | 1.68 |    |   |
| BP | 0001 | temperature homeostasis                                | 22/292 | /23  | E-   | E- | 2 |
|    | 659  |                                                        |        | 328  | 15   | 14 | 2 |
|    | GO:  |                                                        | 226    | 1.27 | 1.81 |    |   |
| BP | 0043 | positive regulation of MAP kinase activity             | 24/292 | /23  | E-   | E- | 2 |
|    | 406  |                                                        |        | 328  | 15   | 14 | 4 |
|    | GO:  |                                                        | 251    | 1.44 | 2.04 |    |   |
| BP | 1901 | negative regulation of neuron death                    | 25/292 | /23  | E-   | E- | 2 |
|    | 215  |                                                        |        | 328  | 15   | 14 | 5 |
|    | GO:  |                                                        | 228    | 1.55 | 2.18 |    |   |
| BP | 0031 | negative regulation of defense response                | 24/292 | /23  | E-   | E- | 2 |
|    | 348  |                                                        |        | 328  | 15   | 14 | 4 |
|    | GO:  |                                                        | 109    | 2.02 | 2.82 |    |   |
| BP | 0051 | positive regulation of protein kinase B signaling      | 18/292 | /23  | E-   | E- | 1 |
|    | 897  |                                                        |        | 328  | 15   | 14 | 8 |
|    | GO:  |                                                        | 165    | 2.06 | 2.86 |    |   |
| BP | 0019 | antimicrobial humoral response                         | 21/292 | /23  | E-   | E- | 2 |
|    | 730  |                                                        |        | 328  | 15   | 14 | 1 |

|    |                                                                       |        |     |      |      |   |
|----|-----------------------------------------------------------------------|--------|-----|------|------|---|
|    | GO:                                                                   |        | 281 | 2.28 | 3.13 |   |
| BP | 0060 mesenchyme development                                           | 26/292 | /23 | E-   | E-   | 2 |
|    | 485                                                                   |        | 328 | 15   | 14   | 6 |
|    | GO:                                                                   |        | 146 | 2.30 | 3.13 | 2 |
| BP | 0019 sensory perception of pain                                       | 20/292 | /23 | E-   | E-   | 0 |
|    | 233                                                                   |        | 328 | 15   | 14   |   |
|    | GO:                                                                   |        | 334 | 2.31 | 3.13 | 2 |
| BP | 0043 positive regulation of ion transport                             | 28/292 | /23 | E-   | E-   | 8 |
|    | 270                                                                   |        | 328 | 15   | 14   |   |
|    | GO:                                                                   |        | 188 | 2.62 | 3.53 | 2 |
| BP | 0045 positive regulation of angiogenesis                              | 22/292 | /23 | E-   | E-   | 2 |
|    | 766                                                                   |        | 328 | 15   | 14   |   |
|    | GO:                                                                   |        | 167 | 2.64 | 3.53 | 2 |
| BP | 0032 interleukin-6 production                                         | 21/292 | /23 | E-   | E-   | 1 |
|    | 635                                                                   |        | 328 | 15   | 14   |   |
|    | GO:                                                                   |        | 80/ | 3.16 | 4.20 | 1 |
| BP | 0032 positive regulation of interferon-gamma production               | 16/292 | 233 | E-   | E-   | 6 |
|    | 729                                                                   |        | 28  | 15   | 14   |   |
|    | GO:                                                                   |        | 261 | 3.59 | 4.73 | 2 |
| BP | 0002 regulation of leukocyte mediated immunity                        | 25/292 | /23 | E-   | E-   | 5 |
|    | 703                                                                   |        | 328 | 15   | 14   |   |
|    | GO:                                                                   |        | 427 | 3.72 | 4.86 | 3 |
| BP | 0010 regulation of metal ion transport                                | 31/292 | /23 | E-   | E-   | 1 |
|    | 959                                                                   |        | 328 | 15   | 14   |   |
|    | GO:                                                                   |        | 81/ | 3.90 | 5.06 | 1 |
| BP | 0071 cellular response to interleukin-1                               | 16/292 | 233 | E-   | E-   | 6 |
|    | 347                                                                   |        | 28  | 15   | 14   |   |
|    | GO:                                                                   |        | 400 | 4.46 | 5.75 | 3 |
| BP | 1901 response to peptide                                              | 30/292 | /23 | E-   | E-   | 0 |
|    | 652                                                                   |        | 328 | 15   | 14   |   |
|    | GO:                                                                   |        | 114 | 4.59 | 5.88 | 1 |
| BP | 2000 positive regulation of reactive oxygen species metabolic process | 18/292 | /23 | E-   | E-   | 8 |
|    | 379                                                                   |        | 328 | 15   | 14   |   |
|    | GO:                                                                   |        | 462 | 4.89 | 6.22 | 3 |
| BP | 0002 negative regulation of immune system process                     | 32/292 | /23 | E-   | E-   | 2 |
|    | 683                                                                   |        | 328 | 15   | 14   |   |
|    | GO:                                                                   |        | 291 | 5.28 | 6.67 | 2 |
| BP | 0071 positive regulation of protein serine/threonine kinase activity  | 26/292 | /23 | E-   | E-   | 6 |
|    | 902                                                                   |        | 328 | 15   | 14   |   |
|    | GO:                                                                   |        | 134 | 6.10 | 7.65 | 1 |
| BP | 0001 regulation of endothelial cell proliferation                     | 19/292 | /23 | E-   | E-   | 9 |
|    | 936                                                                   |        | 328 | 15   | 14   |   |

|    |                 |                                                       |        |                    |                  |                  |        |
|----|-----------------|-------------------------------------------------------|--------|--------------------|------------------|------------------|--------|
| BP | GO: 0014<br>066 | regulation of phosphatidylinositol 3-kinase signaling | 17/292 | 99/<br>233<br>28   | 6.26<br>E-<br>15 | 7.81<br>E-<br>14 | 1<br>7 |
| BP | GO: 0002<br>821 | positive regulation of adaptive immune response       | 20/292 | 154/<br>/23<br>328 | 6.57<br>E-<br>15 | 8.14<br>E-<br>14 | 2<br>0 |
| BP | GO: 0001<br>558 | regulation of cell growth                             | 31/292 | 438/<br>/23<br>328 | 7.45<br>E-<br>15 | 9.17<br>E-<br>14 | 3<br>1 |
| BP | GO: 0150<br>076 | neuroinflammatory response                            | 15/292 | 70/<br>233<br>28   | 7.88<br>E-<br>15 | 9.63<br>E-<br>14 | 1<br>5 |
| BP | GO: 0050<br>728 | negative regulation of inflammatory response          | 20/292 | 156/<br>/23<br>328 | 8.47<br>E-<br>15 | 1.03<br>E-<br>13 | 2<br>0 |
| BP | GO: 0051<br>402 | neuron apoptotic process                              | 26/292 | 298/<br>/23<br>328 | 9.31<br>E-<br>15 | 1.12<br>E-<br>13 | 2<br>6 |
| BP | GO: 0051<br>048 | negative regulation of secretion                      | 23/292 | 223/<br>/23<br>328 | 9.58<br>E-<br>15 | 1.15<br>E-<br>13 | 2<br>3 |
| BP | GO: 0050<br>870 | positive regulation of T cell activation              | 22/292 | 200/<br>/23<br>328 | 9.67<br>E-<br>15 | 1.15<br>E-<br>13 | 2<br>2 |
| BP | GO: 1901<br>343 | negative regulation of vasculature development        | 19/292 | 139/<br>/23<br>328 | 1.22<br>E-<br>14 | 1.44<br>E-<br>13 | 1<br>9 |
| BP | GO: 0072<br>676 | lymphocyte migration                                  | 17/292 | 103/<br>/23<br>328 | 1.25<br>E-<br>14 | 1.47<br>E-<br>13 | 1<br>7 |
| BP | GO: 0060<br>562 | epithelial tube morphogenesis                         | 29/292 | 387/<br>/23<br>328 | 1.34<br>E-<br>14 | 1.56<br>E-<br>13 | 2<br>9 |
| BP | GO: 0042<br>088 | T-helper 1 type immune response                       | 13/292 | 47/<br>233<br>28   | 1.36<br>E-<br>14 | 1.58<br>E-<br>13 | 1<br>3 |
| BP | GO: 0050<br>886 | endocrine process                                     | 17/292 | 104/<br>/23<br>328 | 1.47<br>E-<br>14 | 1.70<br>E-<br>13 | 1<br>7 |
| BP | GO: 0001<br>503 | ossification                                          | 29/292 | 394/<br>/23<br>328 | 2.12<br>E-<br>14 | 2.43<br>E-<br>13 | 2<br>9 |





|    |                                                                      |        |     |      |      |   |
|----|----------------------------------------------------------------------|--------|-----|------|------|---|
|    | GO:                                                                  |        | 471 | 5.32 | 5.57 | 3 |
| BP | 0048 gland development                                               | 31/292 | /23 | E-   | E-   | 1 |
|    | 732                                                                  |        | 328 | 14   | 13   |   |
|    | GO:                                                                  |        | 409 | 5.52 | 5.76 | 2 |
| BP | 0030 lymphocyte differentiation                                      | 29/292 | /23 | E-   | E-   | 9 |
|    | 098                                                                  |        | 328 | 14   | 13   |   |
|    | GO:                                                                  |        | 295 | 6.04 | 6.27 | 2 |
| BP | 0010 epithelial cell migration                                       | 25/292 | /23 | E-   | E-   | 5 |
|    | 631                                                                  |        | 328 | 14   | 13   |   |
|    | GO:                                                                  |        | 113 | 6.13 | 6.32 | 1 |
| BP | 0030 regulation of axon extension                                    | 17/292 | /23 | E-   | E-   | 7 |
|    | 516                                                                  |        | 328 | 14   | 13   |   |
|    | GO:                                                                  |        | 96/ | 6.49 | 6.65 | 1 |
| BP | 0070 response to interleukin-1                                       | 16/292 | 233 | E-   | E-   | 6 |
|    | 555                                                                  |        | 28  | 14   | 13   |   |
|    | GO:                                                                  |        | 196 | 6.74 | 6.87 | 2 |
| BP | 0043 protein kinase B signaling                                      | 21/292 | /23 | E-   | E-   | 1 |
|    | 491                                                                  |        | 328 | 14   | 13   |   |
|    | GO:                                                                  |        | 297 | 7.05 | 7.15 | 2 |
| BP | 0090 epithelium migration                                            | 25/292 | /23 | E-   | E-   | 5 |
|    | 132                                                                  |        | 328 | 14   | 13   |   |
|    | GO:                                                                  |        | 53/ | 7.63 | 7.69 | 1 |
| BP | 0048 lymphocyte chemotaxis                                           | 13/292 | 233 | E-   | E-   | 3 |
|    | 247                                                                  |        | 28  | 14   | 13   |   |
|    | GO:                                                                  |        | 415 | 8.00 | 8.03 | 2 |
| BP | 0051 regulation of DNA-binding transcription factor activity         | 29/292 | /23 | E-   | E-   | 9 |
|    | 090                                                                  |        | 328 | 14   | 13   |   |
|    | GO:                                                                  |        | 299 | 8.21 | 8.19 | 2 |
| BP | 0090 tissue migration                                                | 25/292 | /23 | E-   | E-   | 5 |
|    | 130                                                                  |        | 328 | 14   | 13   |   |
|    | GO:                                                                  |        | 301 | 9.55 | 9.48 | 2 |
| BP | 0043 regulation of MAP kinase activity                               | 25/292 | /23 | E-   | E-   | 5 |
|    | 405                                                                  |        | 328 | 14   | 13   |   |
|    | GO:                                                                  |        | 224 | 1.02 | 1.01 | 2 |
| BP | 0003 vascular process in circulatory system                          | 22/292 | /23 | E-   | E-   | 2 |
|    | 018                                                                  |        | 328 | 13   | 12   |   |
|    | GO:                                                                  |        | 100 | 1.26 | 1.24 | 1 |
| BP | 0042 positive regulation of T cell proliferation                     | 16/292 | /23 | E-   | E-   | 6 |
|    | 102                                                                  |        | 328 | 13   | 12   |   |
|    | GO:                                                                  |        | 55/ | 1.29 | 1.25 | 1 |
| BP | 0042 positive regulation of tyrosine phosphorylation of STAT protein | 13/292 | 233 | E-   | E-   | 3 |
|    | 531                                                                  |        | 28  | 13   | 12   |   |

|    |                                                 |        |     |      |      |  |   |
|----|-------------------------------------------------|--------|-----|------|------|--|---|
|    | GO:                                             |        | 55/ | 1.29 | 1.25 |  | 1 |
| BP | 0050 negative regulation of chemotaxis          | 13/292 | 233 | E-   | E-   |  | 3 |
|    | 922                                             |        | 28  | 13   | 12   |  |   |
|    | GO:                                             |        | 33/ | 1.48 | 1.43 |  | 1 |
| BP | 0048 regulation of axon extension involved in   | 11/292 | 233 | E-   | E-   |  | 1 |
|    | 841 axon guidance                               |        | 28  | 13   | 12   |  |   |
|    | GO:                                             |        | 56/ | 1.66 | 1.59 |  | 1 |
| BP | 0061 glial cell activation                      | 13/292 | 233 | E-   | E-   |  | 3 |
|    | 900                                             |        | 28  | 13   | 12   |  |   |
|    | GO:                                             |        | 309 | 1.73 | 1.65 |  | 2 |
| BP | 1902 regulation of leukocyte differentiation    | 25/292 | /23 | E-   | E-   |  | 5 |
|    | 105                                             |        | 328 | 13   | 12   |  |   |
|    | GO:                                             |        | 207 | 1.99 | 1.90 |  | 2 |
| BP | 2000 regulation of reactive oxygen species      | 21/292 | /23 | E-   | E-   |  | 1 |
|    | 377 metabolic process                           |        | 328 | 13   | 12   |  |   |
|    | GO:                                             |        | 57/ | 2.12 | 2.01 |  | 1 |
| BP | 0002 monocyte chemotaxis                        | 13/292 | 233 | E-   | E-   |  | 3 |
|    | 548                                             |        | 28  | 13   | 12   |  |   |
|    | GO:                                             |        | 185 | 2.28 | 2.13 |  | 2 |
| BP | 0031 regulation of nervous system process       | 20/292 | /23 | E-   | E-   |  | 0 |
|    | 644                                             |        | 328 | 13   | 12   |  |   |
|    | GO:                                             |        | 185 | 2.28 | 2.13 |  | 2 |
| BP | 0048 branching morphogenesis of an epithelial   | 20/292 | /23 | E-   | E-   |  | 0 |
|    | 754 tube                                        |        | 328 | 13   | 12   |  |   |
|    | GO:                                             |        | 45/ | 2.35 | 2.19 |  | 1 |
| BP | 0071 semaphorin-plexin signaling pathway        | 12/292 | 233 | E-   | E-   |  | 2 |
|    | 526                                             |        | 28  | 13   | 12   |  |   |
|    | GO:                                             |        | 209 | 2.41 | 2.24 |  | 2 |
| BP | 0008 regulation of blood pressure               | 21/292 | /23 | E-   | E-   |  | 1 |
|    | 217                                             |        | 328 | 13   | 12   |  |   |
|    | GO:                                             |        | 58/ | 2.70 | 2.50 |  | 1 |
| BP | 0032 regulation of interleukin-10 production    | 13/292 | 233 | E-   | E-   |  | 3 |
|    | 653                                             |        | 28  | 13   | 12   |  |   |
|    | GO:                                             |        | 235 | 2.73 | 2.51 |  | 2 |
| BP | 0010 regulation of epithelial cell migration    | 22/292 | /23 | E-   | E-   |  | 2 |
|    | 632                                             |        | 328 | 13   | 12   |  |   |
|    | GO:                                             |        | 470 | 3.07 | 2.81 |  | 3 |
| BP | 0009 protein secretion                          | 30/292 | /23 | E-   | E-   |  | 0 |
|    | 306                                             |        | 328 | 13   | 12   |  |   |
|    | GO:                                             |        | 106 | 3.23 | 2.92 |  | 1 |
| BP | 0035 CD4-positive, alpha-beta T cell activation | 16/292 | /23 | E-   | E-   |  | 6 |
|    | 710                                             |        | 328 | 13   | 12   |  |   |

|    |      |                                                                           |        |      |      |    |   |
|----|------|---------------------------------------------------------------------------|--------|------|------|----|---|
|    | GO:  |                                                                           | 471    | 3.25 | 2.92 |    |   |
| BP | 0035 | establishment of protein localization to extracellular region             | 30/292 | /23  | E-   | E- | 3 |
|    | 592  |                                                                           |        | 328  | 13   | 12 | 0 |
|    | GO:  |                                                                           | 166    | 3.26 | 2.92 |    |   |
| BP | 0046 | alpha-beta T cell activation                                              | 19/292 | /23  | E-   | E- | 1 |
|    | 631  |                                                                           |        | 328  | 13   | 12 | 9 |
|    | GO:  |                                                                           | 166    | 3.26 | 2.92 |    |   |
| BP | 0051 | regulation of protein kinase B signaling                                  | 19/292 | /23  | E-   | E- | 1 |
|    | 896  |                                                                           |        | 328  | 13   | 12 | 9 |
|    | GO:  |                                                                           | 215    | 4.21 | 3.75 |    |   |
| BP | 0007 | I-kappaB kinase/NF-kappaB signaling                                       | 21/292 | /23  | E-   | E- | 2 |
|    | 249  |                                                                           |        | 328  | 13   | 12 | 1 |
|    | GO:  |                                                                           | 413    | 4.61 | 4.09 |    |   |
| BP | 2001 | regulation of apoptotic signaling pathway                                 | 28/292 | /23  | E-   | E- | 2 |
|    | 233  |                                                                           |        | 328  | 13   | 12 | 8 |
|    | GO:  |                                                                           | 478    | 4.74 | 4.19 |    |   |
| BP | 0071 | protein localization to extracellular region                              | 30/292 | /23  | E-   | E- | 3 |
|    | 692  |                                                                           |        | 328  | 13   | 12 | 0 |
|    | GO:  |                                                                           | 75/    | 4.80 | 4.22 |    |   |
| BP | 0032 | interleukin-8 production                                                  | 14/292 | 233  | E-   | E- | 1 |
|    | 637  |                                                                           |        | 28   | 13   | 12 | 4 |
|    | GO:  |                                                                           | 27/    | 5.66 | 4.95 |    |   |
| BP | 0048 | negative regulation of axon extension involved in axon guidance           | 10/292 | 233  | E-   | E- | 1 |
|    | 843  |                                                                           |        | 28   | 13   | 12 | 0 |
|    | GO:  |                                                                           | 482    | 5.87 | 5.11 |    |   |
| BP | 0007 | axonogenesis                                                              | 30/292 | /23  | E-   | E- | 3 |
|    | 409  |                                                                           |        | 328  | 13   | 12 | 0 |
|    | GO:  |                                                                           | 219    | 6.04 | 5.24 |    |   |
| BP | 0007 | adenylate cyclase-modulating G protein-coupled receptor signaling pathway | 21/292 | /23  | E-   | E- | 2 |
|    | 188  |                                                                           |        | 328  | 13   | 12 | 1 |
|    | GO:  |                                                                           | 37/    | 6.27 | 5.38 |    |   |
| BP | 0048 | axon extension involved in axon guidance                                  | 11/292 | 233  | E-   | E- | 1 |
|    | 846  |                                                                           |        | 28   | 13   | 12 | 1 |
|    | GO:  |                                                                           | 37/    | 6.27 | 5.38 |    |   |
| BP | 1902 | neuron projection extension involved in neuron projection guidance        | 11/292 | 233  | E-   | E- | 1 |
|    | 284  |                                                                           |        | 28   | 13   | 12 | 1 |
|    | GO:  |                                                                           | 299    | 6.38 | 5.45 |    |   |
| BP | 1901 | cellular response to peptide                                              | 24/292 | /23  | E-   | E- | 2 |
|    | 653  |                                                                           |        | 328  | 13   | 12 | 4 |
|    | GO:  |                                                                           | 28/    | 8.71 | 7.40 |    |   |
| BP | 1902 | negative regulation of axon guidance                                      | 10/292 | 233  | E-   | E- | 1 |
|    | 668  |                                                                           |        | 28   | 13   | 12 | 0 |

|    |                                                       |        |     |      |      |   |
|----|-------------------------------------------------------|--------|-----|------|------|---|
|    | GO:                                                   |        | 363 | 9.38 | 7.94 | 2 |
| BP | 0019 regulation of lipid metabolic process            | 26/292 | /23 | E-   | E-   | 6 |
|    | 216                                                   |        | 328 | 13   | 12   |   |
|    | GO:                                                   |        | 200 | 9.94 | 8.38 | 2 |
| BP | 0001 cell killing                                     | 20/292 | /23 | E-   | E-   | 0 |
|    | 906                                                   |        | 328 | 13   | 12   |   |
|    | GO:                                                   |        | 251 | 1.04 | 8.72 | 2 |
| BP | 0007 axon guidance                                    | 22/292 | /23 | E-   | E-   | 2 |
|    | 411                                                   |        | 328 | 12   | 12   |   |
|    | GO:                                                   |        | 252 | 1.13 | 9.41 | 2 |
| BP | 0097 neuron projection guidance                       | 22/292 | /23 | E-   | E-   | 2 |
|    | 485                                                   |        | 328 | 12   | 12   |   |
|    | GO:                                                   |        | 156 | 1.21 | 1.00 | 1 |
| BP | 0032 regulation of interleukin-6 production           | 18/292 | /23 | E-   | E-   | 8 |
|    | 675                                                   |        | 328 | 12   | 11   |   |
|    | GO:                                                   |        | 180 | 1.41 | 1.17 | 1 |
| BP | 1902 positive regulation of leukocyte differentiation | 19/292 | /23 | E-   | E-   | 9 |
|    | 107                                                   |        | 328 | 12   | 11   |   |
|    | GO:                                                   |        | 138 | 1.76 | 1.44 | 1 |
| BP | 0048 axon extension                                   | 17/292 | /23 | E-   | E-   | 7 |
|    | 675                                                   |        | 328 | 12   | 11   |   |
|    | GO:                                                   |        | 138 | 1.76 | 1.44 | 1 |
| BP | 0071 leukocyte apoptotic process                      | 17/292 | /23 | E-   | E-   | 7 |
|    | 887                                                   |        | 328 | 12   | 11   |   |
|    | GO:                                                   |        | 30/ | 1.95 | 1.59 | 1 |
| BP | 0002 regulation of T-helper 1 type immune response    | 10/292 | 233 | E-   | E-   | 0 |
|    | 825                                                   |        | 28  | 12   | 11   |   |
|    | GO:                                                   |        | 208 | 2.07 | 1.68 | 2 |
| BP | 0050 regulation of axonogenesis                       | 20/292 | /23 | E-   | E-   | 0 |
|    | 770                                                   |        | 328 | 12   | 11   |   |
|    | GO:                                                   |        | 41/ | 2.22 | 1.79 | 1 |
| BP | 0002 T cell cytokine production                       | 11/292 | 233 | E-   | E-   | 1 |
|    | 369                                                   |        | 28  | 12   | 11   |   |
|    | GO:                                                   |        | 101 | 2.30 | 1.85 | 1 |
| BP | 0032 positive regulation of interleukin-6 production  | 15/292 | /23 | E-   | E-   | 5 |
|    | 755                                                   |        | 328 | 12   | 11   |   |
|    | GO:                                                   |        | 120 | 2.33 | 1.87 | 1 |
| BP | 0032 regulation of tumor necrosis factor production   | 16/292 | /23 | E-   | E-   | 6 |
|    | 680                                                   |        | 328 | 12   | 11   |   |
|    | GO:                                                   |        | 186 | 2.55 | 2.03 | 1 |
| BP | 1903 regulation of response to wounding               | 19/292 | /23 | E-   | E-   | 9 |
|    | 034                                                   |        | 328 | 12   | 11   |   |

|    |                                                  |        |     |      |      |   |
|----|--------------------------------------------------|--------|-----|------|------|---|
|    | GO:                                              |        | 164 | 2.86 | 2.27 |   |
| BP | 0048 phosphatidylinositol-mediated signaling     | 18/292 | /23 | E-   | E-   | 1 |
|    | 015                                              |        | 328 | 12   | 11   | 8 |
|    | GO:                                              |        | 264 | 2.87 | 2.27 |   |
| BP | 0045 negative regulation of growth               | 22/292 | /23 | E-   | E-   | 2 |
|    | 926                                              |        | 328 | 12   | 11   | 2 |
|    | GO:                                              |        | 69/ | 2.93 | 2.31 |   |
| BP | 0032 regulation of interleukin-8 production      | 13/292 | 233 | E-   | E-   | 1 |
|    | 677                                              |        | 28  | 12   | 11   | 3 |
|    | GO:                                              |        | 122 | 3.02 | 2.36 |   |
| BP | 0016 negative regulation of angiogenesis         | 16/292 | /23 | E-   | E-   | 1 |
|    | 525                                              |        | 328 | 12   | 11   | 6 |
|    | GO:                                              |        | 122 | 3.02 | 2.36 |   |
| BP | 1903 regulation of tumor necrosis factor         | 16/292 | /23 | E-   | E-   | 1 |
|    | 555 superfamily cytokine production              |        | 328 | 12   | 11   | 6 |
|    | GO:                                              |        | 188 | 3.08 | 2.40 |   |
| BP | 0034 response to tumor necrosis factor           | 19/292 | /23 | E-   | E-   | 1 |
|    | 612                                              |        | 328 | 12   | 11   | 9 |
|    | GO:                                              |        | 165 | 3.17 | 2.46 |   |
| BP | 2001 regulation of extrinsic apoptotic signaling | 18/292 | /23 | E-   | E-   | 1 |
|    | 236 pathway                                      |        | 328 | 12   | 11   | 8 |
|    | GO:                                              |        | 55/ | 3.21 | 2.48 |   |
| BP | 0002 regulation of acute inflammatory response   | 12/292 | 233 | E-   | E-   | 1 |
|    | 673                                              |        | 28  | 12   | 11   | 2 |
|    | GO:                                              |        | 267 | 3.59 | 2.76 |   |
| BP | 0048 developmental cell growth                   | 22/292 | /23 | E-   | E-   | 2 |
|    | 588                                              |        | 328 | 12   | 11   | 2 |
|    | GO:                                              |        | 241 | 3.87 | 2.96 |   |
| BP | 0030 regulation of ossification                  | 21/292 | /23 | E-   | E-   | 2 |
|    | 278                                              |        | 328 | 12   | 11   | 1 |
|    | GO:                                              |        | 167 | 3.90 | 2.97 |   |
| BP | 0048 inositol lipid-mediated signaling           | 18/292 | /23 | E-   | E-   | 1 |
|    | 017                                              |        | 328 | 12   | 11   | 8 |
|    | GO:                                              |        | 56/ | 4.04 | 3.06 |   |
| BP | 0044 regulation of endocrine process             | 12/292 | 233 | E-   | E-   | 1 |
|    | 060                                              |        | 28  | 12   | 11   | 2 |
|    | GO:                                              |        | 126 | 5.00 | 3.77 |   |
| BP | 0032 tumor necrosis factor production            | 16/292 | /23 | E-   | E-   | 1 |
|    | 640                                              |        | 328 | 12   | 11   | 6 |
|    | GO:                                              |        | 126 | 5.00 | 3.77 |   |
| BP | 2000 negative regulation of blood vessel         | 16/292 | /23 | E-   | E-   | 1 |
|    | 181 morphogenesis                                |        | 328 | 12   | 11   | 6 |

|    |                                                             |        |     |      |      |   |
|----|-------------------------------------------------------------|--------|-----|------|------|---|
|    | GO: G protein-coupled receptor signaling                    |        | 246 | 5.74 | 4.31 | 2 |
| BP | 0007 pathway, coupled to cyclic nucleotide second messenger | 21/292 | /23 | E-   | E-   | 1 |
|    | 187                                                         |        | 328 | 12   | 11   |   |
|    | GO: pattern recognition receptor signaling                  |        | 149 | 6.20 | 4.63 | 1 |
| BP | 0002 pathway                                                | 17/292 | /23 | E-   | E-   | 7 |
|    | 221                                                         |        | 328 | 12   | 11   |   |
|    | GO: neural crest cell migration                             |        | 58/ | 6.30 | 4.69 | 1 |
| BP | 0001                                                        | 12/292 | 233 | E-   | E-   | 2 |
|    | 755                                                         |        | 28  | 12   | 11   |   |
|    | GO: tumor necrosis factor superfamily cytokine production   |        | 128 | 6.39 | 4.74 | 1 |
| BP | 0071                                                        | 16/292 | /23 | E-   | E-   | 6 |
|    | 706                                                         |        | 328 | 12   | 11   |   |
|    | GO: regulation of calcium ion transport                     |        | 275 | 6.45 | 4.76 | 2 |
| BP | 0051                                                        | 22/292 | /23 | E-   | E-   | 2 |
|    | 924                                                         |        | 328 | 12   | 11   |   |
|    | GO: regulation of lymphocyte mediated immunity              |        | 196 | 6.48 | 4.76 | 1 |
| BP | 0002                                                        | 19/292 | /23 | E-   | E-   | 9 |
|    | 706                                                         |        | 328 | 12   | 11   |   |
|    | GO: negative regulation of hormone secretion                |        | 90/ | 6.55 | 4.78 | 1 |
| BP | 0046                                                        | 14/292 | 233 | E-   | E-   | 4 |
|    | 888                                                         |        | 28  | 12   | 11   |   |
|    | GO: stem cell development                                   |        | 90/ | 6.55 | 4.78 | 1 |
| BP | 0048                                                        | 14/292 | 233 | E-   | E-   | 4 |
|    | 864                                                         |        | 28  | 12   | 11   |   |
|    | GO: regulation of blood circulation                         |        | 248 | 6.70 | 4.87 | 2 |
| BP | 1903                                                        | 21/292 | /23 | E-   | E-   | 1 |
|    | 522                                                         |        | 328 | 12   | 11   |   |
|    | GO: regulation of protein secretion                         |        | 365 | 6.97 | 5.02 | 2 |
| BP | 0050                                                        | 25/292 | /23 | E-   | E-   | 5 |
|    | 708                                                         |        | 328 | 12   | 11   |   |
|    | GO: negative regulation of nervous system development       |        | 365 | 6.97 | 5.02 | 2 |
| BP | 0051                                                        | 25/292 | /23 | E-   | E-   | 5 |
|    | 961                                                         |        | 328 | 12   | 11   |   |
|    | GO: CD4-positive, alpha-beta T cell cytokine production     |        | 24/ | 7.40 | 5.31 |   |
| BP | 0035                                                        | 9/292  | 233 | E-   | E-   | 9 |
|    | 743                                                         |        | 28  | 12   | 11   |   |
|    | GO: mammary gland morphogenesis                             |        | 59/ | 7.82 | 5.60 | 1 |
| BP | 0060                                                        | 12/292 | 233 | E-   | E-   | 2 |
|    | 443                                                         |        | 28  | 12   | 11   |   |
|    | GO: feeding behavior                                        |        | 130 | 8.14 | 5.79 | 1 |
| BP | 0007                                                        | 16/292 | /23 | E-   | E-   | 6 |
|    | 631                                                         |        | 328 | 12   | 11   |   |

|    |                                                                       |        |     |      |      |  |   |
|----|-----------------------------------------------------------------------|--------|-----|------|------|--|---|
|    | GO:                                                                   |        | 432 | 8.16 | 5.79 |  | 2 |
| BP | 0002 lymphocyte mediated immunity                                     | 27/292 | /23 | E-   | E-   |  | 7 |
|    | 449                                                                   |        | 328 | 12   | 11   |  |   |
|    | GO:                                                                   |        | 110 | 8.20 | 5.79 |  | 1 |
| BP | 2000 regulation of leukocyte apoptotic process                        | 15/292 | /23 | E-   | E-   |  | 5 |
|    | 106                                                                   |        | 328 | 12   | 11   |  |   |
|    | GO:                                                                   |        | 337 | 8.23 | 5.79 |  | 2 |
| BP | 0050 negative regulation of neurogenesis                              | 24/292 | /23 | E-   | E-   |  | 4 |
|    | 768                                                                   |        | 328 | 12   | 11   |  |   |
|    | GO:                                                                   |        | 199 | 8.48 | 5.95 |  | 1 |
| BP | 0030 negative regulation of cell growth                               | 19/292 | /23 | E-   | E-   |  | 9 |
|    | 308                                                                   |        | 328 | 12   | 11   |  |   |
|    | GO:                                                                   |        | 46/ | 8.86 | 6.19 |  | 1 |
| BP | 1902 regulation of axon guidance                                      | 11/292 | 233 | E-   | E-   |  | 1 |
|    | 667                                                                   |        | 28  | 12   | 11   |  |   |
|    | GO:                                                                   |        | 154 | 1.06 | 7.39 |  | 1 |
| BP | 0002 positive regulation of response to biotic stimulus               | 17/292 | /23 | E-   | E-   |  | 7 |
|    | 833                                                                   |        | 328 | 11   | 11   |  |   |
|    | GO:                                                                   |        | 47/ | 1.14 | 7.93 |  | 1 |
| BP | 0030 negative regulation of axon extension                            | 11/292 | 233 | E-   | E-   |  | 1 |
|    | 517                                                                   |        | 28  | 11   | 11   |  |   |
|    | GO:                                                                   |        | 61/ | 1.19 | 8.23 |  | 1 |
| BP | 0032 interleukin-12 production                                        | 12/292 | 233 | E-   | E-   |  | 2 |
|    | 615                                                                   |        | 28  | 11   | 11   |  |   |
|    | GO:                                                                   |        | 203 | 1.20 | 8.29 |  | 1 |
| BP | 0002 lymphocyte activation involved in immune response                | 19/292 | /23 | E-   | E-   |  | 9 |
|    | 285                                                                   |        | 328 | 11   | 11   |  |   |
|    | GO:                                                                   |        | 285 | 1.31 | 8.96 |  | 2 |
| BP | 0002 leukocyte activation involved in immune response                 | 22/292 | /23 | E-   | E-   |  | 2 |
|    | 366                                                                   |        | 328 | 11   | 11   |  |   |
|    | GO:                                                                   |        | 442 | 1.38 | 9.43 |  | 2 |
| BP | 0071 regulation of protein serine/threonine kinase activity           | 27/292 | /23 | E-   | E-   |  | 7 |
|    | 900                                                                   |        | 328 | 11   | 11   |  |   |
|    | GO:                                                                   |        | 78/ | 1.51 | 1.03 |  | 1 |
| BP | 0061 mammary gland epithelium development                             | 13/292 | 233 | E-   | E-   |  | 3 |
|    | 180                                                                   |        | 28  | 11   | 10   |  |   |
|    | GO:                                                                   |        | 260 | 1.65 | 1.12 |  | 2 |
| BP | 0051 positive regulation of DNA-binding transcription factor activity | 21/292 | /23 | E-   | E-   |  | 1 |
|    | 091                                                                   |        | 328 | 11   | 10   |  |   |
|    | GO:                                                                   |        | 182 | 1.68 | 1.14 |  | 1 |
| BP | 0043 negative regulation of neuron apoptotic process                  | 18/292 | /23 | E-   | E-   |  | 8 |
|    | 524                                                                   |        | 328 | 11   | 10   |  |   |



|    |      |                                                |        |     |      |      |   |
|----|------|------------------------------------------------|--------|-----|------|------|---|
|    | GO:  |                                                |        | 289 | 1.72 | 1.16 |   |
| BP | 0002 | cell activation involved in immune response    | 22/292 | /23 | E-   | E-   | 2 |
|    | 263  |                                                |        | 328 | 11   | 10   | 2 |
|    | GO:  |                                                |        | 63/ | 1.78 | 1.20 |   |
| BP | 0032 | positive regulation of tumor necrosis factor   | 12/292 | 233 | E-   | E-   | 1 |
|    | 760  | production                                     |        | 28  | 11   | 10   | 2 |
|    | GO:  |                                                |        | 137 | 1.83 | 1.23 |   |
| BP | 0034 | response to interferon-gamma                   | 16/292 | /23 | E-   | E-   | 1 |
|    | 341  |                                                |        | 328 | 11   | 10   | 6 |
|    | GO:  |                                                |        | 37/ | 2.09 | 1.39 |   |
| BP | 0002 | positive regulation of acute inflammatory      | 10/292 | 233 | E-   | E-   | 1 |
|    | 675  | response                                       |        | 28  | 11   | 10   | 0 |
|    | GO:  |                                                |        | 64/ | 2.17 | 1.44 |   |
| BP | 1903 | positive regulation of tumor necrosis factor   | 12/292 | 233 | E-   | E-   | 1 |
|    | 557  | superfamily cytokine production                |        | 28  | 11   | 10   | 2 |
|    | GO:  |                                                |        | 185 | 2.21 | 1.46 |   |
| BP | 0002 | positive regulation of leukocyte mediated      | 18/292 | /23 | E-   | E-   | 1 |
|    | 705  | immunity                                       |        | 328 | 11   | 10   | 8 |
|    | GO:  |                                                |        | 185 | 2.21 | 1.46 |   |
| BP | 0043 | regulation of I-kappaB kinase/NF-kappaB        | 18/292 | /23 | E-   | E-   | 1 |
|    | 122  | signaling                                      |        | 328 | 11   | 10   | 8 |
|    | GO:  |                                                |        | 237 | 2.29 | 1.51 |   |
| BP | 0048 | stem cell differentiation                      | 20/292 | /23 | E-   | E-   | 2 |
|    | 863  |                                                |        | 328 | 11   | 10   | 0 |
|    | GO:  |                                                |        | 387 | 2.47 | 1.62 |   |
| BP | 0010 | negative regulation of cell development        | 25/292 | /23 | E-   | E-   | 2 |
|    | 721  |                                                |        | 328 | 11   | 10   | 5 |
|    | GO:  |                                                |        | 213 | 2.80 | 1.83 |   |
| BP | 0008 | regulation of cell size                        | 19/292 | /23 | E-   | E-   | 1 |
|    | 361  |                                                |        | 328 | 11   | 10   | 9 |
|    | GO:  |                                                |        | 330 | 3.52 | 2.28 |   |
| BP | 0048 | homeostasis of number of cells                 | 23/292 | /23 | E-   | E-   | 2 |
|    | 872  |                                                |        | 328 | 11   | 10   | 3 |
|    | GO:  |                                                |        | 243 | 3.61 | 2.34 |   |
| BP | 0034 | positive regulation of transmembrane           | 20/292 | /23 | E-   | E-   | 2 |
|    | 764  | transport                                      |        | 328 | 11   | 10   | 0 |
|    | GO:  |                                                |        | 52/ | 3.75 | 2.42 |   |
| BP | 0032 | positive regulation of interleukin-8           | 11/292 | 233 | E-   | E-   | 1 |
|    | 757  | production                                     |        | 28  | 11   | 10   | 1 |
|    | GO:  |                                                |        | 167 | 3.92 | 2.52 |   |
| BP | 0045 | positive regulation of lipid metabolic process | 17/292 | /23 | E-   | E-   | 1 |
|    | 834  |                                                |        | 328 | 11   | 10   | 7 |

|    |                                                       |        |     |      |      |   |
|----|-------------------------------------------------------|--------|-----|------|------|---|
|    | GO:                                                   |        | 84/ | 4.01 | 2.57 | 1 |
| BP | 0014 neural crest cell development                    | 13/292 | 233 | E-   | E-   | 3 |
|    | 032                                                   |        | 28  | 11   | 10   |   |
|    | GO:                                                   |        | 68/ | 4.60 | 2.94 | 1 |
| BP | 0050 negative regulation of axonogenesis              | 12/292 | 233 | E-   | E-   | 2 |
|    | 771                                                   |        | 28  | 11   | 10   |   |
|    | GO:                                                   |        | 169 | 4.74 | 3.02 | 1 |
| BP | 0071 cellular response to tumor necrosis factor       | 17/292 | /23 | E-   | E-   | 7 |
|    | 356                                                   |        | 328 | 11   | 10   |   |
|    | GO:                                                   |        | 146 | 4.86 | 3.08 | 1 |
| BP | 0061 regulation of wound healing                      | 16/292 | /23 | E-   | E-   | 6 |
|    | 041                                                   |        | 328 | 11   | 10   |   |
|    | GO:                                                   |        | 40/ | 4.93 | 3.11 | 1 |
| BP | 0042 type 2 immune response                           | 10/292 | 233 | E-   | E-   | 0 |
|    | 092                                                   |        | 28  | 11   | 10   |   |
|    | GO:                                                   |        | 29/ | 5.36 | 3.38 |   |
| BP | 0002 tolerance induction                              | 9/292  | 233 | E-   | E-   | 9 |
|    | 507                                                   |        | 28  | 11   | 10   |   |
|    | GO:                                                   |        | 69/ | 5.51 | 3.46 | 1 |
| BP | 0048 positive regulation of fibroblast proliferation  | 12/292 | 233 | E-   | E-   | 2 |
|    | 146                                                   |        | 28  | 11   | 10   |   |
|    | GO:                                                   |        | 249 | 5.61 | 3.51 | 2 |
| BP | 0010 glial cell differentiation                       | 20/292 | /23 | E-   | E-   | 0 |
|    | 001                                                   |        | 328 | 11   | 10   |   |
|    | GO:                                                   |        | 41/ | 6.44 | 4.00 | 1 |
| BP | 0006 acute-phase response                             | 10/292 | 233 | E-   | E-   | 0 |
|    | 953                                                   |        | 28  | 11   | 10   |   |
|    | GO:                                                   |        | 41/ | 6.44 | 4.00 | 1 |
| BP | 0060 mammary gland duct morphogenesis                 | 10/292 | 233 | E-   | E-   | 0 |
|    | 603                                                   |        | 28  | 11   | 10   |   |
|    | GO:                                                   |        | 198 | 6.88 | 4.26 | 1 |
| BP | 1990 neuron projection extension                      | 18/292 | /23 | E-   | E-   | 8 |
|    | 138                                                   |        | 328 | 11   | 10   |   |
|    | GO:                                                   |        | 55/ | 7.19 | 4.44 | 1 |
| BP | 0002 positive regulation of cytokine production       | 11/292 | 233 | E-   | E-   | 1 |
|    | involved in immune response                           |        | 28  | 11   | 10   |   |
|    | 720                                                   |        | 13/ | 7.21 | 4.44 |   |
|    | GO:                                                   |        | 13/ | 7.21 | 4.44 |   |
| BP | 0001 fever generation                                 | 7/292  | 233 | E-   | E-   | 7 |
|    | 660                                                   |        | 28  | 11   | 10   |   |
|    | GO:                                                   |        | 150 | 7.33 | 4.48 | 1 |
| BP | 0010 positive regulation of epithelial cell migration | 16/292 | /23 | E-   | E-   | 6 |
|    | 634                                                   |        | 328 | 11   | 10   |   |

|    |                                                             |        |     |      |      |   |
|----|-------------------------------------------------------------|--------|-----|------|------|---|
|    | GO:                                                         |        | 150 | 7.33 | 4.48 |   |
| BP | 0031 regeneration                                           | 16/292 | /23 | E-   | E-   | 1 |
|    | 099                                                         |        | 328 | 11   | 10   | 6 |
|    | GO:                                                         |        | 108 | 8.28 | 5.04 | 1 |
| BP | 0045 positive regulation of myeloid cell differentiation    | 14/292 | /23 | E-   | E-   | 4 |
|    | 639                                                         |        | 328 | 11   | 10   |   |
|    | GO:                                                         |        | 129 | 8.44 | 5.12 | 1 |
| BP | 0033 positive regulation of peptidyl-serine phosphorylation | 15/292 | /23 | E-   | E-   | 5 |
|    | 138                                                         |        | 328 | 11   | 10   |   |
|    | GO:                                                         |        | 89/ | 8.53 | 5.16 | 1 |
| BP | 0014 mesenchymal cell development                           | 13/292 | 233 | E-   | E-   | 3 |
|    | 031                                                         |        | 28  | 11   | 10   |   |
|    | GO:                                                         |        | 176 | 9.04 | 5.43 | 1 |
| BP | 0035 regulation of tube diameter                            | 17/292 | /23 | E-   | E-   | 7 |
|    | 296                                                         |        | 328 | 11   | 10   |   |
|    | GO:                                                         |        | 176 | 9.04 | 5.43 | 1 |
| BP | 0097 regulation of blood vessel diameter                    | 17/292 | /23 | E-   | E-   | 7 |
|    | 746                                                         |        | 328 | 11   | 10   |   |
|    | GO:                                                         |        | 21/ | 9.68 | 5.80 |   |
| BP | 1901 regulation of lymphocyte chemotaxis                    | 8/292  | 233 | E-   | E-   | 8 |
|    | 623                                                         |        | 28  | 11   | 10   |   |
|    | GO:                                                         |        | 177 | 9.89 | 5.90 | 1 |
| BP | 0035 regulation of tube size                                | 17/292 | /23 | E-   | E-   | 7 |
|    | 150                                                         |        | 328 | 11   | 10   |   |
|    | GO:                                                         |        | 414 | 1.04 | 6.20 | 2 |
| BP | 0030 myeloid cell differentiation                           | 25/292 | /23 | E-   | E-   | 5 |
|    | 099                                                         |        | 328 | 10   | 10   |   |
|    | GO:                                                         |        | 131 | 1.05 | 6.25 | 1 |
| BP | 0048 negative regulation of developmental growth            | 15/292 | /23 | E-   | E-   | 5 |
|    | 640                                                         |        | 328 | 10   | 10   |   |
|    | GO:                                                         |        | 91/ | 1.14 | 6.70 | 1 |
| BP | 0014 positive regulation of gliogenesis                     | 13/292 | 233 | E-   | E-   | 3 |
|    | 015                                                         |        | 28  | 10   | 10   |   |
|    | GO:                                                         |        | 91/ | 1.14 | 6.70 | 1 |
| BP | 0014 neural crest cell differentiation                      | 13/292 | 233 | E-   | E-   | 3 |
|    | 033                                                         |        | 28  | 10   | 10   |   |
|    | GO:                                                         |        | 132 | 1.17 | 6.90 | 1 |
| BP | 0002 T cell mediated immunity                               | 15/292 | /23 | E-   | E-   | 5 |
|    | 456                                                         |        | 328 | 10   | 10   |   |
|    | GO:                                                         |        | 58/ | 1.32 | 7.75 | 1 |
| BP | 0032 regulation of interleukin-12 production                | 11/292 | 233 | E-   | E-   | 1 |
|    | 655                                                         |        | 28  | 10   | 10   |   |

|    |                                                             |        |     |      |      |  |  |  |   |
|----|-------------------------------------------------------------|--------|-----|------|------|--|--|--|---|
|    | GO:                                                         |        | 181 | 1.41 | 8.21 |  |  |  |   |
| BP | 0045 regulation of innate immune response                   | 17/292 | /23 | E-   | E-   |  |  |  | 1 |
|    | 088                                                         |        | 328 | 10   | 10   |  |  |  | 7 |
|    | GO:                                                         |        | 420 | 1.41 | 8.21 |  |  |  | 2 |
| BP | 0006 calcium ion transport                                  | 25/292 | /23 | E-   | E-   |  |  |  | 5 |
|    | 816                                                         |        | 328 | 10   | 10   |  |  |  |   |
|    | GO:                                                         |        | 22/ | 1.50 | 8.73 |  |  |  |   |
| BP | 0031 heat generation                                        | 8/292  | 233 | E-   | E-   |  |  |  | 8 |
|    | 649                                                         |        | 28  | 10   | 10   |  |  |  |   |
|    | GO:                                                         |        | 75/ | 1.53 | 8.84 |  |  |  | 1 |
| BP | 0032 regulation of chemokine production                     | 12/292 | 233 | E-   | E-   |  |  |  | 2 |
|    | 642                                                         |        | 28  | 10   | 10   |  |  |  |   |
|    | GO:                                                         |        | 113 | 1.54 | 8.86 |  |  |  | 1 |
| BP | 0050 regulation of phagocytosis                             | 14/292 | /23 | E-   | E-   |  |  |  | 4 |
|    | 764                                                         |        | 328 | 10   | 10   |  |  |  |   |
|    | GO:                                                         |        | 45/ | 1.75 | 1.01 |  |  |  | 1 |
| BP | 0050 positive chemotaxis                                    | 10/292 | 233 | E-   | E-   |  |  |  | 0 |
|    | 918                                                         |        | 28  | 10   | 09   |  |  |  |   |
|    | GO:                                                         |        | 159 | 1.77 | 1.01 |  |  |  | 1 |
| BP | 1990 adaptive thermogenesis                                 | 16/292 | /23 | E-   | E-   |  |  |  | 6 |
|    | 845                                                         |        | 328 | 10   | 09   |  |  |  |   |
|    | GO:                                                         |        | 77/ | 2.10 | 1.20 |  |  |  | 1 |
| BP | 0006 nitric oxide biosynthetic process                      | 12/292 | 233 | E-   | E-   |  |  |  | 2 |
|    | 809                                                         |        | 28  | 10   | 09   |  |  |  |   |
|    | GO:                                                         |        | 23/ | 2.28 | 1.30 |  |  |  |   |
| BP | 0002 positive regulation of T-helper 1 type immune response | 8/292  | 233 | E-   | E-   |  |  |  | 8 |
|    | 827                                                         |        | 28  | 10   | 09   |  |  |  |   |
|    | GO:                                                         |        | 61/ | 2.35 | 1.33 |  |  |  | 1 |
| BP | 0060 endocrine hormone secretion                            | 11/292 | 233 | E-   | E-   |  |  |  | 1 |
|    | 986                                                         |        | 28  | 10   | 09   |  |  |  |   |
|    | GO:                                                         |        | 467 | 2.53 | 1.43 |  |  |  | 2 |
| BP | 0070 divalent metal ion transport                           | 26/292 | /23 | E-   | E-   |  |  |  | 6 |
|    | 838                                                         |        | 328 | 10   | 09   |  |  |  |   |
|    | GO:                                                         |        | 118 | 2.76 | 1.56 |  |  |  | 1 |
| BP | 0046 alpha-beta T cell differentiation                      | 14/292 | /23 | E-   | E-   |  |  |  | 4 |
|    | 632                                                         |        | 328 | 10   | 09   |  |  |  |   |
|    | GO:                                                         |        | 164 | 2.81 | 1.58 |  |  |  | 1 |
| BP | 0033 regulation of peptidyl-serine phosphorylation          | 16/292 | /23 | E-   | E-   |  |  |  | 6 |
|    | 135                                                         |        | 328 | 10   | 09   |  |  |  |   |
|    | GO:                                                         |        | 164 | 2.81 | 1.58 |  |  |  | 1 |
| BP | 0046 positive regulation of hormone secretion               | 16/292 | /23 | E-   | E-   |  |  |  | 6 |
|    | 887                                                         |        | 328 | 10   | 09   |  |  |  |   |

|    |                                                               |        |     |      |      |   |
|----|---------------------------------------------------------------|--------|-----|------|------|---|
|    | GO:                                                           |        | 79/ | 2.87 | 1.60 |   |
| BP | 0032 chemokine production                                     | 12/292 | 233 | E-   | E-   | 1 |
|    | 602                                                           |        | 28  | 10   | 09   | 2 |
|    | GO:                                                           |        | 79/ | 2.87 | 1.60 |   |
| BP | 0051 positive regulation of cell division                     | 12/292 | 233 | E-   | E-   | 1 |
|    | 781                                                           |        | 28  | 10   | 09   | 2 |
|    | GO:                                                           |        | 470 | 2.91 | 1.62 |   |
| BP | 0072 divalent inorganic cation transport                      | 26/292 | /23 | E-   | E-   | 2 |
|    | 511                                                           |        | 328 | 10   | 09   | 6 |
|    | GO:                                                           |        | 24/ | 3.38 | 1.88 |   |
| BP | 0030 ovulation                                                | 8/292  | 233 | E-   | E-   | 8 |
|    | 728                                                           |        | 28  | 10   | 09   |   |
|    | GO:                                                           |        | 48/ | 3.48 | 1.91 |   |
| BP | 0001 microglial cell activation                               | 10/292 | 233 | E-   | E-   | 1 |
|    | 774                                                           |        | 28  | 10   | 09   | 0 |
|    | GO:                                                           |        | 48/ | 3.48 | 1.91 |   |
| BP | 0002 leukocyte activation involved in inflammatory response   | 10/292 | 233 | E-   | E-   | 1 |
|    | 269                                                           |        | 28  | 10   | 09   | 0 |
|    | GO:                                                           |        | 48/ | 3.48 | 1.91 |   |
| BP | 0045 positive regulation of nitric oxide biosynthetic process | 10/292 | 233 | E-   | E-   | 1 |
|    | 429                                                           |        | 28  | 10   | 09   | 0 |
|    | GO:                                                           |        | 406 | 3.85 | 2.11 |   |
| BP | 0006 humoral immune response                                  | 24/292 | /23 | E-   | E-   | 2 |
|    | 959                                                           |        | 328 | 10   | 09   | 4 |
|    | GO:                                                           |        | 81/ | 3.87 | 2.11 |   |
| BP | 0046 nitric oxide metabolic process                           | 12/292 | 233 | E-   | E-   | 1 |
|    | 209                                                           |        | 28  | 10   | 09   | 2 |
|    | GO:                                                           |        | 220 | 3.89 | 2.12 |   |
| BP | 0002 myeloid leukocyte differentiation                        | 18/292 | /23 | E-   | E-   | 1 |
|    | 573                                                           |        | 328 | 10   | 09   | 8 |
|    | GO:                                                           |        | 477 | 3.99 | 2.16 |   |
| BP | 0048 reproductive structure development                       | 26/292 | /23 | E-   | E-   | 2 |
|    | 608                                                           |        | 328 | 10   | 09   | 6 |
|    | GO:                                                           |        | 144 | 4.07 | 2.20 |   |
| BP | 0002 positive regulation of lymphocyte mediated immunity      | 15/292 | /23 | E-   | E-   | 1 |
|    | 708                                                           |        | 328 | 10   | 09   | 5 |
|    | GO:                                                           |        | 49/ | 4.32 | 2.33 |   |
| BP | 1904 positive regulation of nitric oxide metabolic process    | 10/292 | 233 | E-   | E-   | 1 |
|    | 407                                                           |        | 28  | 10   | 09   | 0 |
|    | GO:                                                           |        | 195 | 4.52 | 2.43 |   |
| BP | 0019 cAMP-mediated signaling                                  | 17/292 | /23 | E-   | E-   | 1 |
|    | 933                                                           |        | 328 | 10   | 09   | 7 |

|    |                                                           |        |     |      |      |   |
|----|-----------------------------------------------------------|--------|-----|------|------|---|
|    | GO:                                                       |        | 376 | 4.66 | 2.50 | 2 |
| BP | 0001 urogenital system development                        | 23/292 | /23 | E-   | E-   | 3 |
|    | 655                                                       |        | 328 | 10   | 09   |   |
|    | GO:                                                       |        | 481 | 4.77 | 2.55 | 2 |
| BP | 0061 reproductive system development                      | 26/292 | /23 | E-   | E-   | 6 |
|    | 458                                                       |        | 328 | 10   | 09   |   |
|    | GO:                                                       |        | 223 | 4.84 | 2.58 | 1 |
| BP | 0019 cyclic-nucleotide-mediated signaling                 | 18/292 | /23 | E-   | E-   | 8 |
|    | 935                                                       |        | 328 | 10   | 09   |   |
|    | GO:                                                       |        | 312 | 4.87 | 2.59 | 2 |
| BP | 0045 positive regulation of growth                        | 21/292 | /23 | E-   | E-   | 1 |
|    | 927                                                       |        | 328 | 10   | 09   |   |
|    | GO:                                                       |        | 196 | 4.90 | 2.60 | 1 |
| BP | 0048 tissue remodeling                                    | 17/292 | /23 | E-   | E-   | 7 |
|    | 771                                                       |        | 328 | 10   | 09   |   |
|    | GO:                                                       |        | 224 | 5.21 | 2.75 | 1 |
| BP | 0045 regulation of myeloid cell differentiation           | 18/292 | /23 | E-   | E-   | 8 |
|    | 637                                                       |        | 328 | 10   | 09   |   |
|    | GO:                                                       |        | 413 | 5.42 | 2.86 | 2 |
| BP | 0032 regulation of cellular component size                | 24/292 | /23 | E-   | E-   | 4 |
|    | 535                                                       |        | 328 | 10   | 09   |   |
|    | GO:                                                       |        | 125 | 6.00 | 3.16 | 1 |
| BP | 1903 reactive oxygen species biosynthetic process         | 14/292 | /23 | E-   | E-   | 4 |
|    | 409                                                       |        | 328 | 10   | 09   |   |
|    | GO:                                                       |        | 37/ | 6.10 | 3.20 |   |
| BP | 2000 positive regulation of signaling receptor activity   | 9/292  | 233 | E-   | E-   | 9 |
|    | 273                                                       |        | 28  | 10   | 09   |   |
|    | GO:                                                       |        | 51/ | 6.58 | 3.44 | 1 |
| BP | 0032 positive regulation of chemokine production          | 10/292 | 233 | E-   | E-   | 0 |
|    | 722                                                       |        | 28  | 10   | 09   |   |
|    | GO:                                                       |        | 67/ | 6.76 | 3.52 | 1 |
| BP | 0060 regulation of morphogenesis of a branching structure | 11/292 | 233 | E-   | E-   | 1 |
|    | 688                                                       |        | 28  | 10   | 09   |   |
|    | GO:                                                       |        | 85/ | 6.89 | 3.58 | 1 |
| BP | 0043 CD4-positive, alpha-beta T cell differentiation      | 12/292 | 233 | E-   | E-   | 2 |
|    | 367                                                       |        | 28  | 10   | 09   |   |
|    | GO:                                                       |        | 10/ | 7.36 | 3.81 |   |
| BP | 0031 regulation of fever generation                       | 6/292  | 233 | E-   | E-   | 6 |
|    | 620                                                       |        | 28  | 10   | 09   |   |
|    | GO:                                                       |        | 17/ | 7.83 | 4.05 |   |
| BP | 0140 positive regulation of lymphocyte chemotaxis         | 7/292  | 233 | E-   | E-   | 7 |
|    | 131                                                       |        | 28  | 10   | 09   |   |

|    |                                                  |        |     |      |      |   |
|----|--------------------------------------------------|--------|-----|------|------|---|
|    | GO:                                              |        | 38/ | 7.91 | 4.06 |   |
| BP | 0014 astrocyte development                       | 9/292  | 233 | E-   | E-   | 9 |
|    | 002                                              |        | 28  | 10   | 09   |   |
|    | GO:                                              |        | 38/ | 7.91 | 4.06 |   |
| BP | 0032 positive regulation of interleukin-10       | 9/292  | 233 | E-   | E-   | 9 |
|    | 733 production                                   |        | 28  | 10   | 09   |   |
|    | GO:                                              |        | 86/ | 7.91 | 4.06 |   |
| BP | 2001 reactive nitrogen species metabolic process | 12/292 | 233 | E-   | E-   | 1 |
|    | 057                                              |        | 28  | 10   | 09   | 2 |
|    | GO:                                              |        | 231 | 8.56 | 4.38 |   |
| BP | 2001 negative regulation of apoptotic signaling  | 18/292 | /23 | E-   | E-   | 1 |
|    | 234 pathway                                      |        | 328 | 10   | 09   | 8 |
|    | GO:                                              |        | 69/ | 9.38 | 4.78 |   |
| BP | 0045 regulation of nitric oxide biosynthetic     | 11/292 | 233 | E-   | E-   | 1 |
|    | 428 process                                      |        | 28  | 10   | 09   | 1 |
|    | GO:                                              |        | 108 | 1.01 | 5.14 |   |
| BP | 0002 toll-like receptor signaling pathway        | 13/292 | /23 | E-   | E-   | 1 |
|    | 224                                              |        | 328 | 09   | 09   | 3 |
|    | GO:                                              |        | 358 | 1.04 | 5.25 |   |
| BP | 0062 regulation of small molecule metabolic      | 22/292 | /23 | E-   | E-   | 2 |
|    | 012 process                                      |        | 328 | 09   | 09   | 2 |
|    | GO:                                              |        | 109 | 1.13 | 5.74 |   |
| BP | 0048 fibroblast proliferation                    | 13/292 | /23 | E-   | E-   | 1 |
|    | 144                                              |        | 328 | 09   | 09   | 3 |
|    | GO:                                              |        | 110 | 1.27 | 6.41 |   |
| BP | 0032 interleukin-1 production                    | 13/292 | /23 | E-   | E-   | 1 |
|    | 612                                              |        | 328 | 09   | 09   | 3 |
|    | GO:                                              |        | 71/ | 1.29 | 6.48 |   |
| BP | 0002 inflammatory response to antigenic stimulus | 11/292 | 233 | E-   | E-   | 1 |
|    | 437                                              |        | 28  | 09   | 09   | 1 |
|    | GO:                                              |        | 210 | 1.42 | 7.12 |   |
| BP | 0050 negative regulation of cell activation      | 17/292 | /23 | E-   | E-   | 1 |
|    | 866                                              |        | 328 | 09   | 09   | 7 |
|    | GO:                                              |        | 399 | 1.47 | 7.35 |   |
| BP | 0042 muscle cell differentiation                 | 23/292 | /23 | E-   | E-   | 2 |
|    | 692                                              |        | 328 | 09   | 09   | 3 |
|    | GO:                                              |        | 158 | 1.50 | 7.48 |   |
| BP | 0050 negative regulation of immune response      | 15/292 | /23 | E-   | E-   | 1 |
|    | 777                                              |        | 328 | 09   | 09   | 5 |
|    | GO:                                              |        | 91/ | 1.54 | 7.64 |   |
| BP | 0001 positive regulation of endothelial cell     | 12/292 | 233 | E-   | E-   | 1 |
|    | 938 proliferation                                |        | 28  | 09   | 09   | 2 |

|    |                                                         |        |     |      |      |   |
|----|---------------------------------------------------------|--------|-----|------|------|---|
|    | GO:                                                     |        | 91/ | 1.54 | 7.64 | 1 |
| BP | 0032 interleukin-1 beta production                      | 12/292 | 233 | E-   | E-   | 2 |
|    | 611                                                     |        | 28  | 09   | 09   |   |
|    | GO:                                                     |        | 91/ | 1.54 | 7.64 | 1 |
| BP | 1903 positive regulation of blood circulation           | 12/292 | 233 | E-   | E-   | 2 |
|    | 524                                                     |        | 28  | 09   | 09   |   |
|    | GO:                                                     |        | 212 | 1.64 | 8.10 | 1 |
| BP | 0043 endothelial cell migration                         | 17/292 | /23 | E-   | E-   | 7 |
|    | 542                                                     |        | 328 | 09   | 09   |   |
|    | GO:                                                     |        | 368 | 1.73 | 8.50 | 2 |
| BP | 0007 transmembrane receptor protein                     | 22/292 | /23 | E-   | E-   | 2 |
|    | 178 serine/threonine kinase signaling pathway           |        | 328 | 09   | 09   |   |
|    | GO:                                                     |        | 56/ | 1.73 | 8.51 | 1 |
| BP | 0071 regulation of mononuclear cell migration           | 10/292 | 233 | E-   | E-   | 0 |
|    | 675                                                     |        | 28  | 09   | 09   |   |
|    | GO:                                                     |        | 92/ | 1.76 | 8.60 | 1 |
| BP | 0014 smooth muscle cell migration                       | 12/292 | 233 | E-   | E-   | 2 |
|    | 909                                                     |        | 28  | 09   | 09   |   |
|    | GO:                                                     |        | 113 | 1.78 | 8.70 | 1 |
| BP | 0003 renal system process                               | 13/292 | /23 | E-   | E-   | 3 |
|    | 014                                                     |        | 328 | 09   | 09   |   |
|    | GO:                                                     |        | 19/ | 1.99 | 9.66 |   |
| BP | 0048 astrocyte activation                               | 7/292  | 233 | E-   | E-   | 7 |
|    | 143                                                     |        | 28  | 09   | 09   |   |
|    | GO:                                                     |        | 114 | 1.99 | 9.66 | 1 |
| BP | 0071 cellular response to interferon-gamma              | 13/292 | /23 | E-   | E-   | 3 |
|    | 346                                                     |        | 328 | 09   | 09   |   |
|    | GO:                                                     |        | 74/ | 2.03 | 9.83 | 1 |
| BP | 0002 T cell differentiation involved in immune response | 11/292 | 233 | E-   | E-   | 1 |
|    | 292                                                     |        | 28  | 09   | 09   |   |
|    | GO:                                                     |        | 74/ | 2.03 | 9.83 | 1 |
| BP | 0007 peripheral nervous system development              | 11/292 | 233 | E-   | E-   | 1 |
|    | 422                                                     |        | 28  | 09   | 09   |   |
|    | GO:                                                     |        | 115 | 2.22 | 1.07 | 1 |
| BP | 0001 leukocyte homeostasis                              | 13/292 | /23 | E-   | E-   | 3 |
|    | 776                                                     |        | 328 | 09   | 08   |   |
|    | GO:                                                     |        | 189 | 2.28 | 1.10 | 1 |
| BP | 0002 negative regulation of leukocyte activation        | 16/292 | /23 | E-   | E-   | 6 |
|    | 695                                                     |        | 328 | 09   | 08   |   |
|    | GO:                                                     |        | 276 | 2.30 | 1.10 | 1 |
| BP | 0061 connective tissue development                      | 19/292 | /23 | E-   | E-   | 9 |
|    | 448                                                     |        | 328 | 09   | 08   |   |



|    |                                                                                |        |     |      |      |   |
|----|--------------------------------------------------------------------------------|--------|-----|------|------|---|
|    | GO:                                                                            |        | 217 | 2.34 | 1.12 |   |
| BP | 0048 positive regulation of developmental growth                               | 17/292 | /23 | E-   | E-   | 1 |
|    | 639                                                                            |        | 328 | 09   | 08   | 7 |
|    | GO:                                                                            |        | 75/ | 2.36 | 1.12 |   |
| BP | 0051 smooth muscle cell differentiation                                        | 11/292 | 233 | E-   | E-   | 1 |
|    | 145                                                                            |        | 28  | 09   | 08   | 1 |
|    | GO:                                                                            |        | 164 | 2.52 | 1.19 |   |
| BP | 0030 mammary gland development                                                 | 15/292 | /23 | E-   | E-   | 1 |
|    | 879                                                                            |        | 328 | 09   | 08   | 5 |
|    | GO:                                                                            |        | 30/ | 2.52 | 1.19 |   |
| BP | 0010 positive regulation of phospholipase C activity                           | 8/292  | 233 | E-   | E-   | 8 |
|    | 863                                                                            |        | 28  | 09   | 08   |   |
|    | GO:                                                                            |        | 30/ | 2.52 | 1.19 |   |
| BP | 0061 myeloid leukocyte cytokine production                                     | 8/292  | 233 | E-   | E-   | 8 |
|    | 082                                                                            |        | 28  | 09   | 08   |   |
|    | GO:                                                                            |        | 278 | 2.60 | 1.22 |   |
| BP | 0030 negative regulation of cell migration                                     | 19/292 | /23 | E-   | E-   | 1 |
|    | 336                                                                            |        | 328 | 09   | 08   | 9 |
|    | GO:                                                                            |        | 140 | 2.70 | 1.27 |   |
| BP | 0007 adenylate cyclase-activating G protein-coupled receptor signaling pathway | 14/292 | /23 | E-   | E-   | 1 |
|    | 189                                                                            |        | 328 | 09   | 08   | 4 |
|    | GO:                                                                            |        | 117 | 2.75 | 1.29 |   |
| BP | 0002 T cell activation involved in immune response                             | 13/292 | /23 | E-   | E-   | 1 |
|    | 286                                                                            |        | 328 | 09   | 08   | 3 |
|    | GO:                                                                            |        | 96/ | 2.89 | 1.35 |   |
| BP | 2000 positive regulation of reproductive process                               | 12/292 | 233 | E-   | E-   | 1 |
|    | 243                                                                            |        | 28  | 09   | 08   | 2 |
|    | GO:                                                                            |        | 59/ | 2.96 | 1.38 |   |
| BP | 0060 positive regulation of lipase activity                                    | 10/292 | 233 | E-   | E-   | 1 |
|    | 193                                                                            |        | 28  | 09   | 08   | 0 |
|    | GO:                                                                            |        | 166 | 2.98 | 1.39 |   |
| BP | 0010 regulation of endothelial cell migration                                  | 15/292 | /23 | E-   | E-   | 1 |
|    | 594                                                                            |        | 328 | 09   | 08   | 5 |
|    | GO:                                                                            |        | 77/ | 3.15 | 1.46 |   |
| BP | 1901 positive regulation of NIK/NF-kappaB signaling                            | 11/292 | 233 | E-   | E-   | 1 |
|    | 224                                                                            |        | 28  | 09   | 08   | 1 |
|    | GO:                                                                            |        | 31/ | 3.36 | 1.56 |   |
| BP | 0045 positive regulation of epidermal growth factor receptor signaling pathway | 8/292  | 233 | E-   | E-   | 8 |
|    | 742                                                                            |        | 28  | 09   | 08   |   |
|    | GO:                                                                            |        | 119 | 3.39 | 1.56 |   |
| BP | 0000 activation of MAPK activity                                               | 13/292 | /23 | E-   | E-   | 1 |
|    | 187                                                                            |        | 328 | 09   | 08   | 3 |

|    |                                                    |        |     |      |      |   |
|----|----------------------------------------------------|--------|-----|------|------|---|
|    | GO:                                                |        | 119 | 3.39 | 1.56 | 1 |
| BP | 0060 regulation of response to cytokine stimulus   | 13/292 | /23 | E-   | E-   | 3 |
|    | 759                                                |        | 328 | 09   | 08   |   |
|    | GO:                                                |        | 60/ | 3.51 | 1.62 | 1 |
| BP | 0072 T cell migration                              | 10/292 | 233 | E-   | E-   | 0 |
|    | 678                                                |        | 28  | 09   | 08   |   |
|    | GO:                                                |        | 98/ | 3.68 | 1.69 | 1 |
| BP | 0032 regulation of interleukin-1 production        | 12/292 | 233 | E-   | E-   | 2 |
|    | 652                                                |        | 28  | 09   | 08   |   |
|    | GO:                                                |        | 144 | 3.90 | 1.78 | 1 |
| BP | 0106 cold-induced thermogenesis                    | 14/292 | /23 | E-   | E-   | 4 |
|    | 106                                                |        | 328 | 09   | 08   |   |
|    | GO:                                                |        | 144 | 3.90 | 1.78 | 1 |
| BP | 0120 regulation of cold-induced thermogenesis      | 14/292 | /23 | E-   | E-   | 4 |
|    | 161                                                |        | 328 | 09   | 08   |   |
|    | GO:                                                |        | 285 | 3.91 | 1.78 | 1 |
| BP | 0030 peptide hormone secretion                     | 19/292 | /23 | E-   | E-   | 9 |
|    | 072                                                |        | 328 | 09   | 08   |   |
|    | GO:                                                |        | 79/ | 4.16 | 1.89 | 1 |
| BP | 0002 regulation of immunoglobulin production       | 11/292 | 233 | E-   | E-   | 1 |
|    | 637                                                |        | 28  | 09   | 08   |   |
|    | GO:                                                |        | 100 | 4.65 | 2.11 | 1 |
| BP | 0010 negative regulation of cell morphogenesis     | 12/292 | /23 | E-   | E-   | 2 |
|    | involved in differentiation                        |        | 328 | 09   | 08   |   |
|    | 771                                                |        |     |      |      |   |
|    | GO:                                                |        | 80/ | 4.77 | 2.16 | 1 |
| BP | 0032 regulation of interleukin-1 beta production   | 11/292 | 233 | E-   | E-   | 1 |
|    | 651                                                |        | 28  | 09   | 08   |   |
|    | GO:                                                |        | 46/ | 4.90 | 2.21 |   |
| BP | 0010 positive regulation of phospholipase activity | 9/292  | 233 | E-   | E-   | 9 |
|    | 518                                                |        | 28  | 09   | 08   |   |
|    | GO:                                                |        | 147 | 5.10 | 2.30 | 1 |
| BP | 0051 positive regulation of NF-kappaB              | 14/292 | /23 | E-   | E-   | 4 |
|    | transcription factor activity                      |        | 328 | 09   | 08   |   |
|    | 092                                                |        |     |      |      |   |
|    | GO:                                                |        | 200 | 5.17 | 2.32 | 1 |
| BP | 0051 cartilage development                         | 16/292 | /23 | E-   | E-   | 6 |
|    | 216                                                |        | 328 | 09   | 08   |   |
|    | GO:                                                |        | 290 | 5.20 | 2.33 | 1 |
| BP | 0007 negative regulation of cell adhesion          | 19/292 | /23 | E-   | E-   | 9 |
|    | 162                                                |        | 328 | 09   | 08   |   |
|    | GO:                                                |        | 101 | 5.22 | 2.33 | 1 |
| BP | 2001 negative regulation of extrinsic apoptotic    | 12/292 | /23 | E-   | E-   | 2 |
|    | signaling pathway                                  |        | 328 | 09   | 08   |   |
|    | 237                                                |        |     |      |      |   |

|    |                                                                          |        |     |      |      |   |
|----|--------------------------------------------------------------------------|--------|-----|------|------|---|
|    | GO:                                                                      |        | 259 | 5.29 | 2.36 | 1 |
| BP | 0045 negative regulation of neuron differentiation                       | 18/292 | /23 | E-   | E-   | 8 |
|    | 665                                                                      |        | 328 | 09   | 08   |   |
|    | GO:                                                                      |        | 291 | 5.50 | 2.45 | 1 |
| BP | 2000 negative regulation of cell motility                                | 19/292 | /23 | E-   | E-   | 9 |
|    | 146                                                                      |        | 328 | 09   | 08   |   |
|    | GO:                                                                      |        | 124 | 5.63 | 2.50 | 1 |
| BP | 0003 regulation of systemic arterial blood pressure                      | 13/292 | /23 | E-   | E-   | 3 |
|    | 073                                                                      |        | 328 | 09   | 08   |   |
|    | GO:                                                                      |        | 63/ | 5.76 | 2.55 | 1 |
| BP | 1903 positive regulation of reactive oxygen species biosynthetic process | 10/292 | 233 | E-   | E-   | 0 |
|    | 428                                                                      |        | 28  | 09   | 08   |   |
|    | GO:                                                                      |        | 33/ | 5.79 | 2.56 |   |
| BP | 1901 positive regulation of ERBB signaling pathway                       | 8/292  | 233 | E-   | E-   | 8 |
|    | 186                                                                      |        | 28  | 09   | 08   |   |
|    | GO:                                                                      |        | 103 | 6.55 | 2.89 | 1 |
| BP | 0042 vasoconstriction                                                    | 12/292 | /23 | E-   | E-   | 2 |
|    | 310                                                                      |        | 328 | 09   | 08   |   |
|    | GO:                                                                      |        | 176 | 6.65 | 2.92 | 1 |
| BP | 0010 negative regulation of neuron projection development                | 15/292 | /23 | E-   | E-   | 5 |
|    | 977                                                                      |        | 328 | 09   | 08   |   |
|    | GO:                                                                      |        | 104 | 7.32 | 3.21 | 1 |
| BP | 1901 regulation of NIK/NF-kappaB signaling                               | 12/292 | /23 | E-   | E-   | 2 |
|    | 222                                                                      |        | 328 | 09   | 08   |   |
|    | GO:                                                                      |        | 34/ | 7.50 | 3.28 |   |
| BP | 1900 regulation of phospholipase C activity                              | 8/292  | 233 | E-   | E-   | 8 |
|    | 274                                                                      |        | 28  | 09   | 08   |   |
|    | GO:                                                                      |        | 65/ | 7.90 | 3.44 | 1 |
| BP | 0042 T-helper cell differentiation                                       | 10/292 | 233 | E-   | E-   | 0 |
|    | 093                                                                      |        | 28  | 09   | 08   |   |
|    | GO:                                                                      |        | 65/ | 7.90 | 3.44 | 1 |
| BP | 2000 regulation of CD4-positive, alpha-beta T cell activation            | 10/292 | 233 | E-   | E-   | 0 |
|    | 514                                                                      |        | 28  | 09   | 08   |   |
|    | GO:                                                                      |        | 84/ | 8.09 | 3.51 | 1 |
| BP | 0050 positive regulation of phagocytosis                                 | 11/292 | 233 | E-   | E-   | 1 |
|    | 766                                                                      |        | 28  | 09   | 08   |   |
|    | GO:                                                                      |        | 106 | 9.12 | 3.95 | 1 |
| BP | 0014 muscle cell migration                                               | 12/292 | /23 | E-   | E-   | 2 |
|    | 812                                                                      |        | 328 | 09   | 08   |   |
|    | GO:                                                                      |        | 85/ | 9.19 | 3.96 | 1 |
| BP | 0007 neuropeptide signaling pathway                                      | 11/292 | 233 | E-   | E-   | 1 |
|    | 218                                                                      |        | 28  | 09   | 08   |   |

|    |      |                                               |        |      |      |    |   |
|----|------|-----------------------------------------------|--------|------|------|----|---|
|    | GO:  |                                               | 85/    | 9.19 | 3.96 |    | 1 |
| BP | 0014 | regulation of smooth muscle cell migration    | 11/292 | 233  | E-   | E- | 1 |
|    | 910  |                                               |        | 28   | 09   | 08 | 1 |
|    | GO:  |                                               | 66/    | 9.20 | 3.96 |    | 1 |
| BP | 0002 | CD4-positive, alpha-beta T cell               | 10/292 | 233  | E-   | E- | 0 |
|    | 294  | differentiation involved in immune response   |        | 28   | 09   | 08 |   |
|    | GO:  |                                               | 154    | 9.33 | 4.00 |    | 1 |
| BP | 0014 | regulation of gliogenesis                     | 14/292 | /23  | E-   | E- | 4 |
|    | 013  |                                               |        | 328  | 09   | 08 |   |
|    | GO:  |                                               | 107    | 1.02 | 4.34 |    | 1 |
| BP | 0048 | regulation of fibroblast proliferation        | 12/292 | /23  | E-   | E- | 2 |
|    | 145  |                                               |        | 328  | 08   | 08 |   |
|    | GO:  |                                               | 107    | 1.02 | 4.34 |    | 1 |
| BP | 1903 | regulation of reactive oxygen species         | 12/292 | /23  | E-   | E- | 2 |
|    | 426  | biosynthetic process                          |        | 328  | 08   | 08 |   |
|    | GO:  |                                               | 336    | 1.04 | 4.43 |    | 2 |
| BP | 0043 | response to peptide hormone                   | 20/292 | /23  | E-   | E- | 0 |
|    | 434  |                                               |        | 328  | 08   | 08 |   |
|    | GO:  |                                               | 86/    | 1.04 | 4.43 |    | 1 |
| BP | 0048 | astrocyte differentiation                     | 11/292 | 233  | E-   | E- | 1 |
|    | 708  |                                               |        | 28   | 08   | 08 |   |
|    | GO:  |                                               | 67/    | 1.07 | 4.54 |    | 1 |
| BP | 0002 | alpha-beta T cell differentiation involved in | 10/292 | 233  | E-   | E- | 0 |
|    | 293  | immune response                               |        | 28   | 08   | 08 |   |
|    | GO:  |                                               | 68/    | 1.24 | 5.25 |    | 1 |
| BP | 0002 | alpha-beta T cell activation involved in      | 10/292 | 233  | E-   | E- | 0 |
|    | 287  | immune response                               |        | 28   | 08   | 08 |   |
|    | GO:  |                                               | 109    | 1.26 | 5.29 |    | 1 |
| BP | 0001 | regulation of cytokine-mediated signaling     | 12/292 | /23  | E-   | E- | 2 |
|    | 959  | pathway                                       |        | 328  | 08   | 08 |   |
|    | GO:  |                                               | 109    | 1.26 | 5.29 |    | 1 |
| BP | 0097 | negative regulation of blood vessel diameter  | 12/292 | /23  | E-   | E- | 2 |
|    | 756  |                                               |        | 328  | 08   | 08 |   |
|    | GO:  |                                               | 51/    | 1.28 | 5.37 |    |   |
| BP | 0031 | lipopolysaccharide-mediated signaling         | 9/292  | 233  | E-   | E- | 9 |
|    | 663  | pathway                                       |        | 28   | 08   | 08 |   |
|    | GO:  |                                               | 51/    | 1.28 | 5.37 |    |   |
| BP | 0060 | positive regulation of response to cytokine   | 9/292  | 233  | E-   | E- | 9 |
|    | 760  | stimulus                                      |        | 28   | 08   | 08 |   |
|    | GO:  |                                               | 24/    | 1.29 | 5.41 |    |   |
| BP | 0036 | response to sterol                            | 7/292  | 233  | E-   | E- | 7 |
|    | 314  |                                               |        | 28   | 08   | 08 |   |

|    |                                                            |        |     |      |      |   |
|----|------------------------------------------------------------|--------|-----|------|------|---|
|    | GO:                                                        |        | 133 | 1.33 | 5.53 | 1 |
| BP | 0044 regulation of anion transport                         | 13/292 | /23 | E-   | E-   | 3 |
|    | 070                                                        |        | 328 | 08   | 08   |   |
|    | GO:                                                        |        | 88/ | 1.33 | 5.56 | 1 |
| BP | 0050 negative regulation of lymphocyte proliferation       | 11/292 | 233 | E-   | E-   | 1 |
|    | 672                                                        |        | 28  | 08   | 08   |   |
|    | GO:                                                        |        | 110 | 1.39 | 5.78 | 1 |
| BP | 0038 NIK/NF-kappaB signaling                               | 12/292 | /23 | E-   | E-   | 2 |
|    | 061                                                        |        | 328 | 08   | 08   |   |
|    | GO:                                                        |        | 110 | 1.39 | 5.78 | 1 |
| BP | 0045 positive regulation of innate immune response         | 12/292 | /23 | E-   | E-   | 2 |
|    | 089                                                        |        | 328 | 08   | 08   |   |
|    | GO:                                                        |        | 159 | 1.41 | 5.81 | 1 |
| BP | 0009 response to temperature stimulus                      | 14/292 | /23 | E-   | E-   | 4 |
|    | 266                                                        |        | 328 | 08   | 08   |   |
|    | GO:                                                        |        | 159 | 1.41 | 5.81 | 1 |
| BP | 0045 regulation of T cell differentiation                  | 14/292 | /23 | E-   | E-   | 4 |
|    | 580                                                        |        | 328 | 08   | 08   |   |
|    | GO:                                                        |        | 89/ | 1.51 | 6.20 | 1 |
| BP | 0032 negative regulation of mononuclear cell proliferation | 11/292 | 233 | E-   | E-   | 1 |
|    | 945                                                        |        | 28  | 08   | 08   |   |
|    | GO:                                                        |        | 187 | 1.51 | 6.22 | 1 |
| BP | 0034 positive regulation of ion transmembrane transport    | 15/292 | /23 | E-   | E-   | 5 |
|    | 767                                                        |        | 328 | 08   | 08   |   |
|    | GO:                                                        |        | 52/ | 1.53 | 6.27 |   |
| BP | 0002 positive regulation of immunoglobulin production      | 9/292  | 233 | E-   | E-   | 9 |
|    | 639                                                        |        | 28  | 08   | 08   |   |
|    | GO:                                                        |        | 52/ | 1.53 | 6.27 |   |
| BP | 0140 lipid export from cell                                | 9/292  | 233 | E-   | E-   | 9 |
|    | 353                                                        |        | 28  | 08   | 08   |   |
|    | GO:                                                        |        | 70/ | 1.66 | 6.75 | 1 |
| BP | 2000 negative regulation of leukocyte apoptotic process    | 10/292 | 233 | E-   | E-   | 0 |
|    | 107                                                        |        | 28  | 08   | 08   |   |
|    | GO:                                                        |        | 15/ | 1.66 | 6.75 |   |
| BP | 0010 regulation of T cell chemotaxis                       | 6/292  | 233 | E-   | E-   | 6 |
|    | 819                                                        |        | 28  | 08   | 08   |   |
|    | GO:                                                        |        | 15/ | 1.66 | 6.75 |   |
| BP | 0031 regulation of heat generation                         | 6/292  | 233 | E-   | E-   | 6 |
|    | 650                                                        |        | 28  | 08   | 08   |   |
|    | GO:                                                        |        | 15/ | 1.66 | 6.75 |   |
| BP | 0050 induction of positive chemotaxis                      | 6/292  | 233 | E-   | E-   | 6 |
|    | 930                                                        |        | 28  | 08   | 08   |   |

|    |                                                                   |        |     |      |      |   |
|----|-------------------------------------------------------------------|--------|-----|------|------|---|
|    | GO:                                                               |        | 25/ | 1.78 | 7.19 |   |
| BP | 0034 regulation of heterotypic cell-cell adhesion                 | 7/292  | 233 | E-   | E-   | 7 |
|    | 114                                                               |        | 28  | 08   | 08   |   |
|    | GO:                                                               |        | 191 | 2.01 | 8.11 | 1 |
| BP | 0051 regulation of nuclear division                               | 15/292 | /23 | E-   | E-   | 5 |
|    | 783                                                               |        | 328 | 08   | 08   |   |
|    | GO:                                                               |        | 191 | 2.01 | 8.11 | 1 |
| BP | 0061 neural precursor cell proliferation                          | 15/292 | /23 | E-   | E-   | 5 |
|    | 351                                                               |        | 328 | 08   | 08   |   |
|    | GO:                                                               |        | 351 | 2.16 | 8.70 | 2 |
| BP | 0010 regulation of cell morphogenesis involved in differentiation | 20/292 | /23 | E-   | E-   | 0 |
|    | 769                                                               |        | 328 | 08   | 08   |   |
|    | GO:                                                               |        | 165 | 2.26 | 9.07 | 1 |
| BP | 0051 regulation of muscle cell differentiation                    | 14/292 | /23 | E-   | E-   | 4 |
|    | 147                                                               |        | 328 | 08   | 08   |   |
|    | GO:                                                               |        | 253 | 2.34 | 9.35 | 1 |
| BP | 0071 cellular response to peptide hormone stimulus                | 17/292 | /23 | E-   | E-   | 7 |
|    | 375                                                               |        | 328 | 08   | 08   |   |
|    | GO:                                                               |        | 26/ | 2.40 | 9.57 |   |
| BP | 0050 positive regulation of positive chemotaxis                   | 7/292  | 233 | E-   | E-   | 7 |
|    | 927                                                               |        | 28  | 08   | 08   |   |
|    | GO:                                                               |        | 39/ | 2.41 | 9.57 |   |
| BP | 0032 positive regulation of interleukin-12 production             | 8/292  | 233 | E-   | E-   | 8 |
|    | 735                                                               |        | 28  | 08   | 08   |   |
|    | GO:                                                               |        | 39/ | 2.41 | 9.57 |   |
| BP | 2000 positive regulation of lymphocyte migration                  | 8/292  | 233 | E-   | E-   | 8 |
|    | 403                                                               |        | 28  | 08   | 08   |   |
|    | GO:                                                               |        | 55/ | 2.56 | 1.02 |   |
| BP | 0010 regulation of collagen metabolic process                     | 9/292  | 233 | E-   | E-   | 9 |
|    | 712                                                               |        | 28  | 08   | 07   |   |
|    | GO:                                                               |        | 16/ | 2.63 | 1.04 |   |
| BP | 0002 positive regulation of type 2 immune response                | 6/292  | 233 | E-   | E-   | 6 |
|    | 830                                                               |        | 28  | 08   | 07   |   |
|    | GO:                                                               |        | 195 | 2.66 | 1.05 | 1 |
| BP | 2000 regulation of reproductive process                           | 15/292 | /23 | E-   | E-   | 5 |
|    | 241                                                               |        | 328 | 08   | 07   |   |
|    | GO:                                                               |        | 94/ | 2.69 | 1.06 | 1 |
| BP | 0070 negative regulation of leukocyte proliferation               | 11/292 | 233 | E-   | E-   | 1 |
|    | 664                                                               |        | 28  | 08   | 07   |   |
|    | GO:                                                               |        | 95/ | 3.01 | 1.18 | 1 |
| BP | 0051 regulation of oxidoreductase activity                        | 11/292 | 233 | E-   | E-   | 1 |
|    | 341                                                               |        | 28  | 08   | 07   |   |

|    |                                                                              |        |     |      |      |   |
|----|------------------------------------------------------------------------------|--------|-----|------|------|---|
|    | GO:                                                                          |        | 56/ | 3.02 | 1.19 |   |
| BP | 0051 regulation of sensory perception of pain                                | 9/292  | 233 | E-   | E-   | 9 |
|    | 930                                                                          |        | 28  | 08   | 07   |   |
|    | GO:                                                                          |        | 118 | 3.09 | 1.21 | 1 |
| BP | 1904 epithelial cell apoptotic process                                       | 12/292 | /23 | E-   | E-   | 2 |
|    | 019                                                                          |        | 328 | 08   | 07   |   |
|    | GO:                                                                          |        | 27/ | 3.21 | 1.26 |   |
| BP | 0050 regulation of positive chemotaxis                                       | 7/292  | 233 | E-   | E-   | 7 |
|    | 926                                                                          |        | 28  | 08   | 07   |   |
|    | GO:                                                                          |        | 361 | 3.45 | 1.34 | 2 |
| BP | 1904 regulation of cation transmembrane transport                            | 20/292 | /23 | E-   | E-   | 0 |
|    | 062                                                                          |        | 328 | 08   | 07   |   |
|    | GO:                                                                          |        | 57/ | 3.55 | 1.38 |   |
| BP | 0043 regulation of macrophage activation                                     | 9/292  | 233 | E-   | E-   | 9 |
|    | 030                                                                          |        | 28  | 08   | 07   |   |
|    | GO:                                                                          |        | 57/ | 3.55 | 1.38 |   |
| BP | 0051 regulation of sensory perception                                        | 9/292  | 233 | E-   | E-   | 9 |
|    | 931                                                                          |        | 28  | 08   | 07   |   |
|    | GO:                                                                          |        | 41/ | 3.66 | 1.42 |   |
| BP | 0098 regulation of renal system process                                      | 8/292  | 233 | E-   | E-   | 8 |
|    | 801                                                                          |        | 28  | 08   | 07   |   |
|    | GO:                                                                          |        | 230 | 3.76 | 1.45 | 1 |
| BP | 0002 positive regulation of peptide secretion                                | 16/292 | /23 | E-   | E-   | 6 |
|    | 793                                                                          |        | 328 | 08   | 07   |   |
|    | GO:                                                                          |        | 58/ | 4.15 | 1.60 |   |
| BP | 0010 regulation of phospholipase activity                                    | 9/292  | 233 | E-   | E-   | 9 |
|    | 517                                                                          |        | 28  | 08   | 07   |   |
|    | GO:                                                                          |        | 99/ | 4.65 | 1.79 | 1 |
| BP | 0007 phospholipase C-activating G protein-coupled receptor signaling pathway | 11/292 | 233 | E-   | E-   | 1 |
|    | 200                                                                          |        | 28  | 08   | 07   |   |
|    | GO:                                                                          |        | 333 | 4.81 | 1.85 | 1 |
| BP | 0072 renal system development                                                | 19/292 | /23 | E-   | E-   | 9 |
|    | 001                                                                          |        | 328 | 08   | 07   |   |
|    | GO:                                                                          |        | 79/ | 5.45 | 2.09 | 1 |
| BP | 0060 regulation of lipase activity                                           | 10/292 | 233 | E-   | E-   | 0 |
|    | 191                                                                          |        | 28  | 08   | 07   |   |
|    | GO:                                                                          |        | 408 | 5.48 | 2.10 | 2 |
| BP | 0003 muscle system process                                                   | 21/292 | /23 | E-   | E-   | 1 |
|    | 012                                                                          |        | 328 | 08   | 07   |   |
|    | GO:                                                                          |        | 29/ | 5.52 | 2.11 |   |
| BP | 0060 branching involved in mammary gland duct morphogenesis                  | 7/292  | 233 | E-   | E-   | 7 |
|    | 444                                                                          |        | 28  | 08   | 07   |   |

|    |      |                                           |        |      |      |      |
|----|------|-------------------------------------------|--------|------|------|------|
|    | GO:  |                                           | 60/    | 5.64 | 2.15 |      |
| BP | 2000 | regulation of lymphocyte migration        | 9/292  | 233  | E-   | E- 9 |
|    | 401  |                                           |        | 28   | 08   | 07   |
|    | GO:  |                                           | 372    | 5.64 | 2.15 | 2    |
| BP | 0010 | positive regulation of neuron projection  | 20/292 | /23  | E-   | E- 0 |
|    | 976  | development                               |        | 328  | 08   | 07   |
|    | GO:  |                                           | 207    | 5.89 | 2.23 | 1    |
| BP | 0031 | negative regulation of cell projection    | 15/292 | /23  | E-   | E- 5 |
|    | 345  | organization                              |        | 328  | 08   | 07   |
|    | GO:  |                                           | 303    | 5.95 | 2.25 | 1    |
| BP | 0043 | regulation of GTPase activity             | 18/292 | /23  | E-   | E- 8 |
|    | 087  |                                           |        | 328  | 08   | 07   |
|    | GO:  |                                           | 80/    | 6.16 | 2.33 | 1    |
| BP | 0050 | regulation of defense response to virus   | 10/292 | 233  | E-   | E- 0 |
|    | 688  |                                           |        | 28   | 08   | 07   |
|    | GO:  |                                           | 489    | 6.51 | 2.46 | 2    |
| BP | 0034 | regulation of ion transmembrane transport | 23/292 | /23  | E-   | E- 3 |
|    | 765  |                                           |        | 328  | 08   | 07   |
|    | GO:  |                                           | 44/    | 6.56 | 2.47 |      |
| BP | 0032 | regulation of monooxygenase activity      | 8/292  | 233  | E-   | E- 8 |
|    | 768  |                                           |        | 28   | 08   | 07   |
|    | GO:  |                                           | 44/    | 6.56 | 2.47 |      |
| BP | 1902 | positive regulation of pri-miRNA          | 8/292  | 233  | E-   | E- 8 |
|    | 895  | transcription by RNA polymerase II        |        | 28   | 08   | 07   |
|    | GO:  |                                           | 81/    | 6.95 | 2.61 | 1    |
| BP | 0051 | positive regulation of nuclear division   | 10/292 | 233  | E-   | E- 0 |
|    | 785  |                                           |        | 28   | 08   | 07   |
|    | GO:  |                                           | 10/    | 7.11 | 2.66 |      |
| BP | 0035 | T-helper 1 cell cytokine production       | 5/292  | 233  | E-   | E- 5 |
|    | 744  |                                           |        | 28   | 08   | 07   |
|    | GO:  |                                           | 30/    | 7.13 | 2.66 |      |
| BP | 0002 | regulation of T cell cytokine production  | 7/292  | 233  | E-   | E- 7 |
|    | 724  |                                           |        | 28   | 08   | 07   |
|    | GO:  |                                           | 62/    | 7.57 | 2.82 |      |
| BP | 0014 | positive regulation of smooth muscle cell | 9/292  | 233  | E-   | E- 9 |
|    | 911  | migration                                 |        | 28   | 08   | 07   |
|    | GO:  |                                           | 104    | 7.79 | 2.90 | 1    |
| BP | 0045 | positive regulation of ossification       | 11/292 | /23  | E-   | E- 1 |
|    | 778  |                                           |        | 328  | 08   | 07   |
|    | GO:  |                                           | 45/    | 7.90 | 2.93 |      |
| BP | 0001 | positive regulation of cytokine-mediated  | 8/292  | 233  | E-   | E- 8 |
|    | 961  | signaling pathway                         |        | 28   | 08   | 07   |



|    |      |                                                     |        |      |      |      |
|----|------|-----------------------------------------------------|--------|------|------|------|
|    | GO:  |                                                     | 45/    | 7.90 | 2.93 |      |
| BP | 0045 | positive regulation of fatty acid metabolic process | 8/292  | 233  | E-   | E- 8 |
|    | 923  |                                                     |        | 28   | 08   | 07   |
|    | GO:  |                                                     | 417    | 7.92 | 2.93 | 2    |
| BP | 0042 | B cell activation                                   | 21/292 | /23  | E-   | E- 1 |
|    | 113  |                                                     |        | 328  | 08   | 07   |
|    | GO:  |                                                     | 183    | 8.34 | 3.08 | 1    |
| BP | 0008 | regulation of heart contraction                     | 14/292 | /23  | E-   | E- 4 |
|    | 016  |                                                     |        | 328  | 08   | 07   |
|    | GO:  |                                                     | 105    | 8.60 | 3.17 | 1    |
| BP | 0046 | regulation of alpha-beta T cell activation          | 11/292 | /23  | E-   | E- 1 |
|    | 634  |                                                     |        | 328  | 08   | 07   |
|    | GO:  |                                                     | 19/    | 8.64 | 3.17 |      |
| BP | 0002 | regulation of tolerance induction                   | 6/292  | 233  | E-   | E- 6 |
|    | 643  |                                                     |        | 28   | 08   | 07   |
|    | GO:  |                                                     | 19/    | 8.64 | 3.17 |      |
| BP | 0002 | positive regulation of T cell cytokine production   | 6/292  | 233  | E-   | E- 6 |
|    | 726  |                                                     |        | 28   | 08   | 07   |
|    | GO:  |                                                     | 184    | 8.93 | 3.27 | 1    |
| BP | 0046 | regulation of lipid biosynthetic process            | 14/292 | /23  | E-   | E- 4 |
|    | 890  |                                                     |        | 328  | 08   | 07   |
|    | GO:  |                                                     | 420    | 8.94 | 3.27 | 2    |
| BP | 0007 | muscle organ development                            | 21/292 | /23  | E-   | E- 1 |
|    | 517  |                                                     |        | 328  | 08   | 07   |
|    | GO:  |                                                     | 31/    | 9.11 | 3.30 |      |
| BP | 0002 | regulation of type 2 immune response                | 7/292  | 233  | E-   | E- 7 |
|    | 828  |                                                     |        | 28   | 08   | 07   |
|    | GO:  |                                                     | 31/    | 9.11 | 3.30 |      |
| BP | 0042 | regulation of hair cycle                            | 7/292  | 233  | E-   | E- 7 |
|    | 634  |                                                     |        | 28   | 08   | 07   |
|    | GO:  |                                                     | 31/    | 9.11 | 3.30 |      |
| BP | 0045 | negative regulation of myoblast differentiation     | 7/292  | 233  | E-   | E- 7 |
|    | 662  |                                                     |        | 28   | 08   | 07   |
|    | GO:  |                                                     | 31/    | 9.11 | 3.30 |      |
| BP | 0048 | lymph node development                              | 7/292  | 233  | E-   | E- 7 |
|    | 535  |                                                     |        | 28   | 08   | 07   |
|    | GO:  |                                                     | 130    | 9.15 | 3.31 | 1    |
| BP | 0032 | regulation of lipid transport                       | 12/292 | /23  | E-   | E- 2 |
|    | 368  |                                                     |        | 328  | 08   | 07   |
|    | GO:  |                                                     | 157    | 9.65 | 3.48 | 1    |
| BP | 0060 | calcium ion transport into cytosol                  | 13/292 | /23  | E-   | E- 3 |
|    | 402  |                                                     |        | 328  | 08   | 07   |

|    |      |                                                 |        |      |      |    |   |
|----|------|-------------------------------------------------|--------|------|------|----|---|
|    | GO:  |                                                 | 157    | 9.65 | 3.48 |    |   |
| BP | 0062 | positive regulation of small molecule           | 13/292 | /23  | E-   | E- | 1 |
|    | 013  | metabolic process                               |        | 328  | 08   | 07 | 3 |
|    | GO:  |                                                 | 64/    | 1.01 | 3.62 |    |   |
| BP | 0050 | regulation of cytokine secretion                | 9/292  | 233  | E-   | E- | 9 |
|    | 707  |                                                 |        | 28   | 07   | 07 |   |
|    | GO:  |                                                 | 132    | 1.08 | 3.89 |    | 1 |
| BP | 0010 | regulation of signaling receptor activity       | 12/292 | /23  | E-   | E- | 2 |
|    | 469  |                                                 |        | 328  | 07   | 07 |   |
|    | GO:  |                                                 | 47/    | 1.13 | 4.03 |    |   |
| BP | 0048 | macrophage chemotaxis                           | 8/292  | 233  | E-   | E- | 8 |
|    | 246  |                                                 |        | 28   | 07   | 07 |   |
|    | GO:  |                                                 | 47/    | 1.13 | 4.03 |    |   |
| BP | 2001 | regulation of extrinsic apoptotic signaling     | 8/292  | 233  | E-   | E- | 8 |
|    | 239  | pathway in absence of ligand                    |        | 28   | 07   | 07 |   |
|    | GO:  |                                                 | 65/    | 1.15 | 4.12 |    |   |
| BP | 0045 | positive regulation of mitotic nuclear division | 9/292  | 233  | E-   | E- | 9 |
|    | 840  |                                                 |        | 28   | 07   | 07 |   |
|    | GO:  |                                                 | 133    | 1.18 | 4.19 |    | 1 |
| BP | 0042 | molting cycle                                   | 12/292 | /23  | E-   | E- | 2 |
|    | 303  |                                                 |        | 328  | 07   | 07 |   |
|    | GO:  |                                                 | 133    | 1.18 | 4.19 |    | 1 |
| BP | 0042 | hair cycle                                      | 12/292 | /23  | E-   | E- | 2 |
|    | 633  |                                                 |        | 328  | 07   | 07 |   |
|    | GO:  |                                                 | 20/    | 1.22 | 4.33 |    |   |
| BP | 0010 | T cell chemotaxis                               | 6/292  | 233  | E-   | E- | 6 |
|    | 818  |                                                 |        | 28   | 07   | 07 |   |
|    | GO:  |                                                 | 20/    | 1.22 | 4.33 |    |   |
| BP | 0048 | eosinophil chemotaxis                           | 6/292  | 233  | E-   | E- | 6 |
|    | 245  |                                                 |        | 28   | 07   | 07 |   |
|    | GO:  |                                                 | 318    | 1.23 | 4.35 |    | 1 |
| BP | 0001 | kidney development                              | 18/292 | /23  | E-   | E- | 8 |
|    | 822  |                                                 |        | 328  | 07   | 07 |   |
|    | GO:  |                                                 | 354    | 1.25 | 4.42 |    | 1 |
| BP | 0050 | regulation of body fluid levels                 | 19/292 | /23  | E-   | E- | 9 |
|    | 878  |                                                 |        | 328  | 07   | 07 |   |
|    | GO:  |                                                 | 109    | 1.27 | 4.46 |    | 1 |
| BP | 0051 | release of sequestered calcium ion into         | 11/292 | /23  | E-   | E- | 1 |
|    | 209  | cytosol                                         |        | 328  | 07   | 07 | 1 |
|    | GO:  |                                                 | 252    | 1.33 | 4.67 |    | 1 |
| BP | 0045 | fat cell differentiation                        | 16/292 | /23  | E-   | E- | 6 |
|    | 444  |                                                 |        | 328  | 07   | 07 |   |

|    |                                                         |        |     |      |      |   |
|----|---------------------------------------------------------|--------|-----|------|------|---|
|    | GO:                                                     |        | 48/ | 1.34 | 4.69 |   |
| BP | 0022 ovulation cycle process                            | 8/292  | 233 | E-   | E-   | 8 |
|    | 602                                                     |        | 28  | 07   | 07   |   |
|    | GO:                                                     |        | 48/ | 1.34 | 4.69 |   |
| BP | 0032 regulation of collagen biosynthetic process        | 8/292  | 233 | E-   | E-   | 8 |
|    | 965                                                     |        | 28  | 07   | 07   |   |
|    | GO:                                                     |        | 320 | 1.35 | 4.72 |   |
| BP | 0051 maintenance of location                            | 18/292 | /23 | E-   | E-   | 1 |
|    | 235                                                     |        | 328 | 07   | 07   | 8 |
|    | GO:                                                     |        | 87/ | 1.39 | 4.83 |   |
| BP | 0034 regulation of tissue remodeling                    | 10/292 | 233 | E-   | E-   | 1 |
|    | 103                                                     |        | 28  | 07   | 07   | 0 |
|    | GO:                                                     |        | 221 | 1.39 | 4.84 |   |
| BP | 0060 heart contraction                                  | 15/292 | /23 | E-   | E-   | 1 |
|    | 047                                                     |        | 328 | 07   | 07   | 5 |
|    | GO:                                                     |        | 110 | 1.39 | 4.84 |   |
| BP | 0051 negative regulation of sequestering of calcium ion | 11/292 | /23 | E-   | E-   | 1 |
|    | 283                                                     |        | 328 | 07   | 07   | 1 |
|    | GO:                                                     |        | 33/ | 1.45 | 5.02 |   |
| BP | 0042 neutrophil activation                              | 7/292  | 233 | E-   | E-   | 7 |
|    | 119                                                     |        | 28  | 07   | 07   |   |
|    | GO:                                                     |        | 222 | 1.47 | 5.10 |   |
| BP | 0043 positive regulation of GTPase activity             | 15/292 | /23 | E-   | E-   | 1 |
|    | 547                                                     |        | 328 | 07   | 07   | 5 |
|    | GO:                                                     |        | 358 | 1.49 | 5.16 |   |
| BP | 0045 positive regulation of cell cycle                  | 19/292 | /23 | E-   | E-   | 1 |
|    | 787                                                     |        | 328 | 07   | 07   | 9 |
|    | GO:                                                     |        | 136 | 1.51 | 5.18 |   |
| BP | 0051 positive regulation of calcium ion transport       | 12/292 | /23 | E-   | E-   | 1 |
|    | 928                                                     |        | 328 | 07   | 07   | 2 |
|    | GO:                                                     |        | 136 | 1.51 | 5.18 |   |
| BP | 0097 calcium ion transmembrane import into cytosol      | 12/292 | /23 | E-   | E-   | 1 |
|    | 553                                                     |        | 328 | 07   | 07   | 2 |
|    | GO:                                                     |        | 192 | 1.51 | 5.19 |   |
| BP | 0022 negative regulation of cell-cell adhesion          | 14/292 | /23 | E-   | E-   | 1 |
|    | 408                                                     |        | 328 | 07   | 07   | 4 |
|    | GO:                                                     |        | 192 | 1.51 | 5.19 |   |
| BP | 0045 regulation of lymphocyte differentiation           | 14/292 | /23 | E-   | E-   | 1 |
|    | 619                                                     |        | 328 | 07   | 07   | 4 |
|    | GO:                                                     |        | 111 | 1.53 | 5.24 |   |
| BP | 0019 regulation of steroid metabolic process            | 11/292 | /23 | E-   | E-   | 1 |
|    | 218                                                     |        | 328 | 07   | 07   | 1 |

|    |      |                                                          |        |      |      |    |
|----|------|----------------------------------------------------------|--------|------|------|----|
|    | GO:  |                                                          | 88/    | 1.55 | 5.28 |    |
| BP | 0010 | regulation of glucose transmembrane transport            | 10/292 | 233  | E-   | E- |
|    | 827  |                                                          |        | 28   | 07   | 07 |
|    | GO:  |                                                          | 112    | 1.68 | 5.72 |    |
| BP | 0051 | regulation of sequestering of calcium ion                | 11/292 | /23  | E-   | E- |
|    | 282  |                                                          |        | 328  | 07   | 07 |
|    | GO:  |                                                          | 68/    | 1.72 | 5.86 |    |
| BP | 0002 | positive regulation of myeloid leukocyte differentiation | 9/292  | 233  | E-   | E- |
|    | 763  |                                                          |        | 28   | 07   | 07 |
|    | GO:  |                                                          | 165    | 1.73 | 5.87 |    |
| BP | 1905 | regulation of lipid localization                         | 13/292 | /23  | E-   | E- |
|    | 952  |                                                          |        | 328  | 07   | 07 |
|    | GO:  |                                                          | 34/    | 1.80 | 6.12 |    |
| BP | 0010 | positive regulation of collagen metabolic process        | 7/292  | 233  | E-   | E- |
|    | 714  |                                                          |        | 28   | 07   | 07 |
|    | GO:  |                                                          | 113    | 1.84 | 6.21 |    |
| BP | 0001 | hair follicle development                                | 11/292 | /23  | E-   | E- |
|    | 942  |                                                          |        | 328  | 07   | 07 |
|    | GO:  |                                                          | 113    | 1.84 | 6.21 |    |
| BP | 0051 | sequestering of calcium ion                              | 11/292 | /23  | E-   | E- |
|    | 208  |                                                          |        | 328  | 07   | 07 |
|    | GO:  |                                                          | 114    | 2.01 | 6.77 |    |
| BP | 0006 | smooth muscle contraction                                | 11/292 | /23  | E-   | E- |
|    | 939  |                                                          |        | 328  | 07   | 07 |
|    | GO:  |                                                          | 114    | 2.01 | 6.77 |    |
| BP | 1905 | regulation of morphogenesis of an epithelium             | 11/292 | /23  | E-   | E- |
|    | 330  |                                                          |        | 328  | 07   | 07 |
|    | GO:  |                                                          | 91/    | 2.13 | 7.16 |    |
| BP | 0032 | regulation of organic acid transport                     | 10/292 | 233  | E-   | E- |
|    | 890  |                                                          |        | 28   | 07   | 07 |
|    | GO:  |                                                          | 70/    | 2.22 | 7.46 |    |
| BP | 0030 | regulation of B cell proliferation                       | 9/292  | 233  | E-   | E- |
|    | 888  |                                                          |        | 28   | 07   | 07 |
|    | GO:  |                                                          | 331    | 2.23 | 7.46 |    |
| BP | 0018 | peptidyl-serine phosphorylation                          | 18/292 | /23  | E-   | E- |
|    | 105  |                                                          |        | 328  | 07   | 07 |
|    | GO:  |                                                          | 35/    | 2.23 | 7.46 |    |
| BP | 0050 | defense response to fungus                               | 7/292  | 233  | E-   | E- |
|    | 832  |                                                          |        | 28   | 07   | 07 |
|    | GO:  |                                                          | 22/    | 2.30 | 7.67 |    |
| BP | 0051 | regulation of hair follicle development                  | 6/292  | 233  | E-   | E- |
|    | 797  |                                                          |        | 28   | 07   | 07 |

|    |                                                            |        |     |      |      |   |
|----|------------------------------------------------------------|--------|-----|------|------|---|
|    | GO:                                                        |        | 22/ | 2.30 | 7.67 |   |
| BP | 0060 branch elongation of an epithelium                    | 6/292  | 233 | E-   | E-   | 6 |
|    | 602                                                        |        | 28  | 07   | 07   |   |
|    | GO:                                                        |        | 116 | 2.40 | 7.96 | 1 |
| BP | 0022 molting cycle process                                 | 11/292 | /23 | E-   | E-   | 1 |
|    | 404                                                        |        | 328 | 07   | 07   |   |
|    | GO:                                                        |        | 116 | 2.40 | 7.96 | 1 |
| BP | 0022 hair cycle process                                    | 11/292 | /23 | E-   | E-   | 1 |
|    | 405                                                        |        | 328 | 07   | 07   |   |
|    | GO:                                                        |        | 116 | 2.40 | 7.96 | 1 |
| BP | 0098 skin epidermis development                            | 11/292 | /23 | E-   | E-   | 1 |
|    | 773                                                        |        | 328 | 07   | 07   |   |
|    | GO:                                                        |        | 170 | 2.44 | 8.08 | 1 |
| BP | 1904 positive regulation of cation transmembrane transport | 13/292 | /23 | E-   | E-   | 3 |
|    | 064                                                        |        | 328 | 07   | 07   |   |
|    | GO:                                                        |        | 231 | 2.47 | 8.14 | 1 |
| BP | 0003 heart process                                         | 15/292 | /23 | E-   | E-   | 5 |
|    | 015                                                        |        | 328 | 07   | 07   |   |
|    | GO:                                                        |        | 52/ | 2.56 | 8.39 |   |
| BP | 0009 response to fungus                                    | 8/292  | 233 | E-   | E-   | 8 |
|    | 620                                                        |        | 28  | 07   | 07   |   |
|    | GO:                                                        |        | 52/ | 2.56 | 8.39 |   |
| BP | 0032 positive regulation of type I interferon production   | 8/292  | 233 | E-   | E-   | 8 |
|    | 481                                                        |        | 28  | 07   | 07   |   |
|    | GO:                                                        |        | 52/ | 2.56 | 8.39 |   |
| BP | 0032 positive regulation of interleukin-1 beta production  | 8/292  | 233 | E-   | E-   | 8 |
|    | 731                                                        |        | 28  | 07   | 07   |   |
|    | GO:                                                        |        | 299 | 2.60 | 8.53 | 1 |
| BP | 0007 learning or memory                                    | 17/292 | /23 | E-   | E-   | 7 |
|    | 611                                                        |        | 328 | 07   | 07   |   |
|    | GO:                                                        |        | 36/ | 2.74 | 8.95 |   |
| BP | 0010 vascular endothelial growth factor production         | 7/292  | 233 | E-   | E-   | 7 |
|    | 573                                                        |        | 28  | 07   | 07   |   |
|    | GO:                                                        |        | 36/ | 2.74 | 8.95 |   |
| BP | 1902 positive regulation of neutrophil migration           | 7/292  | 233 | E-   | E-   | 7 |
|    | 624                                                        |        | 28  | 07   | 07   |   |
|    | GO:                                                        |        | 336 | 2.78 | 9.07 | 1 |
| BP | 0050 cognition                                             | 18/292 | /23 | E-   | E-   | 8 |
|    | 890                                                        |        | 328 | 07   | 07   |   |
|    | GO:                                                        |        | 118 | 2.86 | 9.31 | 1 |
| BP | 0021 glial cell development                                | 11/292 | /23 | E-   | E-   | 1 |
|    | 782                                                        |        | 328 | 07   | 07   |   |

|    |      |                                                                        |        |      |      |    |  |   |
|----|------|------------------------------------------------------------------------|--------|------|------|----|--|---|
|    | GO:  |                                                                        | 94/    | 2.90 | 9.42 |    |  |   |
| BP | 1904 | regulation of epithelial cell apoptotic process                        | 10/292 | 233  | E-   | E- |  | 1 |
|    | 035  |                                                                        |        | 28   | 07   | 07 |  | 0 |
|    | GO:  |                                                                        | 53/    | 2.98 | 9.61 |    |  |   |
| BP | 0002 | positive regulation of B cell mediated immunity                        | 8/292  | 233  | E-   | E- |  | 8 |
|    | 714  |                                                                        |        | 28   | 07   | 07 |  |   |
|    | GO:  |                                                                        | 53/    | 2.98 | 9.61 |    |  |   |
| BP | 0002 | positive regulation of immunoglobulin mediated immune response         | 8/292  | 233  | E-   | E- |  | 8 |
|    | 891  |                                                                        |        | 28   | 07   | 07 |  |   |
|    | GO:  |                                                                        | 53/    | 2.98 | 9.61 |    |  |   |
| BP | 0010 | negative regulation of endothelial cell migration                      | 8/292  | 233  | E-   | E- |  | 8 |
|    | 596  |                                                                        |        | 28   | 07   | 07 |  |   |
|    | GO:  |                                                                        | 53/    | 2.98 | 9.61 |    |  |   |
| BP | 0051 | regulation of amino acid transport                                     | 8/292  | 233  | E-   | E- |  | 8 |
|    | 955  |                                                                        |        | 28   | 07   | 07 |  |   |
|    | GO:  |                                                                        | 145    | 3.04 | 9.78 |    |  |   |
| BP | 0072 | kidney epithelium development                                          | 12/292 | /23  | E-   | E- |  | 1 |
|    | 073  |                                                                        |        | 328  | 07   | 07 |  | 2 |
|    | GO:  |                                                                        | 235    | 3.07 | 9.88 |    |  |   |
| BP | 0090 | regulation of peptide hormone secretion                                | 15/292 | /23  | E-   | E- |  | 1 |
|    | 276  |                                                                        |        | 328  | 07   | 07 |  | 5 |
|    | GO:  |                                                                        | 23/    | 3.08 | 9.90 |    |  |   |
| BP | 0002 | negative regulation of cytokine production involved in immune response | 6/292  | 233  | E-   | E- |  | 6 |
|    | 719  |                                                                        |        | 28   | 07   | 07 |  |   |
|    | GO:  |                                                                        | 73/    | 3.21 | 1.03 |    |  |   |
| BP | 0042 | negative regulation of T cell proliferation                            | 9/292  | 233  | E-   | E- |  | 9 |
|    | 130  |                                                                        |        | 28   | 07   | 06 |  |   |
|    | GO:  |                                                                        | 54/    | 3.46 | 1.10 |    |  |   |
| BP | 0034 | heterotypic cell-cell adhesion                                         | 8/292  | 233  | E-   | E- |  | 8 |
|    | 113  |                                                                        |        | 28   | 07   | 06 |  |   |
|    | GO:  |                                                                        | 54/    | 3.46 | 1.10 |    |  |   |
| BP | 0045 | positive regulation of glial cell differentiation                      | 8/292  | 233  | E-   | E- |  | 8 |
|    | 687  |                                                                        |        | 28   | 07   | 06 |  |   |
|    | GO:  |                                                                        | 54/    | 3.46 | 1.10 |    |  |   |
| BP | 1904 | regulation of vascular associated smooth muscle cell proliferation     | 8/292  | 233  | E-   | E- |  | 8 |
|    | 705  |                                                                        |        | 28   | 07   | 06 |  |   |
|    | GO:  |                                                                        | 54/    | 3.46 | 1.10 |    |  |   |
| BP | 1990 | vascular associated smooth muscle cell proliferation                   | 8/292  | 233  | E-   | E- |  | 8 |
|    | 874  |                                                                        |        | 28   | 07   | 06 |  |   |
|    | GO:  |                                                                        | 13/    | 3.52 | 1.11 |    |  |   |
| BP | 0002 | T cell tolerance induction                                             | 5/292  | 233  | E-   | E- |  | 5 |
|    | 517  |                                                                        |        | 28   | 07   | 06 |  |   |

|    |                                                                                   |        |     |      |      |   |
|----|-----------------------------------------------------------------------------------|--------|-----|------|------|---|
|    | GO:                                                                               |        | 13/ | 3.52 | 1.11 |   |
| BP | 0031 positive regulation of heat generation                                       | 5/292  | 233 | E-   | E-   | 5 |
|    | 652                                                                               |        | 28  | 07   | 06   |   |
|    | GO:                                                                               |        | 13/ | 3.52 | 1.11 |   |
| BP | 0045 positive regulation of epidermal growth factor-activated receptor activity   | 5/292  | 233 | E-   | E-   | 5 |
|    | 741                                                                               |        | 28  | 07   | 06   |   |
|    | GO:                                                                               |        | 207 | 3.81 | 1.20 | 1 |
| BP | 0035 organ growth                                                                 | 14/292 | /23 | E-   | E-   | 4 |
|    | 265                                                                               |        | 328 | 07   | 06   |   |
|    | GO:                                                                               |        | 177 | 3.89 | 1.23 | 1 |
| BP | 0060 cytosolic calcium ion transport                                              | 13/292 | /23 | E-   | E-   | 3 |
|    | 401                                                                               |        | 328 | 07   | 06   |   |
|    | GO:                                                                               |        | 97/ | 3.90 | 1.23 | 1 |
| BP | 0120 positive regulation of cold-induced thermogenesis                            | 10/292 | 233 | E-   | E-   | 0 |
|    | 162                                                                               |        | 28  | 07   | 06   |   |
|    | GO:                                                                               |        | 273 | 3.92 | 1.23 | 1 |
| BP | 0042 glucose homeostasis                                                          | 16/292 | /23 | E-   | E-   | 6 |
|    | 593                                                                               |        | 328 | 07   | 06   |   |
|    | GO:                                                                               |        | 55/ | 4.00 | 1.25 |   |
| BP | 0003 regulation of systemic arterial blood pressure mediated by a chemical signal | 8/292  | 233 | E-   | E-   | 8 |
|    | 044                                                                               |        | 28  | 07   | 06   |   |
|    | GO:                                                                               |        | 55/ | 4.00 | 1.25 |   |
| BP | 2000 regulation of endothelial cell apoptotic process                             | 8/292  | 233 | E-   | E-   | 8 |
|    | 351                                                                               |        | 28  | 07   | 06   |   |
|    | GO:                                                                               |        | 208 | 4.04 | 1.26 | 1 |
| BP | 0001 response to hypoxia                                                          | 14/292 | /23 | E-   | E-   | 4 |
|    | 666                                                                               |        | 328 | 07   | 06   |   |
|    | GO:                                                                               |        | 24/ | 4.07 | 1.27 |   |
| BP | 0070 interleukin-1-mediated signaling pathway                                     | 6/292  | 233 | E-   | E-   | 6 |
|    | 498                                                                               |        | 28  | 07   | 06   |   |
|    | GO:                                                                               |        | 24/ | 4.07 | 1.27 |   |
| BP | 0072 eosinophil migration                                                         | 6/292  | 233 | E-   | E-   | 6 |
|    | 677                                                                               |        | 28  | 07   | 06   |   |
|    | GO:                                                                               |        | 149 | 4.08 | 1.27 | 1 |
| BP | 0046 female sex differentiation                                                   | 12/292 | /23 | E-   | E-   | 2 |
|    | 660                                                                               |        | 328 | 07   | 06   |   |
|    | GO:                                                                               |        | 345 | 4.10 | 1.27 | 1 |
| BP | 0002 immune response-regulating signaling pathway                                 | 18/292 | /23 | E-   | E-   | 8 |
|    | 764                                                                               |        | 328 | 07   | 06   |   |
|    | GO:                                                                               |        | 274 | 4.12 | 1.28 | 1 |
| BP | 0033 carbohydrate homeostasis                                                     | 16/292 | /23 | E-   | E-   | 6 |
|    | 500                                                                               |        | 328 | 07   | 06   |   |

|    |      |                                                                                  |        |      |      |      |  |  |   |
|----|------|----------------------------------------------------------------------------------|--------|------|------|------|--|--|---|
|    | GO:  |                                                                                  | 209    | 4.28 | 1.32 |      |  |  | 1 |
| BP | 0043 | regulation of cysteine-type endopeptidase activity involved in apoptotic process | 14/292 | /23  | E-   | E-   |  |  | 4 |
|    | 281  |                                                                                  |        | 328  | 07   | 06   |  |  |   |
|    | GO:  |                                                                                  |        | 98/  | 4.30 | 1.33 |  |  | 1 |
| BP | 0060 | SMAD protein signal transduction                                                 | 10/292 | 233  | E-   | E-   |  |  | 0 |
|    | 395  |                                                                                  |        | 28   | 07   | 06   |  |  |   |
|    | GO:  |                                                                                  |        | 123  | 4.36 | 1.35 |  |  | 1 |
| BP | 0002 | sprouting angiogenesis                                                           | 11/292 | /23  | E-   | E-   |  |  | 1 |
|    | 040  |                                                                                  |        | 328  | 07   | 06   |  |  |   |
|    | GO:  |                                                                                  |        | 76/  | 4.56 | 1.41 |  |  |   |
| BP | 0050 | cytokine secretion                                                               | 9/292  | 233  | E-   | E-   |  |  | 9 |
|    | 663  |                                                                                  |        | 28   | 07   | 06   |  |  |   |
|    | GO:  |                                                                                  |        | 56/  | 4.62 | 1.42 |  |  |   |
| BP | 1902 | regulation of pri-miRNA transcription by RNA polymerase II                       | 8/292  | 233  | E-   | E-   |  |  | 8 |
|    | 893  |                                                                                  |        | 28   | 07   | 06   |  |  |   |
|    | GO:  |                                                                                  |        | 464  | 4.64 | 1.43 |  |  | 2 |
| BP | 0042 | defense response to bacterium                                                    | 21/292 | /23  | E-   | E-   |  |  | 1 |
|    | 742  |                                                                                  |        | 328  | 07   | 06   |  |  |   |
|    | GO:  |                                                                                  |        | 39/  | 4.89 | 1.50 |  |  |   |
| BP | 0033 | myeloid cell apoptotic process                                                   | 7/292  | 233  | E-   | E-   |  |  | 7 |
|    | 028  |                                                                                  |        | 28   | 07   | 06   |  |  |   |
|    | GO:  |                                                                                  |        | 39/  | 4.89 | 1.50 |  |  |   |
| BP | 0036 | granulocyte activation                                                           | 7/292  | 233  | E-   | E-   |  |  | 7 |
|    | 230  |                                                                                  |        | 28   | 07   | 06   |  |  |   |
|    | GO:  |                                                                                  |        | 125  | 5.13 | 1.57 |  |  | 1 |
| BP | 0043 | positive regulation of I-kappaB kinase/NF-kappaB signaling                       | 11/292 | /23  | E-   | E-   |  |  | 1 |
|    | 123  |                                                                                  |        | 328  | 07   | 06   |  |  |   |
|    | GO:  |                                                                                  |        | 100  | 5.19 | 1.58 |  |  | 1 |
| BP | 0046 | positive regulation of lipid biosynthetic process                                | 10/292 | /23  | E-   | E-   |  |  | 0 |
|    | 889  |                                                                                  |        | 328  | 07   | 06   |  |  |   |
|    | GO:  |                                                                                  |        | 57/  | 5.32 | 1.62 |  |  |   |
| BP | 0032 | collagen biosynthetic process                                                    | 8/292  | 233  | E-   | E-   |  |  | 8 |
|    | 964  |                                                                                  |        | 28   | 07   | 06   |  |  |   |
|    | GO:  |                                                                                  |        | 57/  | 5.32 | 1.62 |  |  |   |
| BP | 0071 | regulation of granulocyte chemotaxis                                             | 8/292  | 233  | E-   | E-   |  |  | 8 |
|    | 622  |                                                                                  |        | 28   | 07   | 06   |  |  |   |
|    | GO:  |                                                                                  |        | 315  | 5.41 | 1.64 |  |  | 1 |
| BP | 0007 | sex differentiation                                                              | 17/292 | /23  | E-   | E-   |  |  | 7 |
|    | 548  |                                                                                  |        | 328  | 07   | 06   |  |  |   |
|    | GO:  |                                                                                  |        | 14/  | 5.42 | 1.64 |  |  |   |
| BP | 0010 | positive regulation of T cell chemotaxis                                         | 5/292  | 233  | E-   | E-   |  |  | 5 |
|    | 820  |                                                                                  |        | 28   | 07   | 06   |  |  |   |



|    |                                                    |        |     |      |      |   |
|----|----------------------------------------------------|--------|-----|------|------|---|
|    | GO:                                                |        | 14/ | 5.42 | 1.64 |   |
| BP | 0035 positive regulation of renal sodium excretion | 5/292  | 233 | E-   | E-   | 5 |
|    | 815                                                |        | 28  | 07   | 06   |   |
|    | GO:                                                |        | 126 | 5.56 | 1.68 | 1 |
| BP | 0007 digestion                                     | 11/292 | /23 | E-   | E-   | 1 |
|    | 586                                                |        | 328 | 07   | 06   |   |
|    | GO:                                                |        | 126 | 5.56 | 1.68 | 1 |
| BP | 1901 positive regulation of neuron death           | 11/292 | /23 | E-   | E-   | 1 |
|    | 216                                                |        | 328 | 07   | 06   |   |
|    | GO:                                                |        | 78/ | 5.71 | 1.71 |   |
| BP | 0019 regulation of vasoconstriction                | 9/292  | 233 | E-   | E-   | 9 |
|    | 229                                                |        | 28  | 07   | 06   |   |
|    | GO:                                                |        | 78/ | 5.71 | 1.71 |   |
| BP | 0070 regulation of lymphocyte apoptotic process    | 9/292  | 233 | E-   | E-   | 9 |
|    | 228                                                |        | 28  | 07   | 06   |   |
|    | GO:                                                |        | 78/ | 5.71 | 1.71 |   |
| BP | 1903 positive regulation of response to wounding   | 9/292  | 233 | E-   | E-   | 9 |
|    | 036                                                |        | 28  | 07   | 06   |   |
|    | GO: regulation of transmembrane receptor           |        | 247 | 5.81 | 1.74 | 1 |
| BP | 0090 protein serine/threonine kinase signaling     | 15/292 | /23 | E-   | E-   | 5 |
|    | 092 pathway                                        |        | 328 | 07   | 06   |   |
|    | GO:                                                |        | 40/ | 5.86 | 1.75 |   |
| BP | 0046 regulation of activated T cell proliferation  | 7/292  | 233 | E-   | E-   | 7 |
|    | 006                                                |        | 28  | 07   | 06   |   |
|    | GO:                                                |        | 58/ | 6.10 | 1.82 |   |
| BP | 0061 pri-miRNA transcription by RNA polymerase     | 8/292  | 233 | E-   | E-   | 8 |
|    | 614 II                                             |        | 28  | 07   | 06   |   |
|    | GO:                                                |        | 58/ | 6.10 | 1.82 |   |
| BP | 0072 endothelial cell apoptotic process            | 8/292  | 233 | E-   | E-   | 8 |
|    | 577                                                |        | 28  | 07   | 06   |   |
|    | GO:                                                |        | 472 | 6.13 | 1.82 | 2 |
| BP | 0045 positive regulation of neuron differentiation | 21/292 | /23 | E-   | E-   | 1 |
|    | 666                                                |        | 328 | 07   | 06   |   |
|    | GO:                                                |        | 102 | 6.25 | 1.86 | 1 |
| BP | 0070 lymphocyte apoptotic process                  | 10/292 | /23 | E-   | E-   | 0 |
|    | 227                                                |        | 328 | 07   | 06   |   |
|    | GO:                                                |        | 357 | 6.73 | 2.00 | 1 |
| BP | 0018 peptidyl-serine modification                  | 18/292 | /23 | E-   | E-   | 8 |
|    | 209                                                |        | 328 | 07   | 06   |   |
|    | GO:                                                |        | 26/ | 6.81 | 2.01 |   |
| BP | 0007 copulation                                    | 6/292  | 233 | E-   | E-   | 6 |
|    | 620                                                |        | 28  | 07   | 06   |   |

|    |                                                                 |        |     |      |      |   |
|----|-----------------------------------------------------------------|--------|-----|------|------|---|
|    | GO:                                                             |        | 26/ | 6.81 | 2.01 |   |
| BP | 0031 animal organ regeneration                                  | 6/292  | 233 | E-   | E-   | 6 |
|    | 100                                                             |        | 28  | 07   | 06   |   |
|    | GO:                                                             |        | 26/ | 6.81 | 2.01 |   |
| BP | 0042 positive regulation of activated T cell proliferation      | 6/292  | 233 | E-   | E-   | 6 |
|    | 104                                                             |        | 28  | 07   | 06   |   |
|    | GO:                                                             |        | 26/ | 6.81 | 2.01 |   |
| BP | 0045 positive regulation of fatty acid biosynthetic process     | 6/292  | 233 | E-   | E-   | 6 |
|    | 723                                                             |        | 28  | 07   | 06   |   |
|    | GO:                                                             |        | 103 | 6.85 | 2.02 | 1 |
| BP | 0010 regulation of calcium ion transport into cytosol           | 10/292 | /23 | E-   | E-   | 0 |
|    | 522                                                             |        | 328 | 07   | 06   |   |
|    | GO:                                                             |        | 80/ | 7.11 | 2.08 |   |
| BP | 0038 signal transduction in absence of ligand                   | 9/292  | 233 | E-   | E-   | 9 |
|    | 034                                                             |        | 28  | 07   | 06   |   |
|    | GO:                                                             |        | 80/ | 7.11 | 2.08 |   |
| BP | 0097 extrinsic apoptotic signaling pathway in absence of ligand | 9/292  | 233 | E-   | E-   | 9 |
|    | 192                                                             |        | 28  | 07   | 06   |   |
|    | GO:                                                             |        | 218 | 7.11 | 2.08 | 1 |
| BP | 0048 response to steroid hormone                                | 14/292 | /23 | E-   | E-   | 4 |
|    | 545                                                             |        | 328 | 07   | 06   |   |
|    | GO:                                                             |        | 478 | 7.51 | 2.20 | 2 |
| BP | 0031 positive regulation of cell projection organization        | 21/292 | /23 | E-   | E-   | 1 |
|    | 346                                                             |        | 328 | 07   | 06   |   |
|    | GO:                                                             |        | 158 | 7.66 | 2.24 | 1 |
| BP | 0051 negative regulation of lymphocyte activation               | 12/292 | /23 | E-   | E-   | 2 |
|    | 250                                                             |        | 328 | 07   | 06   |   |
|    | GO:                                                             |        | 60/ | 7.97 | 2.32 |   |
| BP | 0070 T cell apoptotic process                                   | 8/292  | 233 | E-   | E-   | 8 |
|    | 231                                                             |        | 28  | 07   | 06   |   |
|    | GO:                                                             |        | 60/ | 7.97 | 2.32 |   |
| BP | 1905 macrophage migration                                       | 8/292  | 233 | E-   | E-   | 8 |
|    | 517                                                             |        | 28  | 07   | 06   |   |
|    | GO:                                                             |        | 15/ | 8.05 | 2.34 |   |
| BP | 0035 T-helper 2 cell cytokine production                        | 5/292  | 233 | E-   | E-   | 5 |
|    | 745                                                             |        | 28  | 07   | 06   |   |
|    | GO:                                                             |        | 105 | 8.19 | 2.38 | 1 |
| BP | 1905 positive regulation of lipid localization                  | 10/292 | /23 | E-   | E-   | 0 |
|    | 954                                                             |        | 328 | 07   | 06   |   |
|    | GO:                                                             |        | 131 | 8.22 | 2.38 | 1 |
| BP | 0002 regulation of myeloid leukocyte differentiation            | 11/292 | /23 | E-   | E-   | 1 |
|    | 761                                                             |        | 328 | 07   | 06   |   |

|    |                                                        |        |     |      |      |   |
|----|--------------------------------------------------------|--------|-----|------|------|---|
|    | GO:                                                    |        | 254 | 8.26 | 2.39 |   |
| BP | 0090 positive regulation of cell cycle process         | 15/292 | /23 | E-   | E-   | 1 |
|    | 068                                                    |        | 328 | 07   | 06   | 5 |
|    | GO:                                                    |        | 27/ | 8.67 | 2.49 |   |
| BP | 0010 macrophage derived foam cell differentiation      | 6/292  | 233 | E-   | E-   | 6 |
|    | 742                                                    |        | 28  | 07   | 06   |   |
|    | GO:                                                    |        | 27/ | 8.67 | 2.49 |   |
| BP | 0048 immunoglobulin secretion                          | 6/292  | 233 | E-   | E-   | 6 |
|    | 305                                                    |        | 28  | 07   | 06   |   |
|    | GO:                                                    |        | 27/ | 8.67 | 2.49 |   |
| BP | 0071 positive regulation of mononuclear cell migration | 6/292  | 233 | E-   | E-   | 6 |
|    | 677                                                    |        | 28  | 07   | 06   |   |
|    | GO:                                                    |        | 27/ | 8.67 | 2.49 |   |
| BP | 0090 positive regulation of neutrophil chemotaxis      | 6/292  | 233 | E-   | E-   | 6 |
|    | 023                                                    |        | 28  | 07   | 06   |   |
|    | GO:                                                    |        | 160 | 8.76 | 2.51 | 1 |
| BP | 0007 regulation of mitotic nuclear division            | 12/292 | /23 | E-   | E-   | 2 |
|    | 088                                                    |        | 328 | 07   | 06   |   |
|    | GO:                                                    |        | 160 | 8.76 | 2.51 | 1 |
| BP | 0051 regulation of cell division                       | 12/292 | /23 | E-   | E-   | 2 |
|    | 302                                                    |        | 328 | 07   | 06   |   |
|    | GO:                                                    |        | 82/ | 8.79 | 2.51 |   |
| BP | 0032 positive regulation of lipid transport            | 9/292  | 233 | E-   | E-   | 9 |
|    | 370                                                    |        | 28  | 07   | 06   |   |
|    | GO:                                                    |        | 61/ | 9.07 | 2.59 |   |
| BP | 0032 positive regulation of interleukin-1 production   | 8/292  | 233 | E-   | E-   | 8 |
|    | 732                                                    |        | 28  | 07   | 06   |   |
|    | GO:                                                    |        | 61/ | 9.07 | 2.59 |   |
| BP | 0042 ovulation cycle                                   | 8/292  | 233 | E-   | E-   | 8 |
|    | 698                                                    |        | 28  | 07   | 06   |   |
|    | GO:                                                    |        | 257 | 9.58 | 2.73 | 1 |
| BP | 0051 stress-activated MAPK cascade                     | 15/292 | /23 | E-   | E-   | 5 |
|    | 403                                                    |        | 328 | 07   | 06   |   |
|    | GO:                                                    |        | 43/ | 9.82 | 2.79 |   |
| BP | 0032 interleukin-17 production                         | 7/292  | 233 | E-   | E-   | 7 |
|    | 620                                                    |        | 28  | 07   | 06   |   |
|    | GO:                                                    |        | 43/ | 9.82 | 2.79 |   |
| BP | 0070 regulation of T cell apoptotic process            | 7/292  | 233 | E-   | E-   | 7 |
|    | 232                                                    |        | 28  | 07   | 06   |   |
|    | GO:                                                    |        | 134 | 1.03 | 2.92 | 1 |
| BP | 0002 negative regulation of immune effector process    | 11/292 | /23 | E-   | E-   | 1 |
|    | 698                                                    |        | 328 | 06   | 06   | 1 |

|    |                                                  |        |     |      |      |   |
|----|--------------------------------------------------|--------|-----|------|------|---|
|    | GO:                                              |        | 84/ | 1.08 | 3.06 |   |
| BP | 0051 response to glucocorticoid                  | 9/292  | 233 | E-   | E-   | 9 |
|    | 384                                              |        | 28  | 06   | 06   |   |
|    | GO:                                              |        | 28/ | 1.09 | 3.08 |   |
| BP | 0060 branching involved in salivary gland        | 6/292  | 233 | E-   | E-   | 6 |
|    | 445 morphogenesis                                |        | 28  | 06   | 06   |   |
|    | GO:                                              |        | 28/ | 1.09 | 3.08 |   |
| BP | 0090 foam cell differentiation                   | 6/292  | 233 | E-   | E-   | 6 |
|    | 077                                              |        | 28  | 06   | 06   |   |
|    | GO:                                              |        | 44/ | 1.15 | 3.24 |   |
| BP | 0043 regulation of vascular permeability         | 7/292  | 233 | E-   | E-   | 7 |
|    | 114                                              |        | 28  | 06   | 06   |   |
|    | GO:                                              |        | 44/ | 1.15 | 3.24 |   |
| BP | 0045 positive regulation of heart contraction    | 7/292  | 233 | E-   | E-   | 7 |
|    | 823                                              |        | 28  | 06   | 06   |   |
|    | GO:                                              |        | 44/ | 1.15 | 3.24 |   |
| BP | 0050 regulation of defense response to virus by  | 7/292  | 233 | E-   | E-   | 7 |
|    | 691 host                                         |        | 28  | 06   | 06   |   |
|    | GO:                                              |        | 16/ | 1.16 | 3.24 |   |
| BP | 0042 vitamin D metabolic process                 | 5/292  | 233 | E-   | E-   | 5 |
|    | 359                                              |        | 28  | 06   | 06   |   |
|    | GO:                                              |        | 16/ | 1.16 | 3.24 |   |
| BP | 0043 penile erection                             | 5/292  | 233 | E-   | E-   | 5 |
|    | 084                                              |        | 28  | 06   | 06   |   |
|    | GO:                                              |        | 63/ | 1.17 | 3.26 |   |
| BP | 0045 regulation of myoblast differentiation      | 8/292  | 233 | E-   | E-   | 8 |
|    | 661                                              |        | 28  | 06   | 06   |   |
|    | GO:                                              |        | 262 | 1.22 | 3.40 |   |
| BP | 0002 immunoglobulin production                   | 15/292 | /23 | E-   | E-   | 1 |
|    | 377                                              |        | 328 | 06   | 06   | 5 |
|    | GO:                                              |        | 298 | 1.25 | 3.49 |   |
| BP | 0006 muscle contraction                          | 16/292 | /23 | E-   | E-   | 1 |
|    | 936                                              |        | 328 | 06   | 06   | 6 |
|    | GO:                                              |        | 229 | 1.28 | 3.56 |   |
| BP | 0030 insulin secretion                           | 14/292 | /23 | E-   | E-   | 1 |
|    | 073                                              |        | 328 | 06   | 06   | 4 |
|    | GO:                                              |        | 374 | 1.31 | 3.64 |   |
| BP | 0044 symbiotic process                           | 18/292 | /23 | E-   | E-   | 1 |
|    | 403                                              |        | 328 | 06   | 06   | 8 |
|    | GO:                                              |        | 45/ | 1.35 | 3.75 |   |
| BP | 0030 positive regulation of B cell proliferation | 7/292  | 233 | E-   | E-   | 7 |
|    | 890                                              |        | 28  | 06   | 06   |   |

|    |                                                                   |        |     |      |      |   |
|----|-------------------------------------------------------------------|--------|-----|------|------|---|
|    | GO:                                                               |        | 29/ | 1.36 | 3.76 |   |
| BP | 0031 T cell costimulation                                         | 6/292  | 233 | E-   | E-   | 6 |
|    | 295                                                               |        | 28  | 06   | 06   |   |
|    | GO:                                                               |        | 29/ | 1.36 | 3.76 |   |
| BP | 0043 positive regulation of macrophage activation                 | 6/292  | 233 | E-   | E-   | 6 |
|    | 032                                                               |        | 28  | 06   | 06   |   |
|    | GO:                                                               |        | 29/ | 1.36 | 3.76 |   |
| BP | 0071 positive regulation of granulocyte chemotaxis                | 6/292  | 233 | E-   | E-   | 6 |
|    | 624                                                               |        | 28  | 06   | 06   |   |
|    | GO:                                                               |        | 111 | 1.37 | 3.77 | 1 |
| BP | 0030 osteoclast differentiation                                   | 10/292 | /23 | E-   | E-   | 0 |
|    | 316                                                               |        | 328 | 06   | 06   |   |
|    | GO:                                                               |        | 111 | 1.37 | 3.77 | 1 |
| BP | 0032 collagen metabolic process                                   | 10/292 | /23 | E-   | E-   | 0 |
|    | 963                                                               |        | 328 | 06   | 06   |   |
|    | GO:                                                               |        | 111 | 1.37 | 3.77 | 1 |
| BP | 1904 glucose transmembrane transport                              | 10/292 | /23 | E-   | E-   | 0 |
|    | 659                                                               |        | 328 | 06   | 06   |   |
|    | GO:                                                               |        | 301 | 1.43 | 3.92 | 1 |
| BP | 0048 rhythmic process                                             | 16/292 | /23 | E-   | E-   | 6 |
|    | 511                                                               |        | 328 | 06   | 06   |   |
|    | GO:                                                               |        | 112 | 1.49 | 4.08 | 1 |
| BP | 0008 hexose transmembrane transport                               | 10/292 | /23 | E-   | E-   | 0 |
|    | 645                                                               |        | 328 | 06   | 06   |   |
|    | GO:                                                               |        | 65/ | 1.49 | 4.08 | 1 |
| BP | 0060 pathway-restricted SMAD protein phosphorylation              | 8/292  | 233 | E-   | E-   | 8 |
|    | 389                                                               |        | 28  | 06   | 06   |   |
|    | GO:                                                               |        | 169 | 1.56 | 4.28 | 1 |
| BP | 0032 positive regulation of stress-activated MAPK cascade         | 12/292 | /23 | E-   | E-   | 2 |
|    | 874                                                               |        | 328 | 06   | 06   |   |
|    | GO:                                                               |        | 46/ | 1.58 | 4.31 |   |
| BP | 2000 regulation of T cell migration                               | 7/292  | 233 | E-   | E-   | 7 |
|    | 404                                                               |        | 28  | 06   | 06   |   |
|    | GO:                                                               |        | 88/ | 1.60 | 4.35 |   |
| BP | 0002 B cell activation involved in immune response                | 9/292  | 233 | E-   | E-   | 9 |
|    | 312                                                               |        | 28  | 06   | 06   |   |
|    | GO:                                                               |        | 88/ | 1.60 | 4.35 |   |
| BP | 0031 response to corticosteroid                                   | 9/292  | 233 | E-   | E-   | 9 |
|    | 960                                                               |        | 28  | 06   | 06   |   |
|    | GO:                                                               |        | 88/ | 1.60 | 4.35 |   |
| BP | 0062 regulation of pattern recognition receptor signaling pathway | 9/292  | 233 | E-   | E-   | 9 |
|    | 207                                                               |        | 28  | 06   | 06   |   |

|    |      |                                                                          |        |     |      |      |   |
|----|------|--------------------------------------------------------------------------|--------|-----|------|------|---|
|    | GO:  |                                                                          |        | 88/ | 1.60 | 4.35 |   |
| BP | 1900 | positive regulation of protein localization to nucleus                   | 9/292  | 233 | E-   | E-   | 9 |
|    | 182  |                                                                          |        | 28  | 06   | 06   |   |
|    | GO:  |                                                                          |        | 234 | 1.65 | 4.47 | 1 |
| BP | 0036 | response to decreased oxygen levels                                      | 14/292 | /23 | E-   | E-   | 4 |
|    | 293  |                                                                          |        | 328 | 06   | 06   |   |
|    | GO:  |                                                                          |        | 234 | 1.65 | 4.47 | 1 |
| BP | 2000 | regulation of cysteine-type endopeptidase activity                       | 14/292 | /23 | E-   | E-   | 4 |
|    | 116  |                                                                          |        | 328 | 06   | 06   |   |
|    | GO:  |                                                                          |        | 342 | 1.68 | 4.52 | 1 |
| BP | 0002 | immune response-regulating cell surface receptor signaling pathway       | 17/292 | /23 | E-   | E-   | 7 |
|    | 768  |                                                                          |        | 328 | 06   | 06   |   |
|    | GO:  |                                                                          |        | 66/ | 1.68 | 4.52 |   |
| BP | 0032 | interleukin-2 production                                                 | 8/292  | 233 | E-   | E-   | 8 |
|    | 623  |                                                                          |        | 28  | 06   | 06   |   |
|    | GO:  |                                                                          |        | 30/ | 1.68 | 4.54 |   |
| BP | 0001 | organ induction                                                          | 6/292  | 233 | E-   | E-   | 6 |
|    | 759  |                                                                          |        | 28  | 06   | 06   |   |
|    | GO:  |                                                                          |        | 114 | 1.75 | 4.71 | 1 |
| BP | 0015 | monosaccharide transmembrane transport                                   | 10/292 | /23 | E-   | E-   | 0 |
|    | 749  |                                                                          |        | 328 | 06   | 06   |   |
|    | GO:  |                                                                          |        | 171 | 1.77 | 4.75 | 1 |
| BP | 0045 | positive regulation of mitotic cell cycle                                | 12/292 | /23 | E-   | E-   | 2 |
|    | 931  |                                                                          |        | 328 | 06   | 06   |   |
|    | GO:  |                                                                          |        | 171 | 1.77 | 4.75 | 1 |
| BP | 0070 | positive regulation of stress-activated protein kinase signaling cascade | 12/292 | /23 | E-   | E-   | 2 |
|    | 304  |                                                                          |        | 328 | 06   | 06   |   |
|    | GO:  |                                                                          |        | 236 | 1.83 | 4.89 | 1 |
| BP | 0008 | gonad development                                                        | 14/292 | /23 | E-   | E-   | 4 |
|    | 406  |                                                                          |        | 328 | 06   | 06   |   |
|    | GO:  |                                                                          |        | 47/ | 1.84 | 4.89 |   |
| BP | 0001 | regulation of systemic arterial blood pressure by hormone                | 7/292  | 233 | E-   | E-   | 7 |
|    | 990  |                                                                          |        | 28  | 06   | 06   |   |
|    | GO:  |                                                                          |        | 47/ | 1.84 | 4.89 |   |
| BP | 0010 | positive regulation of epithelial to mesenchymal transition              | 7/292  | 233 | E-   | E-   | 7 |
|    | 718  |                                                                          |        | 28  | 06   | 06   |   |
|    | GO:  |                                                                          |        | 47/ | 1.84 | 4.89 |   |
| BP | 0043 | negative regulation of I-kappaB kinase/NF-kappaB signaling               | 7/292  | 233 | E-   | E-   | 7 |
|    | 124  |                                                                          |        | 28  | 06   | 06   |   |
|    | GO:  |                                                                          |        | 115 | 1.90 | 5.04 | 1 |
| BP | 0008 | female gonad development                                                 | 10/292 | /23 | E-   | E-   | 0 |
|    | 585  |                                                                          |        | 328 | 06   | 06   |   |

|    |                                                  |        |     |      |      |   |
|----|--------------------------------------------------|--------|-----|------|------|---|
|    | GO:                                              |        | 115 | 1.90 | 5.04 | 1 |
| BP | 0034 carbohydrate transmembrane transport        | 10/292 | /23 | E-   | E-   | 0 |
|    | 219                                              |        | 328 | 06   | 06   |   |
|    | GO: positive regulation of transmembrane         |        | 115 | 1.90 | 5.04 | 1 |
| BP | 0090 receptor protein serine/threonine kinase    | 10/292 | /23 | E-   | E-   | 0 |
|    | 100 signaling pathway                            |        | 328 | 06   | 06   |   |
|    | GO: stress-activated protein kinase signaling    |        | 272 | 1.94 | 5.15 | 1 |
| BP | 0031 cascade                                     | 15/292 | /23 | E-   | E-   | 5 |
|    | 098                                              |        | 328 | 06   | 06   |   |
|    | GO:                                              |        | 346 | 1.96 | 5.19 | 1 |
| BP | 0052 regulation of endopeptidase activity        | 17/292 | /23 | E-   | E-   | 7 |
|    | 548                                              |        | 328 | 06   | 06   |   |
|    | GO:                                              |        | 273 | 2.03 | 5.37 | 1 |
| BP | 0071 anatomical structure maturation             | 15/292 | /23 | E-   | E-   | 5 |
|    | 695                                              |        | 328 | 06   | 06   |   |
|    | GO:                                              |        | 205 | 2.05 | 5.40 | 1 |
| BP | 0001 osteoblast differentiation                  | 13/292 | /23 | E-   | E-   | 3 |
|    | 649                                              |        | 328 | 06   | 06   |   |
|    | GO:                                              |        | 116 | 2.05 | 5.40 | 1 |
| BP | 0002 negative regulation of peptide secretion    | 10/292 | /23 | E-   | E-   | 0 |
|    | 792                                              |        | 328 | 06   | 06   |   |
|    | GO:                                              |        | 116 | 2.05 | 5.40 | 1 |
| BP | 0051 regulation of amine transport               | 10/292 | /23 | E-   | E-   | 0 |
|    | 952                                              |        | 328 | 06   | 06   |   |
|    | GO:                                              |        | 31/ | 2.07 | 5.42 |   |
| BP | 0031 lymphocyte costimulation                    | 6/292  | 233 | E-   | E-   | 6 |
|    | 294                                              |        | 28  | 06   | 06   |   |
|    | GO: positive regulation of collagen biosynthetic |        | 31/ | 2.07 | 5.42 |   |
| BP | 0032 process                                     | 6/292  | 233 | E-   | E-   | 6 |
|    | 967                                              |        | 28  | 06   | 06   |   |
|    | GO:                                              |        | 31/ | 2.07 | 5.42 |   |
| BP | 0044 regulation of excretion                     | 6/292  | 233 | E-   | E-   | 6 |
|    | 062                                              |        | 28  | 06   | 06   |   |
|    | GO:                                              |        | 144 | 2.10 | 5.49 | 1 |
| BP | 0072 stem cell proliferation                     | 11/292 | /23 | E-   | E-   | 1 |
|    | 089                                              |        | 328 | 06   | 06   |   |
|    | GO:                                              |        | 68/ | 2.11 | 5.51 |   |
| BP | 0002 regulation of B cell mediated immunity      | 8/292  | 233 | E-   | E-   | 8 |
|    | 712                                              |        | 28  | 06   | 06   |   |
|    | GO: regulation of immunoglobulin mediated        |        | 68/ | 2.11 | 5.51 |   |
| BP | 0002 immune response                             | 8/292  | 233 | E-   | E-   | 8 |
|    | 889                                              |        | 28  | 06   | 06   |   |

|    |                                                                             |        |     |      |      |  |   |
|----|-----------------------------------------------------------------------------|--------|-----|------|------|--|---|
|    | GO:                                                                         |        | 348 | 2.12 | 5.51 |  | 1 |
| BP | 0051 positive regulation of protein transport                               | 17/292 | /23 | E-   | E-   |  | 7 |
|    | 222                                                                         |        | 328 | 06   | 06   |  |   |
|    | GO:                                                                         |        | 174 | 2.13 | 5.51 |  | 1 |
| BP | 0043 negative regulation of ion transport                                   | 12/292 | /23 | E-   | E-   |  | 2 |
|    | 271                                                                         |        | 328 | 06   | 06   |  |   |
|    | GO:                                                                         |        | 48/ | 2.13 | 5.51 |  |   |
| BP | 0010 positive regulation of pathway-restricted SMAD protein phosphorylation | 7/292  | 233 | E-   | E-   |  | 7 |
|    | 862                                                                         |        | 28  | 06   | 06   |  |   |
|    | GO:                                                                         |        | 48/ | 2.13 | 5.51 |  |   |
| BP | 0050 activated T cell proliferation                                         | 7/292  | 233 | E-   | E-   |  | 7 |
|    | 798                                                                         |        | 28  | 06   | 06   |  |   |
|    | GO:                                                                         |        | 48/ | 2.13 | 5.51 |  |   |
| BP | 1902 regulation of neutrophil migration                                     | 7/292  | 233 | E-   | E-   |  | 7 |
|    | 622                                                                         |        | 28  | 06   | 06   |  |   |
|    | GO:                                                                         |        | 91/ | 2.13 | 5.51 |  |   |
| BP | 0044 cellular response to fibroblast growth factor stimulus                 | 9/292  | 233 | E-   | E-   |  | 9 |
|    | 344                                                                         |        | 28  | 06   | 06   |  |   |
|    | GO:                                                                         |        | 117 | 2.22 | 5.74 |  |   |
| BP | 0045 positive regulation of lymphocyte differentiation                      | 10/292 | /23 | E-   | E-   |  | 1 |
|    | 621                                                                         |        | 328 | 06   | 06   |  | 0 |
|    | GO:                                                                         |        | 240 | 2.23 | 5.74 |  |   |
| BP | 0045 development of primary sexual characteristics                          | 14/292 | /23 | E-   | E-   |  | 1 |
|    | 137                                                                         |        | 328 | 06   | 06   |  | 4 |
|    | GO:                                                                         |        | 18/ | 2.23 | 5.74 |  |   |
| BP | 0032 positive regulation of interleukin-17 production                       | 5/292  | 233 | E-   | E-   |  | 5 |
|    | 740                                                                         |        | 28  | 06   | 06   |  |   |
|    | GO:                                                                         |        | 92/ | 2.34 | 6.01 |  |   |
| BP | 0045 regulation of glial cell differentiation                               | 9/292  | 233 | E-   | E-   |  | 9 |
|    | 685                                                                         |        | 28  | 06   | 06   |  |   |
|    | GO:                                                                         |        | 69/ | 2.36 | 6.07 |  |   |
| BP | 0042 regulation of epidermal growth factor receptor signaling pathway       | 8/292  | 233 | E-   | E-   |  | 8 |
|    | 058                                                                         |        | 28  | 06   | 06   |  |   |
|    | GO:                                                                         |        | 313 | 2.37 | 6.08 |  |   |
| BP | 0008 epidermis development                                                  | 16/292 | /23 | E-   | E-   |  | 1 |
|    | 544                                                                         |        | 328 | 06   | 06   |  | 6 |
|    | GO:                                                                         |        | 176 | 2.40 | 6.14 |  |   |
| BP | 0007 gastrulation                                                           | 12/292 | /23 | E-   | E-   |  | 1 |
|    | 369                                                                         |        | 328 | 06   | 06   |  | 2 |
|    | GO:                                                                         |        | 118 | 2.40 | 6.14 |  |   |
| BP | 0046 development of primary female sexual characteristics                   | 10/292 | /23 | E-   | E-   |  | 1 |
|    | 545                                                                         |        | 328 | 06   | 06   |  | 0 |



|    |                                                                                   |        |     |      |      |   |
|----|-----------------------------------------------------------------------------------|--------|-----|------|------|---|
| BP | GO: cellular response to transforming growth factor beta stimulus                 | 13/292 | 208 | 2.41 | 6.15 | 1 |
|    | 560                                                                               |        | /23 | E-   | E-   | 3 |
|    |                                                                                   |        | 328 | 06   | 06   |   |
| BP | GO: acute inflammatory response to antigenic stimulus                             | 6/292  | 32/ | 2.52 | 6.41 |   |
|    | 438                                                                               |        | 233 | E-   | E-   | 6 |
|    |                                                                                   |        | 28  | 06   | 06   |   |
| BP | GO: regulation of vascular endothelial growth factor production                   | 6/292  | 32/ | 2.52 | 6.41 |   |
|    | 574                                                                               |        | 233 | E-   | E-   | 6 |
|    |                                                                                   |        | 28  | 06   | 06   |   |
| BP | GO: regulation of smooth muscle cell differentiation                              | 6/292  | 32/ | 2.52 | 6.41 |   |
|    | 150                                                                               |        | 233 | E-   | E-   | 6 |
|    |                                                                                   |        | 28  | 06   | 06   |   |
| BP | GO: myoblast differentiation                                                      | 9/292  | 93/ | 2.56 | 6.49 |   |
|    | 445                                                                               |        | 233 | E-   | E-   | 9 |
|    |                                                                                   |        | 28  | 06   | 06   |   |
| BP | GO: response to fibroblast growth factor                                          | 9/292  | 93/ | 2.56 | 6.49 |   |
|    | 774                                                                               |        | 233 | E-   | E-   | 9 |
|    |                                                                                   |        | 28  | 06   | 06   |   |
| BP | GO: odontogenesis                                                                 | 10/292 | 119 | 2.59 | 6.56 | 1 |
|    | 476                                                                               |        | /23 | E-   | E-   | 0 |
|    |                                                                                   |        | 328 | 06   | 06   |   |
| BP | GO: blood vessel endothelial cell migration                                       | 10/292 | 119 | 2.59 | 6.56 | 1 |
|    | 534                                                                               |        | /23 | E-   | E-   | 0 |
|    |                                                                                   |        | 328 | 06   | 06   |   |
| BP | GO: immunoglobulin production involved in immunoglobulin mediated immune response | 8/292  | 70/ | 2.64 | 6.67 |   |
|    | 381                                                                               |        | 233 | E-   | E-   | 8 |
|    |                                                                                   |        | 28  | 06   | 06   |   |
| BP | GO: regulation of muscle system process                                           | 14/292 | 244 | 2.70 | 6.82 | 1 |
|    | 257                                                                               |        | /23 | E-   | E-   | 4 |
|    |                                                                                   |        | 328 | 06   | 06   |   |
| BP | GO: negative regulation of epithelial cell proliferation                          | 11/292 | 148 | 2.74 | 6.91 | 1 |
|    | 680                                                                               |        | /23 | E-   | E-   | 1 |
|    |                                                                                   |        | 328 | 06   | 06   |   |
| BP | GO: regulation of blood vessel endothelial cell migration                         | 9/292  | 94/ | 2.80 | 7.04 |   |
|    | 535                                                                               |        | 233 | E-   | E-   | 9 |
|    |                                                                                   |        | 28  | 06   | 06   |   |
| BP | GO: regulation of cellular response to growth factor stimulus                     | 15/292 | 281 | 2.90 | 7.29 | 1 |
|    | 287                                                                               |        | /23 | E-   | E-   | 5 |
|    |                                                                                   |        | 328 | 06   | 06   |   |
| BP | GO: receptor metabolic process                                                    | 13/292 | 212 | 2.97 | 7.45 | 1 |
|    | 112                                                                               |        | /23 | E-   | E-   | 3 |
|    |                                                                                   |        | 328 | 06   | 06   |   |

|    |                                                   |        |     |      |      |   |
|----|---------------------------------------------------|--------|-----|------|------|---|
|    | GO:                                               |        | 212 | 2.97 | 7.45 |   |
| BP | 0071 response to transforming growth factor beta  | 13/292 | /23 | E-   | E-   | 1 |
|    | 559                                               |        | 328 | 06   | 06   | 3 |
|    | GO: positive regulation of myeloid leukocyte      |        | 19/ | 2.99 | 7.49 |   |
| BP | 0061 cytokine production involved in immune       | 5/292  | 233 | E-   | E-   | 5 |
|    | 081 response                                      |        | 28  | 06   | 06   |   |
|    | GO:                                               |        | 121 | 3.01 | 7.54 |   |
| BP | 0015 amine transport                              | 10/292 | /23 | E-   | E-   | 1 |
|    | 837                                               |        | 328 | 06   | 06   | 0 |
|    | GO: positive regulation of osteoclast             |        | 33/ | 3.05 | 7.59 |   |
| BP | 0045 differentiation                              | 6/292  | 233 | E-   | E-   | 6 |
|    | 672                                               |        | 28  | 06   | 06   |   |
|    | GO:                                               |        | 33/ | 3.05 | 7.59 |   |
| BP | 0050 regulation of nitric-oxide synthase activity | 6/292  | 233 | E-   | E-   | 6 |
|    | 999                                               |        | 28  | 06   | 06   |   |
|    | GO: negative regulation of epithelial cell        |        | 72/ | 3.27 | 8.15 |   |
| BP | 0010 migration                                    | 8/292  | 233 | E-   | E-   | 8 |
|    | 633                                               |        | 28  | 06   | 06   |   |
|    | GO:                                               |        | 97/ | 3.64 | 9.03 |   |
| BP | 0002 regulation of T cell mediated immunity       | 9/292  | 233 | E-   | E-   | 9 |
|    | 709                                               |        | 28  | 06   | 06   |   |
|    | GO:                                               |        | 34/ | 3.66 | 9.03 |   |
| BP | 0002 response to dietary excess                   | 6/292  | 233 | E-   | E-   | 6 |
|    | 021                                               |        | 28  | 06   | 06   |   |
|    | GO:                                               |        | 34/ | 3.66 | 9.03 |   |
| BP | 0033 regulation of myeloid cell apoptotic process | 6/292  | 233 | E-   | E-   | 6 |
|    | 032                                               |        | 28  | 06   | 06   |   |
|    | GO:                                               |        | 34/ | 3.66 | 9.03 |   |
| BP | 0090 regulation of neutrophil chemotaxis          | 6/292  | 233 | E-   | E-   | 6 |
|    | 022                                               |        | 28  | 06   | 06   |   |
|    | GO:                                               |        | 34/ | 3.66 | 9.03 |   |
| BP | 1904 cellular response to amyloid-beta            | 6/292  | 233 | E-   | E-   | 6 |
|    | 646                                               |        | 28  | 06   | 06   |   |
|    | GO: positive regulation of leukocyte apoptotic    |        | 34/ | 3.66 | 9.03 |   |
| BP | 2000 process                                      | 6/292  | 233 | E-   | E-   | 6 |
|    | 108                                               |        | 28  | 06   | 06   |   |
|    | GO:                                               |        | 34/ | 3.66 | 9.03 |   |
| BP | 2000 positive regulation of T cell migration      | 6/292  | 233 | E-   | E-   | 6 |
|    | 406                                               |        | 28  | 06   | 06   |   |
|    | GO:                                               |        | 52/ | 3.70 | 9.10 |   |
| BP | 0048 autonomic nervous system development         | 7/292  | 233 | E-   | E-   | 7 |
|    | 483                                               |        | 28  | 06   | 06   |   |

|    |                                                                   |        |     |      |      |   |
|----|-------------------------------------------------------------------|--------|-----|------|------|---|
|    | GO:                                                               |        | 52/ | 3.70 | 9.10 |   |
| BP | 0051 positive regulation of oxidoreductase activity               | 7/292  | 233 | E-   | E-   | 7 |
|    | 353                                                               |        | 28  | 06   | 06   |   |
|    | GO:                                                               |        | 52/ | 3.70 | 9.10 |   |
| BP | 1904 negative regulation of epithelial cell apoptotic process     | 7/292  | 233 | E-   | E-   | 7 |
|    | 036                                                               |        | 28  | 06   | 06   |   |
|    | GO:                                                               |        | 124 | 3.76 | 9.23 |   |
| BP | 0051 regulation of striated muscle cell differentiation           | 10/292 | /23 | E-   | E-   | 1 |
|    | 153                                                               |        | 328 | 06   | 06   | 0 |
|    | GO:                                                               |        | 364 | 3.88 | 9.50 |   |
| BP | 1904 positive regulation of establishment of protein localization | 17/292 | /23 | E-   | E-   | 1 |
|    | 951                                                               |        | 328 | 06   | 06   | 7 |
|    | GO:                                                               |        | 20/ | 3.95 | 9.61 |   |
| BP | 0032 response to muramyl dipeptide                                | 5/292  | 233 | E-   | E-   | 5 |
|    | 495                                                               |        | 28  | 06   | 06   |   |
|    | GO:                                                               |        | 20/ | 3.95 | 9.61 |   |
| BP | 0033 negative regulation of myeloid cell apoptotic process        | 5/292  | 233 | E-   | E-   | 5 |
|    | 033                                                               |        | 28  | 06   | 06   |   |
|    | GO:                                                               |        | 20/ | 3.95 | 9.61 |   |
| BP | 0045 regulation of macrophage differentiation                     | 5/292  | 233 | E-   | E-   | 5 |
|    | 649                                                               |        | 28  | 06   | 06   |   |
|    | GO:                                                               |        | 20/ | 3.95 | 9.61 |   |
| BP | 0060 positive regulation of glial cell proliferation              | 5/292  | 233 | E-   | E-   | 5 |
|    | 252                                                               |        | 28  | 06   | 06   |   |
|    | GO:                                                               |        | 20/ | 3.95 | 9.61 |   |
| BP | 0070 response to cholesterol                                      | 5/292  | 233 | E-   | E-   | 5 |
|    | 723                                                               |        | 28  | 06   | 06   |   |
|    | GO:                                                               |        | 74/ | 4.03 | 9.80 |   |
| BP | 1901 regulation of ERBB signaling pathway                         | 8/292  | 233 | E-   | E-   | 8 |
|    | 184                                                               |        | 28  | 06   | 06   |   |
|    | GO:                                                               |        | 218 | 4.04 | 9.80 |   |
| BP | 0043 regulation of symbiotic process                              | 13/292 | /23 | E-   | E-   | 1 |
|    | 903                                                               |        | 328 | 06   | 06   | 3 |
|    | GO:                                                               |        | 53/ | 4.22 | 1.02 |   |
| BP | 0044 regulation of digestive system process                       | 7/292  | 233 | E-   | E-   | 7 |
|    | 058                                                               |        | 28  | 06   | 05   |   |
|    | GO:                                                               |        | 53/ | 4.22 | 1.02 |   |
| BP | 0048 negative regulation of smooth muscle cell proliferation      | 7/292  | 233 | E-   | E-   | 7 |
|    | 662                                                               |        | 28  | 06   | 05   |   |
|    | GO:                                                               |        | 126 | 4.35 | 1.05 |   |
| BP | 0001 liver development                                            | 10/292 | /23 | E-   | E-   | 1 |
|    | 889                                                               |        | 328 | 06   | 05   | 0 |

|    |      |                                                                            |        |      |      |      |  |  |   |
|----|------|----------------------------------------------------------------------------|--------|------|------|------|--|--|---|
|    | GO:  |                                                                            | 126    | 4.35 | 1.05 |      |  |  | 1 |
| BP | 0031 | regulation of cell killing                                                 | 10/292 | /23  | E-   | E-   |  |  | 0 |
|    | 341  |                                                                            |        | 328  | 06   | 05   |  |  |   |
|    | GO:  |                                                                            |        | 35/  | 4.37 | 1.05 |  |  |   |
| BP | 0032 | regulation of interleukin-17 production                                    | 6/292  | 233  | E-   | E-   |  |  | 6 |
|    | 660  |                                                                            |        | 28   | 06   | 05   |  |  |   |
|    | GO:  |                                                                            |        | 35/  | 4.37 | 1.05 |  |  |   |
| BP | 0060 | regulation of syncytium formation by plasma membrane fusion                | 6/292  | 233  | E-   | E-   |  |  | 6 |
|    | 142  |                                                                            |        | 28   | 06   | 05   |  |  |   |
|    | GO:  |                                                                            |        | 75/  | 4.47 | 1.07 |  |  |   |
| BP | 0097 | positive regulation of blood vessel diameter                               | 8/292  | 233  | E-   | E-   |  |  | 8 |
|    | 755  |                                                                            |        | 28   | 06   | 05   |  |  |   |
|    | GO:  |                                                                            |        | 330  | 4.66 | 1.12 |  |  | 1 |
| BP | 0002 | immune response-activating cell surface receptor signaling pathway         | 16/292 | /23  | E-   | E-   |  |  | 6 |
|    | 429  |                                                                            |        | 328  | 06   | 05   |  |  |   |
|    | GO:  |                                                                            |        | 54/  | 4.80 | 1.15 |  |  |   |
| BP | 0014 | glial cell proliferation                                                   | 7/292  | 233  | E-   | E-   |  |  | 7 |
|    | 009  |                                                                            |        | 28   | 06   | 05   |  |  |   |
|    | GO:  |                                                                            |        | 54/  | 4.80 | 1.15 |  |  |   |
| BP | 0035 | exocrine system development                                                | 7/292  | 233  | E-   | E-   |  |  | 7 |
|    | 272  |                                                                            |        | 28   | 06   | 05   |  |  |   |
|    | GO:  |                                                                            |        | 331  | 4.85 | 1.16 |  |  | 1 |
| BP | 0002 | immune response-activating signal transduction                             | 16/292 | /23  | E-   | E-   |  |  | 6 |
|    | 757  |                                                                            |        | 328  | 06   | 05   |  |  |   |
|    | GO:  |                                                                            |        | 222  | 4.93 | 1.18 |  |  | 1 |
| BP | 0030 | lung development                                                           | 13/292 | /23  | E-   | E-   |  |  | 3 |
|    | 324  |                                                                            |        | 328  | 06   | 05   |  |  |   |
|    | GO:  |                                                                            |        | 21/  | 5.13 | 1.22 |  |  |   |
| BP | 0043 | positive regulation of vascular permeability                               | 5/292  | 233  | E-   | E-   |  |  | 5 |
|    | 117  |                                                                            |        | 28   | 06   | 05   |  |  |   |
|    | GO:  |                                                                            |        | 21/  | 5.13 | 1.22 |  |  |   |
| BP | 0070 | positive regulation of lymphocyte apoptotic process                        | 5/292  | 233  | E-   | E-   |  |  | 5 |
|    | 230  |                                                                            |        | 28   | 06   | 05   |  |  |   |
|    | GO:  |                                                                            |        | 36/  | 5.19 | 1.23 |  |  |   |
| BP | 0002 | negative regulation of production of molecular mediator of immune response | 6/292  | 233  | E-   | E-   |  |  | 6 |
|    | 701  |                                                                            |        | 28   | 06   | 05   |  |  |   |
|    | GO:  |                                                                            |        | 36/  | 5.19 | 1.23 |  |  |   |
| BP | 0003 | axis elongation                                                            | 6/292  | 233  | E-   | E-   |  |  | 6 |
|    | 401  |                                                                            |        | 28   | 06   | 05   |  |  |   |
|    | GO:  |                                                                            |        | 36/  | 5.19 | 1.23 |  |  |   |
| BP | 0042 | defense response to protozoan                                              | 6/292  | 233  | E-   | E-   |  |  | 6 |
|    | 832  |                                                                            |        | 28   | 06   | 05   |  |  |   |

|    |      |                                                                   |        |      |      |      |
|----|------|-------------------------------------------------------------------|--------|------|------|------|
|    | GO:  |                                                                   | 36/    | 5.19 | 1.23 |      |
| BP | 2000 | positive regulation of CD4-positive, alpha-beta T cell activation | 6/292  | 233  | E-   | E- 6 |
|    | 516  |                                                                   |        | 28   | 06   | 05   |
|    | GO:  |                                                                   |        | 129  | 5.37 | 1.27 |
| BP | 0061 | hepaticobiliary system development                                | 10/292 | /23  | E-   | E- 1 |
|    | 008  |                                                                   |        | 328  | 06   | 05 0 |
|    | GO:  |                                                                   |        | 102  | 5.52 | 1.31 |
| BP | 0045 | positive regulation of T cell differentiation                     | 9/292  | /23  | E-   | E- 9 |
|    | 582  |                                                                   |        | 328  | 06   | 05   |
|    | GO:  |                                                                   |        | 225  | 5.70 | 1.35 |
| BP | 0030 | respiratory tube development                                      | 13/292 | /23  | E-   | E- 1 |
|    | 323  |                                                                   |        | 328  | 06   | 05 3 |
|    | GO:  |                                                                   |        | 416  | 5.81 | 1.37 |
| BP | 0002 | activation of immune response                                     | 18/292 | /23  | E-   | E- 1 |
|    | 253  |                                                                   |        | 328  | 06   | 05 8 |
|    | GO:  |                                                                   |        | 103  | 5.99 | 1.41 |
| BP | 0007 | epidermal growth factor receptor signaling pathway                | 9/292  | /23  | E-   | E- 9 |
|    | 173  |                                                                   |        | 328  | 06   | 05   |
|    | GO:  |                                                                   |        | 103  | 5.99 | 1.41 |
| BP | 0010 | positive regulation of endothelial cell migration                 | 9/292  | /23  | E-   | E- 9 |
|    | 595  |                                                                   |        | 328  | 06   | 05   |
|    | GO:  |                                                                   |        | 37/  | 6.13 | 1.44 |
| BP | 0007 | salivary gland morphogenesis                                      | 6/292  | 233  | E-   | E- 6 |
|    | 435  |                                                                   |        | 28   | 06   | 05   |
|    | GO:  |                                                                   |        | 104  | 6.48 | 1.52 |
| BP | 0001 | ureteric bud development                                          | 9/292  | /23  | E-   | E- 9 |
|    | 657  |                                                                   |        | 328  | 06   | 05   |
|    | GO:  |                                                                   |        | 104  | 6.48 | 1.52 |
| BP | 0072 | mesonephric epithelium development                                | 9/292  | /23  | E-   | E- 9 |
|    | 163  |                                                                   |        | 328  | 06   | 05   |
|    | GO:  |                                                                   |        | 104  | 6.48 | 1.52 |
| BP | 0072 | mesonephric tubule development                                    | 9/292  | /23  | E-   | E- 9 |
|    | 164  |                                                                   |        | 328  | 06   | 05   |
|    | GO:  |                                                                   |        | 22/  | 6.57 | 1.53 |
| BP | 0044 | hair cycle phase                                                  | 5/292  | 233  | E-   | E- 5 |
|    | 851  |                                                                   |        | 28   | 06   | 05   |
|    | GO:  |                                                                   |        | 162  | 6.57 | 1.53 |
| BP | 0006 | amino acid transport                                              | 11/292 | /23  | E-   | E- 1 |
|    | 865  |                                                                   |        | 328  | 06   | 05 1 |
|    | GO:  |                                                                   |        | 79/  | 6.62 | 1.54 |
| BP | 0051 | regulation of release of sequestered calcium ion into cytosol     | 8/292  | 233  | E-   | E- 8 |
|    | 279  |                                                                   |        | 28   | 06   | 05   |

|    |                                                                     |        |     |      |      |   |
|----|---------------------------------------------------------------------|--------|-----|------|------|---|
|    | GO:                                                                 |        | 463 | 6.81 | 1.59 |   |
| BP | 0009 positive regulation of catabolic process                       | 19/292 | /23 | E-   | E-   | 1 |
|    | 896                                                                 |        | 328 | 06   | 05   | 9 |
|    | GO:                                                                 |        | 421 | 6.84 | 1.59 |   |
| BP | 0052 regulation of peptidase activity                               | 18/292 | /23 | E-   | E-   | 1 |
|    | 547                                                                 |        | 328 | 06   | 05   | 8 |
|    | GO:                                                                 |        | 195 | 6.90 | 1.60 |   |
| BP | 0006 regulation of carbohydrate metabolic process                   | 12/292 | /23 | E-   | E-   | 1 |
|    | 109                                                                 |        | 328 | 06   | 05   | 2 |
|    | GO:                                                                 |        | 57/ | 6.94 | 1.61 |   |
| BP | 0033 regulation of mast cell activation                             | 7/292  | 233 | E-   | E-   | 7 |
|    | 003                                                                 |        | 28  | 06   | 05   |   |
|    | GO:                                                                 |        | 57/ | 6.94 | 1.61 |   |
| BP | 0043 positive regulation of blood vessel endothelial cell migration | 7/292  | 233 | E-   | E-   | 7 |
|    | 536                                                                 |        | 28  | 06   | 05   |   |
|    | GO:                                                                 |        | 57/ | 6.94 | 1.61 |   |
| BP | 0045 T cell selection                                               | 7/292  | 233 | E-   | E-   | 7 |
|    | 058                                                                 |        | 28  | 06   | 05   |   |
|    | GO:                                                                 |        | 302 | 6.95 | 1.61 |   |
| BP | 0030 extracellular matrix organization                              | 15/292 | /23 | E-   | E-   | 1 |
|    | 198                                                                 |        | 328 | 06   | 05   | 5 |
|    | GO:                                                                 |        | 163 | 6.97 | 1.61 |   |
| BP | 1903 regulation of calcium ion transmembrane transport              | 11/292 | /23 | E-   | E-   | 1 |
|    | 169                                                                 |        | 328 | 06   | 05   | 1 |
|    | GO:                                                                 |        | 38/ | 7.20 | 1.66 |   |
| BP | 0002 regulation of inflammatory response to antigenic stimulus      | 6/292  | 233 | E-   | E-   | 6 |
|    | 861                                                                 |        | 28  | 06   | 05   |   |
|    | GO:                                                                 |        | 38/ | 7.20 | 1.66 |   |
| BP | 0090 regulation of superoxide metabolic process                     | 6/292  | 233 | E-   | E-   | 6 |
|    | 322                                                                 |        | 28  | 06   | 05   |   |
|    | GO:                                                                 |        | 303 | 7.23 | 1.66 |   |
| BP | 0043 extracellular structure organization                           | 15/292 | /23 | E-   | E-   | 1 |
|    | 062                                                                 |        | 328 | 06   | 05   | 5 |
|    | GO:                                                                 |        | 164 | 7.39 | 1.69 |   |
| BP | 0051 negative regulation of protein transport                       | 11/292 | /23 | E-   | E-   | 1 |
|    | 224                                                                 |        | 328 | 06   | 05   | 1 |
|    | GO:                                                                 |        | 11/ | 7.41 | 1.69 |   |
| BP | 0002 regulation of T cell tolerance induction                       | 4/292  | 233 | E-   | E-   | 4 |
|    | 664                                                                 |        | 28  | 06   | 05   |   |
|    | GO:                                                                 |        | 11/ | 7.41 | 1.69 |   |
| BP | 0002 regulation of chronic inflammatory response                    | 4/292  | 233 | E-   | E-   | 4 |
|    | 676                                                                 |        | 28  | 06   | 05   |   |

|    |      |                                                                  |        |     |      |      |   |
|----|------|------------------------------------------------------------------|--------|-----|------|------|---|
|    | GO:  |                                                                  |        | 11/ | 7.41 | 1.69 |   |
| BP | 0034 | negative regulation of heterotypic cell-cell adhesion            | 4/292  | 233 | E-   | E-   | 4 |
|    | 115  |                                                                  |        | 28  | 06   | 05   |   |
|    | GO:  |                                                                  |        | 11/ | 7.41 | 1.69 |   |
| BP | 0060 | regulation of branching involved in salivary gland morphogenesis | 4/292  | 233 | E-   | E-   | 4 |
|    | 693  |                                                                  |        | 28  | 06   | 05   |   |
|    | GO:  |                                                                  |        | 11/ | 7.41 | 1.69 |   |
| BP | 0070 | regulation of cell-cell adhesion involved in gastrulation        | 4/292  | 233 | E-   | E-   | 4 |
|    | 587  |                                                                  |        | 28  | 06   | 05   |   |
|    | GO:  |                                                                  |        | 134 | 7.53 | 1.72 | 1 |
| BP | 0045 | regulation of embryonic development                              | 10/292 | /23 | E-   | E-   | 0 |
|    | 995  |                                                                  |        | 328 | 06   | 05   |   |
|    | GO:  |                                                                  |        | 58/ | 7.80 | 1.78 |   |
| BP | 0010 | fibroblast migration                                             | 7/292  | 233 | E-   | E-   | 7 |
|    | 761  |                                                                  |        | 28  | 06   | 05   |   |
|    | GO:  |                                                                  |        | 58/ | 7.80 | 1.78 |   |
| BP | 0048 | inositol phosphate-mediated signaling                            | 7/292  | 233 | E-   | E-   | 7 |
|    | 016  |                                                                  |        | 28  | 06   | 05   |   |
|    | GO:  |                                                                  |        | 232 | 7.94 | 1.80 | 1 |
| BP | 0032 | regulation of stress-activated MAPK cascade                      | 13/292 | /23 | E-   | E-   | 3 |
|    | 872  |                                                                  |        | 328 | 06   | 05   |   |
|    | GO:  |                                                                  |        | 198 | 8.06 | 1.83 | 1 |
| BP | 0030 | positive regulation of cell growth                               | 12/292 | /23 | E-   | E-   | 2 |
|    | 307  |                                                                  |        | 328 | 06   | 05   |   |
|    | GO:  |                                                                  |        | 107 | 8.19 | 1.85 |   |
| BP | 0001 | mesonephros development                                          | 9/292  | /23 | E-   | E-   | 9 |
|    | 823  |                                                                  |        | 328 | 06   | 05   |   |
|    | GO:  |                                                                  |        | 107 | 8.19 | 1.85 |   |
| BP | 0050 | negative regulation of protein secretion                         | 9/292  | /23 | E-   | E-   | 9 |
|    | 709  |                                                                  |        | 328 | 06   | 05   |   |
|    | GO:  |                                                                  |        | 23/ | 8.30 | 1.87 |   |
| BP | 0010 | regulation of macrophage derived foam cell differentiation       | 5/292  | 233 | E-   | E-   | 5 |
|    | 743  |                                                                  |        | 28  | 06   | 05   |   |
|    | GO:  |                                                                  |        | 23/ | 8.30 | 1.87 |   |
| BP | 0032 | positive regulation of interferon-alpha production               | 5/292  | 233 | E-   | E-   | 5 |
|    | 727  |                                                                  |        | 28  | 06   | 05   |   |
|    | GO:  |                                                                  |        | 23/ | 8.30 | 1.87 |   |
| BP | 0032 | positive regulation of superoxide anion generation               | 5/292  | 233 | E-   | E-   | 5 |
|    | 930  |                                                                  |        | 28  | 06   | 05   |   |
|    | GO:  |                                                                  |        | 23/ | 8.30 | 1.87 |   |
| BP | 0051 | regulation of transmission of nerve impulse                      | 5/292  | 233 | E-   | E-   | 5 |
|    | 969  |                                                                  |        | 28  | 06   | 05   |   |

|    |                                                                      |        |     |      |      |   |
|----|----------------------------------------------------------------------|--------|-----|------|------|---|
|    | GO:                                                                  |        | 39/ | 8.42 | 1.89 |   |
| BP | 0042 superoxide anion generation                                     | 6/292  | 233 | E-   | E-   | 6 |
|    | 554                                                                  |        | 28  | 06   | 05   |   |
|    | GO:                                                                  |        | 39/ | 8.42 | 1.89 |   |
| BP | 0050 positive regulation of cytokine secretion                       | 6/292  | 233 | E-   | E-   | 6 |
|    | 715                                                                  |        | 28  | 06   | 05   |   |
|    | GO:                                                                  |        | 470 | 8.42 | 1.89 |   |
| BP | 0060 muscle tissue development                                       | 19/292 | /23 | E-   | E-   | 1 |
|    | 537                                                                  |        | 328 | 06   | 05   | 9 |
|    | GO:                                                                  |        | 199 | 8.48 | 1.90 |   |
| BP | 0050 positive regulation of protein secretion                        | 12/292 | /23 | E-   | E-   | 1 |
|    | 714                                                                  |        | 328 | 06   | 05   | 2 |
|    | GO:                                                                  |        | 270 | 8.66 | 1.94 |   |
| BP | 0050 regulation of B cell activation                                 | 14/292 | /23 | E-   | E-   | 1 |
|    | 864                                                                  |        | 328 | 06   | 05   | 4 |
|    | GO:                                                                  |        | 82/ | 8.75 | 1.96 |   |
| BP | 0032 regulation of type I interferon production                      | 8/292  | 233 | E-   | E-   | 8 |
|    | 479                                                                  |        | 28  | 06   | 05   |   |
|    | GO:                                                                  |        | 108 | 8.83 | 1.97 |   |
| BP | 0043 regulation of carbohydrate biosynthetic process                 | 9/292  | /23 | E-   | E-   | 9 |
|    | 255                                                                  |        | 328 | 06   | 05   |   |
|    | GO:                                                                  |        | 235 | 9.12 | 2.03 |   |
| BP | 0032 response to insulin                                             | 13/292 | /23 | E-   | E-   | 1 |
|    | 868                                                                  |        | 328 | 06   | 05   | 3 |
|    | GO:                                                                  |        | 235 | 9.12 | 2.03 |   |
| BP | 0070 regulation of stress-activated protein kinase signaling cascade | 13/292 | /23 | E-   | E-   | 1 |
|    | 302                                                                  |        | 328 | 06   | 05   | 3 |
|    | GO:                                                                  |        | 309 | 9.13 | 2.03 |   |
| BP | 0008 steroid metabolic process                                       | 15/292 | /23 | E-   | E-   | 1 |
|    | 202                                                                  |        | 328 | 06   | 05   | 5 |
|    | GO:                                                                  |        | 309 | 9.13 | 2.03 |   |
| BP | 0016 viral process                                                   | 15/292 | /23 | E-   | E-   | 1 |
|    | 032                                                                  |        | 328 | 06   | 05   | 5 |
|    | GO:                                                                  |        | 390 | 9.60 | 2.13 |   |
| BP | 0051 regulation of binding                                           | 17/292 | /23 | E-   | E-   | 1 |
|    | 098                                                                  |        | 328 | 06   | 05   | 7 |
|    | GO:                                                                  |        | 40/ | 9.81 | 2.16 |   |
| BP | 0001 response to protozoan                                           | 6/292  | 233 | E-   | E-   | 6 |
|    | 562                                                                  |        | 28  | 06   | 05   |   |
|    | GO:                                                                  |        | 40/ | 9.81 | 2.16 |   |
| BP | 0043 regulation of phosphatidylinositol 3-kinase activity            | 6/292  | 233 | E-   | E-   | 6 |
|    | 551                                                                  |        | 28  | 06   | 05   |   |



|    |                                                    |        |     |      |      |   |
|----|----------------------------------------------------|--------|-----|------|------|---|
|    | GO:                                                |        | 40/ | 9.81 | 2.16 |   |
| BP | 1904 response to amyloid-beta                      | 6/292  | 233 | E-   | E-   | 6 |
|    | 645                                                |        | 28  | 06   | 05   |   |
|    | GO:                                                |        | 60/ | 9.81 | 2.16 |   |
| BP | 0010 positive regulation of calcium ion transport  | 7/292  | 233 | E-   | E-   | 7 |
|    | 524 into cytosol                                   |        | 28  | 06   | 05   |   |
|    | GO:                                                |        | 60/ | 9.81 | 2.16 |   |
| BP | 0090 positive regulation of wound healing          | 7/292  | 233 | E-   | E-   | 7 |
|    | 303                                                |        | 28  | 06   | 05   |   |
|    | GO:                                                |        | 169 | 9.83 | 2.16 | 1 |
| BP | 0007 transforming growth factor beta receptor      | 11/292 | /23 | E-   | E-   | 1 |
|    | 179 signaling pathway                              |        | 328 | 06   | 05   |   |
|    | GO:                                                |        | 169 | 9.83 | 2.16 | 1 |
| BP | 1904 negative regulation of establishment of       | 11/292 | /23 | E-   | E-   | 1 |
|    | 950 protein localization                           |        | 328 | 06   | 05   |   |
|    | GO:                                                |        | 202 | 9.87 | 2.17 | 1 |
| BP | 0000 response to reactive oxygen species           | 12/292 | /23 | E-   | E-   | 2 |
|    | 302                                                |        | 328 | 06   | 05   |   |
|    | GO:                                                |        | 110 | 1.03 | 2.25 |   |
| BP | 0022 digestive system process                      | 9/292  | /23 | E-   | E-   | 9 |
|    | 600                                                |        | 328 | 05   | 05   |   |
|    | GO:                                                |        | 139 | 1.04 | 2.28 | 1 |
| BP | 0010 regulation of cellular ketone metabolic       | 10/292 | /23 | E-   | E-   | 0 |
|    | 565 process                                        |        | 328 | 05   | 05   |   |
|    | GO:                                                |        | 139 | 1.04 | 2.28 | 1 |
| BP | 1900 regulation of protein localization to nucleus | 10/292 | /23 | E-   | E-   | 0 |
|    | 180                                                |        | 328 | 05   | 05   |   |
|    | GO:                                                |        | 12/ | 1.10 | 2.40 |   |
| BP | 0001 response to yeast                             | 4/292  | 233 | E-   | E-   | 4 |
|    | 878                                                |        | 28  | 05   | 05   |   |
|    | GO:                                                |        | 12/ | 1.10 | 2.40 |   |
| BP | 0051 positive regulation of hair follicle          | 4/292  | 233 | E-   | E-   | 4 |
|    | 798 development                                    |        | 28  | 05   | 05   |   |
|    | GO:                                                |        | 12/ | 1.10 | 2.40 |   |
| BP | 0070 cell-cell adhesion involved in gastrulation   | 4/292  | 233 | E-   | E-   | 4 |
|    | 586                                                |        | 28  | 05   | 05   |   |
|    | GO:                                                |        | 111 | 1.10 | 2.41 |   |
| BP | 0008 intrinsic apoptotic signaling pathway in      | 9/292  | /23 | E-   | E-   | 9 |
|    | 630 response to DNA damage                         |        | 328 | 05   | 05   |   |
|    | GO:                                                |        | 41/ | 1.14 | 2.47 |   |
| BP | 0007 salivary gland development                    | 6/292  | 233 | E-   | E-   | 6 |
|    | 431                                                |        | 28  | 05   | 05   |   |

|    |                                                                    |        |     |      |      |   |
|----|--------------------------------------------------------------------|--------|-----|------|------|---|
|    | GO:                                                                |        | 41/ | 1.14 | 2.47 |   |
| BP | 0010 regulation of gastrulation                                    | 6/292  | 233 | E-   | E-   | 6 |
|    | 470                                                                |        | 28  | 05   | 05   |   |
|    | GO:                                                                |        | 41/ | 1.14 | 2.47 |   |
| BP | 0030 macrophage differentiation                                    | 6/292  | 233 | E-   | E-   | 6 |
|    | 225                                                                |        | 28  | 05   | 05   |   |
|    | GO:                                                                |        | 112 | 1.19 | 2.58 |   |
| BP | 0038 ERBB signaling pathway                                        | 9/292  | /23 | E-   | E-   | 9 |
|    | 127                                                                |        | 328 | 05   | 05   |   |
|    | GO:                                                                |        | 62/ | 1.22 | 2.65 |   |
| BP | 0051 negative regulation of muscle cell differentiation            | 7/292  | 233 | E-   | E-   | 7 |
|    | 148                                                                |        | 28  | 05   | 05   |   |
|    | GO:                                                                |        | 62/ | 1.22 | 2.65 |   |
| BP | 0060 regulation of pathway-restricted SMAD protein phosphorylation | 7/292  | 233 | E-   | E-   | 7 |
|    | 393                                                                |        | 28  | 05   | 05   |   |
|    | GO:                                                                |        | 86/ | 1.25 | 2.70 |   |
| BP | 0032 type I interferon production                                  | 8/292  | 233 | E-   | E-   | 8 |
|    | 606                                                                |        | 28  | 05   | 05   |   |
|    | GO:                                                                |        | 207 | 1.26 | 2.73 |   |
| BP | 0030 intracellular receptor signaling pathway                      | 12/292 | /23 | E-   | E-   | 1 |
|    | 522                                                                |        | 328 | 05   | 05   | 2 |
|    | GO:                                                                |        | 25/ | 1.28 | 2.77 |   |
| BP | 0035 regulation of renal sodium excretion                          | 5/292  | 233 | E-   | E-   | 5 |
|    | 813                                                                |        | 28  | 05   | 05   |   |
|    | GO:                                                                |        | 25/ | 1.28 | 2.77 |   |
| BP | 1901 regulation of myoblast fusion                                 | 5/292  | 233 | E-   | E-   | 5 |
|    | 739                                                                |        | 28  | 05   | 05   |   |
|    | GO:                                                                |        | 358 | 1.29 | 2.78 |   |
| BP | 0006 phagocytosis                                                  | 16/292 | /23 | E-   | E-   | 1 |
|    | 909                                                                |        | 328 | 05   | 05   | 6 |
|    | GO:                                                                |        | 42/ | 1.31 | 2.82 |   |
| BP | 0010 specification of animal organ identity                        | 6/292  | 233 | E-   | E-   | 6 |
|    | 092                                                                |        | 28  | 05   | 05   |   |
|    | GO:                                                                |        | 42/ | 1.31 | 2.82 |   |
| BP | 0010 regulation of fibroblast migration                            | 6/292  | 233 | E-   | E-   | 6 |
|    | 762                                                                |        | 28  | 05   | 05   |   |
|    | GO:                                                                |        | 42/ | 1.31 | 2.82 |   |
| BP | 0046 alpha-beta T cell proliferation                               | 6/292  | 233 | E-   | E-   | 6 |
|    | 633                                                                |        | 28  | 05   | 05   |   |
|    | GO:                                                                |        | 63/ | 1.36 | 2.92 |   |
| BP | 0010 regulation of myotube differentiation                         | 7/292  | 233 | E-   | E-   | 7 |
|    | 830                                                                |        | 28  | 05   | 05   |   |

|    |                                                                           |        |     |      |      |   |
|----|---------------------------------------------------------------------------|--------|-----|------|------|---|
|    | GO:                                                                       |        | 114 | 1.37 | 2.94 |   |
| BP | 0042 B cell proliferation                                                 | 9/292  | /23 | E-   | E-   | 9 |
|    | 100                                                                       |        | 328 | 05   | 05   |   |
|    | GO:                                                                       |        | 282 | 1.41 | 3.02 | 1 |
| BP | 0070 calcium ion transmembrane transport                                  | 14/292 | /23 | E-   | E-   | 4 |
|    | 588                                                                       |        | 328 | 05   | 05   |   |
|    | GO:                                                                       |        | 144 | 1.42 | 3.03 | 1 |
| BP | 0001 epithelial to mesenchymal transition                                 | 10/292 | /23 | E-   | E-   | 0 |
|    | 837                                                                       |        | 328 | 05   | 05   |   |
|    | GO:                                                                       |        | 43/ | 1.51 | 3.22 |   |
| BP | 0002 cytoplasmic pattern recognition receptor signaling pathway           | 6/292  | 233 | E-   | E-   | 6 |
|    | 753                                                                       |        | 28  | 05   | 05   |   |
|    | GO:                                                                       |        | 43/ | 1.51 | 3.22 |   |
| BP | 0042 regulation of fatty acid biosynthetic process                        | 6/292  | 233 | E-   | E-   | 6 |
|    | 304                                                                       |        | 28  | 05   | 05   |   |
|    | GO:                                                                       |        | 447 | 1.54 | 3.27 | 1 |
| BP | 0014 striated muscle tissue development                                   | 18/292 | /23 | E-   | E-   | 8 |
|    | 706                                                                       |        | 328 | 05   | 05   |   |
|    | GO:                                                                       |        | 13/ | 1.57 | 3.32 |   |
| BP | 0042 positive regulation of odontogenesis                                 | 4/292  | 233 | E-   | E-   | 4 |
|    | 482                                                                       |        | 28  | 05   | 05   |   |
|    | GO:                                                                       |        | 13/ | 1.57 | 3.32 |   |
| BP | 0042 positive regulation of hair cycle                                    | 4/292  | 233 | E-   | E-   | 4 |
|    | 635                                                                       |        | 28  | 05   | 05   |   |
|    | GO:                                                                       |        | 26/ | 1.57 | 3.32 |   |
| BP | 0010 positive regulation of vascular endothelial growth factor production | 5/292  | 233 | E-   | E-   | 5 |
|    | 575                                                                       |        | 28  | 05   | 05   |   |
|    | GO:                                                                       |        | 26/ | 1.57 | 3.32 |   |
| BP | 0032 receptor biosynthetic process                                        | 5/292  | 233 | E-   | E-   | 5 |
|    | 800                                                                       |        | 28  | 05   | 05   |   |
|    | GO:                                                                       |        | 26/ | 1.57 | 3.32 |   |
| BP | 0032 regulation of superoxide anion generation                            | 5/292  | 233 | E-   | E-   | 5 |
|    | 928                                                                       |        | 28  | 05   | 05   |   |
|    | GO:                                                                       |        | 26/ | 1.57 | 3.32 |   |
| BP | 0034 negative regulation of tissue remodeling                             | 5/292  | 233 | E-   | E-   | 5 |
|    | 104                                                                       |        | 28  | 05   | 05   |   |
|    | GO:                                                                       |        | 26/ | 1.57 | 3.32 |   |
| BP | 0035 steroid hormone secretion                                            | 5/292  | 233 | E-   | E-   | 5 |
|    | 929                                                                       |        | 28  | 05   | 05   |   |
|    | GO:                                                                       |        | 89/ | 1.61 | 3.39 |   |
| BP | 0051 positive regulation of muscle cell differentiation                   | 8/292  | 233 | E-   | E-   | 8 |
|    | 149                                                                       |        | 28  | 05   | 05   |   |

|    |      |                                                    |        |      |      |      |
|----|------|----------------------------------------------------|--------|------|------|------|
|    | GO:  |                                                    | 65/    | 1.68 | 3.53 |      |
| BP | 0034 | regulation of toll-like receptor signaling pathway | 7/292  | 233  | E-   | E- 7 |
|    | 121  |                                                    |        | 28   | 05   | 05   |
|    | GO:  |                                                    |        | 213  | 1.68 | 3.53 |
| BP | 0051 | maintenance of location in cell                    | 12/292 | /23  | E-   | E- 1 |
|    | 651  |                                                    |        | 328  | 05   | 05 2 |
|    | GO:  |                                                    |        | 147  | 1.70 | 3.57 |
| BP | 0003 | cardiac ventricle development                      | 10/292 | /23  | E-   | E- 1 |
|    | 231  |                                                    |        | 328  | 05   | 05 0 |
|    | GO:  |                                                    |        | 147  | 1.70 | 3.57 |
| BP | 0045 | regulation of osteoblast differentiation           | 10/292 | /23  | E-   | E- 1 |
|    | 667  |                                                    |        | 328  | 05   | 05 0 |
|    | GO:  |                                                    |        | 287  | 1.72 | 3.61 |
| BP | 0070 | response to oxygen levels                          | 14/292 | /23  | E-   | E- 1 |
|    | 482  |                                                    |        | 328  | 05   | 05 4 |
|    | GO:  |                                                    |        | 44/  | 1.73 | 3.62 |
| BP | 1903 | negative regulation of blood circulation           | 6/292  | 233  | E-   | E- 6 |
|    | 523  |                                                    |        | 28   | 05   | 05   |
|    | GO:  |                                                    |        | 327  | 1.78 | 3.73 |
| BP | 0021 | developmental maturation                           | 15/292 | /23  | E-   | E- 1 |
|    | 700  |                                                    |        | 328  | 05   | 05 5 |
|    | GO:  |                                                    |        | 118  | 1.81 | 3.78 |
| BP | 2000 | regulation of neural precursor cell proliferation  | 9/292  | /23  | E-   | E- 9 |
|    | 177  |                                                    |        | 328  | 05   | 05   |
|    | GO:  |                                                    |        | 410  | 1.83 | 3.82 |
| BP | 0032 | regulation of actin filament-based process         | 17/292 | /23  | E-   | E- 1 |
|    | 970  |                                                    |        | 328  | 05   | 05 7 |
|    | GO:  |                                                    |        | 215  | 1.84 | 3.84 |
| BP | 0048 | inner ear development                              | 12/292 | /23  | E-   | E- 1 |
|    | 839  |                                                    |        | 328  | 05   | 05 2 |
|    | GO:  |                                                    |        | 91/  | 1.89 | 3.94 |
| BP | 0042 | cholesterol homeostasis                            | 8/292  | 233  | E-   | E- 8 |
|    | 632  |                                                    |        | 28   | 05   | 05   |
|    | GO:  |                                                    |        | 91/  | 1.89 | 3.94 |
| BP | 0072 | regulation of stem cell proliferation              | 8/292  | 233  | E-   | E- 8 |
|    | 091  |                                                    |        | 28   | 05   | 05   |
|    | GO:  |                                                    |        | 27/  | 1.91 | 3.95 |
| BP | 0014 | phasic smooth muscle contraction                   | 5/292  | 233  | E-   | E- 5 |
|    | 821  |                                                    |        | 28   | 05   | 05   |
|    | GO:  |                                                    |        | 27/  | 1.91 | 3.95 |
| BP | 0014 | vascular associated smooth muscle contraction      | 5/292  | 233  | E-   | E- 5 |
|    | 829  |                                                    |        | 28   | 05   | 05   |

|    |      |                                                       |        |      |      |      |
|----|------|-------------------------------------------------------|--------|------|------|------|
|    | GO:  |                                                       | 27/    | 1.91 | 3.95 |      |
| BP | 0032 | positive regulation of monooxygenase activity         | 5/292  | 233  | E-   | E- 5 |
|    | 770  |                                                       |        | 28   | 05   | 05   |
|    | GO:  |                                                       | 27/    | 1.91 | 3.95 |      |
| BP | 0035 | renal sodium excretion                                | 5/292  | 233  | E-   | E- 5 |
|    | 812  |                                                       |        | 28   | 05   | 05   |
|    | GO:  |                                                       | 27/    | 1.91 | 3.95 |      |
| BP | 0060 | labyrinthine layer morphogenesis                      | 5/292  | 233  | E-   | E- 5 |
|    | 713  |                                                       |        | 28   | 05   | 05   |
|    | GO:  |                                                       | 149    | 1.91 | 3.95 | 1    |
| BP | 0007 | memory                                                | 10/292 | /23  | E-   | E- 0 |
|    | 613  |                                                       |        | 328  | 05   | 05   |
|    | GO:  |                                                       | 45/    | 1.97 | 4.06 |      |
| BP | 0001 | negative regulation of endothelial cell proliferation | 6/292  | 233  | E-   | E- 6 |
|    | 937  |                                                       |        | 28   | 05   | 05   |
|    | GO:  |                                                       | 45/    | 1.97 | 4.06 |      |
| BP | 0003 | regulation of animal organ formation                  | 6/292  | 233  | E-   | E- 6 |
|    | 156  |                                                       |        | 28   | 05   | 05   |
|    | GO:  |                                                       | 45/    | 1.97 | 4.06 |      |
| BP | 0031 | developmental induction                               | 6/292  | 233  | E-   | E- 6 |
|    | 128  |                                                       |        | 28   | 05   | 05   |
|    | GO:  |                                                       | 45/    | 1.97 | 4.06 |      |
| BP | 0061 | leukocyte adhesion to vascular endothelial cell       | 6/292  | 233  | E-   | E- 6 |
|    | 756  |                                                       |        | 28   | 05   | 05   |
|    | GO:  |                                                       | 45/    | 1.97 | 4.06 |      |
| BP | 0090 | positive regulation of kidney development             | 6/292  | 233  | E-   | E- 6 |
|    | 184  |                                                       |        | 28   | 05   | 05   |
|    | GO:  |                                                       | 92/    | 2.05 | 4.21 |      |
| BP | 0055 | sterol homeostasis                                    | 8/292  | 233  | E-   | E- 8 |
|    | 092  |                                                       |        | 28   | 05   | 05   |
|    | GO:  |                                                       | 120    | 2.07 | 4.25 |      |
| BP | 0030 | bone mineralization                                   | 9/292  | /23  | E-   | E- 9 |
|    | 282  |                                                       |        | 328  | 05   | 05   |
|    | GO:  |                                                       | 254    | 2.08 | 4.26 | 1    |
| BP | 0060 | respiratory system development                        | 13/292 | /23  | E-   | E- 3 |
|    | 541  |                                                       |        | 328  | 05   | 05   |
|    | GO:  |                                                       | 292    | 2.08 | 4.26 | 1    |
| BP | 0045 | cell fate commitment                                  | 14/292 | /23  | E-   | E- 4 |
|    | 165  |                                                       |        | 328  | 05   | 05   |
|    | GO:  |                                                       | 151    | 2.15 | 4.39 | 1    |
| BP | 0008 | carbohydrate transport                                | 10/292 | /23  | E-   | E- 0 |
|    | 643  |                                                       |        | 328  | 05   | 05   |

|    |      |                                                                      |        |     |      |      |   |
|----|------|----------------------------------------------------------------------|--------|-----|------|------|---|
|    | GO:  |                                                                      |        | 14/ | 2.18 | 4.45 |   |
| BP | 0045 | positive regulation of macrophage differentiation                    | 4/292  | 233 | E-   | E-   | 4 |
|    | 651  |                                                                      |        | 28  | 05   | 05   |   |
|    | GO:  |                                                                      |        | 14/ | 2.18 | 4.45 |   |
| BP | 1905 | regulation of vascular associated smooth muscle cell differentiation | 4/292  | 233 | E-   | E-   | 4 |
|    | 063  |                                                                      |        | 28  | 05   | 05   |   |
|    | GO:  |                                                                      |        | 184 | 2.18 | 4.45 |   |
| BP | 2001 | positive regulation of apoptotic signaling pathway                   | 11/292 | /23 | E-   | E-   | 1 |
|    | 235  |                                                                      |        | 328 | 05   | 05   | 1 |
|    | GO:  |                                                                      |        | 46/ | 2.25 | 4.57 |   |
| BP | 0061 | positive regulation of protein tyrosine kinase activity              | 6/292  | 233 | E-   | E-   | 6 |
|    | 098  |                                                                      |        | 28  | 05   | 05   |   |
|    | GO:  |                                                                      |        | 68/ | 2.26 | 4.59 |   |
| BP | 0046 | regulation of glucose import                                         | 7/292  | 233 | E-   | E-   | 7 |
|    | 324  |                                                                      |        | 28  | 05   | 05   |   |
|    | GO:  |                                                                      |        | 68/ | 2.26 | 4.59 |   |
| BP | 0046 | positive regulation of alpha-beta T cell activation                  | 7/292  | 233 | E-   | E-   | 7 |
|    | 635  |                                                                      |        | 28  | 05   | 05   |   |
|    | GO:  |                                                                      |        | 68/ | 2.26 | 4.59 |   |
| BP | 0046 | regulation of alpha-beta T cell differentiation                      | 7/292  | 233 | E-   | E-   | 7 |
|    | 637  |                                                                      |        | 28  | 05   | 05   |   |
|    | GO:  |                                                                      |        | 28/ | 2.30 | 4.65 |   |
| BP | 0032 | regulation of interferon-alpha production                            | 5/292  | 233 | E-   | E-   | 5 |
|    | 647  |                                                                      |        | 28  | 05   | 05   |   |
|    | GO:  |                                                                      |        | 28/ | 2.30 | 4.65 |   |
| BP | 0048 | hair follicle maturation                                             | 5/292  | 233 | E-   | E-   | 5 |
|    | 820  |                                                                      |        | 28  | 05   | 05   |   |
|    | GO:  |                                                                      |        | 28/ | 2.30 | 4.65 |   |
| BP | 0090 | regulation of monocyte chemotaxis                                    | 5/292  | 233 | E-   | E-   | 5 |
|    | 025  |                                                                      |        | 28  | 05   | 05   |   |
|    | GO:  |                                                                      |        | 28/ | 2.30 | 4.65 |   |
| BP | 2000 | negative regulation of neural precursor cell proliferation           | 5/292  | 233 | E-   | E-   | 5 |
|    | 178  |                                                                      |        | 28  | 05   | 05   |   |
|    | GO:  |                                                                      |        | 257 | 2.35 | 4.75 |   |
| BP | 0002 | epithelial cell development                                          | 13/292 | /23 | E-   | E-   | 1 |
|    | 064  |                                                                      |        | 328 | 05   | 05   | 3 |
|    | GO:  |                                                                      |        | 122 | 2.37 | 4.76 |   |
| BP | 0003 | endothelium development                                              | 9/292  | /23 | E-   | E-   | 9 |
|    | 158  |                                                                      |        | 328 | 05   | 05   |   |
|    | GO:  |                                                                      |        | 122 | 2.37 | 4.76 |   |
| BP | 0050 | negative regulation of T cell activation                             | 9/292  | /23 | E-   | E-   | 9 |
|    | 868  |                                                                      |        | 328 | 05   | 05   |   |

|    |                                                                        |        |     |      |      |   |
|----|------------------------------------------------------------------------|--------|-----|------|------|---|
|    | GO:                                                                    |        | 94/ | 2.40 | 4.83 |   |
| BP | 0009 response to heat                                                  | 8/292  | 233 | E-   | E-   | 8 |
|    | 408                                                                    |        | 28  | 05   | 05   |   |
|    | GO:                                                                    |        | 69/ | 2.49 | 4.99 |   |
| BP | 0006 superoxide metabolic process                                      | 7/292  | 233 | E-   | E-   | 7 |
|    | 801                                                                    |        | 28  | 05   | 05   |   |
|    | GO:                                                                    |        | 69/ | 2.49 | 4.99 |   |
| BP | 0033 cell adhesion mediated by integrin                                | 7/292  | 233 | E-   | E-   | 7 |
|    | 627                                                                    |        | 28  | 05   | 05   |   |
|    | GO:                                                                    |        | 378 | 2.51 | 5.03 | 1 |
| BP | 0009 response to extracellular stimulus                                | 16/292 | /23 | E-   | E-   | 6 |
|    | 991                                                                    |        | 328 | 05   | 05   |   |
|    | GO:                                                                    |        | 47/ | 2.55 | 5.10 |   |
| BP | 0043 positive regulation of multi-organism process                     | 6/292  | 233 | E-   | E-   | 6 |
|    | 902                                                                    |        | 28  | 05   | 05   |   |
|    | GO:                                                                    |        | 70/ | 2.74 | 5.47 |   |
| BP | 0007 neuroblast proliferation                                          | 7/292  | 233 | E-   | E-   | 7 |
|    | 405                                                                    |        | 28  | 05   | 05   |   |
|    | GO:                                                                    |        | 29/ | 2.76 | 5.49 |   |
| BP | 0001 prostaglandin biosynthetic process                                | 5/292  | 233 | E-   | E-   | 5 |
|    | 516                                                                    |        | 28  | 05   | 05   |   |
|    | GO:                                                                    |        | 29/ | 2.76 | 5.49 |   |
| BP | 0007 regulation of epidermal growth factor-activated receptor activity | 5/292  | 233 | E-   | E-   | 5 |
|    | 176                                                                    |        | 28  | 05   | 05   |   |
|    | GO:                                                                    |        | 29/ | 2.76 | 5.49 |   |
| BP | 0035 response to nicotine                                              | 5/292  | 233 | E-   | E-   | 5 |
|    | 094                                                                    |        | 28  | 05   | 05   |   |
|    | GO:                                                                    |        | 29/ | 2.76 | 5.49 |   |
| BP | 0046 prostanoid biosynthetic process                                   | 5/292  | 233 | E-   | E-   | 5 |
|    | 457                                                                    |        | 28  | 05   | 05   |   |
|    | GO:                                                                    |        | 48/ | 2.88 | 5.73 |   |
| BP | 0044 biological phase                                                  | 6/292  | 233 | E-   | E-   | 6 |
|    | 848                                                                    |        | 28  | 05   | 05   |   |
|    | GO:                                                                    |        | 425 | 2.88 | 5.73 | 1 |
| BP | 0001 negative regulation of protein phosphorylation                    | 17/292 | /23 | E-   | E-   | 7 |
|    | 933                                                                    |        | 328 | 05   | 05   |   |
|    | GO:                                                                    |        | 190 | 2.94 | 5.82 | 1 |
| BP | 0050 regulation of insulin secretion                                   | 11/292 | /23 | E-   | E-   | 1 |
|    | 796                                                                    |        | 328 | 05   | 05   |   |
|    | GO:                                                                    |        | 15/ | 2.94 | 5.82 |   |
| BP | 0010 regulation of macrophage cytokine production                      | 4/292  | 233 | E-   | E-   | 4 |
|    | 935                                                                    |        | 28  | 05   | 05   |   |

|    |      |                                                                                 |        |      |      |      |
|----|------|---------------------------------------------------------------------------------|--------|------|------|------|
|    | GO:  |                                                                                 | 15/    | 2.94 | 5.82 |      |
| BP | 0070 | positive regulation of T cell apoptotic process                                 | 4/292  | 233  | E-   | E- 4 |
|    | 234  |                                                                                 |        | 28   | 05   | 05   |
|    | GO:  |                                                                                 | 15/    | 2.94 | 5.82 |      |
| BP | 1903 | negative regulation of production of miRNAs involved in gene silencing by miRNA | 4/292  | 233  | E-   | E- 4 |
|    | 799  |                                                                                 |        | 28   | 05   | 05   |
|    | GO:  |                                                                                 | 71/    | 3.00 | 5.94 |      |
| BP | 0061 | regulation of cartilage development                                             | 7/292  | 233  | E-   | E- 7 |
|    | 035  |                                                                                 |        | 28   | 05   | 05   |
|    | GO:  |                                                                                 | 97/    | 3.02 | 5.94 |      |
| BP | 0001 | vasculogenesis                                                                  | 8/292  | 233  | E-   | E- 8 |
|    | 570  |                                                                                 |        | 28   | 05   | 05   |
|    | GO:  |                                                                                 | 97/    | 3.02 | 5.94 |      |
| BP | 0002 | regulation of heart rate                                                        | 8/292  | 233  | E-   | E- 8 |
|    | 027  |                                                                                 |        | 28   | 05   | 05   |
|    | GO:  |                                                                                 | 97/    | 3.02 | 5.94 |      |
| BP | 0019 | regulation of fatty acid metabolic process                                      | 8/292  | 233  | E-   | E- 8 |
|    | 217  |                                                                                 |        | 28   | 05   | 05   |
|    | GO:  |                                                                                 | 471    | 3.06 | 6.03 |      |
| BP | 0042 | negative regulation of phosphorylation                                          | 18/292 | /23  | E-   | E- 1 |
|    | 326  |                                                                                 |        | 328  | 05   | 05 8 |
|    | GO:  |                                                                                 | 344    | 3.20 | 6.29 |      |
| BP | 0045 | positive regulation of proteolysis                                              | 15/292 | /23  | E-   | E- 1 |
|    | 862  |                                                                                 |        | 328  | 05   | 05 5 |
|    | GO:  |                                                                                 | 49/    | 3.25 | 6.38 |      |
| BP | 0043 | regulation of lipid kinase activity                                             | 6/292  | 233  | E-   | E- 6 |
|    | 550  |                                                                                 |        | 28   | 05   | 05   |
|    | GO:  |                                                                                 | 98/    | 3.25 | 6.38 |      |
| BP | 0030 | negative regulation of ossification                                             | 8/292  | 233  | E-   | E- 8 |
|    | 279  |                                                                                 |        | 28   | 05   | 05   |
|    | GO:  |                                                                                 | 30/    | 3.27 | 6.39 |      |
| BP | 0032 | interferon-alpha production                                                     | 5/292  | 233  | E-   | E- 5 |
|    | 607  |                                                                                 |        | 28   | 05   | 05   |
|    | GO:  |                                                                                 | 30/    | 3.27 | 6.39 |      |
| BP | 0035 | endothelial cell chemotaxis                                                     | 5/292  | 233  | E-   | E- 5 |
|    | 767  |                                                                                 |        | 28   | 05   | 05   |
|    | GO:  |                                                                                 | 30/    | 3.27 | 6.39 |      |
| BP | 0043 | positive regulation of phosphatidylinositol 3-kinase activity                   | 5/292  | 233  | E-   | E- 5 |
|    | 552  |                                                                                 |        | 28   | 05   | 05   |
|    | GO:  |                                                                                 | 30/    | 3.27 | 6.39 |      |
| BP | 0072 | T-helper 17 cell differentiation                                                | 5/292  | 233  | E-   | E- 5 |
|    | 539  |                                                                                 |        | 28   | 05   | 05   |



|    |                                                                    |        |     |      |      |   |   |
|----|--------------------------------------------------------------------|--------|-----|------|------|---|---|
|    | GO:                                                                |        | 72/ | 3.29 | 6.42 |   |   |
| BP | 0045 cellular extravasation                                        | 7/292  | 233 | E-   | E-   | 7 |   |
|    | 123                                                                |        | 28  | 05   | 05   |   |   |
|    | GO:                                                                |        | 128 | 3.46 | 6.75 |   |   |
| BP | 0010 regulation of glucose metabolic process                       | 9/292  | /23 | E-   | E-   | 9 |   |
|    | 906                                                                |        | 328 | 05   | 05   |   |   |
|    | GO:                                                                |        | 73/ | 3.60 | 7.01 |   |   |
| BP | 0051 positive regulation of striated muscle cell differentiation   | 7/292  | 233 | E-   | E-   | 7 |   |
|    | 155                                                                |        | 28  | 05   | 05   |   |   |
|    | GO:                                                                |        | 50/ | 3.66 | 7.11 |   |   |
| BP | 0043 regulation of CD4-positive, alpha-beta T cell differentiation | 6/292  | 233 | E-   | E-   | 6 |   |
|    | 370                                                                |        | 28  | 05   | 05   |   |   |
|    | GO:                                                                |        | 31/ | 3.86 | 7.48 |   |   |
| BP | 0002 positive regulation of defense response to virus by host      | 5/292  | 233 | E-   | E-   | 5 |   |
|    | 230                                                                |        | 28  | 05   | 05   |   |   |
|    | GO:                                                                |        | 31/ | 3.86 | 7.48 |   |   |
| BP | 0042 regulation of odontogenesis                                   | 5/292  | 233 | E-   | E-   | 5 |   |
|    | 481                                                                |        | 28  | 05   | 05   |   |   |
|    | GO:                                                                |        | 31/ | 3.86 | 7.48 |   |   |
| BP | 0072 hepatocyte proliferation                                      | 5/292  | 233 | E-   | E-   | 5 |   |
|    | 574                                                                |        | 28  | 05   | 05   |   |   |
|    | GO:                                                                |        | 31/ | 3.86 | 7.48 |   |   |
| BP | 0072 epithelial cell proliferation involved in liver morphogenesis | 5/292  | 233 | E-   | E-   | 5 |   |
|    | 575                                                                |        | 28  | 05   | 05   |   |   |
|    | GO:                                                                |        | 16/ | 3.89 | 7.51 |   |   |
| BP | 0002 germinal center formation                                     | 4/292  | 233 | E-   | E-   | 4 |   |
|    | 467                                                                |        | 28  | 05   | 05   |   |   |
|    | GO:                                                                |        | 16/ | 3.89 | 7.51 |   |   |
| BP | 0051 negative regulation of smooth muscle cell differentiation     | 4/292  | 233 | E-   | E-   | 4 |   |
|    | 151                                                                |        | 28  | 05   | 05   |   |   |
|    | GO:                                                                |        | 196 | 3.91 | 7.54 |   | 1 |
| BP | 0072 monocarboxylic acid biosynthetic process                      | 11/292 | /23 | E-   | E-   | 1 |   |
|    | 330                                                                |        | 328 | 05   | 05   |   |   |
|    | GO:                                                                |        | 162 | 3.93 | 7.56 |   | 1 |
| BP | 0010 regulation of cellular carbohydrate metabolic process         | 10/292 | /23 | E-   | E-   | 0 |   |
|    | 675                                                                |        | 328 | 05   | 05   |   |   |
|    | GO:                                                                |        | 162 | 3.93 | 7.56 |   | 1 |
| BP | 0031 biomineral tissue development                                 | 10/292 | /23 | E-   | E-   | 0 |   |
|    | 214                                                                |        | 328 | 05   | 05   |   |   |
|    | GO:                                                                |        | 162 | 3.93 | 7.56 |   | 1 |
| BP | 0110 biomineralization                                             | 10/292 | /23 | E-   | E-   | 0 |   |
|    | 148                                                                |        | 328 | 05   | 05   |   |   |

|    |                                                                       |        |     |      |      |   |
|----|-----------------------------------------------------------------------|--------|-----|------|------|---|
|    | GO:                                                                   |        | 101 | 4.04 | 7.77 |   |
| BP | 0033 multicellular organismal response to stress                      | 8/292  | /23 | E-   | E-   | 8 |
|    | 555                                                                   |        | 328 | 05   | 05   |   |
|    | GO:                                                                   |        | 75/ | 4.30 | 8.23 |   |
| BP | 0042 regulation of protein import into nucleus                        | 7/292  | 233 | E-   | E-   | 7 |
|    | 306                                                                   |        | 28  | 05   | 05   |   |
|    | GO:                                                                   |        | 75/ | 4.30 | 8.23 |   |
| BP | 0048 animal organ formation                                           | 7/292  | 233 | E-   | E-   | 7 |
|    | 645                                                                   |        | 28  | 05   | 05   |   |
|    | GO:                                                                   |        | 75/ | 4.30 | 8.23 |   |
| BP | 0051 positive regulation of small GTPase mediated signal transduction | 7/292  | 233 | E-   | E-   | 7 |
|    | 057                                                                   |        | 28  | 05   | 05   |   |
|    | GO:                                                                   |        | 75/ | 4.30 | 8.23 |   |
| BP | 1903 regulation of sprouting angiogenesis                             | 7/292  | 233 | E-   | E-   | 7 |
|    | 670                                                                   |        | 28  | 05   | 05   |   |
|    | GO:                                                                   |        | 396 | 4.39 | 8.40 |   |
| BP | 0031 positive regulation of cellular catabolic process                | 16/292 | /23 | E-   | E-   | 1 |
|    | 331                                                                   |        | 328 | 05   | 05   | 6 |
|    | GO:                                                                   |        | 32/ | 4.53 | 8.62 |   |
| BP | 0031 negative regulation of nervous system process                    | 5/292  | 233 | E-   | E-   | 5 |
|    | 645                                                                   |        | 28  | 05   | 05   |   |
|    | GO:                                                                   |        | 32/ | 4.53 | 8.62 |   |
| BP | 0045 positive regulation of isotype switching                         | 5/292  | 233 | E-   | E-   | 5 |
|    | 830                                                                   |        | 28  | 05   | 05   |   |
|    | GO:                                                                   |        | 32/ | 4.53 | 8.62 |   |
| BP | 0060 apoptotic process involved in morphogenesis                      | 5/292  | 233 | E-   | E-   | 5 |
|    | 561                                                                   |        | 28  | 05   | 05   |   |
|    | GO:                                                                   |        | 32/ | 4.53 | 8.62 |   |
| BP | 0060 embryonic placenta morphogenesis                                 | 5/292  | 233 | E-   | E-   | 5 |
|    | 669                                                                   |        | 28  | 05   | 05   |   |
|    | GO:                                                                   |        | 32/ | 4.53 | 8.62 |   |
| BP | 2000 negative regulation of endothelial cell apoptotic process        | 5/292  | 233 | E-   | E-   | 5 |
|    | 352                                                                   |        | 28  | 05   | 05   |   |
|    | GO:                                                                   |        | 52/ | 4.59 | 8.70 |   |
| BP | 0001 blood vessel remodeling                                          | 6/292  | 233 | E-   | E-   | 6 |
|    | 974                                                                   |        | 28  | 05   | 05   |   |
|    | GO:                                                                   |        | 52/ | 4.59 | 8.70 |   |
| BP | 0042 positive regulation of protein import into nucleus               | 6/292  | 233 | E-   | E-   | 6 |
|    | 307                                                                   |        | 28  | 05   | 05   |   |
|    | GO:                                                                   |        | 52/ | 4.59 | 8.70 |   |
| BP | 0043 positive regulation of potassium ion transport                   | 6/292  | 233 | E-   | E-   | 6 |
|    | 268                                                                   |        | 28  | 05   | 05   |   |

|    |                                                             |        |     |      |      |   |
|----|-------------------------------------------------------------|--------|-----|------|------|---|
|    | GO:                                                         |        | 165 | 4.59 | 8.70 |   |
| BP | 0006 protein import into nucleus                            | 10/292 | /23 | E-   | E-   | 1 |
|    | 606                                                         |        | 328 | 05   | 05   | 0 |
|    | GO:                                                         |        | 103 | 4.65 | 8.81 |   |
| BP | 0050 positive regulation of axonogenesis                    | 8/292  | /23 | E-   | E-   | 8 |
|    | 772                                                         |        | 328 | 05   | 05   |   |
|    | GO:                                                         |        | 76/ | 4.68 | 8.84 |   |
| BP | 0008 fibroblast growth factor receptor signaling pathway    | 7/292  | 233 | E-   | E-   | 7 |
|    | 543                                                         |        | 28  | 05   | 05   |   |
|    | GO:                                                         |        | 76/ | 4.68 | 8.84 |   |
| BP | 0045 mast cell activation                                   | 7/292  | 233 | E-   | E-   | 7 |
|    | 576                                                         |        | 28  | 05   | 05   |   |
|    | GO:                                                         |        | 76/ | 4.68 | 8.84 |   |
| BP | 0045 regulation of osteoclast differentiation               | 7/292  | 233 | E-   | E-   | 7 |
|    | 670                                                         |        | 28  | 05   | 05   |   |
|    | GO:                                                         |        | 275 | 4.74 | 8.94 |   |
| BP | 0043 skin development                                       | 13/292 | /23 | E-   | E-   | 1 |
|    | 588                                                         |        | 328 | 05   | 05   | 3 |
|    | GO:                                                         |        | 201 | 4.91 | 9.25 |   |
| BP | 0032 cellular response to insulin stimulus                  | 11/292 | /23 | E-   | E-   | 1 |
|    | 869                                                         |        | 328 | 05   | 05   | 1 |
|    | GO:                                                         |        | 134 | 4.97 | 9.34 |   |
| BP | 1903 negative regulation of leukocyte cell-cell adhesion    | 9/292  | /23 | E-   | E-   | 9 |
|    | 038                                                         |        | 328 | 05   | 05   |   |
|    | GO:                                                         |        | 104 | 4.99 | 9.37 |   |
| BP | 0048 negative regulation of viral process                   | 8/292  | /23 | E-   | E-   | 8 |
|    | 525                                                         |        | 328 | 05   | 05   |   |
|    | GO:                                                         |        | 17/ | 5.03 | 9.43 |   |
| BP | 0010 macrophage cytokine production                         | 4/292  | 233 | E-   | E-   | 4 |
|    | 934                                                         |        | 28  | 05   | 05   |   |
|    | GO:                                                         |        | 17/ | 5.03 | 9.43 |   |
| BP | 0032 response to progesterone                               | 4/292  | 233 | E-   | E-   | 4 |
|    | 570                                                         |        | 28  | 05   | 05   |   |
|    | GO:                                                         |        | 17/ | 5.03 | 9.43 |   |
| BP | 0035 cellular response to hepatocyte growth factor stimulus | 4/292  | 233 | E-   | E-   | 4 |
|    | 729                                                         |        | 28  | 05   | 05   |   |
|    | GO:                                                         |        | 77/ | 5.10 | 9.54 |   |
| BP | 0043 positive regulation of JUN kinase activity             | 7/292  | 233 | E-   | E-   | 7 |
|    | 507                                                         |        | 28  | 05   | 05   |   |
|    | GO:                                                         |        | 53/ | 5.12 | 9.56 |   |
| BP | 0006 regulation of gluconeogenesis                          | 6/292  | 233 | E-   | E-   | 6 |
|    | 111                                                         |        | 28  | 05   | 05   |   |

|    |                                                                                        |        |     |      |      |   |
|----|----------------------------------------------------------------------------------------|--------|-----|------|------|---|
|    | GO:                                                                                    |        | 53/ | 5.12 | 9.56 |   |
| BP | 0030 prostate gland development                                                        | 6/292  | 233 | E-   | E-   | 6 |
|    | 850                                                                                    |        | 28  | 05   | 05   |   |
|    | GO:                                                                                    |        | 33/ | 5.29 | 9.85 |   |
| BP | 0072 liver morphogenesis                                                               | 5/292  | 233 | E-   | E-   | 5 |
|    | 576                                                                                    |        | 28  | 05   | 05   |   |
|    | GO:                                                                                    |        | 33/ | 5.29 | 9.85 |   |
| BP | 1901 negative regulation of signal transduction in absence of ligand                   | 5/292  | 233 | E-   | E-   | 5 |
|    | 099                                                                                    |        | 28  | 05   | 05   |   |
|    | GO:                                                                                    |        | 33/ | 5.29 | 9.85 |   |
| BP | 2001 negative regulation of extrinsic apoptotic signaling pathway in absence of ligand | 5/292  | 233 | E-   | E-   | 5 |
|    | 240                                                                                    |        | 28  | 05   | 05   |   |
|    | GO:                                                                                    |        | 105 | 5.34 | 9.94 |   |
| BP | 0001 regulation of leukocyte mediated cytotoxicity                                     | 8/292  | /23 | E-   | E-   | 8 |
|    | 910                                                                                    |        | 328 | 05   | 05   |   |
|    | GO:                                                                                    |        | 240 | 5.41 | 0.00 |   |
| BP | 0006 receptor-mediated endocytosis                                                     | 12/292 | /23 | E-   | 010  | 1 |
|    | 898                                                                                    |        | 328 | 05   | 057  | 2 |
|    | GO:                                                                                    |        | 78/ | 5.54 | 0.00 |   |
| BP | 0008 extrinsic apoptotic signaling pathway via death domain receptors                  | 7/292  | 233 | E-   | 010  | 7 |
|    | 625                                                                                    |        | 28  | 05   | 275  |   |
|    | GO:                                                                                    |        | 78/ | 5.54 | 0.00 |   |
| BP | 0050 regulation of steroid biosynthetic process                                        | 7/292  | 233 | E-   | 010  | 7 |
|    | 810                                                                                    |        | 28  | 05   | 275  |   |
|    | GO:                                                                                    |        | 361 | 5.55 | 0.00 |   |
| BP | 0032 regulation of actin cytoskeleton organization                                     | 15/292 | /23 | E-   | 010  | 1 |
|    | 956                                                                                    |        | 328 | 05   | 275  | 5 |
|    | GO:                                                                                    |        | 169 | 5.62 | 0.00 |   |
| BP | 0051 import into nucleus                                                               | 10/292 | /23 | E-   | 010  | 1 |
|    | 170                                                                                    |        | 328 | 05   | 404  | 0 |
|    | GO:                                                                                    |        | 54/ | 5.70 | 0.00 |   |
| BP | 0055 positive regulation of cardiac muscle tissue development                          | 6/292  | 233 | E-   | 010  | 6 |
|    | 025                                                                                    |        | 28  | 05   | 534  |   |
|    | GO:                                                                                    |        | 79/ | 6.01 | 0.00 |   |
| BP | 0002 lymphocyte homeostasis                                                            | 7/292  | 233 | E-   | 011  | 7 |
|    | 260                                                                                    |        | 28  | 05   | 11   |   |
|    | GO:                                                                                    |        | 364 | 6.09 | 0.00 |   |
| BP | 0006 lipid transport                                                                   | 15/292 | /23 | E-   | 011  | 1 |
|    | 869                                                                                    |        | 328 | 05   | 233  | 5 |
|    | GO:                                                                                    |        | 34/ | 6.14 | 0.00 |   |
| BP | 0032 positive regulation of interferon-beta production                                 | 5/292  | 233 | E-   | 011  | 5 |
|    | 728                                                                                    |        | 28  | 05   | 277  |   |

|    |      |                                               |        |      |      |       |
|----|------|-----------------------------------------------|--------|------|------|-------|
|    | GO:  |                                               | 34/    | 6.14 | 0.00 |       |
| BP | 0043 | negative regulation of blood vessel           | 5/292  | 233  | E-   | 011 5 |
|    | 537  | endothelial cell migration                    |        | 28   | 05   | 277   |
|    | GO:  |                                               | 34/    | 6.14 | 0.00 |       |
| BP | 0062 | detection of stimulus involved in sensory     | 5/292  | 233  | E-   | 011 5 |
|    | 149  | perception of pain                            |        | 28   | 05   | 277   |
|    | GO:  |                                               | 34/    | 6.14 | 0.00 |       |
| BP | 0090 | positive regulation of lipid kinase activity  | 5/292  | 233  | E-   | 011 5 |
|    | 218  |                                               |        | 28   | 05   | 277   |
|    | GO:  |                                               | 171    | 6.21 | 0.00 | 1     |
| BP | 0010 | positive regulation of peptidase activity     | 10/292 | /23  | E-   | 011 0 |
|    | 952  |                                               |        | 328  | 05   | 396   |
|    | GO:  |                                               | 55/    | 6.33 | 0.00 |       |
| BP | 0002 | cytokine production involved in inflammatory  | 6/292  | 233  | E-   | 011 6 |
|    | 534  | response                                      |        | 28   | 05   | 584   |
|    | GO:  |                                               | 55/    | 6.33 | 0.00 |       |
| BP | 0032 | interferon-beta production                    | 6/292  | 233  | E-   | 011 6 |
|    | 608  |                                               |        | 28   | 05   | 584   |
|    | GO:  |                                               | 55/    | 6.33 | 0.00 |       |
| BP | 0032 | positive regulation of organic acid transport | 6/292  | 233  | E-   | 011 6 |
|    | 892  |                                               |        | 28   | 05   | 584   |
|    | GO:  |                                               | 18/    | 6.41 | 0.00 |       |
| BP | 0036 | cellular response to sterol                   | 4/292  | 233  | E-   | 011 4 |
|    | 315  |                                               |        | 28   | 05   | 706   |
|    | GO:  |                                               | 18/    | 6.41 | 0.00 |       |
| BP | 0042 | protein refolding                             | 4/292  | 233  | E-   | 011 4 |
|    | 026  |                                               |        | 28   | 05   | 706   |
|    | GO:  |                                               | 409    | 6.43 | 0.00 | 1     |
| BP | 0006 | response to oxidative stress                  | 16/292 | /23  | E-   | 011 6 |
|    | 979  |                                               |        | 328  | 05   | 739   |
|    | GO:  |                                               | 108    | 6.53 | 0.00 |       |
| BP | 0045 | endothelial cell differentiation              | 8/292  | /23  | E-   | 011 8 |
|    | 446  |                                               |        | 328  | 05   | 896   |
|    | GO:  |                                               | 108    | 6.53 | 0.00 |       |
| BP | 0055 | cardiac muscle tissue growth                  | 8/292  | /23  | E-   | 011 8 |
|    | 017  |                                               |        | 328  | 05   | 896   |
|    | GO:  |                                               | 246    | 6.86 | 0.00 | 1     |
| BP | 0043 | ear development                               | 12/292 | /23  | E-   | 012 2 |
|    | 583  |                                               |        | 328  | 05   | 482   |
|    | GO:  |                                               | 140    | 6.98 | 0.00 |       |
| BP | 0046 | positive regulation of JNK cascade            | 9/292  | /23  | E-   | 012 9 |
|    | 330  |                                               |        | 328  | 05   | 695   |

|    |                                                        |        |     |      |      |   |
|----|--------------------------------------------------------|--------|-----|------|------|---|
|    | GO:                                                    |        | 56/ | 7.01 | 0.00 |   |
| BP | 0007 mating                                            | 6/292  | 233 | E-   | 012  | 6 |
|    | 618                                                    |        | 28  | 05   | 726  |   |
|    | GO:                                                    |        | 56/ | 7.01 | 0.00 |   |
| BP | 0045 positive regulation of blood pressure             | 6/292  | 233 | E-   | 012  | 6 |
|    | 777                                                    |        | 28  | 05   | 726  |   |
|    | GO:                                                    |        | 81/ | 7.06 | 0.00 |   |
| BP | 0021 nerve development                                 | 7/292  | 233 | E-   | 012  | 7 |
|    | 675                                                    |        | 28  | 05   | 731  |   |
|    | GO:                                                    |        | 81/ | 7.06 | 0.00 |   |
| BP | 0043 positive regulation of neuron apoptotic process   | 7/292  | 233 | E-   | 012  | 7 |
|    | 525                                                    |        | 28  | 05   | 731  |   |
|    | GO:                                                    |        | 81/ | 7.06 | 0.00 |   |
| BP | 0045 regulation of epidermis development               | 7/292  | 233 | E-   | 012  | 7 |
|    | 682                                                    |        | 28  | 05   | 731  |   |
|    | GO:                                                    |        | 81/ | 7.06 | 0.00 |   |
| BP | 1904 regulation of protein import                      | 7/292  | 233 | E-   | 012  | 7 |
|    | 589                                                    |        | 28  | 05   | 731  |   |
|    | GO:                                                    |        | 35/ | 7.09 | 0.00 |   |
| BP | 0001 myeloid dendritic cell activation                 | 5/292  | 233 | E-   | 012  | 5 |
|    | 773                                                    |        | 28  | 05   | 731  |   |
|    | GO:                                                    |        | 35/ | 7.09 | 0.00 |   |
| BP | 0010 regulation of macrophage chemotaxis               | 5/292  | 233 | E-   | 012  | 5 |
|    | 758                                                    |        | 28  | 05   | 731  |   |
|    | GO:                                                    |        | 35/ | 7.09 | 0.00 |   |
| BP | 0014 glutamate secretion                               | 5/292  | 233 | E-   | 012  | 5 |
|    | 047                                                    |        | 28  | 05   | 731  |   |
|    | GO:                                                    |        | 35/ | 7.09 | 0.00 |   |
| BP | 0072 T-helper 17 type immune response                  | 5/292  | 233 | E-   | 012  | 5 |
|    | 538                                                    |        | 28  | 05   | 731  |   |
|    | GO:                                                    |        | 35/ | 7.09 | 0.00 |   |
| BP | 1990 response to nerve growth factor                   | 5/292  | 233 | E-   | 012  | 5 |
|    | 089                                                    |        | 28  | 05   | 731  |   |
|    | GO:                                                    |        | 35/ | 7.09 | 0.00 |   |
| BP | 1990 cellular response to nerve growth factor stimulus | 5/292  | 233 | E-   | 012  | 5 |
|    | 090                                                    |        | 28  | 05   | 731  |   |
|    | GO:                                                    |        | 413 | 7.21 | 0.00 |   |
| BP | 0010 lipid localization                                | 16/292 | /23 | E-   | 012  | 1 |
|    | 876                                                    |        | 328 | 05   | 939  | 6 |
|    | GO:                                                    |        | 141 | 7.38 | 0.00 |   |
| BP | 0001 leukocyte mediated cytotoxicity                   | 9/292  | /23 | E-   | 013  | 9 |
|    | 909                                                    |        | 328 | 05   | 232  |   |

|    |                                                                                  |        |     |      |      |  |   |
|----|----------------------------------------------------------------------------------|--------|-----|------|------|--|---|
|    | GO:                                                                              |        | 175 | 7.53 | 0.00 |  | 1 |
| BP | 0007 learning                                                                    | 10/292 | /23 | E-   | 013  |  | 0 |
|    | 612                                                                              |        | 328 | 05   | 496  |  |   |
|    | GO:                                                                              |        | 211 | 7.61 | 0.00 |  | 1 |
| BP | 0042 cellular ketone metabolic process                                           | 11/292 | /23 | E-   | 013  |  | 1 |
|    | 180                                                                              |        | 328 | 05   | 619  |  |   |
|    | GO:                                                                              |        | 57/ | 7.76 | 0.00 |  |   |
| BP | 0003 heart valve development                                                     | 6/292  | 233 | E-   | 013  |  | 6 |
|    | 170                                                                              |        | 28  | 05   | 87   |  |   |
|    | GO:                                                                              |        | 19/ | 8.04 | 0.00 |  |   |
| BP | 0002 chronic inflammatory response                                               | 4/292  | 233 | E-   | 014  |  | 4 |
|    | 544                                                                              |        | 28  | 05   | 273  |  |   |
|    | GO:                                                                              |        | 19/ | 8.04 | 0.00 |  |   |
| BP | 0002 positive regulation of humoral immune response                              | 4/292  | 233 | E-   | 014  |  | 4 |
|    | 922                                                                              |        | 28  | 05   | 273  |  |   |
|    | GO:                                                                              |        | 19/ | 8.04 | 0.00 |  |   |
| BP | 0010 programmed cell death involved in cell development                          | 4/292  | 233 | E-   | 014  |  | 4 |
|    | 623                                                                              |        | 28  | 05   | 273  |  |   |
|    | GO:                                                                              |        | 19/ | 8.04 | 0.00 |  |   |
| BP | 0034 toll-like receptor 3 signaling pathway                                      | 4/292  | 233 | E-   | 014  |  | 4 |
|    | 138                                                                              |        | 28  | 05   | 273  |  |   |
|    | GO:                                                                              |        | 19/ | 8.04 | 0.00 |  |   |
| BP | 0035 response to hepatocyte growth factor                                        | 4/292  | 233 | E-   | 014  |  | 4 |
|    | 728                                                                              |        | 28  | 05   | 273  |  |   |
|    | GO:                                                                              |        | 19/ | 8.04 | 0.00 |  |   |
| BP | 0048 enteric nervous system development                                          | 4/292  | 233 | E-   | 014  |  | 4 |
|    | 484                                                                              |        | 28  | 05   | 273  |  |   |
|    | GO:                                                                              |        | 19/ | 8.04 | 0.00 |  |   |
| BP | 0060 negative regulation of gene silencing by miRNA                              | 4/292  | 233 | E-   | 014  |  | 4 |
|    | 965                                                                              |        | 28  | 05   | 273  |  |   |
|    | GO:                                                                              |        | 36/ | 8.14 | 0.00 |  |   |
| BP | 0006 fat-soluble vitamin metabolic process                                       | 5/292  | 233 | E-   | 014  |  | 5 |
|    | 775                                                                              |        | 28  | 05   | 396  |  |   |
|    | GO:                                                                              |        | 36/ | 8.14 | 0.00 |  |   |
| BP | 0033 positive regulation of mast cell activation                                 | 5/292  | 233 | E-   | 014  |  | 5 |
|    | 005                                                                              |        | 28  | 05   | 396  |  |   |
|    | GO:                                                                              |        | 36/ | 8.14 | 0.00 |  |   |
| BP | 0035 vascular associated smooth muscle cell differentiation                      | 5/292  | 233 | E-   | 014  |  | 5 |
|    | 886                                                                              |        | 28  | 05   | 396  |  |   |
|    | GO:                                                                              |        | 36/ | 8.14 | 0.00 |  |   |
| BP | 1904 positive regulation of vascular associated smooth muscle cell proliferation | 5/292  | 233 | E-   | 014  |  | 5 |
|    | 707                                                                              |        | 28  | 05   | 396  |  |   |

|    |      |                                                                           |        |     |      |      |   |
|----|------|---------------------------------------------------------------------------|--------|-----|------|------|---|
|    | GO:  |                                                                           |        | 36/ | 8.14 | 0.00 |   |
| BP | 1905 | positive regulation of cardiocyte differentiation                         | 5/292  | 233 | E-   | 014  | 5 |
|    | 209  |                                                                           |        | 28  | 05   | 396  |   |
|    | GO:  |                                                                           |        | 83/ | 8.26 | 0.00 |   |
| BP | 0002 | production of molecular mediator involved in inflammatory response        | 7/292  | 233 | E-   | 014  | 7 |
|    | 532  |                                                                           |        | 28  | 05   | 523  |   |
|    | GO:  |                                                                           |        | 83/ | 8.26 | 0.00 |   |
| BP | 0045 | positive regulation of striated muscle tissue development                 | 7/292  | 233 | E-   | 014  | 7 |
|    | 844  |                                                                           |        | 28  | 05   | 523  |   |
|    | GO:  |                                                                           |        | 83/ | 8.26 | 0.00 |   |
| BP | 0046 | glucose import                                                            | 7/292  | 233 | E-   | 014  | 7 |
|    | 323  |                                                                           |        | 28  | 05   | 523  |   |
|    | GO:  |                                                                           |        | 83/ | 8.26 | 0.00 |   |
| BP | 0048 | positive regulation of muscle organ development                           | 7/292  | 233 | E-   | 014  | 7 |
|    | 636  |                                                                           |        | 28  | 05   | 523  |   |
|    | GO:  |                                                                           |        | 83/ | 8.26 | 0.00 |   |
| BP | 1904 | positive regulation of calcium ion transmembrane transport                | 7/292  | 233 | E-   | 014  | 7 |
|    | 427  |                                                                           |        | 28  | 05   | 523  |   |
|    | GO:  |                                                                           |        | 418 | 8.29 | 0.00 |   |
| BP | 0000 | nuclear division                                                          | 16/292 | /23 | E-   | 014  | 1 |
|    | 280  |                                                                           |        | 328 | 05   | 577  | 6 |
|    | GO:  |                                                                           |        | 112 | 8.45 | 0.00 |   |
| BP | 0030 | contractile actin filament bundle assembly                                | 8/292  | /23 | E-   | 014  | 8 |
|    | 038  |                                                                           |        | 328 | 05   | 807  |   |
|    | GO:  |                                                                           |        | 112 | 8.45 | 0.00 |   |
| BP | 0043 | stress fiber assembly                                                     | 8/292  | /23 | E-   | 014  | 8 |
|    | 149  |                                                                           |        | 328 | 05   | 807  |   |
|    | GO:  |                                                                           |        | 112 | 8.45 | 0.00 |   |
| BP | 0060 | tube closure                                                              | 8/292  | /23 | E-   | 014  | 8 |
|    | 606  |                                                                           |        | 328 | 05   | 807  |   |
|    | GO:  |                                                                           |        | 58/ | 8.56 | 0.00 |   |
| BP | 0002 | somatic recombination of immunoglobulin genes involved in immune response | 6/292  | 233 | E-   | 014  | 6 |
|    | 204  |                                                                           |        | 28  | 05   | 934  |   |
|    | GO:  |                                                                           |        | 58/ | 8.56 | 0.00 |   |
| BP | 0002 | somatic diversification of immunoglobulins involved in immune response    | 6/292  | 233 | E-   | 014  | 6 |
|    | 208  |                                                                           |        | 28  | 05   | 934  |   |
|    | GO:  |                                                                           |        | 58/ | 8.56 | 0.00 |   |
| BP | 0032 | regulation of interleukin-2 production                                    | 6/292  | 233 | E-   | 014  | 6 |
|    | 663  |                                                                           |        | 28  | 05   | 934  |   |
|    | GO:  |                                                                           |        | 58/ | 8.56 | 0.00 |   |
| BP | 0045 | isotype switching                                                         | 6/292  | 233 | E-   | 014  | 6 |
|    | 190  |                                                                           |        | 28  | 05   | 934  |   |



|    |                                                   |        |     |      |      |   |
|----|---------------------------------------------------|--------|-----|------|------|---|
|    | GO:                                               |        | 58/ | 8.56 | 0.00 |   |
| BP | 1904 positive regulation of protein import        | 6/292  | 233 | E-   | 014  | 6 |
|    | 591                                               |        | 28  | 05   | 934  |   |
|    | GO:                                               |        | 333 | 8.65 | 0.00 | 1 |
| BP | 0046 carboxylic acid transport                    | 14/292 | /23 | E-   | 015  | 4 |
|    | 942                                               |        | 328 | 05   | 069  |   |
|    | GO: negative regulation of cysteine-type          |        | 84/ | 8.91 | 0.00 |   |
| BP | 0043 endopeptidase activity involved in apoptotic | 7/292  | 233 | E-   | 015  | 7 |
|    | 154 process                                       |        | 28  | 05   | 498  |   |
|    | GO: positive regulation of muscle tissue          |        | 84/ | 8.91 | 0.00 |   |
| BP | 1901 development                                  | 7/292  | 233 | E-   | 015  | 7 |
|    | 863                                               |        | 28  | 05   | 498  |   |
|    | GO:                                               |        | 293 | 9.02 | 0.00 | 1 |
| BP | 0034 protein localization to nucleus              | 13/292 | /23 | E-   | 015  | 3 |
|    | 504                                               |        | 328 | 05   | 676  |   |
|    | GO:                                               |        | 59/ | 9.43 | 0.00 |   |
| BP | 0007 excretion                                    | 6/292  | 233 | E-   | 016  | 6 |
|    | 588                                               |        | 28  | 05   | 374  |   |
|    | GO:                                               |        | 146 | 9.65 | 0.00 |   |
| BP | 0045 regulation of fat cell differentiation       | 9/292  | /23 | E-   | 016  | 9 |
|    | 598                                               |        | 328 | 05   | 738  |   |
|    | GO:                                               |        | 217 | 9.77 | 0.00 | 1 |
| BP | 0051 positive regulation of DNA metabolic process | 11/292 | /23 | E-   | 016  | 1 |
|    | 054                                               |        | 328 | 05   | 928  |   |
|    | GO:                                               |        | 337 | 9.81 | 0.00 | 1 |
| BP | 0015 organic acid transport                       | 14/292 | /23 | E-   | 016  | 4 |
|    | 849                                               |        | 328 | 05   | 981  |   |
|    | GO:                                               |        | 20/ | 9.95 | 0.00 |   |
| BP | 0032 prostaglandin secretion                      | 4/292  | 233 | E-   | 017  | 4 |
|    | 310                                               |        | 28  | 05   | 17   |   |
|    | GO: negative regulation of interleukin-12         |        | 20/ | 9.95 | 0.00 |   |
| BP | 0032 production                                   | 4/292  | 233 | E-   | 017  | 4 |
|    | 695                                               |        | 28  | 05   | 17   |   |
|    | GO:                                               |        | 20/ | 9.95 | 0.00 |   |
| BP | 0044 response to leptin                           | 4/292  | 233 | E-   | 017  | 4 |
|    | 321                                               |        | 28  | 05   | 17   |   |
|    | GO:                                               |        | 181 | 9.97 | 0.00 | 1 |
| BP | 0048 regulation of muscle organ development       | 10/292 | /23 | E-   | 017  | 0 |
|    | 634                                               |        | 328 | 05   | 196  |   |
|    | GO:                                               |        | 147 | 0.00 | 0.00 |   |
| BP | 0003 cardiac chamber morphogenesis                | 9/292  | /23 | 010  | 017  | 9 |
|    | 206                                               |        | 328 | 17   | 505  |   |

|    |                                                    |        |     |      |      |   |
|----|----------------------------------------------------|--------|-----|------|------|---|
|    | GO:                                                |        | 147 | 0.00 | 0.00 |   |
| BP | 0035 endocrine system development                  | 9/292  | 723 | 010  | 017  | 9 |
|    | 270                                                |        | 328 | 17   | 505  |   |
|    | GO:                                                |        | 86/ | 0.00 | 0.00 |   |
| BP | 0031 positive regulation of nervous system         | 7/292  | 233 | 010  | 017  | 7 |
|    | 646 process                                        |        | 28  | 349  | 781  |   |
|    | GO:                                                |        | 86/ | 0.00 | 0.00 |   |
| BP | 0060 cardiac septum morphogenesis                  | 7/292  | 233 | 010  | 017  | 7 |
|    | 411                                                |        | 28  | 349  | 781  |   |
|    | GO:                                                |        | 60/ | 0.00 | 0.00 |   |
| BP | 0090 regulation of kidney development              | 6/292  | 233 | 010  | 017  | 6 |
|    | 183                                                |        | 28  | 371  | 786  |   |
|    | GO:                                                |        | 60/ | 0.00 | 0.00 |   |
| BP | 2001 positive regulation of extrinsic apoptotic    | 6/292  | 233 | 010  | 017  | 6 |
|    | 238 signaling pathway                              |        | 28  | 371  | 786  |   |
|    | GO:                                                |        | 38/ | 0.00 | 0.00 |   |
| BP | 0045 regulation of T-helper cell differentiation   | 5/292  | 233 | 010  | 018  | 5 |
|    | 622                                                |        | 28  | 625  | 12   |   |
|    | GO:                                                |        | 38/ | 0.00 | 0.00 |   |
| BP | 0045 positive regulation of epidermis              | 5/292  | 233 | 010  | 018  | 5 |
|    | 684 development                                    |        | 28  | 625  | 12   |   |
|    | GO:                                                |        | 38/ | 0.00 | 0.00 |   |
| BP | 0046 regulation of alpha-beta T cell proliferation | 5/292  | 233 | 010  | 018  | 5 |
|    | 640                                                |        | 28  | 625  | 12   |   |
|    | GO:                                                |        | 38/ | 0.00 | 0.00 |   |
| BP | 0048 response to pain                              | 5/292  | 233 | 010  | 018  | 5 |
|    | 265                                                |        | 28  | 625  | 12   |   |
|    | GO:                                                |        | 38/ | 0.00 | 0.00 |   |
| BP | 0097 dendritic cell differentiation                | 5/292  | 233 | 010  | 018  | 5 |
|    | 028                                                |        | 28  | 625  | 12   |   |
|    | GO:                                                |        | 38/ | 0.00 | 0.00 |   |
| BP | 2000 regulation of actin cytoskeleton              | 5/292  | 233 | 010  | 018  | 5 |
|    | 249 reorganization                                 |        | 28  | 625  | 12   |   |
|    | GO:                                                |        | 258 | 0.00 | 0.00 |   |
| BP | 0048 cardiac muscle tissue development             | 12/292 | 723 | 010  | 018  | 1 |
|    | 738                                                |        | 328 | 778  | 365  | 2 |
|    | GO:                                                |        | 183 | 0.00 | 0.00 |   |
| BP | 0016 morphogenesis of embryonic epithelium         | 10/292 | 723 | 010  | 018  | 1 |
|    | 331                                                |        | 328 | 92   | 589  | 0 |
|    | GO:                                                |        | 220 | 0.00 | 0.00 |   |
| BP | 0050 positive regulation of B cell activation      | 11/292 | 723 | 011  | 018  | 1 |
|    | 871                                                |        | 328 | 034  | 766  | 1 |

|    |                                                                                        |       |     |      |      |   |
|----|----------------------------------------------------------------------------------------|-------|-----|------|------|---|
|    | GO:                                                                                    |       | 61/ | 0.00 | 0.00 |   |
| BP | 0031 regulation of myelination                                                         | 6/292 | 233 | 011  | 019  | 6 |
|    | 641                                                                                    |       | 28  | 383  | 324  |   |
|    | GO:                                                                                    |       | 61/ | 0.00 | 0.00 |   |
| BP | 0045 negative regulation of blood pressure                                             | 6/292 | 233 | 011  | 019  | 6 |
|    | 776                                                                                    |       | 28  | 383  | 324  |   |
|    | GO:                                                                                    |       | 117 | 0.00 | 0.00 |   |
| BP | 0032 positive regulation of ion transmembrane transporter activity                     | 8/292 | /23 | 011  | 019  | 8 |
|    | 414                                                                                    |       | 328 | 484  | 477  |   |
|    | GO:                                                                                    |       | 39/ | 0.00 | 0.00 |   |
| BP | 0042 vasodilation                                                                      | 5/292 | 233 | 012  | 020  | 5 |
|    | 311                                                                                    |       | 28  | 064  | 422  |   |
|    | GO:                                                                                    |       | 39/ | 0.00 | 0.00 |   |
| BP | 0060 regulation of glial cell proliferation                                            | 5/292 | 233 | 012  | 020  | 5 |
|    | 251                                                                                    |       | 28  | 064  | 422  |   |
|    | GO:                                                                                    |       | 21/ | 0.00 | 0.00 |   |
| BP | 0001 nervous system process involved in regulation of systemic arterial blood pressure | 4/292 | 233 | 012  | 020  | 4 |
|    | 976                                                                                    |       | 28  | 167  | 428  |   |
|    | GO:                                                                                    |       | 21/ | 0.00 | 0.00 |   |
| BP | 0002 positive regulation of inflammatory response to antigenic stimulus                | 4/292 | 233 | 012  | 020  | 4 |
|    | 863                                                                                    |       | 28  | 167  | 428  |   |
|    | GO:                                                                                    |       | 21/ | 0.00 | 0.00 |   |
| BP | 0007 activation of phospholipase C activity                                            | 4/292 | 233 | 012  | 020  | 4 |
|    | 202                                                                                    |       | 28  | 167  | 428  |   |
|    | GO:                                                                                    |       | 21/ | 0.00 | 0.00 |   |
| BP | 0032 negative regulation of interleukin-10 production                                  | 4/292 | 233 | 012  | 020  | 4 |
|    | 693                                                                                    |       | 28  | 167  | 428  |   |
|    | GO:                                                                                    |       | 21/ | 0.00 | 0.00 |   |
| BP | 0051 regulation of immunoglobulin secretion                                            | 4/292 | 233 | 012  | 020  | 4 |
|    | 023                                                                                    |       | 28  | 167  | 428  |   |
|    | GO:                                                                                    |       | 21/ | 0.00 | 0.00 |   |
| BP | 0051 negative regulation of amino acid transport                                       | 4/292 | 233 | 012  | 020  | 4 |
|    | 956                                                                                    |       | 28  | 167  | 428  |   |
|    | GO:                                                                                    |       | 21/ | 0.00 | 0.00 |   |
| BP | 0060 negative regulation of posttranscriptional gene silencing                         | 4/292 | 233 | 012  | 020  | 4 |
|    | 149                                                                                    |       | 28  | 167  | 428  |   |
|    | GO:                                                                                    |       | 21/ | 0.00 | 0.00 |   |
| BP | 0060 negative regulation of gene silencing by RNA                                      | 4/292 | 233 | 012  | 020  | 4 |
|    | 967                                                                                    |       | 28  | 167  | 428  |   |
|    | GO:                                                                                    |       | 21/ | 0.00 | 0.00 |   |
| BP | 0090 positive regulation of monocyte chemotaxis                                        | 4/292 | 233 | 012  | 020  | 4 |
|    | 026                                                                                    |       | 28  | 167  | 428  |   |

|    |                                                            |        |     |      |      |   |
|----|------------------------------------------------------------|--------|-----|------|------|---|
|    | GO:                                                        |        | 118 | 0.00 | 0.00 |   |
| BP | 0060 heart growth                                          | 8/292  | /23 | 012  | 020  | 8 |
|    | 419                                                        |        | 328 | 187  | 444  |   |
|    | GO:                                                        |        | 62/ | 0.00 | 0.00 |   |
| BP | 0031 neuron projection regeneration                        | 6/292  | 233 | 012  | 020  | 6 |
|    | 102                                                        |        | 28  | 472  | 884  |   |
|    | GO:                                                        |        | 62/ | 0.00 | 0.00 |   |
| BP | 0046 regulation of bone remodeling                         | 6/292  | 233 | 012  | 020  | 6 |
|    | 850                                                        |        | 28  | 472  | 884  |   |
|    | GO:                                                        |        | 151 | 0.00 | 0.00 |   |
| BP | 0050 defense response to Gram-positive bacterium           | 9/292  | /23 | 012  | 020  | 9 |
|    | 830                                                        |        | 328 | 483  | 884  |   |
|    | GO:                                                        |        | 187 | 0.00 | 0.00 |   |
| BP | 0002 myeloid cell homeostasis                              | 10/292 | /23 | 013  | 021  | 1 |
|    | 262                                                        |        | 328 | 047  | 808  | 0 |
|    | GO:                                                        |        | 225 | 0.00 | 0.00 |   |
| BP | 1901 organic hydroxy compound biosynthetic process         | 11/292 | /23 | 013  | 022  | 1 |
|    | 617                                                        |        | 328 | 451  | 461  | 1 |
|    | GO:                                                        |        | 63/ | 0.00 | 0.00 |   |
| BP | 0016 somatic recombination of immunoglobulin gene segments | 6/292  | 233 | 013  | 022  | 6 |
|    | 447                                                        |        | 28  | 641  | 76   |   |
|    | GO:                                                        |        | 265 | 0.00 | 0.00 |   |
| BP | 0016 immunoglobulin mediated immune response               | 12/292 | /23 | 013  | 023  | 1 |
|    | 064                                                        |        | 328 | 854  | 093  | 2 |
|    | GO:                                                        |        | 393 | 0.00 | 0.00 |   |
| BP | 0030 forebrain development                                 | 15/292 | /23 | 014  | 023  | 1 |
|    | 900                                                        |        | 328 | 226  | 693  | 5 |
|    | GO:                                                        |        | 154 | 0.00 | 0.00 |   |
| BP | 0008 regulation of cell shape                              | 9/292  | /23 | 014  | 024  | 9 |
|    | 360                                                        |        | 328 | 494  | 107  |   |
|    | GO:                                                        |        | 121 | 0.00 | 0.00 |   |
| BP | 0042 response to hydrogen peroxide                         | 8/292  | /23 | 014  | 024  | 8 |
|    | 542                                                        |        | 328 | 514  | 107  |   |
|    | GO:                                                        |        | 121 | 0.00 | 0.00 |   |
| BP | 0050 defense response to Gram-negative bacterium           | 8/292  | /23 | 014  | 024  | 8 |
|    | 829                                                        |        | 328 | 514  | 107  |   |
|    | GO:                                                        |        | 22/ | 0.00 | 0.00 |   |
| BP | 0032 activation of protein kinase B activity               | 4/292  | 233 | 014  | 024  | 4 |
|    | 148                                                        |        | 28  | 724  | 281  |   |
|    | GO:                                                        |        | 22/ | 0.00 | 0.00 |   |
| BP | 0042 cytokine metabolic process                            | 4/292  | 233 | 014  | 024  | 4 |
|    | 107                                                        |        | 28  | 724  | 281  |   |

|    |      |                                                                        |        |      |      |     |   |  |
|----|------|------------------------------------------------------------------------|--------|------|------|-----|---|--|
|    | GO:  |                                                                        | 22/    | 0.00 | 0.00 |     |   |  |
| BP | 0045 | positive regulation of T-helper cell differentiation                   | 4/292  | 233  | 014  | 024 | 4 |  |
|    | 624  |                                                                        |        | 28   | 724  | 281 |   |  |
|    | GO:  |                                                                        | 22/    | 0.00 | 0.00 |     |   |  |
| BP | 0046 | positive regulation of alpha-beta T cell proliferation                 | 4/292  | 233  | 014  | 024 | 4 |  |
|    | 641  |                                                                        |        | 28   | 724  | 281 |   |  |
|    | GO:  |                                                                        | 22/    | 0.00 | 0.00 |     |   |  |
| BP | 0060 | mammary gland alveolus development                                     | 4/292  | 233  | 014  | 024 | 4 |  |
|    | 749  |                                                                        |        | 28   | 724  | 281 |   |  |
|    | GO:  |                                                                        | 22/    | 0.00 | 0.00 |     |   |  |
| BP | 0061 | mammary gland lobule development                                       | 4/292  | 233  | 014  | 024 | 4 |  |
|    | 377  |                                                                        |        | 28   | 724  | 281 |   |  |
|    | GO:  |                                                                        | 22/    | 0.00 | 0.00 |     |   |  |
| BP | 1901 | positive regulation of myoblast fusion                                 | 4/292  | 233  | 014  | 024 | 4 |  |
|    | 741  |                                                                        |        | 28   | 724  | 281 |   |  |
|    | GO:  |                                                                        | 22/    | 0.00 | 0.00 |     |   |  |
| BP | 1904 | positive regulation of leukocyte adhesion to vascular endothelial cell | 4/292  | 233  | 014  | 024 | 4 |  |
|    | 996  |                                                                        |        | 28   | 724  | 281 |   |  |
|    | GO:  |                                                                        | 91/    | 0.00 | 0.00 |     |   |  |
| BP | 0048 | muscle organ morphogenesis                                             | 7/292  | 233  | 014  | 024 | 7 |  |
|    | 644  |                                                                        |        | 28   | 783  | 335 |   |  |
|    | GO:  |                                                                        | 91/    | 0.00 | 0.00 |     |   |  |
| BP | 2000 | negative regulation of cysteine-type endopeptidase activity            | 7/292  | 233  | 014  | 024 | 7 |  |
|    | 117  |                                                                        |        | 28   | 783  | 335 |   |  |
|    | GO:  |                                                                        | 155    | 0.00 | 0.00 |     |   |  |
| BP | 0007 | female gamete generation                                               | 9/292  | /23  | 015  | 025 | 9 |  |
|    | 292  |                                                                        |        | 328  | 222  | 034 |   |  |
|    | GO:  |                                                                        | 41/    | 0.00 | 0.00 |     |   |  |
| BP | 0051 | positive regulation of release of sequestered calcium ion into cytosol | 5/292  | 233  | 015  | 025 | 5 |  |
|    | 281  |                                                                        |        | 28   | 384  | 258 |   |  |
|    | GO:  |                                                                        | 268    | 0.00 | 0.00 |     |   |  |
| BP | 0140 | mitotic nuclear division                                               | 12/292 | /23  | 015  | 025 | 1 |  |
|    | 014  |                                                                        |        | 328  | 385  | 258 | 2 |  |
|    | GO:  |                                                                        | 269    | 0.00 | 0.00 |     |   |  |
| BP | 0019 | B cell mediated immunity                                               | 12/292 | /23  | 015  | 026 | 1 |  |
|    | 724  |                                                                        |        | 328  | 927  | 124 | 2 |  |
|    | GO:  |                                                                        | 156    | 0.00 | 0.00 |     |   |  |
| BP | 0006 | regulation of muscle contraction                                       | 9/292  | /23  | 015  | 026 | 9 |  |
|    | 937  |                                                                        |        | 328  | 979  | 163 |   |  |
|    | GO:  |                                                                        | 156    | 0.00 | 0.00 |     |   |  |
| BP | 0030 | regulation of epithelial cell differentiation                          | 9/292  | /23  | 015  | 026 | 9 |  |
|    | 856  |                                                                        |        | 328  | 979  | 163 |   |  |

|    |                                                            |        |     |      |      |   |
|----|------------------------------------------------------------|--------|-----|------|------|---|
|    | GO:                                                        |        | 231 | 0.00 | 0.00 | 1 |
| BP | 0019 hexose metabolic process                              | 11/292 | /23 | 016  | 027  | 1 |
|    | 318                                                        |        | 328 | 932  | 662  |   |
|    | GO:                                                        |        | 231 | 0.00 | 0.00 | 1 |
| BP | 0043 regulation of protein binding                         | 11/292 | /23 | 016  | 027  | 1 |
|    | 393                                                        |        | 328 | 932  | 662  |   |
|    | GO:                                                        |        | 93/ | 0.00 | 0.00 |   |
| BP | 0043 regulation of JUN kinase activity                     | 7/292  | 233 | 016  | 027  | 7 |
|    | 506                                                        |        | 28  | 94   | 662  |   |
|    | GO:                                                        |        | 124 | 0.00 | 0.00 |   |
| BP | 0032 positive regulation of transporter activity           | 8/292  | /23 | 017  | 028  | 8 |
|    | 411                                                        |        | 328 | 196  | 056  |   |
|    | GO:                                                        |        | 42/ | 0.00 | 0.00 |   |
| BP | 0045 regulation of isotype switching                       | 5/292  | 233 | 017  | 028  | 5 |
|    | 191                                                        |        | 28  | 286  | 178  |   |
|    | GO:                                                        |        | 194 | 0.00 | 0.00 |   |
| BP | 0003 cardiac chamber development                           | 10/292 | /23 | 017  | 028  | 1 |
|    | 205                                                        |        | 328 | 613  | 669  | 0 |
|    | GO:                                                        |        | 23/ | 0.00 | 0.00 |   |
| BP | 0051 regulation of membrane protein ectodomain proteolysis | 4/292  | 233 | 017  | 028  | 4 |
|    | 043                                                        |        | 28  | 649  | 669  |   |
|    | GO:                                                        |        | 23/ | 0.00 | 0.00 |   |
| BP | 2000 regulation of hepatocyte proliferation                | 4/292  | 233 | 017  | 028  | 4 |
|    | 345                                                        |        | 28  | 649  | 669  |   |
|    | GO:                                                        |        | 23/ | 0.00 | 0.00 |   |
| BP | 2000 regulation of steroid hormone secretion               | 4/292  | 233 | 017  | 028  | 4 |
|    | 831                                                        |        | 28  | 649  | 669  |   |
|    | GO:                                                        |        | 94/ | 0.00 | 0.00 |   |
| BP | 0010 regulation of epithelial to mesenchymal transition    | 7/292  | 233 | 018  | 029  | 7 |
|    | 717                                                        |        | 28  | 11   | 391  |   |
|    | GO: positive regulation of cysteine-type                   |        | 125 | 0.00 | 0.00 |   |
| BP | 0043 endopeptidase activity involved in apoptotic process  | 8/292  | /23 | 018  | 029  | 8 |
|    | 280                                                        |        | 328 | 176  | 472  |   |
|    | GO:                                                        |        | 67/ | 0.00 | 0.00 |   |
| BP | 0000 syncytium formation by plasma membrane fusion         | 6/292  | 233 | 019  | 031  | 6 |
|    | 768                                                        |        | 28  | 216  | 05   |   |
|    | GO:                                                        |        | 67/ | 0.00 | 0.00 |   |
| BP | 0006 regulation of smooth muscle contraction               | 6/292  | 233 | 019  | 031  | 6 |
|    | 940                                                        |        | 28  | 216  | 05   |   |
|    | GO:                                                        |        | 67/ | 0.00 | 0.00 |   |
| BP | 0033 tumor necrosis factor-mediated signaling pathway      | 6/292  | 233 | 019  | 031  | 6 |
|    | 209                                                        |        | 28  | 216  | 05   |   |

|    |                                                             |        |     |      |      |   |
|----|-------------------------------------------------------------|--------|-----|------|------|---|
|    | GO:                                                         |        | 67/ | 0.00 | 0.00 |   |
| BP | 0140 cell-cell fusion                                       | 6/292  | 233 | 019  | 031  | 6 |
|    | 253                                                         |        | 28  | 216  | 05   |   |
|    | GO:                                                         |        | 160 | 0.00 | 0.00 |   |
| BP | 0010 positive regulation of endopeptidase activity          | 9/292  | /23 | 019  | 031  | 9 |
|    | 950                                                         |        | 328 | 333  | 203  |   |
|    | GO:                                                         |        | 43/ | 0.00 | 0.00 |   |
| BP | 1902 apoptotic process involved in development              | 5/292  | 233 | 019  | 031  | 5 |
|    | 742                                                         |        | 28  | 362  | 203  |   |
|    | GO:                                                         |        | 43/ | 0.00 | 0.00 |   |
| BP | 1903 regulation of extracellular matrix organization        | 5/292  | 233 | 019  | 031  | 5 |
|    | 053                                                         |        | 28  | 362  | 203  |   |
|    | GO:                                                         |        | 317 | 0.00 | 0.00 |   |
| BP | 0051 striated muscle cell differentiation                   | 13/292 | /23 | 019  | 031  | 1 |
|    | 146                                                         |        | 328 | 653  | 618  | 3 |
|    | GO:                                                         |        | 317 | 0.00 | 0.00 |   |
| BP | 1903 positive regulation of cellular protein localization   | 13/292 | /23 | 019  | 031  | 1 |
|    | 829                                                         |        | 328 | 653  | 618  | 3 |
|    | GO:                                                         |        | 197 | 0.00 | 0.00 |   |
| BP | 0016 carbohydrate biosynthetic process                      | 10/292 | /23 | 019  | 032  | 1 |
|    | 051                                                         |        | 328 | 946  | 061  | 0 |
|    | GO:                                                         |        | 96/ | 0.00 | 0.00 |   |
| BP | 0031 pancreas development                                   | 7/292  | 233 | 020  | 033  | 7 |
|    | 016                                                         |        | 28  | 645  | 155  |   |
|    | GO:                                                         |        | 68/ | 0.00 | 0.00 |   |
| BP | 0015 acidic amino acid transport                            | 6/292  | 233 | 020  | 033  | 6 |
|    | 800                                                         |        | 28  | 857  | 438  |   |
|    | GO:                                                         |        | 68/ | 0.00 | 0.00 |   |
| BP | 0046 positive regulation of Ras protein signal transduction | 6/292  | 233 | 020  | 033  | 6 |
|    | 579                                                         |        | 28  | 857  | 438  |   |
|    | GO:                                                         |        | 24/ | 0.00 | 0.00 |   |
| BP | 0015 prostaglandin transport                                | 4/292  | 233 | 020  | 033  | 4 |
|    | 732                                                         |        | 28  | 972  | 534  |   |
|    | GO:                                                         |        | 24/ | 0.00 | 0.00 |   |
| BP | 0031 positive regulation of myelination                     | 4/292  | 233 | 020  | 033  | 4 |
|    | 643                                                         |        | 28  | 972  | 534  |   |
|    | GO:                                                         |        | 24/ | 0.00 | 0.00 |   |
| BP | 0062 secondary palate development                           | 4/292  | 233 | 020  | 033  | 4 |
|    | 009                                                         |        | 28  | 972  | 534  |   |
|    | GO:                                                         |        | 162 | 0.00 | 0.00 |   |
| BP | 0072 epithelial tube formation                              | 9/292  | /23 | 021  | 033  | 9 |
|    | 175                                                         |        | 328 | 217  | 897  |   |

|    |                                                                   |        |     |      |      |   |
|----|-------------------------------------------------------------------|--------|-----|------|------|---|
|    | GO:                                                               |        | 128 | 0.00 | 0.00 |   |
| BP | 0003 cardiac septum development                                   | 8/292  | /23 | 021  | 034  | 8 |
|    | 279                                                               |        | 328 | 393  | 149  |   |
|    | GO:                                                               |        | 44/ | 0.00 | 0.00 |   |
| BP | 0032 activin receptor signaling pathway                           | 5/292  | 233 | 021  | 034  | 5 |
|    | 924                                                               |        | 28  | 622  | 485  |   |
|    | GO:                                                               |        | 10/ | 0.00 | 0.00 |   |
| BP | 0002 regulation of germinal center formation                      | 3/292  | 233 | 021  | 034  | 3 |
|    | 634                                                               |        | 28  | 825  | 539  |   |
|    | GO:                                                               |        | 10/ | 0.00 | 0.00 |   |
| BP | 0019 antifungal humoral response                                  | 3/292  | 233 | 021  | 034  | 3 |
|    | 732                                                               |        | 28  | 825  | 539  |   |
|    | GO:                                                               |        | 10/ | 0.00 | 0.00 |   |
| BP | 0032 positive regulation of synaptic transmission,<br>cholinergic | 3/292  | 233 | 021  | 034  | 3 |
|    | 224                                                               |        | 28  | 825  | 539  |   |
|    | GO:                                                               |        | 10/ | 0.00 | 0.00 |   |
| BP | 0046 development of secondary female sexual<br>characteristics    | 3/292  | 233 | 021  | 034  | 3 |
|    | 543                                                               |        | 28  | 825  | 539  |   |
|    | GO:                                                               |        | 10/ | 0.00 | 0.00 |   |
| BP | 0046 follicle-stimulating hormone secretion                       | 3/292  | 233 | 021  | 034  | 3 |
|    | 884                                                               |        | 28  | 825  | 539  |   |
|    | GO:                                                               |        | 10/ | 0.00 | 0.00 |   |
| BP | 0090 fibroblast growth factor production                          | 3/292  | 233 | 021  | 034  | 3 |
|    | 269                                                               |        | 28  | 825  | 539  |   |
|    | GO:                                                               |        | 10/ | 0.00 | 0.00 |   |
| BP | 0090 regulation of fibroblast growth factor<br>production         | 3/292  | 233 | 021  | 034  | 3 |
|    | 270                                                               |        | 28  | 825  | 539  |   |
|    | GO:                                                               |        | 10/ | 0.00 | 0.00 |   |
| BP | 2000 regulation of hepatic stellate cell activation               | 3/292  | 233 | 021  | 034  | 3 |
|    | 489                                                               |        | 28  | 825  | 539  |   |
|    | GO:                                                               |        | 10/ | 0.00 | 0.00 |   |
| BP | 2000 regulation of T-helper 2 cell cytokine<br>production         | 3/292  | 233 | 021  | 034  | 3 |
|    | 551                                                               |        | 28  | 825  | 539  |   |
|    | GO:                                                               |        | 200 | 0.00 | 0.00 |   |
| BP | 0007 JNK cascade                                                  | 10/292 | /23 | 022  | 035  | 1 |
|    | 254                                                               |        | 328 | 533  | 629  | 0 |
|    | GO:                                                               |        | 69/ | 0.00 | 0.00 |   |
| BP | 0006 syncytium formation                                          | 6/292  | 233 | 022  | 035  | 6 |
|    | 949                                                               |        | 28  | 606  | 715  |   |
|    | GO:                                                               |        | 280 | 0.00 | 0.00 |   |
| BP | 0032 regulation of transporter activity                           | 12/292 | /23 | 023  | 036  | 1 |
|    | 409                                                               |        | 328 | 05   | 384  | 2 |



|    |      |                                                                        |        |      |      |     |   |
|----|------|------------------------------------------------------------------------|--------|------|------|-----|---|
|    | GO:  |                                                                        | 164    | 0.00 | 0.00 |     |   |
| BP | 0043 | negative regulation of DNA-binding transcription factor activity       | 9/292  | /23  | 023  | 036 | 9 |
|    | 433  |                                                                        |        | 328  | 252  | 672 |   |
|    | GO:  |                                                                        | 201    | 0.00 | 0.00 |     |   |
| BP | 0050 | regulation of viral process                                            | 10/292 | /23  | 023  | 036 | 1 |
|    | 792  |                                                                        |        | 328  | 455  | 961 | 0 |
|    | GO:  |                                                                        | 45/    | 0.00 | 0.00 |     |   |
| BP | 0001 | branching involved in blood vessel morphogenesis                       | 5/292  | 233  | 024  | 037 | 5 |
|    | 569  |                                                                        |        | 28   | 078  | 846 |   |
|    | GO:  |                                                                        | 45/    | 0.00 | 0.00 |     |   |
| BP | 0034 | response to type I interferon                                          | 5/292  | 233  | 024  | 037 | 5 |
|    | 340  |                                                                        |        | 28   | 078  | 846 |   |
|    | GO:  |                                                                        | 45/    | 0.00 | 0.00 |     |   |
| BP | 2000 | regulation of heart morphogenesis                                      | 5/292  | 233  | 024  | 037 | 5 |
|    | 826  |                                                                        |        | 28   | 078  | 846 |   |
|    | GO:  |                                                                        | 202    | 0.00 | 0.00 |     |   |
| BP | 0006 | glucose metabolic process                                              | 10/292 | /23  | 024  | 038 | 1 |
|    | 006  |                                                                        |        | 328  | 409  | 334 | 0 |
|    | GO:  |                                                                        | 70/    | 0.00 | 0.00 |     |   |
| BP | 0016 | somatic diversification of immunoglobulins                             | 6/292  | 233  | 024  | 038 | 6 |
|    | 445  |                                                                        |        | 28   | 469  | 394 |   |
|    | GO:  |                                                                        | 25/    | 0.00 | 0.00 |     |   |
| BP | 0010 | positive regulation of macrophage chemotaxis                           | 4/292  | 233  | 024  | 038 | 4 |
|    | 759  |                                                                        |        | 28   | 722  | 594 |   |
|    | GO:  |                                                                        | 25/    | 0.00 | 0.00 |     |   |
| BP | 0014 | regulation of glutamate secretion                                      | 4/292  | 233  | 024  | 038 | 4 |
|    | 048  |                                                                        |        | 28   | 722  | 594 |   |
|    | GO:  |                                                                        | 25/    | 0.00 | 0.00 |     |   |
| BP | 0051 | killing of cells in other organism involved in symbiotic interaction   | 4/292  | 233  | 024  | 038 | 4 |
|    | 883  |                                                                        |        | 28   | 722  | 594 |   |
|    | GO:  |                                                                        | 25/    | 0.00 | 0.00 |     |   |
| BP | 1903 | regulation of production of miRNAs involved in gene silencing by miRNA | 4/292  | 233  | 024  | 038 | 4 |
|    | 798  |                                                                        |        | 28   | 722  | 594 |   |
|    | GO:  |                                                                        | 25/    | 0.00 | 0.00 |     |   |
| BP | 1904 | vascular associated smooth muscle cell migration                       | 4/292  | 233  | 024  | 038 | 4 |
|    | 738  |                                                                        |        | 28   | 722  | 594 |   |
|    | GO:  |                                                                        | 25/    | 0.00 | 0.00 |     |   |
| BP | 1904 | regulation of vascular associated smooth muscle cell migration         | 4/292  | 233  | 024  | 038 | 4 |
|    | 752  |                                                                        |        | 28   | 722  | 594 |   |
|    | GO:  |                                                                        | 99/    | 0.00 | 0.00 |     |   |
| BP | 0070 | regulation of biomineral tissue development                            | 7/292  | 233  | 024  | 038 | 7 |
|    | 167  |                                                                        |        | 28   | 978  | 929 |   |

|    |                                                  |       |     |      |      |   |
|----|--------------------------------------------------|-------|-----|------|------|---|
|    | GO:                                              |       | 99/ | 0.00 | 0.00 |   |
| BP | 0110 regulation of biomineralization             | 7/292 | 233 | 024  | 038  | 7 |
|    | 149                                              |       | 28  | 978  | 929  |   |
|    | GO:                                              |       | 132 | 0.00 | 0.00 |   |
| BP | 0034 negative regulation of transmembrane        | 8/292 | /23 | 026  | 041  | 8 |
|    | 763 transport                                    |       | 328 | 396  | 104  |   |
|    | GO:                                              |       | 71/ | 0.00 | 0.00 |   |
| BP | 0001 endothelial cell development                | 6/292 | 233 | 026  | 041  | 6 |
|    | 885                                              |       | 28  | 45   | 153  |   |
|    | GO:                                              |       | 167 | 0.00 | 0.00 |   |
| BP | 0042 myelination                                 | 9/292 | /23 | 026  | 041  | 9 |
|    | 552                                              |       | 328 | 606  | 361  |   |
|    | GO:                                              |       | 46/ | 0.00 | 0.00 |   |
| BP | 0006 unsaturated fatty acid biosynthetic process | 5/292 | 233 | 026  | 041  | 5 |
|    | 636                                              |       | 28  | 741  | 5    |   |
|    | GO:                                              |       | 46/ | 0.00 | 0.00 |   |
| BP | 1905 regulation of macrophage migration          | 5/292 | 233 | 026  | 041  | 5 |
|    | 521                                              |       | 28  | 741  | 5    |   |
|    | GO:                                              |       | 101 | 0.00 | 0.00 |   |
| BP | 0060 kidney morphogenesis                        | 7/292 | /23 | 028  | 043  | 7 |
|    | 993                                              |       | 328 | 253  | 81   |   |
|    | GO: somatic diversification of immune receptors  |       | 72/ | 0.00 | 0.00 |   |
| BP | 0002 via germline recombination within a single  | 6/292 | 233 | 028  | 044  | 6 |
|    | 562 locus                                        |       | 28  | 556  | 168  |   |
|    | GO:                                              |       | 72/ | 0.00 | 0.00 |   |
| BP | 0016 somatic cell DNA recombination              | 6/292 | 233 | 028  | 044  | 6 |
|    | 444                                              |       | 28  | 556  | 168  |   |
|    | GO:                                              |       | 72/ | 0.00 | 0.00 |   |
| BP | 0061 negative regulation of wound healing        | 6/292 | 233 | 028  | 044  | 6 |
|    | 045                                              |       | 28  | 556  | 168  |   |
|    | GO:                                              |       | 26/ | 0.00 | 0.00 |   |
| BP | 0010 negative regulation of glucose              | 4/292 | 233 | 028  | 044  | 4 |
|    | 829 transmembrane transport                      |       | 28  | 93   | 598  |   |
|    | GO:                                              |       | 26/ | 0.00 | 0.00 |   |
| BP | 0044 type B pancreatic cell proliferation        | 4/292 | 233 | 028  | 044  | 4 |
|    | 342                                              |       | 28  | 93   | 598  |   |
|    | GO:                                              |       | 26/ | 0.00 | 0.00 |   |
| BP | 0070 negative regulation of T cell apoptotic     | 4/292 | 233 | 028  | 044  | 4 |
|    | 233 process                                      |       | 28  | 93   | 598  |   |
|    | GO:                                              |       | 26/ | 0.00 | 0.00 |   |
| BP | 0070 regulation of production of small RNA       | 4/292 | 233 | 028  | 044  | 4 |
|    | 920 involved in gene silencing by RNA            |       | 28  | 93   | 598  |   |

|    |                                                                         |       |     |      |      |   |
|----|-------------------------------------------------------------------------|-------|-----|------|------|---|
|    | GO:                                                                     |       | 47/ | 0.00 | 0.00 |   |
| BP | 0003 heart valve morphogenesis                                          | 5/292 | 233 | 029  | 045  | 5 |
|    | 179                                                                     |       | 28  | 621  | 511  |   |
|    | GO:                                                                     |       | 47/ | 0.00 | 0.00 |   |
| BP | 0045 positive regulation of DNA recombination                           | 5/292 | 233 | 029  | 045  | 5 |
|    | 911                                                                     |       | 28  | 621  | 511  |   |
|    | GO:                                                                     |       | 47/ | 0.00 | 0.00 |   |
| BP | 0060 maternal process involved in female pregnancy                      | 5/292 | 233 | 029  | 045  | 5 |
|    | 135                                                                     |       | 28  | 621  | 511  |   |
|    | GO:                                                                     |       | 47/ | 0.00 | 0.00 |   |
| BP | 0120 negative regulation of cold-induced thermogenesis                  | 5/292 | 233 | 029  | 045  | 5 |
|    | 163                                                                     |       | 28  | 621  | 511  |   |
|    | GO:                                                                     |       | 11/ | 0.00 | 0.00 |   |
| BP | 0038 nerve growth factor signaling pathway                              | 3/292 | 233 | 029  | 045  | 3 |
|    | 180                                                                     |       | 28  | 731  | 529  |   |
|    | GO:                                                                     |       | 11/ | 0.00 | 0.00 |   |
| BP | 0042 vitamin D biosynthetic process                                     | 3/292 | 233 | 029  | 045  | 3 |
|    | 368                                                                     |       | 28  | 731  | 529  |   |
|    | GO:                                                                     |       | 11/ | 0.00 | 0.00 |   |
| BP | 1902 L-arginine transport                                               | 3/292 | 233 | 029  | 045  | 3 |
|    | 023                                                                     |       | 28  | 731  | 529  |   |
|    | GO:                                                                     |       | 11/ | 0.00 | 0.00 |   |
| BP | 2001 positive regulation of unsaturated fatty acid biosynthetic process | 3/292 | 233 | 029  | 045  | 3 |
|    | 280                                                                     |       | 28  | 731  | 529  |   |
|    | GO:                                                                     |       | 170 | 0.00 | 0.00 |   |
| BP | 0007 ensheathment of neurons                                            | 9/292 | /23 | 030  | 046  | 9 |
|    | 272                                                                     |       | 328 | 352  | 401  |   |
|    | GO:                                                                     |       | 170 | 0.00 | 0.00 |   |
| BP | 0008 axon ensheathment                                                  | 9/292 | /23 | 030  | 046  | 9 |
|    | 366                                                                     |       | 328 | 352  | 401  |   |
|    | GO:                                                                     |       | 73/ | 0.00 | 0.00 |   |
| BP | 0002 positive regulation of T cell mediated immunity                    | 6/292 | 233 | 030  | 046  | 6 |
|    | 711                                                                     |       | 28  | 79   | 994  |   |
|    | GO:                                                                     |       | 73/ | 0.00 | 0.00 |   |
| BP | 1903 positive regulation of anion transport                             | 6/292 | 233 | 030  | 046  | 6 |
|    | 793                                                                     |       | 28  | 79   | 994  |   |
|    | GO:                                                                     |       | 103 | 0.00 | 0.00 |   |
| BP | 0055 regulation of cardiac muscle tissue development                    | 7/292 | /23 | 031  | 048  | 7 |
|    | 024                                                                     |       | 328 | 864  | 593  |   |
|    | GO:                                                                     |       | 48/ | 0.00 | 0.00 |   |
| BP | 0045 positive regulation of vasoconstriction                            | 5/292 | 233 | 032  | 049  | 5 |
|    | 907                                                                     |       | 28  | 73   | 749  |   |

|    |      |                                                               |        |     |      |      |   |  |
|----|------|---------------------------------------------------------------|--------|-----|------|------|---|--|
|    | GO:  |                                                               |        | 48/ | 0.00 | 0.00 |   |  |
| BP | 0048 | vascular endothelial growth factor receptor signaling pathway | 5/292  | 233 | 032  | 049  | 5 |  |
|    | 010  |                                                               |        | 28  | 73   | 749  |   |  |
|    | GO:  |                                                               |        | 48/ | 0.00 | 0.00 |   |  |
| BP | 0050 | positive regulation of calcium-mediated signaling             | 5/292  | 233 | 032  | 049  | 5 |  |
|    | 850  |                                                               |        | 28  | 73   | 749  |   |  |
|    | GO:  |                                                               |        | 48/ | 0.00 | 0.00 |   |  |
| BP | 1903 | positive regulation of phospholipid metabolic process         | 5/292  | 233 | 032  | 049  | 5 |  |
|    | 727  |                                                               |        | 28  | 73   | 749  |   |  |
|    | GO:  |                                                               |        | 472 | 0.00 | 0.00 |   |  |
| BP | 0048 | organelle fission                                             | 16/292 | /23 | 032  | 049  | 1 |  |
|    | 285  |                                                               |        | 328 | 829  | 859  | 6 |  |
|    | GO:  |                                                               |        | 74/ | 0.00 | 0.00 |   |  |
| BP | 0046 | positive regulation of nucleocytoplasmic transport            | 6/292  | 233 | 033  | 050  | 6 |  |
|    | 824  |                                                               |        | 28  | 159  | 319  |   |  |
|    | GO:  |                                                               |        | 27/ | 0.00 | 0.00 |   |  |
| BP | 0006 | inflammatory cell apoptotic process                           | 4/292  | 233 | 033  | 050  | 4 |  |
|    | 925  |                                                               |        | 28  | 629  | 781  |   |  |
|    | GO:  |                                                               |        | 27/ | 0.00 | 0.00 |   |  |
| BP | 0016 | detection of temperature stimulus                             | 4/292  | 233 | 033  | 050  | 4 |  |
|    | 048  |                                                               |        | 28  | 629  | 781  |   |  |
|    | GO:  |                                                               |        | 27/ | 0.00 | 0.00 |   |  |
| BP | 0030 | hyaluronan metabolic process                                  | 4/292  | 233 | 033  | 050  | 4 |  |
|    | 212  |                                                               |        | 28  | 629  | 781  |   |  |
|    | GO:  |                                                               |        | 27/ | 0.00 | 0.00 |   |  |
| BP | 0035 | regulation of urine volume                                    | 4/292  | 233 | 033  | 050  | 4 |  |
|    | 809  |                                                               |        | 28  | 629  | 781  |   |  |
|    | GO:  |                                                               |        | 27/ | 0.00 | 0.00 |   |  |
| BP | 0150 | regulation of neuroinflammatory response                      | 4/292  | 233 | 033  | 050  | 4 |  |
|    | 077  |                                                               |        | 28  | 629  | 781  |   |  |
|    | GO:  |                                                               |        | 27/ | 0.00 | 0.00 |   |  |
| BP | 1904 | regulation of leukocyte adhesion to vascular endothelial cell | 4/292  | 233 | 033  | 050  | 4 |  |
|    | 994  |                                                               |        | 28  | 629  | 781  |   |  |
|    | GO:  |                                                               |        | 292 | 0.00 | 0.00 |   |  |
| BP | 0044 | cellular carbohydrate metabolic process                       | 12/292 | /23 | 033  | 050  | 1 |  |
|    | 262  |                                                               |        | 328 | 752  | 92   | 2 |  |
|    | GO:  |                                                               |        | 104 | 0.00 | 0.00 |   |  |
| BP | 0046 | bone remodeling                                               | 7/292  | /23 | 033  | 050  | 7 |  |
|    | 849  |                                                               |        | 328 | 804  | 92   |   |  |
|    | GO:  |                                                               |        | 104 | 0.00 | 0.00 |   |  |
| BP | 0061 | renal tubule development                                      | 7/292  | /23 | 033  | 050  | 7 |  |
|    | 326  |                                                               |        | 328 | 804  | 92   |   |  |

|    |                                                                                       |        |     |      |      |   |
|----|---------------------------------------------------------------------------------------|--------|-----|------|------|---|
|    | GO:                                                                                   |        | 75/ | 0.00 | 0.00 |   |
| BP | 1903 regulation of phospholipid metabolic process                                     | 6/292  | 233 | 035  | 053  | 6 |
|    | 725                                                                                   |        | 28  | 669  | 686  |   |
|    | GO:                                                                                   |        | 252 | 0.00 | 0.00 |   |
| BP | 0021 telencephalon development                                                        | 11/292 | /23 | 035  | 053  | 1 |
|    | 537                                                                                   |        | 328 | 748  | 761  | 1 |
|    | GO:                                                                                   |        | 212 | 0.00 | 0.00 |   |
| BP | 0097 response to alcohol                                                              | 10/292 | /23 | 035  | 053  | 1 |
|    | 305                                                                                   |        | 328 | 874  | 906  | 0 |
|    | GO:                                                                                   |        | 174 | 0.00 | 0.00 |   |
| BP | 0001 placenta development                                                             | 9/292  | /23 | 036  | 053  | 9 |
|    | 890                                                                                   |        | 328 | 014  | 909  |   |
|    | GO:                                                                                   |        | 49/ | 0.00 | 0.00 |   |
| BP | 0006 prostanoid metabolic process                                                     | 5/292  | 233 | 036  | 053  | 5 |
|    | 692                                                                                   |        | 28  | 08   | 909  |   |
|    | GO:                                                                                   |        | 49/ | 0.00 | 0.00 |   |
| BP | 0006 prostaglandin metabolic process                                                  | 5/292  | 233 | 036  | 053  | 5 |
|    | 693                                                                                   |        | 28  | 08   | 909  |   |
|    | GO:                                                                                   |        | 49/ | 0.00 | 0.00 |   |
| BP | 0032 secretion by tissue                                                              | 5/292  | 233 | 036  | 053  | 5 |
|    | 941                                                                                   |        | 28  | 08   | 909  |   |
|    | GO:                                                                                   |        | 49/ | 0.00 | 0.00 |   |
| BP | 0033 calcineurin-NFAT signaling cascade                                               | 5/292  | 233 | 036  | 053  | 5 |
|    | 173                                                                                   |        | 28  | 08   | 909  |   |
|    | GO:                                                                                   |        | 49/ | 0.00 | 0.00 |   |
| BP | 0046 positive regulation of alpha-beta T cell differentiation                         | 5/292  | 233 | 036  | 053  | 5 |
|    | 638                                                                                   |        | 28  | 08   | 909  |   |
|    | GO:                                                                                   |        | 49/ | 0.00 | 0.00 |   |
| BP | 1903 regulation of glycoprotein metabolic process                                     | 5/292  | 233 | 036  | 053  | 5 |
|    | 018                                                                                   |        | 28  | 08   | 909  |   |
|    | GO:                                                                                   |        | 106 | 0.00 | 0.00 |   |
| BP | 0031 actin cytoskeleton reorganization                                                | 7/292  | /23 | 037  | 056  | 7 |
|    | 532                                                                                   |        | 328 | 966  | 681  |   |
|    | GO:                                                                                   |        | 76/ | 0.00 | 0.00 |   |
| BP | 0006 gluconeogenesis                                                                  | 6/292  | 233 | 038  | 057  | 6 |
|    | 094                                                                                   |        | 28  | 325  | 124  |   |
|    | GO:                                                                                   |        | 76/ | 0.00 | 0.00 |   |
| BP | 0006 activation of cysteine-type endopeptidase activity involved in apoptotic process | 6/292  | 233 | 038  | 057  | 6 |
|    | 919                                                                                   |        | 28  | 325  | 124  |   |
|    | GO:                                                                                   |        | 28/ | 0.00 | 0.00 |   |
| BP | 0002 positive regulation of cellular extravasation                                    | 4/292  | 233 | 038  | 057  | 4 |
|    | 693                                                                                   |        | 28  | 85   | 747  |   |

|    |                                                                          |       |     |      |      |   |
|----|--------------------------------------------------------------------------|-------|-----|------|------|---|
|    | GO:                                                                      |       | 28/ | 0.00 | 0.00 |   |
| BP | 0010 positive regulation of heart rate                                   | 4/292 | 233 | 038  | 057  | 4 |
|    | 460                                                                      |       | 28  | 85   | 747  |   |
|    | GO:                                                                      |       | 176 | 0.00 | 0.00 |   |
| BP | 0009 response to mechanical stimulus                                     | 9/292 | /23 | 039  | 057  | 9 |
|    | 612                                                                      |       | 328 | 157  | 747  |   |
|    | GO:                                                                      |       | 12/ | 0.00 | 0.00 |   |
| BP | 0001 natural killer cell proliferation                                   | 3/292 | 233 | 039  | 057  | 3 |
|    | 787                                                                      |       | 28  | 275  | 747  |   |
|    | GO:                                                                      |       | 12/ | 0.00 | 0.00 |   |
| BP | 0002 regulation of blood volume by renin-<br>angiotensin                 | 3/292 | 233 | 039  | 057  | 3 |
|    | 016                                                                      |       | 28  | 275  | 747  |   |
|    | GO:                                                                      |       | 12/ | 0.00 | 0.00 |   |
| BP | 0014 artery smooth muscle contraction                                    | 3/292 | 233 | 039  | 057  | 3 |
|    | 824                                                                      |       | 28  | 275  | 747  |   |
|    | GO:                                                                      |       | 12/ | 0.00 | 0.00 |   |
| BP | 0031 regulation of prostaglandin biosynthetic<br>process                 | 3/292 | 233 | 039  | 057  | 3 |
|    | 392                                                                      |       | 28  | 275  | 747  |   |
|    | GO:                                                                      |       | 12/ | 0.00 | 0.00 |   |
| BP | 0032 positive regulation of interleukin-5<br>production                  | 3/292 | 233 | 039  | 057  | 3 |
|    | 754                                                                      |       | 28  | 275  | 747  |   |
|    | GO:                                                                      |       | 12/ | 0.00 | 0.00 |   |
| BP | 0035 hepatic stellate cell activation                                    | 3/292 | 233 | 039  | 057  | 3 |
|    | 733                                                                      |       | 28  | 275  | 747  |   |
|    | GO:                                                                      |       | 12/ | 0.00 | 0.00 |   |
| BP | 0070 extracellular matrix constituent secretion                          | 3/292 | 233 | 039  | 057  | 3 |
|    | 278                                                                      |       | 28  | 275  | 747  |   |
|    | GO:                                                                      |       | 12/ | 0.00 | 0.00 |   |
| BP | 0071 positive regulation of monocyte chemotactic<br>protein-1 production | 3/292 | 233 | 039  | 057  | 3 |
|    | 639                                                                      |       | 28  | 275  | 747  |   |
|    | GO:                                                                      |       | 12/ | 0.00 | 0.00 |   |
| BP | 0097 liver regeneration                                                  | 3/292 | 233 | 039  | 057  | 3 |
|    | 421                                                                      |       | 28  | 275  | 747  |   |
|    | GO:                                                                      |       | 12/ | 0.00 | 0.00 |   |
| BP | 0150 negative regulation of neuroinflammatory<br>response                | 3/292 | 233 | 039  | 057  | 3 |
|    | 079                                                                      |       | 28  | 275  | 747  |   |
|    | GO:                                                                      |       | 12/ | 0.00 | 0.00 |   |
| BP | 1902 positive regulation of flagellated sperm<br>motility                | 3/292 | 233 | 039  | 057  | 3 |
|    | 093                                                                      |       | 28  | 275  | 747  |   |
|    | GO:                                                                      |       | 12/ | 0.00 | 0.00 |   |
| BP | 1902 semaphorin-plexin signaling pathway<br>involved in axon guidance    | 3/292 | 233 | 039  | 057  | 3 |
|    | 287                                                                      |       | 28  | 275  | 747  |   |

|    |      |                                                             |        |     |      |      |   |
|----|------|-------------------------------------------------------------|--------|-----|------|------|---|
|    | GO:  |                                                             |        | 12/ | 0.00 | 0.00 |   |
| BP | 2000 | positive regulation of cilium-dependent cell motility       | 3/292  | 233 | 039  | 057  | 3 |
|    | 155  |                                                             |        | 28  | 275  | 747  |   |
|    | GO:  |                                                             |        | 12/ | 0.00 | 0.00 |   |
| BP | 2000 | regulation of CD4-positive, alpha-beta T cell proliferation | 3/292  | 233 | 039  | 057  | 3 |
|    | 561  |                                                             |        | 28  | 275  | 747  |   |
|    | GO:  |                                                             |        | 50/ | 0.00 | 0.00 |   |
| BP | 0007 | myoblast fusion                                             | 5/292  | 233 | 039  | 058  | 5 |
|    | 520  |                                                             |        | 28  | 683  | 208  |   |
|    | GO:  |                                                             |        | 50/ | 0.00 | 0.00 |   |
| BP | 0032 | icosanoid secretion                                         | 5/292  | 233 | 039  | 058  | 5 |
|    | 309  |                                                             |        | 28  | 683  | 208  |   |
|    | GO:  |                                                             |        | 50/ | 0.00 | 0.00 |   |
| BP | 0070 | negative regulation of lymphocyte apoptotic process         | 5/292  | 233 | 039  | 058  | 5 |
|    | 229  |                                                             |        | 28  | 683  | 208  |   |
|    | GO:  |                                                             |        | 177 | 0.00 | 0.00 |   |
| BP | 0016 | regulation of striated muscle tissue development            | 9/292  | /23 | 040  | 059  | 9 |
|    | 202  |                                                             |        | 328 | 811  | 767  |   |
|    | GO:  |                                                             |        | 177 | 0.00 | 0.00 |   |
| BP | 0035 | tube formation                                              | 9/292  | /23 | 040  | 059  | 9 |
|    | 148  |                                                             |        | 328 | 811  | 767  |   |
|    | GO:  |                                                             |        | 77/ | 0.00 | 0.00 |   |
| BP | 0045 | bone resorption                                             | 6/292  | 233 | 041  | 060  | 6 |
|    | 453  |                                                             |        | 28  | 133  | 144  |   |
|    | GO:  |                                                             |        | 77/ | 0.00 | 0.00 |   |
| BP | 0061 | regulation of protein tyrosine kinase activity              | 6/292  | 233 | 041  | 060  | 6 |
|    | 097  |                                                             |        | 28  | 133  | 144  |   |
|    | GO:  |                                                             |        | 299 | 0.00 | 0.00 |   |
| BP | 0046 | carboxylic acid biosynthetic process                        | 12/292 | /23 | 041  | 060  | 1 |
|    | 394  |                                                             |        | 328 | 75   | 997  | 2 |
|    | GO:  |                                                             |        | 108 | 0.00 | 0.00 |   |
| BP | 0008 | associative learning                                        | 7/292  | /23 | 042  | 062  | 7 |
|    | 306  |                                                             |        | 328 | 529  | 038  |   |
|    | GO:  |                                                             |        | 108 | 0.00 | 0.00 |   |
| BP | 0043 | regulation of potassium ion transport                       | 7/292  | /23 | 042  | 062  | 7 |
|    | 266  |                                                             |        | 328 | 529  | 038  |   |
|    | GO:  |                                                             |        | 300 | 0.00 | 0.00 |   |
| BP | 0016 | organic acid biosynthetic process                           | 12/292 | /23 | 043  | 062  | 1 |
|    | 053  |                                                             |        | 328 | 014  | 695  | 2 |
|    | GO:  |                                                             |        | 217 | 0.00 | 0.00 |   |
| BP | 0017 | protein import                                              | 10/292 | /23 | 043  | 062  | 1 |
|    | 038  |                                                             |        | 328 | 107  | 782  | 0 |

|    |      |                                                                        |        |     |      |      |   |
|----|------|------------------------------------------------------------------------|--------|-----|------|------|---|
|    | GO:  |                                                                        |        | 142 | 0.00 | 0.00 |   |
| BP | 2001 | positive regulation of cysteine-type<br>endopeptidase activity         | 8/292  | /23 | 043  | 062  | 8 |
|    | 056  |                                                                        |        | 328 | 195  | 86   |   |
|    | GO:  |                                                                        |        | 51/ | 0.00 | 0.00 |   |
| BP | 0072 | mesenchyme morphogenesis                                               | 5/292  | 233 | 043  | 063  | 5 |
|    | 132  |                                                                        |        | 28  | 55   | 327  |   |
|    | GO:  |                                                                        |        | 78/ | 0.00 | 0.00 |   |
| BP | 0003 | cardiac ventricle morphogenesis                                        | 6/292  | 233 | 044  | 064  | 6 |
|    | 208  |                                                                        |        | 28  | 099  | 074  |   |
|    | GO:  |                                                                        |        | 29/ | 0.00 | 0.00 |   |
| BP | 0003 | negative regulation of systemic arterial blood<br>pressure             | 4/292  | 233 | 044  | 064  | 4 |
|    | 085  |                                                                        |        | 28  | 625  | 736  |   |
|    | GO:  |                                                                        |        | 29/ | 0.00 | 0.00 |   |
| BP | 0003 | outflow tract septum morphogenesis                                     | 4/292  | 233 | 044  | 064  | 4 |
|    | 148  |                                                                        |        | 28  | 625  | 736  |   |
|    | GO:  |                                                                        |        | 109 | 0.00 | 0.00 |   |
| BP | 0002 | chondrocyte differentiation                                            | 7/292  | /23 | 044  | 065  | 7 |
|    | 062  |                                                                        |        | 328 | 97   | 185  |   |
|    | GO:  |                                                                        |        | 259 | 0.00 | 0.00 |   |
| BP | 0032 | regulation of ion transmembrane transporter<br>activity                | 11/292 | /23 | 045  | 065  | 1 |
|    | 412  |                                                                        |        | 328 | 027  | 218  | 1 |
|    | GO:  |                                                                        |        | 180 | 0.00 | 0.00 |   |
| BP | 0007 | Notch signaling pathway                                                | 9/292  | /23 | 046  | 066  | 9 |
|    | 219  |                                                                        |        | 328 | 121  | 698  |   |
|    | GO:  |                                                                        |        | 180 | 0.00 | 0.00 |   |
| BP | 1901 | regulation of muscle tissue development                                | 9/292  | /23 | 046  | 066  | 9 |
|    | 861  |                                                                        |        | 328 | 121  | 698  |   |
|    | GO:  |                                                                        |        | 79/ | 0.00 | 0.00 |   |
| BP | 0019 | hexose biosynthetic process                                            | 6/292  | 233 | 047  | 068  | 6 |
|    | 319  |                                                                        |        | 28  | 229  | 246  |   |
|    | GO:  |                                                                        |        | 52/ | 0.00 | 0.00 |   |
| BP | 0010 | positive regulation of glucose<br>transmembrane transport              | 5/292  | 233 | 047  | 068  | 5 |
|    | 828  |                                                                        |        | 28  | 696  | 759  |   |
|    | GO:  |                                                                        |        | 52/ | 0.00 | 0.00 |   |
| BP | 0045 | regulation of bone resorption                                          | 5/292  | 233 | 047  | 068  | 5 |
|    | 124  |                                                                        |        | 28  | 696  | 759  |   |
|    | GO:  |                                                                        |        | 52/ | 0.00 | 0.00 |   |
| BP | 1900 | regulation of cytokine production involved in<br>inflammatory response | 5/292  | 233 | 047  | 068  | 5 |
|    | 015  |                                                                        |        | 28  | 696  | 759  |   |
|    | GO:  |                                                                        |        | 261 | 0.00 | 0.00 |   |
| BP | 0001 | tissue homeostasis                                                     | 11/292 | /23 | 048  | 069  | 1 |
|    | 894  |                                                                        |        | 328 | 022  | 121  | 1 |



|    |                                                                          |        |     |      |      |   |
|----|--------------------------------------------------------------------------|--------|-----|------|------|---|
|    | GO:                                                                      |        | 261 | 0.00 | 0.00 | 1 |
| BP | 0005 monosaccharide metabolic process                                    | 11/292 | /23 | 048  | 069  | 1 |
|    | 996                                                                      |        | 328 | 022  | 121  |   |
|    | GO:                                                                      |        | 145 | 0.00 | 0.00 |   |
| BP | 0006 fatty acid biosynthetic process                                     | 8/292  | /23 | 049  | 071  | 8 |
|    | 633                                                                      |        | 328 | 654  | 414  |   |
|    | GO:                                                                      |        | 182 | 0.00 | 0.00 |   |
| BP | 0010 negative regulation of endopeptidase activity                       | 9/292  | /23 | 049  | 071  | 9 |
|    | 951                                                                      |        | 328 | 968  | 583  |   |
|    | GO:                                                                      |        | 111 | 0.00 | 0.00 |   |
| BP | 0001 neural tube closure                                                 | 7/292  | /23 | 050  | 071  | 7 |
|    | 843                                                                      |        | 328 | 185  | 583  |   |
|    | GO:                                                                      |        | 111 | 0.00 | 0.00 |   |
| BP | 0072 nephron epithelium development                                      | 7/292  | /23 | 050  | 071  | 7 |
|    | 009                                                                      |        | 328 | 185  | 583  |   |
|    | GO:                                                                      |        | 80/ | 0.00 | 0.00 |   |
| BP | 0002 somatic diversification of immune receptors                         | 6/292  | 233 | 050  | 071  | 6 |
|    | 200                                                                      |        | 28  | 53   | 583  |   |
|    | GO:                                                                      |        | 13/ | 0.00 | 0.00 |   |
| BP | 0001 ovulation from ovarian follicle                                     | 3/292  | 233 | 050  | 071  | 3 |
|    | 542                                                                      |        | 28  | 586  | 583  |   |
|    | GO:                                                                      |        | 13/ | 0.00 | 0.00 |   |
| BP | 0001 neutrophil apoptotic process                                        | 3/292  | 233 | 050  | 071  | 3 |
|    | 781                                                                      |        | 28  | 586  | 583  |   |
|    | GO:                                                                      |        | 13/ | 0.00 | 0.00 |   |
| BP | 0002 complement receptor mediated signaling pathway                      | 3/292  | 233 | 050  | 071  | 3 |
|    | 430                                                                      |        | 28  | 586  | 583  |   |
|    | GO:                                                                      |        | 13/ | 0.00 | 0.00 |   |
| BP | 0002 mast cell chemotaxis                                                | 3/292  | 233 | 050  | 071  | 3 |
|    | 551                                                                      |        | 28  | 586  | 583  |   |
|    | GO:                                                                      |        | 13/ | 0.00 | 0.00 |   |
| BP | 0003 positive regulation of cilium movement                              | 3/292  | 233 | 050  | 071  | 3 |
|    | 353                                                                      |        | 28  | 586  | 583  |   |
|    | GO:                                                                      |        | 13/ | 0.00 | 0.00 |   |
| BP | 0010 positive regulation of protein kinase A signaling                   | 3/292  | 233 | 050  | 071  | 3 |
|    | 739                                                                      |        | 28  | 586  | 583  |   |
|    | GO:                                                                      |        | 13/ | 0.00 | 0.00 |   |
| BP | 0010 positive regulation of macrophage derived foam cell differentiation | 3/292  | 233 | 050  | 071  | 3 |
|    | 744                                                                      |        | 28  | 586  | 583  |   |
|    | GO:                                                                      |        | 13/ | 0.00 | 0.00 |   |
| BP | 0015 arginine transport                                                  | 3/292  | 233 | 050  | 071  | 3 |
|    | 809                                                                      |        | 28  | 586  | 583  |   |

|    |      |                                                                            |        |      |      |       |
|----|------|----------------------------------------------------------------------------|--------|------|------|-------|
|    | GO:  |                                                                            | 13/    | 0.00 | 0.00 |       |
| BP | 0035 | CD4-positive, alpha-beta T cell proliferation                              | 3/292  | 233  | 050  | 071 3 |
|    |      | 739                                                                        |        | 28   | 586  | 583   |
|    | GO:  |                                                                            | 13/    | 0.00 | 0.00 |       |
| BP | 0045 | development of secondary sexual characteristics                            | 3/292  | 233  | 050  | 071 3 |
|    |      | 136                                                                        |        | 28   | 586  | 583   |
|    | GO:  |                                                                            | 13/    | 0.00 | 0.00 |       |
| BP | 0048 | positive regulation of astrocyte differentiation                           | 3/292  | 233  | 050  | 071 3 |
|    |      | 711                                                                        |        | 28   | 586  | 583   |
|    | GO:  |                                                                            | 13/    | 0.00 | 0.00 |       |
| BP | 0060 | positive regulation of type I interferon-mediated signaling pathway        | 3/292  | 233  | 050  | 071 3 |
|    |      | 340                                                                        |        | 28   | 586  | 583   |
|    | GO:  |                                                                            | 13/    | 0.00 | 0.00 |       |
| BP | 0060 | branching involved in labyrinthine layer morphogenesis                     | 3/292  | 233  | 050  | 071 3 |
|    |      | 670                                                                        |        | 28   | 586  | 583   |
|    | GO:  |                                                                            | 13/    | 0.00 | 0.00 |       |
| BP | 0070 | nucleotide-binding oligomerization domain containing 2 signaling pathway   | 3/292  | 233  | 050  | 071 3 |
|    |      | 431                                                                        |        | 28   | 586  | 583   |
|    | GO:  |                                                                            | 13/    | 0.00 | 0.00 |       |
| BP | 0072 | positive regulation of metanephros development                             | 3/292  | 233  | 050  | 071 3 |
|    |      | 216                                                                        |        | 28   | 586  | 583   |
|    | GO:  |                                                                            | 13/    | 0.00 | 0.00 |       |
| BP | 1902 | semaphorin-plexin signaling pathway involved in neuron projection guidance | 3/292  | 233  | 050  | 071 3 |
|    |      | 285                                                                        |        | 28   | 586  | 583   |
|    | GO:  |                                                                            | 13/    | 0.00 | 0.00 |       |
| BP | 2000 | positive regulation of steroid hormone secretion                           | 3/292  | 233  | 050  | 071 3 |
|    |      | 833                                                                        |        | 28   | 586  | 583   |
|    | GO:  |                                                                            | 350    | 0.00 | 0.00 |       |
| BP | 0045 | negative regulation of proteolysis                                         | 13/292 | /23  | 050  | 071 1 |
|    |      | 861                                                                        |        | 328  | 642  | 608 3 |
|    | GO:  |                                                                            | 30/    | 0.00 | 0.00 |       |
| BP | 0002 | mature B cell differentiation                                              | 4/292  | 233  | 050  | 071 4 |
|    |      | 335                                                                        |        | 28   | 986  | 874   |
|    | GO:  |                                                                            | 30/    | 0.00 | 0.00 |       |
| BP | 0043 | positive regulation of CD4-positive, alpha-beta T cell differentiation     | 4/292  | 233  | 050  | 071 4 |
|    |      | 372                                                                        |        | 28   | 986  | 874   |
|    | GO:  |                                                                            | 30/    | 0.00 | 0.00 |       |
| BP | 0051 | chaperone cofactor-dependent protein refolding                             | 4/292  | 233  | 050  | 071 4 |
|    |      | 085                                                                        |        | 28   | 986  | 874   |
|    | GO:  |                                                                            | 30/    | 0.00 | 0.00 |       |
| BP | 0060 | positive regulation of syncytium formation by plasma membrane fusion       | 4/292  | 233  | 050  | 071 4 |
|    |      | 143                                                                        |        | 28   | 986  | 874   |

|    |                                                  |       |     |      |      |   |
|----|--------------------------------------------------|-------|-----|------|------|---|
|    | GO:                                              |       | 53/ | 0.00 | 0.00 |   |
| BP | 0032 regulation of interferon-beta production    | 5/292 | 233 | 052  | 073  | 5 |
|    | 648                                              |       | 28  | 131  | 375  |   |
|    | GO:                                              |       | 53/ | 0.00 | 0.00 |   |
| BP | 0097 calcineurin-mediated signaling              | 5/292 | 233 | 052  | 073  | 5 |
|    | 720                                              |       | 28  | 131  | 375  |   |
|    | GO:                                              |       | 112 | 0.00 | 0.00 |   |
| BP | 0007 body fluid secretion                        | 7/292 | 123 | 052  | 074  | 7 |
|    | 589                                              |       | 328 | 967  | 496  |   |
|    | GO:                                              |       | 54/ | 0.00 | 0.00 |   |
| BP | 0046 icosanoid biosynthetic process              | 5/292 | 233 | 056  | 079  | 5 |
|    | 456                                              |       | 28  | 869  | 862  |   |
|    | GO:                                              |       | 54/ | 0.00 | 0.00 |   |
| BP | 2001 regulation of neuron migration              | 5/292 | 233 | 056  | 079  | 5 |
|    | 222                                              |       | 28  | 869  | 862  |   |
|    | GO:                                              |       | 82/ | 0.00 | 0.00 |   |
| BP | 0019 lipid storage                               | 6/292 | 233 | 057  | 080  | 6 |
|    | 915                                              |       | 28  | 668  | 738  |   |
|    | GO:                                              |       | 82/ | 0.00 | 0.00 |   |
| BP | 0030 regulation of blood coagulation             | 6/292 | 233 | 057  | 080  | 6 |
|    | 193                                              |       | 28  | 668  | 738  |   |
|    | GO:                                              |       | 82/ | 0.00 | 0.00 |   |
| BP | 0030 regulation of bone mineralization           | 6/292 | 233 | 057  | 080  | 6 |
|    | 500                                              |       | 28  | 668  | 738  |   |
|    | GO:                                              |       | 82/ | 0.00 | 0.00 |   |
| BP | 0072 nephron epithelium morphogenesis            | 6/292 | 233 | 057  | 080  | 6 |
|    | 088                                              |       | 28  | 668  | 738  |   |
|    | GO:                                              |       | 31/ | 0.00 | 0.00 |   |
| BP | 0045 negative regulation of muscle contraction   | 4/292 | 233 | 057  | 080  | 4 |
|    | 932                                              |       | 28  | 967  | 912  |   |
|    | GO: negative regulation of extrinsic apoptotic   |       | 31/ | 0.00 | 0.00 |   |
| BP | 1902 signaling pathway via death domain          | 4/292 | 233 | 057  | 080  | 4 |
|    | 042 receptors                                    |       | 28  | 967  | 912  |   |
|    | GO:                                              |       | 31/ | 0.00 | 0.00 |   |
| BP | 1905 semi-lunar valve development                | 4/292 | 233 | 057  | 080  | 4 |
|    | 314                                              |       | 28  | 967  | 912  |   |
|    | GO:                                              |       | 31/ | 0.00 | 0.00 |   |
| BP | 1905 positive regulation of macrophage migration | 4/292 | 233 | 057  | 080  | 4 |
|    | 523                                              |       | 28  | 967  | 912  |   |
|    | GO:                                              |       | 186 | 0.00 | 0.00 |   |
| BP | 0046 regulation of JNK cascade                   | 9/292 | 123 | 058  | 081  | 9 |
|    | 328                                              |       | 328 | 452  | 527  |   |

|    |      |                                                             |        |      |      |      |  |  |   |
|----|------|-------------------------------------------------------------|--------|------|------|------|--|--|---|
|    | GO:  |                                                             | 498    | 0.00 | 0.00 |      |  |  |   |
| BP | 1901 | organic hydroxy compound metabolic process                  | 16/292 | /23  | 058  | 081  |  |  | 1 |
|    | 615  |                                                             |        | 328  | 756  | 889  |  |  | 6 |
|    | GO:  |                                                             |        | 450  | 0.00 | 0.00 |  |  |   |
| BP | 0042 | regulation of membrane potential                            | 15/292 | /23  | 059  | 083  |  |  | 1 |
|    | 391  |                                                             |        | 328  | 609  | 014  |  |  | 5 |
|    | GO:  |                                                             |        | 83/  | 0.00 | 0.00 |  |  |   |
| BP | 1900 | regulation of hemostasis                                    | 6/292  | 233  | 061  | 085  |  |  | 6 |
|    | 046  |                                                             |        | 28   | 518  | 544  |  |  |   |
|    | GO:  |                                                             |        | 83/  | 0.00 | 0.00 |  |  |   |
| BP | 1903 | negative regulation of viral life cycle                     | 6/292  | 233  | 061  | 085  |  |  | 6 |
|    | 901  |                                                             |        | 28   | 518  | 544  |  |  |   |
|    | GO:  |                                                             |        | 55/  | 0.00 | 0.00 |  |  |   |
| BP | 0002 | cell migration involved in sprouting angiogenesis           | 5/292  | 233  | 061  | 085  |  |  | 5 |
|    | 042  |                                                             |        | 28   | 923  | 913  |  |  |   |
|    | GO:  |                                                             |        | 55/  | 0.00 | 0.00 |  |  |   |
| BP | 0033 | membrane protein proteolysis                                | 5/292  | 233  | 061  | 085  |  |  | 5 |
|    | 619  |                                                             |        | 28   | 923  | 913  |  |  |   |
|    | GO:  |                                                             |        | 55/  | 0.00 | 0.00 |  |  |   |
| BP | 0045 | positive regulation of axon extension                       | 5/292  | 233  | 061  | 085  |  |  | 5 |
|    | 773  |                                                             |        | 28   | 923  | 913  |  |  |   |
|    | GO:  |                                                             |        | 150  | 0.00 | 0.00 |  |  |   |
| BP | 0034 | cellular response to reactive oxygen species                | 8/292  | /23  | 062  | 086  |  |  | 8 |
|    | 614  |                                                             |        | 328  | 143  | 153  |  |  |   |
|    | GO:  |                                                             |        | 270  | 0.00 | 0.00 |  |  |   |
| BP | 0022 | regulation of transmembrane transporter activity            | 11/292 | /23  | 063  | 087  |  |  | 1 |
|    | 898  |                                                             |        | 328  | 643  | 447  |  |  | 1 |
|    | GO:  |                                                             |        | 14/  | 0.00 | 0.00 |  |  |   |
| BP | 0002 | MyD88-independent toll-like receptor signaling pathway      | 3/292  | 233  | 063  | 087  |  |  | 3 |
|    | 756  |                                                             |        | 28   | 787  | 447  |  |  |   |
|    | GO:  |                                                             |        | 14/  | 0.00 | 0.00 |  |  |   |
| BP | 0014 | tonic smooth muscle contraction                             | 3/292  | 233  | 063  | 087  |  |  | 3 |
|    | 820  |                                                             |        | 28   | 787  | 447  |  |  |   |
|    | GO:  |                                                             |        | 14/  | 0.00 | 0.00 |  |  |   |
| BP | 0032 | regulation of gonadotropin secretion                        | 3/292  | 233  | 063  | 087  |  |  | 3 |
|    | 276  |                                                             |        | 28   | 787  | 447  |  |  |   |
|    | GO:  |                                                             |        | 14/  | 0.00 | 0.00 |  |  |   |
| BP | 0032 | response to peptidoglycan                                   | 3/292  | 233  | 063  | 087  |  |  | 3 |
|    | 494  |                                                             |        | 28   | 787  | 447  |  |  |   |
|    | GO:  |                                                             |        | 14/  | 0.00 | 0.00 |  |  |   |
| BP | 0032 | granulocyte macrophage colony-stimulating factor production | 3/292  | 233  | 063  | 087  |  |  | 3 |
|    | 604  |                                                             |        | 28   | 787  | 447  |  |  |   |

|    |      |                                                                           |       |      |      |       |
|----|------|---------------------------------------------------------------------------|-------|------|------|-------|
|    | GO:  |                                                                           | 14/   | 0.00 | 0.00 |       |
| BP | 0032 | regulation of granulocyte macrophage colony-stimulating factor production | 3/292 | 233  | 063  | 087 3 |
|    | 645  |                                                                           |       | 28   | 787  | 447   |
|    | GO:  |                                                                           | 14/   | 0.00 | 0.00 |       |
| BP | 0034 | positive regulation of heterotypic cell-cell adhesion                     | 3/292 | 233  | 063  | 087 3 |
|    | 116  |                                                                           |       | 28   | 787  | 447   |
|    | GO:  |                                                                           | 14/   | 0.00 | 0.00 |       |
| BP | 0042 | regulation of cytokine biosynthetic process                               | 3/292 | 233  | 063  | 087 3 |
|    | 035  |                                                                           |       | 28   | 787  | 447   |
|    | GO:  |                                                                           | 14/   | 0.00 | 0.00 |       |
| BP | 0042 | fat-soluble vitamin biosynthetic process                                  | 3/292 | 233  | 063  | 087 3 |
|    | 362  |                                                                           |       | 28   | 787  | 447   |
|    | GO:  |                                                                           | 14/   | 0.00 | 0.00 |       |
| BP | 0061 | regulation of type B pancreatic cell proliferation                        | 3/292 | 233  | 063  | 087 3 |
|    | 469  |                                                                           |       | 28   | 787  | 447   |
|    | GO:  |                                                                           | 14/   | 0.00 | 0.00 |       |
| BP | 0070 | nucleotide-binding oligomerization domain containing signaling pathway    | 3/292 | 233  | 063  | 087 3 |
|    | 423  |                                                                           |       | 28   | 787  | 447   |
|    | GO:  |                                                                           | 14/   | 0.00 | 0.00 |       |
| BP | 0097 | mast cell migration                                                       | 3/292 | 233  | 063  | 087 3 |
|    | 531  |                                                                           |       | 28   | 787  | 447   |
|    | GO:  |                                                                           | 14/   | 0.00 | 0.00 |       |
| BP | 2000 | positive regulation of hepatocyte proliferation                           | 3/292 | 233  | 063  | 087 3 |
|    | 347  |                                                                           |       | 28   | 787  | 447   |
|    | GO:  |                                                                           | 14/   | 0.00 | 0.00 |       |
| BP | 2001 | regulation of unsaturated fatty acid biosynthetic process                 | 3/292 | 233  | 063  | 087 3 |
|    | 279  |                                                                           |       | 28   | 787  | 447   |
|    | GO:  |                                                                           | 189/  | 0.00 | 0.00 |       |
| BP | 0001 | neuron migration                                                          | 9/292 | 723  | 065  | 089 9 |
|    | 764  |                                                                           |       | 328  | 561  | 751   |
|    | GO:  |                                                                           | 84/   | 0.00 | 0.00 |       |
| BP | 0072 | nephron morphogenesis                                                     | 6/292 | 233  | 065  | 089 6 |
|    | 028  |                                                                           |       | 28   | 565  | 751   |
|    | GO:  |                                                                           | 56/   | 0.00 | 0.00 |       |
| BP | 0035 | cellular response to vascular endothelial growth factor stimulus          | 5/292 | 233  | 067  | 091 5 |
|    | 924  |                                                                           |       | 28   | 306  | 795   |
|    | GO:  |                                                                           | 56/   | 0.00 | 0.00 |       |
| BP | 0045 | negative regulation of fat cell differentiation                           | 5/292 | 233  | 067  | 091 5 |
|    | 599  |                                                                           |       | 28   | 306  | 795   |
|    | GO:  |                                                                           | 56/   | 0.00 | 0.00 |       |
| BP | 0071 | icosanoid transport                                                       | 5/292 | 233  | 067  | 091 5 |
|    | 715  |                                                                           |       | 28   | 306  | 795   |

|    |                                                                             |       |     |      |      |   |
|----|-----------------------------------------------------------------------------|-------|-----|------|------|---|
|    | GO:                                                                         |       | 56/ | 0.00 | 0.00 |   |
| BP | 0098 cellular response to virus                                             | 5/292 | 233 | 067  | 091  | 5 |
|    | 586                                                                         |       | 28  | 306  | 795  |   |
|    | GO:                                                                         |       | 56/ | 0.00 | 0.00 |   |
| BP | 1901 fatty acid derivative transport                                        | 5/292 | 233 | 067  | 091  | 5 |
|    | 571                                                                         |       | 28  | 306  | 795  |   |
|    | GO:                                                                         |       | 85/ | 0.00 | 0.00 |   |
| BP | 0006 dicarboxylic acid transport                                            | 6/292 | 233 | 069  | 095  | 6 |
|    | 835                                                                         |       | 28  | 814  | 075  |   |
|    | GO:                                                                         |       | 85/ | 0.00 | 0.00 |   |
| BP | 0046 monosaccharide biosynthetic process                                    | 6/292 | 233 | 069  | 095  | 6 |
|    | 364                                                                         |       | 28  | 814  | 075  |   |
|    | GO:                                                                         |       | 153 | 0.00 | 0.00 |   |
| BP | 0055 lipid homeostasis                                                      | 8/292 | 123 | 070  | 096  | 8 |
|    | 088                                                                         |       | 328 | 778  | 315  |   |
|    | GO:                                                                         |       | 118 | 0.00 | 0.00 |   |
| BP | 0014 primary neural tube formation                                          | 7/292 | 123 | 072  | 098  | 7 |
|    | 020                                                                         |       | 328 | 345  | 376  |   |
|    | GO:                                                                         |       | 57/ | 0.00 | 0.00 |   |
| BP | 0046 positive regulation of organ growth                                    | 5/292 | 233 | 073  | 099  | 5 |
|    | 622                                                                         |       | 28  | 032  | 164  |   |
|    | GO:                                                                         |       | 57/ | 0.00 | 0.00 |   |
| BP | 0055 sodium ion homeostasis                                                 | 5/292 | 233 | 073  | 099  | 5 |
|    | 078                                                                         |       | 28  | 032  | 164  |   |
|    | GO:                                                                         |       | 33/ | 0.00 | 0.00 |   |
| BP | 0003 regulation of systemic arterial blood pressure<br>by renin-angiotensin | 4/292 | 233 | 073  | 099  | 4 |
|    | 081                                                                         |       | 28  | 92   | 928  |   |
|    | GO:                                                                         |       | 33/ | 0.00 | 0.00 |   |
| BP | 0022 extracellular matrix disassembly                                       | 4/292 | 233 | 073  | 099  | 4 |
|    | 617                                                                         |       | 28  | 92   | 928  |   |
|    | GO:                                                                         |       | 33/ | 0.00 | 0.00 |   |
| BP | 0032 negative regulation of organic acid transport                          | 4/292 | 233 | 073  | 099  | 4 |
|    | 891                                                                         |       | 28  | 92   | 928  |   |
|    | GO:                                                                         |       | 33/ | 0.00 | 0.00 |   |
| BP | 0033 mammary gland epithelial cell proliferation                            | 4/292 | 233 | 073  | 099  | 4 |
|    | 598                                                                         |       | 28  | 92   | 928  |   |
|    | GO:                                                                         |       | 33/ | 0.00 | 0.00 |   |
| BP | 0060 prostate gland epithelium morphogenesis                                | 4/292 | 233 | 073  | 099  | 4 |
|    | 740                                                                         |       | 28  | 92   | 928  |   |
|    | GO:                                                                         |       | 33/ | 0.00 | 0.00 |   |
| BP | 0060 negative regulation of gene silencing                                  | 4/292 | 233 | 073  | 099  | 4 |
|    | 969                                                                         |       | 28  | 92   | 928  |   |

|    |                                                                                           |        |     |      |      |   |
|----|-------------------------------------------------------------------------------------------|--------|-----|------|------|---|
|    | GO:                                                                                       |        | 86/ | 0.00 | 0.00 |   |
| BP | 0003 ventricular septum development                                                       | 6/292  | 233 | 074  | 100  | 6 |
|    | 281                                                                                       |        | 28  | 274  | 26   |   |
|    | GO:                                                                                       |        | 86/ | 0.00 | 0.00 |   |
| BP | 0050 regulation of coagulation                                                            | 6/292  | 233 | 074  | 100  | 6 |
|    | 818                                                                                       |        | 28  | 274  | 26   |   |
|    | GO:                                                                                       |        | 276 | 0.00 | 0.00 |   |
| BP | 0034 cellular response to oxidative stress                                                | 11/292 | /23 | 076  | 102  | 1 |
|    | 599                                                                                       |        | 328 | 247  | 847  | 1 |
|    | GO:                                                                                       |        | 155 | 0.00 | 0.00 |   |
| BP | 0001 embryonic epithelial tube formation                                                  | 8/292  | /23 | 077  | 103  | 8 |
|    | 838                                                                                       |        | 328 | 053  | 859  |   |
|    | GO:                                                                                       |        | 277 | 0.00 | 0.00 |   |
| BP | 0003 heart morphogenesis                                                                  | 11/292 | /23 | 078  | 105  | 1 |
|    | 007                                                                                       |        | 328 | 536  | 326  | 1 |
|    | GO:                                                                                       |        | 15/ | 0.00 | 0.00 |   |
| BP | 0006 activation-induced cell death of T cells                                             | 3/292  | 233 | 078  | 105  | 3 |
|    | 924                                                                                       |        | 28  | 998  | 326  |   |
|    | GO:                                                                                       |        | 15/ | 0.00 | 0.00 |   |
| BP | 0010 regulation of extracellular matrix disassembly                                       | 3/292  | 233 | 078  | 105  | 3 |
|    | 715                                                                                       |        | 28  | 998  | 326  |   |
|    | GO:                                                                                       |        | 15/ | 0.00 | 0.00 |   |
| BP | 0023 CD40 signaling pathway                                                               | 3/292  | 233 | 078  | 105  | 3 |
|    | 035                                                                                       |        | 28  | 998  | 326  |   |
|    | GO:                                                                                       |        | 15/ | 0.00 | 0.00 |   |
| BP | 0030 regulation of vitamin metabolic process                                              | 3/292  | 233 | 078  | 105  | 3 |
|    | 656                                                                                       |        | 28  | 998  | 326  |   |
|    | GO:                                                                                       |        | 15/ | 0.00 | 0.00 |   |
| BP | 0032 regulation of synaptic transmission, cholinergic                                     | 3/292  | 233 | 078  | 105  | 3 |
|    | 222                                                                                       |        | 28  | 998  | 326  |   |
|    | GO:                                                                                       |        | 15/ | 0.00 | 0.00 |   |
| BP | 0032 positive regulation of prostaglandin secretion                                       | 3/292  | 233 | 078  | 105  | 3 |
|    | 308                                                                                       |        | 28  | 998  | 326  |   |
|    | GO:                                                                                       |        | 15/ | 0.00 | 0.00 |   |
| BP | 0035 nucleotide-binding domain, leucine rich repeat containing receptor signaling pathway | 3/292  | 233 | 078  | 105  | 3 |
|    | 872                                                                                       |        | 28  | 998  | 326  |   |
|    | GO:                                                                                       |        | 15/ | 0.00 | 0.00 |   |
| BP | 0042 cytokine biosynthetic process                                                        | 3/292  | 233 | 078  | 105  | 3 |
|    | 089                                                                                       |        | 28  | 998  | 326  |   |
|    | GO:                                                                                       |        | 15/ | 0.00 | 0.00 |   |
| BP | 0042 activation of Janus kinase activity                                                  | 3/292  | 233 | 078  | 105  | 3 |
|    | 976                                                                                       |        | 28  | 998  | 326  |   |

|    |      |                                                          |        |      |      |       |
|----|------|----------------------------------------------------------|--------|------|------|-------|
|    | GO:  |                                                          | 15/    | 0.00 | 0.00 |       |
| BP | 0043 | negative regulation of macrophage activation             | 3/292  | 233  | 078  | 105 3 |
|    | 031  |                                                          |        | 28   | 998  | 326   |
|    | GO:  |                                                          | 15/    | 0.00 | 0.00 |       |
| BP | 0045 | positive regulation of action potential                  | 3/292  | 233  | 078  | 105 3 |
|    | 760  |                                                          |        | 28   | 998  | 326   |
|    | GO:  |                                                          | 15/    | 0.00 | 0.00 |       |
| BP | 0046 | saliva secretion                                         | 3/292  | 233  | 078  | 105 3 |
|    | 541  |                                                          |        | 28   | 998  | 326   |
|    | GO:  |                                                          | 15/    | 0.00 | 0.00 |       |
| BP | 0061 | vascular wound healing                                   | 3/292  | 233  | 078  | 105 3 |
|    | 042  |                                                          |        | 28   | 998  | 326   |
|    | GO:  |                                                          | 15/    | 0.00 | 0.00 |       |
| BP | 0090 | inflammatory response to wounding                        | 3/292  | 233  | 078  | 105 3 |
|    | 594  |                                                          |        | 28   | 998  | 326   |
|    | GO:  |                                                          | 58/    | 0.00 | 0.00 |       |
| BP | 0043 | response to exogenous dsRNA                              | 5/292  | 233  | 079  | 105 5 |
|    | 330  |                                                          |        | 28   | 114  | 33    |
|    | GO:  |                                                          | 58/    | 0.00 | 0.00 |       |
| BP | 0045 | negative regulation of viral genome replication          | 5/292  | 233  | 079  | 105 5 |
|    | 071  |                                                          |        | 28   | 114  | 33    |
|    | GO:  |                                                          | 463    | 0.00 | 0.00 |       |
| BP | 0015 | organic anion transport                                  | 15/292 | /23  | 079  | 105 1 |
|    | 711  |                                                          |        | 328  | 632  | 942 5 |
|    | GO:  |                                                          | 278    | 0.00 | 0.00 |       |
| BP | 0010 | regulation of autophagy                                  | 11/292 | /23  | 080  | 107 1 |
|    | 506  |                                                          |        | 328  | 883  | 529 1 |
|    | GO:  |                                                          | 34/    | 0.00 | 0.00 |       |
| BP | 0003 | cardiac atrium morphogenesis                             | 4/292  | 233  | 082  | 109 4 |
|    | 209  |                                                          |        | 28   | 958  | 892   |
|    | GO:  |                                                          | 34/    | 0.00 | 0.00 |       |
| BP | 0032 | negative regulation of interferon-gamma production       | 4/292  | 233  | 082  | 109 4 |
|    | 689  |                                                          |        | 28   | 958  | 892   |
|    | GO:  |                                                          | 34/    | 0.00 | 0.00 |       |
| BP | 0048 | regulation of astrocyte differentiation                  | 4/292  | 233  | 082  | 109 4 |
|    | 710  |                                                          |        | 28   | 958  | 892   |
|    | GO:  |                                                          | 34/    | 0.00 | 0.00 |       |
| BP | 0060 | prostate gland morphogenesis                             | 4/292  | 233  | 082  | 109 4 |
|    | 512  |                                                          |        | 28   | 958  | 892   |
|    | GO:  |                                                          | 34/    | 0.00 | 0.00 |       |
| BP | 0071 | regulation of transforming growth factor beta production | 4/292  | 233  | 082  | 109 4 |
|    | 634  |                                                          |        | 28   | 958  | 892   |



|    |                                                       |        |     |      |      |   |
|----|-------------------------------------------------------|--------|-----|------|------|---|
|    | GO:                                                   |        | 88/ | 0.00 | 0.00 |   |
| BP | 0042 odontogenesis of dentin-containing tooth         | 6/292  | 233 | 083  | 110  | 6 |
|    | 475                                                   |        | 28  | 852  | 997  |   |
|    | GO:                                                   |        | 196 | 0.00 | 0.00 |   |
| BP | 0042 hormone metabolic process                        | 9/292  | /23 | 084  | 112  | 9 |
|    | 445                                                   |        | 328 | 923  | 334  |   |
|    | GO:                                                   |        | 418 | 0.00 | 0.00 |   |
| BP | 0001 eye development                                  | 14/292 | /23 | 086  | 113  | 1 |
|    | 654                                                   |        | 328 | 034  | 722  | 4 |
|    | GO:                                                   |        | 122 | 0.00 | 0.00 |   |
| BP | 0045 positive regulation of endocytosis               | 7/292  | /23 | 088  | 116  | 7 |
|    | 807                                                   |        | 328 | 112  | 385  |   |
|    | GO:                                                   |        | 89/ | 0.00 | 0.00 |   |
| BP | 0042 mechanoreceptor differentiation                  | 6/292  | 233 | 088  | 117  | 6 |
|    | 490                                                   |        | 28  | 985  | 37   |   |
|    | GO:                                                   |        | 89/ | 0.00 | 0.00 |   |
| BP | 0070 cellular response to hydrogen peroxide           | 6/292  | 233 | 088  | 117  | 6 |
|    | 301                                                   |        | 28  | 985  | 37   |   |
|    | GO:                                                   |        | 60/ | 0.00 | 0.00 |   |
| BP | 0060 labyrinthine layer development                   | 5/292  | 233 | 092  | 121  | 5 |
|    | 711                                                   |        | 28  | 402  | 638  |   |
|    | GO:                                                   |        | 60/ | 0.00 | 0.00 |   |
| BP | 0098 regulation of action potential                   | 5/292  | 233 | 092  | 121  | 5 |
|    | 900                                                   |        | 28  | 402  | 638  |   |
|    | GO:                                                   |        | 123 | 0.00 | 0.00 |   |
| BP | 0008 insulin receptor signaling pathway               | 7/292  | /23 | 092  | 121  | 7 |
|    | 286                                                   |        | 328 | 448  | 638  |   |
|    | GO:                                                   |        | 35/ | 0.00 | 0.00 |   |
| BP | 0006 'de novo' protein folding                        | 4/292  | 233 | 092  | 121  | 4 |
|    | 458                                                   |        | 28  | 748  | 638  |   |
|    | GO:                                                   |        | 35/ | 0.00 | 0.00 |   |
| BP | 0045 positive regulation of smooth muscle contraction | 4/292  | 233 | 092  | 121  | 4 |
|    | 987                                                   |        | 28  | 748  | 638  |   |
|    | GO:                                                   |        | 35/ | 0.00 | 0.00 |   |
| BP | 0051 'de novo' posttranslational protein folding      | 4/292  | 233 | 092  | 121  | 4 |
|    | 084                                                   |        | 28  | 748  | 638  |   |
|    | GO:                                                   |        | 35/ | 0.00 | 0.00 |   |
| BP | 0055 acylglycerol homeostasis                         | 4/292  | 233 | 092  | 121  | 4 |
|    | 090                                                   |        | 28  | 748  | 638  |   |
|    | GO:                                                   |        | 35/ | 0.00 | 0.00 |   |
| BP | 0070 triglyceride homeostasis                         | 4/292  | 233 | 092  | 121  | 4 |
|    | 328                                                   |        | 28  | 748  | 638  |   |

|    |                                                     |        |     |      |      |  |   |
|----|-----------------------------------------------------|--------|-----|------|------|--|---|
|    | GO:                                                 |        | 422 | 0.00 | 0.00 |  | 1 |
| BP | 0150 visual system development                      | 14/292 | /23 | 094  | 123  |  | 4 |
|    | 063                                                 |        | 328 | 249  | 483  |  |   |
|    | GO:                                                 |        | 90/ | 0.00 | 0.00 |  |   |
| BP | 1900 regulation of cellular response to insulin     | 6/292  | 233 | 094  | 123  |  | 6 |
|    | 076 stimulus                                        |        | 28  | 356  | 483  |  |   |
|    | GO:                                                 |        | 90/ | 0.00 | 0.00 |  |   |
| BP | 1903 negative regulation of response to wounding    | 6/292  | 233 | 094  | 123  |  | 6 |
|    | 035                                                 |        | 28  | 356  | 483  |  |   |
|    | GO:                                                 |        | 16/ | 0.00 | 0.00 |  |   |
| BP | 0015 basic amino acid transport                     | 3/292  | 233 | 096  | 125  |  | 3 |
|    | 802                                                 |        | 28  | 331  | 357  |  |   |
|    | GO:                                                 |        | 16/ | 0.00 | 0.00 |  |   |
| BP | 0030 male sex determination                         | 3/292  | 233 | 096  | 125  |  | 3 |
|    | 238                                                 |        | 28  | 331  | 357  |  |   |
|    | GO:                                                 |        | 16/ | 0.00 | 0.00 |  |   |
| BP | 0051 positive regulation of membrane protein        | 3/292  | 233 | 096  | 125  |  | 3 |
|    | 044 ectodomain proteolysis                          |        | 28  | 331  | 357  |  |   |
|    | GO:                                                 |        | 16/ | 0.00 | 0.00 |  |   |
| BP | 0051 regulation of killing of cells of other        | 3/292  | 233 | 096  | 125  |  | 3 |
|    | 709 organism                                        |        | 28  | 331  | 357  |  |   |
|    | GO:                                                 |        | 16/ | 0.00 | 0.00 |  |   |
| BP | 0070 positive regulation of neuron projection       | 3/292  | 233 | 096  | 125  |  | 3 |
|    | 572 regeneration                                    |        | 28  | 331  | 357  |  |   |
|    | GO:                                                 |        | 16/ | 0.00 | 0.00 |  |   |
| BP | 0072 fibroblast activation                          | 3/292  | 233 | 096  | 125  |  | 3 |
|    | 537                                                 |        | 28  | 331  | 357  |  |   |
|    | GO:                                                 |        | 16/ | 0.00 | 0.00 |  |   |
| BP | 1902 regulation of apoptotic process involved in    | 3/292  | 233 | 096  | 125  |  | 3 |
|    | 337 morphogenesis                                   |        | 28  | 331  | 357  |  |   |
|    | GO:                                                 |        | 16/ | 0.00 | 0.00 |  |   |
| BP | 2000 negative regulation of stem cell proliferation | 3/292  | 233 | 096  | 125  |  | 3 |
|    | 647                                                 |        | 28  | 331  | 357  |  |   |
|    | GO:                                                 |        | 241 | 0.00 | 0.00 |  |   |
| BP | 0046 protein autophosphorylation                    | 10/292 | /23 | 096  | 125  |  | 1 |
|    | 777                                                 |        | 328 | 824  | 91   |  | 0 |
|    | GO:                                                 |        | 200 | 0.00 | 0.00 |  |   |
| BP | 0051 positive regulation of binding                 | 9/292  | /23 | 097  | 127  |  | 9 |
|    | 099                                                 |        | 328 | 926  | 253  |  |   |
|    | GO:                                                 |        | 161 | 0.00 | 0.00 |  |   |
| BP | 0009 hormone-mediated signaling pathway             | 8/292  | /23 | 098  | 128  |  | 8 |
|    | 755                                                 |        | 328 | 608  | 049  |  |   |

|    |                                                         |        |     |      |      |   |
|----|---------------------------------------------------------|--------|-----|------|------|---|
|    | GO:                                                     |        | 61/ | 0.00 | 0.00 |   |
| BP | 0048 lung alveolus development                          | 5/292  | 233 | 099  | 129  | 5 |
|    | 286                                                     |        | 28  | 636  | 293  |   |
|    | GO:                                                     |        | 426 | 0.00 | 0.00 |   |
| BP | 0048 sensory system development                         | 14/292 | /23 | 103  | 133  | 1 |
|    | 880                                                     |        | 328 | 115  | 608  | 4 |
|    | GO:                                                     |        | 36/ | 0.00 | 0.00 |   |
| BP | 0031 hair follicle morphogenesis                        | 4/292  | 233 | 103  | 133  | 4 |
|    | 069                                                     |        | 28  | 323  | 608  |   |
|    | GO:                                                     |        | 36/ | 0.00 | 0.00 |   |
| BP | 0034 toll-like receptor 4 signaling pathway             | 4/292  | 233 | 103  | 133  | 4 |
|    | 142                                                     |        | 28  | 323  | 608  |   |
|    | GO:                                                     |        | 36/ | 0.00 | 0.00 |   |
| BP | 0061 heart trabecula morphogenesis                      | 4/292  | 233 | 103  | 133  | 4 |
|    | 384                                                     |        | 28  | 323  | 608  |   |
|    | GO:                                                     |        | 36/ | 0.00 | 0.00 |   |
| BP | 0071 transforming growth factor beta production         | 4/292  | 233 | 103  | 133  | 4 |
|    | 604                                                     |        | 28  | 323  | 608  |   |
|    | GO:                                                     |        | 332 | 0.00 | 0.00 |   |
| BP | 0062 cellular response to chemical stress               | 12/292 | /23 | 104  | 134  | 1 |
|    | 197                                                     |        | 328 | 354  | 847  | 2 |
|    | GO:                                                     |        | 92/ | 0.00 | 0.00 |   |
| BP | 0002 negative regulation of response to biotic stimulus | 6/292  | 233 | 105  | 136  | 6 |
|    | 832                                                     |        | 28  | 843  | 579  |   |
|    | GO:                                                     |        | 92/ | 0.00 | 0.00 |   |
| BP | 0043 regulation of multi-organism process               | 6/292  | 233 | 105  | 136  | 6 |
|    | 900                                                     |        | 28  | 843  | 579  |   |
|    | GO:                                                     |        | 126 | 0.00 | 0.00 |   |
| BP | 0046 regulation of nucleocytoplasmic transport          | 7/292  | /23 | 106  | 137  | 7 |
|    | 822                                                     |        | 328 | 471  | 294  |   |
|    | GO:                                                     |        | 62/ | 0.00 | 0.00 |   |
| BP | 0051 negative regulation of calcium ion transport       | 5/292  | 233 | 107  | 138  | 5 |
|    | 926                                                     |        | 28  | 282  | 146  |   |
|    | GO:                                                     |        | 62/ | 0.00 | 0.00 |   |
| BP | 1905 regulation of cardiocyte differentiation           | 5/292  | 233 | 107  | 138  | 5 |
|    | 207                                                     |        | 28  | 282  | 146  |   |
|    | GO:                                                     |        | 203 | 0.00 | 0.00 |   |
| BP | 0009 response to carbohydrate                           | 9/292  | /23 | 108  | 139  | 9 |
|    | 743                                                     |        | 328 | 701  | 876  |   |
|    | GO:                                                     |        | 127 | 0.00 | 0.00 |   |
| BP | 0014 myotube differentiation                            | 7/292  | /23 | 111  | 143  | 7 |
|    | 902                                                     |        | 328 | 5    | 377  |   |

|    |                                                                                     |        |     |      |      |   |
|----|-------------------------------------------------------------------------------------|--------|-----|------|------|---|
|    | GO:                                                                                 |        | 93/ | 0.00 | 0.00 |   |
| BP | 0033 T cell differentiation in thymus                                               | 6/292  | 233 | 111  | 143  | 6 |
|    | 077                                                                                 |        | 28  | 974  | 887  |   |
|    | GO:                                                                                 |        | 246 | 0.00 | 0.00 |   |
| BP | 0010 negative regulation of peptidase activity                                      | 10/292 | 723 | 113  | 145  | 1 |
|    | 466                                                                                 |        | 328 | 051  | 17   | 0 |
|    | GO:                                                                                 |        | 37/ | 0.00 | 0.00 |   |
| BP | 0002 positive regulation of mesenchymal cell proliferation                          | 4/292  | 233 | 114  | 147  | 4 |
|    | 053                                                                                 |        | 28  | 718  | 003  |   |
|    | GO:                                                                                 |        | 37/ | 0.00 | 0.00 |   |
| BP | 0002 regulation of cellular extravasation                                           | 4/292  | 233 | 114  | 147  | 4 |
|    | 691                                                                                 |        | 28  | 718  | 003  |   |
|    | GO:                                                                                 |        | 37/ | 0.00 | 0.00 |   |
| BP | 0002 regulation of humoral immune response                                          | 4/292  | 233 | 114  | 147  | 4 |
|    | 920                                                                                 |        | 28  | 718  | 003  |   |
|    | GO:                                                                                 |        | 63/ | 0.00 | 0.00 |   |
| BP | 0060 cardiac muscle cell proliferation                                              | 5/292  | 233 | 115  | 147  | 5 |
|    | 038                                                                                 |        | 28  | 355  | 182  |   |
|    | GO:                                                                                 |        | 17/ | 0.00 | 0.00 |   |
| BP | 0002 diet induced thermogenesis                                                     | 3/292  | 233 | 115  | 147  | 3 |
|    | 024                                                                                 |        | 28  | 895  | 182  |   |
|    | GO:                                                                                 |        | 17/ | 0.00 | 0.00 |   |
| BP | 0002 Fc receptor mediated stimulatory signaling pathway                             | 3/292  | 233 | 115  | 147  | 3 |
|    | 431                                                                                 |        | 28  | 895  | 182  |   |
|    | GO:                                                                                 |        | 17/ | 0.00 | 0.00 |   |
| BP | 0003 epithelial to mesenchymal transition involved in endocardial cushion formation | 3/292  | 233 | 115  | 147  | 3 |
|    | 198                                                                                 |        | 28  | 895  | 182  |   |
|    | GO:                                                                                 |        | 17/ | 0.00 | 0.00 |   |
| BP | 0006 cellular defense response                                                      | 3/292  | 233 | 115  | 147  | 3 |
|    | 968                                                                                 |        | 28  | 895  | 182  |   |
|    | GO:                                                                                 |        | 17/ | 0.00 | 0.00 |   |
| BP | 0032 regulation of prostaglandin secretion                                          | 3/292  | 233 | 115  | 147  | 3 |
|    | 306                                                                                 |        | 28  | 895  | 182  |   |
|    | GO:                                                                                 |        | 17/ | 0.00 | 0.00 |   |
| BP | 0042 drinking behavior                                                              | 3/292  | 233 | 115  | 147  | 3 |
|    | 756                                                                                 |        | 28  | 895  | 182  |   |
|    | GO:                                                                                 |        | 17/ | 0.00 | 0.00 |   |
| BP | 0044 cellular response to leptin stimulus                                           | 3/292  | 233 | 115  | 147  | 3 |
|    | 320                                                                                 |        | 28  | 895  | 182  |   |
|    | GO:                                                                                 |        | 17/ | 0.00 | 0.00 |   |
| BP | 0045 T-helper 2 cell differentiation                                                | 3/292  | 233 | 115  | 147  | 3 |
|    | 064                                                                                 |        | 28  | 895  | 182  |   |

|    |      |                                                           |        |      |      |     |   |
|----|------|-----------------------------------------------------------|--------|------|------|-----|---|
|    | GO:  |                                                           | 17/    | 0.00 | 0.00 |     |   |
| BP | 0070 | positive regulation of calcineurin-NFAT signaling cascade | 3/292  | 233  | 115  | 147 | 3 |
|    | 886  |                                                           |        | 28   | 895  | 182 |   |
|    | GO:  |                                                           | 17/    | 0.00 | 0.00 |     |   |
| BP | 0071 | cellular response to exogenous dsRNA                      | 3/292  | 233  | 115  | 147 | 3 |
|    | 360  |                                                           |        | 28   | 895  | 182 |   |
|    | GO:  |                                                           | 17/    | 0.00 | 0.00 |     |   |
| BP | 0106 | positive regulation of calcineurin-mediated signaling     | 3/292  | 233  | 115  | 147 | 3 |
|    | 058  |                                                           |        | 28   | 895  | 182 |   |
|    | GO:  |                                                           | 17/    | 0.00 | 0.00 |     |   |
| BP | 1904 | regulation of apoptotic process involved in development   | 3/292  | 233  | 115  | 147 | 3 |
|    | 748  |                                                           |        | 28   | 895  | 182 |   |
|    | GO:  |                                                           | 205    | 0.00 | 0.00 |     |   |
| BP | 0045 | cell-cell junction organization                           | 9/292  | /23  | 116  | 147 | 9 |
|    | 216  |                                                           |        | 328  | 403  | 727 |   |
|    | GO:  |                                                           | 166    | 0.00 | 0.00 |     |   |
| BP | 0007 | blood coagulation                                         | 8/292  | /23  | 120  | 152 | 8 |
|    | 596  |                                                           |        | 328  | 041  | 238 |   |
|    | GO:  |                                                           | 249    | 0.00 | 0.00 |     |   |
| BP | 0015 | organic hydroxy compound transport                        | 10/292 | /23  | 123  | 156 | 1 |
|    | 850  |                                                           |        | 328  | 81   | 447 | 0 |
|    | GO:  |                                                           | 64/    | 0.00 | 0.00 |     |   |
| BP | 0001 | branching involved in ureteric bud morphogenesis          | 5/292  | 233  | 123  | 156 | 5 |
|    | 658  |                                                           |        | 28   | 868  | 447 |   |
|    | GO:  |                                                           | 64/    | 0.00 | 0.00 |     |   |
| BP | 0008 | glial cell migration                                      | 5/292  | 233  | 123  | 156 | 5 |
|    | 347  |                                                           |        | 28   | 868  | 447 |   |
|    | GO:  |                                                           | 64/    | 0.00 | 0.00 |     |   |
| BP | 0030 | positive regulation of epithelial cell differentiation    | 5/292  | 233  | 123  | 156 | 5 |
|    | 858  |                                                           |        | 28   | 868  | 447 |   |
|    | GO:  |                                                           | 64/    | 0.00 | 0.00 |     |   |
| BP | 0035 | aorta development                                         | 5/292  | 233  | 123  | 156 | 5 |
|    | 904  |                                                           |        | 28   | 868  | 447 |   |
|    | GO:  |                                                           | 64/    | 0.00 | 0.00 |     |   |
| BP | 0043 | response to dsRNA                                         | 5/292  | 233  | 123  | 156 | 5 |
|    | 331  |                                                           |        | 28   | 868  | 447 |   |
|    | GO:  |                                                           | 207    | 0.00 | 0.00 |     |   |
| BP | 0031 | actomyosin structure organization                         | 9/292  | /23  | 124  | 157 | 9 |
|    | 032  |                                                           |        | 328  | 541  | 189 |   |
|    | GO:  |                                                           | 167    | 0.00 | 0.00 |     |   |
| BP | 0030 | BMP signaling pathway                                     | 8/292  | /23  | 124  | 157 | 8 |
|    | 509  |                                                           |        | 328  | 742  | 335 |   |

|    |                                                                            |        |     |      |      |   |
|----|----------------------------------------------------------------------------|--------|-----|------|------|---|
|    | GO:                                                                        |        | 95/ | 0.00 | 0.00 |   |
| BP | 0031 positive regulation of cell killing                                   | 6/292  | 233 | 125  | 157  | 6 |
|    | 343                                                                        |        | 28  | 05   | 509  |   |
|    | GO:                                                                        |        | 95/ | 0.00 | 0.00 |   |
| BP | 0051 regulation of stress fiber assembly                                   | 6/292  | 233 | 125  | 157  | 6 |
|    | 492                                                                        |        | 28  | 05   | 509  |   |
|    | GO:                                                                        |        | 38/ | 0.00 | 0.00 |   |
| BP | 0010 positive regulation of myotube differentiation                        | 4/292  | 233 | 126  | 159  | 4 |
|    | 831                                                                        |        | 28  | 964  | 375  |   |
|    | GO:                                                                        |        | 38/ | 0.00 | 0.00 |   |
| BP | 0045 positive regulation of steroid metabolic process                      | 4/292  | 233 | 126  | 159  | 4 |
|    | 940                                                                        |        | 28  | 964  | 375  |   |
|    | GO:                                                                        |        | 38/ | 0.00 | 0.00 |   |
| BP | 0051 negative regulation of amine transport                                | 4/292  | 233 | 126  | 159  | 4 |
|    | 953                                                                        |        | 28  | 964  | 375  |   |
|    | GO:                                                                        |        | 38/ | 0.00 | 0.00 |   |
| BP | 0062 positive regulation of pattern recognition receptor signaling pathway | 4/292  | 233 | 126  | 159  | 4 |
|    | 208                                                                        |        | 28  | 964  | 375  |   |
|    | GO:                                                                        |        | 38/ | 0.00 | 0.00 |   |
| BP | 0110 negative regulation of animal organ morphogenesis                     | 4/292  | 233 | 126  | 159  | 4 |
|    | 111                                                                        |        | 28  | 964  | 375  |   |
|    | GO:                                                                        |        | 168 | 0.00 | 0.00 |   |
| BP | 0007 hemostasis                                                            | 8/292  | /23 | 129  | 162  | 8 |
|    | 599                                                                        |        | 328 | 588  | 559  |   |
|    | GO:                                                                        |        | 295 | 0.00 | 0.00 |   |
| BP | 0097 intrinsic apoptotic signaling pathway                                 | 11/292 | /23 | 130  | 163  | 1 |
|    | 193                                                                        |        | 328 | 563  | 67   | 1 |
|    | GO:                                                                        |        | 96/ | 0.00 | 0.00 |   |
| BP | 0060 roof of mouth development                                             | 6/292  | 233 | 132  | 165  | 6 |
|    | 021                                                                        |        | 28  | 01   | 373  |   |
|    | GO:                                                                        |        | 169 | 0.00 | 0.00 |   |
| BP | 0050 coagulation                                                           | 8/292  | /23 | 134  | 168  | 8 |
|    | 817                                                                        |        | 328 | 584  | 368  |   |
|    | GO:                                                                        |        | 169 | 0.00 | 0.00 |   |
| BP | 0051 actin filament bundle assembly                                        | 8/292  | /23 | 134  | 168  | 8 |
|    | 017                                                                        |        | 328 | 584  | 368  |   |
|    | GO:                                                                        |        | 18/ | 0.00 | 0.00 |   |
| BP | 0002 regulation of hypersensitivity                                        | 3/292  | 233 | 137  | 170  | 3 |
|    | 883                                                                        |        | 28  | 792  | 646  |   |
|    | GO:                                                                        |        | 18/ | 0.00 | 0.00 |   |
| BP | 0003 cardiac left ventricle morphogenesis                                  | 3/292  | 233 | 137  | 170  | 3 |
|    | 214                                                                        |        | 28  | 792  | 646  |   |

|    |      |                                                                              |       |      |      |       |
|----|------|------------------------------------------------------------------------------|-------|------|------|-------|
|    | GO:  |                                                                              | 18/   | 0.00 | 0.00 |       |
| BP | 0010 | negative regulation of myotube differentiation                               | 3/292 | 233  | 137  | 170 3 |
|    | 832  |                                                                              |       | 28   | 792  | 646   |
|    | GO:  |                                                                              | 18/   | 0.00 | 0.00 |       |
| BP | 0030 | female genitalia development                                                 | 3/292 | 233  | 137  | 170 3 |
|    | 540  |                                                                              |       | 28   | 792  | 646   |
|    | GO:  |                                                                              | 18/   | 0.00 | 0.00 |       |
| BP | 0032 | regulation of interleukin-5 production                                       | 3/292 | 233  | 137  | 170 3 |
|    | 674  |                                                                              |       | 28   | 792  | 646   |
|    | GO:  |                                                                              | 18/   | 0.00 | 0.00 |       |
| BP | 0042 | regulation of odontogenesis of dentin-containing tooth                       | 3/292 | 233  | 137  | 170 3 |
|    | 487  |                                                                              |       | 28   | 792  | 646   |
|    | GO:  |                                                                              | 18/   | 0.00 | 0.00 |       |
| BP | 0042 | regulation of cell fate specification                                        | 3/292 | 233  | 137  | 170 3 |
|    | 659  |                                                                              |       | 28   | 792  | 646   |
|    | GO:  |                                                                              | 18/   | 0.00 | 0.00 |       |
| BP | 0045 | MHC class II biosynthetic process                                            | 3/292 | 233  | 137  | 170 3 |
|    | 342  |                                                                              |       | 28   | 792  | 646   |
|    | GO:  |                                                                              | 18/   | 0.00 | 0.00 |       |
| BP | 0045 | negative regulation of bone resorption                                       | 3/292 | 233  | 137  | 170 3 |
|    | 779  |                                                                              |       | 28   | 792  | 646   |
|    | GO:  |                                                                              | 18/   | 0.00 | 0.00 |       |
| BP | 0060 | morphogenesis of an epithelial bud                                           | 3/292 | 233  | 137  | 170 3 |
|    | 572  |                                                                              |       | 28   | 792  | 646   |
|    | GO:  |                                                                              | 18/   | 0.00 | 0.00 |       |
| BP | 0060 | venous blood vessel development                                              | 3/292 | 233  | 137  | 170 3 |
|    | 841  |                                                                              |       | 28   | 792  | 646   |
|    | GO:  |                                                                              | 18/   | 0.00 | 0.00 |       |
| BP | 1901 | regulation of flagellated sperm motility                                     | 3/292 | 233  | 137  | 170 3 |
|    | 317  |                                                                              |       | 28   | 792  | 646   |
|    | GO:  |                                                                              | 18/   | 0.00 | 0.00 |       |
| BP | 1904 | negative regulation of vascular associated smooth muscle cell proliferation  | 3/292 | 233  | 137  | 170 3 |
|    | 706  |                                                                              |       | 28   | 792  | 646   |
|    | GO:  |                                                                              | 18/   | 0.00 | 0.00 |       |
| BP | 2000 | regulation of epithelial cell differentiation involved in kidney development | 3/292 | 233  | 137  | 170 3 |
|    | 696  |                                                                              |       | 28   | 792  | 646   |
|    | GO:  |                                                                              | 18/   | 0.00 | 0.00 |       |
| BP | 2000 | regulation of corticosteroid hormone secretion                               | 3/292 | 233  | 137  | 170 3 |
|    | 846  |                                                                              |       | 28   | 792  | 646   |
|    | GO:  |                                                                              | 39/   | 0.00 | 0.00 |       |
| BP | 0003 | cardiac atrium development                                                   | 4/292 | 233  | 140  | 173 4 |
|    | 230  |                                                                              |       | 28   | 095  | 034   |

|    |                                                                      |        |     |      |      |   |
|----|----------------------------------------------------------------------|--------|-----|------|------|---|
|    | GO:                                                                  |        | 39/ | 0.00 | 0.00 |   |
| BP | 0021 pituitary gland development                                     | 4/292  | 233 | 140  | 173  | 4 |
|    | 983                                                                  |        | 28  | 095  | 034  |   |
|    | GO:                                                                  |        | 39/ | 0.00 | 0.00 |   |
| BP | 0032 positive regulation of ATPase activity                          | 4/292  | 233 | 140  | 173  | 4 |
|    | 781                                                                  |        | 28  | 095  | 034  |   |
|    | GO:                                                                  |        | 39/ | 0.00 | 0.00 |   |
| BP | 0090 regulation of cell migration involved in sprouting angiogenesis | 4/292  | 233 | 140  | 173  | 4 |
|    | 049                                                                  |        | 28  | 095  | 034  |   |
|    | GO:                                                                  |        | 171 | 0.00 | 0.00 |   |
| BP | 0046 male sex differentiation                                        | 8/292  | /23 | 145  | 179  | 8 |
|    | 661                                                                  |        | 328 | 033  | 013  |   |
|    | GO:                                                                  |        | 133 | 0.00 | 0.00 |   |
| BP | 0001 neural tube formation                                           | 7/292  | /23 | 145  | 179  | 7 |
|    | 841                                                                  |        | 328 | 709  | 727  |   |
|    | GO:                                                                  |        | 98/ | 0.00 | 0.00 |   |
| BP | 0072 nephron tubule development                                      | 6/292  | 233 | 146  | 180  | 6 |
|    | 080                                                                  |        | 28  | 815  | 97   |   |
|    | GO:                                                                  |        | 346 | 0.00 | 0.00 |   |
| BP | 0031 response to nutrient levels                                     | 12/292 | /23 | 148  | 182  | 1 |
|    | 667                                                                  |        | 328 | 125  | 463  | 2 |
|    | GO:                                                                  |        | 172 | 0.00 | 0.00 |   |
| BP | 0061 actin filament bundle organization                              | 8/292  | /23 | 150  | 185  | 8 |
|    | 572                                                                  |        | 328 | 494  | 258  |   |
|    | GO:                                                                  |        | 67/ | 0.00 | 0.00 |   |
| BP | 0060 lung morphogenesis                                              | 5/292  | 233 | 152  | 187  | 5 |
|    | 425                                                                  |        | 28  | 2    | 108  |   |
|    | GO:                                                                  |        | 67/ | 0.00 | 0.00 |   |
| BP | 1901 fatty acid derivative biosynthetic process                      | 5/292  | 233 | 152  | 187  | 5 |
|    | 570                                                                  |        | 28  | 2    | 108  |   |
|    | GO:                                                                  |        | 395 | 0.00 | 0.00 |   |
| BP | 0042 regulation of protein catabolic process                         | 13/292 | /23 | 152  | 187  | 1 |
|    | 176                                                                  |        | 328 | 474  | 32   | 3 |
|    | GO:                                                                  |        | 40/ | 0.00 | 0.00 |   |
| BP | 0032 interleukin-4 production                                        | 4/292  | 233 | 154  | 188  | 4 |
|    | 633                                                                  |        | 28  | 145  | 745  |   |
|    | GO:                                                                  |        | 40/ | 0.00 | 0.00 |   |
| BP | 0038 neurotrophin signaling pathway                                  | 4/292  | 233 | 154  | 188  | 4 |
|    | 179                                                                  |        | 28  | 145  | 745  |   |
|    | GO:                                                                  |        | 40/ | 0.00 | 0.00 |   |
| BP | 0060 type I interferon signaling pathway                             | 4/292  | 233 | 154  | 188  | 4 |
|    | 337                                                                  |        | 28  | 145  | 745  |   |



|    |                                                              |       |     |      |      |   |
|----|--------------------------------------------------------------|-------|-----|------|------|---|
|    | GO:                                                          |       | 40/ | 0.00 | 0.00 |   |
| BP | 0071 cellular response to type I interferon                  | 4/292 | 233 | 154  | 188  | 4 |
|    | 357                                                          |       | 28  | 145  | 745  |   |
|    | GO:                                                          |       | 40/ | 0.00 | 0.00 |   |
| BP | 1902 regulation of neuroblast proliferation                  | 4/292 | 233 | 154  | 188  | 4 |
|    | 692                                                          |       | 28  | 145  | 745  |   |
|    | GO:                                                          |       | 174 | 0.00 | 0.00 |   |
| BP | 1901 response to ketone                                      | 8/292 | 723 | 161  | 196  | 8 |
|    | 654                                                          |       | 328 | 905  | 555  |   |
|    | GO:                                                          |       | 19/ | 0.00 | 0.00 |   |
| BP | 0002 hypersensitivity                                        | 3/292 | 233 | 162  | 196  | 3 |
|    | 524                                                          |       | 28  | 121  | 555  |   |
|    | GO:                                                          |       | 19/ | 0.00 | 0.00 |   |
| BP | 0032 gonadotropin secretion                                  | 3/292 | 233 | 162  | 196  | 3 |
|    | 274                                                          |       | 28  | 121  | 555  |   |
|    | GO:                                                          |       | 19/ | 0.00 | 0.00 |   |
| BP | 0032 interleukin-5 production                                | 3/292 | 233 | 162  | 196  | 3 |
|    | 634                                                          |       | 28  | 121  | 555  |   |
|    | GO:                                                          |       | 19/ | 0.00 | 0.00 |   |
| BP | 0035 corticosteroid hormone secretion                        | 3/292 | 233 | 162  | 196  | 3 |
|    | 930                                                          |       | 28  | 121  | 555  |   |
|    | GO:                                                          |       | 19/ | 0.00 | 0.00 |   |
| BP | 0035 response to muscle stretch                              | 3/292 | 233 | 162  | 196  | 3 |
|    | 994                                                          |       | 28  | 121  | 555  |   |
|    | GO:                                                          |       | 19/ | 0.00 | 0.00 |   |
| BP | 0043 CD4-positive, alpha-beta T cell lineage commitment      | 3/292 | 233 | 162  | 196  | 3 |
|    | 373                                                          |       | 28  | 121  | 555  |   |
|    | GO:                                                          |       | 19/ | 0.00 | 0.00 |   |
| BP | 0045 negative regulation of gluconeogenesis                  | 3/292 | 233 | 162  | 196  | 3 |
|    | 721                                                          |       | 28  | 121  | 555  |   |
|    | GO:                                                          |       | 19/ | 0.00 | 0.00 |   |
| BP | 0051 keratinocyte migration                                  | 3/292 | 233 | 162  | 196  | 3 |
|    | 546                                                          |       | 28  | 121  | 555  |   |
|    | GO:                                                          |       | 19/ | 0.00 | 0.00 |   |
| BP | 0060 spongiotrophoblast layer development                    | 3/292 | 233 | 162  | 196  | 3 |
|    | 712                                                          |       | 28  | 121  | 555  |   |
|    | GO:                                                          |       | 19/ | 0.00 | 0.00 |   |
| BP | 0071 monocyte chemotactic protein-1 production               | 3/292 | 233 | 162  | 196  | 3 |
|    | 605                                                          |       | 28  | 121  | 555  |   |
|    | GO:                                                          |       | 19/ | 0.00 | 0.00 |   |
| BP | 0071 regulation of monocyte chemotactic protein-1 production | 3/292 | 233 | 162  | 196  | 3 |
|    | 637                                                          |       | 28  | 121  | 555  |   |

|    |      |                                                                         |        |      |      |     |   |
|----|------|-------------------------------------------------------------------------|--------|------|------|-----|---|
|    | GO:  |                                                                         | 19/    | 0.00 | 0.00 |     |   |
| BP | 1900 | positive regulation of glutamate receptor signaling pathway             | 3/292  | 233  | 162  | 196 | 3 |
|    | 451  |                                                                         |        | 28   | 121  | 555 |   |
|    | GO:  |                                                                         | 19/    | 0.00 | 0.00 |     |   |
| BP | 1904 | positive regulation of vascular associated smooth muscle cell migration | 3/292  | 233  | 162  | 196 | 3 |
|    | 754  |                                                                         |        | 28   | 121  | 555 |   |
|    | GO:  |                                                                         | 19/    | 0.00 | 0.00 |     |   |
| BP | 2000 | positive regulation of actin cytoskeleton reorganization                | 3/292  | 233  | 162  | 196 | 3 |
|    | 251  |                                                                         |        | 28   | 121  | 555 |   |
|    | GO:  |                                                                         | 68/    | 0.00 | 0.00 |     |   |
| BP | 0022 | telencephalon cell migration                                            | 5/292  | 233  | 162  | 197 | 5 |
|    | 029  |                                                                         |        | 28   | 624  | 035 |   |
|    | GO:  |                                                                         | 136    | 0.00 | 0.00 |     |   |
| BP | 0055 | digestive system development                                            | 7/292  | /23  | 165  | 200 | 7 |
|    | 123  |                                                                         |        | 328  | 629  | 544 |   |
|    | GO:  |                                                                         | 41/    | 0.00 | 0.00 |     |   |
| BP | 0010 | protein kinase A signaling                                              | 4/292  | 233  | 169  | 204 | 4 |
|    | 737  |                                                                         |        | 28   | 146  | 266 |   |
|    | GO:  |                                                                         | 41/    | 0.00 | 0.00 |     |   |
| BP | 0048 | epidermis morphogenesis                                                 | 4/292  | 233  | 169  | 204 | 4 |
|    | 730  |                                                                         |        | 28   | 146  | 266 |   |
|    | GO:  |                                                                         | 41/    | 0.00 | 0.00 |     |   |
| BP | 1900 | regulation of p38MAPK cascade                                           | 4/292  | 233  | 169  | 204 | 4 |
|    | 744  |                                                                         |        | 28   | 146  | 266 |   |
|    | GO:  |                                                                         | 41/    | 0.00 | 0.00 |     |   |
| BP | 1905 | positive regulation of morphogenesis of an epithelium                   | 4/292  | 233  | 169  | 204 | 4 |
|    | 332  |                                                                         |        | 28   | 146  | 266 |   |
|    | GO:  |                                                                         | 260    | 0.00 | 0.00 |     |   |
| BP | 0042 | response to drug                                                        | 10/292 | /23  | 170  | 205 | 1 |
|    | 493  |                                                                         |        | 328  | 639  | 934 | 0 |
|    | GO:  |                                                                         | 101    | 0.00 | 0.00 |     |   |
| BP | 0032 | positive regulation of protein binding                                  | 6/292  | /23  | 171  | 206 | 6 |
|    | 092  |                                                                         |        | 328  | 353  | 661 |   |
|    | GO:  |                                                                         | 69/    | 0.00 | 0.00 |     |   |
| BP | 0021 | diencephalon development                                                | 5/292  | 233  | 173  | 209 | 5 |
|    | 536  |                                                                         |        | 28   | 563  | 19  |   |
|    | GO:  |                                                                         | 70/    | 0.00 | 0.00 |     |   |
| BP | 0001 | ovarian follicle development                                            | 5/292  | 233  | 185  | 222 | 5 |
|    | 541  |                                                                         |        | 28   | 032  | 117 |   |
|    | GO:  |                                                                         | 70/    | 0.00 | 0.00 |     |   |
| BP | 0006 | vitamin metabolic process                                               | 5/292  | 233  | 185  | 222 | 5 |
|    | 766  |                                                                         |        | 28   | 032  | 117 |   |

|    |      |                                                     |       |      |      |     |   |
|----|------|-----------------------------------------------------|-------|------|------|-----|---|
|    | GO:  |                                                     | 70/   | 0.00 | 0.00 |     |   |
| BP | 0045 | positive regulation of osteoblast differentiation   | 5/292 | 233  | 185  | 222 | 5 |
|    | 669  |                                                     |       | 28   | 032  | 117 |   |
|    | GO:  |                                                     | 70/   | 0.00 | 0.00 |     |   |
| BP | 0055 | cardiac muscle tissue morphogenesis                 | 5/292 | 233  | 185  | 222 | 5 |
|    | 008  |                                                     |       | 28   | 032  | 117 |   |
|    | GO:  |                                                     | 42/   | 0.00 | 0.00 |     |   |
| BP | 0006 | membrane protein ectodomain proteolysis             | 4/292 | 233  | 185  | 222 | 4 |
|    | 509  |                                                     |       | 28   | 131  | 117 |   |
|    | GO:  |                                                     | 42/   | 0.00 | 0.00 |     |   |
| BP | 0030 | positive regulation of bone mineralization          | 4/292 | 233  | 185  | 222 | 4 |
|    | 501  |                                                     |       | 28   | 131  | 117 |   |
|    | GO:  |                                                     | 42/   | 0.00 | 0.00 |     |   |
| BP | 0055 | positive regulation of cardiac muscle tissue growth | 4/292 | 233  | 185  | 222 | 4 |
|    | 023  |                                                     |       | 28   | 131  | 117 |   |
|    | GO:  |                                                     | 178   | 0.00 | 0.00 |     |   |
| BP | 0071 | response to BMP                                     | 8/292 | /23  | 186  | 223 | 8 |
|    | 772  |                                                     |       | 328  | 779  | 802 |   |
|    | GO:  |                                                     | 178   | 0.00 | 0.00 |     |   |
| BP | 0071 | cellular response to BMP stimulus                   | 8/292 | /23  | 186  | 223 | 8 |
|    | 773  |                                                     |       | 328  | 779  | 802 |   |
|    | GO:  |                                                     | 139   | 0.00 | 0.00 |     |   |
| BP | 0008 | male gonad development                              | 7/292 | /23  | 187  | 224 | 7 |
|    | 584  |                                                     |       | 328  | 605  | 647 |   |
|    | GO:  |                                                     | 20/   | 0.00 | 0.00 |     |   |
| BP | 0010 | positive regulation of fibroblast migration         | 3/292 | 233  | 188  | 225 | 3 |
|    | 763  |                                                     |       | 28   | 975  | 119 |   |
|    | GO:  |                                                     | 20/   | 0.00 | 0.00 |     |   |
| BP | 0010 | positive regulation of cholesterol efflux           | 3/292 | 233  | 188  | 225 | 3 |
|    | 875  |                                                     |       | 28   | 975  | 119 |   |
|    | GO:  |                                                     | 20/   | 0.00 | 0.00 |     |   |
| BP | 0010 | negative regulation of lipid storage                | 3/292 | 233  | 188  | 225 | 3 |
|    | 888  |                                                     |       | 28   | 975  | 119 |   |
|    | GO:  |                                                     | 20/   | 0.00 | 0.00 |     |   |
| BP | 0021 | cell proliferation in hindbrain                     | 3/292 | 233  | 188  | 225 | 3 |
|    | 534  |                                                     |       | 28   | 975  | 119 |   |
|    | GO:  |                                                     | 20/   | 0.00 | 0.00 |     |   |
| BP | 0043 | myeloid dendritic cell differentiation              | 3/292 | 233  | 188  | 225 | 3 |
|    | 011  |                                                     |       | 28   | 975  | 119 |   |
|    | GO:  |                                                     | 20/   | 0.00 | 0.00 |     |   |
| BP | 0045 | negative regulation of smooth muscle contraction    | 3/292 | 233  | 188  | 225 | 3 |
|    | 986  |                                                     |       | 28   | 975  | 119 |   |

|    |                                                 |       |     |      |      |   |
|----|-------------------------------------------------|-------|-----|------|------|---|
|    | GO:                                             |       | 20/ | 0.00 | 0.00 |   |
| BP | 0046 negative regulation of bone remodeling     | 3/292 | 233 | 188  | 225  | 3 |
|    | 851                                             |       | 28  | 975  | 119  |   |
|    | GO:                                             |       | 20/ | 0.00 | 0.00 |   |
| BP | 0050 detection of temperature stimulus involved | 3/292 | 233 | 188  | 225  | 3 |
|    | 965 in sensory perception of pain               |       | 28  | 975  | 119  |   |
|    | GO:                                             |       | 221 | 0.00 | 0.00 |   |
| BP | 0019 viral life cycle                           | 9/292 | /23 | 195  | 232  | 9 |
|    | 058                                             |       | 328 | 243  | 435  |   |
|    | GO:                                             |       | 140 | 0.00 | 0.00 |   |
| BP | 0046 development of primary male sexual         | 7/292 | /23 | 195  | 232  | 7 |
|    | 546 characteristics                             |       | 328 | 412  | 486  |   |
|    | GO:                                             |       | 71/ | 0.00 | 0.00 |   |
| BP | 0007 endoderm development                       | 5/292 | 233 | 197  | 233  | 5 |
|    | 492                                             |       | 28  | 046  | 978  |   |
|    | GO:                                             |       | 71/ | 0.00 | 0.00 |   |
| BP | 0021 forebrain cell migration                   | 5/292 | 233 | 197  | 233  | 5 |
|    | 885                                             |       | 28  | 046  | 978  |   |
|    | GO:                                             |       | 71/ | 0.00 | 0.00 |   |
| BP | 0060 ureteric bud morphogenesis                 | 5/292 | 233 | 197  | 233  | 5 |
|    | 675                                             |       | 28  | 046  | 978  |   |
|    | GO:                                             |       | 222 | 0.00 | 0.00 |   |
| BP | 0030 regulation of endocytosis                  | 9/292 | /23 | 201  | 238  | 9 |
|    | 100                                             |       | 328 | 316  | 741  |   |
|    | GO:                                             |       | 222 | 0.00 | 0.00 |   |
| BP | 0045 positive regulation of protein catabolic   | 9/292 | /23 | 201  | 238  | 9 |
|    | 732 process                                     |       | 328 | 316  | 741  |   |
|    | GO:                                             |       | 43/ | 0.00 | 0.00 |   |
| BP | 0046 positive regulation of glucose import      | 4/292 | 233 | 202  | 239  | 4 |
|    | 326                                             |       | 28  | 133  | 403  |   |
|    | GO:                                             |       | 43/ | 0.00 | 0.00 |   |
| BP | 1903 negative regulation of anion transport     | 4/292 | 233 | 202  | 239  | 4 |
|    | 792                                             |       | 28  | 133  | 403  |   |
|    | GO:                                             |       | 105 | 0.00 | 0.00 |   |
| BP | 0002 myeloid leukocyte mediated immunity        | 6/292 | /23 | 208  | 247  | 6 |
|    | 444                                             |       | 328 | 767  | 101  |   |
|    | GO:                                             |       | 72/ | 0.00 | 0.00 |   |
| BP | 0007 adenylate cyclase-inhibiting G protein-    | 5/292 | 233 | 209  | 247  | 5 |
|    | 193 coupled receptor signaling pathway          |       | 28  | 62   | 792  |   |
|    | GO:                                             |       | 72/ | 0.00 | 0.00 |   |
| BP | 0072 mesonephric tubule morphogenesis           | 5/292 | 233 | 209  | 247  | 5 |
|    | 171                                             |       | 28  | 62   | 792  |   |

|    |                                                                                 |       |     |      |      |   |
|----|---------------------------------------------------------------------------------|-------|-----|------|------|---|
|    | GO:                                                                             |       | 21/ | 0.00 | 0.00 |   |
| BP | 0002 alpha-beta T cell lineage commitment                                       | 3/292 | 233 | 218  | 255  | 3 |
|    | 363                                                                             |       | 28  | 444  | 603  |   |
|    | GO:                                                                             |       | 21/ | 0.00 | 0.00 |   |
| BP | 0003 pulmonary valve development                                                | 3/292 | 233 | 218  | 255  | 3 |
|    | 177                                                                             |       | 28  | 444  | 603  |   |
|    | GO:                                                                             |       | 21/ | 0.00 | 0.00 |   |
| BP | 0007 activation of adenylate cyclase activity                                   | 3/292 | 233 | 218  | 255  | 3 |
|    | 190                                                                             |       | 28  | 444  | 603  |   |
|    | GO:                                                                             |       | 21/ | 0.00 | 0.00 |   |
| BP | 0009 vitamin biosynthetic process                                               | 3/292 | 233 | 218  | 255  | 3 |
|    | 110                                                                             |       | 28  | 444  | 603  |   |
|    | GO:                                                                             |       | 21/ | 0.00 | 0.00 |   |
| BP | 0010 regulation of receptor biosynthetic process                                | 3/292 | 233 | 218  | 255  | 3 |
|    | 869                                                                             |       | 28  | 444  | 603  |   |
|    | GO:                                                                             |       | 21/ | 0.00 | 0.00 |   |
| BP | 0032 positive regulation of icosanoid secretion                                 | 3/292 | 233 | 218  | 255  | 3 |
|    | 305                                                                             |       | 28  | 444  | 603  |   |
|    | GO:                                                                             |       | 21/ | 0.00 | 0.00 |   |
| BP | 0033 positive regulation of cell adhesion mediated<br>by integrin               | 3/292 | 233 | 218  | 255  | 3 |
|    | 630                                                                             |       | 28  | 444  | 603  |   |
|    | GO:                                                                             |       | 21/ | 0.00 | 0.00 |   |
| BP | 0034 response to prostaglandin                                                  | 3/292 | 233 | 218  | 255  | 3 |
|    | 694                                                                             |       | 28  | 444  | 603  |   |
|    | GO:                                                                             |       | 21/ | 0.00 | 0.00 |   |
| BP | 0045 T-helper 1 cell differentiation                                            | 3/292 | 233 | 218  | 255  | 3 |
|    | 063                                                                             |       | 28  | 444  | 603  |   |
|    | GO:                                                                             |       | 21/ | 0.00 | 0.00 |   |
| BP | 0046 negative regulation of glucose import                                      | 3/292 | 233 | 218  | 255  | 3 |
|    | 325                                                                             |       | 28  | 444  | 603  |   |
|    | GO:                                                                             |       | 21/ | 0.00 | 0.00 |   |
| BP | 0046 decidualization                                                            | 3/292 | 233 | 218  | 255  | 3 |
|    | 697                                                                             |       | 28  | 444  | 603  |   |
|    | GO:                                                                             |       | 21/ | 0.00 | 0.00 |   |
| BP | 0048 parasympathetic nervous system<br>development                              | 3/292 | 233 | 218  | 255  | 3 |
|    | 486                                                                             |       | 28  | 444  | 603  |   |
|    | GO:                                                                             |       | 21/ | 0.00 | 0.00 |   |
| BP | 0050 detection of mechanical stimulus involved in<br>sensory perception of pain | 3/292 | 233 | 218  | 255  | 3 |
|    | 966                                                                             |       | 28  | 444  | 603  |   |
|    | GO:                                                                             |       | 21/ | 0.00 | 0.00 |   |
| BP | 0060 angiogenesis involved in wound healing                                     | 3/292 | 233 | 218  | 255  | 3 |
|    | 055                                                                             |       | 28  | 444  | 603  |   |

|    |      |                                                |       |     |      |      |   |
|----|------|------------------------------------------------|-------|-----|------|------|---|
|    | GO:  |                                                |       | 21/ | 0.00 | 0.00 |   |
| BP | 0060 | positive regulation of digestive system        | 3/292 | 233 | 218  | 255  | 3 |
|    | 456  | process                                        |       | 28  | 444  | 603  |   |
|    | GO:  |                                                |       | 21/ | 0.00 | 0.00 |   |
| BP | 0090 | positive regulation of cell migration involved | 3/292 | 233 | 218  | 255  | 3 |
|    | 050  | in sprouting angiogenesis                      |       | 28  | 444  | 603  |   |
|    | GO:  |                                                |       | 44/ | 0.00 | 0.00 |   |
| BP | 0010 | regulation of glycoprotein biosynthetic        | 4/292 | 233 | 220  | 256  | 4 |
|    | 559  | process                                        |       | 28  | 184  | 826  |   |
|    | GO:  |                                                |       | 44/ | 0.00 | 0.00 |   |
| BP | 0033 | regulation of cell adhesion mediated by        | 4/292 | 233 | 220  | 256  | 4 |
|    | 628  | integrin                                       |       | 28  | 184  | 826  |   |
|    | GO:  |                                                |       | 44/ | 0.00 | 0.00 |   |
| BP | 0045 | positive regulation of Notch signaling         | 4/292 | 233 | 220  | 256  | 4 |
|    | 747  | pathway                                        |       | 28  | 184  | 826  |   |
|    | GO:  |                                                |       | 44/ | 0.00 | 0.00 |   |
| BP | 0071 | cellular response to glucocorticoid stimulus   | 4/292 | 233 | 220  | 256  | 4 |
|    | 385  |                                                |       | 28  | 184  | 826  |   |
|    | GO:  |                                                |       | 44/ | 0.00 | 0.00 |   |
| BP | 1903 | positive regulation of sprouting angiogenesis  | 4/292 | 233 | 220  | 256  | 4 |
|    | 672  |                                                |       | 28  | 184  | 826  |   |
|    | GO:  |                                                |       | 73/ | 0.00 | 0.00 |   |
| BP | 0002 | regulation of myeloid leukocyte mediated       | 5/292 | 233 | 222  | 259  | 5 |
|    | 886  | immunity                                       |       | 28  | 769  | 676  |   |
|    | GO:  |                                                |       | 144 | 0.00 | 0.00 |   |
| BP | 0090 | positive regulation of intracellular protein   | 7/292 | /23 | 229  | 266  | 7 |
|    | 316  | transport                                      |       | 328 | 184  | 986  |   |
|    | GO:  |                                                |       | 107 | 0.00 | 0.00 |   |
| BP | 0110 | regulation of actomyosin structure             | 6/292 | /23 | 229  | 267  | 6 |
|    | 020  | organization                                   |       | 328 | 638  | 345  |   |
|    | GO:  |                                                |       | 185 | 0.00 | 0.00 |   |
| BP | 0009 | response to glucose                            | 8/292 | /23 | 237  | 276  | 8 |
|    | 749  |                                                |       | 328 | 478  | 299  |   |
|    | GO:  |                                                |       | 45/ | 0.00 | 0.00 |   |
| BP | 0010 | regulation of mesenchymal cell proliferation   | 4/292 | 233 | 239  | 277  | 4 |
|    | 464  |                                                |       | 28  | 317  | 912  |   |
|    | GO:  |                                                |       | 45/ | 0.00 | 0.00 |   |
| BP | 0060 | positive regulation of heart growth            | 4/292 | 233 | 239  | 277  | 4 |
|    | 421  |                                                |       | 28  | 317  | 912  |   |
|    | GO:  |                                                |       | 45/ | 0.00 | 0.00 |   |
| BP | 1901 | regulation of response to reactive oxygen      | 4/292 | 233 | 239  | 277  | 4 |
|    | 031  | species                                        |       | 28  | 317  | 912  |   |

|    |                                                                  |        |     |      |      |   |
|----|------------------------------------------------------------------|--------|-----|------|------|---|
|    | GO:                                                              |        | 108 | 0.00 | 0.00 |   |
| BP | 0060 artery development                                          | 6/292  | /23 | 240  | 279  | 6 |
|    | 840                                                              |        | 328 | 644  | 278  |   |
|    | GO:                                                              |        | 273 | 0.00 | 0.00 | 1 |
| BP | 0110 regulation of actin filament organization                   | 10/292 | /23 | 243  | 282  | 0 |
|    | 053                                                              |        | 328 | 484  | 396  |   |
|    | GO:                                                              |        | 22/ | 0.00 | 0.00 |   |
| BP | 0032 interleukin-13 production                                   | 3/292  | 233 | 250  | 289  | 3 |
|    | 616                                                              |        | 28  | 61   | 206  |   |
|    | GO:                                                              |        | 22/ | 0.00 | 0.00 |   |
| BP | 0045 negative regulation of epidermis development                | 3/292  | 233 | 250  | 289  | 3 |
|    | 683                                                              |        | 28  | 61   | 206  |   |
|    | GO:                                                              |        | 22/ | 0.00 | 0.00 |   |
| BP | 0048 anatomical structure arrangement                            | 3/292  | 233 | 250  | 289  | 3 |
|    | 532                                                              |        | 28  | 61   | 206  |   |
|    | GO:                                                              |        | 22/ | 0.00 | 0.00 |   |
| BP | 0051 killing by host of symbiont cells                           | 3/292  | 233 | 250  | 289  | 3 |
|    | 873                                                              |        | 28  | 61   | 206  |   |
|    | GO:                                                              |        | 22/ | 0.00 | 0.00 |   |
| BP | 0072 regulation of metanephros development                       | 3/292  | 233 | 250  | 289  | 3 |
|    | 215                                                              |        | 28  | 61   | 206  |   |
|    | GO:                                                              |        | 22/ | 0.00 | 0.00 |   |
| BP | 1903 positive regulation of extracellular matrix organization    | 3/292  | 233 | 250  | 289  | 3 |
|    | 055                                                              |        | 28  | 61   | 206  |   |
|    | GO:                                                              |        | 22/ | 0.00 | 0.00 |   |
| BP | 2000 positive regulation of protein localization to cell surface | 3/292  | 233 | 250  | 289  | 3 |
|    | 010                                                              |        | 28  | 61   | 206  |   |
|    | GO:                                                              |        | 22/ | 0.00 | 0.00 |   |
| BP | 2001 regulation of endothelial cell chemotaxis                   | 3/292  | 233 | 250  | 289  | 3 |
|    | 026                                                              |        | 28  | 61   | 206  |   |
|    | GO:                                                              |        | 75/ | 0.00 | 0.00 |   |
| BP | 0046 regulation of insulin receptor signaling pathway            | 5/292  | 233 | 250  | 289  | 5 |
|    | 626                                                              |        | 28  | 854  | 308  |   |
|    | GO:                                                              |        | 46/ | 0.00 | 0.00 |   |
| BP | 0031 regulation of protein autophosphorylation                   | 4/292  | 233 | 259  | 298  | 4 |
|    | 952                                                              |        | 28  | 562  | 79   |   |
|    | GO:                                                              |        | 46/ | 0.00 | 0.00 |   |
| BP | 0043 keratinocyte proliferation                                  | 4/292  | 233 | 259  | 298  | 4 |
|    | 616                                                              |        | 28  | 562  | 79   |   |
|    | GO:                                                              |        | 46/ | 0.00 | 0.00 |   |
| BP | 0071 cellular response to corticosteroid stimulus                | 4/292  | 233 | 259  | 298  | 4 |
|    | 384                                                              |        | 28  | 562  | 79   |   |

|    |                                                    |        |     |      |      |   |
|----|----------------------------------------------------|--------|-----|------|------|---|
|    | GO:                                                |        | 188 | 0.00 | 0.00 |   |
| BP | 0009 response to hexose                            | 8/292  | /23 | 262  | 301  | 8 |
|    | 746                                                |        | 328 | 256  | 515  |   |
|    | GO:                                                |        | 188 | 0.00 | 0.00 |   |
| BP | 0010 positive regulation of cell morphogenesis     | 8/292  | /23 | 262  | 301  | 8 |
|    | 770 involved in differentiation                    |        | 328 | 256  | 515  |   |
|    | GO:                                                |        | 110 | 0.00 | 0.00 |   |
| BP | 0032 regulation of actin filament bundle assembly  | 6/292  | /23 | 263  | 303  | 6 |
|    | 231                                                |        | 328 | 842  | 15   |   |
|    | GO:                                                |        | 232 | 0.00 | 0.00 |   |
| BP | 0033 regulation of intracellular protein transport | 9/292  | /23 | 270  | 310  | 9 |
|    | 157                                                |        | 328 | 729  | 869  |   |
|    | GO:                                                |        | 189 | 0.00 | 0.00 |   |
| BP | 0034 response to monosaccharide                    | 8/292  | /23 | 270  | 310  | 8 |
|    | 284                                                |        | 328 | 95   | 896  |   |
|    | GO:                                                |        | 422 | 0.00 | 0.00 |   |
| BP | 0060 anatomical structure homeostasis              | 13/292 | /23 | 271  | 310  | 1 |
|    | 249                                                |        | 328 | 09   | 896  | 3 |
|    | GO:                                                |        | 47/ | 0.00 | 0.00 |   |
| BP | 0043 T cell homeostasis                            | 4/292  | 233 | 280  | 321  | 4 |
|    | 029                                                |        | 28  | 952  | 807  |   |
|    | GO:                                                |        | 47/ | 0.00 | 0.00 |   |
| BP | 0060 regulation of gene silencing by miRNA         | 4/292  | 233 | 280  | 321  | 4 |
|    | 964                                                |        | 28  | 952  | 807  |   |
|    | GO:                                                |        | 23/ | 0.00 | 0.00 |   |
| BP | 0002 mature B cell differentiation involved in     | 3/292  | 233 | 285  | 324  | 3 |
|    | 313 immune response                                |        | 28  | 554  | 459  |   |
|    | GO:                                                |        | 23/ | 0.00 | 0.00 |   |
| BP | 0003 aortic valve development                      | 3/292  | 233 | 285  | 324  | 3 |
|    | 176                                                |        | 28  | 554  | 459  |   |
|    | GO:                                                |        | 23/ | 0.00 | 0.00 |   |
| BP | 0003 atrial septum development                     | 3/292  | 233 | 285  | 324  | 3 |
|    | 283                                                |        | 28  | 554  | 459  |   |
|    | GO:                                                |        | 23/ | 0.00 | 0.00 |   |
| BP | 0010 positive regulation of glycoprotein           | 3/292  | 233 | 285  | 324  | 3 |
|    | 560 biosynthetic process                           |        | 28  | 554  | 459  |   |
|    | GO:                                                |        | 23/ | 0.00 | 0.00 |   |
| BP | 0043 CD4-positive or CD8-positive, alpha-beta T    | 3/292  | 233 | 285  | 324  | 3 |
|    | 369 cell lineage commitment                        |        | 28  | 554  | 459  |   |
|    | GO:                                                |        | 23/ | 0.00 | 0.00 |   |
| BP | 0048 sympathetic nervous system development        | 3/292  | 233 | 285  | 324  | 3 |
|    | 485                                                |        | 28  | 554  | 459  |   |



|    |      |                                                                         |        |      |      |     |   |
|----|------|-------------------------------------------------------------------------|--------|------|------|-----|---|
|    | GO:  |                                                                         | 23/    | 0.00 | 0.00 |     |   |
| BP | 0050 | positive regulation of antigen receptor-mediated signaling pathway      | 3/292  | 233  | 285  | 324 | 3 |
|    | 857  |                                                                         |        | 28   | 554  | 459 |   |
|    | GO:  |                                                                         | 23/    | 0.00 | 0.00 |     |   |
| BP | 0050 | detection of temperature stimulus involved in sensory perception        | 3/292  | 233  | 285  | 324 | 3 |
|    | 961  |                                                                         |        | 28   | 554  | 459 |   |
|    | GO:  |                                                                         | 23/    | 0.00 | 0.00 |     |   |
| BP | 0071 | cellular response to dsRNA                                              | 3/292  | 233  | 285  | 324 | 3 |
|    | 359  |                                                                         |        | 28   | 554  | 459 |   |
|    | GO:  |                                                                         | 23/    | 0.00 | 0.00 |     |   |
| BP | 0072 | cell differentiation involved in metanephros development                | 3/292  | 233  | 285  | 324 | 3 |
|    | 202  |                                                                         |        | 28   | 554  | 459 |   |
|    | GO:  |                                                                         | 23/    | 0.00 | 0.00 |     |   |
| BP | 0090 | positive regulation of branching involved in ureteric bud morphogenesis | 3/292  | 233  | 285  | 324 | 3 |
|    | 190  |                                                                         |        | 28   | 554  | 459 |   |
|    | GO:  |                                                                         | 23/    | 0.00 | 0.00 |     |   |
| BP | 0101 | vascular endothelial cell proliferation                                 | 3/292  | 233  | 285  | 324 | 3 |
|    | 023  |                                                                         |        | 28   | 554  | 459 |   |
|    | GO:  |                                                                         | 23/    | 0.00 | 0.00 |     |   |
| BP | 1905 | regulation of vascular endothelial cell proliferation                   | 3/292  | 233  | 285  | 324 | 3 |
|    | 562  |                                                                         |        | 28   | 554  | 459 |   |
|    | GO:  |                                                                         | 426    | 0.00 | 0.00 |     |   |
| BP | 0072 | establishment of protein localization to organelle                      | 13/292 | /23  | 293  | 333 | 1 |
|    | 594  |                                                                         |        | 328  | 803  | 627 | 3 |
|    | GO:  |                                                                         | 78/    | 0.00 | 0.00 |     |   |
| BP | 0014 | striated muscle cell proliferation                                      | 5/292  | 233  | 297  | 337 | 5 |
|    | 855  |                                                                         |        | 28   | 68   | 822 |   |
|    | GO:  |                                                                         | 151    | 0.00 | 0.00 |     |   |
| BP | 0072 | nephron development                                                     | 7/292  | /23  | 298  | 339 | 7 |
|    | 006  |                                                                         |        | 328  | 927  | 029 |   |
|    | GO:  |                                                                         | 48/    | 0.00 | 0.00 |     |   |
| BP | 0010 | regulation of lipid storage                                             | 4/292  | 233  | 303  | 343 | 4 |
|    | 883  |                                                                         |        | 28   | 518  | 812 |   |
|    | GO:  |                                                                         | 48/    | 0.00 | 0.00 |     |   |
| BP | 0038 | p38MAPK cascade                                                         | 4/292  | 233  | 303  | 343 | 4 |
|    | 066  |                                                                         |        | 28   | 518  | 812 |   |
|    | GO:  |                                                                         | 479    | 0.00 | 0.00 |     |   |
| BP | 0050 | synapse organization                                                    | 14/292 | /23  | 303  | 343 | 1 |
|    | 808  |                                                                         |        | 328  | 813  | 935 | 4 |
|    | GO:  |                                                                         | 379    | 0.00 | 0.00 |     |   |
| BP | 0051 | regulation of DNA metabolic process                                     | 12/292 | /23  | 313  | 354 | 1 |
|    | 052  |                                                                         |        | 328  | 181  | 324 | 2 |

|    |                                                                               |       |     |      |      |   |
|----|-------------------------------------------------------------------------------|-------|-----|------|------|---|
|    | GO:                                                                           |       | 79/ | 0.00 | 0.00 |   |
| BP | 0055 regulation of cardiac muscle tissue growth                               | 5/292 | 233 | 314  | 355  | 5 |
|    | 021                                                                           |       | 28  | 602  | 713  |   |
|    | GO:                                                                           |       | 114 | 0.00 | 0.00 |   |
| BP | 0001 embryonic placenta development                                           | 6/292 | /23 | 315  | 356  | 6 |
|    | 892                                                                           |       | 328 | 224  | 198  |   |
|    | GO:                                                                           |       | 194 | 0.00 | 0.00 |   |
| BP | 0021 neural tube development                                                  | 8/292 | /23 | 317  | 358  | 8 |
|    | 915                                                                           |       | 328 | 85   | 946  |   |
|    | GO:                                                                           |       | 24/ | 0.00 | 0.00 |   |
| BP | 0002 leukocyte migration involved in inflammatory response                    | 3/292 | 233 | 323  | 363  | 3 |
|    | 523                                                                           |       | 28  | 351  | 379  |   |
|    | GO:                                                                           |       | 24/ | 0.00 | 0.00 |   |
| BP | 0002 regulation of acute inflammatory response to antigenic stimulus          | 3/292 | 233 | 323  | 363  | 3 |
|    | 864                                                                           |       | 28  | 351  | 379  |   |
|    | GO:                                                                           |       | 24/ | 0.00 | 0.00 |   |
| BP | 0003 atrioventricular valve morphogenesis                                     | 3/292 | 233 | 323  | 363  | 3 |
|    | 181                                                                           |       | 28  | 351  | 379  |   |
|    | GO:                                                                           |       | 24/ | 0.00 | 0.00 |   |
| BP | 0003 endocardial cushion formation                                            | 3/292 | 233 | 323  | 363  | 3 |
|    | 272                                                                           |       | 28  | 351  | 379  |   |
|    | GO:                                                                           |       | 24/ | 0.00 | 0.00 |   |
| BP | 0007 protein kinase C-activating G protein-coupled receptor signaling pathway | 3/292 | 233 | 323  | 363  | 3 |
|    | 205                                                                           |       | 28  | 351  | 379  |   |
|    | GO:                                                                           |       | 24/ | 0.00 | 0.00 |   |
| BP | 0048 regulation of collateral sprouting                                       | 3/292 | 233 | 323  | 363  | 3 |
|    | 670                                                                           |       | 28  | 351  | 379  |   |
|    | GO:                                                                           |       | 24/ | 0.00 | 0.00 |   |
| BP | 0050 negative regulation of defense response to virus                         | 3/292 | 233 | 323  | 363  | 3 |
|    | 687                                                                           |       | 28  | 351  | 379  |   |
|    | GO:                                                                           |       | 24/ | 0.00 | 0.00 |   |
| BP | 0072 metanephric epithelium development                                       | 3/292 | 233 | 323  | 363  | 3 |
|    | 207                                                                           |       | 28  | 351  | 379  |   |
|    | GO:                                                                           |       | 49/ | 0.00 | 0.00 |   |
| BP | 0035 production of miRNAs involved in gene silencing by miRNA                 | 4/292 | 233 | 327  | 366  | 4 |
|    | 196                                                                           |       | 28  | 29   | 688  |   |
|    | GO:                                                                           |       | 49/ | 0.00 | 0.00 |   |
| BP | 0042 eating behavior                                                          | 4/292 | 233 | 327  | 366  | 4 |
|    | 755                                                                           |       | 28  | 29   | 688  |   |
|    | GO:                                                                           |       | 49/ | 0.00 | 0.00 |   |
| BP | 0061 establishment of endothelial barrier                                     | 4/292 | 233 | 327  | 366  | 4 |
|    | 028                                                                           |       | 28  | 29   | 688  |   |

|    |      |                                                                                |       |      |      |     |   |
|----|------|--------------------------------------------------------------------------------|-------|------|------|-----|---|
|    | GO:  |                                                                                | 49/   | 0.00 | 0.00 |     |   |
| BP | 1902 | regulation of extrinsic apoptotic signaling pathway via death domain receptors | 4/292 | 233  | 327  | 366 | 4 |
|    | 041  |                                                                                |       | 28   | 29   | 688 |   |
|    | GO:  |                                                                                | 49/   | 0.00 | 0.00 |     |   |
| BP | 1905 | negative regulation of lipid localization                                      | 4/292 | 233  | 327  | 366 | 4 |
|    | 953  |                                                                                |       | 28   | 29   | 688 |   |
|    | GO:  |                                                                                | 80/   | 0.00 | 0.00 |     |   |
| BP | 0072 | nephron tubule morphogenesis                                                   | 5/292 | 233  | 332  | 371 | 5 |
|    | 078  |                                                                                |       | 28   | 207  | 972 |   |
|    | GO:  |                                                                                | 116   | 0.00 | 0.00 |     |   |
| BP | 0042 | inner ear morphogenesis                                                        | 6/292 | 723  | 343  | 384 | 6 |
|    | 472  |                                                                                |       | 328  | 549  | 438 |   |
|    | GO:  |                                                                                | 50/   | 0.00 | 0.00 |     |   |
| BP | 0032 | negative regulation of interleukin-6 production                                | 4/292 | 233  | 352  | 393 | 4 |
|    | 715  |                                                                                |       | 28   | 299  | 038 |   |
|    | GO:  |                                                                                | 50/   | 0.00 | 0.00 |     |   |
| BP | 0060 | regulation of posttranscriptional gene silencing                               | 4/292 | 233  | 352  | 393 | 4 |
|    | 147  |                                                                                |       | 28   | 299  | 038 |   |
|    | GO:  |                                                                                | 50/   | 0.00 | 0.00 |     |   |
| BP | 0060 | regulation of gene silencing by RNA                                            | 4/292 | 233  | 352  | 393 | 4 |
|    | 966  |                                                                                |       | 28   | 299  | 038 |   |
|    | GO:  |                                                                                | 50/   | 0.00 | 0.00 |     |   |
| BP | 0070 | positive regulation of biomineral tissue development                           | 4/292 | 233  | 352  | 393 | 4 |
|    | 169  |                                                                                |       | 28   | 299  | 038 |   |
|    | GO:  |                                                                                | 50/   | 0.00 | 0.00 |     |   |
| BP | 0110 | positive regulation of biomineralization                                       | 4/292 | 233  | 352  | 393 | 4 |
|    | 151  |                                                                                |       | 28   | 299  | 038 |   |
|    | GO:  |                                                                                | 25/   | 0.00 | 0.00 |     |   |
| BP | 0032 | negative regulation of interleukin-2 production                                | 3/292 | 233  | 364  | 403 | 3 |
|    | 703  |                                                                                |       | 28   | 073  | 49  |   |
|    | GO:  |                                                                                | 25/   | 0.00 | 0.00 |     |   |
| BP | 0032 | positive regulation of interleukin-4 production                                | 3/292 | 233  | 364  | 403 | 3 |
|    | 753  |                                                                                |       | 28   | 073  | 49  |   |
|    | GO:  |                                                                                | 25/   | 0.00 | 0.00 |     |   |
| BP | 0046 | negative regulation of receptor signaling pathway via JAK-STAT                 | 3/292 | 233  | 364  | 403 | 3 |
|    | 426  |                                                                                |       | 28   | 073  | 49  |   |
|    | GO:  |                                                                                | 25/   | 0.00 | 0.00 |     |   |
| BP | 0060 | regulation of cilium movement involved in cell motility                        | 3/292 | 233  | 364  | 403 | 3 |
|    | 295  |                                                                                |       | 28   | 073  | 49  |   |
|    | GO:  |                                                                                | 25/   | 0.00 | 0.00 |     |   |
| BP | 0061 | positive regulation of mesonephros development                                 | 3/292 | 233  | 364  | 403 | 3 |
|    | 213  |                                                                                |       | 28   | 073  | 49  |   |

|    |      |                                                                    |       |     |      |      |   |
|----|------|--------------------------------------------------------------------|-------|-----|------|------|---|
|    | GO:  |                                                                    |       | 25/ | 0.00 | 0.00 |   |
| BP | 1901 | negative regulation of response to reactive oxygen species         | 3/292 | 233 | 364  | 403  | 3 |
|    | 032  |                                                                    |       | 28  | 073  | 49   |   |
|    | GO:  |                                                                    |       | 25/ | 0.00 | 0.00 |   |
| BP | 1902 | regulation of cilium-dependent cell motility                       | 3/292 | 233 | 364  | 403  | 3 |
|    | 019  |                                                                    |       | 28  | 073  | 49   |   |
|    | GO:  |                                                                    |       | 25/ | 0.00 | 0.00 |   |
| BP | 1902 | positive regulation of amyloid precursor protein catabolic process | 3/292 | 233 | 364  | 403  | 3 |
|    | 993  |                                                                    |       | 28  | 073  | 49   |   |
|    | GO:  |                                                                    |       | 25/ | 0.00 | 0.00 |   |
| BP | 1903 | positive regulation of glycoprotein metabolic process              | 3/292 | 233 | 364  | 403  | 3 |
|    | 020  |                                                                    |       | 28  | 073  | 49   |   |
|    | GO:  |                                                                    |       | 25/ | 0.00 | 0.00 |   |
| BP | 1903 | negative regulation of hydrogen peroxide-induced cell death        | 3/292 | 233 | 364  | 403  | 3 |
|    | 206  |                                                                    |       | 28  | 073  | 49   |   |
|    | GO:  |                                                                    |       | 25/ | 0.00 | 0.00 |   |
| BP | 2000 | positive regulation of fatty acid transport                        | 3/292 | 233 | 364  | 403  | 3 |
|    | 193  |                                                                    |       | 28  | 073  | 49   |   |
|    | GO:  |                                                                    |       | 82/ | 0.00 | 0.00 |   |
| BP | 0001 | positive regulation of leukocyte mediated cytotoxicity             | 5/292 | 233 | 369  | 409  | 5 |
|    | 912  |                                                                    |       | 28  | 525  | 041  |   |
|    | GO:  |                                                                    |       | 82/ | 0.00 | 0.00 |   |
| BP | 0050 | negative regulation of synaptic transmission                       | 5/292 | 233 | 369  | 409  | 5 |
|    | 805  |                                                                    |       | 28  | 525  | 041  |   |
|    | GO:  |                                                                    |       | 51/ | 0.00 | 0.00 |   |
| BP | 0031 | dsRNA processing                                                   | 4/292 | 233 | 378  | 417  | 4 |
|    | 050  |                                                                    |       | 28  | 576  | 806  |   |
|    | GO:  |                                                                    |       | 51/ | 0.00 | 0.00 |   |
| BP | 0043 | mast cell degranulation                                            | 4/292 | 233 | 378  | 417  | 4 |
|    | 303  |                                                                    |       | 28  | 576  | 806  |   |
|    | GO:  |                                                                    |       | 51/ | 0.00 | 0.00 |   |
| BP | 0060 | regulation of cardiac muscle cell proliferation                    | 4/292 | 233 | 378  | 417  | 4 |
|    | 043  |                                                                    |       | 28  | 576  | 806  |   |
|    | GO:  |                                                                    |       | 51/ | 0.00 | 0.00 |   |
| BP | 0060 | ventricular septum morphogenesis                                   | 4/292 | 233 | 378  | 417  | 4 |
|    | 412  |                                                                    |       | 28  | 576  | 806  |   |
|    | GO:  |                                                                    |       | 51/ | 0.00 | 0.00 |   |
| BP | 0070 | production of small RNA involved in gene silencing by RNA          | 4/292 | 233 | 378  | 417  | 4 |
|    | 918  |                                                                    |       | 28  | 576  | 806  |   |
|    | GO:  |                                                                    |       | 158 | 0.00 | 0.00 |   |
| BP | 0034 | positive regulation of cellular amide metabolic process            | 7/292 | /23 | 383  | 423  | 7 |
|    | 250  |                                                                    |       | 328 | 865  | 138  |   |

|    |                                                                  |       |     |      |      |   |
|----|------------------------------------------------------------------|-------|-----|------|------|---|
|    | GO:                                                              |       | 158 | 0.00 | 0.00 |   |
| BP | 0055 monovalent inorganic cation homeostasis                     | 7/292 | /23 | 383  | 423  | 7 |
|    | 067                                                              |       | 328 | 865  | 138  |   |
|    | GO:                                                              |       | 83/ | 0.00 | 0.00 |   |
| BP | 0030 platelet activation                                         | 5/292 | 233 | 389  | 428  | 5 |
|    | 168                                                              |       | 28  | 269  | 583  |   |
|    | GO:                                                              |       | 83/ | 0.00 | 0.00 |   |
| BP | 0060 muscle tissue morphogenesis                                 | 5/292 | 233 | 389  | 428  | 5 |
|    | 415                                                              |       | 28  | 269  | 583  |   |
|    | GO:                                                              |       | 159 | 0.00 | 0.00 |   |
| BP | 1903 regulation of viral life cycle                              | 7/292 | /23 | 397  | 437  | 7 |
|    | 900                                                              |       | 328 | 355  | 224  |   |
|    | GO:                                                              |       | 52/ | 0.00 | 0.00 |   |
| BP | 0002 mast cell activation involved in immune response            | 4/292 | 233 | 406  | 444  | 4 |
|    | 279                                                              |       | 28  | 149  | 989  |   |
|    | GO:                                                              |       | 52/ | 0.00 | 0.00 |   |
| BP | 0002 mast cell mediated immunity                                 | 4/292 | 233 | 406  | 444  | 4 |
|    | 448                                                              |       | 28  | 149  | 989  |   |
|    | GO:                                                              |       | 52/ | 0.00 | 0.00 |   |
| BP | 0045 positive regulation of muscle contraction                   | 4/292 | 233 | 406  | 444  | 4 |
|    | 933                                                              |       | 28  | 149  | 989  |   |
|    | GO:                                                              |       | 52/ | 0.00 | 0.00 |   |
| BP | 0060 adipose tissue development                                  | 4/292 | 233 | 406  | 444  | 4 |
|    | 612                                                              |       | 28  | 149  | 989  |   |
|    | GO:                                                              |       | 26/ | 0.00 | 0.00 |   |
| BP | 0001 neutrophil homeostasis                                      | 3/292 | 233 | 407  | 444  | 3 |
|    | 780                                                              |       | 28  | 788  | 989  |   |
|    | GO:                                                              |       | 26/ | 0.00 | 0.00 |   |
| BP | 0003 positive regulation of systemic arterial blood pressure     | 3/292 | 233 | 407  | 444  | 3 |
|    | 084                                                              |       | 28  | 788  | 989  |   |
|    | GO:                                                              |       | 26/ | 0.00 | 0.00 |   |
| BP | 0032 regulation of icosanoid secretion                           | 3/292 | 233 | 407  | 444  | 3 |
|    | 303                                                              |       | 28  | 788  | 989  |   |
|    | GO:                                                              |       | 26/ | 0.00 | 0.00 |   |
| BP | 0034 positive regulation of toll-like receptor signaling pathway | 3/292 | 233 | 407  | 444  | 3 |
|    | 123                                                              |       | 28  | 788  | 989  |   |
|    | GO:                                                              |       | 26/ | 0.00 | 0.00 |   |
| BP | 0060 uterus development                                          | 3/292 | 233 | 407  | 444  | 3 |
|    | 065                                                              |       | 28  | 788  | 989  |   |
|    | GO:                                                              |       | 26/ | 0.00 | 0.00 |   |
| BP | 0060 regulation of type I interferon-mediated signaling pathway  | 3/292 | 233 | 407  | 444  | 3 |
|    | 338                                                              |       | 28  | 788  | 989  |   |

|    |                                                                     |       |     |      |      |   |
|----|---------------------------------------------------------------------|-------|-----|------|------|---|
|    | GO:                                                                 |       | 26/ | 0.00 | 0.00 |   |
| BP | 0071 cellular response to dexamethasone stimulus                    | 3/292 | 233 | 407  | 444  | 3 |
|    | 549                                                                 |       | 28  | 788  | 989  |   |
|    | GO:                                                                 |       | 26/ | 0.00 | 0.00 |   |
| BP | 0090 regulation of branching involved in ureteric bud morphogenesis | 3/292 | 233 | 407  | 444  | 3 |
|    | 189                                                                 |       | 28  | 788  | 989  |   |
|    | GO:                                                                 |       | 26/ | 0.00 | 0.00 |   |
| BP | 0090 positive regulation of calcium ion import                      | 3/292 | 233 | 407  | 444  | 3 |
|    | 280                                                                 |       | 28  | 788  | 989  |   |
|    | GO:                                                                 |       | 26/ | 0.00 | 0.00 |   |
| BP | 1904 negative regulation of receptor signaling pathway via STAT     | 3/292 | 233 | 407  | 444  | 3 |
|    | 893                                                                 |       | 28  | 788  | 989  |   |
|    | GO:                                                                 |       | 84/ | 0.00 | 0.00 |   |
| BP | 0003 outflow tract morphogenesis                                    | 5/292 | 233 | 409  | 446  | 5 |
|    | 151                                                                 |       | 28  | 757  | 873  |   |
|    | GO:                                                                 |       | 121 | 0.00 | 0.00 |   |
| BP | 0046 regulation of organ growth                                     | 6/292 | /23 | 422  | 460  | 6 |
|    | 620                                                                 |       | 328 | 621  | 631  |   |
|    | GO:                                                                 |       | 161 | 0.00 | 0.00 |   |
| BP | 0006 steroid biosynthetic process                                   | 7/292 | /23 | 425  | 463  | 7 |
|    | 694                                                                 |       | 328 | 41   | 396  |   |
|    | GO:                                                                 |       | 53/ | 0.00 | 0.00 |   |
| BP | 0001 negative regulation of cytokine-mediated signaling pathway     | 4/292 | 233 | 435  | 472  | 4 |
|    | 960                                                                 |       | 28  | 048  | 501  |   |
|    | GO:                                                                 |       | 53/ | 0.00 | 0.00 |   |
| BP | 0032 regulation of sterol transport                                 | 4/292 | 233 | 435  | 472  | 4 |
|    | 371                                                                 |       | 28  | 048  | 501  |   |
|    | GO:                                                                 |       | 53/ | 0.00 | 0.00 |   |
| BP | 0032 regulation of cholesterol transport                            | 4/292 | 233 | 435  | 472  | 4 |
|    | 374                                                                 |       | 28  | 048  | 501  |   |
|    | GO:                                                                 |       | 53/ | 0.00 | 0.00 |   |
| BP | 0032 negative regulation of tumor necrosis factor production        | 4/292 | 233 | 435  | 472  | 4 |
|    | 720                                                                 |       | 28  | 048  | 501  |   |
|    | GO:                                                                 |       | 53/ | 0.00 | 0.00 |   |
| BP | 0061 trabecula morphogenesis                                        | 4/292 | 233 | 435  | 472  | 4 |
|    | 383                                                                 |       | 28  | 048  | 501  |   |
|    | GO:                                                                 |       | 205 | 0.00 | 0.00 |   |
| BP | 0048 cell maturation                                                | 8/292 | /23 | 443  | 481  | 8 |
|    | 469                                                                 |       | 328 | 16   | 028  |   |
|    | GO:                                                                 |       | 86/ | 0.00 | 0.00 |   |
| BP | 0061 renal tubule morphogenesis                                     | 5/292 | 233 | 453  | 490  | 5 |
|    | 333                                                                 |       | 28  | 024  | 514  |   |

|    |                                                                                      |       |     |      |      |   |
|----|--------------------------------------------------------------------------------------|-------|-----|------|------|---|
|    | GO:                                                                                  |       | 27/ | 0.00 | 0.00 |   |
| BP | 0003 atrioventricular valve development                                              | 3/292 | 233 | 454  | 490  | 3 |
|    | 171                                                                                  |       | 28  | 558  | 514  |   |
|    | GO:                                                                                  |       | 27/ | 0.00 | 0.00 |   |
| BP | 0003 metanephros morphogenesis                                                       | 3/292 | 233 | 454  | 490  | 3 |
|    | 338                                                                                  |       | 28  | 558  | 514  |   |
|    | GO:                                                                                  |       | 27/ | 0.00 | 0.00 |   |
| BP | 0032 regulation of activin receptor signaling pathway                                | 3/292 | 233 | 454  | 490  | 3 |
|    | 925                                                                                  |       | 28  | 558  | 514  |   |
|    | GO:                                                                                  |       | 27/ | 0.00 | 0.00 |   |
| BP | 0039 cytoplasmic pattern recognition receptor signaling pathway in response to virus | 3/292 | 233 | 454  | 490  | 3 |
|    | 528                                                                                  |       | 28  | 558  | 514  |   |
|    | GO:                                                                                  |       | 27/ | 0.00 | 0.00 |   |
| BP | 0042 positive regulation of circadian rhythm                                         | 3/292 | 233 | 454  | 490  | 3 |
|    | 753                                                                                  |       | 28  | 558  | 514  |   |
|    | GO:                                                                                  |       | 27/ | 0.00 | 0.00 |   |
| BP | 0060 positive regulation of cardiac muscle cell proliferation                        | 3/292 | 233 | 454  | 490  | 3 |
|    | 045                                                                                  |       | 28  | 558  | 514  |   |
|    | GO:                                                                                  |       | 27/ | 0.00 | 0.00 |   |
| BP | 1900 positive regulation of cytokine production involved in inflammatory response    | 3/292 | 233 | 454  | 490  | 3 |
|    | 017                                                                                  |       | 28  | 558  | 514  |   |
|    | GO:                                                                                  |       | 27/ | 0.00 | 0.00 |   |
| BP | 1900 regulation of receptor binding                                                  | 3/292 | 233 | 454  | 490  | 3 |
|    | 120                                                                                  |       | 28  | 558  | 514  |   |
|    | GO:                                                                                  |       | 27/ | 0.00 | 0.00 |   |
| BP | 2000 positive regulation of cardiac muscle cell differentiation                      | 3/292 | 233 | 454  | 490  | 3 |
|    | 727                                                                                  |       | 28  | 558  | 514  |   |
|    | GO:                                                                                  |       | 206 | 0.00 | 0.00 |   |
| BP | 1902 regulation of organelle assembly                                                | 8/292 | /23 | 456  | 491  | 8 |
|    | 115                                                                                  |       | 328 | 2    | 999  |   |
|    | GO:                                                                                  |       | 123 | 0.00 | 0.00 |   |
| BP | 0048 digestive tract development                                                     | 6/292 | /23 | 457  | 493  | 6 |
|    | 565                                                                                  |       | 328 | 743  | 374  |   |
|    | GO:                                                                                  |       | 54/ | 0.00 | 0.00 |   |
| BP | 0051 positive regulation of amine transport                                          | 4/292 | 233 | 465  | 500  | 4 |
|    | 954                                                                                  |       | 28  | 303  | 353  |   |
|    | GO:                                                                                  |       | 54/ | 0.00 | 0.00 |   |
| BP | 0061 chaperone-mediated protein folding                                              | 4/292 | 233 | 465  | 500  | 4 |
|    | 077                                                                                  |       | 28  | 303  | 353  |   |
|    | GO:                                                                                  |       | 54/ | 0.00 | 0.00 |   |
| BP | 1902 regulation of alcohol biosynthetic process                                      | 4/292 | 233 | 465  | 500  | 4 |
|    | 930                                                                                  |       | 28  | 303  | 353  |   |

|    |      |                                                                              |        |      |      |     |
|----|------|------------------------------------------------------------------------------|--------|------|------|-----|
|    | GO:  |                                                                              | 54/    | 0.00 | 0.00 |     |
| BP | 1903 | negative regulation of tumor necrosis factor superfamily cytokine production | 4/292  | 233  | 465  | 500 |
|    | 556  |                                                                              |        | 28   | 303  | 353 |
|    | GO:  |                                                                              | 451/   | 0.00 | 0.00 |     |
| BP | 0045 | negative regulation of cell cycle                                            | 13/292 | 723  | 473  | 508 |
|    | 786  |                                                                              |        | 328  | 528  | 902 |
|    | GO:  |                                                                              | 87/    | 0.00 | 0.00 |     |
| BP | 0060 | regulation of heart growth                                                   | 5/292  | 233  | 475  | 511 |
|    | 420  |                                                                              |        | 28   | 833  | 081 |
|    | GO:  |                                                                              | 55/    | 0.00 | 0.00 |     |
| BP | 0045 | negative regulation of carbohydrate metabolic process                        | 4/292  | 233  | 496  | 533 |
|    | 912  |                                                                              |        | 28   | 94   | 298 |
|    | GO:  |                                                                              | 209/   | 0.00 | 0.00 |     |
| BP | 0098 | cell-cell adhesion via plasma-membrane adhesion molecules                    | 8/292  | 723  | 497  | 533 |
|    | 742  |                                                                              |        | 328  | 095  | 298 |
|    | GO:  |                                                                              | 88/    | 0.00 | 0.00 |     |
| BP | 0008 | regulation of Notch signaling pathway                                        | 5/292  | 233  | 499  | 535 |
|    | 593  |                                                                              |        | 28   | 446  | 509 |
|    | GO:  |                                                                              | 28/    | 0.00 | 0.00 |     |
| BP | 0007 | synaptic transmission, cholinergic                                           | 3/292  | 233  | 504  | 538 |
|    | 271  |                                                                              |        | 28   | 443  | 674 |
|    | GO:  |                                                                              | 28/    | 0.00 | 0.00 |     |
| BP | 0010 | regulation of protein kinase A signaling                                     | 3/292  | 233  | 504  | 538 |
|    | 738  |                                                                              |        | 28   | 443  | 674 |
|    | GO:  |                                                                              | 28/    | 0.00 | 0.00 |     |
| BP | 0045 | thymic T cell selection                                                      | 3/292  | 233  | 504  | 538 |
|    | 061  |                                                                              |        | 28   | 443  | 674 |
|    | GO:  |                                                                              | 28/    | 0.00 | 0.00 |     |
| BP | 0045 | positive regulation of erythrocyte differentiation                           | 3/292  | 233  | 504  | 538 |
|    | 648  |                                                                              |        | 28   | 443  | 674 |
|    | GO:  |                                                                              | 28/    | 0.00 | 0.00 |     |
| BP | 0061 | regulation of mesonephros development                                        | 3/292  | 233  | 504  | 538 |
|    | 217  |                                                                              |        | 28   | 443  | 674 |
|    | GO:  |                                                                              | 28/    | 0.00 | 0.00 |     |
| BP | 1900 | positive regulation of p38MAPK cascade                                       | 3/292  | 233  | 504  | 538 |
|    | 745  |                                                                              |        | 28   | 443  | 674 |
|    | GO:  |                                                                              | 28/    | 0.00 | 0.00 |     |
| BP | 1903 | negative regulation of sprouting angiogenesis                                | 3/292  | 233  | 504  | 538 |
|    | 671  |                                                                              |        | 28   | 443  | 674 |
|    | GO:  |                                                                              | 89/    | 0.00 | 0.00 |     |
| BP | 0001 | metanephros development                                                      | 5/292  | 233  | 523  | 558 |
|    | 656  |                                                                              |        | 28   | 879  | 783 |



|    |                                                                   |        |     |      |      |   |
|----|-------------------------------------------------------------------|--------|-----|------|------|---|
|    | GO:                                                               |        | 89/ | 0.00 | 0.00 |   |
| BP | 0051 interaction with symbiont                                    | 5/292  | 233 | 523  | 558  | 5 |
|    | 702                                                               |        | 28  | 879  | 783  |   |
|    | GO:                                                               |        | 405 | 0.00 | 0.00 |   |
| BP | 0051 negative regulation of hydrolase activity                    | 12/292 | /23 | 528  | 563  | 1 |
|    | 346                                                               |        | 328 | 658  | 555  | 2 |
|    | GO:                                                               |        | 56/ | 0.00 | 0.00 |   |
| BP | 0050 negative regulation of peptidyl-tyrosine phosphorylation     | 4/292  | 233 | 529  | 564  | 4 |
|    | 732                                                               |        | 28  | 989  | 322  |   |
|    | GO:                                                               |        | 56/ | 0.00 | 0.00 |   |
| BP | 0050 brown fat cell differentiation                               | 4/292  | 233 | 529  | 564  | 4 |
|    | 873                                                               |        | 28  | 989  | 322  |   |
|    | GO:                                                               |        | 127 | 0.00 | 0.00 |   |
| BP | 0051 regulation of DNA binding                                    | 6/292  | /23 | 534  | 568  | 6 |
|    | 101                                                               |        | 328 | 372  | 66   |   |
|    | GO:                                                               |        | 90/ | 0.00 | 0.00 |   |
| BP | 0019 transmission of nerve impulse                                | 5/292  | 233 | 549  | 584  | 5 |
|    | 226                                                               |        | 28  | 145  | 044  |   |
|    | GO:                                                               |        | 29/ | 0.00 | 0.00 |   |
| BP | 0010 positive regulation of steroid biosynthetic process          | 3/292  | 233 | 557  | 590  | 3 |
|    | 893                                                               |        | 28  | 498  | 885  |   |
|    | GO:                                                               |        | 29/ | 0.00 | 0.00 |   |
| BP | 0045 intermediate filament organization                           | 3/292  | 233 | 557  | 590  | 3 |
|    | 109                                                               |        | 28  | 498  | 885  |   |
|    | GO:                                                               |        | 29/ | 0.00 | 0.00 |   |
| BP | 0045 regulation of regulatory T cell differentiation              | 3/292  | 233 | 557  | 590  | 3 |
|    | 589                                                               |        | 28  | 498  | 885  |   |
|    | GO:                                                               |        | 29/ | 0.00 | 0.00 |   |
| BP | 0060 morphogenesis of an epithelial fold                          | 3/292  | 233 | 557  | 590  | 3 |
|    | 571                                                               |        | 28  | 498  | 885  |   |
|    | GO:                                                               |        | 29/ | 0.00 | 0.00 |   |
| BP | 0071 response to dexamethasone                                    | 3/292  | 233 | 557  | 590  | 3 |
|    | 548                                                               |        | 28  | 498  | 885  |   |
|    | GO:                                                               |        | 29/ | 0.00 | 0.00 |   |
| BP | 1900 positive regulation of cellular response to insulin stimulus | 3/292  | 233 | 557  | 590  | 3 |
|    | 078                                                               |        | 28  | 498  | 885  |   |
|    | GO:                                                               |        | 408 | 0.00 | 0.00 |   |
| BP | 0006 fatty acid metabolic process                                 | 12/292 | /23 | 559  | 592  | 1 |
|    | 631                                                               |        | 328 | 694  | 872  | 2 |
|    | GO:                                                               |        | 57/ | 0.00 | 0.00 |   |
| BP | 0002 glandular epithelial cell differentiation                    | 4/292  | 233 | 564  | 596  | 4 |
|    | 067                                                               |        | 28  | 476  | 568  |   |

|    |      |                                                      |        |      |      |     |   |
|----|------|------------------------------------------------------|--------|------|------|-----|---|
|    | GO:  |                                                      | 57/    | 0.00 | 0.00 |     |   |
| BP | 0007 | respiratory gaseous exchange by respiratory system   | 4/292  | 233  | 564  | 596 | 4 |
|    | 585  |                                                      |        | 28   | 476  | 568 |   |
|    | GO:  |                                                      | 57/    | 0.00 | 0.00 |     |   |
| BP | 0010 | mesenchymal cell proliferation                       | 4/292  | 233  | 564  | 596 | 4 |
|    | 463  |                                                      |        | 28   | 476  | 568 |   |
|    | GO:  |                                                      | 57/    | 0.00 | 0.00 |     |   |
| BP | 0060 | negative regulation of response to cytokine stimulus | 4/292  | 233  | 564  | 596 | 4 |
|    | 761  |                                                      |        | 28   | 476  | 568 |   |
|    | GO:  |                                                      | 308    | 0.00 | 0.00 |     | 1 |
| BP | 0006 | nucleocytoplasmic transport                          | 10/292 | /23  | 568  | 599 | 0 |
|    | 913  |                                                      |        | 328  | 112  | 724 |   |
|    | GO:  |                                                      | 308    | 0.00 | 0.00 |     | 1 |
| BP | 0051 | nuclear transport                                    | 10/292 | /23  | 568  | 599 | 0 |
|    | 169  |                                                      |        | 328  | 112  | 724 |   |
|    | GO:  |                                                      | 214    | 0.00 | 0.00 |     |   |
| BP | 0007 | cell-matrix adhesion                                 | 8/292  | /23  | 571  | 602 | 8 |
|    | 160  |                                                      |        | 328  | 425  | 876 |   |
|    | GO:  |                                                      | 91/    | 0.00 | 0.00 |     |   |
| BP | 0040 | regulation of multicellular organism growth          | 5/292  | 233  | 575  | 606 | 5 |
|    | 014  |                                                      |        | 28   | 259  | 574 |   |
|    | GO:  |                                                      | 215    | 0.00 | 0.00 |     |   |
| BP | 1901 | regulation of cell junction assembly                 | 8/292  | /23  | 587  | 618 | 8 |
|    | 888  |                                                      |        | 328  | 256  | 87  |   |
|    | GO:  |                                                      | 130    | 0.00 | 0.00 |     |   |
| BP | 0050 | T cell receptor signaling pathway                    | 6/292  | /23  | 597  | 629 | 6 |
|    | 852  |                                                      |        | 328  | 717  | 535 |   |
|    | GO:  |                                                      | 58/    | 0.00 | 0.00 |     |   |
| BP | 0035 | response to interferon-beta                          | 4/292  | 233  | 600  | 631 | 4 |
|    | 456  |                                                      |        | 28   | 429  | 31  |   |
|    | GO:  |                                                      | 58/    | 0.00 | 0.00 |     |   |
| BP | 0042 | natural killer cell mediated cytotoxicity            | 4/292  | 233  | 600  | 631 | 4 |
|    | 267  |                                                      |        | 28   | 429  | 31  |   |
|    | GO:  |                                                      | 58/    | 0.00 | 0.00 |     |   |
| BP | 0051 | regulation of meiotic cell cycle                     | 4/292  | 233  | 600  | 631 | 4 |
|    | 445  |                                                      |        | 28   | 429  | 31  |   |
|    | GO:  |                                                      | 311    | 0.00 | 0.00 |     | 1 |
| BP | 0009 | negative regulation of catabolic process             | 10/292 | /23  | 606  | 637 | 0 |
|    | 895  |                                                      |        | 328  | 891  | 378 |   |
|    | GO:  |                                                      | 311    | 0.00 | 0.00 |     | 1 |
| BP | 0090 | sensory organ morphogenesis                          | 10/292 | /23  | 606  | 637 | 0 |
|    | 596  |                                                      |        | 328  | 891  | 378 |   |

|    |                                                   |       |     |      |      |   |
|----|---------------------------------------------------|-------|-----|------|------|---|
|    | GO:                                               |       | 30/ | 0.00 | 0.00 |   |
| BP | 0002 T cell lineage commitment                    | 3/292 | 233 | 613  | 642  | 3 |
|    | 360                                               |       | 28  | 778  | 782  |   |
|    | GO:                                               |       | 30/ | 0.00 | 0.00 |   |
| BP | 0010 regulation of cholesterol efflux             | 3/292 | 233 | 613  | 642  | 3 |
|    | 874                                               |       | 28  | 778  | 782  |   |
|    | GO:                                               |       | 30/ | 0.00 | 0.00 |   |
| BP | 0050 sensory perception of temperature stimulus   | 3/292 | 233 | 613  | 642  | 3 |
|    | 951                                               |       | 28  | 778  | 782  |   |
|    | GO:                                               |       | 30/ | 0.00 | 0.00 |   |
| BP | 0051 positive regulation of amino acid transport  | 3/292 | 233 | 613  | 642  | 3 |
|    | 957                                               |       | 28  | 778  | 782  |   |
|    | GO:                                               |       | 30/ | 0.00 | 0.00 |   |
| BP | 0060 cardiac epithelial to mesenchymal transition | 3/292 | 233 | 613  | 642  | 3 |
|    | 317                                               |       | 28  | 778  | 782  |   |
|    | GO:                                               |       | 217 | 0.00 | 0.00 |   |
| BP | 0007 circadian rhythm                             | 8/292 | /23 | 619  | 648  | 8 |
|    | 623                                               |       | 328 | 917  | 194  |   |
|    | GO:                                               |       | 217 | 0.00 | 0.00 |   |
| BP | 0031 cellular response to extracellular stimulus  | 8/292 | /23 | 619  | 648  | 8 |
|    | 668                                               |       | 328 | 917  | 194  |   |
|    | GO:                                               |       | 131 | 0.00 | 0.00 |   |
| BP | 0031 receptor internalization                     | 6/292 | /23 | 619  | 648  | 6 |
|    | 623                                               |       | 328 | 999  | 194  |   |
|    | GO:                                               |       | 93/ | 0.00 | 0.00 |   |
| BP | 0002 regulation of sodium ion transport           | 5/292 | 233 | 630  | 658  | 5 |
|    | 028                                               |       | 28  | 093  | 374  |   |
|    | GO:                                               |       | 59/ | 0.00 | 0.00 |   |
| BP | 0043 regulation of ATPase activity                | 4/292 | 233 | 637  | 666  | 4 |
|    | 462                                               |       | 28  | 874  | 126  |   |
|    | GO:                                               |       | 132 | 0.00 | 0.00 |   |
| BP | 0009 detection of abiotic stimulus                | 6/292 | /23 | 642  | 670  | 6 |
|    | 582                                               |       | 328 | 88   | 975  |   |
|    | GO:                                               |       | 10/ | 0.00 | 0.00 |   |
| BP | 0002 marginal zone B cell differentiation         | 2/292 | 233 | 657  | 677  | 2 |
|    | 315                                               |       | 28  | 565  | 11   |   |
|    | GO:                                               |       | 10/ | 0.00 | 0.00 |   |
| BP | 0002 positive regulation of tolerance induction   | 2/292 | 233 | 657  | 677  | 2 |
|    | 645                                               |       | 28  | 565  | 11   |   |
|    | GO:                                               |       | 10/ | 0.00 | 0.00 |   |
| BP | 0003 membranous septum morphogenesis              | 2/292 | 233 | 657  | 677  | 2 |
|    | 149                                               |       | 28  | 565  | 11   |   |

|    |                                                                           |       |     |      |      |   |
|----|---------------------------------------------------------------------------|-------|-----|------|------|---|
|    | GO:                                                                       |       | 10/ | 0.00 | 0.00 |   |
| BP | 0006 ornithine metabolic process                                          | 2/292 | 233 | 657  | 677  | 2 |
|    | 591                                                                       |       | 28  | 565  | 11   |   |
|    | GO:                                                                       |       | 10/ | 0.00 | 0.00 |   |
| BP | 0010 regulation of alkaline phosphatase activity                          | 2/292 | 233 | 657  | 677  | 2 |
|    | 692                                                                       |       | 28  | 565  | 11   |   |
|    | GO:                                                                       |       | 10/ | 0.00 | 0.00 |   |
| BP | 0010 negative regulation of macrophage derived foam cell differentiation  | 2/292 | 233 | 657  | 677  | 2 |
|    | 745                                                                       |       | 28  | 565  | 11   |   |
|    | GO:                                                                       |       | 10/ | 0.00 | 0.00 |   |
| BP | 0021 facial nerve structural organization                                 | 2/292 | 233 | 657  | 677  | 2 |
|    | 612                                                                       |       | 28  | 565  | 11   |   |
|    | GO:                                                                       |       | 10/ | 0.00 | 0.00 |   |
| BP | 0021 substrate-independent telencephalic tangential migration             | 2/292 | 233 | 657  | 677  | 2 |
|    | 826                                                                       |       | 28  | 565  | 11   |   |
|    | GO:                                                                       |       | 10/ | 0.00 | 0.00 |   |
| BP | 0021 substrate-independent telencephalic tangential interneuron migration | 2/292 | 233 | 657  | 677  | 2 |
|    | 843                                                                       |       | 28  | 565  | 11   |   |
|    | GO:                                                                       |       | 10/ | 0.00 | 0.00 |   |
| BP | 0032 positive regulation of activin receptor signaling pathway            | 2/292 | 233 | 657  | 677  | 2 |
|    | 927                                                                       |       | 28  | 565  | 11   |   |
|    | GO:                                                                       |       | 10/ | 0.00 | 0.00 |   |
| BP | 0033 regulation of neutrophil apoptotic process                           | 2/292 | 233 | 657  | 677  | 2 |
|    | 029                                                                       |       | 28  | 565  | 11   |   |
|    | GO:                                                                       |       | 10/ | 0.00 | 0.00 |   |
| BP | 0035 dorsal aorta development                                             | 2/292 | 233 | 657  | 677  | 2 |
|    | 907                                                                       |       | 28  | 565  | 11   |   |
|    | GO: negative regulation of viral-induced                                  |       | 10/ | 0.00 | 0.00 |   |
| BP | 0039 cytoplasmic pattern recognition receptor signaling pathway           | 2/292 | 233 | 657  | 677  | 2 |
|    | 532                                                                       |       | 28  | 565  | 11   |   |
|    | GO:                                                                       |       | 10/ | 0.00 | 0.00 |   |
| BP | 0051 negative regulation of nitric-oxide synthase activity                | 2/292 | 233 | 657  | 677  | 2 |
|    | 001                                                                       |       | 28  | 565  | 11   |   |
|    | GO:                                                                       |       | 10/ | 0.00 | 0.00 |   |
| BP | 0060 lung-associated mesenchyme development                               | 2/292 | 233 | 657  | 677  | 2 |
|    | 484                                                                       |       | 28  | 565  | 11   |   |
|    | GO:                                                                       |       | 10/ | 0.00 | 0.00 |   |
| BP | 0060 prostatic bud formation                                              | 2/292 | 233 | 657  | 677  | 2 |
|    | 513                                                                       |       | 28  | 565  | 11   |   |
|    | GO:                                                                       |       | 10/ | 0.00 | 0.00 |   |
| BP | 0060 chorio-allantoic fusion                                              | 2/292 | 233 | 657  | 677  | 2 |
|    | 710                                                                       |       | 28  | 565  | 11   |   |

|    |      |                                                         |       |      |      |       |
|----|------|---------------------------------------------------------|-------|------|------|-------|
|    | GO:  |                                                         | 10/   | 0.00 | 0.00 |       |
| BP | 0060 | positive regulation of macrophage cytokine production   | 2/292 | 233  | 657  | 677 2 |
|    | 907  |                                                         |       | 28   | 565  | 11    |
|    | GO:  |                                                         | 10/   | 0.00 | 0.00 |       |
| BP | 0070 | response to lipoteichoic acid                           | 2/292 | 233  | 657  | 677 2 |
|    | 391  |                                                         |       | 28   | 565  | 11    |
|    | GO:  |                                                         | 10/   | 0.00 | 0.00 |       |
| BP | 0070 | response to interleukin-18                              | 2/292 | 233  | 657  | 677 2 |
|    | 673  |                                                         |       | 28   | 565  | 11    |
|    | GO:  |                                                         | 10/   | 0.00 | 0.00 |       |
| BP | 0070 | regulation of bile acid biosynthetic process            | 2/292 | 233  | 657  | 677 2 |
|    | 857  |                                                         |       | 28   | 565  | 11    |
|    | GO:  |                                                         | 10/   | 0.00 | 0.00 |       |
| BP | 0071 | cellular response to lipoteichoic acid                  | 2/292 | 233  | 657  | 677 2 |
|    | 223  |                                                         |       | 28   | 565  | 11    |
|    | GO:  |                                                         | 10/   | 0.00 | 0.00 |       |
| BP | 0090 | positive regulation of extracellular matrix disassembly | 2/292 | 233  | 657  | 677 2 |
|    | 091  |                                                         |       | 28   | 565  | 11    |
|    | GO:  |                                                         | 10/   | 0.00 | 0.00 |       |
| BP | 0090 | regulation of pancreatic juice secretion                | 2/292 | 233  | 657  | 677 2 |
|    | 186  |                                                         |       | 28   | 565  | 11    |
|    | GO:  |                                                         | 94/   | 0.00 | 0.00 |       |
| BP | 0015 | fatty acid transport                                    | 5/292 | 233  | 658  | 678 5 |
|    | 908  |                                                         |       | 28   | 842  | 046   |
|    | GO:  |                                                         | 133   | 0.00 | 0.00 |       |
| BP | 0009 | detection of external stimulus                          | 6/292 | /23  | 666  | 685 6 |
|    | 581  |                                                         |       | 328  | 369  | 41    |
|    | GO:  |                                                         | 31/   | 0.00 | 0.00 |       |
| BP | 0007 | sex determination                                       | 3/292 | 233  | 673  | 689 3 |
|    | 530  |                                                         |       | 28   | 329  | 494   |
|    | GO:  |                                                         | 31/   | 0.00 | 0.00 |       |
| BP | 0032 | positive regulation of sterol transport                 | 3/292 | 233  | 673  | 689 3 |
|    | 373  |                                                         |       | 28   | 329  | 494   |
|    | GO:  |                                                         | 31/   | 0.00 | 0.00 |       |
| BP | 0032 | positive regulation of cholesterol transport            | 3/292 | 233  | 673  | 689 3 |
|    | 376  |                                                         |       | 28   | 329  | 494   |
|    | GO:  |                                                         | 31/   | 0.00 | 0.00 |       |
| BP | 0050 | leukocyte tethering or rolling                          | 3/292 | 233  | 673  | 689 3 |
|    | 901  |                                                         |       | 28   | 329  | 494   |
|    | GO:  |                                                         | 31/   | 0.00 | 0.00 |       |
| BP | 0061 | positive regulation of cartilage development            | 3/292 | 233  | 673  | 689 3 |
|    | 036  |                                                         |       | 28   | 329  | 494   |

|    |                                                           |        |     |      |      |   |
|----|-----------------------------------------------------------|--------|-----|------|------|---|
|    | GO:                                                       |        | 31/ | 0.00 | 0.00 |   |
| BP | 0061 negative regulation of cartilage development         | 3/292  | 233 | 673  | 689  | 3 |
|    | 037                                                       |        | 28  | 329  | 494  |   |
|    | GO:                                                       |        | 31/ | 0.00 | 0.00 |   |
| BP | 1901 negative regulation of cell junction assembly        | 3/292  | 233 | 673  | 689  | 3 |
|    | 889                                                       |        | 28  | 329  | 494  |   |
|    | GO:                                                       |        | 31/ | 0.00 | 0.00 |   |
| BP | 1902 positive regulation of alcohol biosynthetic process  | 3/292  | 233 | 673  | 689  | 3 |
|    | 932                                                       |        | 28  | 329  | 494  |   |
|    | GO:                                                       |        | 60/ | 0.00 | 0.00 |   |
| BP | 0048 positive regulation of receptor-mediated endocytosis | 4/292  | 233 | 676  | 692  | 4 |
|    | 260                                                       |        | 28  | 836  | 701  |   |
|    | GO:                                                       |        | 176 | 0.00 | 0.00 |   |
| BP | 2001 regulation of cation channel activity                | 7/292  | /23 | 686  | 701  | 7 |
|    | 257                                                       |        | 328 | 128  | 822  |   |
|    | GO:                                                       |        | 95/ | 0.00 | 0.00 |   |
| BP | 0007 integrin-mediated signaling pathway                  | 5/292  | 233 | 688  | 703  | 5 |
|    | 229                                                       |        | 28  | 497  | 465  |   |
|    | GO:                                                       |        | 95/ | 0.00 | 0.00 |   |
| BP | 0021 central nervous system neuron development            | 5/292  | 233 | 688  | 703  | 5 |
|    | 954                                                       |        | 28  | 497  | 465  |   |
|    | GO:                                                       |        | 177 | 0.00 | 0.00 |   |
| BP | 0035 cardiocyte differentiation                           | 7/292  | /23 | 706  | 721  | 7 |
|    | 051                                                       |        | 328 | 956  | 926  |   |
|    | GO:                                                       |        | 135 | 0.00 | 0.00 |   |
| BP | 0030 positive regulation of Wnt signaling pathway         | 6/292  | /23 | 715  | 729  | 6 |
|    | 177                                                       |        | 328 | 204  | 945  |   |
|    | GO:                                                       |        | 61/ | 0.00 | 0.00 |   |
| BP | 0002 natural killer cell mediated immunity                | 4/292  | 233 | 717  | 731  | 4 |
|    | 228                                                       |        | 28  | 341  | 721  |   |
|    | GO:                                                       |        | 370 | 0.00 | 0.00 |   |
| BP | 1902 regulation of supramolecular fiber organization      | 11/292 | /23 | 725  | 739  | 1 |
|    | 903                                                       |        | 328 | 156  | 284  | 1 |
|    | GO:                                                       |        | 32/ | 0.00 | 0.00 |   |
| BP | 0001 maternal placenta development                        | 3/292  | 233 | 736  | 748  | 3 |
|    | 893                                                       |        | 28  | 197  | 472  |   |
|    | GO:                                                       |        | 32/ | 0.00 | 0.00 |   |
| BP | 0008 bile acid metabolic process                          | 3/292  | 233 | 736  | 748  | 3 |
|    | 206                                                       |        | 28  | 197  | 472  |   |
|    | GO:                                                       |        | 32/ | 0.00 | 0.00 |   |
| BP | 0032 regulation of interleukin-4 production               | 3/292  | 233 | 736  | 748  | 3 |
|    | 673                                                       |        | 28  | 197  | 472  |   |

|    |                                                                 |        |     |      |      |   |  |
|----|-----------------------------------------------------------------|--------|-----|------|------|---|--|
|    | GO:                                                             |        | 32/ | 0.00 | 0.00 |   |  |
| BP | 0048 collateral sprouting                                       | 3/292  | 233 | 736  | 748  | 3 |  |
|    | 668                                                             |        | 28  | 197  | 472  |   |  |
|    | GO:                                                             |        | 32/ | 0.00 | 0.00 |   |  |
| BP | 0060 coronary vasculature morphogenesis                         | 3/292  | 233 | 736  | 748  | 3 |  |
|    | 977                                                             |        | 28  | 197  | 472  |   |  |
|    | GO:                                                             |        | 271 | 0.00 | 0.00 |   |  |
| BP | 0051 regulation of small GTPase mediated signal transduction    | 9/292  | /23 | 738  | 750  | 9 |  |
|    | 056                                                             |        | 328 | 549  | 45   |   |  |
|    | GO:                                                             |        | 97/ | 0.00 | 0.00 |   |  |
| BP | 0045 regulation of viral genome replication                     | 5/292  | 233 | 750  | 762  | 5 |  |
|    | 069                                                             |        | 28  | 584  | 26   |   |  |
|    | GO:                                                             |        | 478 | 0.00 | 0.00 |   |  |
| BP | 0007 pattern specification process                              | 13/292 | /23 | 757  | 769  | 1 |  |
|    | 389                                                             |        | 328 | 673  | 035  | 3 |  |
|    | GO:                                                             |        | 62/ | 0.00 | 0.00 |   |  |
| BP | 0031 endocrine pancreas development                             | 4/292  | 233 | 759  | 770  | 4 |  |
|    | 018                                                             |        | 28  | 414  | 379  |   |  |
|    | GO:                                                             |        | 225 | 0.00 | 0.00 |   |  |
| BP | 0051 positive regulation of cytoskeleton organization           | 8/292  | /23 | 764  | 775  | 8 |  |
|    | 495                                                             |        | 328 | 529  | 142  |   |  |
|    | GO:                                                             |        | 426 | 0.00 | 0.00 |   |  |
| BP | 0034 cell junction assembly                                     | 12/292 | /23 | 777  | 787  | 1 |  |
|    | 329                                                             |        | 328 | 595  | 956  | 2 |  |
|    | GO:                                                             |        | 323 | 0.00 | 0.00 |   |  |
| BP | 0006 alcohol metabolic process                                  | 10/292 | /23 | 783  | 793  | 1 |  |
|    | 066                                                             |        | 328 | 04   | 038  | 0 |  |
|    | GO:                                                             |        | 138 | 0.00 | 0.00 |   |  |
| BP | 0042 ear morphogenesis                                          | 6/292  | /23 | 793  | 800  | 6 |  |
|    | 471                                                             |        | 328 | 238  | 669  |   |  |
|    | GO:                                                             |        | 138 | 0.00 | 0.00 |   |  |
| BP | 0046 alcohol biosynthetic process                               | 6/292  | /23 | 793  | 800  | 6 |  |
|    | 165                                                             |        | 328 | 238  | 669  |   |  |
|    | GO:                                                             |        | 11/ | 0.00 | 0.00 |   |  |
| BP | 0002 aggressive behavior                                        | 2/292  | 233 | 797  | 800  | 2 |  |
|    | 118                                                             |        | 28  | 084  | 669  |   |  |
|    | GO:                                                             |        | 11/ | 0.00 | 0.00 |   |  |
| BP | 0002 dendritic cell antigen processing and presentation         | 2/292  | 233 | 797  | 800  | 2 |  |
|    | 468                                                             |        | 28  | 084  | 669  |   |  |
|    | GO:                                                             |        | 11/ | 0.00 | 0.00 |   |  |
| BP | 0002 positive regulation of antigen processing and presentation | 2/292  | 233 | 797  | 800  | 2 |  |
|    | 579                                                             |        | 28  | 084  | 669  |   |  |

|    |      |                                                         |       |      |      |       |
|----|------|---------------------------------------------------------|-------|------|------|-------|
|    | GO:  |                                                         | 11/   | 0.00 | 0.00 |       |
| BP | 0021 | trigeminal nerve development                            | 2/292 | 233  | 797  | 800 2 |
|    | 559  |                                                         |       | 28   | 084  | 669   |
|    | GO:  |                                                         |       | 11/  | 0.00 | 0.00  |
| BP | 0031 | regulation of glucocorticoid metabolic process          | 2/292 | 233  | 797  | 800 2 |
|    | 943  |                                                         |       | 28   | 084  | 669   |
|    | GO:  |                                                         |       | 11/  | 0.00 | 0.00  |
| BP | 0060 | Bergmann glial cell differentiation                     | 2/292 | 233  | 797  | 800 2 |
|    | 020  |                                                         |       | 28   | 084  | 669   |
|    | GO:  |                                                         |       | 11/  | 0.00 | 0.00  |
| BP | 0060 | limb bud formation                                      | 2/292 | 233  | 797  | 800 2 |
|    | 174  |                                                         |       | 28   | 084  | 669   |
|    | GO:  |                                                         |       | 11/  | 0.00 | 0.00  |
| BP | 0060 | regulation of penile erection                           | 2/292 | 233  | 797  | 800 2 |
|    | 405  |                                                         |       | 28   | 084  | 669   |
|    | GO:  |                                                         |       | 11/  | 0.00 | 0.00  |
| BP | 0060 | dichotomous subdivision of an epithelial terminal unit  | 2/292 | 233  | 797  | 800 2 |
|    | 600  |                                                         |       | 28   | 084  | 669   |
|    | GO:  |                                                         |       | 11/  | 0.00 | 0.00  |
| BP | 0090 | positive regulation of protein kinase C signaling       | 2/292 | 233  | 797  | 800 2 |
|    | 037  |                                                         |       | 28   | 084  | 669   |
|    | GO:  |                                                         |       | 11/  | 0.00 | 0.00  |
| BP | 0097 | vascular associated smooth muscle cell development      | 2/292 | 233  | 797  | 800 2 |
|    | 084  |                                                         |       | 28   | 084  | 669   |
|    | GO:  |                                                         |       | 11/  | 0.00 | 0.00  |
| BP | 2000 | regulation of glucocorticoid receptor signaling pathway | 2/292 | 233  | 797  | 800 2 |
|    | 322  |                                                         |       | 28   | 084  | 669   |
|    | GO:  |                                                         |       | 11/  | 0.00 | 0.00  |
| BP | 2000 | regulation of glucocorticoid secretion                  | 2/292 | 233  | 797  | 800 2 |
|    | 849  |                                                         |       | 28   | 084  | 669   |
|    | GO:  |                                                         |       | 33/  | 0.00 | 0.00  |
| BP | 0045 | regulatory T cell differentiation                       | 3/292 | 233  | 802  | 804 3 |
|    | 066  |                                                         |       | 28   | 425  | 72    |
|    | GO:  |                                                         |       | 33/  | 0.00 | 0.00  |
| BP | 0051 | negative regulation of oxidoreductase activity          | 3/292 | 233  | 802  | 804 3 |
|    | 354  |                                                         |       | 28   | 425  | 72    |
|    | GO:  |                                                         |       | 33/  | 0.00 | 0.00  |
| BP | 1903 | regulation of hydrogen peroxide-induced cell death      | 3/292 | 233  | 802  | 804 3 |
|    | 205  |                                                         |       | 28   | 425  | 72    |
|    | GO:  |                                                         |       | 99/  | 0.00 | 0.00  |
| BP | 0030 | natural killer cell activation                          | 5/292 | 233  | 816  | 817 5 |
|    | 101  |                                                         |       | 28   | 469  | 915   |



|    |                                                        |       |     |      |      |   |
|----|--------------------------------------------------------|-------|-----|------|------|---|
|    | GO:                                                    |       | 99/ | 0.00 | 0.00 |   |
| BP | 0043 regulation of muscle adaptation                   | 5/292 | 233 | 816  | 817  | 5 |
|    | 502                                                    |       | 28  | 469  | 915  |   |
|    | GO:                                                    |       | 64/ | 0.00 | 0.00 |   |
| BP | 0006 cellular iron ion homeostasis                     | 4/292 | 233 | 848  | 848  | 4 |
|    | 879                                                    |       | 28  | 36   | 021  |   |
|    | GO:                                                    |       | 64/ | 0.00 | 0.00 |   |
| BP | 0045 negative regulation of osteoblast differentiation | 4/292 | 233 | 848  | 848  | 4 |
|    | 668                                                    |       | 28  | 36   | 021  |   |
|    | GO:                                                    |       | 64/ | 0.00 | 0.00 |   |
| BP | 0090 negative regulation of peptide hormone secretion  | 4/292 | 233 | 848  | 848  | 4 |
|    | 278                                                    |       | 28  | 36   | 021  |   |
|    | GO:                                                    |       | 64/ | 0.00 | 0.00 |   |
| BP | 1903 mucopolysaccharide metabolic process              | 4/292 | 233 | 848  | 848  | 4 |
|    | 510                                                    |       | 28  | 36   | 021  |   |
|    | GO:                                                    |       | 100 | 0.00 | 0.00 |   |
| BP | 0050 regulation of behavior                            | 5/292 | /23 | 850  | 850  | 5 |
|    | 795                                                    |       | 328 | 87   | 07   |   |
|    | GO:                                                    |       | 184 | 0.00 | 0.00 |   |
| BP | 0030 adult behavior                                    | 7/292 | /23 | 866  | 864  | 7 |
|    | 534                                                    |       | 328 | 128  | 377  |   |
|    | GO:                                                    |       | 184 | 0.00 | 0.00 |   |
| BP | 0032 positive regulation of intracellular transport    | 7/292 | /23 | 866  | 864  | 7 |
|    | 388                                                    |       | 328 | 128  | 377  |   |
|    | GO:                                                    |       | 34/ | 0.00 | 0.00 |   |
| BP | 0003 endocardial cushion morphogenesis                 | 3/292 | 233 | 872  | 868  | 3 |
|    | 203                                                    |       | 28  | 051  | 878  |   |
|    | GO:                                                    |       | 34/ | 0.00 | 0.00 |   |
| BP | 0003 regulation of cilium movement                     | 3/292 | 233 | 872  | 868  | 3 |
|    | 352                                                    |       | 28  | 051  | 878  |   |
|    | GO:                                                    |       | 34/ | 0.00 | 0.00 |   |
| BP | 0098 bone growth                                       | 3/292 | 233 | 872  | 868  | 3 |
|    | 868                                                    |       | 28  | 051  | 878  |   |
|    | GO:                                                    |       | 65/ | 0.00 | 0.00 |   |
| BP | 0015 L-amino acid transport                            | 4/292 | 233 | 895  | 891  | 4 |
|    | 807                                                    |       | 28  | 28   | 542  |   |
|    | GO:                                                    |       | 280 | 0.00 | 0.00 |   |
| BP | 0071 cellular response to external stimulus            | 9/292 | /23 | 904  | 899  | 9 |
|    | 496                                                    |       | 328 | 172  | 911  |   |
|    | GO:                                                    |       | 102 | 0.00 | 0.00 |   |
| BP | 0001 formation of primary germ layer                   | 5/292 | /23 | 922  | 917  | 5 |
|    | 704                                                    |       | 328 | 657  | 319  |   |

|    |                                                                                 |        |     |      |      |   |
|----|---------------------------------------------------------------------------------|--------|-----|------|------|---|
|    | GO:                                                                             |        | 102 | 0.00 | 0.00 |   |
| BP | 0050 regulation of calcium-mediated signaling                                   | 5/292  | /23 | 922  | 917  | 5 |
|    | 848                                                                             |        | 328 | 657  | 319  |   |
|    | GO:                                                                             |        | 383 | 0.00 | 0.00 |   |
| BP | 0022 cellular component disassembly                                             | 11/292 | /23 | 925  | 919  | 1 |
|    | 411                                                                             |        | 328 | 742  | 891  | 1 |
|    | GO:                                                                             |        | 437 | 0.00 | 0.00 |   |
| BP | 0007 actin filament organization                                                | 12/292 | /23 | 940  | 928  | 1 |
|    | 015                                                                             |        | 328 | 448  | 155  | 2 |
|    | GO:                                                                             |        | 66/ | 0.00 | 0.00 |   |
| BP | 0001 mesoderm formation                                                         | 4/292  | 233 | 943  | 928  | 4 |
|    | 707                                                                             |        | 28  | 86   | 155  |   |
|    | GO:                                                                             |        | 35/ | 0.00 | 0.00 |   |
| BP | 0010 regulation of keratinocyte proliferation                                   | 3/292  | 233 | 945  | 928  | 3 |
|    | 837                                                                             |        | 28  | 11   | 155  |   |
|    | GO:                                                                             |        | 35/ | 0.00 | 0.00 |   |
| BP | 0034 regulation of homotypic cell-cell adhesion                                 | 3/292  | 233 | 945  | 928  | 3 |
|    | 110                                                                             |        | 28  | 11   | 155  |   |
|    | GO:                                                                             |        | 35/ | 0.00 | 0.00 |   |
| BP | 0043 positive regulation of protein-containing complex disassembly              | 3/292  | 233 | 945  | 928  | 3 |
|    | 243                                                                             |        | 28  | 11   | 155  |   |
|    | GO:                                                                             |        | 35/ | 0.00 | 0.00 |   |
| BP | 0050 negative regulation of B cell activation                                   | 3/292  | 233 | 945  | 928  | 3 |
|    | 869                                                                             |        | 28  | 11   | 155  |   |
|    | GO:                                                                             |        | 35/ | 0.00 | 0.00 |   |
| BP | 0055 monovalent inorganic anion homeostasis                                     | 3/292  | 233 | 945  | 928  | 3 |
|    | 083                                                                             |        | 28  | 11   | 155  |   |
|    | GO:                                                                             |        | 35/ | 0.00 | 0.00 |   |
| BP | 0060 epithelial tube branching involved in lung morphogenesis                   | 3/292  | 233 | 945  | 928  | 3 |
|    | 441                                                                             |        | 28  | 11   | 155  |   |
|    | GO:                                                                             |        | 35/ | 0.00 | 0.00 |   |
| BP | 1903 regulation of oxidative stress-induced neuron death                        | 3/292  | 233 | 945  | 928  | 3 |
|    | 203                                                                             |        | 28  | 11   | 155  |   |
|    | GO:                                                                             |        | 12/ | 0.00 | 0.00 |   |
| BP | 0003 mesenchymal to epithelial transition involved in metanephros morphogenesis | 2/292  | 233 | 948  | 928  | 2 |
|    | 337                                                                             |        | 28  | 645  | 155  |   |
|    | GO:                                                                             |        | 12/ | 0.00 | 0.00 |   |
| BP | 0010 negative regulation of heart rate                                          | 2/292  | 233 | 948  | 928  | 2 |
|    | 459                                                                             |        | 28  | 645  | 155  |   |
|    | GO:                                                                             |        | 12/ | 0.00 | 0.00 |   |
| BP | 0016 gap junction assembly                                                      | 2/292  | 233 | 948  | 928  | 2 |
|    | 264                                                                             |        | 28  | 645  | 155  |   |

|    |                                                                                           |       |     |      |      |   |
|----|-------------------------------------------------------------------------------------------|-------|-----|------|------|---|
|    | GO:                                                                                       |       | 12/ | 0.00 | 0.00 |   |
| BP | 0021 facial nerve development                                                             | 2/292 | 233 | 948  | 928  | 2 |
|    | 561                                                                                       |       | 28  | 645  | 155  |   |
|    | GO:                                                                                       |       | 12/ | 0.00 | 0.00 |   |
| BP | 0021 facial nerve morphogenesis                                                           | 2/292 | 233 | 948  | 928  | 2 |
|    | 610                                                                                       |       | 28  | 645  | 155  |   |
|    | GO:                                                                                       |       | 12/ | 0.00 | 0.00 |   |
| BP | 0030 positive regulation of vascular endothelial growth factor receptor signaling pathway | 2/292 | 233 | 948  | 928  | 2 |
|    | 949                                                                                       |       | 28  | 645  | 155  |   |
|    | GO: positive regulation of granulocyte                                                    |       | 12/ | 0.00 | 0.00 |   |
| BP | 0032 macrophage colony-stimulating factor                                                 | 2/292 | 233 | 948  | 928  | 2 |
|    | 725 production                                                                            |       | 28  | 645  | 155  |   |
|    | GO:                                                                                       |       | 12/ | 0.00 | 0.00 |   |
| BP | 0035 glucocorticoid secretion                                                             | 2/292 | 233 | 948  | 928  | 2 |
|    | 933                                                                                       |       | 28  | 645  | 155  |   |
|    | GO:                                                                                       |       | 12/ | 0.00 | 0.00 |   |
| BP | 0045 regulation of T-helper 1 cell differentiation                                        | 2/292 | 233 | 948  | 928  | 2 |
|    | 625                                                                                       |       | 28  | 645  | 155  |   |
|    | GO:                                                                                       |       | 12/ | 0.00 | 0.00 |   |
| BP | 0051 positive regulation of immunoglobulin secretion                                      | 2/292 | 233 | 948  | 928  | 2 |
|    | 024                                                                                       |       | 28  | 645  | 155  |   |
|    | GO:                                                                                       |       | 12/ | 0.00 | 0.00 |   |
| BP | 0051 NK T cell activation                                                                 | 2/292 | 233 | 948  | 928  | 2 |
|    | 132                                                                                       |       | 28  | 645  | 155  |   |
|    | GO:                                                                                       |       | 12/ | 0.00 | 0.00 |   |
| BP | 0051 negative regulation of release of sequestered calcium ion into cytosol               | 2/292 | 233 | 948  | 928  | 2 |
|    | 280                                                                                       |       | 28  | 645  | 155  |   |
|    | GO:                                                                                       |       | 12/ | 0.00 | 0.00 |   |
| BP | 0060 vagina development                                                                   | 2/292 | 233 | 948  | 928  | 2 |
|    | 068                                                                                       |       | 28  | 645  | 155  |   |
|    | GO:                                                                                       |       | 12/ | 0.00 | 0.00 |   |
| BP | 0060 lung saccule development                                                             | 2/292 | 233 | 948  | 928  | 2 |
|    | 430                                                                                       |       | 28  | 645  | 155  |   |
|    | GO:                                                                                       |       | 12/ | 0.00 | 0.00 |   |
| BP | 0060 semicircular canal development                                                       | 2/292 | 233 | 948  | 928  | 2 |
|    | 872                                                                                       |       | 28  | 645  | 155  |   |
|    | GO:                                                                                       |       | 12/ | 0.00 | 0.00 |   |
| BP | 0070 neutrophil-mediated killing of symbiont cell                                         | 2/292 | 233 | 948  | 928  | 2 |
|    | 943                                                                                       |       | 28  | 645  | 155  |   |
|    | GO:                                                                                       |       | 12/ | 0.00 | 0.00 |   |
| BP | 0097 connective tissue replacement                                                        | 2/292 | 233 | 948  | 928  | 2 |
|    | 709                                                                                       |       | 28  | 645  | 155  |   |

|    |                                                   |       |     |      |      |   |
|----|---------------------------------------------------|-------|-----|------|------|---|
|    | GO:                                               |       | 12/ | 0.00 | 0.00 |   |
| BP | 1902 regulation of tau-protein kinase activity    | 2/292 | 233 | 948  | 928  | 2 |
|    | 947                                               |       | 28  | 645  | 155  |   |
|    | GO:                                               |       | 12/ | 0.00 | 0.00 |   |
| BP | 1903 positive regulation of production of miRNAs  | 2/292 | 233 | 948  | 928  | 2 |
|    | 800 involved in gene silencing by miRNA           |       | 28  | 645  | 155  |   |
|    | GO:                                               |       | 12/ | 0.00 | 0.00 |   |
| BP | 2000 positive regulation of chemokine (C-X-C      | 2/292 | 233 | 948  | 928  | 2 |
|    | 343 motif) ligand 2 production                    |       | 28  | 645  | 155  |   |
|    | GO:                                               |       | 103 | 0.00 | 0.00 |   |
| BP | 0003 cardiac muscle hypertrophy                   | 5/292 | /23 | 960  | 938  | 5 |
|    | 300                                               |       | 328 | 07   | 835  |   |
|    | GO:                                               |       | 144 | 0.00 | 0.00 |   |
| BP | 0010 positive regulation of autophagy             | 6/292 | /23 | 967  | 945  | 6 |
|    | 508                                               |       | 328 | 392  | 495  |   |
|    | GO:                                               |       | 104 | 0.00 | 0.00 |   |
| BP | 0034 negative regulation of ion transmembrane     | 5/292 | /23 | 998  | 975  | 5 |
|    | 766 transport                                     |       | 328 | 514  | 395  |   |
|    | GO:                                               |       | 36/ | 0.01 | 0.00 |   |
| BP | 0008 motor neuron axon guidance                   | 3/292 | 233 | 021  | 994  | 3 |
|    | 045                                               |       | 28  | 636  | 822  |   |
|    | GO:                                               |       | 36/ | 0.01 | 0.00 |   |
| BP | 0010 regulation of cell fate commitment           | 3/292 | 233 | 021  | 994  | 3 |
|    | 453                                               |       | 28  | 636  | 822  |   |
|    | GO:                                               |       | 36/ | 0.01 | 0.00 |   |
| BP | 0036 neuron death in response to oxidative stress | 3/292 | 233 | 021  | 994  | 3 |
|    | 475                                               |       | 28  | 636  | 822  |   |
|    | GO:                                               |       | 36/ | 0.01 | 0.00 |   |
| BP | 0070 lens fiber cell differentiation              | 3/292 | 233 | 021  | 994  | 3 |
|    | 306                                               |       | 28  | 636  | 822  |   |
|    | GO:                                               |       | 36/ | 0.01 | 0.00 |   |
| BP | 0097 amyloid-beta clearance                       | 3/292 | 233 | 021  | 994  | 3 |
|    | 242                                               |       | 28  | 636  | 822  |   |
|    | GO:                                               |       | 36/ | 0.01 | 0.00 |   |
| BP | 2000 regulation of fatty acid transport           | 3/292 | 233 | 021  | 994  | 3 |
|    | 191                                               |       | 28  | 636  | 822  |   |
|    | GO:                                               |       | 69/ | 0.01 | 0.01 |   |
| BP | 0016 positive regulation of macroautophagy        | 4/292 | 233 | 099  | 065  | 4 |
|    | 239                                               |       | 28  | 788  | 318  |   |
|    | GO:                                               |       | 69/ | 0.01 | 0.01 |   |
| BP | 0034 protein localization to cell surface         | 4/292 | 233 | 099  | 065  | 4 |
|    | 394                                               |       | 28  | 788  | 318  |   |

|    |                                                                                                                                           |       |     |      |      |   |
|----|-------------------------------------------------------------------------------------------------------------------------------------------|-------|-----|------|------|---|
|    | GO:                                                                                                                                       |       | 69/ | 0.01 | 0.01 |   |
| BP | 0048 response to axon injury                                                                                                              | 4/292 | 233 | 099  | 065  | 4 |
|    | 678                                                                                                                                       |       | 28  | 788  | 318  |   |
|    | GO:                                                                                                                                       |       | 37/ | 0.01 | 0.01 |   |
| BP | 0001 B cell homeostasis                                                                                                                   | 3/292 | 233 | 101  | 065  | 3 |
|    | 782                                                                                                                                       |       | 28  | 659  | 318  |   |
|    | GO:                                                                                                                                       |       | 37/ | 0.01 | 0.01 |   |
| BP | 0036 cell death in response to hydrogen peroxide                                                                                          | 3/292 | 233 | 101  | 065  | 3 |
|    | 474                                                                                                                                       |       | 28  | 659  | 318  |   |
|    | GO:                                                                                                                                       |       | 37/ | 0.01 | 0.01 |   |
| BP | 0040 regulation of meiotic nuclear division                                                                                               | 3/292 | 233 | 101  | 065  | 3 |
|    | 020                                                                                                                                       |       | 28  | 659  | 318  |   |
|    | GO: positive regulation of cytosolic calcium ion concentration involved in phospholipase C-activating G protein-coupled signaling pathway | 3/292 | 37/ | 0.01 | 0.01 |   |
| BP | 0051                                                                                                                                      |       | 233 | 101  | 065  | 3 |
|    | 482                                                                                                                                       |       | 28  | 659  | 318  |   |
|    | GO: regulation of intrinsic apoptotic signaling pathway in response to DNA damage                                                         | 3/292 | 37/ | 0.01 | 0.01 |   |
| BP | 1902                                                                                                                                      |       | 233 | 101  | 065  | 3 |
|    | 229                                                                                                                                       |       | 28  | 659  | 318  |   |
|    | GO:                                                                                                                                       |       | 240 | 0.01 | 0.01 |   |
| BP | 0046 regulation of Ras protein signal transduction                                                                                        | 8/292 | /23 | 102  | 065  | 8 |
|    | 578                                                                                                                                       |       | 328 | 278  | 318  |   |
|    | GO:                                                                                                                                       |       | 13/ | 0.01 | 0.01 |   |
| BP | 0001 luteinization                                                                                                                        | 2/292 | 233 | 111  | 065  | 2 |
|    | 553                                                                                                                                       |       | 28  | 929  | 318  |   |
|    | GO:                                                                                                                                       |       | 13/ | 0.01 | 0.01 |   |
| BP | 0007 insemination                                                                                                                         | 2/292 | 233 | 111  | 065  | 2 |
|    | 320                                                                                                                                       |       | 28  | 929  | 318  |   |
|    | GO:                                                                                                                                       |       | 13/ | 0.01 | 0.01 |   |
| BP | 0021 cranial nerve structural organization                                                                                                | 2/292 | 233 | 111  | 065  | 2 |
|    | 604                                                                                                                                       |       | 28  | 929  | 318  |   |
|    | GO: negative regulation of protein autophosphorylation                                                                                    | 2/292 | 13/ | 0.01 | 0.01 |   |
| BP | 0031                                                                                                                                      |       | 233 | 111  | 065  | 2 |
|    | 953                                                                                                                                       |       | 28  | 929  | 318  |   |
|    | GO:                                                                                                                                       |       | 13/ | 0.01 | 0.01 |   |
| BP | 0035 positive regulation of urine volume                                                                                                  | 2/292 | 233 | 111  | 065  | 2 |
|    | 810                                                                                                                                       |       | 28  | 929  | 318  |   |
|    | GO:                                                                                                                                       |       | 13/ | 0.01 | 0.01 |   |
| BP | 0045 regulation of T-helper 2 cell differentiation                                                                                        | 2/292 | 233 | 111  | 065  | 2 |
|    | 628                                                                                                                                       |       | 28  | 929  | 318  |   |
|    | GO:                                                                                                                                       |       | 13/ | 0.01 | 0.01 |   |
| BP | 0045 negative regulation of vasoconstriction                                                                                              | 2/292 | 233 | 111  | 065  | 2 |
|    | 906                                                                                                                                       |       | 28  | 929  | 318  |   |

|    |      |                                                          |       |     |      |      |   |
|----|------|----------------------------------------------------------|-------|-----|------|------|---|
|    | GO:  |                                                          |       | 13/ | 0.01 | 0.01 |   |
| BP | 0048 | hepatocyte growth factor receptor signaling pathway      | 2/292 | 233 | 111  | 065  | 2 |
|    | 012  |                                                          |       | 28  | 929  | 318  |   |
|    | GO:  |                                                          |       | 13/ | 0.01 | 0.01 |   |
| BP | 0048 | positive regulation of isotype switching to IgG isotypes | 2/292 | 233 | 111  | 065  | 2 |
|    | 304  |                                                          |       | 28  | 929  | 318  |   |
|    | GO:  |                                                          |       | 13/ | 0.01 | 0.01 |   |
| BP | 0051 | positive regulation of keratinocyte migration            | 2/292 | 233 | 111  | 065  | 2 |
|    | 549  |                                                          |       | 28  | 929  | 318  |   |
|    | GO:  |                                                          |       | 13/ | 0.01 | 0.01 |   |
| BP | 0055 | phosphate ion homeostasis                                | 2/292 | 233 | 111  | 065  | 2 |
|    | 062  |                                                          |       | 28  | 929  | 318  |   |
|    | GO:  |                                                          |       | 13/ | 0.01 | 0.01 |   |
| BP | 0060 | lateral sprouting from an epithelium                     | 2/292 | 233 | 111  | 065  | 2 |
|    | 601  |                                                          |       | 28  | 929  | 318  |   |
|    | GO:  |                                                          |       | 13/ | 0.01 | 0.01 |   |
| BP | 0070 | glucagon secretion                                       | 2/292 | 233 | 111  | 065  | 2 |
|    | 091  |                                                          |       | 28  | 929  | 318  |   |
|    | GO:  |                                                          |       | 13/ | 0.01 | 0.01 |   |
| BP | 0070 | regulation of glucagon secretion                         | 2/292 | 233 | 111  | 065  | 2 |
|    | 092  |                                                          |       | 28  | 929  | 318  |   |
|    | GO:  |                                                          |       | 13/ | 0.01 | 0.01 |   |
| BP | 0070 | uterine smooth muscle contraction                        | 2/292 | 233 | 111  | 065  | 2 |
|    | 471  |                                                          |       | 28  | 929  | 318  |   |
|    | GO:  |                                                          |       | 13/ | 0.01 | 0.01 |   |
| BP | 0071 | commissural neuron axon guidance                         | 2/292 | 233 | 111  | 065  | 2 |
|    | 679  |                                                          |       | 28  | 929  | 318  |   |
|    | GO:  |                                                          |       | 13/ | 0.01 | 0.01 |   |
| BP | 0072 | divalent inorganic anion homeostasis                     | 2/292 | 233 | 111  | 065  | 2 |
|    | 505  |                                                          |       | 28  | 929  | 318  |   |
|    | GO:  |                                                          |       | 13/ | 0.01 | 0.01 |   |
| BP | 0072 | trivalent inorganic anion homeostasis                    | 2/292 | 233 | 111  | 065  | 2 |
|    | 506  |                                                          |       | 28  | 929  | 318  |   |
|    | GO:  |                                                          |       | 13/ | 0.01 | 0.01 |   |
| BP | 0072 | T-helper 17 cell lineage commitment                      | 2/292 | 233 | 111  | 065  | 2 |
|    | 540  |                                                          |       | 28  | 929  | 318  |   |
|    | GO:  |                                                          |       | 13/ | 0.01 | 0.01 |   |
| BP | 1904 | regulation of bile acid metabolic process                | 2/292 | 233 | 111  | 065  | 2 |
|    | 251  |                                                          |       | 28  | 929  | 318  |   |
|    | GO:  |                                                          |       | 13/ | 0.01 | 0.01 |   |
| BP | 2000 | regulation of type B pancreatic cell apoptotic process   | 2/292 | 233 | 111  | 065  | 2 |
|    | 674  |                                                          |       | 28  | 929  | 318  |   |

|    |                                                                  |       |     |      |      |   |
|----|------------------------------------------------------------------|-------|-----|------|------|---|
|    | GO:                                                              |       | 13/ | 0.01 | 0.01 |   |
| BP | 2001 negative regulation of neuron migration                     | 2/292 | 233 | 111  | 065  | 2 |
|    | 223                                                              |       | 28  | 929  | 318  |   |
|    | GO:                                                              |       | 107 | 0.01 | 0.01 |   |
| BP | 0000 regulation of DNA recombination                             | 5/292 | /23 | 120  | 072  | 5 |
|    | 018                                                              |       | 328 | 158  | 088  |   |
|    | GO:                                                              |       | 107 | 0.01 | 0.01 |   |
| BP | 0014 striated muscle hypertrophy                                 | 5/292 | /23 | 120  | 072  | 5 |
|    | 897                                                              |       | 328 | 158  | 088  |   |
|    | GO:                                                              |       | 70/ | 0.01 | 0.01 |   |
| BP | 0032 circadian regulation of gene expression                     | 4/292 | 233 | 155  | 104  | 4 |
|    | 922                                                              |       | 28  | 227  | 507  |   |
|    | GO:                                                              |       | 70/ | 0.01 | 0.01 |   |
| BP | 0048 mesoderm morphogenesis                                      | 4/292 | 233 | 155  | 104  | 4 |
|    | 332                                                              |       | 28  | 227  | 507  |   |
|    | GO:                                                              |       | 150 | 0.01 | 0.01 |   |
| BP | 0002 columnar/cuboidal epithelial cell differentiation           | 6/292 | /23 | 167  | 115  | 6 |
|    | 065                                                              |       | 328 | 222  | 397  |   |
|    | GO:                                                              |       | 38/ | 0.01 | 0.01 |   |
| BP | 0010 regulation of platelet activation                           | 3/292 | 233 | 185  | 129  | 3 |
|    | 543                                                              |       | 28  | 204  | 072  |   |
|    | GO:                                                              |       | 38/ | 0.01 | 0.01 |   |
| BP | 0032 regulation of synaptic transmission, GABAergic              | 3/292 | 233 | 185  | 129  | 3 |
|    | 228                                                              |       | 28  | 204  | 072  |   |
|    | GO:                                                              |       | 38/ | 0.01 | 0.01 |   |
| BP | 0043 regulation of mast cell degranulation                       | 3/292 | 233 | 185  | 129  | 3 |
|    | 304                                                              |       | 28  | 204  | 072  |   |
|    | GO:                                                              |       | 38/ | 0.01 | 0.01 |   |
| BP | 0046 negative regulation of insulin receptor signaling pathway   | 3/292 | 233 | 185  | 129  | 3 |
|    | 627                                                              |       | 28  | 204  | 072  |   |
|    | GO:                                                              |       | 38/ | 0.01 | 0.01 |   |
| BP | 0051 positive regulation of synaptic transmission, glutamatergic | 3/292 | 233 | 185  | 129  | 3 |
|    | 968                                                              |       | 28  | 204  | 072  |   |
|    | GO:                                                              |       | 38/ | 0.01 | 0.01 |   |
| BP | 0072 metanephric nephron development                             | 3/292 | 233 | 185  | 129  | 3 |
|    | 210                                                              |       | 28  | 204  | 072  |   |
|    | GO:                                                              |       | 109 | 0.01 | 0.01 |   |
| BP | 0014 muscle hypertrophy                                          | 5/292 | /23 | 206  | 148  | 5 |
|    | 896                                                              |       | 328 | 642  | 902  |   |
|    | GO:                                                              |       | 71/ | 0.01 | 0.01 |   |
| BP | 0055 anion homeostasis                                           | 4/292 | 233 | 212  | 153  | 4 |
|    | 081                                                              |       | 28  | 432  | 82   |   |

|    |                                                                         |        |     |      |      |   |
|----|-------------------------------------------------------------------------|--------|-----|------|------|---|
|    | GO:                                                                     |        | 197 | 0.01 | 0.01 |   |
| BP | 0044 multi-multicellular organism process                               | 7/292  | /23 | 229  | 169  | 7 |
|    | 706                                                                     |        | 328 | 324  | 291  |   |
|    | GO:                                                                     |        | 152 | 0.01 | 0.01 |   |
| BP | 0090 negative regulation of cellular response to growth factor stimulus | 6/292  | /23 | 239  | 178  | 6 |
|    | 288                                                                     |        | 328 | 852  | 699  |   |
|    | GO:                                                                     |        | 400 | 0.01 | 0.01 |   |
| BP | 0006 generation of precursor metabolites and energy                     | 11/292 | /23 | 249  | 187  | 1 |
|    | 091                                                                     |        | 328 | 8    | 544  | 1 |
|    | GO:                                                                     |        | 110 | 0.01 | 0.01 |   |
| BP | 0008 adult locomotory behavior                                          | 5/292  | /23 | 251  | 187  | 5 |
|    | 344                                                                     |        | 328 | 537  | 971  |   |
|    | GO:                                                                     |        | 110 | 0.01 | 0.01 |   |
| BP | 0048 oligodendrocyte differentiation                                    | 5/292  | /23 | 251  | 187  | 5 |
|    | 709                                                                     |        | 328 | 537  | 971  |   |
|    | GO:                                                                     |        | 72/ | 0.01 | 0.01 |   |
| BP | 0010 regulation of cardiac muscle hypertrophy                           | 4/292  | 233 | 271  | 203  | 4 |
|    | 611                                                                     |        | 28  | 421  | 931  |   |
|    | GO:                                                                     |        | 39/ | 0.01 | 0.01 |   |
| BP | 0007 activation of JUN kinase activity                                  | 3/292  | 233 | 272  | 203  | 3 |
|    | 257                                                                     |        | 28  | 296  | 931  |   |
|    | GO:                                                                     |        | 39/ | 0.01 | 0.01 |   |
| BP | 0010 positive regulation of cardiac muscle hypertrophy                  | 3/292  | 233 | 272  | 203  | 3 |
|    | 613                                                                     |        | 28  | 296  | 931  |   |
|    | GO:                                                                     |        | 39/ | 0.01 | 0.01 |   |
| BP | 0033 regulation of mast cell activation involved in immune response     | 3/292  | 233 | 272  | 203  | 3 |
|    | 006                                                                     |        | 28  | 296  | 931  |   |
|    | GO:                                                                     |        | 39/ | 0.01 | 0.01 |   |
| BP | 0035 epithelial cell differentiation involved in kidney development     | 3/292  | 233 | 272  | 203  | 3 |
|    | 850                                                                     |        | 28  | 296  | 931  |   |
|    | GO:                                                                     |        | 39/ | 0.01 | 0.01 |   |
| BP | 0050 intestinal absorption                                              | 3/292  | 233 | 272  | 203  | 3 |
|    | 892                                                                     |        | 28  | 296  | 931  |   |
|    | GO:                                                                     |        | 153 | 0.01 | 0.01 |   |
| BP | 0030 B cell differentiation                                             | 6/292  | /23 | 277  | 203  | 6 |
|    | 183                                                                     |        | 328 | 334  | 931  |   |
|    | GO:                                                                     |        | 14/ | 0.01 | 0.01 |   |
| BP | 0001 NK T cell differentiation                                          | 2/292  | 233 | 286  | 203  | 2 |
|    | 865                                                                     |        | 28  | 619  | 931  |   |
|    | GO:                                                                     |        | 14/ | 0.01 | 0.01 |   |
| BP | 0002 positive regulation of hypersensitivity                            | 2/292  | 233 | 286  | 203  | 2 |
|    | 885                                                                     |        | 28  | 619  | 931  |   |



|    |      |                                                                 |       |      |      |       |
|----|------|-----------------------------------------------------------------|-------|------|------|-------|
|    | GO:  |                                                                 | 14/   | 0.01 | 0.01 |       |
| BP | 0021 | adenohypophysis development                                     | 2/292 | 233  | 286  | 203 2 |
|    | 984  |                                                                 |       | 28   | 619  | 931   |
|    | GO:  |                                                                 | 14/   | 0.01 | 0.01 |       |
| BP | 0030 | hyaluronan biosynthetic process                                 | 2/292 | 233  | 286  | 203 2 |
|    | 213  |                                                                 |       | 28   | 619  | 931   |
|    | GO:  |                                                                 | 14/   | 0.01 | 0.01 |       |
| BP | 0030 | peristalsis                                                     | 2/292 | 233  | 286  | 203 2 |
|    | 432  |                                                                 |       | 28   | 619  | 931   |
|    | GO:  |                                                                 | 14/   | 0.01 | 0.01 |       |
| BP | 0032 | negative regulation of monooxygenase activity                   | 2/292 | 233  | 286  | 203 2 |
|    | 769  |                                                                 |       | 28   | 619  | 931   |
|    | GO:  |                                                                 | 14/   | 0.01 | 0.01 |       |
| BP | 0042 | negative regulation of tyrosine phosphorylation of STAT protein | 2/292 | 233  | 286  | 203 2 |
|    | 532  |                                                                 |       | 28   | 619  | 931   |
|    | GO:  |                                                                 | 14/   | 0.01 | 0.01 |       |
| BP | 0042 | glucocorticoid receptor signaling pathway                       | 2/292 | 233  | 286  | 203 2 |
|    | 921  |                                                                 |       | 28   | 619  | 931   |
|    | GO:  |                                                                 | 14/   | 0.01 | 0.01 |       |
| BP | 0045 | negative thymic T cell selection                                | 2/292 | 233  | 286  | 203 2 |
|    | 060  |                                                                 |       | 28   | 619  | 931   |
|    | GO:  |                                                                 | 14/   | 0.01 | 0.01 |       |
| BP | 0045 | negative regulation of meiotic nuclear division                 | 2/292 | 233  | 286  | 203 2 |
|    | 835  |                                                                 |       | 28   | 619  | 931   |
|    | GO:  |                                                                 | 14/   | 0.01 | 0.01 |       |
| BP | 0046 | negative regulation of alpha-beta T cell proliferation          | 2/292 | 233  | 286  | 203 2 |
|    | 642  |                                                                 |       | 28   | 619  | 931   |
|    | GO:  |                                                                 | 14/   | 0.01 | 0.01 |       |
| BP | 0048 | mucosa-associated lymphoid tissue development                   | 2/292 | 233  | 286  | 203 2 |
|    | 537  |                                                                 |       | 28   | 619  | 931   |
|    | GO:  |                                                                 | 14/   | 0.01 | 0.01 |       |
| BP | 0048 | Peyer's patch development                                       | 2/292 | 233  | 286  | 203 2 |
|    | 541  |                                                                 |       | 28   | 619  | 931   |
|    | GO:  |                                                                 | 14/   | 0.01 | 0.01 |       |
| BP | 0048 | positive regulation of collateral sprouting                     | 2/292 | 233  | 286  | 203 2 |
|    | 672  |                                                                 |       | 28   | 619  | 931   |
|    | GO:  |                                                                 | 14/   | 0.01 | 0.01 |       |
| BP | 0051 | positive regulation of smooth muscle cell differentiation       | 2/292 | 233  | 286  | 203 2 |
|    | 152  |                                                                 |       | 28   | 619  | 931   |
|    | GO:  |                                                                 | 14/   | 0.01 | 0.01 |       |
| BP | 0051 | positive regulation of sequestering of calcium ion              | 2/292 | 233  | 286  | 203 2 |
|    | 284  |                                                                 |       | 28   | 619  | 931   |

|    |                                                                 |        |     |      |      |   |  |
|----|-----------------------------------------------------------------|--------|-----|------|------|---|--|
|    | GO:                                                             |        | 14/ | 0.01 | 0.01 |   |  |
| BP | 0060 prostate gland growth                                      | 2/292  | 233 | 286  | 203  | 2 |  |
|    | 736                                                             |        | 28  | 619  | 931  |   |  |
|    | GO:                                                             |        | 14/ | 0.01 | 0.01 |   |  |
| BP | 0070 neutrophil mediated cytotoxicity                           | 2/292  | 233 | 286  | 203  | 2 |  |
|    | 942                                                             |        | 28  | 619  | 931  |   |  |
|    | GO:                                                             |        | 14/ | 0.01 | 0.01 |   |  |
| BP | 0071 cellular response to cholesterol                           | 2/292  | 233 | 286  | 203  | 2 |  |
|    | 397                                                             |        | 28  | 619  | 931  |   |  |
|    | GO:                                                             |        | 14/ | 0.01 | 0.01 |   |  |
| BP | 0072 T cell extravasation                                       | 2/292  | 233 | 286  | 203  | 2 |  |
|    | 683                                                             |        | 28  | 619  | 931  |   |  |
|    | GO:                                                             |        | 14/ | 0.01 | 0.01 |   |  |
| BP | 0099 trans-synaptic signaling, modulating synaptic transmission | 2/292  | 233 | 286  | 203  | 2 |  |
|    | 550                                                             |        | 28  | 619  | 931  |   |  |
|    | GO:                                                             |        | 299 | 0.01 | 0.01 |   |  |
| BP | 0050 antigen receptor-mediated signaling pathway                | 9/292  | /23 | 344  | 257  | 9 |  |
|    | 851                                                             |        | 328 | 621  | 567  |   |  |
|    | GO:                                                             |        | 351 | 0.01 | 0.01 |   |  |
| BP | 0031 cell-substrate adhesion                                    | 10/292 | /23 | 346  | 258  | 1 |  |
|    | 589                                                             |        | 328 | 213  | 418  | 0 |  |
|    | GO:                                                             |        | 40/ | 0.01 | 0.01 |   |  |
| BP | 0009 response to cold                                           | 3/292  | 233 | 362  | 267  | 3 |  |
|    | 409                                                             |        | 28  | 957  | 648  |   |  |
|    | GO:                                                             |        | 40/ | 0.01 | 0.01 |   |  |
| BP | 0014 positive regulation of muscle hypertrophy                  | 3/292  | 233 | 362  | 267  | 3 |  |
|    | 742                                                             |        | 28  | 957  | 648  |   |  |
|    | GO:                                                             |        | 40/ | 0.01 | 0.01 |   |  |
| BP | 0030 sleep                                                      | 3/292  | 233 | 362  | 267  | 3 |  |
|    | 431                                                             |        | 28  | 957  | 648  |   |  |
|    | GO:                                                             |        | 40/ | 0.01 | 0.01 |   |  |
| BP | 0034 positive regulation of tissue remodeling                   | 3/292  | 233 | 362  | 267  | 3 |  |
|    | 105                                                             |        | 28  | 957  | 648  |   |  |
|    | GO:                                                             |        | 40/ | 0.01 | 0.01 |   |  |
| BP | 0043 positive T cell selection                                  | 3/292  | 233 | 362  | 267  | 3 |  |
|    | 368                                                             |        | 28  | 957  | 648  |   |  |
|    | GO:                                                             |        | 40/ | 0.01 | 0.01 |   |  |
| BP | 0060 regulation of feeding behavior                             | 3/292  | 233 | 362  | 267  | 3 |  |
|    | 259                                                             |        | 28  | 957  | 648  |   |  |
|    | GO:                                                             |        | 40/ | 0.01 | 0.01 |   |  |
| BP | 0070 regulation of neuron projection regeneration               | 3/292  | 233 | 362  | 267  | 3 |  |
|    | 570                                                             |        | 28  | 957  | 648  |   |  |

|    |      |                                                                    |        |      |      |     |   |
|----|------|--------------------------------------------------------------------|--------|------|------|-----|---|
|    | GO:  |                                                                    | 40/    | 0.01 | 0.01 |     |   |
| BP | 0070 | regulation of calcineurin-NFAT signaling cascade                   | 3/292  | 233  | 362  | 267 | 3 |
|    | 884  |                                                                    |        | 28   | 957  | 648 |   |
|    | GO:  |                                                                    | 40/    | 0.01 | 0.01 |     |   |
| BP | 0071 | dopaminergic neuron differentiation                                | 3/292  | 233  | 362  | 267 | 3 |
|    | 542  |                                                                    |        | 28   | 957  | 648 |   |
|    | GO:  |                                                                    | 40/    | 0.01 | 0.01 |     |   |
| BP | 0097 | energy homeostasis                                                 | 3/292  | 233  | 362  | 267 | 3 |
|    | 009  |                                                                    |        | 28   | 957  | 648 |   |
|    | GO:  |                                                                    | 74/    | 0.01 | 0.01 |     |   |
| BP | 0043 | leukocyte degranulation                                            | 4/292  | 233  | 394  | 296 | 4 |
|    | 299  |                                                                    |        | 28   | 824  | 634 |   |
|    | GO:  |                                                                    | 114    | 0.01 | 0.01 |     |   |
| BP | 0007 | mesoderm development                                               | 5/292  | 723  | 442  | 340 | 5 |
|    | 498  |                                                                    |        | 328  | 417  | 201 |   |
|    | GO:  |                                                                    | 355    | 0.01 | 0.01 |     |   |
| BP | 0050 | positive regulation of synaptic transmission                       | 10/292 | 723  | 446  | 343 | 1 |
|    | 806  |                                                                    |        | 328  | 58   | 392 | 0 |
|    | GO:  |                                                                    | 41/    | 0.01 | 0.01 |     |   |
| BP | 0106 | regulation of calcineurin-mediated signaling                       | 3/292  | 233  | 457  | 349 | 3 |
|    | 056  |                                                                    |        | 28   | 205  | 716 |   |
|    | GO:  |                                                                    | 41/    | 0.01 | 0.01 |     |   |
| BP | 1902 | regulation of amyloid precursor protein catabolic process          | 3/292  | 233  | 457  | 349 | 3 |
|    | 991  |                                                                    |        | 28   | 205  | 716 |   |
|    | GO:  |                                                                    | 75/    | 0.01 | 0.01 |     |   |
| BP | 0010 | negative regulation of autophagy                                   | 4/292  | 233  | 459  | 349 | 4 |
|    | 507  |                                                                    |        | 28   | 273  | 716 |   |
|    | GO:  |                                                                    | 75/    | 0.01 | 0.01 |     |   |
| BP | 0014 | regulation of muscle hypertrophy                                   | 4/292  | 233  | 459  | 349 | 4 |
|    | 743  |                                                                    |        | 28   | 273  | 716 |   |
|    | GO:  |                                                                    | 15/    | 0.01 | 0.01 |     |   |
| BP | 0002 | negative regulation of inflammatory response to antigenic stimulus | 2/292  | 233  | 472  | 349 | 2 |
|    | 862  |                                                                    |        | 28   | 407  | 716 |   |
|    | GO:  |                                                                    | 15/    | 0.01 | 0.01 |     |   |
| BP | 0010 | negative regulation of calcium ion transport into cytosol          | 2/292  | 233  | 472  | 349 | 2 |
|    | 523  |                                                                    |        | 28   | 407  | 716 |   |
|    | GO:  |                                                                    | 15/    | 0.01 | 0.01 |     |   |
| BP | 0010 | negative regulation of keratinocyte proliferation                  | 2/292  | 233  | 472  | 349 | 2 |
|    | 839  |                                                                    |        | 28   | 407  | 716 |   |
|    | GO:  |                                                                    | 15/    | 0.01 | 0.01 |     |   |
| BP | 0010 | regulation of amino acid import across plasma membrane             | 2/292  | 233  | 472  | 349 | 2 |
|    | 958  |                                                                    |        | 28   | 407  | 716 |   |

|    |                                                                |       |     |      |      |   |
|----|----------------------------------------------------------------|-------|-----|------|------|---|
|    | GO:                                                            |       | 15/ | 0.01 | 0.01 |   |
| BP | 0010 magnesium ion homeostasis                                 | 2/292 | 233 | 472  | 349  | 2 |
|    | 960                                                            |       | 28  | 407  | 716  |   |
|    | GO:                                                            |       | 15/ | 0.01 | 0.01 |   |
| BP | 0014 positive regulation of glutamate secretion                | 2/292 | 233 | 472  | 349  | 2 |
|    | 049                                                            |       | 28  | 407  | 716  |   |
|    | GO:                                                            |       | 15/ | 0.01 | 0.01 |   |
| BP | 0021 glial cell fate commitment                                | 2/292 | 233 | 472  | 349  | 2 |
|    | 781                                                            |       | 28  | 407  | 716  |   |
|    | GO:                                                            |       | 15/ | 0.01 | 0.01 |   |
| BP | 0030 pancreatic juice secretion                                | 2/292 | 233 | 472  | 349  | 2 |
|    | 157                                                            |       | 28  | 407  | 716  |   |
|    | GO:                                                            |       | 15/ | 0.01 | 0.01 |   |
| BP | 0031 corticosteroid receptor signaling pathway                 | 2/292 | 233 | 472  | 349  | 2 |
|    | 958                                                            |       | 28  | 407  | 716  |   |
|    | GO:                                                            |       | 15/ | 0.01 | 0.01 |   |
| BP | 0042 dopamine biosynthetic process                             | 2/292 | 233 | 472  | 349  | 2 |
|    | 416                                                            |       | 28  | 407  | 716  |   |
|    | GO:                                                            |       | 15/ | 0.01 | 0.01 |   |
| BP | 0043 negative T cell selection                                 | 2/292 | 233 | 472  | 349  | 2 |
|    | 383                                                            |       | 28  | 407  | 716  |   |
|    | GO:                                                            |       | 15/ | 0.01 | 0.01 |   |
| BP | 0048 positive regulation of axon regeneration                  | 2/292 | 233 | 472  | 349  | 2 |
|    | 680                                                            |       | 28  | 407  | 716  |   |
|    | GO:                                                            |       | 15/ | 0.01 | 0.01 |   |
| BP | 0051 regulation of keratinocyte migration                      | 2/292 | 233 | 472  | 349  | 2 |
|    | 547                                                            |       | 28  | 407  | 716  |   |
|    | GO:                                                            |       | 15/ | 0.01 | 0.01 |   |
| BP | 0051 positive regulation of killing of cells of other organism | 2/292 | 233 | 472  | 349  | 2 |
|    | 712                                                            |       | 28  | 407  | 716  |   |
|    | GO:                                                            |       | 15/ | 0.01 | 0.01 |   |
| BP | 0072 metanephric renal vesicle morphogenesis                   | 2/292 | 233 | 472  | 349  | 2 |
|    | 283                                                            |       | 28  | 407  | 716  |   |
|    | GO:                                                            |       | 15/ | 0.01 | 0.01 |   |
| BP | 0099 postsynapse to nucleus signaling pathway                  | 2/292 | 233 | 472  | 349  | 2 |
|    | 527                                                            |       | 28  | 407  | 716  |   |
|    | GO:                                                            |       | 15/ | 0.01 | 0.01 |   |
| BP | 1900 negative regulation of receptor binding                   | 2/292 | 233 | 472  | 349  | 2 |
|    | 121                                                            |       | 28  | 407  | 716  |   |
|    | GO:                                                            |       | 15/ | 0.01 | 0.01 |   |
| BP | 1903 positive regulation of exosomal secretion                 | 2/292 | 233 | 472  | 349  | 2 |
|    | 543                                                            |       | 28  | 407  | 716  |   |

|    |                                                  |        |     |      |      |   |
|----|--------------------------------------------------|--------|-----|------|------|---|
|    | GO: regulation of blood vessel endothelial cell  |        | 15/ | 0.01 | 0.01 |   |
| BP | 1903 proliferation involved in sprouting         | 2/292  | 233 | 472  | 349  | 2 |
|    | 587 angiogenesis                                 |        | 28  | 407  | 716  |   |
|    | GO: regulation of amino acid transmembrane       |        | 15/ | 0.01 | 0.01 |   |
| BP | 1903 transport                                   | 2/292  | 233 | 472  | 349  | 2 |
|    | 789                                              |        | 28  | 407  | 716  |   |
|    | GO: inhibitory synapse assembly                  |        | 15/ | 0.01 | 0.01 |   |
| BP | 1904                                             | 2/292  | 233 | 472  | 349  | 2 |
|    | 862                                              |        | 28  | 407  | 716  |   |
|    | GO: positive regulation of extrinsic apoptotic   |        | 15/ | 0.01 | 0.01 |   |
| BP | 2001 signaling pathway in absence of ligand      | 2/292  | 233 | 472  | 349  | 2 |
|    | 241                                              |        | 28  | 407  | 716  |   |
|    | GO: phenol-containing compound metabolic         |        | 115 | 0.01 | 0.01 |   |
| BP | 0018 process                                     | 5/292  | /23 | 493  | 367  | 5 |
|    | 958                                              |        | 328 | 02   | 253  |   |
|    | GO: viral genome replication                     |        | 115 | 0.01 | 0.01 |   |
| BP | 0019                                             | 5/292  | /23 | 493  | 367  | 5 |
|    | 079                                              |        | 328 | 02   | 253  |   |
|    | GO: muscle cell development                      |        | 205 | 0.01 | 0.01 |   |
| BP | 0055                                             | 7/292  | /23 | 501  | 374  | 7 |
|    | 001                                              |        | 328 | 151  | 017  |   |
|    | GO: cellular response to steroid hormone         |        | 159 | 0.01 | 0.01 |   |
| BP | 0071 stimulus                                    | 6/292  | /23 | 519  | 389  | 6 |
|    | 383                                              |        | 328 | 048  | 709  |   |
|    | GO: cellular process involved in reproduction in |        | 468 | 0.01 | 0.01 |   |
| BP | 0022 multicellular organism                      | 12/292 | /23 | 544  | 411  | 1 |
|    | 412                                              |        | 328 | 084  | 867  | 2 |
|    | GO: antigen processing and presentation          |        | 116 | 0.01 | 0.01 |   |
| BP | 0019                                             | 5/292  | /23 | 544  | 411  | 5 |
|    | 882                                              |        | 328 | 798  | 867  |   |
|    | GO: negative regulation of adaptive immune       |        | 42/ | 0.01 | 0.01 |   |
| BP | 0002 response based on somatic recombination of  | 3/292  | 233 | 555  | 417  | 3 |
|    | 823 immune receptors built from                  |        | 28  | 057  | 032  |   |
|    | immunoglobulin superfamily domains               |        |     |      |      |   |
|    | GO: positive regulation of sodium ion transport  |        | 42/ | 0.01 | 0.01 |   |
| BP | 0010                                             | 3/292  | 233 | 555  | 417  | 3 |
|    | 765                                              |        | 28  | 057  | 032  |   |
|    | GO: homeostasis of number of cells within a      |        | 42/ | 0.01 | 0.01 |   |
| BP | 0048 tissue                                      | 3/292  | 233 | 555  | 417  | 3 |
|    | 873                                              |        | 28  | 057  | 032  |   |
|    | GO: negative regulation of striated muscle cell  |        | 42/ | 0.01 | 0.01 |   |
| BP | 0051 differentiation                             | 3/292  | 233 | 555  | 417  | 3 |
|    | 154                                              |        | 28  | 057  | 032  |   |

|    |      |                                                                                       |       |     |      |      |   |
|----|------|---------------------------------------------------------------------------------------|-------|-----|------|------|---|
|    | GO:  |                                                                                       |       | 42/ | 0.01 | 0.01 |   |
| BP | 1900 | negative regulation of cellular response to insulin stimulus                          | 3/292 | 233 | 555  | 417  | 3 |
|    | 077  |                                                                                       |       | 28  | 057  | 032  |   |
|    | GO:  |                                                                                       |       | 42/ | 0.01 | 0.01 |   |
| BP | 2000 | regulation of protein localization to cell surface                                    | 3/292 | 233 | 555  | 417  | 3 |
|    | 008  |                                                                                       |       | 28  | 057  | 032  |   |
|    | GO:  |                                                                                       |       | 77/ | 0.01 | 0.01 |   |
| BP | 1903 | regulation of oxidative stress-induced cell death                                     | 4/292 | 233 | 593  | 450  | 4 |
|    | 201  |                                                                                       |       | 28  | 749  | 856  |   |
|    | GO:  |                                                                                       |       | 77/ | 0.01 | 0.01 |   |
| BP | 2000 | positive regulation of DNA biosynthetic process                                       | 4/292 | 233 | 593  | 450  | 4 |
|    | 573  |                                                                                       |       | 28  | 749  | 856  |   |
|    | GO:  |                                                                                       |       | 43/ | 0.01 | 0.01 |   |
| BP | 0038 | peptidyl-tyrosine autophosphorylation                                                 | 3/292 | 233 | 656  | 498  | 3 |
|    | 083  |                                                                                       |       | 28  | 527  | 65   |   |
|    | GO:  |                                                                                       |       | 43/ | 0.01 | 0.01 |   |
| BP | 0040 | positive regulation of multicellular organism growth                                  | 3/292 | 233 | 656  | 498  | 3 |
|    | 018  |                                                                                       |       | 28  | 527  | 65   |   |
|    | GO:  | intrinsic apoptotic signaling pathway in response to DNA damage by p53 class mediator | 3/292 | 43/ | 0.01 | 0.01 |   |
| BP | 0042 |                                                                                       |       | 233 | 656  | 498  | 3 |
|    | 771  |                                                                                       |       | 28  | 527  | 65   |   |
|    | GO:  |                                                                                       |       | 43/ | 0.01 | 0.01 |   |
| BP | 1901 | positive regulation of potassium ion transmembrane transport                          | 3/292 | 233 | 656  | 498  | 3 |
|    | 381  |                                                                                       |       | 28  | 527  | 65   |   |
|    | GO:  |                                                                                       |       | 16/ | 0.01 | 0.01 |   |
| BP | 0002 | T-helper cell lineage commitment                                                      | 2/292 | 233 | 668  | 498  | 2 |
|    | 295  |                                                                                       |       | 28  | 99   | 65   |   |
|    | GO:  |                                                                                       |       | 16/ | 0.01 | 0.01 |   |
| BP | 0002 | dendritic cell chemotaxis                                                             | 2/292 | 233 | 668  | 498  | 2 |
|    | 407  |                                                                                       |       | 28  | 99   | 65   |   |
|    | GO:  |                                                                                       |       | 16/ | 0.01 | 0.01 |   |
| BP | 0002 | positive regulation of acute inflammatory response to antigenic stimulus              | 2/292 | 233 | 668  | 498  | 2 |
|    | 866  |                                                                                       |       | 28  | 99   | 65   |   |
|    | GO:  |                                                                                       |       | 16/ | 0.01 | 0.01 |   |
| BP | 0003 | ventricular trabecula myocardium morphogenesis                                        | 2/292 | 233 | 668  | 498  | 2 |
|    | 222  |                                                                                       |       | 28  | 99   | 65   |   |
|    | GO:  |                                                                                       |       | 16/ | 0.01 | 0.01 |   |
| BP | 0007 | activation of NF-kappaB-inducing kinase activity                                      | 2/292 | 233 | 668  | 498  | 2 |
|    | 250  |                                                                                       |       | 28  | 99   | 65   |   |
|    | GO:  |                                                                                       |       | 16/ | 0.01 | 0.01 |   |
| BP | 0042 | gamma-delta T cell differentiation                                                    | 2/292 | 233 | 668  | 498  | 2 |
|    | 492  |                                                                                       |       | 28  | 99   | 65   |   |

|    |                                                   |       |     |      |      |   |
|----|---------------------------------------------------|-------|-----|------|------|---|
|    | GO:                                               |       | 16/ | 0.01 | 0.01 |   |
| BP | 0042 anagen                                       | 2/292 | 233 | 668  | 498  | 2 |
|    | 640                                               |       | 28  | 99   | 65   |   |
|    | GO:                                               |       | 16/ | 0.01 | 0.01 |   |
| BP | 0048 regulation of isotype switching to IgG       | 2/292 | 233 | 668  | 498  | 2 |
|    | 302 isotypes                                      |       | 28  | 99   | 65   |   |
|    | GO:                                               |       | 16/ | 0.01 | 0.01 |   |
| BP | 0050 positive regulation of T cell receptor       | 2/292 | 233 | 668  | 498  | 2 |
|    | 862 signaling pathway                             |       | 28  | 99   | 65   |   |
|    | GO:                                               |       | 16/ | 0.01 | 0.01 |   |
| BP | 0051 regulation of neurotrophin TRK receptor      | 2/292 | 233 | 668  | 498  | 2 |
|    | 386 signaling pathway                             |       | 28  | 99   | 65   |   |
|    | GO:                                               |       | 16/ | 0.01 | 0.01 |   |
| BP | 0055 neuroblast division                          | 2/292 | 233 | 668  | 498  | 2 |
|    | 057                                               |       | 28  | 99   | 65   |   |
|    | GO:                                               |       | 16/ | 0.01 | 0.01 |   |
| BP | 0060 vasculogenesis involved in coronary vascular | 2/292 | 233 | 668  | 498  | 2 |
|    | 979 morphogenesis                                 |       | 28  | 99   | 65   |   |
|    | GO:                                               |       | 16/ | 0.01 | 0.01 |   |
| BP | 0061 ganglion development                         | 2/292 | 233 | 668  | 498  | 2 |
|    | 548                                               |       | 28  | 99   | 65   |   |
|    | GO:                                               |       | 16/ | 0.01 | 0.01 |   |
| BP | 0070 leukocyte aggregation                        | 2/292 | 233 | 668  | 498  | 2 |
|    | 486                                               |       | 28  | 99   | 65   |   |
|    | GO:                                               |       | 16/ | 0.01 | 0.01 |   |
| BP | 0071 cellular response to prostaglandin stimulus  | 2/292 | 233 | 668  | 498  | 2 |
|    | 379                                               |       | 28  | 99   | 65   |   |
|    | GO:                                               |       | 16/ | 0.01 | 0.01 |   |
| BP | 0072 chemokine (C-X-C motif) ligand 2             | 2/292 | 233 | 668  | 498  | 2 |
|    | 567 production                                    |       | 28  | 99   | 65   |   |
|    | GO:                                               |       | 16/ | 0.01 | 0.01 |   |
| BP | 0097 type B pancreatic cell apoptotic process     | 2/292 | 233 | 668  | 498  | 2 |
|    | 050                                               |       | 28  | 99   | 65   |   |
|    | GO:                                               |       | 16/ | 0.01 | 0.01 |   |
| BP | 1901 regulation of endothelial cell development   | 2/292 | 233 | 668  | 498  | 2 |
|    | 550                                               |       | 28  | 99   | 65   |   |
|    | GO:                                               |       | 16/ | 0.01 | 0.01 |   |
| BP | 1903 regulation of establishment of endothelial   | 2/292 | 233 | 668  | 498  | 2 |
|    | 140 barrier                                       |       | 28  | 99   | 65   |   |
|    | GO:                                               |       | 16/ | 0.01 | 0.01 |   |
| BP | 1903 regulation of exosomal secretion             | 2/292 | 233 | 668  | 498  | 2 |
|    | 541                                               |       | 28  | 99   | 65   |   |

|    |                                                                     |       |     |      |      |   |
|----|---------------------------------------------------------------------|-------|-----|------|------|---|
|    | GO:                                                                 |       | 16/ | 0.01 | 0.01 |   |
| BP | 1903 regulation of microglial cell activation                       | 2/292 | 233 | 668  | 498  | 2 |
|    | 978                                                                 |       | 28  | 99   | 65   |   |
|    | GO:                                                                 |       | 16/ | 0.01 | 0.01 |   |
| BP | 1905 positive regulation of vascular endothelial cell proliferation | 2/292 | 233 | 668  | 498  | 2 |
|    | 564                                                                 |       | 28  | 99   | 65   |   |
|    | GO:                                                                 |       | 16/ | 0.01 | 0.01 |   |
| BP | 2000 regulation of female gonad development                         | 2/292 | 233 | 668  | 498  | 2 |
|    | 194                                                                 |       | 28  | 99   | 65   |   |
|    | GO:                                                                 |       | 16/ | 0.01 | 0.01 |   |
| BP | 2000 regulation of chemokine (C-X-C motif) ligand 2 production      | 2/292 | 233 | 668  | 498  | 2 |
|    | 341                                                                 |       | 28  | 99   | 65   |   |
|    | GO:                                                                 |       | 163 | 0.01 | 0.01 |   |
| BP | 0001 cellular glucose homeostasis                                   | 6/292 | /23 | 696  | 522  | 6 |
|    | 678                                                                 |       | 328 | 783  | 866  |   |
|    | GO:                                                                 |       | 119 | 0.01 | 0.01 |   |
| BP | 2000 regulation of DNA biosynthetic process                         | 5/292 | /23 | 707  | 531  | 5 |
|    | 278                                                                 |       | 328 | 291  | 551  |   |
|    | GO:                                                                 |       | 79/ | 0.01 | 0.01 |   |
| BP | 0032 lysosome localization                                          | 4/292 | 233 | 735  | 554  | 4 |
|    | 418                                                                 |       | 28  | 764  | 826  |   |
|    | GO:                                                                 |       | 79/ | 0.01 | 0.01 |   |
| BP | 0048 negative regulation of muscle organ development                | 4/292 | 233 | 735  | 554  | 4 |
|    | 635                                                                 |       | 28  | 764  | 826  |   |
|    | GO:                                                                 |       | 79/ | 0.01 | 0.01 |   |
| BP | 1902 positive regulation of organelle assembly                      | 4/292 | 233 | 735  | 554  | 4 |
|    | 117                                                                 |       | 28  | 764  | 826  |   |
|    | GO:                                                                 |       | 44/ | 0.01 | 0.01 |   |
| BP | 0042 regulation of natural killer cell mediated cytotoxicity        | 3/292 | 233 | 761  | 577  | 3 |
|    | 269                                                                 |       | 28  | 625  | 225  |   |
|    | GO:                                                                 |       | 120 | 0.01 | 0.01 |   |
| BP | 0033 unsaturated fatty acid metabolic process                       | 5/292 | /23 | 763  | 578  | 5 |
|    | 559                                                                 |       | 328 | 876  | 475  |   |
|    | GO:                                                                 |       | 80/ | 0.01 | 0.01 |   |
| BP | 0060 regulation of gene silencing                                   | 4/292 | 233 | 809  | 617  | 4 |
|    | 968                                                                 |       | 28  | 635  | 855  |   |
|    | GO:                                                                 |       | 80/ | 0.01 | 0.01 |   |
| BP | 2001 positive regulation of cation channel activity                 | 4/292 | 233 | 809  | 617  | 4 |
|    | 259                                                                 |       | 28  | 635  | 855  |   |
|    | GO:                                                                 |       | 45/ | 0.01 | 0.01 |   |
| BP | 0090 regulation of release of cytochrome c from mitochondria        | 3/292 | 233 | 870  | 654  | 3 |
|    | 199                                                                 |       | 28  | 361  | 009  |   |



|    |                                                              |        |     |      |      |   |
|----|--------------------------------------------------------------|--------|-----|------|------|---|
|    | GO:                                                          |        | 370 | 0.01 | 0.01 | 1 |
| BP | 0043 camera-type eye development                             | 10/292 | /23 | 873  | 654  | 0 |
|    | 010                                                          |        | 328 | 288  | 009  |   |
|    | GO:                                                          |        | 425 | 0.01 | 0.01 | 1 |
| BP | 0006 autophagy                                               | 11/292 | /23 | 874  | 654  | 1 |
|    | 914                                                          |        | 328 | 716  | 009  |   |
|    | GO:                                                          |        | 425 | 0.01 | 0.01 | 1 |
| BP | 0061 process utilizing autophagic mechanism                  | 11/292 | /23 | 874  | 654  | 1 |
|    | 919                                                          |        | 328 | 716  | 009  |   |
|    | GO:                                                          |        | 17/ | 0.01 | 0.01 |   |
| BP | 0002 negative regulation of leukocyte chemotaxis             | 2/292  | 233 | 876  | 654  | 2 |
|    | 689                                                          |        | 28  | 069  | 009  |   |
|    | GO:                                                          |        | 17/ | 0.01 | 0.01 |   |
| BP | 0003 morphogenesis of an endothelium                         | 2/292  | 233 | 876  | 654  | 2 |
|    | 159                                                          |        | 28  | 069  | 009  |   |
|    | GO:                                                          |        | 17/ | 0.01 | 0.01 |   |
| BP | 0003 pulmonary valve morphogenesis                           | 2/292  | 233 | 876  | 654  | 2 |
|    | 184                                                          |        | 28  | 069  | 009  |   |
|    | GO:                                                          |        | 17/ | 0.01 | 0.01 |   |
| BP | 0010 negative regulation of collagen metabolic process       | 2/292  | 233 | 876  | 654  | 2 |
|    | 713                                                          |        | 28  | 069  | 009  |   |
|    | GO:                                                          |        | 17/ | 0.01 | 0.01 |   |
| BP | 0019 modulation by virus of host process                     | 2/292  | 233 | 876  | 654  | 2 |
|    | 048                                                          |        | 28  | 069  | 009  |   |
|    | GO:                                                          |        | 17/ | 0.01 | 0.01 |   |
| BP | 0030 sequestering of triglyceride                            | 2/292  | 233 | 876  | 654  | 2 |
|    | 730                                                          |        | 28  | 069  | 009  |   |
|    | GO:                                                          |        | 17/ | 0.01 | 0.01 |   |
| BP | 0032 regulation of synaptic transmission, dopaminergic       | 2/292  | 233 | 876  | 654  | 2 |
|    | 225                                                          |        | 28  | 069  | 009  |   |
|    | GO:                                                          |        | 17/ | 0.01 | 0.01 |   |
| BP | 0032 positive regulation of synaptic transmission, GABAergic | 2/292  | 233 | 876  | 654  | 2 |
|    | 230                                                          |        | 28  | 069  | 009  |   |
|    | GO:                                                          |        | 17/ | 0.01 | 0.01 |   |
| BP | 0032 negative regulation of collagen biosynthetic process    | 2/292  | 233 | 876  | 654  | 2 |
|    | 966                                                          |        | 28  | 069  | 009  |   |
|    | GO:                                                          |        | 17/ | 0.01 | 0.01 |   |
| BP | 0040 negative regulation of multicellular organism growth    | 2/292  | 233 | 876  | 654  | 2 |
|    | 015                                                          |        | 28  | 069  | 009  |   |
|    | GO:                                                          |        | 17/ | 0.01 | 0.01 |   |
| BP | 0045 regulation of MHC class II biosynthetic process         | 2/292  | 233 | 876  | 654  | 2 |
|    | 346                                                          |        | 28  | 069  | 009  |   |

|    |                                                                        |       |     |      |      |   |
|----|------------------------------------------------------------------------|-------|-----|------|------|---|
|    | GO:                                                                    |       | 17/ | 0.01 | 0.01 |   |
| BP | 0048 isotype switching to IgG isotypes                                 | 2/292 | 233 | 876  | 654  | 2 |
|    | 291                                                                    |       | 28  | 069  | 009  |   |
|    | GO:                                                                    |       | 17/ | 0.01 | 0.01 |   |
| BP | 0048 forebrain morphogenesis                                           | 2/292 | 233 | 876  | 654  | 2 |
|    | 853                                                                    |       | 28  | 069  | 009  |   |
|    | GO:                                                                    |       | 17/ | 0.01 | 0.01 |   |
| BP | 0060 atrial septum morphogenesis                                       | 2/292 | 233 | 876  | 654  | 2 |
|    | 413                                                                    |       | 28  | 069  | 009  |   |
|    | GO:                                                                    |       | 17/ | 0.01 | 0.01 |   |
| BP | 0060 mammary gland epithelial cell differentiation                     | 2/292 | 233 | 876  | 654  | 2 |
|    | 644                                                                    |       | 28  | 069  | 009  |   |
|    | GO:                                                                    |       | 17/ | 0.01 | 0.01 |   |
| BP | 0060 regulation of transcription involved in cell fate commitment      | 2/292 | 233 | 876  | 654  | 2 |
|    | 850                                                                    |       | 28  | 069  | 009  |   |
|    | GO:                                                                    |       | 17/ | 0.01 | 0.01 |   |
| BP | 0060 cell migration involved in heart development                      | 2/292 | 233 | 876  | 654  | 2 |
|    | 973                                                                    |       | 28  | 069  | 009  |   |
|    | GO:                                                                    |       | 17/ | 0.01 | 0.01 |   |
| BP | 0061 endothelial tube morphogenesis                                    | 2/292 | 233 | 876  | 654  | 2 |
|    | 154                                                                    |       | 28  | 069  | 009  |   |
|    | GO:                                                                    |       | 17/ | 0.01 | 0.01 |   |
| BP | 0070 regulation of thymocyte apoptotic process                         | 2/292 | 233 | 876  | 654  | 2 |
|    | 243                                                                    |       | 28  | 069  | 009  |   |
|    | GO:                                                                    |       | 17/ | 0.01 | 0.01 |   |
| BP | 0070 renal absorption                                                  | 2/292 | 233 | 876  | 654  | 2 |
|    | 293                                                                    |       | 28  | 069  | 009  |   |
|    | GO:                                                                    |       | 17/ | 0.01 | 0.01 |   |
| BP | 0071 positive regulation of transforming growth factor beta production | 2/292 | 233 | 876  | 654  | 2 |
|    | 636                                                                    |       | 28  | 069  | 009  |   |
|    | GO:                                                                    |       | 17/ | 0.01 | 0.01 |   |
| BP | 1900 positive regulation of execution phase of apoptosis               | 2/292 | 233 | 876  | 654  | 2 |
|    | 119                                                                    |       | 28  | 069  | 009  |   |
|    | GO:                                                                    |       | 17/ | 0.01 | 0.01 |   |
| BP | 1905 negative regulation of morphogenesis of an epithelium             | 2/292 | 233 | 876  | 654  | 2 |
|    | 331                                                                    |       | 28  | 069  | 009  |   |
|    | GO:                                                                    |       | 17/ | 0.01 | 0.01 |   |
| BP | 2000 negative regulation of feeding behavior                           | 2/292 | 233 | 876  | 654  | 2 |
|    | 252                                                                    |       | 28  | 069  | 009  |   |
|    | GO:                                                                    |       | 17/ | 0.01 | 0.01 |   |
| BP | 2001 positive regulation of endothelial cell chemotaxis                | 2/292 | 233 | 876  | 654  | 2 |
|    | 028                                                                    |       | 28  | 069  | 009  |   |

|    |                                                                                      |       |     |      |      |   |
|----|--------------------------------------------------------------------------------------|-------|-----|------|------|---|
|    | GO:                                                                                  |       | 82/ | 0.01 | 0.01 |   |
| BP | 0060 inner ear receptor cell differentiation                                         | 4/292 | 233 | 963  | 729  | 4 |
|    | 113                                                                                  |       | 28  | 173  | 977  |   |
|    | GO:                                                                                  |       | 46/ | 0.01 | 0.01 |   |
| BP | 0002 regulation of natural killer cell mediated immunity                             | 3/292 | 233 | 982  | 744  | 3 |
|    | 715                                                                                  |       | 28  | 742  | 722  |   |
|    | GO:                                                                                  |       | 46/ | 0.01 | 0.01 |   |
| BP | 0033 cholesterol efflux                                                              | 3/292 | 233 | 982  | 744  | 3 |
|    | 344                                                                                  |       | 28  | 742  | 722  |   |
|    | GO:                                                                                  |       | 46/ | 0.01 | 0.01 |   |
| BP | 0045 positive regulation of DNA replication                                          | 3/292 | 233 | 982  | 744  | 3 |
|    | 740                                                                                  |       | 28  | 742  | 722  |   |
|    | GO:                                                                                  |       | 124 | 0.02 | 0.01 |   |
| BP | 0043 muscle adaptation                                                               | 5/292 | 123 | 002  | 760  | 5 |
|    | 500                                                                                  |       | 328 | 588  | 506  |   |
|    | GO:                                                                                  |       | 124 | 0.02 | 0.01 |   |
| BP | 0090 positive regulation of peptide hormone secretion                                | 5/292 | 123 | 002  | 760  | 5 |
|    | 277                                                                                  |       | 328 | 588  | 506  |   |
|    | GO:                                                                                  |       | 18/ | 0.02 | 0.01 |   |
| BP | 0001 regulation of systemic arterial blood pressure by circulatory renin-angiotensin | 2/292 | 233 | 093  | 822  | 2 |
|    | 991                                                                                  |       | 28  | 354  | 93   |   |
|    | GO:                                                                                  |       | 18/ | 0.02 | 0.01 |   |
| BP | 0002 osteoblast development                                                          | 2/292 | 233 | 093  | 822  | 2 |
|    | 076                                                                                  |       | 28  | 354  | 93   |   |
|    | GO:                                                                                  |       | 18/ | 0.02 | 0.01 |   |
| BP | 0002 positive regulation of response to tumor cell                                   | 2/292 | 233 | 093  | 822  | 2 |
|    | 836                                                                                  |       | 28  | 354  | 93   |   |
|    | GO:                                                                                  |       | 18/ | 0.02 | 0.01 |   |
| BP | 0002 positive regulation of immune response to tumor cell                            | 2/292 | 233 | 093  | 822  | 2 |
|    | 839                                                                                  |       | 28  | 354  | 93   |   |
|    | GO:                                                                                  |       | 18/ | 0.02 | 0.01 |   |
| BP | 0007 blastoderm segmentation                                                         | 2/292 | 233 | 093  | 822  | 2 |
|    | 350                                                                                  |       | 28  | 354  | 93   |   |
|    | GO:                                                                                  |       | 18/ | 0.02 | 0.01 |   |
| BP | 0009 mRNA transcription                                                              | 2/292 | 233 | 093  | 822  | 2 |
|    | 299                                                                                  |       | 28  | 354  | 93   |   |
|    | GO:                                                                                  |       | 18/ | 0.02 | 0.01 |   |
| BP | 0014 regulation of neuron maturation                                                 | 2/292 | 233 | 093  | 822  | 2 |
|    | 041                                                                                  |       | 28  | 354  | 93   |   |
|    | GO:                                                                                  |       | 18/ | 0.02 | 0.01 |   |
| BP | 0016 protein autoprocessing                                                          | 2/292 | 233 | 093  | 822  | 2 |
|    | 540                                                                                  |       | 28  | 354  | 93   |   |

|    |      |                                                       |        |      |      |       |
|----|------|-------------------------------------------------------|--------|------|------|-------|
|    | GO:  |                                                       | 18/    | 0.02 | 0.01 |       |
| BP | 0021 | preganglionic parasympathetic fiber development       | 2/292  | 233  | 093  | 822 2 |
|    | 783  |                                                       |        | 28   | 354  | 93    |
|    | GO:  |                                                       | 18/    | 0.02 | 0.01 |       |
| BP | 0034 | response to prostaglandin E                           | 2/292  | 233  | 093  | 822 2 |
|    | 695  |                                                       |        | 28   | 354  | 93    |
|    | GO:  |                                                       | 18/    | 0.02 | 0.01 |       |
| BP | 0038 | Fc receptor signaling pathway                         | 2/292  | 233  | 093  | 822 2 |
|    | 093  |                                                       |        | 28   | 354  | 93    |
|    | GO:  |                                                       | 18/    | 0.02 | 0.01 |       |
| BP | 0042 | maternal behavior                                     | 2/292  | 233  | 093  | 822 2 |
|    | 711  |                                                       |        | 28   | 354  | 93    |
|    | GO:  |                                                       | 18/    | 0.02 | 0.01 |       |
| BP | 0050 | negative regulation of cytokine secretion             | 2/292  | 233  | 093  | 822 2 |
|    | 710  |                                                       |        | 28   | 354  | 93    |
|    | GO:  |                                                       | 18/    | 0.02 | 0.01 |       |
| BP | 0051 | positive regulation of nitric-oxide synthase activity | 2/292  | 233  | 093  | 822 2 |
|    | 000  |                                                       |        | 28   | 354  | 93    |
|    | GO:  |                                                       | 18/    | 0.02 | 0.01 |       |
| BP | 0051 | regulation of neurotransmitter uptake                 | 2/292  | 233  | 093  | 822 2 |
|    | 580  |                                                       |        | 28   | 354  | 93    |
|    | GO:  |                                                       | 18/    | 0.02 | 0.01 |       |
| BP | 0071 | regulation of podosome assembly                       | 2/292  | 233  | 093  | 822 2 |
|    | 801  |                                                       |        | 28   | 354  | 93    |
|    | GO:  |                                                       | 18/    | 0.02 | 0.01 |       |
| BP | 0072 | renal vesicle morphogenesis                           | 2/292  | 233  | 093  | 822 2 |
|    | 077  |                                                       |        | 28   | 354  | 93    |
|    | GO:  |                                                       | 18/    | 0.02 | 0.01 |       |
| BP | 1900 | regulation of defense response to bacterium           | 2/292  | 233  | 093  | 822 2 |
|    | 424  |                                                       |        | 28   | 354  | 93    |
|    | GO:  |                                                       | 18/    | 0.02 | 0.01 |       |
| BP | 1901 | regulation of mitotic spindle assembly                | 2/292  | 233  | 093  | 822 2 |
|    | 673  |                                                       |        | 28   | 354  | 93    |
|    | GO:  |                                                       | 18/    | 0.02 | 0.01 |       |
| BP | 1903 | negative regulation of glycoprotein metabolic process | 2/292  | 233  | 093  | 822 2 |
|    | 019  |                                                       |        | 28   | 354  | 93    |
|    | GO:  |                                                       | 489    | 0.02 | 0.01 |       |
| BP | 0015 | monovalent inorganic cation transport                 | 12/292 | /23  | 095  | 823 1 |
|    | 672  |                                                       |        | 328  | 514  | 347 2 |
|    | GO:  |                                                       | 47/    | 0.02 | 0.01 |       |
| BP | 0002 | negative regulation of adaptive immune response       | 3/292  | 233  | 098  | 823 3 |
|    | 820  |                                                       |        | 28   | 773  | 347   |

|    |      |                                                                           |        |      |      |     |   |
|----|------|---------------------------------------------------------------------------|--------|------|------|-----|---|
|    | GO:  |                                                                           | 47/    | 0.02 | 0.01 |     |   |
| BP | 0003 | endocardial cushion development                                           | 3/292  | 233  | 098  | 823 | 3 |
|    |      | 197                                                                       |        | 28   | 773  | 347 |   |
|    | GO:  |                                                                           | 47/    | 0.02 | 0.01 |     |   |
| BP | 0032 | regulation of natural killer cell activation                              | 3/292  | 233  | 098  | 823 | 3 |
|    |      | 814                                                                       |        | 28   | 773  | 347 |   |
|    | GO:  |                                                                           | 47/    | 0.02 | 0.01 |     |   |
| BP | 0050 | detection of mechanical stimulus involved in sensory perception           | 3/292  | 233  | 098  | 823 | 3 |
|    |      | 974                                                                       |        | 28   | 773  | 347 |   |
|    | GO:  |                                                                           | 84/    | 0.02 | 0.01 |     |   |
| BP | 0051 | modulation of process of other organism involved in symbiotic interaction | 4/292  | 233  | 124  | 844 | 4 |
|    |      | 817                                                                       |        | 28   | 52   | 846 |   |
|    | GO:  |                                                                           | 173    | 0.02 | 0.01 |     |   |
| BP | 0043 | negative regulation of MAPK cascade                                       | 6/292  | /23  | 202  | 911 | 6 |
|    |      | 409                                                                       |        | 328  | 594  | 743 |   |
|    | GO:  |                                                                           | 85/    | 0.02 | 0.01 |     |   |
| BP | 0030 | glycosaminoglycan metabolic process                                       | 4/292  | 233  | 208  | 914 | 4 |
|    |      | 203                                                                       |        | 28   | 15   | 764 |   |
|    | GO:  |                                                                           | 85/    | 0.02 | 0.01 |     |   |
| BP | 0030 | cholesterol transport                                                     | 4/292  | 233  | 208  | 914 | 4 |
|    |      | 301                                                                       |        | 28   | 15   | 764 |   |
|    | GO:  |                                                                           | 48/    | 0.02 | 0.01 |     |   |
| BP | 0030 | negative regulation of blood coagulation                                  | 3/292  | 233  | 218  | 921 | 3 |
|    |      | 195                                                                       |        | 28   | 457  | 895 |   |
|    | GO:  |                                                                           | 48/    | 0.02 | 0.01 |     |   |
| BP | 0090 | regulation of calcium ion import                                          | 3/292  | 233  | 218  | 921 | 3 |
|    |      | 279                                                                       |        | 28   | 457  | 895 |   |
|    | GO:  |                                                                           | 437    | 0.02 | 0.01 |     |   |
| BP | 0007 | small GTPase mediated signal transduction                                 | 11/292 | /23  | 246  | 944 | 1 |
|    |      | 264                                                                       |        | 328  | 169  | 989 | 1 |
|    | GO:  |                                                                           | 174    | 0.02 | 0.01 |     |   |
| BP | 0015 | monocarboxylic acid transport                                             | 6/292  | /23  | 258  | 954 | 6 |
|    |      | 718                                                                       |        | 328  | 193  | 484 |   |
|    | GO:  |                                                                           | 128    | 0.02 | 0.01 |     |   |
| BP | 0045 | positive regulation of translation                                        | 5/292  | /23  | 261  | 956 | 5 |
|    |      | 727                                                                       |        | 328  | 535  | 459 |   |
|    | GO:  |                                                                           | 438    | 0.02 | 0.01 |     |   |
| BP | 0043 | regulation of protein-containing complex assembly                         | 11/292 | /23  | 279  | 970 | 1 |
|    |      | 254                                                                       |        | 328  | 393  | 984 | 1 |
|    | GO:  |                                                                           | 86/    | 0.02 | 0.01 |     |   |
| BP | 0015 | sterol transport                                                          | 4/292  | 233  | 293  | 982 | 4 |
|    |      | 918                                                                       |        | 28   | 766  | 426 |   |

|    |                                                                                      |       |     |      |      |   |
|----|--------------------------------------------------------------------------------------|-------|-----|------|------|---|
|    | GO:                                                                                  |       | 328 | 0.02 | 0.01 |   |
| BP | 0048 embryonic organ morphogenesis                                                   | 9/292 | /23 | 298  | 982  | 9 |
|    | 562                                                                                  |       | 328 | 784  | 426  |   |
|    | GO:                                                                                  |       | 175 | 0.02 | 0.01 |   |
| BP | 0035 appendage morphogenesis                                                         | 6/292 | /23 | 314  | 982  | 6 |
|    | 107                                                                                  |       | 328 | 729  | 426  |   |
|    | GO:                                                                                  |       | 175 | 0.02 | 0.01 |   |
| BP | 0035 limb morphogenesis                                                              | 6/292 | /23 | 314  | 982  | 6 |
|    | 108                                                                                  |       | 328 | 729  | 426  |   |
|    | GO:                                                                                  |       | 19/ | 0.02 | 0.01 |   |
| BP | 0002 negative regulation of T cell mediated immunity                                 | 2/292 | 233 | 320  | 982  | 2 |
|    | 710                                                                                  |       | 28  | 557  | 426  |   |
|    | GO:                                                                                  |       | 19/ | 0.02 | 0.01 |   |
| BP | 0003 aortic valve morphogenesis                                                      | 2/292 | 233 | 320  | 982  | 2 |
|    | 180                                                                                  |       | 28  | 557  | 426  |   |
|    | GO:                                                                                  |       | 19/ | 0.02 | 0.01 |   |
| BP | 0003 cardiac right ventricle morphogenesis                                           | 2/292 | 233 | 320  | 982  | 2 |
|    | 215                                                                                  |       | 28  | 557  | 426  |   |
|    | GO:                                                                                  |       | 19/ | 0.02 | 0.01 |   |
| BP | 0006 glycosaminoglycan catabolic process                                             | 2/292 | 233 | 320  | 982  | 2 |
|    | 027                                                                                  |       | 28  | 557  | 426  |   |
|    | GO:                                                                                  |       | 19/ | 0.02 | 0.01 |   |
| BP | 0007 I-kappaB phosphorylation                                                        | 2/292 | 233 | 320  | 982  | 2 |
|    | 252                                                                                  |       | 28  | 557  | 426  |   |
|    | GO:                                                                                  |       | 19/ | 0.02 | 0.01 |   |
| BP | 0020 hemoglobin metabolic process                                                    | 2/292 | 233 | 320  | 982  | 2 |
|    | 027                                                                                  |       | 28  | 557  | 426  |   |
|    | GO:                                                                                  |       | 19/ | 0.02 | 0.01 |   |
| BP | 0021 cell proliferation in external granule layer                                    | 2/292 | 233 | 320  | 982  | 2 |
|    | 924                                                                                  |       | 28  | 557  | 426  |   |
|    | GO:                                                                                  |       | 19/ | 0.02 | 0.01 |   |
| BP | 0021 cerebellar granule cell precursor proliferation                                 | 2/292 | 233 | 320  | 982  | 2 |
|    | 930                                                                                  |       | 28  | 557  | 426  |   |
|    | GO:                                                                                  |       | 19/ | 0.02 | 0.01 |   |
| BP | 0032 regulation of interleukin-13 production                                         | 2/292 | 233 | 320  | 982  | 2 |
|    | 656                                                                                  |       | 28  | 557  | 426  |   |
|    | GO:                                                                                  |       | 19/ | 0.02 | 0.01 |   |
| BP | 0032 negative regulation of interleukin-17 production                                | 2/292 | 233 | 320  | 982  | 2 |
|    | 700                                                                                  |       | 28  | 557  | 426  |   |
|    | GO:                                                                                  |       | 19/ | 0.02 | 0.01 |   |
| BP | 0033 positive regulation of intracellular steroid hormone receptor signaling pathway | 2/292 | 233 | 320  | 982  | 2 |
|    | 145                                                                                  |       | 28  | 557  | 426  |   |

|    |                                                   |       |     |      |      |   |
|----|---------------------------------------------------|-------|-----|------|------|---|
|    | GO:                                               |       | 19/ | 0.02 | 0.01 |   |
| BP | 0035 chondrocyte proliferation                    | 2/292 | 233 | 320  | 982  | 2 |
|    | 988                                               |       | 28  | 557  | 426  |   |
|    | GO: regulation of viral-induced cytoplasmic       |       | 19/ | 0.02 | 0.01 |   |
| BP | 0039 pattern recognition receptor signaling       | 2/292 | 233 | 320  | 982  | 2 |
|    | 531 pathway                                       |       | 28  | 557  | 426  |   |
|    | GO: negative regulation of fibroblast growth      |       | 19/ | 0.02 | 0.01 |   |
| BP | 0040 factor receptor signaling pathway            | 2/292 | 233 | 320  | 982  | 2 |
|    | 037                                               |       | 28  | 557  | 426  |   |
|    | GO:                                               |       | 19/ | 0.02 | 0.01 |   |
| BP | 0042 fibrinolysis                                 | 2/292 | 233 | 320  | 982  | 2 |
|    | 730                                               |       | 28  | 557  | 426  |   |
|    | GO:                                               |       | 19/ | 0.02 | 0.01 |   |
| BP | 0043 negative regulation of vascular permeability | 2/292 | 233 | 320  | 982  | 2 |
|    | 116                                               |       | 28  | 557  | 426  |   |
|    | GO:                                               |       | 19/ | 0.02 | 0.01 |   |
| BP | 0045 negative regulation of membrane potential    | 2/292 | 233 | 320  | 982  | 2 |
|    | 837                                               |       | 28  | 557  | 426  |   |
|    | GO:                                               |       | 19/ | 0.02 | 0.01 |   |
| BP | 0060 membrane hyperpolarization                   | 2/292 | 233 | 320  | 982  | 2 |
|    | 081                                               |       | 28  | 557  | 426  |   |
|    | GO:                                               |       | 19/ | 0.02 | 0.01 |   |
| BP | 0060 mesenchymal to epithelial transition         | 2/292 | 233 | 320  | 982  | 2 |
|    | 231                                               |       | 28  | 557  | 426  |   |
|    | GO:                                               |       | 19/ | 0.02 | 0.01 |   |
| BP | 0060 trophoblast giant cell differentiation       | 2/292 | 233 | 320  | 982  | 2 |
|    | 707                                               |       | 28  | 557  | 426  |   |
|    | GO:                                               |       | 19/ | 0.02 | 0.01 |   |
| BP | 0060 parental behavior                            | 2/292 | 233 | 320  | 982  | 2 |
|    | 746                                               |       | 28  | 557  | 426  |   |
|    | GO:                                               |       | 19/ | 0.02 | 0.01 |   |
| BP | 1905 regulation of epithelial tube formation      | 2/292 | 233 | 320  | 982  | 2 |
|    | 276                                               |       | 28  | 557  | 426  |   |
|    | GO:                                               |       | 129 | 0.02 | 0.01 |   |
| BP | 0006 icosanoid metabolic process                  | 5/292 | /23 | 329  | 989  | 5 |
|    | 690                                               |       | 328 | 5    | 144  |   |
|    | GO:                                               |       | 329 | 0.02 | 0.01 |   |
| BP | 0032 regulation of intracellular transport        | 9/292 | /23 | 338  | 995  | 9 |
|    | 386                                               |       | 328 | 555  | 952  |   |
|    | GO:                                               |       | 49/ | 0.02 | 0.01 |   |
| BP | 1900 negative regulation of hemostasis            | 3/292 | 233 | 341  | 996  | 3 |
|    | 047                                               |       | 28  | 794  | 87   |   |

|    |      |                                                                |       |      |      |       |
|----|------|----------------------------------------------------------------|-------|------|------|-------|
|    | GO:  |                                                                | 49/   | 0.02 | 0.01 |       |
| BP | 2000 | regulation of cardiac muscle cell differentiation              | 3/292 | 233  | 341  | 996 3 |
|    | 725  |                                                                |       | 28   | 794  | 87    |
|    | GO:  |                                                                |       | 130  | 0.02 | 0.02  |
| BP | 0042 | regulation of circadian rhythm                                 | 5/292 | /23  | 398  | 044 5 |
|    | 752  |                                                                |       | 328  | 771  | 51    |
|    | GO:  |                                                                |       | 50/  | 0.02 | 0.02  |
| BP | 0008 | neuron recognition                                             | 3/292 | 233  | 468  | 095 3 |
|    | 038  |                                                                |       | 28   | 783  | 419   |
|    | GO:  |                                                                |       | 50/  | 0.02 | 0.02  |
| BP | 0010 | negative regulation of cellular carbohydrate metabolic process | 3/292 | 233  | 468  | 095 3 |
|    | 677  |                                                                |       | 28   | 783  | 419   |
|    | GO:  |                                                                |       | 50/  | 0.02 | 0.02  |
| BP | 0021 | olfactory lobe development                                     | 3/292 | 233  | 468  | 095 3 |
|    | 988  |                                                                |       | 28   | 783  | 419   |
|    | GO:  |                                                                |       | 50/  | 0.02 | 0.02  |
| BP | 0045 | regulation of erythrocyte differentiation                      | 3/292 | 233  | 468  | 095 3 |
|    | 646  |                                                                |       | 28   | 783  | 419   |
|    | GO:  |                                                                |       | 50/  | 0.02 | 0.02  |
| BP | 0050 | negative regulation of coagulation                             | 3/292 | 233  | 468  | 095 3 |
|    | 819  |                                                                |       | 28   | 783  | 419   |
|    | GO:  |                                                                |       | 50/  | 0.02 | 0.02  |
| BP | 0061 | cell differentiation involved in kidney development            | 3/292 | 233  | 468  | 095 3 |
|    | 005  |                                                                |       | 28   | 783  | 419   |
|    | GO:  |                                                                |       | 131  | 0.02 | 0.02  |
| BP | 0007 | determination of left/right symmetry                           | 5/292 | /23  | 469  | 095 5 |
|    | 368  |                                                                |       | 328  | 357  | 419   |
|    | GO:  |                                                                |       | 88/  | 0.02 | 0.02  |
| BP | 0034 | cellular response to unfolded protein                          | 4/292 | 233  | 470  | 095 4 |
|    | 620  |                                                                |       | 28   | 993  | 419   |
|    | GO:  |                                                                |       | 88/  | 0.02 | 0.02  |
| BP | 0045 | positive regulation of carbohydrate metabolic process          | 4/292 | 233  | 470  | 095 4 |
|    | 913  |                                                                |       | 28   | 993  | 419   |
|    | GO:  |                                                                |       | 88/  | 0.02 | 0.02  |
| BP | 0046 | response to organophosphorus                                   | 4/292 | 233  | 470  | 095 4 |
|    | 683  |                                                                |       | 28   | 993  | 419   |
|    | GO:  |                                                                |       | 88/  | 0.02 | 0.02  |
| BP | 1904 | negative regulation of cation transmembrane transport          | 4/292 | 233  | 470  | 095 4 |
|    | 063  |                                                                |       | 28   | 993  | 419   |
|    | GO:  |                                                                |       | 20/  | 0.02 | 0.02  |
| BP | 0001 | lymphangiogenesis                                              | 2/292 | 233  | 557  | 153 2 |
|    | 946  |                                                                |       | 28   | 4    | 846   |



|    |      |                                                             |       |      |      |       |
|----|------|-------------------------------------------------------------|-------|------|------|-------|
|    | GO:  |                                                             | 20/   | 0.02 | 0.02 |       |
| BP | 0002 | regulation of antigen processing and presentation           | 2/292 | 233  | 557  | 153 2 |
|    | 577  |                                                             |       | 28   | 4    | 846   |
|    | GO:  |                                                             | 20/   | 0.02 | 0.02 |       |
| BP | 0002 | MyD88-dependent toll-like receptor signaling pathway        | 2/292 | 233  | 557  | 153 2 |
|    | 755  |                                                             |       | 28   | 4    | 846   |
|    | GO:  |                                                             | 20/   | 0.02 | 0.02 |       |
| BP | 0006 | bile acid biosynthetic process                              | 2/292 | 233  | 557  | 153 2 |
|    | 699  |                                                             |       | 28   | 4    | 846   |
|    | GO:  |                                                             | 20/   | 0.02 | 0.02 |       |
| BP | 0008 | androgen metabolic process                                  | 2/292 | 233  | 557  | 153 2 |
|    | 209  |                                                             |       | 28   | 4    | 846   |
|    | GO:  |                                                             | 20/   | 0.02 | 0.02 |       |
| BP | 0030 | negative regulation of B cell proliferation                 | 2/292 | 233  | 557  | 153 2 |
|    | 889  |                                                             |       | 28   | 4    | 846   |
|    | GO:  |                                                             | 20/   | 0.02 | 0.02 |       |
| BP | 0031 | regulation of lipopolysaccharide-mediated signaling pathway | 2/292 | 233  | 557  | 153 2 |
|    | 664  |                                                             |       | 28   | 4    | 846   |
|    | GO:  |                                                             | 20/   | 0.02 | 0.02 |       |
| BP | 0034 | regulation of toll-like receptor 4 signaling pathway        | 2/292 | 233  | 557  | 153 2 |
|    | 143  |                                                             |       | 28   | 4    | 846   |
|    | GO:  |                                                             | 20/   | 0.02 | 0.02 |       |
| BP | 0046 | gamma-delta T cell activation                               | 2/292 | 233  | 557  | 153 2 |
|    | 629  |                                                             |       | 28   | 4    | 846   |
|    | GO:  |                                                             | 20/   | 0.02 | 0.02 |       |
| BP | 0051 | negative regulation of meiotic cell cycle                   | 2/292 | 233  | 557  | 153 2 |
|    | 447  |                                                             |       | 28   | 4    | 846   |
|    | GO:  |                                                             | 20/   | 0.02 | 0.02 |       |
| BP | 0071 | negative regulation of cell cycle arrest                    | 2/292 | 233  | 557  | 153 2 |
|    | 157  |                                                             |       | 28   | 4    | 846   |
|    | GO:  |                                                             | 20/   | 0.02 | 0.02 |       |
| BP | 0072 | renal vesicle development                                   | 2/292 | 233  | 557  | 153 2 |
|    | 087  |                                                             |       | 28   | 4    | 846   |
|    | GO:  |                                                             | 20/   | 0.02 | 0.02 |       |
| BP | 0072 | metanephric nephron epithelium development                  | 2/292 | 233  | 557  | 153 2 |
|    | 243  |                                                             |       | 28   | 4    | 846   |
|    | GO:  |                                                             | 20/   | 0.02 | 0.02 |       |
| BP | 1904 | cellular response to angiotensin                            | 2/292 | 233  | 557  | 153 2 |
|    | 385  |                                                             |       | 28   | 4    | 846   |
|    | GO:  |                                                             | 20/   | 0.02 | 0.02 |       |
| BP | 1990 | exosomal secretion                                          | 2/292 | 233  | 557  | 153 2 |
|    | 182  |                                                             |       | 28   | 4    | 846   |

|    |                                                                                     |       |     |      |      |   |
|----|-------------------------------------------------------------------------------------|-------|-----|------|------|---|
|    | GO:                                                                                 |       | 51/ | 0.02 | 0.02 |   |
| BP | 0030 midbrain development                                                           | 3/292 | 233 | 599  | 185  | 3 |
|    | 901                                                                                 |       | 28  | 421  | 247  |   |
|    | GO:                                                                                 |       | 51/ | 0.02 | 0.02 |   |
| BP | 0042 amyloid precursor protein catabolic process                                    | 3/292 | 233 | 599  | 185  | 3 |
|    | 987                                                                                 |       | 28  | 421  | 247  |   |
|    | GO:                                                                                 |       | 51/ | 0.02 | 0.02 |   |
| BP | 0046 phenol-containing compound biosynthetic process                                | 3/292 | 233 | 599  | 185  | 3 |
|    | 189                                                                                 |       | 28  | 421  | 247  |   |
|    | GO:                                                                                 |       | 51/ | 0.02 | 0.02 |   |
| BP | 0048 genitalia development                                                          | 3/292 | 233 | 599  | 185  | 3 |
|    | 806                                                                                 |       | 28  | 421  | 247  |   |
|    | GO:                                                                                 |       | 134 | 0.02 | 0.02 |   |
| BP | 0009 post-embryonic development                                                     | 5/292 | 723 | 689  | 259  | 5 |
|    | 791                                                                                 |       | 328 | 079  | 589  |   |
|    | GO:                                                                                 |       | 52/ | 0.02 | 0.02 |   |
| BP | 0002 positive regulation of myeloid leukocyte mediated immunity                     | 3/292 | 233 | 733  | 292  | 3 |
|    | 888                                                                                 |       | 28  | 703  | 91   |   |
|    | GO:                                                                                 |       | 52/ | 0.02 | 0.02 |   |
| BP | 0045 intermediate filament cytoskeleton organization                                | 3/292 | 233 | 733  | 292  | 3 |
|    | 104                                                                                 |       | 28  | 703  | 91   |   |
|    | GO:                                                                                 |       | 52/ | 0.02 | 0.02 |   |
| BP | 0060 regulation of microtubule-based movement                                       | 3/292 | 233 | 733  | 292  | 3 |
|    | 632                                                                                 |       | 28  | 703  | 91   |   |
|    | GO:                                                                                 |       | 52/ | 0.02 | 0.02 |   |
| BP | 1903 negative regulation of oxidative stress-induced cell death                     | 3/292 | 233 | 733  | 292  | 3 |
|    | 202                                                                                 |       | 28  | 703  | 91   |   |
|    | GO:                                                                                 |       | 91/ | 0.02 | 0.02 |   |
| BP | 0002 lens development in camera-type eye                                            | 4/292 | 233 | 751  | 306  | 4 |
|    | 088                                                                                 |       | 28  | 951  | 119  |   |
|    | GO:                                                                                 |       | 91/ | 0.02 | 0.02 |   |
| BP | 1900 regulation of cellular response to oxidative stress                            | 4/292 | 233 | 751  | 306  | 4 |
|    | 407                                                                                 |       | 28  | 951  | 119  |   |
|    | GO:                                                                                 |       | 135 | 0.02 | 0.02 |   |
| BP | 1901 cellular response to ketone                                                    | 5/292 | 723 | 764  | 315  | 5 |
|    | 655                                                                                 |       | 328 | 997  | 999  |   |
|    | GO:                                                                                 |       | 21/ | 0.02 | 0.02 |   |
| BP | 0002 blood vessel endothelial cell proliferation involved in sprouting angiogenesis | 2/292 | 233 | 803  | 333  | 2 |
|    | 043                                                                                 |       | 28  | 606  | 509  |   |
|    | GO:                                                                                 |       | 21/ | 0.02 | 0.02 |   |
| BP | 0003 growth plate cartilage development                                             | 2/292 | 233 | 803  | 333  | 2 |
|    | 417                                                                                 |       | 28  | 606  | 509  |   |

|    |                                                          |       |     |      |      |   |
|----|----------------------------------------------------------|-------|-----|------|------|---|
|    | GO:                                                      |       | 21/ | 0.02 | 0.02 |   |
| BP | 0006 glycerol metabolic process                          | 2/292 | 233 | 803  | 333  | 2 |
|    | 071                                                      |       | 28  | 606  | 509  |   |
|    | GO:                                                      |       | 21/ | 0.02 | 0.02 |   |
| BP | 0010 response to iron ion                                | 2/292 | 233 | 803  | 333  | 2 |
|    | 039                                                      |       | 28  | 606  | 509  |   |
|    | GO:                                                      |       | 21/ | 0.02 | 0.02 |   |
| BP | 0036 dendritic cell migration                            | 2/292 | 233 | 803  | 333  | 2 |
|    | 336                                                      |       | 28  | 606  | 509  |   |
|    | GO:                                                      |       | 21/ | 0.02 | 0.02 |   |
| BP | 0045 positive regulation of glycolytic process           | 2/292 | 233 | 803  | 333  | 2 |
|    | 821                                                      |       | 28  | 606  | 509  |   |
|    | GO:                                                      |       | 21/ | 0.02 | 0.02 |   |
| BP | 0046 muscle cell cellular homeostasis                    | 2/292 | 233 | 803  | 333  | 2 |
|    | 716                                                      |       | 28  | 606  | 509  |   |
|    | GO:                                                      |       | 21/ | 0.02 | 0.02 |   |
| BP | 0060 interferon-gamma-mediated signaling pathway         | 2/292 | 233 | 803  | 333  | 2 |
|    | 333                                                      |       | 28  | 606  | 509  |   |
|    | GO:                                                      |       | 21/ | 0.02 | 0.02 |   |
| BP | 0060 negative regulation of digestive system process     | 2/292 | 233 | 803  | 333  | 2 |
|    | 457                                                      |       | 28  | 606  | 509  |   |
|    | GO:                                                      |       | 21/ | 0.02 | 0.02 |   |
| BP | 0072 metanephric tubule development                      | 2/292 | 233 | 803  | 333  | 2 |
|    | 170                                                      |       | 28  | 606  | 509  |   |
|    | GO:                                                      |       | 21/ | 0.02 | 0.02 |   |
| BP | 0090 regulation of protein kinase C signaling            | 2/292 | 233 | 803  | 333  | 2 |
|    | 036                                                      |       | 28  | 606  | 509  |   |
|    | GO:                                                      |       | 21/ | 0.02 | 0.02 |   |
| BP | 0097 extracellular exosome biogenesis                    | 2/292 | 233 | 803  | 333  | 2 |
|    | 734                                                      |       | 28  | 606  | 509  |   |
|    | GO:                                                      |       | 21/ | 0.02 | 0.02 |   |
| BP | 1902 positive regulation of amyloid-beta formation       | 2/292 | 233 | 803  | 333  | 2 |
|    | 004                                                      |       | 28  | 606  | 509  |   |
|    | GO:                                                      |       | 21/ | 0.02 | 0.02 |   |
| BP | 2001 positive regulation of neuron migration             | 2/292 | 233 | 803  | 333  | 2 |
|    | 224                                                      |       | 28  | 606  | 509  |   |
|    | GO:                                                      |       | 92/ | 0.02 | 0.02 |   |
| BP | 0002 myeloid cell activation involved in immune response | 4/292 | 233 | 849  | 369  | 4 |
|    | 275                                                      |       | 28  | 665  | 708  |   |
|    | GO:                                                      |       | 92/ | 0.02 | 0.02 |   |
| BP | 0055 iron ion homeostasis                                | 4/292 | 233 | 849  | 369  | 4 |
|    | 072                                                      |       | 28  | 665  | 708  |   |

|    |                                                                   |       |     |      |      |   |
|----|-------------------------------------------------------------------|-------|-----|------|------|---|
|    | GO:                                                               |       | 53/ | 0.02 | 0.02 |   |
| BP | 0031 axon regeneration                                            | 3/292 | 233 | 871  | 382  | 3 |
|    | 103                                                               |       | 28  | 622  | 599  |   |
|    | GO:                                                               |       | 53/ | 0.02 | 0.02 |   |
| BP | 0045 intermediate filament-based process                          | 3/292 | 233 | 871  | 382  | 3 |
|    | 103                                                               |       | 28  | 622  | 599  |   |
|    | GO:                                                               |       | 53/ | 0.02 | 0.02 |   |
| BP | 0046 negative regulation of insulin secretion                     | 3/292 | 233 | 871  | 382  | 3 |
|    | 676                                                               |       | 28  | 622  | 599  |   |
|    | GO:                                                               |       | 53/ | 0.02 | 0.02 |   |
| BP | 0055 ventricular cardiac muscle tissue morphogenesis              | 3/292 | 233 | 871  | 382  | 3 |
|    | 010                                                               |       | 28  | 622  | 599  |   |
|    | GO:                                                               |       | 53/ | 0.02 | 0.02 |   |
| BP | 1900 negative regulation of cellular response to oxidative stress | 3/292 | 233 | 871  | 382  | 3 |
|    | 408                                                               |       | 28  | 622  | 599  |   |
|    | GO:                                                               |       | 235 | 0.02 | 0.02 |   |
| BP | 0021 central nervous system neuron differentiation                | 7/292 | /23 | 901  | 405  | 7 |
|    | 953                                                               |       | 328 | 536  | 255  |   |
|    | GO:                                                               |       | 235 | 0.02 | 0.02 |   |
| BP | 0031 positive regulation of protein-containing complex assembly   | 7/292 | /23 | 901  | 405  | 7 |
|    | 334                                                               |       | 328 | 536  | 255  |   |
|    | GO:                                                               |       | 137 | 0.02 | 0.02 |   |
| BP | 0007 cell cycle arrest                                            | 5/292 | /23 | 920  | 420  | 5 |
|    | 050                                                               |       | 328 | 89   | 211  |   |
|    | GO:                                                               |       | 138 | 0.03 | 0.02 |   |
| BP | 0001 action potential                                             | 5/292 | /23 | 000  | 484  | 5 |
|    | 508                                                               |       | 328 | 877  | 256  |   |
|    | GO:                                                               |       | 138 | 0.03 | 0.02 |   |
| BP | 0097 cellular response to alcohol                                 | 5/292 | /23 | 000  | 484  | 5 |
|    | 306                                                               |       | 328 | 877  | 256  |   |
|    | GO:                                                               |       | 54/ | 0.03 | 0.02 |   |
| BP | 0032 response to estradiol                                        | 3/292 | 233 | 013  | 488  | 3 |
|    | 355                                                               |       | 28  | 171  | 851  |   |
|    | GO:                                                               |       | 54/ | 0.03 | 0.02 |   |
| BP | 0042 hydrogen peroxide metabolic process                          | 3/292 | 233 | 013  | 488  | 3 |
|    | 743                                                               |       | 28  | 171  | 851  |   |
|    | GO:                                                               |       | 54/ | 0.03 | 0.02 |   |
| BP | 0043 regulation of leukocyte degranulation                        | 3/292 | 233 | 013  | 488  | 3 |
|    | 300                                                               |       | 28  | 171  | 851  |   |
|    | GO:                                                               |       | 54/ | 0.03 | 0.02 |   |
| BP | 0048 digestive tract morphogenesis                                | 3/292 | 233 | 013  | 488  | 3 |
|    | 546                                                               |       | 28  | 171  | 851  |   |

|    |                                                                        |       |     |      |      |   |
|----|------------------------------------------------------------------------|-------|-----|------|------|---|
|    | GO:                                                                    |       | 54/ | 0.03 | 0.02 |   |
| BP | 0070 response to fatty acid                                            | 3/292 | 233 | 013  | 488  | 3 |
|    | 542                                                                    |       | 28  | 171  | 851  |   |
|    | GO:                                                                    |       | 22/ | 0.03 | 0.02 |   |
| BP | 0003 type B pancreatic cell development                                | 2/292 | 233 | 058  | 514  | 2 |
|    | 323                                                                    |       | 28  | 905  | 247  |   |
|    | GO:                                                                    |       | 22/ | 0.03 | 0.02 |   |
| BP | 0010 positive regulation of cardiac muscle cell apoptotic process      | 2/292 | 233 | 058  | 514  | 2 |
|    | 666                                                                    |       | 28  | 905  | 247  |   |
|    | GO:                                                                    |       | 22/ | 0.03 | 0.02 |   |
| BP | 0048 paraxial mesoderm development                                     | 2/292 | 233 | 058  | 514  | 2 |
|    | 339                                                                    |       | 28  | 905  | 247  |   |
|    | GO:                                                                    |       | 22/ | 0.03 | 0.02 |   |
| BP | 0051 positive regulation of nitric-oxide synthase biosynthetic process | 2/292 | 233 | 058  | 514  | 2 |
|    | 770                                                                    |       | 28  | 905  | 247  |   |
|    | GO:                                                                    |       | 22/ | 0.03 | 0.02 |   |
| BP | 0070 thymocyte apoptotic process                                       | 2/292 | 233 | 058  | 514  | 2 |
|    | 242                                                                    |       | 28  | 905  | 247  |   |
|    | GO:                                                                    |       | 22/ | 0.03 | 0.02 |   |
| BP | 0071 podosome assembly                                                 | 2/292 | 233 | 058  | 514  | 2 |
|    | 800                                                                    |       | 28  | 905  | 247  |   |
|    | GO:                                                                    |       | 22/ | 0.03 | 0.02 |   |
| BP | 0072 metanephric nephron morphogenesis                                 | 2/292 | 233 | 058  | 514  | 2 |
|    | 273                                                                    |       | 28  | 905  | 247  |   |
|    | GO:                                                                    |       | 22/ | 0.03 | 0.02 |   |
| BP | 1901 negative regulation of NIK/NF-kappaB signaling                    | 2/292 | 233 | 058  | 514  | 2 |
|    | 223                                                                    |       | 28  | 905  | 247  |   |
|    | GO:                                                                    |       | 22/ | 0.03 | 0.02 |   |
| BP | 1903 regulation of glial cell migration                                | 2/292 | 233 | 058  | 514  | 2 |
|    | 975                                                                    |       | 28  | 905  | 247  |   |
|    | GO:                                                                    |       | 22/ | 0.03 | 0.02 |   |
| BP | 1990 response to angiotensin                                           | 2/292 | 233 | 058  | 514  | 2 |
|    | 776                                                                    |       | 28  | 905  | 247  |   |
|    | GO:                                                                    |       | 22/ | 0.03 | 0.02 |   |
| BP | 2000 positive regulation of endothelial cell apoptotic process         | 2/292 | 233 | 058  | 514  | 2 |
|    | 353                                                                    |       | 28  | 905  | 247  |   |
|    | GO:                                                                    |       | 95/ | 0.03 | 0.02 |   |
| BP | 2001 negative regulation of intrinsic apoptotic signaling pathway      | 4/292 | 233 | 155  | 592  | 4 |
|    | 243                                                                    |       | 28  | 081  | 144  |   |
|    | GO:                                                                    |       | 55/ | 0.03 | 0.02 |   |
| BP | 0006 iron ion transport                                                | 3/292 | 233 | 158  | 592  | 3 |
|    | 826                                                                    |       | 28  | 338  | 511  |   |

|    |                                                                    |       |     |      |      |   |
|----|--------------------------------------------------------------------|-------|-----|------|------|---|
|    | GO:                                                                |       | 55/ | 0.03 | 0.02 |   |
| BP | 0051 positive regulation of stress fiber assembly                  | 3/292 | 233 | 158  | 592  | 3 |
|    | 496                                                                |       | 28  | 338  | 511  |   |
|    | GO:                                                                |       | 140 | 0.03 | 0.02 |   |
| BP | 0009 determination of bilateral symmetry                           | 5/292 | /23 | 164  | 596  | 5 |
|    | 855                                                                |       | 328 | 96   | 792  |   |
|    | GO:                                                                |       | 240 | 0.03 | 0.02 |   |
| BP | 0006 potassium ion transport                                       | 7/292 | /23 | 199  | 623  | 7 |
|    | 813                                                                |       | 328 | 517  | 978  |   |
|    | GO:                                                                |       | 141 | 0.03 | 0.02 |   |
| BP | 0009 specification of symmetry                                     | 5/292 | /23 | 249  | 663  | 5 |
|    | 799                                                                |       | 328 | 069  | 432  |   |
|    | GO:                                                                |       | 350 | 0.03 | 0.02 |   |
| BP | 0007 Ras protein signal transduction                               | 9/292 | /23 | 291  | 696  | 9 |
|    | 265                                                                |       | 328 | 176  | 752  |   |
|    | GO:                                                                |       | 56/ | 0.03 | 0.02 |   |
| BP | 0002 negative regulation of leukocyte mediated immunity            | 3/292 | 233 | 307  | 703  | 3 |
|    | 704                                                                |       | 28  | 112  | 807  |   |
|    | GO:                                                                |       | 56/ | 0.03 | 0.02 |   |
| BP | 0017 stem cell division                                            | 3/292 | 233 | 307  | 703  | 3 |
|    | 145                                                                |       | 28  | 112  | 807  |   |
|    | GO:                                                                |       | 56/ | 0.03 | 0.02 |   |
| BP | 0051 synaptic transmission, GABAergic                              | 3/292 | 233 | 307  | 703  | 3 |
|    | 932                                                                |       | 28  | 112  | 807  |   |
|    | GO:                                                                |       | 56/ | 0.03 | 0.02 |   |
| BP | 1900 regulation of glutamate receptor signaling pathway            | 3/292 | 233 | 307  | 703  | 3 |
|    | 449                                                                |       | 28  | 112  | 807  |   |
|    | GO:                                                                |       | 56/ | 0.03 | 0.02 |   |
| BP | 1902 negative regulation of response to oxidative stress           | 3/292 | 233 | 307  | 703  | 3 |
|    | 883                                                                |       | 28  | 112  | 807  |   |
|    | GO:                                                                |       | 23/ | 0.03 | 0.02 |   |
| BP | 0002 regulation of response to tumor cell                          | 2/292 | 233 | 323  | 707  | 2 |
|    | 834                                                                |       | 28  | 034  | 228  |   |
|    | GO:                                                                |       | 23/ | 0.03 | 0.02 |   |
| BP | 0002 regulation of immune response to tumor cell                   | 2/292 | 233 | 323  | 707  | 2 |
|    | 837                                                                |       | 28  | 034  | 228  |   |
|    | GO:                                                                |       | 23/ | 0.03 | 0.02 |   |
| BP | 0010 positive regulation of striated muscle cell apoptotic process | 2/292 | 233 | 323  | 707  | 2 |
|    | 663                                                                |       | 28  | 034  | 228  |   |
|    | GO:                                                                |       | 23/ | 0.03 | 0.02 |   |
| BP | 0032 regulation of appetite                                        | 2/292 | 233 | 323  | 707  | 2 |
|    | 098                                                                |       | 28  | 034  | 228  |   |

|    |                                                              |       |     |      |      |   |
|----|--------------------------------------------------------------|-------|-----|------|------|---|
|    | GO:                                                          |       | 23/ | 0.03 | 0.02 |   |
| BP | 0036 lymph vessel morphogenesis                              | 2/292 | 233 | 323  | 707  | 2 |
|    | 303                                                          |       | 28  | 034  | 228  |   |
|    | GO:                                                          |       | 23/ | 0.03 | 0.02 |   |
| BP | 0048 mesodermal cell differentiation                         | 2/292 | 233 | 323  | 707  | 2 |
|    | 333                                                          |       | 28  | 034  | 228  |   |
|    | GO:                                                          |       | 23/ | 0.03 | 0.02 |   |
| BP | 0071 cellular response to cadmium ion                        | 2/292 | 233 | 323  | 707  | 2 |
|    | 276                                                          |       | 28  | 034  | 228  |   |
|    | GO:                                                          |       | 23/ | 0.03 | 0.02 |   |
| BP | 0140 extracellular vesicle biogenesis                        | 2/292 | 233 | 323  | 707  | 2 |
|    | 112                                                          |       | 28  | 034  | 228  |   |
|    | GO:                                                          |       | 142 | 0.03 | 0.02 |   |
| BP | 0050 detection of stimulus involved in sensory perception    | 5/292 | /23 | 334  | 715  | 5 |
|    | 906                                                          |       | 328 | 561  | 42   |   |
|    | GO:                                                          |       | 191 | 0.03 | 0.02 |   |
| BP | 0007 synapse assembly                                        | 6/292 | /23 | 351  | 727  | 6 |
|    | 416                                                          |       | 328 | 469  | 985  |   |
|    | GO:                                                          |       | 97/ | 0.03 | 0.02 |   |
| BP | 0006 regulation of pH                                        | 4/292 | 233 | 368  | 741  | 4 |
|    | 885                                                          |       | 28  | 969  | 02   |   |
|    | GO:                                                          |       | 57/ | 0.03 | 0.02 |   |
| BP | 0051 response to cAMP                                        | 3/292 | 233 | 459  | 813  | 3 |
|    | 591                                                          |       | 28  | 481  | 421  |   |
|    | GO:                                                          |       | 98/ | 0.03 | 0.02 |   |
| BP | 0036 cell death in response to oxidative stress              | 4/292 | 233 | 479  | 828  | 4 |
|    | 473                                                          |       | 28  | 008  | 055  |   |
|    | GO:                                                          |       | 99/ | 0.03 | 0.02 |   |
| BP | 0021 limbic system development                               | 4/292 | 233 | 591  | 907  | 4 |
|    | 761                                                          |       | 28  | 115  | 569  |   |
|    | GO:                                                          |       | 99/ | 0.03 | 0.02 |   |
| BP | 0062 negative regulation of small molecule metabolic process | 4/292 | 233 | 591  | 907  | 4 |
|    | 014                                                          |       | 28  | 115  | 569  |   |
|    | GO:                                                          |       | 24/ | 0.03 | 0.02 |   |
| BP | 0019 alditol metabolic process                               | 2/292 | 233 | 595  | 907  | 2 |
|    | 400                                                          |       | 28  | 733  | 569  |   |
|    | GO:                                                          |       | 24/ | 0.03 | 0.02 |   |
| BP | 0021 olfactory bulb interneuron differentiation              | 2/292 | 233 | 595  | 907  | 2 |
|    | 889                                                          |       | 28  | 733  | 569  |   |
|    | GO:                                                          |       | 24/ | 0.03 | 0.02 |   |
| BP | 0031 plasminogen activation                                  | 2/292 | 233 | 595  | 907  | 2 |
|    | 639                                                          |       | 28  | 733  | 569  |   |

|    |      |                                                              |       |      |      |       |
|----|------|--------------------------------------------------------------|-------|------|------|-------|
|    | GO:  |                                                              | 24/   | 0.03 | 0.02 |       |
| BP | 0031 | positive regulation of protein autophosphorylation           | 2/292 | 233  | 595  | 907 2 |
|    | 954  |                                                              |       | 28   | 733  | 569   |
|    | GO:  |                                                              | 24/   | 0.03 | 0.02 |       |
| BP | 0033 | positive regulation of mast cell activation                  | 2/292 | 233  | 595  | 907 2 |
|    | 008  | involved in immune response                                  |       | 28   | 733  | 569   |
|    | GO:  |                                                              | 24/   | 0.03 | 0.02 |       |
| BP | 0043 | positive regulation of mast cell degranulation               | 2/292 | 233  | 595  | 907 2 |
|    | 306  |                                                              |       | 28   | 733  | 569   |
|    | GO:  |                                                              | 24/   | 0.03 | 0.02 |       |
| BP | 0046 | positive regulation of insulin receptor signaling pathway    | 2/292 | 233  | 595  | 907 2 |
|    | 628  |                                                              |       | 28   | 733  | 569   |
|    | GO:  |                                                              | 24/   | 0.03 | 0.02 |       |
| BP | 0050 | negative regulation of phagocytosis                          | 2/292 | 233  | 595  | 907 2 |
|    | 765  |                                                              |       | 28   | 733  | 569   |
|    | GO:  |                                                              | 24/   | 0.03 | 0.02 |       |
| BP | 0090 | regulation of brown fat cell differentiation                 | 2/292 | 233  | 595  | 907 2 |
|    | 335  |                                                              |       | 28   | 733  | 569   |
|    | GO:  |                                                              | 24/   | 0.03 | 0.02 |       |
| BP | 1903 | negative regulation of oxidative stress-induced neuron death | 2/292 | 233  | 595  | 907 2 |
|    | 204  |                                                              |       | 28   | 733  | 569   |
|    | GO:  |                                                              | 58/   | 0.03 | 0.02 |       |
| BP | 0035 | cellular response to drug                                    | 3/292 | 233  | 615  | 922 3 |
|    | 690  |                                                              |       | 28   | 429  | 216   |
|    | GO:  |                                                              | 247   | 0.03 | 0.02 |       |
| BP | 0051 | detection of stimulus                                        | 7/292 | /23  | 650  | 948 7 |
|    | 606  |                                                              |       | 328  | 132  | 973   |
|    | GO:  |                                                              | 146   | 0.03 | 0.02 |       |
| BP | 0035 | multicellular organismal signaling                           | 5/292 | /23  | 690  | 980 5 |
|    | 637  |                                                              |       | 328  | 466  | 254   |
|    | GO:  |                                                              | 100   | 0.03 | 0.02 |       |
| BP | 1902 | regulation of response to oxidative stress                   | 4/292 | /23  | 705  | 990 4 |
|    | 882  |                                                              |       | 328  | 292  | 918   |
|    | GO:  |                                                              | 248   | 0.03 | 0.02 |       |
| BP | 0015 | energy derivation by oxidation of organic compounds          | 7/292 | /23  | 717  | 999 7 |
|    | 980  |                                                              |       | 328  | 751  | 663   |
|    | GO:  |                                                              | 59/   | 0.03 | 0.03 |       |
| BP | 0001 | release of cytochrome c from mitochondria                    | 3/292 | 233  | 774  | 040 3 |
|    | 836  |                                                              |       | 28   | 941  | 489   |
|    | GO:  |                                                              | 59/   | 0.03 | 0.03 |       |
| BP | 0002 | morphogenesis of an epithelial sheet                         | 3/292 | 233  | 774  | 040 3 |
|    | 011  |                                                              |       | 28   | 941  | 489   |



|    |                                                     |       |     |      |      |   |
|----|-----------------------------------------------------|-------|-----|------|------|---|
|    | GO:                                                 |       | 59/ | 0.03 | 0.03 |   |
| BP | 0042 neuron maturation                              | 3/292 | 233 | 774  | 040  | 3 |
|    | 551                                                 |       | 28  | 941  | 489  |   |
|    | GO:                                                 |       | 59/ | 0.03 | 0.03 |   |
| BP | 0071 regulation of cell cycle arrest                | 3/292 | 233 | 774  | 040  | 3 |
|    | 156                                                 |       | 28  | 941  | 489  |   |
|    | GO:                                                 |       | 147 | 0.03 | 0.03 |   |
| BP | 0007 cell-cell junction assembly                    | 5/292 | /23 | 782  | 045  | 5 |
|    | 043                                                 |       | 328 | 948  | 609  |   |
|    | GO:                                                 |       | 250 | 0.03 | 0.03 |   |
| BP | 0030 lipid modification                             | 7/292 | /23 | 855  | 102  | 7 |
|    | 258                                                 |       | 328 | 453  | 627  |   |
|    | GO:                                                 |       | 25/ | 0.03 | 0.03 |   |
| BP | 0002 immune response to tumor cell                  | 2/292 | 233 | 876  | 107  | 2 |
|    | 418                                                 |       | 28  | 746  | 566  |   |
|    | GO:                                                 |       | 25/ | 0.03 | 0.03 |   |
| BP | 0003 glomerular filtration                          | 2/292 | 233 | 876  | 107  | 2 |
|    | 094                                                 |       | 28  | 746  | 566  |   |
|    | GO:                                                 |       | 25/ | 0.03 | 0.03 |   |
| BP | 0008 glucocorticoid metabolic process               | 2/292 | 233 | 876  | 107  | 2 |
|    | 211                                                 |       | 28  | 746  | 566  |   |
|    | GO:                                                 |       | 25/ | 0.03 | 0.03 |   |
| BP | 0044 modulation by symbiont of host process         | 2/292 | 233 | 876  | 107  | 2 |
|    | 003                                                 |       | 28  | 746  | 566  |   |
|    | GO:                                                 |       | 25/ | 0.03 | 0.03 |   |
| BP | 0046 response to arsenic-containing substance       | 2/292 | 233 | 876  | 107  | 2 |
|    | 685                                                 |       | 28  | 746  | 566  |   |
|    | GO:                                                 |       | 25/ | 0.03 | 0.03 |   |
| BP | 0048 behavioral response to pain                    | 2/292 | 233 | 876  | 107  | 2 |
|    | 266                                                 |       | 28  | 746  | 566  |   |
|    | GO:                                                 |       | 25/ | 0.03 | 0.03 |   |
| BP | 0050 negative regulation of lipid catabolic process | 2/292 | 233 | 876  | 107  | 2 |
|    | 995                                                 |       | 28  | 746  | 566  |   |
|    | GO:                                                 |       | 25/ | 0.03 | 0.03 |   |
| BP | 0090 regulation of spindle assembly                 | 2/292 | 233 | 876  | 107  | 2 |
|    | 169                                                 |       | 28  | 746  | 566  |   |
|    | GO: negative regulation of intrinsic apoptotic      |       | 25/ | 0.03 | 0.03 |   |
| BP | 1902 signaling pathway in response to DNA           | 2/292 | 233 | 876  | 107  | 2 |
|    | 230 damage                                          |       | 28  | 746  | 566  |   |
|    | GO:                                                 |       | 60/ | 0.03 | 0.03 |   |
| BP | 0060 face development                               | 3/292 | 233 | 937  | 155  | 3 |
|    | 324                                                 |       | 28  | 999  | 295  |   |

|    |      |                                                                  |       |     |      |      |   |
|----|------|------------------------------------------------------------------|-------|-----|------|------|---|
|    | GO:  |                                                                  |       | 200 | 0.04 | 0.03 |   |
| BP | 1902 | positive regulation of supramolecular fiber organization         | 6/292 | /23 | 048  | 242  | 6 |
|    | 905  |                                                                  |       | 328 | 716  | 598  |   |
|    | GO:  |                                                                  |       | 103 | 0.04 | 0.03 |   |
| BP | 0090 | positive regulation of canonical Wnt signaling pathway           | 4/292 | /23 | 060  | 250  | 4 |
|    | 263  |                                                                  |       | 328 | 258  | 432  |   |
|    | GO:  |                                                                  |       | 61/ | 0.04 | 0.03 |   |
| BP | 0045 | negative regulation of innate immune response                    | 3/292 | 233 | 104  | 281  | 3 |
|    | 824  |                                                                  |       | 28  | 585  | 646  |   |
|    | GO:  |                                                                  |       | 61/ | 0.04 | 0.03 |   |
| BP | 0060 | inner ear receptor cell development                              | 3/292 | 233 | 104  | 281  | 3 |
|    | 119  |                                                                  |       | 28  | 585  | 646  |   |
|    | GO:  |                                                                  |       | 61/ | 0.04 | 0.03 |   |
| BP | 0061 | selective autophagy                                              | 3/292 | 233 | 104  | 281  | 3 |
|    | 912  |                                                                  |       | 28  | 585  | 646  |   |
|    | GO:  |                                                                  |       | 26/ | 0.04 | 0.03 |   |
| BP | 0006 | phosphate ion transport                                          | 2/292 | 233 | 165  | 315  | 2 |
|    | 817  |                                                                  |       | 28  | 826  | 75   |   |
|    | GO:  |                                                                  |       | 26/ | 0.04 | 0.03 |   |
| BP | 0009 | catechol-containing compound biosynthetic process                | 2/292 | 233 | 165  | 315  | 2 |
|    | 713  |                                                                  |       | 28  | 826  | 75   |   |
|    | GO:  |                                                                  |       | 26/ | 0.04 | 0.03 |   |
| BP | 0030 | adrenal gland development                                        | 2/292 | 233 | 165  | 315  | 2 |
|    | 325  |                                                                  |       | 28  | 826  | 75   |   |
|    | GO:  |                                                                  |       | 26/ | 0.04 | 0.03 |   |
| BP | 0042 | catecholamine biosynthetic process                               | 2/292 | 233 | 165  | 315  | 2 |
|    | 423  |                                                                  |       | 28  | 826  | 75   |   |
|    | GO:  |                                                                  |       | 26/ | 0.04 | 0.03 |   |
| BP | 0070 | negative regulation of biomineral tissue development             | 2/292 | 233 | 165  | 315  | 2 |
|    | 168  |                                                                  |       | 28  | 826  | 75   |   |
|    | GO:  |                                                                  |       | 26/ | 0.04 | 0.03 |   |
| BP | 0090 | positive regulation of release of cytochrome c from mitochondria | 2/292 | 233 | 165  | 315  | 2 |
|    | 200  |                                                                  |       | 28  | 826  | 75   |   |
|    | GO:  |                                                                  |       | 26/ | 0.04 | 0.03 |   |
| BP | 0097 | renal filtration                                                 | 2/292 | 233 | 165  | 315  | 2 |
|    | 205  |                                                                  |       | 28  | 826  | 75   |   |
|    | GO:  |                                                                  |       | 26/ | 0.04 | 0.03 |   |
| BP | 0110 | negative regulation of biomineralization                         | 2/292 | 233 | 165  | 315  | 2 |
|    | 150  |                                                                  |       | 28  | 826  | 75   |   |
|    | GO:  |                                                                  |       | 26/ | 0.04 | 0.03 |   |
| BP | 2000 | positive regulation of gene silencing by miRNA                   | 2/292 | 233 | 165  | 315  | 2 |
|    | 637  |                                                                  |       | 28  | 826  | 75   |   |

|    |                                                                |       |     |      |      |   |
|----|----------------------------------------------------------------|-------|-----|------|------|---|
|    | GO:                                                            |       | 26/ | 0.04 | 0.03 |   |
| BP | 2000 positive regulation of stem cell differentiation          | 2/292 | 233 | 165  | 315  | 2 |
|    | 738                                                            |       | 28  | 826  | 75   |   |
|    | GO:                                                            |       | 151 | 0.04 | 0.03 |   |
| BP | 0051 regulation of neurotransmitter transport                  | 5/292 | /23 | 167  | 315  | 5 |
|    | 588                                                            |       | 328 | 007  | 75   |   |
|    | GO:                                                            |       | 104 | 0.04 | 0.03 |   |
| BP | 0014 response to purine-containing compound                    | 4/292 | /23 | 182  | 322  | 4 |
|    | 074                                                            |       | 328 | 728  | 529  |   |
|    | GO:                                                            |       | 104 | 0.04 | 0.03 |   |
| BP | 0015 monoamine transport                                       | 4/292 | /23 | 182  | 322  | 4 |
|    | 844                                                            |       | 328 | 728  | 529  |   |
|    | GO:                                                            |       | 104 | 0.04 | 0.03 |   |
| BP | 0019 antibacterial humoral response                            | 4/292 | /23 | 182  | 322  | 4 |
|    | 731                                                            |       | 328 | 728  | 529  |   |
|    | GO:                                                            |       | 104 | 0.04 | 0.03 |   |
| BP | 0046 cellular transition metal ion homeostasis                 | 4/292 | /23 | 182  | 322  | 4 |
|    | 916                                                            |       | 328 | 728  | 529  |   |
|    | GO:                                                            |       | 202 | 0.04 | 0.03 |   |
| BP | 0048 appendage development                                     | 6/292 | /23 | 215  | 345  | 6 |
|    | 736                                                            |       | 328 | 213  | 453  |   |
|    | GO:                                                            |       | 202 | 0.04 | 0.03 |   |
| BP | 0060 limb development                                          | 6/292 | /23 | 215  | 345  | 6 |
|    | 173                                                            |       | 328 | 213  | 453  |   |
|    | GO:                                                            |       | 62/ | 0.04 | 0.03 |   |
| BP | 0003 ventricular cardiac muscle tissue development             | 3/292 | 233 | 274  | 386  | 3 |
|    | 229                                                            |       | 28  | 679  | 821  |   |
|    | GO:                                                            |       | 62/ | 0.04 | 0.03 |   |
| BP | 0050 regulation of antigen receptor-mediated signaling pathway | 3/292 | 233 | 274  | 386  | 3 |
|    | 854                                                            |       | 28  | 679  | 821  |   |
|    | GO:                                                            |       | 62/ | 0.04 | 0.03 |   |
| BP | 0050 detection of mechanical stimulus                          | 3/292 | 233 | 274  | 386  | 3 |
|    | 982                                                            |       | 28  | 679  | 821  |   |
|    | GO:                                                            |       | 62/ | 0.04 | 0.03 |   |
| BP | 0060 endochondral bone morphogenesis                           | 3/292 | 233 | 274  | 386  | 3 |
|    | 350                                                            |       | 28  | 679  | 821  |   |
|    | GO:                                                            |       | 105 | 0.04 | 0.03 |   |
| BP | 0045 positive regulation of exocytosis                         | 4/292 | /23 | 307  | 411  | 4 |
|    | 921                                                            |       | 328 | 272  | 18   |   |
|    | GO:                                                            |       | 106 | 0.04 | 0.03 |   |
| BP | 0006 aminoglycan metabolic process                             | 4/292 | /23 | 433  | 509  | 4 |
|    | 022                                                            |       | 328 | 888  | 949  |   |

|    |                                                                                      |       |     |      |      |   |
|----|--------------------------------------------------------------------------------------|-------|-----|------|------|---|
|    | GO:                                                                                  |       | 258 | 0.04 | 0.03 |   |
| BP | 0007 locomotory behavior                                                             | 7/292 | /23 | 439  | 512  | 7 |
|    | 626                                                                                  |       | 328 | 554  | 927  |   |
|    | GO:                                                                                  |       | 63/ | 0.04 | 0.03 |   |
| BP | 0001 heart looping                                                                   | 3/292 | 233 | 448  | 513  | 3 |
|    | 947                                                                                  |       | 28  | 258  | 186  |   |
|    | GO:                                                                                  |       | 63/ | 0.04 | 0.03 |   |
| BP | 0050 regulation of lipid catabolic process                                           | 3/292 | 233 | 448  | 513  | 3 |
|    | 994                                                                                  |       | 28  | 258  | 186  |   |
|    | GO:                                                                                  |       | 27/ | 0.04 | 0.03 |   |
| BP | 0002 glandular epithelial cell development                                           | 2/292 | 233 | 462  | 513  | 2 |
|    | 068                                                                                  |       | 28  | 728  | 186  |   |
|    | GO:                                                                                  |       | 27/ | 0.04 | 0.03 |   |
| BP | 0003 renal system process involved in regulation of systemic arterial blood pressure | 2/292 | 233 | 462  | 513  | 2 |
|    | 071                                                                                  |       | 28  | 728  | 186  |   |
|    | GO:                                                                                  |       | 27/ | 0.04 | 0.03 |   |
| BP | 0045 respiratory burst                                                               | 2/292 | 233 | 462  | 513  | 2 |
|    | 730                                                                                  |       | 28  | 728  | 186  |   |
|    | GO:                                                                                  |       | 27/ | 0.04 | 0.03 |   |
| BP | 0051 nitric-oxide synthase biosynthetic process                                      | 2/292 | 233 | 462  | 513  | 2 |
|    | 767                                                                                  |       | 28  | 728  | 186  |   |
|    | GO:                                                                                  |       | 27/ | 0.04 | 0.03 |   |
| BP | 0051 regulation of nitric-oxide synthase biosynthetic process                        | 2/292 | 233 | 462  | 513  | 2 |
|    | 769                                                                                  |       | 28  | 728  | 186  |   |
|    | GO:                                                                                  |       | 27/ | 0.04 | 0.03 |   |
| BP | 0060 positive regulation of posttranscriptional gene silencing                       | 2/292 | 233 | 462  | 513  | 2 |
|    | 148                                                                                  |       | 28  | 728  | 186  |   |
|    | GO:                                                                                  |       | 27/ | 0.04 | 0.03 |   |
| BP | 0071 hematopoietic stem cell proliferation                                           | 2/292 | 233 | 462  | 513  | 2 |
|    | 425                                                                                  |       | 28  | 728  | 186  |   |
|    | GO:                                                                                  |       | 27/ | 0.04 | 0.03 |   |
| BP | 0090 cochlea morphogenesis                                                           | 2/292 | 233 | 462  | 513  | 2 |
|    | 103                                                                                  |       | 28  | 728  | 186  |   |
|    | GO:                                                                                  |       | 27/ | 0.04 | 0.03 |   |
| BP | 1901 positive regulation of potassium ion transmembrane transporter activity         | 2/292 | 233 | 462  | 513  | 2 |
|    | 018                                                                                  |       | 28  | 728  | 186  |   |
|    | GO:                                                                                  |       | 27/ | 0.04 | 0.03 |   |
| BP | 1905 regulation of gonad development                                                 | 2/292 | 233 | 462  | 513  | 2 |
|    | 939                                                                                  |       | 28  | 728  | 186  |   |
|    | GO:                                                                                  |       | 154 | 0.04 | 0.03 |   |
| BP | 1901 fatty acid derivative metabolic process                                         | 5/292 | /23 | 469  | 517  | 5 |
|    | 568                                                                                  |       | 328 | 973  | 388  |   |

|    |                                                                       |       |     |      |      |   |
|----|-----------------------------------------------------------------------|-------|-----|------|------|---|
|    | GO:                                                                   |       | 206 | 0.04 | 0.03 |   |
| BP | 0060 skeletal muscle organ development                                | 6/292 | /23 | 560  | 587  | 6 |
|    | 538                                                                   |       | 328 | 997  | 199  |   |
|    | GO:                                                                   |       | 107 | 0.04 | 0.03 |   |
| BP | 0019 fatty acid oxidation                                             | 4/292 | /23 | 562  | 587  | 4 |
|    | 395                                                                   |       | 328 | 577  | 199  |   |
|    | GO:                                                                   |       | 64/ | 0.04 | 0.03 |   |
| BP | 0043 positive regulation of DNA binding                               | 3/292 | 233 | 625  | 630  | 3 |
|    | 388                                                                   |       | 28  | 303  | 328  |   |
|    | GO:                                                                   |       | 64/ | 0.04 | 0.03 |   |
| BP | 0046 polyol biosynthetic process                                      | 3/292 | 233 | 625  | 630  | 3 |
|    | 173                                                                   |       | 28  | 303  | 328  |   |
|    | GO:                                                                   |       | 64/ | 0.04 | 0.03 |   |
| BP | 0048 platelet-derived growth factor receptor signaling pathway        | 3/292 | 233 | 625  | 630  | 3 |
|    | 008                                                                   |       | 28  | 303  | 328  |   |
|    | GO:                                                                   |       | 64/ | 0.04 | 0.03 |   |
| BP | 0051 negative regulation of nuclear division                          | 3/292 | 233 | 625  | 630  | 3 |
|    | 784                                                                   |       | 28  | 303  | 328  |   |
|    | GO:                                                                   |       | 374 | 0.04 | 0.03 |   |
| BP | 0006 phospholipid metabolic process                                   | 9/292 | /23 | 675  | 668  | 9 |
|    | 644                                                                   |       | 328 | 526  | 187  |   |
|    | GO:                                                                   |       | 108 | 0.04 | 0.03 |   |
| BP | 0032 negative regulation of protein binding                           | 4/292 | /23 | 693  | 680  | 4 |
|    | 091                                                                   |       | 328 | 336  | 595  |   |
|    | GO:                                                                   |       | 28/ | 0.04 | 0.03 |   |
| BP | 0002 response to tumor cell                                           | 2/292 | 233 | 767  | 722  | 2 |
|    | 347                                                                   |       | 28  | 211  | 708  |   |
|    | GO:                                                                   |       | 28/ | 0.04 | 0.03 |   |
| BP | 0006 aminoglycan catabolic process                                    | 2/292 | 233 | 767  | 722  | 2 |
|    | 026                                                                   |       | 28  | 211  | 708  |   |
|    | GO:                                                                   |       | 28/ | 0.04 | 0.03 |   |
| BP | 0030 thyroid gland development                                        | 2/292 | 233 | 767  | 722  | 2 |
|    | 878                                                                   |       | 28  | 211  | 708  |   |
|    | GO:                                                                   |       | 28/ | 0.04 | 0.03 |   |
| BP | 0035 endodermal cell differentiation                                  | 2/292 | 233 | 767  | 722  | 2 |
|    | 987                                                                   |       | 28  | 211  | 708  |   |
|    | GO:                                                                   |       | 28/ | 0.04 | 0.03 |   |
| BP | 0045 positive regulation of natural killer cell mediated cytotoxicity | 2/292 | 233 | 767  | 722  | 2 |
|    | 954                                                                   |       | 28  | 211  | 708  |   |
|    | GO:                                                                   |       | 28/ | 0.04 | 0.03 |   |
| BP | 0051 positive regulation of meiotic cell cycle                        | 2/292 | 233 | 767  | 722  | 2 |
|    | 446                                                                   |       | 28  | 211  | 708  |   |

|    |      |                                              |       |      |      |     |   |
|----|------|----------------------------------------------|-------|------|------|-----|---|
|    | GO:  |                                              | 28/   | 0.04 | 0.03 |     |   |
| BP | 0060 | pericardium development                      | 2/292 | 233  | 767  | 722 | 2 |
|    | 039  |                                              |       | 28   | 211  | 708 |   |
|    | GO:  |                                              | 28/   | 0.04 | 0.03 |     |   |
| BP | 0060 | regulation of SMAD protein signal            | 2/292 | 233  | 767  | 722 | 2 |
|    | 390  | transduction                                 |       | 28   | 211  | 708 |   |
|    | GO:  |                                              | 28/   | 0.04 | 0.03 |     |   |
| BP | 1904 | excitatory synapse assembly                  | 2/292 | 233  | 767  | 722 | 2 |
|    | 861  |                                              |       | 28   | 211  | 708 |   |
|    | GO:  |                                              | 28/   | 0.04 | 0.03 |     |   |
| BP | 2000 | regulation of NMDA receptor activity         | 2/292 | 233  | 767  | 722 | 2 |
|    | 310  |                                              |       | 28   | 211  | 708 |   |
|    | GO:  |                                              | 65/   | 0.04 | 0.03 |     |   |
| BP | 0032 | positive regulation of actin filament bundle | 3/292 | 233  | 805  | 749 | 3 |
|    | 233  | assembly                                     |       | 28   | 788  | 659 |   |
|    | GO:  |                                              | 65/   | 0.04 | 0.03 |     |   |
| BP | 0042 | tissue regeneration                          | 3/292 | 233  | 805  | 749 | 3 |
|    | 246  |                                              |       | 28   | 788  | 659 |   |
|    | GO:  |                                              | 109   | 0.04 | 0.03 |     |   |
| BP | 0035 | synaptic transmission, glutamatergic         | 4/292 | /23  | 826  | 763 | 4 |
|    | 249  |                                              |       | 328  | 162  | 964 |   |
|    | GO:  |                                              | 110   | 0.04 | 0.03 |     |   |
| BP | 0017 | regulation of transforming growth factor     | 4/292 | /23  | 961  | 865 | 4 |
|    | 015  | beta receptor signaling pathway              |       | 328  | 054  | 899 |   |
|    | GO:  |                                              | 110   | 0.04 | 0.03 |     |   |
| BP | 0035 | cellular response to topologically incorrect | 4/292 | /23  | 961  | 865 | 4 |
|    | 967  | protein                                      |       | 328  | 054  | 899 |   |
|    | GO:  |                                              | 66/   | 0.04 | 0.03 |     |   |
| BP | 0042 | amyloid precursor protein metabolic process  | 3/292 | 233  | 989  | 886 | 3 |
|    | 982  |                                              |       | 28   | 689  | 572 |   |
|    | GO:  |                                              | 379   | 0.05 | 0.03 |     |   |
| BP | 0003 | regionalization                              | 9/292 | /23  | 006  | 897 | 9 |
|    | 002  |                                              |       | 328  | 266  | 839 |   |
|    | GO:  |                                              | 29/   | 0.05 | 0.03 |     |   |
| BP | 0002 | desensitization of G protein-coupled         | 2/292 | 233  | 079  | 936 | 2 |
|    | 029  | receptor signaling pathway                   |       | 28   | 042  | 232 |   |
|    | GO:  |                                              | 29/   | 0.05 | 0.03 |     |   |
| BP | 0002 | positive regulation of natural killer cell   | 2/292 | 233  | 079  | 936 | 2 |
|    | 717  | mediated immunity                            |       | 28   | 042  | 232 |   |
|    | GO:  |                                              | 29/   | 0.05 | 0.03 |     |   |
| BP | 0003 | endochondral bone growth                     | 2/292 | 233  | 079  | 936 | 2 |
|    | 416  |                                              |       | 28   | 042  | 232 |   |

|    |      |                                                                             |       |     |      |      |   |
|----|------|-----------------------------------------------------------------------------|-------|-----|------|------|---|
|    | GO:  |                                                                             |       | 29/ | 0.05 | 0.03 |   |
| BP | 0010 | positive regulation of peptidyl-threonine phosphorylation                   | 2/292 | 233 | 079  | 936  | 2 |
|    | 800  |                                                                             |       | 28  | 042  | 232  |   |
|    | GO:  |                                                                             |       | 29/ | 0.05 | 0.03 |   |
| BP | 0021 | central nervous system projection neuron axonogenesis                       | 2/292 | 233 | 079  | 936  | 2 |
|    | 952  |                                                                             |       | 28  | 042  | 232  |   |
|    | GO:  |                                                                             |       | 29/ | 0.05 | 0.03 |   |
| BP | 0022 | negative adaptation of signaling pathway                                    | 2/292 | 233 | 079  | 936  | 2 |
|    | 401  |                                                                             |       | 28  | 042  | 232  |   |
|    | GO:  |                                                                             |       | 29/ | 0.05 | 0.03 |   |
| BP | 0030 | melanocyte differentiation                                                  | 2/292 | 233 | 079  | 936  | 2 |
|    | 318  |                                                                             |       | 28  | 042  | 232  |   |
|    | GO:  |                                                                             |       | 29/ | 0.05 | 0.03 |   |
| BP | 0042 | thyroid hormone metabolic process                                           | 2/292 | 233 | 079  | 936  | 2 |
|    | 403  |                                                                             |       | 28  | 042  | 232  |   |
|    | GO:  |                                                                             |       | 29/ | 0.05 | 0.03 |   |
| BP | 0045 | negative regulation of heart contraction                                    | 2/292 | 233 | 079  | 936  | 2 |
|    | 822  |                                                                             |       | 28  | 042  | 232  |   |
|    | GO:  |                                                                             |       | 29/ | 0.05 | 0.03 |   |
| BP | 0061 | cell surface receptor signaling pathway involved in heart development       | 2/292 | 233 | 079  | 936  | 2 |
|    | 311  |                                                                             |       | 28  | 042  | 232  |   |
|    | GO:  |                                                                             |       | 29/ | 0.05 | 0.03 |   |
| BP | 0071 | cellular response to interleukin-4                                          | 2/292 | 233 | 079  | 936  | 2 |
|    | 353  |                                                                             |       | 28  | 042  | 232  |   |
|    | GO:  |                                                                             |       | 111 | 0.05 | 0.03 |   |
| BP | 0016 | regulation of macroautophagy                                                | 4/292 | /23 | 098  | 949  | 4 |
|    | 241  |                                                                             |       | 328 | 007  | 271  |   |
|    | GO:  |                                                                             |       | 67/ | 0.05 | 0.04 |   |
| BP | 0010 | positive regulation of cellular carbohydrate metabolic process              | 3/292 | 233 | 176  | 007  | 3 |
|    | 676  |                                                                             |       | 28  | 981  | 086  |   |
|    | GO:  |                                                                             |       | 67/ | 0.05 | 0.04 |   |
| BP | 2000 | negative regulation of reproductive process                                 | 3/292 | 233 | 176  | 007  | 3 |
|    | 242  |                                                                             |       | 28  | 981  | 086  |   |
|    | GO:  |                                                                             |       | 112 | 0.05 | 0.04 |   |
| BP | 1903 | regulation of cellular response to transforming growth factor beta stimulus | 4/292 | /23 | 237  | 051  | 4 |
|    | 844  |                                                                             |       | 328 | 019  | 856  |   |
|    | GO:  |                                                                             |       | 214 | 0.05 | 0.04 |   |
| BP | 0010 | regulation of cell-substrate adhesion                                       | 6/292 | /23 | 304  | 102  | 6 |
|    | 810  |                                                                             |       | 328 | 244  | 149  |   |
|    | GO:  |                                                                             |       | 68/ | 0.05 | 0.04 |   |
| BP | 0097 | execution phase of apoptosis                                                | 3/292 | 233 | 367  | 147  | 3 |
|    | 194  |                                                                             |       | 28  | 637  | 698  |   |

|    |      |                                                                             |       |      |      |       |
|----|------|-----------------------------------------------------------------------------|-------|------|------|-------|
|    | GO:  |                                                                             | 68/   | 0.05 | 0.04 |       |
| BP | 0099 | regulation of neurotransmitter receptor activity                            | 3/292 | 233  | 367  | 147 3 |
|    | 601  |                                                                             |       | 28   | 637  | 698   |
|    | GO:  |                                                                             | 30/   | 0.05 | 0.04 |       |
| BP | 0001 | lymph vessel development                                                    | 2/292 | 233  | 397  | 155 2 |
|    | 945  |                                                                             |       | 28   | 989  | 491   |
|    | GO:  |                                                                             | 30/   | 0.05 | 0.04 |       |
| BP | 0003 | type B pancreatic cell differentiation                                      | 2/292 | 233  | 397  | 155 2 |
|    | 309  |                                                                             |       | 28   | 989  | 491   |
|    | GO:  |                                                                             | 30/   | 0.05 | 0.04 |       |
| BP | 0006 | substrate-dependent cell migration                                          | 2/292 | 233  | 397  | 155 2 |
|    | 929  |                                                                             |       | 28   | 989  | 491   |
|    | GO:  |                                                                             | 30/   | 0.05 | 0.04 |       |
| BP | 0021 | cranial nerve morphogenesis                                                 | 2/292 | 233  | 397  | 155 2 |
|    | 602  |                                                                             |       | 28   | 989  | 491   |
|    | GO:  |                                                                             | 30/   | 0.05 | 0.04 |       |
| BP | 0030 | regulation of vascular endothelial growth factor receptor signaling pathway | 2/292 | 233  | 397  | 155 2 |
|    | 947  |                                                                             |       | 28   | 989  | 491   |
|    | GO:  |                                                                             | 30/   | 0.05 | 0.04 |       |
| BP | 0032 | positive regulation of natural killer cell activation                       | 2/292 | 233  | 397  | 155 2 |
|    | 816  |                                                                             |       | 28   | 989  | 491   |
|    | GO:  |                                                                             | 30/   | 0.05 | 0.04 |       |
| BP | 0048 | negative regulation of behavior                                             | 2/292 | 233  | 397  | 155 2 |
|    | 521  |                                                                             |       | 28   | 989  | 491   |
|    | GO:  |                                                                             | 30/   | 0.05 | 0.04 |       |
| BP | 0048 | positive regulation of oligodendrocyte differentiation                      | 2/292 | 233  | 397  | 155 2 |
|    | 714  |                                                                             |       | 28   | 989  | 491   |
|    | GO:  |                                                                             | 30/   | 0.05 | 0.04 |       |
| BP | 0050 | positive regulation of lipid catabolic process                              | 2/292 | 233  | 397  | 155 2 |
|    | 996  |                                                                             |       | 28   | 989  | 491   |
|    | GO:  |                                                                             | 163   | 0.05 | 0.04 |       |
| BP | 0006 | striated muscle contraction                                                 | 5/292 | /23  | 456  | 198 5 |
|    | 941  |                                                                             |       | 328  | 166  | 525   |
|    | GO:  |                                                                             | 216   | 0.05 | 0.04 |       |
| BP | 0035 | multicellular organism growth                                               | 6/292 | /23  | 500  | 231 6 |
|    | 264  |                                                                             |       | 328  | 908  | 189   |
|    | GO:  |                                                                             | 114   | 0.05 | 0.04 |       |
| BP | 0034 | lipid oxidation                                                             | 4/292 | /23  | 521  | 245 4 |
|    | 440  |                                                                             |       | 328  | 199  | 027   |
|    | GO:  |                                                                             | 69/   | 0.05 | 0.04 |       |
| BP | 0009 | embryonic pattern specification                                             | 3/292 | 233  | 561  | 270 3 |
|    | 880  |                                                                             |       | 28   | 631  | 775   |



|    |                                                      |       |     |      |      |   |
|----|------------------------------------------------------|-------|-----|------|------|---|
|    | GO:                                                  |       | 69/ | 0.05 | 0.04 |   |
| BP | 0048 regulation of neuronal synaptic plasticity      | 3/292 | 233 | 561  | 270  | 3 |
|    | 168                                                  |       | 28  | 631  | 775  |   |
|    | GO:                                                  |       | 69/ | 0.05 | 0.04 |   |
| BP | 0061 determination of heart left/right asymmetry     | 3/292 | 233 | 561  | 270  | 3 |
|    | 371                                                  |       | 28  | 631  | 775  |   |
|    | GO:                                                  |       | 115 | 0.05 | 0.04 |   |
| BP | 0019 polyol metabolic process                        | 4/292 | /23 | 666  | 347  | 4 |
|    | 751                                                  |       | 328 | 359  | 577  |   |
|    | GO:                                                  |       | 115 | 0.05 | 0.04 |   |
| BP | 0048 regulation of receptor-mediated endocytosis     | 4/292 | /23 | 666  | 347  | 4 |
|    | 259                                                  |       | 328 | 359  | 577  |   |
|    | GO:                                                  |       | 389 | 0.05 | 0.04 |   |
| BP | 0006 exocytosis                                      | 9/292 | /23 | 713  | 371  | 9 |
|    | 887                                                  |       | 328 | 206  | 676  |   |
|    | GO:                                                  |       | 31/ | 0.05 | 0.04 |   |
| BP | 0001 synaptic transmission, dopaminergic             | 2/292 | 233 | 723  | 371  | 2 |
|    | 963                                                  |       | 28  | 828  | 676  |   |
|    | GO:                                                  |       | 31/ | 0.05 | 0.04 |   |
| BP | 0002 regulation of the force of heart contraction    | 2/292 | 233 | 723  | 371  | 2 |
|    | 026                                                  |       | 28  | 828  | 676  |   |
|    | GO:                                                  |       | 31/ | 0.05 | 0.04 |   |
| BP | 0002 chondrocyte development                         | 2/292 | 233 | 723  | 371  | 2 |
|    | 063                                                  |       | 28  | 828  | 676  |   |
|    | GO:                                                  |       | 31/ | 0.05 | 0.04 |   |
| BP | 0002 positive regulation of receptor internalization | 2/292 | 233 | 723  | 371  | 2 |
|    | 092                                                  |       | 28  | 828  | 676  |   |
|    | GO:                                                  |       | 31/ | 0.05 | 0.04 |   |
| BP | 0023 adaptation of signaling pathway                 | 2/292 | 233 | 723  | 371  | 2 |
|    | 058                                                  |       | 28  | 828  | 676  |   |
|    | GO:                                                  |       | 31/ | 0.05 | 0.04 |   |
| BP | 0044 wound healing, spreading of cells               | 2/292 | 233 | 723  | 371  | 2 |
|    | 319                                                  |       | 28  | 828  | 676  |   |
|    | GO:                                                  |       | 31/ | 0.05 | 0.04 |   |
| BP | 0048 neurotrophin TRK receptor signaling             | 2/292 | 233 | 723  | 371  | 2 |
|    | 011 pathway                                          |       | 28  | 828  | 676  |   |
|    | GO:                                                  |       | 31/ | 0.05 | 0.04 |   |
| BP | 0070 response to interleukin-4                       | 2/292 | 233 | 723  | 371  | 2 |
|    | 670                                                  |       | 28  | 828  | 676  |   |
|    | GO:                                                  |       | 31/ | 0.05 | 0.04 |   |
| BP | 0090 epiboly involved in wound healing               | 2/292 | 233 | 723  | 371  | 2 |
|    | 505                                                  |       | 28  | 828  | 676  |   |

|    |                                                                      |       |     |      |      |   |
|----|----------------------------------------------------------------------|-------|-----|------|------|---|
|    | GO:                                                                  |       | 31/ | 0.05 | 0.04 |   |
| BP | 1900 regulation of execution phase of apoptosis                      | 2/292 | 233 | 723  | 371  | 2 |
|    | 117                                                                  |       | 28  | 828  | 676  |   |
|    | GO:                                                                  |       | 70/ | 0.05 | 0.04 |   |
| BP | 0003 embryonic heart tube morphogenesis                              | 3/292 | 233 | 758  | 396  | 3 |
|    | 143                                                                  |       | 28  | 932  | 668  |   |
|    | GO:                                                                  |       | 166 | 0.05 | 0.04 |   |
| BP | 0007 female pregnancy                                                | 5/292 | /23 | 810  | 432  | 5 |
|    | 565                                                                  |       | 328 | 739  | 869  |   |
|    | GO:                                                                  |       | 116 | 0.05 | 0.04 |   |
| BP | 0009 response to toxic substance                                     | 4/292 | /23 | 813  | 432  | 4 |
|    | 636                                                                  |       | 328 | 558  | 869  |   |
|    | GO:                                                                  |       | 116 | 0.05 | 0.04 |   |
| BP | 0043 regulation of RNA stability                                     | 4/292 | /23 | 813  | 432  | 4 |
|    | 487                                                                  |       | 328 | 558  | 869  |   |
|    | GO:                                                                  |       | 167 | 0.05 | 0.04 |   |
| BP | 0051 negative regulation of binding                                  | 5/292 | /23 | 931  | 519  | 5 |
|    | 100                                                                  |       | 328 | 8    | 295  |   |
|    | GO:                                                                  |       | 167 | 0.05 | 0.04 |   |
| BP | 2001 regulation of intrinsic apoptotic signaling pathway             | 5/292 | /23 | 931  | 519  | 5 |
|    | 242                                                                  |       | 328 | 8    | 295  |   |
|    | GO:                                                                  |       | 71/ | 0.05 | 0.04 |   |
| BP | 0043 negative regulation of MAP kinase activity                      | 3/292 | 233 | 959  | 535  | 3 |
|    | 407                                                                  |       | 28  | 513  | 415  |   |
|    | GO:                                                                  |       | 117 | 0.05 | 0.04 |   |
| BP | 0006 response to unfolded protein                                    | 4/292 | /23 | 962  | 535  | 4 |
|    | 986                                                                  |       | 328 | 789  | 415  |   |
|    | GO:                                                                  |       | 117 | 0.05 | 0.04 |   |
| BP | 0071 negative regulation of protein serine/threonine kinase activity | 4/292 | /23 | 962  | 535  | 4 |
|    | 901                                                                  |       | 328 | 789  | 415  |   |
|    | GO:                                                                  |       | 117 | 0.05 | 0.04 |   |
| BP | 1901 positive regulation of cell junction assembly                   | 4/292 | /23 | 962  | 535  | 4 |
|    | 890                                                                  |       | 328 | 789  | 415  |   |
|    | GO:                                                                  |       | 32/ | 0.06 | 0.04 |   |
| BP | 0002 regulation of B cell apoptotic process                          | 2/292 | 233 | 056  | 583  | 2 |
|    | 902                                                                  |       | 28  | 337  | 895  |   |
|    | GO:                                                                  |       | 32/ | 0.06 | 0.04 |   |
| BP | 0032 negative regulation of interleukin-1 production                 | 2/292 | 233 | 056  | 583  | 2 |
|    | 692                                                                  |       | 28  | 337  | 895  |   |
|    | GO:                                                                  |       | 32/ | 0.06 | 0.04 |   |
| BP | 0032 positive regulation of interleukin-2 production                 | 2/292 | 233 | 056  | 583  | 2 |
|    | 743                                                                  |       | 28  | 337  | 895  |   |

|    |                                                  |       |     |      |      |   |
|----|--------------------------------------------------|-------|-----|------|------|---|
|    | GO:                                              |       | 32/ | 0.06 | 0.04 |   |
| BP | 0032 inositol phosphate biosynthetic process     | 2/292 | 233 | 056  | 583  | 2 |
|    | 958                                              |       | 28  | 337  | 895  |   |
|    | GO:                                              |       | 32/ | 0.06 | 0.04 |   |
| BP | 0035 positive regulation of histone acetylation  | 2/292 | 233 | 056  | 583  | 2 |
|    | 066                                              |       | 28  | 337  | 895  |   |
|    | GO:                                              |       | 32/ | 0.06 | 0.04 |   |
| BP | 0040 regulation of fibroblast growth factor      | 2/292 | 233 | 056  | 583  | 2 |
|    | 036 receptor signaling pathway                   |       | 28  | 337  | 895  |   |
|    | GO:                                              |       | 32/ | 0.06 | 0.04 |   |
| BP | 0042 regulation of circadian sleep/wake cycle    | 2/292 | 233 | 056  | 583  | 2 |
|    | 749                                              |       | 28  | 337  | 895  |   |
|    | GO:                                              |       | 32/ | 0.06 | 0.04 |   |
| BP | 0050 arachidonic acid secretion                  | 2/292 | 233 | 056  | 583  | 2 |
|    | 482                                              |       | 28  | 337  | 895  |   |
|    | GO:                                              |       | 32/ | 0.06 | 0.04 |   |
| BP | 0071 cellular response to interleukin-6          | 2/292 | 233 | 056  | 583  | 2 |
|    | 354                                              |       | 28  | 337  | 895  |   |
|    | GO:                                              |       | 32/ | 0.06 | 0.04 |   |
| BP | 0090 epiboly                                     | 2/292 | 233 | 056  | 583  | 2 |
|    | 504                                              |       | 28  | 337  | 895  |   |
|    | GO:                                              |       | 32/ | 0.06 | 0.04 |   |
| BP | 1903 arachidonate transport                      | 2/292 | 233 | 056  | 583  | 2 |
|    | 963                                              |       | 28  | 337  | 895  |   |
|    | GO:                                              |       | 32/ | 0.06 | 0.04 |   |
| BP | 2000 negative regulation of CD4-positive, alpha- | 2/292 | 233 | 056  | 583  | 2 |
|    | 515 beta T cell activation                       |       | 28  | 337  | 895  |   |
|    | GO:                                              |       | 222 | 0.06 | 0.04 |   |
| BP | 0060 bone development                            | 6/292 | /23 | 117  | 627  | 6 |
|    | 348                                              |       | 328 | 096  | 984  |   |
|    | GO:                                              |       | 72/ | 0.06 | 0.04 |   |
| BP | 0048 antigen processing and presentation of      | 3/292 | 233 | 163  | 661  | 3 |
|    | 002 peptide antigen                              |       | 28  | 343  | 061  |   |
|    | GO:                                              |       | 169 | 0.06 | 0.04 |   |
| BP | 0071 DNA biosynthetic process                    | 5/292 | /23 | 178  | 670  | 5 |
|    | 897                                              |       | 328 | 224  | 401  |   |
|    | GO:                                              |       | 223 | 0.06 | 0.04 |   |
| BP | 0016 organic acid catabolic process              | 6/292 | /23 | 223  | 700  | 6 |
|    | 054                                              |       | 328 | 622  | 868  |   |
|    | GO:                                              |       | 223 | 0.06 | 0.04 |   |
| BP | 0046 carboxylic acid catabolic process           | 6/292 | /23 | 223  | 700  | 6 |
|    | 395                                              |       | 328 | 622  | 868  |   |

|    |                                                                         |       |     |      |      |   |
|----|-------------------------------------------------------------------------|-------|-----|------|------|---|
|    | GO:                                                                     |       | 119 | 0.06 | 0.04 |   |
| BP | 0001 regulation of cell-matrix adhesion                                 | 4/292 | /23 | 267  | 731  | 4 |
|    | 952                                                                     |       | 328 | 326  | 942  |   |
|    | GO:                                                                     |       | 73/ | 0.06 | 0.04 |   |
| BP | 0021 forebrain neuron differentiation                                   | 3/292 | 233 | 370  | 805  | 3 |
|    | 879                                                                     |       | 28  | 392  | 825  |   |
|    | GO:                                                                     |       | 73/ | 0.06 | 0.04 |   |
| BP | 0043 response to estrogen                                               | 3/292 | 233 | 370  | 805  | 3 |
|    | 627                                                                     |       | 28  | 392  | 825  |   |
|    | GO:                                                                     |       | 33/ | 0.06 | 0.04 |   |
| BP | 0000 activation of MAPKK activity                                       | 2/292 | 233 | 395  | 806  | 2 |
|    | 186                                                                     |       | 28  | 299  | 928  |   |
|    | GO:                                                                     |       | 33/ | 0.06 | 0.04 |   |
| BP | 0021 forebrain neuron development                                       | 2/292 | 233 | 395  | 806  | 2 |
|    | 884                                                                     |       | 28  | 299  | 928  |   |
|    | GO:                                                                     |       | 33/ | 0.06 | 0.04 |   |
| BP | 0032 negative regulation of lipid transport                             | 2/292 | 233 | 395  | 806  | 2 |
|    | 369                                                                     |       | 28  | 299  | 928  |   |
|    | GO:                                                                     |       | 33/ | 0.06 | 0.04 |   |
| BP | 0032 positive regulation of cytokinesis                                 | 2/292 | 233 | 395  | 806  | 2 |
|    | 467                                                                     |       | 28  | 299  | 928  |   |
|    | GO:                                                                     |       | 33/ | 0.06 | 0.04 |   |
| BP | 0045 regulation of keratinocyte differentiation                         | 2/292 | 233 | 395  | 806  | 2 |
|    | 616                                                                     |       | 28  | 299  | 928  |   |
|    | GO:                                                                     |       | 33/ | 0.06 | 0.04 |   |
| BP | 0048 sperm capacitation                                                 | 2/292 | 233 | 395  | 806  | 2 |
|    | 240                                                                     |       | 28  | 299  | 928  |   |
|    | GO:                                                                     |       | 33/ | 0.06 | 0.04 |   |
| BP | 0048 embryonic digestive tract development                              | 2/292 | 233 | 395  | 806  | 2 |
|    | 566                                                                     |       | 28  | 299  | 928  |   |
|    | GO:                                                                     |       | 33/ | 0.06 | 0.04 |   |
| BP | 0060 cell differentiation involved in embryonic<br>placenta development | 2/292 | 233 | 395  | 806  | 2 |
|    | 706                                                                     |       | 28  | 299  | 928  |   |
|    | GO:                                                                     |       | 33/ | 0.06 | 0.04 |   |
| BP | 0070 necroptotic process                                                | 2/292 | 233 | 395  | 806  | 2 |
|    | 266                                                                     |       | 28  | 299  | 928  |   |
|    | GO:                                                                     |       | 120 | 0.06 | 0.04 |   |
| BP | 0006 pyruvate metabolic process                                         | 4/292 | /23 | 422  | 825  | 4 |
|    | 090                                                                     |       | 328 | 618  | 497  |   |
|    | GO:                                                                     |       | 171 | 0.06 | 0.04 |   |
| BP | 0030 regulation of actin filament polymerization                        | 5/292 | /23 | 430  | 827  | 5 |
|    | 833                                                                     |       | 328 | 372  | 392  |   |

|    |                                               |       |     |      |      |   |
|----|-----------------------------------------------|-------|-----|------|------|---|
|    | GO:                                           |       | 171 | 0.06 | 0.04 |   |
| BP | 0030 hindbrain development                    | 5/292 | /23 | 430  | 827  | 5 |
|    | 902                                           |       | 328 | 372  | 392  |   |
|    | GO:                                           |       | 74/ | 0.06 | 0.04 |   |
| BP | 0021 hippocampus development                  | 3/292 | 233 | 580  | 938  | 3 |
|    | 766                                           |       | 28  | 627  | 181  |   |
|    | GO: negative regulation of transmembrane      |       | 122 | 0.06 | 0.05 |   |
| BP | 0090 receptor protein serine/threonine kinase | 4/292 | /23 | 739  | 049  | 4 |
|    | 101 signaling pathway                         |       | 328 | 209  | 939  |   |
|    | GO:                                           |       | 34/ | 0.06 | 0.05 |   |
| BP | 0035 enteroendocrine cell differentiation     | 2/292 | 233 | 740  | 049  | 2 |
|    | 883                                           |       | 28  | 502  | 939  |   |
|    | GO: positive regulation of cAMP-mediated      |       | 34/ | 0.06 | 0.05 |   |
| BP | 0043 signaling                                | 2/292 | 233 | 740  | 049  | 2 |
|    | 950                                           |       | 28  | 502  | 939  |   |
|    | GO:                                           |       | 34/ | 0.06 | 0.05 |   |
| BP | 0070 response to interleukin-6                | 2/292 | 233 | 740  | 049  | 2 |
|    | 741                                           |       | 28  | 502  | 939  |   |
|    | GO:                                           |       | 75/ | 0.06 | 0.05 |   |
| BP | 0034 homotypic cell-cell adhesion             | 3/292 | 233 | 794  | 087  | 3 |
|    | 109                                           |       | 28  | 017  | 966  |   |
|    | GO:                                           |       | 229 | 0.06 | 0.05 |   |
| BP | 0016 protein processing                       | 6/292 | /23 | 885  | 154  | 6 |
|    | 485                                           |       | 328 | 753  | 575  |   |
|    | GO:                                           |       | 76/ | 0.07 | 0.05 |   |
| BP | 0000 polysaccharide biosynthetic process      | 3/292 | 233 | 010  | 245  | 3 |
|    | 271                                           |       | 28  | 528  | 851  |   |
|    | GO:                                           |       | 35/ | 0.07 | 0.05 |   |
| BP | 0001 gastrulation with mouth forming second   | 2/292 | 233 | 091  | 283  | 2 |
|    | 702                                           |       | 28  | 738  | 053  |   |
|    | GO:                                           |       | 35/ | 0.07 | 0.05 |   |
| BP | 0002 neutrophil mediated immunity             | 2/292 | 233 | 091  | 283  | 2 |
|    | 446                                           |       | 28  | 738  | 053  |   |
|    | GO:                                           |       | 35/ | 0.07 | 0.05 |   |
| BP | 0003 respiratory system process               | 2/292 | 233 | 091  | 283  | 2 |
|    | 016                                           |       | 28  | 738  | 053  |   |
|    | GO:                                           |       | 35/ | 0.07 | 0.05 |   |
| BP | 0006 DNA catabolic process                    | 2/292 | 233 | 091  | 283  | 2 |
|    | 308                                           |       | 28  | 738  | 053  |   |
|    | GO: negative regulation of toll-like receptor |       | 35/ | 0.07 | 0.05 |   |
| BP | 0034 signaling pathway                        | 2/292 | 233 | 091  | 283  | 2 |
|    | 122                                           |       | 28  | 738  | 053  |   |

|    |      |                                                                   |       |     |      |      |   |
|----|------|-------------------------------------------------------------------|-------|-----|------|------|---|
|    | GO:  |                                                                   |       | 35/ | 0.07 | 0.05 |   |
| BP | 0035 | positive regulation of Rho protein signal transduction            | 2/292 | 233 | 091  | 283  | 2 |
|    | 025  |                                                                   |       | 28  | 738  | 053  |   |
|    | GO:  |                                                                   |       | 35/ | 0.07 | 0.05 |   |
| BP | 0043 | positive regulation of leukocyte degranulation                    | 2/292 | 233 | 091  | 283  | 2 |
|    | 302  |                                                                   |       | 28  | 738  | 053  |   |
|    | GO:  |                                                                   |       | 35/ | 0.07 | 0.05 |   |
| BP | 0046 | response to cadmium ion                                           | 2/292 | 233 | 091  | 283  | 2 |
|    | 686  |                                                                   |       | 28  | 738  | 053  |   |
|    | GO:  |                                                                   |       | 35/ | 0.07 | 0.05 |   |
| BP | 0060 | regulation of mitotic spindle organization                        | 2/292 | 233 | 091  | 283  | 2 |
|    | 236  |                                                                   |       | 28  | 738  | 053  |   |
|    | GO:  |                                                                   |       | 35/ | 0.07 | 0.05 |   |
| BP | 1902 | regulation of amyloid-beta formation                              | 2/292 | 233 | 091  | 283  | 2 |
|    | 003  |                                                                   |       | 28  | 738  | 053  |   |
|    | GO:  |                                                                   |       | 35/ | 0.07 | 0.05 |   |
| BP | 1903 | regulation of cell maturation                                     | 2/292 | 233 | 091  | 283  | 2 |
|    | 429  |                                                                   |       | 28  | 738  | 053  |   |
|    | GO:  |                                                                   |       | 77/ | 0.07 | 0.05 |   |
| BP | 0045 | negative regulation of striated muscle tissue development         | 3/292 | 233 | 230  | 381  | 3 |
|    | 843  |                                                                   |       | 28  | 127  | 802  |   |
|    | GO:  |                                                                   |       | 77/ | 0.07 | 0.05 |   |
| BP | 0071 | cellular response to calcium ion                                  | 3/292 | 233 | 230  | 381  | 3 |
|    | 277  |                                                                   |       | 28  | 127  | 802  |   |
|    | GO:  |                                                                   |       | 36/ | 0.07 | 0.05 |   |
| BP | 0035 | aorta morphogenesis                                               | 2/292 | 233 | 448  | 518  | 2 |
|    | 909  |                                                                   |       | 28  | 802  | 595  |   |
|    | GO:  |                                                                   |       | 36/ | 0.07 | 0.05 |   |
| BP | 0042 | circadian sleep/wake cycle                                        | 2/292 | 233 | 448  | 518  | 2 |
|    | 745  |                                                                   |       | 28  | 802  | 595  |   |
|    | GO:  |                                                                   |       | 36/ | 0.07 | 0.05 |   |
| BP | 0048 | regulation of long-term neuronal synaptic plasticity              | 2/292 | 233 | 448  | 518  | 2 |
|    | 169  |                                                                   |       | 28  | 802  | 595  |   |
|    | GO:  |                                                                   |       | 36/ | 0.07 | 0.05 |   |
| BP | 0048 | regulation of axon regeneration                                   | 2/292 | 233 | 448  | 518  | 2 |
|    | 679  |                                                                   |       | 28  | 802  | 595  |   |
|    | GO:  |                                                                   |       | 36/ | 0.07 | 0.05 |   |
| BP | 0060 | cartilage development involved in endochondral bone morphogenesis | 2/292 | 233 | 448  | 518  | 2 |
|    | 351  |                                                                   |       | 28  | 802  | 595  |   |
|    | GO:  |                                                                   |       | 36/ | 0.07 | 0.05 |   |
| BP | 0071 | cellular response to fatty acid                                   | 2/292 | 233 | 448  | 518  | 2 |
|    | 398  |                                                                   |       | 28  | 802  | 595  |   |

|    |      |                                                                |       |     |      |      |   |
|----|------|----------------------------------------------------------------|-------|-----|------|------|---|
|    | GO:  |                                                                |       | 36/ | 0.07 | 0.05 |   |
| BP | 2000 | positive regulation of peptidyl-lysine acetylation             | 2/292 | 233 | 448  | 518  | 2 |
|    | 758  |                                                                |       | 28  | 802  | 595  |   |
|    | GO:  |                                                                |       | 78/ | 0.07 | 0.05 |   |
| BP | 0002 | columnar/cuboidal epithelial cell development                  | 3/292 | 233 | 452  | 518  | 3 |
|    | 066  |                                                                |       | 28  | 78   | 595  |   |
|    | GO:  |                                                                |       | 78/ | 0.07 | 0.05 |   |
| BP | 0032 | negative regulation of NF-kappaB transcription factor activity | 3/292 | 233 | 452  | 518  | 3 |
|    | 088  |                                                                |       | 28  | 78   | 595  |   |
|    | GO:  |                                                                |       | 78/ | 0.07 | 0.05 |   |
| BP | 0060 | neuroepithelial cell differentiation                           | 3/292 | 233 | 452  | 518  | 3 |
|    | 563  |                                                                |       | 28  | 78   | 595  |   |
|    | GO:  |                                                                |       | 78/ | 0.07 | 0.05 |   |
| BP | 0060 | coronary vasculature development                               | 3/292 | 233 | 452  | 518  | 3 |
|    | 976  |                                                                |       | 28  | 78   | 595  |   |
|    | GO:  |                                                                |       | 78/ | 0.07 | 0.05 |   |
| BP | 0070 | negative regulation of ERK1 and ERK2 cascade                   | 3/292 | 233 | 452  | 518  | 3 |
|    | 373  |                                                                |       | 28  | 78   | 595  |   |
|    | GO:  |                                                                |       | 78/ | 0.07 | 0.05 |   |
| BP | 0072 | intrinsic apoptotic signaling pathway by p53 class mediator    | 3/292 | 233 | 452  | 518  | 3 |
|    | 332  |                                                                |       | 28  | 78   | 595  |   |
|    | GO:  |                                                                |       | 234 | 0.07 | 0.05 |   |
| BP | 0006 | sodium ion transport                                           | 6/292 | /23 | 467  | 527  | 6 |
|    | 814  |                                                                |       | 328 | 581  | 337  |   |
|    | GO:  |                                                                |       | 293 | 0.07 | 0.05 |   |
| BP | 0051 | protein polymerization                                         | 7/292 | /23 | 643  | 655  | 7 |
|    | 258  |                                                                |       | 328 | 742  | 459  |   |
|    | GO:  |                                                                |       | 79/ | 0.07 | 0.05 |   |
| BP | 0048 | neuron fate commitment                                         | 3/292 | 233 | 678  | 676  | 3 |
|    | 663  |                                                                |       | 28  | 451  | 588  |   |
|    | GO:  |                                                                |       | 79/ | 0.07 | 0.05 |   |
| BP | 0051 | regulation of synaptic transmission, glutamatergic             | 3/292 | 233 | 678  | 676  | 3 |
|    | 966  |                                                                |       | 28  | 451  | 588  |   |
|    | GO:  |                                                                |       | 128 | 0.07 | 0.05 |   |
| BP | 0010 | positive regulation of cell-substrate adhesion                 | 4/292 | /23 | 736  | 714  | 4 |
|    | 811  |                                                                |       | 328 | 425  | 868  |   |
|    | GO:  |                                                                |       | 128 | 0.07 | 0.05 |   |
| BP | 0043 | regulation of protein-containing complex disassembly           | 4/292 | /23 | 736  | 714  | 4 |
|    | 244  |                                                                |       | 328 | 425  | 868  |   |
|    | GO:  |                                                                |       | 37/ | 0.07 | 0.05 |   |
| BP | 0002 | activation of innate immune response                           | 2/292 | 233 | 811  | 763  | 2 |
|    | 218  |                                                                |       | 28  | 496  | 401  |   |

|    |                                                                 |       |     |      |      |   |
|----|-----------------------------------------------------------------|-------|-----|------|------|---|
|    | GO:                                                             |       | 37/ | 0.07 | 0.05 |   |
| BP | 0014 response to activity                                       | 2/292 | 233 | 811  | 763  | 2 |
|    | 823                                                             |       | 28  | 496  | 401  |   |
|    | GO:                                                             |       | 37/ | 0.07 | 0.05 |   |
| BP | 0021 cerebellar Purkinje cell layer development                 | 2/292 | 233 | 811  | 763  | 2 |
|    | 680                                                             |       | 28  | 496  | 401  |   |
|    | GO:                                                             |       | 80/ | 0.07 | 0.05 |   |
| BP | 0034 cellular carbohydrate biosynthetic process                 | 3/292 | 233 | 907  | 829  | 3 |
|    | 637                                                             |       | 28  | 107  | 282  |   |
|    | GO:                                                             |       | 80/ | 0.07 | 0.05 |   |
| BP | 1901 negative regulation of muscle tissue development           | 3/292 | 233 | 907  | 829  | 3 |
|    | 862                                                             |       | 28  | 107  | 282  |   |
|    | GO:                                                             |       | 38/ | 0.08 | 0.06 |   |
| BP | 0001 endoderm formation                                         | 2/292 | 233 | 179  | 003  | 2 |
|    | 706                                                             |       | 28  | 624  | 802  |   |
|    | GO:                                                             |       | 38/ | 0.08 | 0.06 |   |
| BP | 0010 positive regulation of muscle cell apoptotic process       | 2/292 | 233 | 179  | 003  | 2 |
|    | 661                                                             |       | 28  | 624  | 802  |   |
|    | GO:                                                             |       | 38/ | 0.08 | 0.06 |   |
| BP | 0030 granulocyte differentiation                                | 2/292 | 233 | 179  | 003  | 2 |
|    | 851                                                             |       | 28  | 624  | 802  |   |
|    | GO:                                                             |       | 38/ | 0.08 | 0.06 |   |
| BP | 0038 vascular endothelial growth factor signaling pathway       | 2/292 | 233 | 179  | 003  | 2 |
|    | 084                                                             |       | 28  | 624  | 802  |   |
|    | GO:                                                             |       | 38/ | 0.08 | 0.06 |   |
| BP | 0045 regulation of endothelial cell differentiation             | 2/292 | 233 | 179  | 003  | 2 |
|    | 601                                                             |       | 28  | 624  | 802  |   |
|    | GO:                                                             |       | 38/ | 0.08 | 0.06 |   |
| BP | 0051 intracellular pH reduction                                 | 2/292 | 233 | 179  | 003  | 2 |
|    | 452                                                             |       | 28  | 624  | 802  |   |
|    | GO:                                                             |       | 38/ | 0.08 | 0.06 |   |
| BP | 0060 placenta blood vessel development                          | 2/292 | 233 | 179  | 003  | 2 |
|    | 674                                                             |       | 28  | 624  | 802  |   |
|    | GO:                                                             |       | 38/ | 0.08 | 0.06 |   |
| BP | 0070 protein kinase C signaling                                 | 2/292 | 233 | 179  | 003  | 2 |
|    | 528                                                             |       | 28  | 624  | 802  |   |
|    | GO:                                                             |       | 38/ | 0.08 | 0.06 |   |
| BP | 1903 negative regulation of calcium ion transmembrane transport | 2/292 | 233 | 179  | 003  | 2 |
|    | 170                                                             |       | 28  | 624  | 802  |   |
|    | GO:                                                             |       | 38/ | 0.08 | 0.06 |   |
| BP | 1904 positive regulation of epithelial cell apoptotic process   | 2/292 | 233 | 179  | 003  | 2 |
|    | 037                                                             |       | 28  | 624  | 802  |   |



|    |      |                                                                            |       |      |      |       |
|----|------|----------------------------------------------------------------------------|-------|------|------|-------|
|    | GO:  |                                                                            | 38/   | 0.08 | 0.06 |       |
| BP | 2000 | positive regulation of excitatory postsynaptic potential                   | 2/292 | 233  | 179  | 003 2 |
|    | 463  |                                                                            |       | 28   | 624  | 802   |
|    | GO:  |                                                                            |       | 240  | 0.08 | 0.06  |
| BP | 1903 | regulation of protein modification by small protein conjugation or removal | 6/292 | /23  | 201  | 017 6 |
|    | 320  |                                                                            |       | 328  | 66   | 583   |
|    | GO:  |                                                                            |       | 184  | 0.08 | 0.06  |
| BP | 0140 | meiotic nuclear division                                                   | 5/292 | /23  | 207  | 019 5 |
|    | 013  |                                                                            |       | 328  | 613  | 558   |
|    | GO:  |                                                                            |       | 359  | 0.08 | 0.06  |
| BP | 0007 | germ cell development                                                      | 8/292 | /23  | 317  | 097 8 |
|    | 281  |                                                                            |       | 328  | 439  | 682   |
|    | GO:  |                                                                            |       | 360  | 0.08 | 0.06  |
| BP | 0046 | glycerolipid metabolic process                                             | 8/292 | /23  | 419  | 170 8 |
|    | 486  |                                                                            |       | 328  | 473  | 033   |
|    | GO:  |                                                                            |       | 39/  | 0.08 | 0.06  |
| BP | 0030 | positive regulation of BMP signaling pathway                               | 2/292 | 233  | 552  | 257 2 |
|    | 513  |                                                                            |       | 28   | 993  | 939   |
|    | GO:  |                                                                            |       | 39/  | 0.08 | 0.06  |
| BP | 0032 | regulation of polysaccharide biosynthetic process                          | 2/292 | 233  | 552  | 257 2 |
|    | 885  |                                                                            |       | 28   | 993  | 939   |
|    | GO:  |                                                                            |       | 39/  | 0.08 | 0.06  |
| BP | 0050 | pigment cell differentiation                                               | 2/292 | 233  | 552  | 257 2 |
|    | 931  |                                                                            |       | 28   | 993  | 939   |
|    | GO:  |                                                                            |       | 39/  | 0.08 | 0.06  |
| BP | 0090 | regulation of spindle organization                                         | 2/292 | 233  | 552  | 257 2 |
|    | 224  |                                                                            |       | 28   | 993  | 939   |
|    | GO:  |                                                                            |       | 83/  | 0.08 | 0.06  |
| BP | 0021 | forebrain generation of neurons                                            | 3/292 | 233  | 610  | 297 3 |
|    | 872  |                                                                            |       | 28   | 612  | 6     |
|    | GO:  |                                                                            |       | 187  | 0.08 | 0.06  |
| BP | 0030 | actin filament polymerization                                              | 5/292 | /23  | 651  | 324 5 |
|    | 041  |                                                                            |       | 328  | 306  | 856   |
|    | GO:  |                                                                            |       | 188  | 0.08 | 0.06  |
| BP | 0008 | regulation of actin polymerization or depolymerization                     | 5/292 | /23  | 801  | 430 5 |
|    | 064  |                                                                            |       | 328  | 952  | 759   |
|    | GO:  |                                                                            |       | 134  | 0.08 | 0.06  |
| BP | 0055 | transition metal ion homeostasis                                           | 4/292 | /23  | 803  | 430 4 |
|    | 076  |                                                                            |       | 328  | 134  | 759   |
|    | GO:  |                                                                            |       | 84/  | 0.08 | 0.06  |
| BP | 0006 | regulation of striated muscle contraction                                  | 3/292 | 233  | 850  | 463 3 |
|    | 942  |                                                                            |       | 28   | 838  | 049   |

|    |                                                                 |       |     |      |      |   |
|----|-----------------------------------------------------------------|-------|-----|------|------|---|
|    | GO:                                                             |       | 40/ | 0.08 | 0.06 |   |
| BP | 0001 neurotransmitter uptake                                    | 2/292 | 233 | 931  | 496  | 2 |
|    | 504                                                             |       | 28  | 416  | 181  |   |
|    | GO:                                                             |       | 40/ | 0.08 | 0.06 |   |
| BP | 0007 long-term memory                                           | 2/292 | 233 | 931  | 496  | 2 |
|    | 616                                                             |       | 28  | 416  | 181  |   |
|    | GO:                                                             |       | 40/ | 0.08 | 0.06 |   |
| BP | 0015 neutral amino acid transport                               | 2/292 | 233 | 931  | 496  | 2 |
|    | 804                                                             |       | 28  | 416  | 181  |   |
|    | GO:                                                             |       | 40/ | 0.08 | 0.06 |   |
| BP | 0040 positive regulation of embryonic development               | 2/292 | 233 | 931  | 496  | 2 |
|    | 019                                                             |       | 28  | 416  | 181  |   |
|    | GO:                                                             |       | 40/ | 0.08 | 0.06 |   |
| BP | 0045 positive regulation of nucleotide metabolic process        | 2/292 | 233 | 931  | 496  | 2 |
|    | 981                                                             |       | 28  | 416  | 181  |   |
|    | GO:                                                             |       | 40/ | 0.08 | 0.06 |   |
| BP | 0060 face morphogenesis                                         | 2/292 | 233 | 931  | 496  | 2 |
|    | 325                                                             |       | 28  | 416  | 181  |   |
|    | GO:                                                             |       | 40/ | 0.08 | 0.06 |   |
| BP | 0085 extracellular matrix assembly                              | 2/292 | 233 | 931  | 496  | 2 |
|    | 029                                                             |       | 28  | 416  | 181  |   |
|    | GO:                                                             |       | 40/ | 0.08 | 0.06 |   |
| BP | 0086 regulation of cardiac muscle cell contraction              | 2/292 | 233 | 931  | 496  | 2 |
|    | 004                                                             |       | 28  | 416  | 181  |   |
|    | GO:                                                             |       | 40/ | 0.08 | 0.06 |   |
| BP | 1900 positive regulation of purine nucleotide metabolic process | 2/292 | 233 | 931  | 496  | 2 |
|    | 544                                                             |       | 28  | 416  | 181  |   |
|    | GO:                                                             |       | 40/ | 0.08 | 0.06 |   |
| BP | 1903 regulation of anion transmembrane transport                | 2/292 | 233 | 931  | 496  | 2 |
|    | 959                                                             |       | 28  | 416  | 181  |   |
|    | GO:                                                             |       | 365 | 0.08 | 0.06 |   |
| BP | 0048 regulation of synaptic plasticity                          | 8/292 | /23 | 940  | 500  | 8 |
|    | 167                                                             |       | 328 | 679  | 357  |   |
|    | GO:                                                             |       | 135 | 0.08 | 0.06 |   |
| BP | 0051 interaction with host                                      | 4/292 | /23 | 987  | 531  | 4 |
|    | 701                                                             |       | 328 | 504  | 828  |   |
|    | GO:                                                             |       | 85/ | 0.09 | 0.06 |   |
| BP | 0051 catecholamine transport                                    | 3/292 | 233 | 093  | 606  | 3 |
|    | 937                                                             |       | 28  | 863  | 524  |   |
|    | GO:                                                             |       | 190 | 0.09 | 0.06 |   |
| BP | 0055 striated muscle cell development                           | 5/292 | /23 | 107  | 613  | 5 |
|    | 002                                                             |       | 328 | 337  | 709  |   |

|    |                                                          |       |     |      |      |   |
|----|----------------------------------------------------------|-------|-----|------|------|---|
|    | GO:                                                      |       | 136 | 0.09 | 0.06 |   |
| BP | 0035 gene silencing by miRNA                             | 4/292 | /23 | 173  | 659  | 4 |
|    | 195                                                      |       | 328 | 724  | 298  |   |
|    | GO:                                                      |       | 191 | 0.09 | 0.06 |   |
| BP | 0030 regulation of actin filament length                 | 5/292 | /23 | 262  | 720  | 5 |
|    | 832                                                      |       | 328 | 065  | 781  |   |
|    | GO:                                                      |       | 41/ | 0.09 | 0.06 |   |
| BP | 0002 negative regulation of leukocyte migration          | 2/292 | 233 | 314  | 745  | 2 |
|    | 686                                                      |       | 28  | 709  | 718  |   |
|    | GO:                                                      |       | 41/ | 0.09 | 0.06 |   |
| BP | 0014 Schwann cell differentiation                        | 2/292 | 233 | 314  | 745  | 2 |
|    | 037                                                      |       | 28  | 709  | 718  |   |
|    | GO:                                                      |       | 41/ | 0.09 | 0.06 |   |
| BP | 0034 amyloid-beta formation                              | 2/292 | 233 | 314  | 745  | 2 |
|    | 205                                                      |       | 28  | 709  | 718  |   |
|    | GO:                                                      |       | 41/ | 0.09 | 0.06 |   |
| BP | 0045 negative regulation of endocytosis                  | 2/292 | 233 | 314  | 745  | 2 |
|    | 806                                                      |       | 28  | 709  | 718  |   |
|    | GO:                                                      |       | 41/ | 0.09 | 0.06 |   |
| BP | 0097 programmed necrotic cell death                      | 2/292 | 233 | 314  | 745  | 2 |
|    | 300                                                      |       | 28  | 709  | 718  |   |
|    | GO:                                                      |       | 86/ | 0.09 | 0.06 |   |
| BP | 0035 embryonic heart tube development                    | 3/292 | 233 | 339  | 755  | 3 |
|    | 050                                                      |       | 28  | 649  | 825  |   |
|    | GO:                                                      |       | 86/ | 0.09 | 0.06 |   |
| BP | 0120 tight junction assembly                             | 3/292 | 233 | 339  | 755  | 3 |
|    | 192                                                      |       | 28  | 649  | 825  |   |
|    | GO:                                                      |       | 86/ | 0.09 | 0.06 |   |
| BP | 1901 regulation of potassium ion transmembrane transport | 3/292 | 233 | 339  | 755  | 3 |
|    | 379                                                      |       | 28  | 649  | 825  |   |
|    | GO:                                                      |       | 137 | 0.09 | 0.06 |   |
| BP | 0035 modulation of process of other organism             | 4/292 | /23 | 361  | 769  | 4 |
|    | 821                                                      |       | 328 | 779  | 179  |   |
|    | GO:                                                      |       | 250 | 0.09 | 0.06 |   |
| BP | 0031 negative regulation of cellular catabolic process   | 6/292 | /23 | 511  | 874  | 6 |
|    | 330                                                      |       | 328 | 156  | 495  |   |
|    | GO:                                                      |       | 193 | 0.09 | 0.06 |   |
| BP | 0009 epidermal cell differentiation                      | 5/292 | /23 | 575  | 918  | 5 |
|    | 913                                                      |       | 328 | 562  | 337  |   |
|    | GO:                                                      |       | 251 | 0.09 | 0.06 |   |
| BP | 0007 aging                                               | 6/292 | /23 | 647  | 965  | 6 |
|    | 568                                                      |       | 328 | 947  | 18   |   |

|    |                                                                                          |       |     |      |      |   |
|----|------------------------------------------------------------------------------------------|-------|-----|------|------|---|
|    | GO:                                                                                      |       | 251 | 0.09 | 0.06 |   |
| BP | 0098 import into cell                                                                    | 6/292 | /23 | 647  | 965  | 6 |
|    | 657                                                                                      |       | 328 | 947  | 18   |   |
|    | GO:                                                                                      |       | 42/ | 0.09 | 0.06 |   |
| BP | 0001 cell fate determination                                                             | 2/292 | 233 | 702  | 996  | 2 |
|    | 709                                                                                      |       | 28  | 691  | 49   |   |
|    | GO:                                                                                      |       | 42/ | 0.09 | 0.06 |   |
| BP | 0021 central nervous system neuron axonogenesis                                          | 2/292 | 233 | 702  | 996  | 2 |
|    | 955                                                                                      |       | 28  | 691  | 49   |   |
|    | GO:                                                                                      |       | 42/ | 0.09 | 0.06 |   |
| BP | 0042 dopamine metabolic process                                                          | 2/292 | 233 | 702  | 996  | 2 |
|    | 417                                                                                      |       | 28  | 691  | 49   |   |
|    | GO:                                                                                      |       | 139 | 0.09 | 0.07 |   |
| BP | 0055 cardiac muscle cell differentiation                                                 | 4/292 | /23 | 743  | 023  | 4 |
|    | 007                                                                                      |       | 328 | 343  | 06   |   |
|    | GO:                                                                                      |       | 88/ | 0.09 | 0.07 |   |
| BP | 0006 energy reserve metabolic process                                                    | 3/292 | 233 | 839  | 081  | 3 |
|    | 112                                                                                      |       | 28  | 353  | 2    |   |
|    | GO:                                                                                      |       | 88/ | 0.09 | 0.07 |   |
| BP | 0060 excitatory postsynaptic potential                                                   | 3/292 | 233 | 839  | 081  | 3 |
|    | 079                                                                                      |       | 28  | 353  | 2    |   |
|    | GO:                                                                                      |       | 88/ | 0.09 | 0.07 |   |
| BP | 1901 positive regulation of mitotic cell cycle phase transition                          | 3/292 | 233 | 839  | 081  | 3 |
|    | 992                                                                                      |       | 28  | 353  | 2    |   |
|    | GO:                                                                                      |       | 88/ | 0.09 | 0.07 |   |
| BP | 1903 negative regulation of protein modification by small protein conjugation or removal | 3/292 | 233 | 839  | 081  | 3 |
|    | 321                                                                                      |       | 28  | 353  | 2    |   |
|    | GO:                                                                                      |       | 253 | 0.09 | 0.07 |   |
| BP | 0046 ATP metabolic process                                                               | 6/292 | /23 | 924  | 139  | 6 |
|    | 034                                                                                      |       | 328 | 676  | 821  |   |
|    | GO:                                                                                      |       | 196 | 0.10 | 0.07 |   |
| BP | 0007 skeletal muscle tissue development                                                  | 5/292 | /23 | 055  | 231  | 5 |
|    | 519                                                                                      |       | 328 | 823  | 348  |   |
|    | GO:                                                                                      |       | 254 | 0.10 | 0.07 |   |
| BP | 0017 regulation of exocytosis                                                            | 6/292 | /23 | 064  | 231  | 6 |
|    | 157                                                                                      |       | 328 | 609  | 474  |   |
|    | GO:                                                                                      |       | 43/ | 0.10 | 0.07 |   |
| BP | 0001 B cell apoptotic process                                                            | 2/292 | 233 | 095  | 231  | 2 |
|    | 783                                                                                      |       | 28  | 187  | 474  |   |
|    | GO:                                                                                      |       | 43/ | 0.10 | 0.07 |   |
| BP | 0003 physiological muscle hypertrophy                                                    | 2/292 | 233 | 095  | 231  | 2 |
|    | 298                                                                                      |       | 28  | 187  | 474  |   |

|    |                                                              |       |     |      |      |   |  |
|----|--------------------------------------------------------------|-------|-----|------|------|---|--|
|    | GO:                                                          |       | 43/ | 0.10 | 0.07 |   |  |
| BP | 0003 physiological cardiac muscle hypertrophy                | 2/292 | 233 | 095  | 231  | 2 |  |
|    | 301                                                          |       | 28  | 187  | 474  |   |  |
|    | GO:                                                          |       | 43/ | 0.10 | 0.07 |   |  |
| BP | 0045 pH reduction                                            | 2/292 | 233 | 095  | 231  | 2 |  |
|    | 851                                                          |       | 28  | 187  | 474  |   |  |
|    | GO:                                                          |       | 43/ | 0.10 | 0.07 |   |  |
| BP | 0046 negative regulation of alpha-beta T cell activation     | 2/292 | 233 | 095  | 231  | 2 |  |
|    | 636                                                          |       | 28  | 187  | 474  |   |  |
|    | GO:                                                          |       | 43/ | 0.10 | 0.07 |   |  |
| BP | 0046 phosphatidylinositol phosphorylation                    | 2/292 | 233 | 095  | 231  | 2 |  |
|    | 854                                                          |       | 28  | 187  | 474  |   |  |
|    | GO:                                                          |       | 43/ | 0.10 | 0.07 |   |  |
| BP | 0060 inner ear receptor cell stereocilium organization       | 2/292 | 233 | 095  | 231  | 2 |  |
|    | 122                                                          |       | 28  | 187  | 474  |   |  |
|    | GO:                                                          |       | 43/ | 0.10 | 0.07 |   |  |
| BP | 0061 cell growth involved in cardiac muscle cell development | 2/292 | 233 | 095  | 231  | 2 |  |
|    | 049                                                          |       | 28  | 187  | 474  |   |  |
|    | GO:                                                          |       | 43/ | 0.10 | 0.07 |   |  |
| BP | 0097 dendrite extension                                      | 2/292 | 233 | 095  | 231  | 2 |  |
|    | 484                                                          |       | 28  | 187  | 474  |   |  |
|    | GO:                                                          |       | 141 | 0.10 | 0.07 |   |  |
| BP | 0035 response to topologically incorrect protein             | 4/292 | /23 | 132  | 252  | 4 |  |
|    | 966                                                          |       | 328 | 088  | 277  |   |  |
|    | GO:                                                          |       | 141 | 0.10 | 0.07 |   |  |
| BP | 1902 secondary alcohol metabolic process                     | 4/292 | /23 | 132  | 252  | 4 |  |
|    | 652                                                          |       | 328 | 088  | 277  |   |  |
|    | GO:                                                          |       | 142 | 0.10 | 0.07 |   |  |
| BP | 0035 post-transcriptional gene silencing by RNA              | 4/292 | /23 | 329  | 384  | 4 |  |
|    | 194                                                          |       | 328 | 118  | 712  |   |  |
|    | GO:                                                          |       | 142 | 0.10 | 0.07 |   |  |
| BP | 0046 phosphatidylinositol metabolic process                  | 4/292 | /23 | 329  | 384  | 4 |  |
|    | 488                                                          |       | 328 | 118  | 712  |   |  |
|    | GO:                                                          |       | 142 | 0.10 | 0.07 |   |  |
| BP | 0048 embryonic skeletal system development                   | 4/292 | /23 | 329  | 384  | 4 |  |
|    | 706                                                          |       | 328 | 118  | 712  |   |  |
|    | GO:                                                          |       | 90/ | 0.10 | 0.07 |   |  |
| BP | 0070 calcium ion import                                      | 3/292 | 233 | 349  | 396  | 3 |  |
|    | 509                                                          |       | 28  | 638  | 517  |   |  |
|    | GO:                                                          |       | 257 | 0.10 | 0.07 |   |  |
| BP | 0006 glycerophospholipid metabolic process                   | 6/292 | /23 | 490  | 475  | 6 |  |
|    | 650                                                          |       | 328 | 636  | 114  |   |  |

|    |                                              |       |     |      |      |   |
|----|----------------------------------------------|-------|-----|------|------|---|
|    | GO:                                          |       | 44/ | 0.10 | 0.07 |   |
| BP | 0005 glycogen biosynthetic process           | 2/292 | 233 | 492  | 475  | 2 |
|    | 978                                          |       | 28  | 023  | 114  |   |
|    | GO:                                          |       | 44/ | 0.10 | 0.07 |   |
| BP | 0006 glycosaminoglycan biosynthetic process  | 2/292 | 233 | 492  | 475  | 2 |
|    | 024                                          |       | 28  | 023  | 114  |   |
|    | GO:                                          |       | 44/ | 0.10 | 0.07 |   |
| BP | 0009 glucan biosynthetic process             | 2/292 | 233 | 492  | 475  | 2 |
|    | 250                                          |       | 28  | 023  | 114  |   |
|    | GO:                                          |       | 44/ | 0.10 | 0.07 |   |
| BP | 0016 protein sumoylation                     | 2/292 | 233 | 492  | 475  | 2 |
|    | 925                                          |       | 28  | 023  | 114  |   |
|    | GO:                                          |       | 44/ | 0.10 | 0.07 |   |
| BP | 0032 regulation of hormone metabolic process | 2/292 | 233 | 492  | 475  | 2 |
|    | 350                                          |       | 28  | 023  | 114  |   |
|    | GO:                                          |       | 44/ | 0.10 | 0.07 |   |
| BP | 0048 brain morphogenesis                     | 2/292 | 233 | 492  | 475  | 2 |
|    | 854                                          |       | 28  | 023  | 114  |   |
|    | GO:                                          |       | 44/ | 0.10 | 0.07 |   |
| BP | 0097 cellular response to toxic substance    | 2/292 | 233 | 492  | 475  | 2 |
|    | 237                                          |       | 28  | 023  | 114  |   |
|    | GO:                                          |       | 143 | 0.10 | 0.07 |   |
| BP | 0030 establishment of cell polarity          | 4/292 | /23 | 527  | 491  | 4 |
|    | 010                                          |       | 328 | 9    | 996  |   |
|    | GO:                                          |       | 143 | 0.10 | 0.07 |   |
| BP | 0030 embryonic limb morphogenesis            | 4/292 | /23 | 527  | 491  | 4 |
|    | 326                                          |       | 328 | 9    | 996  |   |
|    | GO:                                          |       | 143 | 0.10 | 0.07 |   |
| BP | 0035 embryonic appendage morphogenesis       | 4/292 | /23 | 527  | 491  | 4 |
|    | 113                                          |       | 328 | 9    | 996  |   |
|    | GO:                                          |       | 91/ | 0.10 | 0.07 |   |
| BP | 0120 tight junction organization             | 3/292 | 233 | 608  | 546  | 3 |
|    | 193                                          |       | 28  | 65   | 55   |   |
|    | GO:                                          |       | 258 | 0.10 | 0.07 |   |
| BP | 0032 regulation of microtubule-based process | 6/292 | /23 | 634  | 562  | 6 |
|    | 886                                          |       | 328 | 709  | 172  |   |
|    | GO:                                          |       | 144 | 0.10 | 0.07 |   |
| BP | 0015 inorganic anion transport               | 4/292 | /23 | 728  | 622  | 4 |
|    | 698                                          |       | 328 | 419  | 933  |   |
|    | GO:                                          |       | 144 | 0.10 | 0.07 |   |
| BP | 0071 cellular response to glucose stimulus   | 4/292 | /23 | 728  | 622  | 4 |
|    | 333                                          |       | 328 | 419  | 933  |   |

|    |                                                                |       |     |      |      |   |
|----|----------------------------------------------------------------|-------|-----|------|------|---|
|    | GO:                                                            |       | 320 | 0.10 | 0.07 |   |
| BP | 0044 small molecule catabolic process                          | 7/292 | /23 | 848  | 705  | 7 |
|    | 282                                                            |       | 328 | 457  | 257  |   |
|    | GO:                                                            |       | 92/ | 0.10 | 0.07 |   |
| BP | 0006 glycolytic process                                        | 3/292 | 233 | 870  | 714  | 3 |
|    | 096                                                            |       | 28  | 189  | 754  |   |
|    | GO:                                                            |       | 92/ | 0.10 | 0.07 |   |
| BP | 0090 activation of GTPase activity                             | 3/292 | 233 | 870  | 714  | 3 |
|    | 630                                                            |       | 28  | 189  | 754  |   |
|    | GO:                                                            |       | 45/ | 0.10 | 0.07 |   |
| BP | 0010 positive regulation of glucose metabolic process          | 2/292 | 233 | 893  | 722  | 2 |
|    | 907                                                            |       | 28  | 031  | 055  |   |
|    | GO:                                                            |       | 45/ | 0.10 | 0.07 |   |
| BP | 0050 regulation of T cell receptor signaling pathway           | 2/292 | 233 | 893  | 722  | 2 |
|    | 856                                                            |       | 28  | 031  | 055  |   |
|    | GO:                                                            |       | 45/ | 0.10 | 0.07 |   |
| BP | 0089 amino acid import across plasma membrane                  | 2/292 | 233 | 893  | 722  | 2 |
|    | 718                                                            |       | 28  | 031  | 055  |   |
|    | GO:                                                            |       | 145 | 0.10 | 0.07 |   |
| BP | 1903 positive regulation of cellular protein catabolic process | 4/292 | /23 | 930  | 745  | 4 |
|    | 364                                                            |       | 328 | 661  | 755  |   |
|    | GO:                                                            |       | 202 | 0.11 | 0.07 |   |
| BP | 1903 meiotic cell cycle process                                | 5/292 | /23 | 051  | 828  | 5 |
|    | 046                                                            |       | 328 | 755  | 559  |   |
|    | GO:                                                            |       | 93/ | 0.11 | 0.07 |   |
| BP | 0006 ATP generation from ADP                                   | 3/292 | 233 | 134  | 866  | 3 |
|    | 757                                                            |       | 28  | 215  | 113  |   |
|    | GO:                                                            |       | 93/ | 0.11 | 0.07 |   |
| BP | 0007 glutamate receptor signaling pathway                      | 3/292 | 233 | 134  | 866  | 3 |
|    | 215                                                            |       | 28  | 215  | 113  |   |
|    | GO:                                                            |       | 93/ | 0.11 | 0.07 |   |
| BP | 0008 regulation of smoothened signaling pathway                | 3/292 | 233 | 134  | 866  | 3 |
|    | 589                                                            |       | 28  | 215  | 113  |   |
|    | GO:                                                            |       | 93/ | 0.11 | 0.07 |   |
| BP | 0009 amine metabolic process                                   | 3/292 | 233 | 134  | 866  | 3 |
|    | 308                                                            |       | 28  | 215  | 113  |   |
|    | GO:                                                            |       | 93/ | 0.11 | 0.07 |   |
| BP | 0009 axis specification                                        | 3/292 | 233 | 134  | 866  | 3 |
|    | 798                                                            |       | 28  | 215  | 113  |   |
|    | GO:                                                            |       | 146 | 0.11 | 0.07 |   |
| BP | 0016 posttranscriptional gene silencing                        | 4/292 | /23 | 134  | 866  | 4 |
|    | 441                                                            |       | 328 | 61   | 113  |   |

|    |                                                             |       |     |      |      |   |
|----|-------------------------------------------------------------|-------|-----|------|------|---|
|    | GO:                                                         |       | 146 | 0.11 | 0.07 |   |
| BP | 0071 cellular response to hexose stimulus                   | 4/292 | /23 | 134  | 866  | 4 |
|    | 331                                                         |       | 328 | 61   | 113  |   |
|    | GO:                                                         |       | 46/ | 0.11 | 0.07 |   |
| BP | 0002 negative regulation of lymphocyte mediated immunity    | 2/292 | 233 | 298  | 954  | 2 |
|    | 707                                                         |       | 28  | 044  | 164  |   |
|    | GO:                                                         |       | 46/ | 0.11 | 0.07 |   |
| BP | 0003 regulation of membrane depolarization                  | 2/292 | 233 | 298  | 954  | 2 |
|    | 254                                                         |       | 28  | 044  | 164  |   |
|    | GO:                                                         |       | 46/ | 0.11 | 0.07 |   |
| BP | 0010 regulation of peptidyl-threonine phosphorylation       | 2/292 | 233 | 298  | 954  | 2 |
|    | 799                                                         |       | 28  | 044  | 164  |   |
|    | GO:                                                         |       | 46/ | 0.11 | 0.07 |   |
| BP | 0032 regulation of polysaccharide metabolic process         | 2/292 | 233 | 298  | 954  | 2 |
|    | 881                                                         |       | 28  | 044  | 164  |   |
|    | GO:                                                         |       | 46/ | 0.11 | 0.07 |   |
| BP | 0048 spleen development                                     | 2/292 | 233 | 298  | 954  | 2 |
|    | 536                                                         |       | 28  | 044  | 164  |   |
|    | GO:                                                         |       | 46/ | 0.11 | 0.07 |   |
| BP | 0060 head morphogenesis                                     | 2/292 | 233 | 298  | 954  | 2 |
|    | 323                                                         |       | 28  | 044  | 164  |   |
|    | GO:                                                         |       | 46/ | 0.11 | 0.07 |   |
| BP | 0090 negative regulation of intracellular protein transport | 2/292 | 233 | 298  | 954  | 2 |
|    | 317                                                         |       | 28  | 044  | 164  |   |
|    | GO:                                                         |       | 46/ | 0.11 | 0.07 |   |
| BP | 0098 postsynaptic signal transduction                       | 2/292 | 233 | 298  | 954  | 2 |
|    | 926                                                         |       | 28  | 044  | 164  |   |
|    | GO:                                                         |       | 46/ | 0.11 | 0.07 |   |
| BP | 1901 positive regulation of protein acetylation             | 2/292 | 233 | 298  | 954  | 2 |
|    | 985                                                         |       | 28  | 044  | 164  |   |
|    | GO:                                                         |       | 147 | 0.11 | 0.07 |   |
| BP | 0071 cellular response to monosaccharide stimulus           | 4/292 | /23 | 340  | 980  | 4 |
|    | 326                                                         |       | 328 | 251  | 835  |   |
|    | GO:                                                         |       | 95/ | 0.11 | 0.08 |   |
| BP | 0002 organ or tissue specific immune response               | 3/292 | 233 | 669  | 138  | 3 |
|    | 251                                                         |       | 28  | 565  | 184  |   |
|    | GO:                                                         |       | 47/ | 0.11 | 0.08 |   |
| BP | 0021 olfactory bulb development                             | 2/292 | 233 | 706  | 138  | 2 |
|    | 772                                                         |       | 28  | 9    | 184  |   |
|    | GO:                                                         |       | 47/ | 0.11 | 0.08 |   |
| BP | 0035 cellular response to interferon-beta                   | 2/292 | 233 | 706  | 138  | 2 |
|    | 458                                                         |       | 28  | 9    | 184  |   |



|    |                                                                               |       |     |      |      |   |
|----|-------------------------------------------------------------------------------|-------|-----|------|------|---|
|    | GO:                                                                           |       | 47/ | 0.11 | 0.08 |   |
| BP | 0043 apoptotic cell clearance                                                 | 2/292 | 233 | 706  | 138  | 2 |
|    | 277                                                                           |       | 28  | 9    | 184  |   |
|    | GO:                                                                           |       | 47/ | 0.11 | 0.08 |   |
| BP | 0045 sarcomere organization                                                   | 2/292 | 233 | 706  | 138  | 2 |
|    | 214                                                                           |       | 28  | 9    | 184  |   |
|    | GO:                                                                           |       | 206 | 0.11 | 0.08 |   |
| BP | 0031 regulation of protein ubiquitination                                     | 5/292 | /23 | 741  | 138  | 5 |
|    | 396                                                                           |       | 328 | 325  | 184  |   |
|    | GO:                                                                           |       | 149 | 0.11 | 0.08 |   |
| BP | 0034 erythrocyte homeostasis                                                  | 4/292 | /23 | 756  | 138  | 4 |
|    | 101                                                                           |       | 328 | 546  | 184  |   |
|    | GO:                                                                           |       | 10/ | 0.11 | 0.08 |   |
| BP | 0000 urea cycle                                                               | 1/292 | 233 | 837  | 138  | 1 |
|    | 050                                                                           |       | 28  | 274  | 184  |   |
|    | GO:                                                                           |       | 10/ | 0.11 | 0.08 |   |
| BP | 0000 activation of MAPKKK activity                                            | 1/292 | 233 | 837  | 138  | 1 |
|    | 185                                                                           |       | 28  | 274  | 184  |   |
|    | GO:                                                                           |       | 10/ | 0.11 | 0.08 |   |
| BP | 0002 male germ cell proliferation                                             | 1/292 | 233 | 837  | 138  | 1 |
|    | 176                                                                           |       | 28  | 274  | 184  |   |
|    | GO:                                                                           |       | 10/ | 0.11 | 0.08 |   |
| BP | 0002 natural killer cell mediated immune response to tumor cell               | 1/292 | 233 | 837  | 138  | 1 |
|    | 423                                                                           |       | 28  | 274  | 184  |   |
|    | GO:                                                                           |       | 10/ | 0.11 | 0.08 |   |
| BP | 0002 regulation of natural killer cell mediated immune response to tumor cell | 1/292 | 233 | 837  | 138  | 1 |
|    | 855                                                                           |       | 28  | 274  | 184  |   |
|    | GO:                                                                           |       | 10/ | 0.11 | 0.08 |   |
| BP | 0003 regulation of Wnt signaling pathway involved in heart development        | 1/292 | 233 | 837  | 138  | 1 |
|    | 307                                                                           |       | 28  | 274  | 184  |   |
|    | GO:                                                                           |       | 10/ | 0.11 | 0.08 |   |
| BP | 0006 fructose metabolic process                                               | 1/292 | 233 | 837  | 138  | 1 |
|    | 000                                                                           |       | 28  | 274  | 184  |   |
|    | GO:                                                                           |       | 10/ | 0.11 | 0.08 |   |
| BP | 0006 arginine catabolic process                                               | 1/292 | 233 | 837  | 138  | 1 |
|    | 527                                                                           |       | 28  | 274  | 184  |   |
|    | GO:                                                                           |       | 10/ | 0.11 | 0.08 |   |
| BP | 0009 UV protection                                                            | 1/292 | 233 | 837  | 138  | 1 |
|    | 650                                                                           |       | 28  | 274  | 184  |   |
|    | GO:                                                                           |       | 10/ | 0.11 | 0.08 |   |
| BP | 0014 transition between fast and slow fiber                                   | 1/292 | 233 | 837  | 138  | 1 |
|    | 883                                                                           |       | 28  | 274  | 184  |   |

|    |      |                                                               |       |      |      |     |   |
|----|------|---------------------------------------------------------------|-------|------|------|-----|---|
|    | GO:  |                                                               | 10/   | 0.11 | 0.08 |     |   |
| BP | 0030 | regulation of intestinal cholesterol absorption               | 1/292 | 233  | 837  | 138 | 1 |
|    | 300  |                                                               |       | 28   | 274  | 184 |   |
|    | GO:  |                                                               | 10/   | 0.11 | 0.08 |     |   |
| BP | 0030 | negative regulation of granulocyte differentiation            | 1/292 | 233  | 837  | 138 | 1 |
|    | 853  |                                                               |       | 28   | 274  | 184 |   |
|    | GO:  |                                                               | 10/   | 0.11 | 0.08 |     |   |
| BP | 0032 | response to follicle-stimulating hormone                      | 1/292 | 233  | 837  | 138 | 1 |
|    | 354  |                                                               |       | 28   | 274  | 184 |   |
|    | GO:  |                                                               | 10/   | 0.11 | 0.08 |     |   |
| BP | 0032 | interleukin-18 production                                     | 1/292 | 233  | 837  | 138 | 1 |
|    | 621  |                                                               |       | 28   | 274  | 184 |   |
|    | GO:  |                                                               | 10/   | 0.11 | 0.08 |     |   |
| BP | 0032 | regulation of interleukin-1 alpha production                  | 1/292 | 233  | 837  | 138 | 1 |
|    | 650  |                                                               |       | 28   | 274  | 184 |   |
|    | GO:  |                                                               | 10/   | 0.11 | 0.08 |     |   |
| BP | 0033 | negative regulation of protein sumoylation                    | 1/292 | 233  | 837  | 138 | 1 |
|    | 234  |                                                               |       | 28   | 274  | 184 |   |
|    | GO:  |                                                               | 10/   | 0.11 | 0.08 |     |   |
| BP | 0033 | secretion of lysosomal enzymes                                | 1/292 | 233  | 837  | 138 | 1 |
|    | 299  |                                                               |       | 28   | 274  | 184 |   |
|    | GO:  |                                                               | 10/   | 0.11 | 0.08 |     |   |
| BP | 0034 | positive regulation of toll-like receptor 4 signaling pathway | 1/292 | 233  | 837  | 138 | 1 |
|    | 145  |                                                               |       | 28   | 274  | 184 |   |
|    | GO:  |                                                               | 10/   | 0.11 | 0.08 |     |   |
| BP | 0035 | negative regulation of urine volume                           | 1/292 | 233  | 837  | 138 | 1 |
|    | 811  |                                                               |       | 28   | 274  | 184 |   |
|    | GO:  |                                                               | 10/   | 0.11 | 0.08 |     |   |
| BP | 0035 | protein K11-linked deubiquitination                           | 1/292 | 233  | 837  | 138 | 1 |
|    | 871  |                                                               |       | 28   | 274  | 184 |   |
|    | GO:  |                                                               | 10/   | 0.11 | 0.08 |     |   |
| BP | 0043 | negative regulation of leukocyte degranulation                | 1/292 | 233  | 837  | 138 | 1 |
|    | 301  |                                                               |       | 28   | 274  | 184 |   |
|    | GO:  |                                                               | 10/   | 0.11 | 0.08 |     |   |
| BP | 0046 | adenosine metabolic process                                   | 1/292 | 233  | 837  | 138 | 1 |
|    | 085  |                                                               |       | 28   | 274  | 184 |   |
|    | GO:  |                                                               | 10/   | 0.11 | 0.08 |     |   |
| BP | 0048 | negative regulation of collateral sprouting                   | 1/292 | 233  | 837  | 138 | 1 |
|    | 671  |                                                               |       | 28   | 274  | 184 |   |
|    | GO:  |                                                               | 10/   | 0.11 | 0.08 |     |   |
| BP | 0048 | embryonic neurocranium morphogenesis                          | 1/292 | 233  | 837  | 138 | 1 |
|    | 702  |                                                               |       | 28   | 274  | 184 |   |

|    |      |                                                                   |       |     |      |      |   |
|----|------|-------------------------------------------------------------------|-------|-----|------|------|---|
|    | GO:  |                                                                   |       | 10/ | 0.11 | 0.08 |   |
| BP | 0051 | positive regulation of lipoprotein lipase activity                | 1/292 | 233 | 837  | 138  | 1 |
|    | 006  |                                                                   |       | 28  | 274  | 184  |   |
|    | GO:  |                                                                   |       | 10/ | 0.11 | 0.08 |   |
| BP | 0051 | dopamine uptake involved in synaptic transmission                 | 1/292 | 233 | 837  | 138  | 1 |
|    | 583  |                                                                   |       | 28  | 274  | 184  |   |
|    | GO:  |                                                                   |       | 10/ | 0.11 | 0.08 |   |
| BP | 0051 | regulation of fibrinolysis                                        | 1/292 | 233 | 837  | 138  | 1 |
|    | 917  |                                                                   |       | 28  | 274  | 184  |   |
|    | GO:  |                                                                   |       | 10/ | 0.11 | 0.08 |   |
| BP | 0051 | catecholamine uptake involved in synaptic transmission            | 1/292 | 233 | 837  | 138  | 1 |
|    | 934  |                                                                   |       | 28  | 274  | 184  |   |
|    | GO:  |                                                                   |       | 10/ | 0.11 | 0.08 |   |
| BP | 0051 | positive regulation of transmission of nerve impulse              | 1/292 | 233 | 837  | 138  | 1 |
|    | 971  |                                                                   |       | 28  | 274  | 184  |   |
|    | GO:  |                                                                   |       | 10/ | 0.11 | 0.08 |   |
| BP | 0061 | macrophage proliferation                                          | 1/292 | 233 | 837  | 138  | 1 |
|    | 517  |                                                                   |       | 28  | 274  | 184  |   |
|    | GO:  |                                                                   |       | 10/ | 0.11 | 0.08 |   |
| BP | 0061 | pharyngeal arch artery morphogenesis                              | 1/292 | 233 | 837  | 138  | 1 |
|    | 626  |                                                                   |       | 28  | 274  | 184  |   |
|    | GO:  |                                                                   |       | 10/ | 0.11 | 0.08 |   |
| BP | 0061 | chaperone-mediated autophagy                                      | 1/292 | 233 | 837  | 138  | 1 |
|    | 684  |                                                                   |       | 28  | 274  | 184  |   |
|    | GO:  |                                                                   |       | 10/ | 0.11 | 0.08 |   |
| BP | 0070 | negative regulation of thymocyte apoptotic process                | 1/292 | 233 | 837  | 138  | 1 |
|    | 244  |                                                                   |       | 28  | 274  | 184  |   |
|    | GO:  |                                                                   |       | 10/ | 0.11 | 0.08 |   |
| BP | 0071 | cellular response to vitamin D                                    | 1/292 | 233 | 837  | 138  | 1 |
|    | 305  |                                                                   |       | 28  | 274  | 184  |   |
|    | GO:  |                                                                   |       | 10/ | 0.11 | 0.08 |   |
| BP | 0071 | chemokine (C-C motif) ligand 5 production                         | 1/292 | 233 | 837  | 138  | 1 |
|    | 609  |                                                                   |       | 28  | 274  | 184  |   |
|    | GO:  |                                                                   |       | 10/ | 0.11 | 0.08 |   |
| BP | 0071 | negative regulation of transforming growth factor beta production | 1/292 | 233 | 837  | 138  | 1 |
|    | 635  |                                                                   |       | 28  | 274  | 184  |   |
|    | GO:  |                                                                   |       | 10/ | 0.11 | 0.08 |   |
| BP | 0072 | metanephric tubule morphogenesis                                  | 1/292 | 233 | 837  | 138  | 1 |
|    | 173  |                                                                   |       | 28  | 274  | 184  |   |
|    | GO:  |                                                                   |       | 10/ | 0.11 | 0.08 |   |
| BP | 0090 | primitive streak formation                                        | 1/292 | 233 | 837  | 138  | 1 |
|    | 009  |                                                                   |       | 28  | 274  | 184  |   |

|    |                                                                       |       |     |      |      |   |
|----|-----------------------------------------------------------------------|-------|-----|------|------|---|
|    | GO:                                                                   |       | 10/ | 0.11 | 0.08 |   |
| BP | 0090 regulation of arachidonic acid secretion                         | 1/292 | 233 | 837  | 138  | 1 |
|    | 237                                                                   |       | 28  | 274  | 184  |   |
|    | GO:                                                                   |       | 10/ | 0.11 | 0.08 |   |
| BP | 0090 regulation of heart induction                                    | 1/292 | 233 | 837  | 138  | 1 |
|    | 381                                                                   |       | 28  | 274  | 184  |   |
|    | GO:                                                                   |       | 10/ | 0.11 | 0.08 |   |
| BP | 0098 regulation of neuronal action potential                          | 1/292 | 233 | 837  | 138  | 1 |
|    | 908                                                                   |       | 28  | 274  | 184  |   |
|    | GO:                                                                   |       | 10/ | 0.11 | 0.08 |   |
| BP | 0099 trans-synaptic signaling by lipid                                | 1/292 | 233 | 837  | 138  | 1 |
|    | 541                                                                   |       | 28  | 274  | 184  |   |
|    | GO:                                                                   |       | 10/ | 0.11 | 0.08 |   |
| BP | 0099 trans-synaptic signaling by endocannabinoid                      | 1/292 | 233 | 837  | 138  | 1 |
|    | 542                                                                   |       | 28  | 274  | 184  |   |
|    | GO:                                                                   |       | 10/ | 0.11 | 0.08 |   |
| BP | 0106 regulation of cellular response to osmotic stress                | 1/292 | 233 | 837  | 138  | 1 |
|    | 049                                                                   |       | 28  | 274  | 184  |   |
|    | GO:                                                                   |       | 10/ | 0.11 | 0.08 |   |
| BP | 1900 positive regulation of receptor binding                          | 1/292 | 233 | 837  | 138  | 1 |
|    | 122                                                                   |       | 28  | 274  | 184  |   |
|    | GO:                                                                   |       | 10/ | 0.11 | 0.08 |   |
| BP | 1902 regulation of hematopoietic stem cell proliferation              | 1/292 | 233 | 837  | 138  | 1 |
|    | 033                                                                   |       | 28  | 274  | 184  |   |
|    | GO:                                                                   |       | 10/ | 0.11 | 0.08 |   |
| BP | 1902 regulation of lens fiber cell differentiation                    | 1/292 | 233 | 837  | 138  | 1 |
|    | 746                                                                   |       | 28  | 274  | 184  |   |
|    | GO: regulation of aspartic-type endopeptidase                         |       | 10/ | 0.11 | 0.08 |   |
| BP | 1902 activity involved in amyloid precursor protein catabolic process | 1/292 | 233 | 837  | 138  | 1 |
|    | 959                                                                   |       | 28  | 274  | 184  |   |
|    | GO:                                                                   |       | 10/ | 0.11 | 0.08 |   |
| BP | 1903 positive regulation of oxidative stress-induced neuron death     | 1/292 | 233 | 837  | 138  | 1 |
|    | 223                                                                   |       | 28  | 274  | 184  |   |
|    | GO:                                                                   |       | 10/ | 0.11 | 0.08 |   |
| BP | 1905 negative regulation of macrophage migration                      | 1/292 | 233 | 837  | 138  | 1 |
|    | 522                                                                   |       | 28  | 274  | 184  |   |
|    | GO:                                                                   |       | 10/ | 0.11 | 0.08 |   |
| BP | 1990 neuron projection maintenance                                    | 1/292 | 233 | 837  | 138  | 1 |
|    | 535                                                                   |       | 28  | 274  | 184  |   |
|    | GO:                                                                   |       | 10/ | 0.11 | 0.08 |   |
| BP | 2000 regulation of macrophage apoptotic process                       | 1/292 | 233 | 837  | 138  | 1 |
|    | 109                                                                   |       | 28  | 274  | 184  |   |

|    |      |                                                |       |     |      |      |   |
|----|------|------------------------------------------------|-------|-----|------|------|---|
|    | GO:  |                                                |       | 10/ | 0.11 | 0.08 |   |
| BP | 2000 | positive regulation of T-helper 17 type        | 1/292 | 233 | 837  | 138  | 1 |
|    | 318  | immune response                                |       | 28  | 274  | 184  |   |
|    | GO:  |                                                |       | 10/ | 0.11 | 0.08 |   |
| BP | 2000 | positive regulation of neutrophil              | 1/292 | 233 | 837  | 138  | 1 |
|    | 391  | extravasation                                  |       | 28  | 274  | 184  |   |
|    | GO:  |                                                |       | 10/ | 0.11 | 0.08 |   |
| BP | 2000 | positive regulation of cellular senescence     | 1/292 | 233 | 837  | 138  | 1 |
|    | 774  |                                                |       | 28  | 274  | 184  |   |
|    | GO:  |                                                |       | 207 | 0.11 | 0.08 |   |
| BP | 0006 | negative regulation of protein kinase activity | 5/292 | /23 | 916  | 189  | 5 |
|    | 469  |                                                |       | 328 | 85   | 841  |   |
|    | GO:  |                                                |       | 96/ | 0.11 | 0.08 |   |
| BP | 0030 | positive regulation of actin filament          | 3/292 | 233 | 940  | 193  | 3 |
|    | 838  | polymerization                                 |       | 28  | 809  | 176  |   |
|    | GO:  |                                                |       | 96/ | 0.11 | 0.08 |   |
| BP | 0045 | negative regulation of myeloid cell            | 3/292 | 233 | 940  | 193  | 3 |
|    | 638  | differentiation                                |       | 28  | 809  | 176  |   |
|    | GO:  |                                                |       | 96/ | 0.11 | 0.08 |   |
| BP | 0060 | regulation of dendritic spine development      | 3/292 | 233 | 940  | 193  | 3 |
|    | 998  |                                                |       | 28  | 809  | 176  |   |
|    | GO:  |                                                |       | 96/ | 0.11 | 0.08 |   |
| BP | 1903 | regulation of ATP metabolic process            | 3/292 | 233 | 940  | 193  | 3 |
|    | 578  |                                                |       | 28  | 809  | 176  |   |
|    | GO:  |                                                |       | 391 | 0.11 | 0.08 |   |
| BP | 0044 | cellular nitrogen compound catabolic           | 8/292 | /23 | 943  | 193  | 8 |
|    | 270  | process                                        |       | 328 | 903  | 176  |   |
|    | GO:  |                                                |       | 48/ | 0.12 | 0.08 |   |
| BP | 0006 | regulation of glycolytic process               | 2/292 | 233 | 119  | 298  | 2 |
|    | 110  |                                                |       | 28  | 441  | 167  |   |
|    | GO:  |                                                |       | 48/ | 0.12 | 0.08 |   |
| BP | 0019 | reproductive behavior                          | 2/292 | 233 | 119  | 298  | 2 |
|    | 098  |                                                |       | 28  | 441  | 167  |   |
|    | GO:  |                                                |       | 48/ | 0.12 | 0.08 |   |
| BP | 0046 | regulation of viral entry into host cell       | 2/292 | 233 | 119  | 298  | 2 |
|    | 596  |                                                |       | 28  | 441  | 167  |   |
|    | GO:  |                                                |       | 48/ | 0.12 | 0.08 |   |
| BP | 1903 | regulation of actin filament-based             | 2/292 | 233 | 119  | 298  | 2 |
|    | 115  | movement                                       |       | 28  | 441  | 167  |   |
|    | GO:  |                                                |       | 48/ | 0.12 | 0.08 |   |
| BP | 1903 | positive regulation of ATP metabolic process   | 2/292 | 233 | 119  | 298  | 2 |
|    | 580  |                                                |       | 28  | 441  | 167  |   |

|    |                                                     |       |     |      |      |   |
|----|-----------------------------------------------------|-------|-----|------|------|---|
|    | GO:                                                 |       | 97/ | 0.12 | 0.08 |   |
| BP | 0010 regulation of muscle cell apoptotic process    | 3/292 | 233 | 214  | 360  | 3 |
|    | 660                                                 |       | 28  | 379  | 068  |   |
|    | GO:                                                 |       | 332 | 0.12 | 0.08 |   |
| BP | 0009 glycoprotein metabolic process                 | 7/292 | /23 | 471  | 533  | 7 |
|    | 100                                                 |       | 328 | 916  | 173  |   |
|    | GO:                                                 |       | 98/ | 0.12 | 0.08 |   |
| BP | 0030 regulation of BMP signaling pathway            | 3/292 | 233 | 490  | 536  | 3 |
|    | 510                                                 |       | 28  | 233  | 21   |   |
|    | GO:                                                 |       | 98/ | 0.12 | 0.08 |   |
| BP | 0045 negative regulation of lipid metabolic process | 3/292 | 233 | 490  | 536  | 3 |
|    | 833                                                 |       | 28  | 233  | 21   |   |
|    | GO:                                                 |       | 98/ | 0.12 | 0.08 |   |
| BP | 0099 chemical synaptic transmission, postsynaptic   | 3/292 | 233 | 490  | 536  | 3 |
|    | 565                                                 |       | 28  | 233  | 21   |   |
|    | GO:                                                 |       | 49/ | 0.12 | 0.08 |   |
| BP | 0043 amino acid import                              | 2/292 | 233 | 535  | 551  | 2 |
|    | 090                                                 |       | 28  | 512  | 319  |   |
|    | GO:                                                 |       | 49/ | 0.12 | 0.08 |   |
| BP | 0048 mRNA stabilization                             | 2/292 | 233 | 535  | 551  | 2 |
|    | 255                                                 |       | 28  | 512  | 319  |   |
|    | GO:                                                 |       | 49/ | 0.12 | 0.08 |   |
| BP | 0090 cochlea development                            | 2/292 | 233 | 535  | 551  | 2 |
|    | 102                                                 |       | 28  | 512  | 319  |   |
|    | GO:                                                 |       | 49/ | 0.12 | 0.08 |   |
| BP | 0090 regulation of triglyceride metabolic process   | 2/292 | 233 | 535  | 551  | 2 |
|    | 207                                                 |       | 28  | 512  | 319  |   |
|    | GO:                                                 |       | 49/ | 0.12 | 0.08 |   |
| BP | 0090 regulation of cell aging                       | 2/292 | 233 | 535  | 551  | 2 |
|    | 342                                                 |       | 28  | 512  | 319  |   |
|    | GO:                                                 |       | 397 | 0.12 | 0.08 |   |
| BP | 0046 heterocycle catabolic process                  | 8/292 | /23 | 705  | 655  | 8 |
|    | 700                                                 |       | 328 | 155  | 343  |   |
|    | GO:                                                 |       | 99/ | 0.12 | 0.08 |   |
| BP | 0006 xenobiotic metabolic process                   | 3/292 | 233 | 768  | 655  | 3 |
|    | 805                                                 |       | 28  | 33   | 343  |   |
|    | GO:                                                 |       | 99/ | 0.12 | 0.08 |   |
| BP | 0046 ADP metabolic process                          | 3/292 | 233 | 768  | 655  | 3 |
|    | 031                                                 |       | 28  | 33   | 343  |   |
|    | GO:                                                 |       | 11/ | 0.12 | 0.08 |   |
| BP | 0001 establishment of lymphocyte polarity           | 1/292 | 233 | 941  | 655  | 1 |
|    | 767                                                 |       | 28  | 293  | 343  |   |

|    |                                                     |       |     |      |      |   |
|----|-----------------------------------------------------|-------|-----|------|------|---|
|    | GO:                                                 |       | 11/ | 0.12 | 0.08 |   |
| BP | 0001 establishment of T cell polarity               | 1/292 | 233 | 941  | 655  | 1 |
|    | 768                                                 |       | 28  | 293  | 343  |   |
|    | GO:                                                 |       | 11/ | 0.12 | 0.08 |   |
| BP | 0002 regulation of humoral immune response          | 1/292 | 233 | 941  | 655  | 1 |
|    | 923 mediated by circulating immunoglobulin          |       | 28  | 293  | 343  |   |
|    | GO:                                                 |       | 11/ | 0.12 | 0.08 |   |
| BP | 0003 secondary heart field specification            | 1/292 | 233 | 941  | 655  | 1 |
|    | 139                                                 |       | 28  | 293  | 343  |   |
|    | GO:                                                 |       | 11/ | 0.12 | 0.08 |   |
| BP | 0006 tryptophan metabolic process                   | 1/292 | 233 | 941  | 655  | 1 |
|    | 568                                                 |       | 28  | 293  | 343  |   |
|    | GO:                                                 |       | 11/ | 0.12 | 0.08 |   |
| BP | 0006 indolalkylamine metabolic process              | 1/292 | 233 | 941  | 655  | 1 |
|    | 586                                                 |       | 28  | 293  | 343  |   |
|    | GO:                                                 |       | 11/ | 0.12 | 0.08 |   |
| BP | 0014 Schwann cell proliferation                     | 1/292 | 233 | 941  | 655  | 1 |
|    | 010                                                 |       | 28  | 293  | 343  |   |
|    | GO:                                                 |       | 11/ | 0.12 | 0.08 |   |
| BP | 0015 heme transport                                 | 1/292 | 233 | 941  | 655  | 1 |
|    | 886                                                 |       | 28  | 293  | 343  |   |
|    | GO:                                                 |       | 11/ | 0.12 | 0.08 |   |
| BP | 0019 urea metabolic process                         | 1/292 | 233 | 941  | 655  | 1 |
|    | 627                                                 |       | 28  | 293  | 343  |   |
|    | GO:                                                 |       | 11/ | 0.12 | 0.08 |   |
| BP | 0021 positive regulation of cerebellar granule cell | 1/292 | 233 | 941  | 655  | 1 |
|    | 940 precursor proliferation                         |       | 28  | 293  | 343  |   |
|    | GO:                                                 |       | 11/ | 0.12 | 0.08 |   |
| BP | 0031 primary miRNA processing                       | 1/292 | 233 | 941  | 655  | 1 |
|    | 053                                                 |       | 28  | 293  | 343  |   |
|    | GO:                                                 |       | 11/ | 0.12 | 0.08 |   |
| BP | 0031 post-embryonic camera-type eye                 | 1/292 | 233 | 941  | 655  | 1 |
|    | 077 development                                     |       | 28  | 293  | 343  |   |
|    | GO:                                                 |       | 11/ | 0.12 | 0.08 |   |
| BP | 0031 negative regulation of myelination             | 1/292 | 233 | 941  | 655  | 1 |
|    | 642                                                 |       | 28  | 293  | 343  |   |
|    | GO:                                                 |       | 11/ | 0.12 | 0.08 |   |
| BP | 0033 regulation of immature T cell proliferation in | 1/292 | 233 | 941  | 655  | 1 |
|    | 084 thymus                                          |       | 28  | 293  | 343  |   |
|    | GO:                                                 |       | 11/ | 0.12 | 0.08 |   |
| BP | 0033 positive regulation of integrin activation     | 1/292 | 233 | 941  | 655  | 1 |
|    | 625                                                 |       | 28  | 293  | 343  |   |

|    |      |                                            |       |     |      |      |   |
|----|------|--------------------------------------------|-------|-----|------|------|---|
|    | GO:  |                                            |       | 11/ | 0.12 | 0.08 |   |
| BP | 0035 | common myeloid progenitor cell             | 1/292 | 233 | 941  | 655  | 1 |
|    | 726  | proliferation                              |       | 28  | 293  | 343  |   |
|    | GO:  |                                            |       | 11/ | 0.12 | 0.08 |   |
| BP | 0036 | response to macrophage colony-stimulating  | 1/292 | 233 | 941  | 655  | 1 |
|    | 005  | factor                                     |       | 28  | 293  | 343  |   |
|    | GO:  |                                            |       | 11/ | 0.12 | 0.08 |   |
| BP | 0036 | cellular response to macrophage colony-    | 1/292 | 233 | 941  | 655  | 1 |
|    | 006  | stimulating factor stimulus                |       | 28  | 293  | 343  |   |
|    | GO:  |                                            |       | 11/ | 0.12 | 0.08 |   |
| BP | 0036 | germ cell proliferation                    | 1/292 | 233 | 941  | 655  | 1 |
|    | 093  |                                            |       | 28  | 293  | 343  |   |
|    | GO:  | regulation of transcription from RNA       |       | 11/ | 0.12 | 0.08 |   |
| BP | 0043 | polymerase II promoter in response to      | 1/292 | 233 | 941  | 655  | 1 |
|    | 619  | oxidative stress                           |       | 28  | 293  | 343  |   |
|    | GO:  |                                            |       | 11/ | 0.12 | 0.08 |   |
| BP | 0045 | regulation of female receptivity           | 1/292 | 233 | 941  | 655  | 1 |
|    | 924  |                                            |       | 28  | 293  | 343  |   |
|    | GO:  |                                            |       | 11/ | 0.12 | 0.08 |   |
| BP | 0048 | post-embryonic animal organ                | 1/292 | 233 | 941  | 655  | 1 |
|    | 563  | morphogenesis                              |       | 28  | 293  | 343  |   |
|    | GO:  |                                            |       | 11/ | 0.12 | 0.08 |   |
| BP | 0048 | embryonic foregut morphogenesis            | 1/292 | 233 | 941  | 655  | 1 |
|    | 617  |                                            |       | 28  | 293  | 343  |   |
|    | GO:  |                                            |       | 11/ | 0.12 | 0.08 |   |
| BP | 0048 | skeletal muscle tissue growth              | 1/292 | 233 | 941  | 655  | 1 |
|    | 630  |                                            |       | 28  | 293  | 343  |   |
|    | GO:  |                                            |       | 11/ | 0.12 | 0.08 |   |
| BP | 0048 | venous blood vessel morphogenesis          | 1/292 | 233 | 941  | 655  | 1 |
|    | 845  |                                            |       | 28  | 293  | 343  |   |
|    | GO:  |                                            |       | 11/ | 0.12 | 0.08 |   |
| BP | 0051 | corticotropin secretion                    | 1/292 | 233 | 941  | 655  | 1 |
|    | 458  |                                            |       | 28  | 293  | 343  |   |
|    | GO:  |                                            |       | 11/ | 0.12 | 0.08 |   |
| BP | 0060 | mammary gland involution                   | 1/292 | 233 | 941  | 655  | 1 |
|    | 056  |                                            |       | 28  | 293  | 343  |   |
|    | GO:  |                                            |       | 11/ | 0.12 | 0.08 |   |
| BP | 0061 | cardiac neural crest cell development      | 1/292 | 233 | 941  | 655  | 1 |
|    | 309  | involved in outflow tract morphogenesis    |       | 28  | 293  | 343  |   |
|    | GO:  |                                            |       | 11/ | 0.12 | 0.08 |   |
| BP | 0061 | positive regulation of triglyceride lipase | 1/292 | 233 | 941  | 655  | 1 |
|    | 365  | activity                                   |       | 28  | 293  | 343  |   |



|    |      |                                              |       |      |      |       |
|----|------|----------------------------------------------|-------|------|------|-------|
|    | GO:  |                                              | 11/   | 0.12 | 0.08 |       |
| BP | 0061 | reticulophagy                                | 1/292 | 233  | 941  | 655 1 |
|    | 709  |                                              |       | 28   | 293  | 343   |
|    | GO:  |                                              | 11/   | 0.12 | 0.08 |       |
| BP | 0070 | thrombin-activated receptor signaling        | 1/292 | 233  | 941  | 655 1 |
|    | 493  | pathway                                      |       | 28   | 293  | 343   |
|    | GO:  |                                              | 11/   | 0.12 | 0.08 |       |
| BP | 0071 | otic vesicle morphogenesis                   | 1/292 | 233  | 941  | 655 1 |
|    | 600  |                                              |       | 28   | 293  | 343   |
|    | GO:  |                                              | 11/   | 0.12 | 0.08 |       |
| BP | 0071 | positive regulation of cell proliferation in | 1/292 | 233  | 941  | 655 1 |
|    | 864  | bone marrow                                  |       | 28   | 293  | 343   |
|    | GO:  |                                              | 11/   | 0.12 | 0.08 |       |
| BP | 0071 | macrophage apoptotic process                 | 1/292 | 233  | 941  | 655 1 |
|    | 888  |                                              |       | 28   | 293  | 343   |
|    | GO:  |                                              | 11/   | 0.12 | 0.08 |       |
| BP | 0072 | mesonephric tubule formation                 | 1/292 | 233  | 941  | 655 1 |
|    | 172  |                                              |       | 28   | 293  | 343   |
|    | GO:  |                                              | 11/   | 0.12 | 0.08 |       |
| BP | 0072 | regulation of nephron tubule epithelial cell | 1/292 | 233  | 941  | 655 1 |
|    | 182  | differentiation                              |       | 28   | 293  | 343   |
|    | GO:  |                                              | 11/   | 0.12 | 0.08 |       |
| BP | 0097 | complement-dependent cytotoxicity            | 1/292 | 233  | 941  | 655 1 |
|    | 278  |                                              |       | 28   | 293  | 343   |
|    | GO:  |                                              | 11/   | 0.12 | 0.08 |       |
| BP | 1901 | positive regulation of response to reactive  | 1/292 | 233  | 941  | 655 1 |
|    | 033  | oxygen species                               |       | 28   | 293  | 343   |
|    | GO:  |                                              | 11/   | 0.12 | 0.08 |       |
| BP | 1901 | insulin metabolic process                    | 1/292 | 233  | 941  | 655 1 |
|    | 142  |                                              |       | 28   | 293  | 343   |
|    | GO:  | negative regulation of intrinsic apoptotic   |       | 11/  | 0.12 | 0.08  |
| BP | 1902 | signaling pathway in response to DNA         | 1/292 | 233  | 941  | 655 1 |
|    | 166  | damage by p53 class mediator                 |       | 28   | 293  | 343   |
|    | GO:  | positive regulation of intrinsic apoptotic   |       | 11/  | 0.12 | 0.08  |
| BP | 1902 | signaling pathway in response to DNA         | 1/292 | 233  | 941  | 655 1 |
|    | 231  | damage                                       |       | 28   | 293  | 343   |
|    | GO:  |                                              | 11/   | 0.12 | 0.08 |       |
| BP | 1902 | negative regulation of cellular response to  | 1/292 | 233  | 941  | 655 1 |
|    | 548  | vascular endothelial growth factor stimulus  |       | 28   | 293  | 343   |
|    | GO:  |                                              | 11/   | 0.12 | 0.08 |       |
| BP | 1903 | positive regulation of receptor clustering   | 1/292 | 233  | 941  | 655 1 |
|    | 911  |                                              |       | 28   | 293  | 343   |

|    |      |                                                   |       |      |      |     |   |
|----|------|---------------------------------------------------|-------|------|------|-----|---|
|    | GO:  |                                                   | 11/   | 0.12 | 0.08 |     |   |
| BP | 1904 | positive regulation of sensory perception of pain | 1/292 | 233  | 941  | 655 | 1 |
|    | 058  |                                                   |       | 28   | 293  | 343 |   |
|    | GO:  |                                                   | 11/   | 0.12 | 0.08 |     |   |
| BP | 1904 | regulation of intestinal lipid absorption         | 1/292 | 233  | 941  | 655 | 1 |
|    | 729  |                                                   |       | 28   | 293  | 343 |   |
|    | GO:  |                                                   | 11/   | 0.12 | 0.08 |     |   |
| BP | 1905 | regulation of aspartic-type peptidase activity    | 1/292 | 233  | 941  | 655 | 1 |
|    | 245  |                                                   |       | 28   | 293  | 343 |   |
|    | GO:  |                                                   | 11/   | 0.12 | 0.08 |     |   |
| BP | 2000 | regulation of removal of superoxide radicals      | 1/292 | 233  | 941  | 655 | 1 |
|    | 121  |                                                   |       | 28   | 293  | 343 |   |
|    | GO:  |                                                   | 11/   | 0.12 | 0.08 |     |   |
| BP | 2000 | regulation of neutrophil extravasation            | 1/292 | 233  | 941  | 655 | 1 |
|    | 389  |                                                   |       | 28   | 293  | 343 |   |
|    | GO:  |                                                   | 11/   | 0.12 | 0.08 |     |   |
| BP | 2000 | positive regulation of autophagosome assembly     | 1/292 | 233  | 941  | 655 | 1 |
|    | 786  |                                                   |       | 28   | 293  | 343 |   |
|    | GO:  |                                                   | 11/   | 0.12 | 0.08 |     |   |
| BP | 2001 | regulation of osteoclast development              | 1/292 | 233  | 941  | 655 | 1 |
|    | 204  |                                                   |       | 28   | 293  | 343 |   |
|    | GO:  |                                                   | 11/   | 0.12 | 0.08 |     |   |
| BP | 2001 | positive regulation of vasculogenesis             | 1/292 | 233  | 941  | 655 | 1 |
|    | 214  |                                                   |       | 28   | 293  | 343 |   |
|    | GO:  |                                                   | 50/   | 0.12 | 0.08 |     |   |
| BP | 0021 | cranial nerve development                         | 2/292 | 233  | 954  | 658 | 2 |
|    | 545  |                                                   |       | 28   | 959  | 206 |   |
|    | GO:  |                                                   | 50/   | 0.12 | 0.08 |     |   |
| BP | 1902 | L-alpha-amino acid transmembrane transport        | 2/292 | 233  | 954  | 658 | 2 |
|    | 475  |                                                   |       | 28   | 959  | 206 |   |
|    | GO:  |                                                   | 155   | 0.13 | 0.08 |     |   |
| BP | 0006 | protein folding                                   | 4/292 | /23  | 044  | 711 | 4 |
|    | 457  |                                                   |       | 328  | 361  | 646 |   |
|    | GO:  |                                                   | 155   | 0.13 | 0.08 |     |   |
| BP | 0071 | cellular response to carbohydrate stimulus        | 4/292 | /23  | 044  | 711 | 4 |
|    | 322  |                                                   |       | 328  | 361  | 646 |   |
|    | GO:  |                                                   | 214   | 0.13 | 0.08 |     |   |
| BP | 0032 | protein-containing complex disassembly            | 5/292 | /23  | 179  | 798 | 5 |
|    | 984  |                                                   |       | 328  | 686  | 839 |   |
|    | GO:  |                                                   | 156   | 0.13 | 0.08 |     |   |
| BP | 0007 | smoothened signaling pathway                      | 4/292 | /23  | 264  | 849 | 4 |
|    | 224  |                                                   |       | 328  | 499  | 057 |   |

|    |                                                                      |       |     |      |      |   |
|----|----------------------------------------------------------------------|-------|-----|------|------|---|
|    | GO:                                                                  |       | 156 | 0.13 | 0.08 |   |
| BP | 0071 cellular response to metal ion                                  | 4/292 | /23 | 264  | 849  | 4 |
|    | 248                                                                  |       | 328 | 499  | 057  |   |
|    | GO:                                                                  |       | 101 | 0.13 | 0.08 |   |
| BP | 0071 cellular response to hypoxia                                    | 3/292 | /23 | 331  | 890  | 3 |
|    | 456                                                                  |       | 328 | 092  | 269  |   |
|    | GO:                                                                  |       | 215 | 0.13 | 0.08 |   |
| BP | 0008 actin polymerization or depolymerization                        | 5/292 | /23 | 364  | 908  | 5 |
|    | 154                                                                  |       | 328 | 869  | 428  |   |
|    | GO:                                                                  |       | 51/ | 0.13 | 0.08 |   |
| BP | 0032 regulation of chondrocyte differentiation                       | 2/292 | 233 | 377  | 908  | 2 |
|    | 330                                                                  |       | 28  | 634  | 428  |   |
|    | GO:                                                                  |       | 51/ | 0.13 | 0.08 |   |
| BP | 0043 regulation of DNA-templated transcription in response to stress | 2/292 | 233 | 377  | 908  | 2 |
|    | 620                                                                  |       | 28  | 634  | 428  |   |
|    | GO:                                                                  |       | 51/ | 0.13 | 0.08 |   |
| BP | 0060 lung epithelium development                                     | 2/292 | 233 | 377  | 908  | 2 |
|    | 428                                                                  |       | 28  | 634  | 428  |   |
|    | GO:                                                                  |       | 157 | 0.13 | 0.08 |   |
| BP | 0021 pallium development                                             | 4/292 | /23 | 486  | 970  | 4 |
|    | 543                                                                  |       | 328 | 165  | 989  |   |
|    | GO:                                                                  |       | 157 | 0.13 | 0.08 |   |
| BP | 0045 cellular respiration                                            | 4/292 | /23 | 486  | 970  | 4 |
|    | 333                                                                  |       | 328 | 165  | 989  |   |
|    | GO:                                                                  |       | 157 | 0.13 | 0.08 |   |
| BP | 1903 negative regulation of hemopoiesis                              | 4/292 | /23 | 486  | 970  | 4 |
|    | 707                                                                  |       | 328 | 165  | 989  |   |
|    | GO:                                                                  |       | 277 | 0.13 | 0.09 |   |
| BP | 0050 regulation of synapse organization                              | 6/292 | /23 | 562  | 018  | 6 |
|    | 807                                                                  |       | 328 | 096  | 247  |   |
|    | GO:                                                                  |       | 102 | 0.13 | 0.09 |   |
| BP | 0010 muscle cell apoptotic process                                   | 3/292 | /23 | 615  | 047  | 3 |
|    | 657                                                                  |       | 328 | 675  | 354  |   |
|    | GO:                                                                  |       | 102 | 0.13 | 0.09 |   |
| BP | 1901 positive regulation of cell cycle phase transition              | 3/292 | /23 | 615  | 047  | 3 |
|    | 989                                                                  |       | 328 | 675  | 354  |   |
|    | GO:                                                                  |       | 52/ | 0.13 | 0.09 |   |
| BP | 0042 inner ear auditory receptor cell differentiation                | 2/292 | 233 | 803  | 132  | 2 |
|    | 491                                                                  |       | 28  | 391  | 936  |   |
|    | GO:                                                                  |       | 103 | 0.13 | 0.09 |   |
| BP | 0030 cellular monovalent inorganic cation homeostasis                | 3/292 | /23 | 902  | 132  | 3 |
|    | 004                                                                  |       | 328 | 337  | 936  |   |

|    |                                                                       |       |     |      |      |   |
|----|-----------------------------------------------------------------------|-------|-----|------|------|---|
|    | GO:                                                                   |       | 103 | 0.13 | 0.09 |   |
| BP | 0048 oogenesis                                                        | 3/292 | /23 | 902  | 132  | 3 |
|    | 477                                                                   |       | 328 | 337  | 936  |   |
|    | GO:                                                                   |       | 103 | 0.13 | 0.09 |   |
| BP | 0071 cellular response to xenobiotic stimulus                         | 3/292 | /23 | 902  | 132  | 3 |
|    | 466                                                                   |       | 328 | 337  | 936  |   |
|    | GO:                                                                   |       | 12/ | 0.14 | 0.09 |   |
| BP | 0003 heart induction                                                  | 1/292 | 233 | 031  | 132  | 1 |
|    | 129                                                                   |       | 28  | 534  | 936  |   |
|    | GO:                                                                   |       | 12/ | 0.14 | 0.09 |   |
| BP | 0006 pyrimidine nucleoside metabolic process                          | 1/292 | 233 | 031  | 132  | 1 |
|    | 213                                                                   |       | 28  | 534  | 936  |   |
|    | GO:                                                                   |       | 12/ | 0.14 | 0.09 |   |
| BP | 0007 foregut morphogenesis                                            | 1/292 | 233 | 031  | 132  | 1 |
|    | 440                                                                   |       | 28  | 534  | 936  |   |
|    | GO:                                                                   |       | 12/ | 0.14 | 0.09 |   |
| BP | 0007 mesodermal cell fate specification                               | 1/292 | 233 | 031  | 132  | 1 |
|    | 501                                                                   |       | 28  | 534  | 936  |   |
|    | GO:                                                                   |       | 12/ | 0.14 | 0.09 |   |
| BP | 0010 positive regulation of receptor biosynthetic process             | 1/292 | 233 | 031  | 132  | 1 |
|    | 870                                                                   |       | 28  | 534  | 936  |   |
|    | GO:                                                                   |       | 12/ | 0.14 | 0.09 |   |
| BP | 0010 regulation of cholesterol esterification                         | 1/292 | 233 | 031  | 132  | 1 |
|    | 872                                                                   |       | 28  | 534  | 936  |   |
|    | GO:                                                                   |       | 12/ | 0.14 | 0.09 |   |
| BP | 0014 urinary bladder smooth muscle contraction                        | 1/292 | 233 | 031  | 132  | 1 |
|    | 832                                                                   |       | 28  | 534  | 936  |   |
|    | GO:                                                                   |       | 12/ | 0.14 | 0.09 |   |
| BP | 0014 regulation of skeletal muscle satellite cell proliferation       | 1/292 | 233 | 031  | 132  | 1 |
|    | 842                                                                   |       | 28  | 534  | 936  |   |
|    | GO:                                                                   |       | 12/ | 0.14 | 0.09 |   |
| BP | 0014 response to stimulus involved in regulation of muscle adaptation | 1/292 | 233 | 031  | 132  | 1 |
|    | 874                                                                   |       | 28  | 534  | 936  |   |
|    | GO:                                                                   |       | 12/ | 0.14 | 0.09 |   |
| BP | 0032 luteinizing hormone secretion                                    | 1/292 | 233 | 031  | 132  | 1 |
|    | 275                                                                   |       | 28  | 534  | 936  |   |
|    | GO:                                                                   |       | 12/ | 0.14 | 0.09 |   |
| BP | 0032 interleukin-1 alpha production                                   | 1/292 | 233 | 031  | 132  | 1 |
|    | 610                                                                   |       | 28  | 534  | 936  |   |
|    | GO:                                                                   |       | 12/ | 0.14 | 0.09 |   |
| BP | 0032 positive regulation of natural killer cell differentiation       | 1/292 | 233 | 031  | 132  | 1 |
|    | 825                                                                   |       | 28  | 534  | 936  |   |

|    |                                                                                            |       |     |      |      |   |
|----|--------------------------------------------------------------------------------------------|-------|-----|------|------|---|
|    | GO:                                                                                        |       | 12/ | 0.14 | 0.09 |   |
| BP | 0033 negative regulation of mast cell activation                                           | 1/292 | 233 | 031  | 132  | 1 |
|    | 004                                                                                        |       | 28  | 534  | 936  |   |
|    | GO:                                                                                        |       | 12/ | 0.14 | 0.09 |   |
| BP | 0033 immature T cell proliferation in thymus                                               | 1/292 | 233 | 031  | 132  | 1 |
|    | 080                                                                                        |       | 28  | 534  | 936  |   |
|    | GO:                                                                                        |       | 12/ | 0.14 | 0.09 |   |
| BP | 0033 leptin-mediated signaling pathway                                                     | 1/292 | 233 | 031  | 132  | 1 |
|    | 210                                                                                        |       | 28  | 534  | 936  |   |
|    | GO:                                                                                        |       | 12/ | 0.14 | 0.09 |   |
| BP | 0033 regulation of cell-cell adhesion mediated by integrin                                 | 1/292 | 233 | 031  | 132  | 1 |
|    | 632                                                                                        |       | 28  | 534  | 936  |   |
|    | GO:                                                                                        |       | 12/ | 0.14 | 0.09 |   |
| BP | 0035 maintenance of protein localization in endoplasmic reticulum                          | 1/292 | 233 | 031  | 132  | 1 |
|    | 437                                                                                        |       | 28  | 534  | 936  |   |
|    | GO:                                                                                        |       | 12/ | 0.14 | 0.09 |   |
| BP | 0042 mRNA transcription by RNA polymerase II                                               | 1/292 | 233 | 031  | 132  | 1 |
|    | 789                                                                                        |       | 28  | 534  | 936  |   |
|    | GO:                                                                                        |       | 12/ | 0.14 | 0.09 |   |
| BP | 0043 regulation of secondary metabolic process                                             | 1/292 | 233 | 031  | 132  | 1 |
|    | 455                                                                                        |       | 28  | 534  | 936  |   |
|    | GO:                                                                                        |       | 12/ | 0.14 | 0.09 |   |
| BP | 0043 negative regulation by host of viral transcription                                    | 1/292 | 233 | 031  | 132  | 1 |
|    | 922                                                                                        |       | 28  | 534  | 936  |   |
|    | GO:                                                                                        |       | 12/ | 0.14 | 0.09 |   |
| BP | 0045 positive regulation of MHC class II biosynthetic process                              | 1/292 | 233 | 031  | 132  | 1 |
|    | 348                                                                                        |       | 28  | 534  | 936  |   |
|    | GO:                                                                                        |       | 12/ | 0.14 | 0.09 |   |
| BP | 0045 regulation of gamma-delta T cell differentiation                                      | 1/292 | 233 | 031  | 132  | 1 |
|    | 586                                                                                        |       | 28  | 534  | 936  |   |
|    | GO:                                                                                        |       | 12/ | 0.14 | 0.09 |   |
| BP | 0045 positive regulation of RNA polymerase II transcription preinitiation complex assembly | 1/292 | 233 | 031  | 132  | 1 |
|    | 899                                                                                        |       | 28  | 534  | 936  |   |
|    | GO:                                                                                        |       | 12/ | 0.14 | 0.09 |   |
| BP | 0046 regulation of gamma-delta T cell activation                                           | 1/292 | 233 | 031  | 132  | 1 |
|    | 643                                                                                        |       | 28  | 534  | 936  |   |
|    | GO:                                                                                        |       | 12/ | 0.14 | 0.09 |   |
| BP | 0048 regulation of melanin biosynthetic process                                            | 1/292 | 233 | 031  | 132  | 1 |
|    | 021                                                                                        |       | 28  | 534  | 936  |   |
|    | GO:                                                                                        |       | 12/ | 0.14 | 0.09 |   |
| BP | 0048 epinephrine transport                                                                 | 1/292 | 233 | 031  | 132  | 1 |
|    | 241                                                                                        |       | 28  | 534  | 936  |   |

|    |                                                                          |       |     |      |      |   |
|----|--------------------------------------------------------------------------|-------|-----|------|------|---|
|    | GO:                                                                      |       | 12/ | 0.14 | 0.09 |   |
| BP | 0048 notochord morphogenesis                                             | 1/292 | 233 | 031  | 132  | 1 |
|    | 570                                                                      |       | 28  | 534  | 936  |   |
|    | GO:                                                                      |       | 12/ | 0.14 | 0.09 |   |
| BP | 0060 micturition                                                         | 1/292 | 233 | 031  | 132  | 1 |
|    | 073                                                                      |       | 28  | 534  | 936  |   |
|    | GO:                                                                      |       | 12/ | 0.14 | 0.09 |   |
| BP | 0060 regulation of Fc receptor mediated<br>stimulatory signaling pathway | 1/292 | 233 | 031  | 132  | 1 |
|    | 368                                                                      |       | 28  | 534  | 936  |   |
|    | GO:                                                                      |       | 12/ | 0.14 | 0.09 |   |
| BP | 0060 bronchus development                                                | 1/292 | 233 | 031  | 132  | 1 |
|    | 433                                                                      |       | 28  | 534  | 936  |   |
|    | GO:                                                                      |       | 12/ | 0.14 | 0.09 |   |
| BP | 0060 trachea morphogenesis                                               | 1/292 | 233 | 031  | 132  | 1 |
|    | 439                                                                      |       | 28  | 534  | 936  |   |
|    | GO:                                                                      |       | 12/ | 0.14 | 0.09 |   |
| BP | 0060 regulation of gastric acid secretion                                | 1/292 | 233 | 031  | 132  | 1 |
|    | 453                                                                      |       | 28  | 534  | 936  |   |
|    | GO:                                                                      |       | 12/ | 0.14 | 0.09 |   |
| BP | 0060 prostate glandular acinus development                               | 1/292 | 233 | 031  | 132  | 1 |
|    | 525                                                                      |       | 28  | 534  | 936  |   |
|    | GO:                                                                      |       | 12/ | 0.14 | 0.09 |   |
| BP | 0060 cartilage morphogenesis                                             | 1/292 | 233 | 031  | 132  | 1 |
|    | 536                                                                      |       | 28  | 534  | 936  |   |
|    | GO:                                                                      |       | 12/ | 0.14 | 0.09 |   |
| BP | 0060 multicellular organismal iron ion homeostasis                       | 1/292 | 233 | 031  | 132  | 1 |
|    | 586                                                                      |       | 28  | 534  | 936  |   |
|    | GO:                                                                      |       | 12/ | 0.14 | 0.09 |   |
| BP | 0070 fat cell proliferation                                              | 1/292 | 233 | 031  | 132  | 1 |
|    | 341                                                                      |       | 28  | 534  | 936  |   |
|    | GO:                                                                      |       | 12/ | 0.14 | 0.09 |   |
| BP | 0070 regulation of fat cell proliferation                                | 1/292 | 233 | 031  | 132  | 1 |
|    | 344                                                                      |       | 28  | 534  | 936  |   |
|    | GO:                                                                      |       | 12/ | 0.14 | 0.09 |   |
| BP | 0070 regulation of uterine smooth muscle<br>contraction                  | 1/292 | 233 | 031  | 132  | 1 |
|    | 472                                                                      |       | 28  | 534  | 936  |   |
|    | GO:                                                                      |       | 12/ | 0.14 | 0.09 |   |
| BP | 0070 divalent metal ion export                                           | 1/292 | 233 | 031  | 132  | 1 |
|    | 839                                                                      |       | 28  | 534  | 936  |   |
|    | GO:                                                                      |       | 12/ | 0.14 | 0.09 |   |
| BP | 0071 regulation of cell proliferation in bone<br>marrow                  | 1/292 | 233 | 031  | 132  | 1 |
|    | 863                                                                      |       | 28  | 534  | 936  |   |

|    |                                                                     |       |     |      |      |   |
|----|---------------------------------------------------------------------|-------|-----|------|------|---|
|    | GO:                                                                 |       | 12/ | 0.14 | 0.09 |   |
| BP | 0071 nitrogen cycle metabolic process                               | 1/292 | 233 | 031  | 132  | 1 |
|    | 941                                                                 |       | 28  | 534  | 936  |   |
|    | GO:                                                                 |       | 12/ | 0.14 | 0.09 |   |
| BP | 0090 negative regulation of triglyceride metabolic process          | 1/292 | 233 | 031  | 132  | 1 |
|    | 209                                                                 |       | 28  | 534  | 936  |   |
|    | GO:                                                                 |       | 12/ | 0.14 | 0.09 |   |
| BP | 0090 positive regulation of cell aging                              | 1/292 | 233 | 031  | 132  | 1 |
|    | 343                                                                 |       | 28  | 534  | 936  |   |
|    | GO:                                                                 |       | 12/ | 0.14 | 0.09 |   |
| BP | 0090 establishment of endothelial intestinal barrier                | 1/292 | 233 | 031  | 132  | 1 |
|    | 557                                                                 |       | 28  | 534  | 936  |   |
|    | GO:                                                                 |       | 12/ | 0.14 | 0.09 |   |
| BP | 0098 asymmetric stem cell division                                  | 1/292 | 233 | 031  | 132  | 1 |
|    | 722                                                                 |       | 28  | 534  | 936  |   |
|    | GO:                                                                 |       | 12/ | 0.14 | 0.09 |   |
| BP | 0098 xenophagy                                                      | 1/292 | 233 | 031  | 132  | 1 |
|    | 792                                                                 |       | 28  | 534  | 936  |   |
|    | GO:                                                                 |       | 12/ | 0.14 | 0.09 |   |
| BP | 1900 negative regulation of long-term synaptic potentiation         | 1/292 | 233 | 031  | 132  | 1 |
|    | 272                                                                 |       | 28  | 534  | 936  |   |
|    | GO:                                                                 |       | 12/ | 0.14 | 0.09 |   |
| BP | 1900 regulation of secondary metabolite biosynthetic process        | 1/292 | 233 | 031  | 132  | 1 |
|    | 376                                                                 |       | 28  | 534  | 936  |   |
|    | GO:                                                                 |       | 12/ | 0.14 | 0.09 |   |
| BP | 1901 regulation of hydrogen peroxide-mediated programmed cell death | 1/292 | 233 | 031  | 132  | 1 |
|    | 298                                                                 |       | 28  | 534  | 936  |   |
|    | GO:                                                                 |       | 12/ | 0.14 | 0.09 |   |
| BP | 1902 regulation of apoptotic DNA fragmentation                      | 1/292 | 233 | 031  | 132  | 1 |
|    | 510                                                                 |       | 28  | 534  | 936  |   |
|    | GO:                                                                 |       | 12/ | 0.14 | 0.09 |   |
| BP | 1903 positive regulation of cell maturation                         | 1/292 | 233 | 031  | 132  | 1 |
|    | 431                                                                 |       | 28  | 534  | 936  |   |
|    | GO:                                                                 |       | 12/ | 0.14 | 0.09 |   |
| BP | 2000 positive regulation of DNA-dependent DNA replication           | 1/292 | 233 | 031  | 132  | 1 |
|    | 105                                                                 |       | 28  | 534  | 936  |   |
|    | GO:                                                                 |       | 12/ | 0.14 | 0.09 |   |
| BP | 2000 positive regulation of feeding behavior                        | 1/292 | 233 | 031  | 132  | 1 |
|    | 253                                                                 |       | 28  | 534  | 936  |   |
|    | GO:                                                                 |       | 12/ | 0.14 | 0.09 |   |
| BP | 2000 regulation of ceramide biosynthetic process                    | 1/292 | 233 | 031  | 132  | 1 |
|    | 303                                                                 |       | 28  | 534  | 936  |   |

|    |      |                                                           |       |     |      |      |   |
|----|------|-----------------------------------------------------------|-------|-----|------|------|---|
|    | GO:  |                                                           |       | 104 | 0.14 | 0.09 |   |
| BP | 0009 | purine nucleoside diphosphate metabolic process           | 3/292 | /23 | 191  | 223  | 3 |
|    | 135  |                                                           |       | 328 | 039  | 741  |   |
|    | GO:  |                                                           |       | 104 | 0.14 | 0.09 |   |
| BP | 0009 | purine ribonucleoside diphosphate metabolic process       | 3/292 | /23 | 191  | 223  | 3 |
|    | 179  |                                                           |       | 328 | 039  | 741  |   |
|    | GO:  |                                                           |       | 104 | 0.14 | 0.09 |   |
| BP | 0043 | regulation of mRNA stability                              | 3/292 | /23 | 191  | 223  | 3 |
|    | 488  |                                                           |       | 328 | 039  | 741  |   |
|    | GO:  |                                                           |       | 104 | 0.14 | 0.09 |   |
| BP | 0060 | bone morphogenesis                                        | 3/292 | /23 | 191  | 223  | 3 |
|    | 349  |                                                           |       | 328 | 039  | 741  |   |
|    | GO:  |                                                           |       | 53/ | 0.14 | 0.09 |   |
| BP | 0021 | cerebral cortex cell migration                            | 2/292 | 233 | 232  | 227  | 2 |
|    | 795  |                                                           |       | 28  | 088  | 669  |   |
|    | GO:  |                                                           |       | 53/ | 0.14 | 0.09 |   |
| BP | 0048 | oocyte development                                        | 2/292 | 233 | 232  | 227  | 2 |
|    | 599  |                                                           |       | 28  | 088  | 669  |   |
|    | GO:  |                                                           |       | 53/ | 0.14 | 0.09 |   |
| BP | 0048 | embryonic cranial skeleton morphogenesis                  | 2/292 | 233 | 232  | 227  | 2 |
|    | 701  |                                                           |       | 28  | 088  | 669  |   |
|    | GO:  |                                                           |       | 53/ | 0.14 | 0.09 |   |
| BP | 0048 | regulation of oligodendrocyte differentiation             | 2/292 | 233 | 232  | 227  | 2 |
|    | 713  |                                                           |       | 28  | 088  | 669  |   |
|    | GO:  |                                                           |       | 53/ | 0.14 | 0.09 |   |
| BP | 0050 | amyloid-beta metabolic process                            | 2/292 | 233 | 232  | 227  | 2 |
|    | 435  |                                                           |       | 28  | 088  | 669  |   |
|    | GO:  |                                                           |       | 53/ | 0.14 | 0.09 |   |
| BP | 0052 | modulation by symbiont of entry into host                 | 2/292 | 233 | 232  | 227  | 2 |
|    | 372  |                                                           |       | 28  | 088  | 669  |   |
|    | GO:  |                                                           |       | 53/ | 0.14 | 0.09 |   |
| BP | 2000 | regulation of transcription regulatory region DNA binding | 2/292 | 233 | 232  | 227  | 2 |
|    | 677  |                                                           |       | 28  | 088  | 669  |   |
|    | GO:  |                                                           |       | 410 | 0.14 | 0.09 |   |
| BP | 0034 | regulation of cellular amide metabolic process            | 8/292 | /23 | 438  | 358  | 8 |
|    | 248  |                                                           |       | 328 | 668  | 322  |   |
|    | GO:  |                                                           |       | 105 | 0.14 | 0.09 |   |
| BP | 0001 | cell fate specification                                   | 3/292 | /23 | 481  | 382  | 3 |
|    | 708  |                                                           |       | 328 | 738  | 941  |   |
|    | GO:  |                                                           |       | 221 | 0.14 | 0.09 |   |
| BP | 0010 | negative regulation of cell cycle process                 | 5/292 | /23 | 500  | 391  | 5 |
|    | 948  |                                                           |       | 328 | 155  | 576  |   |



|    |                                                                  |       |     |      |      |   |
|----|------------------------------------------------------------------|-------|-----|------|------|---|
|    | GO:                                                              |       | 411 | 0.14 | 0.09 |   |
| BP | 0019 aromatic compound catabolic process                         | 8/292 | /23 | 576  | 437  | 8 |
|    | 439                                                              |       | 328 | 668  | 821  |   |
|    | GO:                                                              |       | 54/ | 0.14 | 0.09 |   |
| BP | 0046 acid secretion                                              | 2/292 | 233 | 663  | 480  | 2 |
|    | 717                                                              |       | 28  | 584  | 789  |   |
|    | GO:                                                              |       | 54/ | 0.14 | 0.09 |   |
| BP | 0046 lipid phosphorylation                                       | 2/292 | 233 | 663  | 480  | 2 |
|    | 834                                                              |       | 28  | 584  | 789  |   |
|    | GO:                                                              |       | 54/ | 0.14 | 0.09 |   |
| BP | 0048 developmental pigmentation                                  | 2/292 | 233 | 663  | 480  | 2 |
|    | 066                                                              |       | 28  | 584  | 789  |   |
|    | GO:                                                              |       | 54/ | 0.14 | 0.09 |   |
| BP | 2000 regulation of sodium ion transmembrane transporter activity | 2/292 | 233 | 663  | 480  | 2 |
|    | 649                                                              |       | 28  | 584  | 789  |   |
|    | GO:                                                              |       | 284 | 0.14 | 0.09 |   |
| BP | 0060 canonical Wnt signaling pathway                             | 6/292 | /23 | 727  | 518  | 6 |
|    | 070                                                              |       | 328 | 602  | 845  |   |
|    | GO:                                                              |       | 106 | 0.14 | 0.09 |   |
| BP | 0000 transition metal ion transport                              | 3/292 | /23 | 774  | 539  | 3 |
|    | 041                                                              |       | 328 | 393  | 064  |   |
|    | GO:                                                              |       | 106 | 0.14 | 0.09 |   |
| BP | 0006 nucleoside diphosphate phosphorylation                      | 3/292 | /23 | 774  | 539  | 3 |
|    | 165                                                              |       | 328 | 393  | 064  |   |
|    | GO:                                                              |       | 106 | 0.14 | 0.09 |   |
| BP | 0035 segmentation                                                | 3/292 | /23 | 774  | 539  | 3 |
|    | 282                                                              |       | 328 | 393  | 064  |   |
|    | GO:                                                              |       | 107 | 0.15 | 0.09 |   |
| BP | 0030 intracellular steroid hormone receptor signaling pathway    | 3/292 | /23 | 068  | 593  | 3 |
|    | 518                                                              |       | 328 | 965  | 443  |   |
|    | GO:                                                              |       | 164 | 0.15 | 0.09 |   |
| BP | 0045 glycerolipid biosynthetic process                           | 4/292 | /23 | 079  | 593  | 4 |
|    | 017                                                              |       | 328 | 093  | 443  |   |
|    | GO:                                                              |       | 55/ | 0.15 | 0.09 |   |
| BP | 0010 regulation of cardiac muscle cell apoptotic process         | 2/292 | 233 | 097  | 593  | 2 |
|    | 665                                                              |       | 28  | 745  | 443  |   |
|    | GO:                                                              |       | 55/ | 0.15 | 0.09 |   |
| BP | 0035 social behavior                                             | 2/292 | 233 | 097  | 593  | 2 |
|    | 176                                                              |       | 28  | 745  | 443  |   |
|    | GO:                                                              |       | 55/ | 0.15 | 0.09 |   |
| BP | 0035 positive regulation of dephosphorylation                    | 2/292 | 233 | 097  | 593  | 2 |
|    | 306                                                              |       | 28  | 745  | 443  |   |

|    |                                                                  |       |     |      |      |   |
|----|------------------------------------------------------------------|-------|-----|------|------|---|
|    | GO:                                                              |       | 55/ | 0.15 | 0.09 |   |
| BP | 0045 regulation of epidermal cell differentiation                | 2/292 | 233 | 097  | 593  | 2 |
|    | 604                                                              |       | 28  | 745  | 443  |   |
|    | GO:                                                              |       | 13/ | 0.15 | 0.09 |   |
| BP | 0002 negative regulation of acute inflammatory response          | 1/292 | 233 | 108  | 593  | 1 |
|    | 674                                                              |       | 28  | 168  | 443  |   |
|    | GO:                                                              |       | 13/ | 0.15 | 0.09 |   |
| BP | 0002 regulation of dendritic cell cytokine production            | 1/292 | 233 | 108  | 593  | 1 |
|    | 730                                                              |       | 28  | 168  | 443  |   |
|    | GO:                                                              |       | 13/ | 0.15 | 0.09 |   |
| BP | 0003 regulation of glomerular filtration                         | 1/292 | 233 | 108  | 593  | 1 |
|    | 093                                                              |       | 28  | 168  | 443  |   |
|    | GO:                                                              |       | 13/ | 0.15 | 0.09 |   |
| BP | 0003 Wnt signaling pathway involved in heart development         | 1/292 | 233 | 108  | 593  | 1 |
|    | 306                                                              |       | 28  | 168  | 443  |   |
|    | GO:                                                              |       | 13/ | 0.15 | 0.09 |   |
| BP | 0006 ER overload response                                        | 1/292 | 233 | 108  | 593  | 1 |
|    | 983                                                              |       | 28  | 168  | 443  |   |
|    | GO:                                                              |       | 13/ | 0.15 | 0.09 |   |
| BP | 0007 SMAD protein complex assembly                               | 1/292 | 233 | 108  | 593  | 1 |
|    | 183                                                              |       | 28  | 168  | 443  |   |
|    | GO:                                                              |       | 13/ | 0.15 | 0.09 |   |
| BP | 0009 NAD biosynthetic process                                    | 1/292 | 233 | 108  | 593  | 1 |
|    | 435                                                              |       | 28  | 168  | 443  |   |
|    | GO:                                                              |       | 13/ | 0.15 | 0.09 |   |
| BP | 0010 positive regulation of keratinocyte proliferation           | 1/292 | 233 | 108  | 593  | 1 |
|    | 838                                                              |       | 28  | 168  | 443  |   |
|    | GO:                                                              |       | 13/ | 0.15 | 0.09 |   |
| BP | 0014 skeletal muscle satellite cell proliferation                | 1/292 | 233 | 108  | 593  | 1 |
|    | 841                                                              |       | 28  | 168  | 443  |   |
|    | GO:                                                              |       | 13/ | 0.15 | 0.09 |   |
| BP | 0032 low-density lipoprotein receptor particle metabolic process | 1/292 | 233 | 108  | 593  | 1 |
|    | 799                                                              |       | 28  | 168  | 443  |   |
|    | GO:                                                              |       | 13/ | 0.15 | 0.09 |   |
| BP | 0033 regulation of immature T cell proliferation                 | 1/292 | 233 | 108  | 593  | 1 |
|    | 083                                                              |       | 28  | 168  | 443  |   |
|    | GO:                                                              |       | 13/ | 0.15 | 0.09 |   |
| BP | 0033 regulation of nuclear cell cycle DNA replication            | 1/292 | 233 | 108  | 593  | 1 |
|    | 262                                                              |       | 28  | 168  | 443  |   |
|    | GO:                                                              |       | 13/ | 0.15 | 0.09 |   |
| BP | 0033 response to vitamin D                                       | 1/292 | 233 | 108  | 593  | 1 |
|    | 280                                                              |       | 28  | 168  | 443  |   |

|    |      |                                                                        |       |      |      |     |   |
|----|------|------------------------------------------------------------------------|-------|------|------|-----|---|
|    | GO:  |                                                                        | 13/   | 0.15 | 0.09 |     |   |
| BP | 0035 | bone mineralization involved in bone maturation                        | 1/292 | 233  | 108  | 593 | 1 |
|    | 630  |                                                                        |       | 28   | 168  | 443 |   |
|    | GO:  |                                                                        | 13/   | 0.15 | 0.09 |     |   |
| BP | 0038 | Fc-gamma receptor signaling pathway                                    | 1/292 | 233  | 108  | 593 | 1 |
|    | 094  |                                                                        |       | 28   | 168  | 443 |   |
|    | GO:  |                                                                        | 13/   | 0.15 | 0.09 |     |   |
| BP | 0038 | angiotensin-activated signaling pathway                                | 1/292 | 233  | 108  | 593 | 1 |
|    | 166  |                                                                        |       | 28   | 168  | 443 |   |
|    | GO:  |                                                                        | 13/   | 0.15 | 0.09 |     |   |
| BP | 0042 | cellular biogenic amine catabolic process                              | 1/292 | 233  | 108  | 593 | 1 |
|    | 402  |                                                                        |       | 28   | 168  | 443 |   |
|    | GO:  |                                                                        | 13/   | 0.15 | 0.09 |     |   |
| BP | 0042 | hemoglobin biosynthetic process                                        | 1/292 | 233  | 108  | 593 | 1 |
|    | 541  |                                                                        |       | 28   | 168  | 443 |   |
|    | GO:  |                                                                        | 13/   | 0.15 | 0.09 |     |   |
| BP | 0042 | muscle cell fate commitment                                            | 1/292 | 233  | 108  | 593 | 1 |
|    | 693  |                                                                        |       | 28   | 168  | 443 |   |
|    | GO:  |                                                                        | 13/   | 0.15 | 0.09 |     |   |
| BP | 0042 | cytoplasmic sequestering of transcription factor                       | 1/292 | 233  | 108  | 593 | 1 |
|    | 994  |                                                                        |       | 28   | 168  | 443 |   |
|    | GO:  |                                                                        | 13/   | 0.15 | 0.09 |     |   |
| BP | 0044 | positive regulation of vacuole organization                            | 1/292 | 233  | 108  | 593 | 1 |
|    | 090  |                                                                        |       | 28   | 168  | 443 |   |
|    | GO:  |                                                                        | 13/   | 0.15 | 0.09 |     |   |
| BP | 0046 | negative regulation of activated T cell proliferation                  | 1/292 | 233  | 108  | 593 | 1 |
|    | 007  |                                                                        |       | 28   | 168  | 443 |   |
|    | GO:  |                                                                        | 13/   | 0.15 | 0.09 |     |   |
| BP | 0048 | paraxial mesoderm morphogenesis                                        | 1/292 | 233  | 108  | 593 | 1 |
|    | 340  |                                                                        |       | 28   | 168  | 443 |   |
|    | GO:  |                                                                        | 13/   | 0.15 | 0.09 |     |   |
| BP | 0048 | regulation of pinocytosis                                              | 1/292 | 233  | 108  | 593 | 1 |
|    | 548  |                                                                        |       | 28   | 168  | 443 |   |
|    | GO:  |                                                                        | 13/   | 0.15 | 0.09 |     |   |
| BP | 0055 | phospholipid homeostasis                                               | 1/292 | 233  | 108  | 593 | 1 |
|    | 091  |                                                                        |       | 28   | 168  | 443 |   |
|    | GO:  |                                                                        | 13/   | 0.15 | 0.09 |     |   |
| BP | 0060 | negative regulation of pathway-restricted SMAD protein phosphorylation | 1/292 | 233  | 108  | 593 | 1 |
|    | 394  |                                                                        |       | 28   | 168  | 443 |   |
|    | GO:  |                                                                        | 13/   | 0.15 | 0.09 |     |   |
| BP | 0061 | lung secretory cell differentiation                                    | 1/292 | 233  | 108  | 593 | 1 |
|    | 140  |                                                                        |       | 28   | 168  | 443 |   |

|    |      |                                                                                 |       |     |      |      |   |
|----|------|---------------------------------------------------------------------------------|-------|-----|------|------|---|
|    | GO:  |                                                                                 |       | 13/ | 0.15 | 0.09 |   |
| BP | 0071 | positive regulation of phospholipid biosynthetic process                        | 1/292 | 233 | 108  | 593  | 1 |
|    | 073  |                                                                                 |       | 28  | 168  | 443  |   |
|    | GO:  |                                                                                 |       | 13/ | 0.15 | 0.09 |   |
| BP | 0071 | cellular response to iron ion                                                   | 1/292 | 233 | 108  | 593  | 1 |
|    | 281  |                                                                                 |       | 28  | 168  | 443  |   |
|    | GO:  |                                                                                 |       | 13/ | 0.15 | 0.09 |   |
| BP | 0071 | cellular response to vitamin                                                    | 1/292 | 233 | 108  | 593  | 1 |
|    | 295  |                                                                                 |       | 28  | 168  | 443  |   |
|    | GO:  |                                                                                 |       | 13/ | 0.15 | 0.09 |   |
| BP | 0071 | cellular response to prostaglandin E stimulus                                   | 1/292 | 233 | 108  | 593  | 1 |
|    | 380  |                                                                                 |       | 28  | 168  | 443  |   |
|    | GO:  |                                                                                 |       | 13/ | 0.15 | 0.09 |   |
| BP | 0071 | cell proliferation in bone marrow                                               | 1/292 | 233 | 108  | 593  | 1 |
|    | 838  |                                                                                 |       | 28  | 168  | 443  |   |
|    | GO:  |                                                                                 |       | 13/ | 0.15 | 0.09 |   |
| BP | 0072 | nephron tubule epithelial cell differentiation                                  | 1/292 | 233 | 108  | 593  | 1 |
|    | 160  |                                                                                 |       | 28  | 168  | 443  |   |
|    | GO:  |                                                                                 |       | 13/ | 0.15 | 0.09 |   |
| BP | 0090 | positive regulation of glomerulus development                                   | 1/292 | 233 | 108  | 593  | 1 |
|    | 193  |                                                                                 |       | 28  | 168  | 443  |   |
|    | GO:  |                                                                                 |       | 13/ | 0.15 | 0.09 |   |
| BP | 0097 | motor neuron apoptotic process                                                  | 1/292 | 233 | 108  | 593  | 1 |
|    | 049  |                                                                                 |       | 28  | 168  | 443  |   |
|    | GO:  |                                                                                 |       | 13/ | 0.15 | 0.09 |   |
| BP | 0150 | regulation of neuron projection arborization                                    | 1/292 | 233 | 108  | 593  | 1 |
|    | 011  |                                                                                 |       | 28  | 168  | 443  |   |
|    | GO:  |                                                                                 |       | 13/ | 0.15 | 0.09 |   |
| BP | 1901 | regulation of autophagosome maturation                                          | 1/292 | 233 | 108  | 593  | 1 |
|    | 096  |                                                                                 |       | 28  | 168  | 443  |   |
|    | GO:  |                                                                                 |       | 13/ | 0.15 | 0.09 |   |
| BP | 1901 | regulation of extracellular matrix assembly                                     | 1/292 | 233 | 108  | 593  | 1 |
|    | 201  |                                                                                 |       | 28  | 168  | 443  |   |
|    | GO:  |                                                                                 |       | 13/ | 0.15 | 0.09 |   |
| BP | 1901 | iron coordination entity transport                                              | 1/292 | 233 | 108  | 593  | 1 |
|    | 678  |                                                                                 |       | 28  | 168  | 443  |   |
|    | GO:  |                                                                                 |       | 13/ | 0.15 | 0.09 |   |
| BP | 1903 | regulation of RNA polymerase II regulatory region sequence-specific DNA binding | 1/292 | 233 | 108  | 593  | 1 |
|    | 025  |                                                                                 |       | 28  | 168  | 443  |   |
|    | GO:  |                                                                                 |       | 13/ | 0.15 | 0.09 |   |
| BP | 1903 | negative regulation of cell maturation                                          | 1/292 | 233 | 108  | 593  | 1 |
|    | 430  |                                                                                 |       | 28  | 168  | 443  |   |

|    |                                                      |       |     |      |      |   |
|----|------------------------------------------------------|-------|-----|------|------|---|
|    | GO:                                                  |       | 13/ | 0.15 | 0.09 |   |
| BP | 1903 positive regulation of glial cell migration     | 1/292 | 233 | 108  | 593  | 1 |
|    | 977                                                  |       | 28  | 168  | 443  |   |
|    | GO:                                                  |       | 108 | 0.15 | 0.09 |   |
| BP | 0006 triglyceride metabolic process                  | 3/292 | /23 | 365  | 746  | 3 |
|    | 641                                                  |       | 328 | 412  | 727  |   |
|    | GO:                                                  |       | 108 | 0.15 | 0.09 |   |
| BP | 0009 ribonucleoside diphosphate metabolic process    | 3/292 | /23 | 365  | 746  | 3 |
|    | 185                                                  |       | 328 | 412  | 727  |   |
|    | GO:                                                  |       | 108 | 0.15 | 0.09 |   |
| BP | 0046 nucleotide phosphorylation                      | 3/292 | /23 | 365  | 746  | 3 |
|    | 939                                                  |       | 328 | 412  | 727  |   |
|    | GO:                                                  |       | 288 | 0.15 | 0.09 |   |
| BP | 0006 DNA recombination                               | 6/292 | /23 | 413  | 773  | 6 |
|    | 310                                                  |       | 328 | 421  | 821  |   |
|    | GO:                                                  |       | 56/ | 0.15 | 0.09 |   |
| BP | 0001 regulation of T cell mediated cytotoxicity      | 2/292 | 233 | 534  | 826  | 2 |
|    | 914                                                  |       | 28  | 435  | 918  |   |
|    | GO:                                                  |       | 56/ | 0.15 | 0.09 |   |
| BP | 0001 positive regulation of cell-matrix adhesion     | 2/292 | 233 | 534  | 826  | 2 |
|    | 954                                                  |       | 28  | 435  | 918  |   |
|    | GO:                                                  |       | 56/ | 0.15 | 0.09 |   |
| BP | 0006 aminoglycan biosynthetic process                | 2/292 | 233 | 534  | 826  | 2 |
|    | 023                                                  |       | 28  | 435  | 918  |   |
|    | GO:                                                  |       | 56/ | 0.15 | 0.09 |   |
| BP | 0021 cerebellum morphogenesis                        | 2/292 | 233 | 534  | 826  | 2 |
|    | 587                                                  |       | 28  | 435  | 918  |   |
|    | GO:                                                  |       | 56/ | 0.15 | 0.09 |   |
| BP | 0043 inositol phosphate metabolic process            | 2/292 | 233 | 534  | 826  | 2 |
|    | 647                                                  |       | 28  | 435  | 918  |   |
|    | GO:                                                  |       | 56/ | 0.15 | 0.09 |   |
| BP | 0070 necrotic cell death                             | 2/292 | 233 | 534  | 826  | 2 |
|    | 265                                                  |       | 28  | 435  | 918  |   |
|    | GO:                                                  |       | 56/ | 0.15 | 0.09 |   |
| BP | 0098 modulation of excitatory postsynaptic potential | 2/292 | 233 | 534  | 826  | 2 |
|    | 815                                                  |       | 28  | 435  | 918  |   |
|    | GO:                                                  |       | 289 | 0.15 | 0.09 |   |
| BP | 0050 regulation of synapse structure or activity     | 6/292 | /23 | 587  | 856  | 6 |
|    | 803                                                  |       | 328 | 067  | 834  |   |
|    | GO:                                                  |       | 109 | 0.15 | 0.09 |   |
| BP | 0021 cerebellum development                          | 3/292 | /23 | 663  | 898  | 3 |
|    | 549                                                  |       | 328 | 692  | 505  |   |

|    |      |                                                                         |       |     |      |      |   |
|----|------|-------------------------------------------------------------------------|-------|-----|------|------|---|
|    | GO:  |                                                                         |       | 109 | 0.15 | 0.09 |   |
| BP | 1905 | positive regulation of protein localization to membrane                 | 3/292 | /23 | 663  | 898  | 3 |
|    | 477  |                                                                         |       | 328 | 692  | 505  |   |
|    | GO:  |                                                                         |       | 227 | 0.15 | 0.09 |   |
| BP | 0032 | regulation of protein polymerization                                    | 5/292 | /23 | 675  | 899  | 5 |
|    | 271  |                                                                         |       | 328 | 417  | 134  |   |
|    | GO:  |                                                                         |       | 227 | 0.15 | 0.09 |   |
| BP | 0033 | negative regulation of kinase activity                                  | 5/292 | /23 | 675  | 899  | 5 |
|    | 673  |                                                                         |       | 328 | 417  | 134  |   |
|    | GO:  |                                                                         |       | 110 | 0.15 | 0.10 |   |
| BP | 0006 | regulation of DNA replication                                           | 3/292 | /23 | 963  | 043  | 3 |
|    | 275  |                                                                         |       | 328 | 766  | 898  |   |
|    | GO:  |                                                                         |       | 110 | 0.15 | 0.10 |   |
| BP | 0009 | response to xenobiotic stimulus                                         | 3/292 | /23 | 963  | 043  | 3 |
|    | 410  |                                                                         |       | 328 | 766  | 898  |   |
|    | GO:  |                                                                         |       | 57/ | 0.15 | 0.10 |   |
| BP | 0006 | catecholamine metabolic process                                         | 2/292 | 233 | 973  | 043  | 2 |
|    | 584  |                                                                         |       | 28  | 524  | 898  |   |
|    | GO:  |                                                                         |       | 57/ | 0.15 | 0.10 |   |
| BP | 0009 | catechol-containing compound metabolic process                          | 2/292 | 233 | 973  | 043  | 2 |
|    | 712  |                                                                         |       | 28  | 524  | 898  |   |
|    | GO:  |                                                                         |       | 57/ | 0.15 | 0.10 |   |
| BP | 0009 | oocyte differentiation                                                  | 2/292 | 233 | 973  | 043  | 2 |
|    | 994  |                                                                         |       | 28  | 524  | 898  |   |
|    | GO:  |                                                                         |       | 57/ | 0.15 | 0.10 |   |
| BP | 0043 | RNA stabilization                                                       | 2/292 | 233 | 973  | 043  | 2 |
|    | 489  |                                                                         |       | 28  | 524  | 898  |   |
|    | GO:  |                                                                         |       | 57/ | 0.15 | 0.10 |   |
| BP | 1902 | negative regulation of mRNA catabolic process                           | 2/292 | 233 | 973  | 043  | 2 |
|    | 373  |                                                                         |       | 28  | 524  | 898  |   |
|    | GO:  |                                                                         |       | 57/ | 0.15 | 0.10 |   |
| BP | 2000 | positive regulation of stem cell proliferation                          | 2/292 | 233 | 973  | 043  | 2 |
|    | 648  |                                                                         |       | 28  | 524  | 898  |   |
|    | GO:  |                                                                         |       | 14/ | 0.16 | 0.10 |   |
| BP | 0002 | dendritic cell cytokine production                                      | 1/292 | 233 | 171  | 043  | 1 |
|    | 371  |                                                                         |       | 28  | 364  | 898  |   |
|    | GO:  |                                                                         |       | 14/ | 0.16 | 0.10 |   |
| BP | 0002 | negative regulation of type 2 immune response                           | 1/292 | 233 | 171  | 043  | 1 |
|    | 829  |                                                                         |       | 28  | 364  | 898  |   |
|    | GO:  |                                                                         |       | 14/ | 0.16 | 0.10 |   |
| BP | 0003 | chondrocyte differentiation involved in endochondral bone morphogenesis | 1/292 | 233 | 171  | 043  | 1 |
|    | 413  |                                                                         |       | 28  | 364  | 898  |   |

|    |                                                                                       |       |     |      |      |   |
|----|---------------------------------------------------------------------------------------|-------|-----|------|------|---|
|    | GO:                                                                                   |       | 14/ | 0.16 | 0.10 |   |
| BP | 0007 tripartite regional subdivision                                                  | 1/292 | 233 | 171  | 043  | 1 |
|    | 351                                                                                   |       | 28  | 364  | 898  |   |
|    | GO:                                                                                   |       | 14/ | 0.16 | 0.10 |   |
| BP | 0008 anterior/posterior axis specification, embryo                                    | 1/292 | 233 | 171  | 043  | 1 |
|    | 595                                                                                   |       | 28  | 364  | 898  |   |
|    | GO:                                                                                   |       | 14/ | 0.16 | 0.10 |   |
| BP | 0009 amine catabolic process                                                          | 1/292 | 233 | 171  | 043  | 1 |
|    | 310                                                                                   |       | 28  | 364  | 898  |   |
|    | GO:                                                                                   |       | 14/ | 0.16 | 0.10 |   |
| BP | 0010 response to UV-C                                                                 | 1/292 | 233 | 171  | 043  | 1 |
|    | 225                                                                                   |       | 28  | 364  | 898  |   |
|    | GO:                                                                                   |       | 14/ | 0.16 | 0.10 |   |
| BP | 0010 hydrogen peroxide-mediated programmed cell death                                 | 1/292 | 233 | 171  | 043  | 1 |
|    | 421                                                                                   |       | 28  | 364  | 898  |   |
|    | GO:                                                                                   |       | 14/ | 0.16 | 0.10 |   |
| BP | 0010 negative regulation of platelet-derived growth factor receptor signaling pathway | 1/292 | 233 | 171  | 043  | 1 |
|    | 642                                                                                   |       | 28  | 364  | 898  |   |
|    | GO:                                                                                   |       | 14/ | 0.16 | 0.10 |   |
| BP | 0010 negative regulation of tumor necrosis factor-mediated signaling pathway          | 1/292 | 233 | 171  | 043  | 1 |
|    | 804                                                                                   |       | 28  | 364  | 898  |   |
|    | GO:                                                                                   |       | 14/ | 0.16 | 0.10 |   |
| BP | 0021 regulation of cerebellar granule cell precursor proliferation                    | 1/292 | 233 | 171  | 043  | 1 |
|    | 936                                                                                   |       | 28  | 364  | 898  |   |
|    | GO:                                                                                   |       | 14/ | 0.16 | 0.10 |   |
| BP | 0031 positive regulation of synaptic plasticity                                       | 1/292 | 233 | 171  | 043  | 1 |
|    | 915                                                                                   |       | 28  | 364  | 898  |   |
|    | GO:                                                                                   |       | 14/ | 0.16 | 0.10 |   |
| BP | 0032 negative regulation of appetite                                                  | 1/292 | 233 | 171  | 043  | 1 |
|    | 099                                                                                   |       | 28  | 364  | 898  |   |
|    | GO:                                                                                   |       | 14/ | 0.16 | 0.10 |   |
| BP | 0032 positive regulation of interleukin-13 production                                 | 1/292 | 233 | 171  | 043  | 1 |
|    | 736                                                                                   |       | 28  | 364  | 898  |   |
|    | GO:                                                                                   |       | 14/ | 0.16 | 0.10 |   |
| BP | 0033 immature T cell proliferation                                                    | 1/292 | 233 | 171  | 043  | 1 |
|    | 079                                                                                   |       | 28  | 364  | 898  |   |
|    | GO:                                                                                   |       | 14/ | 0.16 | 0.10 |   |
| BP | 0035 regulation of peroxisome proliferator activated receptor signaling pathway       | 1/292 | 233 | 171  | 043  | 1 |
|    | 358                                                                                   |       | 28  | 364  | 898  |   |
|    | GO:                                                                                   |       | 14/ | 0.16 | 0.10 |   |
| BP | 0036 IRE1-mediated unfolded protein response                                          | 1/292 | 233 | 171  | 043  | 1 |
|    | 498                                                                                   |       | 28  | 364  | 898  |   |

|    |      |                                                                                 |       |     |      |      |   |
|----|------|---------------------------------------------------------------------------------|-------|-----|------|------|---|
|    | GO:  |                                                                                 |       | 14/ | 0.16 | 0.10 |   |
| BP | 0045 | regulation of circadian sleep/wake cycle,<br>non-REM sleep                      | 1/292 | 233 | 171  | 043  | 1 |
|    | 188  |                                                                                 |       | 28  | 364  | 898  |   |
|    | GO:  |                                                                                 |       | 14/ | 0.16 | 0.10 |   |
| BP | 0045 | regulation of RNA polymerase II transcription<br>preinitiation complex assembly | 1/292 | 233 | 171  | 043  | 1 |
|    | 898  |                                                                                 |       | 28  | 364  | 898  |   |
|    | GO:  |                                                                                 |       | 14/ | 0.16 | 0.10 |   |
| BP | 0046 | carbohydrate phosphorylation                                                    | 1/292 | 233 | 171  | 043  | 1 |
|    | 835  |                                                                                 |       | 28  | 364  | 898  |   |
|    | GO:  |                                                                                 |       | 14/ | 0.16 | 0.10 |   |
| BP | 0048 | somatic stem cell division                                                      | 1/292 | 233 | 171  | 043  | 1 |
|    | 103  |                                                                                 |       | 28  | 364  | 898  |   |
|    | GO:  |                                                                                 |       | 14/ | 0.16 | 0.10 |   |
| BP | 0048 | regulation of timing of cell differentiation                                    | 1/292 | 233 | 171  | 043  | 1 |
|    | 505  |                                                                                 |       | 28  | 364  | 898  |   |
|    | GO:  |                                                                                 |       | 14/ | 0.16 | 0.10 |   |
| BP | 0048 | branching morphogenesis of a nerve                                              | 1/292 | 233 | 171  | 043  | 1 |
|    | 755  |                                                                                 |       | 28  | 364  | 898  |   |
|    | GO:  |                                                                                 |       | 14/ | 0.16 | 0.10 |   |
| BP | 0060 | radial glial cell differentiation                                               | 1/292 | 233 | 171  | 043  | 1 |
|    | 019  |                                                                                 |       | 28  | 364  | 898  |   |
|    | GO:  |                                                                                 |       | 14/ | 0.16 | 0.10 |   |
| BP | 0060 | female mating behavior                                                          | 1/292 | 233 | 171  | 043  | 1 |
|    | 180  |                                                                                 |       | 28  | 364  | 898  |   |
|    | GO:  |                                                                                 |       | 14/ | 0.16 | 0.10 |   |
| BP | 0060 | regulation of respiratory burst                                                 | 1/292 | 233 | 171  | 043  | 1 |
|    | 263  |                                                                                 |       | 28  | 364  | 898  |   |
|    | GO:  |                                                                                 |       | 14/ | 0.16 | 0.10 |   |
| BP | 0061 | cardiac neural crest cell development<br>involved in heart development          | 1/292 | 233 | 171  | 043  | 1 |
|    | 308  |                                                                                 |       | 28  | 364  | 898  |   |
|    | GO:  |                                                                                 |       | 14/ | 0.16 | 0.10 |   |
| BP | 0070 | protein homotrimerization                                                       | 1/292 | 233 | 171  | 043  | 1 |
|    | 207  |                                                                                 |       | 28  | 364  | 898  |   |
|    | GO:  |                                                                                 |       | 14/ | 0.16 | 0.10 |   |
| BP | 0070 | hepatocyte differentiation                                                      | 1/292 | 233 | 171  | 043  | 1 |
|    | 365  |                                                                                 |       | 28  | 364  | 898  |   |
|    | GO:  |                                                                                 |       | 14/ | 0.16 | 0.10 |   |
| BP | 0071 | cellular response to gonadotropin stimulus                                      | 1/292 | 233 | 171  | 043  | 1 |
|    | 371  |                                                                                 |       | 28  | 364  | 898  |   |
|    | GO:  |                                                                                 |       | 14/ | 0.16 | 0.10 |   |
| BP | 0071 | positive regulation of podosome assembly                                        | 1/292 | 233 | 171  | 043  | 1 |
|    | 803  |                                                                                 |       | 28  | 364  | 898  |   |



|    |      |                                                              |       |      |      |     |   |
|----|------|--------------------------------------------------------------|-------|------|------|-----|---|
|    | GO:  |                                                              | 14/   | 0.16 | 0.10 |     |   |
| BP | 0072 | metanephric glomerulus development                           | 1/292 | 233  | 171  | 043 | 1 |
|    | 224  |                                                              |       | 28   | 364  | 898 |   |
|    | GO:  |                                                              | 14/   | 0.16 | 0.10 |     |   |
| BP | 0090 | regulation of sphingolipid biosynthetic process              | 1/292 | 233  | 171  | 043 | 1 |
|    | 153  |                                                              |       | 28   | 364  | 898 |   |
|    | GO:  |                                                              | 14/   | 0.16 | 0.10 |     |   |
| BP | 0090 | planar cell polarity pathway involved in neural tube closure | 1/292 | 233  | 171  | 043 | 1 |
|    | 179  |                                                              |       | 28   | 364  | 898 |   |
|    | GO:  |                                                              | 14/   | 0.16 | 0.10 |     |   |
| BP | 0090 | negative regulation of platelet aggregation                  | 1/292 | 233  | 171  | 043 | 1 |
|    | 331  |                                                              |       | 28   | 364  | 898 |   |
|    | GO:  |                                                              | 14/   | 0.16 | 0.10 |     |   |
| BP | 0097 | programmed cell death in response to reactive oxygen species | 1/292 | 233  | 171  | 043 | 1 |
|    | 468  |                                                              |       | 28   | 364  | 898 |   |
|    | GO:  |                                                              | 14/   | 0.16 | 0.10 |     |   |
| BP | 1902 | regulation of neutrophil activation                          | 1/292 | 233  | 171  | 043 | 1 |
|    | 563  |                                                              |       | 28   | 364  | 898 |   |
|    | GO:  |                                                              | 14/   | 0.16 | 0.10 |     |   |
| BP | 1903 | regulation of DNA catabolic process                          | 1/292 | 233  | 171  | 043 | 1 |
|    | 624  |                                                              |       | 28   | 364  | 898 |   |
|    | GO:  |                                                              | 14/   | 0.16 | 0.10 |     |   |
| BP | 1904 | midbrain dopaminergic neuron differentiation                 | 1/292 | 233  | 171  | 043 | 1 |
|    | 948  |                                                              |       | 28   | 364  | 898 |   |
|    | GO:  |                                                              | 14/   | 0.16 | 0.10 |     |   |
| BP | 1905 | regulation of membrane lipid metabolic process               | 1/292 | 233  | 171  | 043 | 1 |
|    | 038  |                                                              |       | 28   | 364  | 898 |   |
|    | GO:  |                                                              | 14/   | 0.16 | 0.10 |     |   |
| BP | 2000 | positive regulation of non-canonical Wnt signaling pathway   | 1/292 | 233  | 171  | 043 | 1 |
|    | 052  |                                                              |       | 28   | 364  | 898 |   |
|    | GO:  |                                                              | 169   | 0.16 | 0.10 |     |   |
| BP | 0031 | gene silencing by RNA                                        | 4/292 | /23  | 258  | 091 | 4 |
|    | 047  |                                                              |       | 328  | 772  | 393 |   |
|    | GO:  |                                                              | 169   | 0.16 | 0.10 |     |   |
| BP | 0035 | regulation of dephosphorylation                              | 4/292 | /23  | 258  | 091 | 4 |
|    | 303  |                                                              |       | 328  | 772  | 393 |   |
|    | GO:  |                                                              | 111   | 0.16 | 0.10 |     |   |
| BP | 0008 | apoptotic mitochondrial changes                              | 3/292 | /23  | 265  | 092 | 3 |
|    | 637  |                                                              |       | 328  | 593  | 232 |   |
|    | GO:  |                                                              | 58/   | 0.16 | 0.10 |     |   |
| BP | 0010 | regulation of striated muscle cell apoptotic process         | 2/292 | 233  | 414  | 167 | 2 |
|    | 662  |                                                              |       | 28   | 884  | 768 |   |

|    |                                                    |       |     |      |      |   |
|----|----------------------------------------------------|-------|-----|------|------|---|
|    | GO:                                                |       | 58/ | 0.16 | 0.10 |   |
| BP | 0035 regulation of histone acetylation             | 2/292 | 233 | 414  | 167  | 2 |
|    | 065                                                |       | 28  | 884  | 768  |   |
|    | GO:                                                |       | 58/ | 0.16 | 0.10 |   |
| BP | 0035 hair cell differentiation                     | 2/292 | 233 | 414  | 167  | 2 |
|    | 315                                                |       | 28  | 884  | 768  |   |
|    | GO:                                                |       | 58/ | 0.16 | 0.10 |   |
| BP | 0043 regulation of carbohydrate catabolic process  | 2/292 | 233 | 414  | 167  | 2 |
|    | 470                                                |       | 28  | 884  | 768  |   |
|    | GO:                                                |       | 58/ | 0.16 | 0.10 |   |
| BP | 0051 intraspecies interaction between organisms    | 2/292 | 233 | 414  | 167  | 2 |
|    | 703                                                |       | 28  | 884  | 768  |   |
|    | GO:                                                |       | 294 | 0.16 | 0.10 |   |
| BP | 0051 protein maturation                            | 6/292 | /23 | 468  | 197  | 6 |
|    | 604                                                |       | 328 | 119  | 32   |   |
|    | GO:                                                |       | 112 | 0.16 | 0.10 |   |
| BP | 0007 plasma membrane organization                  | 3/292 | /23 | 569  | 256  | 3 |
|    | 009                                                |       | 328 | 132  | 427  |   |
|    | GO:                                                |       | 295 | 0.16 | 0.10 |   |
| BP | 0072 protein localization to plasma membrane       | 6/292 | /23 | 646  | 301  | 6 |
|    | 659                                                |       | 328 | 848  | 078  |   |
|    | GO:                                                |       | 171 | 0.16 | 0.10 |   |
| BP | 0019 stem cell population maintenance              | 4/292 | /23 | 739  | 355  | 4 |
|    | 827                                                |       | 328 | 812  | 132  |   |
|    | GO:                                                |       | 59/ | 0.16 | 0.10 |   |
| BP | 0007 establishment of tissue polarity              | 2/292 | 233 | 858  | 418  | 2 |
|    | 164                                                |       | 28  | 391  | 007  |   |
|    | GO:                                                |       | 59/ | 0.16 | 0.10 |   |
| BP | 0007 neuromuscular junction development            | 2/292 | 233 | 858  | 418  | 2 |
|    | 528                                                |       | 28  | 391  | 007  |   |
|    | GO:                                                |       | 59/ | 0.16 | 0.10 |   |
| BP | 0010 cardiac muscle cell apoptotic process         | 2/292 | 233 | 858  | 418  | 2 |
|    | 659                                                |       | 28  | 391  | 007  |   |
|    | GO:                                                |       | 234 | 0.17 | 0.10 |   |
| BP | 0060 regulation of canonical Wnt signaling pathway | 5/292 | /23 | 094  | 439  | 5 |
|    | 828                                                |       | 328 | 187  | 491  |   |
|    | GO:                                                |       | 114 | 0.17 | 0.10 |   |
| BP | 0005 polysaccharide metabolic process              | 3/292 | /23 | 181  | 439  | 3 |
|    | 976                                                |       | 328 | 184  | 491  |   |
|    | GO:                                                |       | 114 | 0.17 | 0.10 |   |
| BP | 0043 steroid hormone mediated signaling pathway    | 3/292 | /23 | 181  | 439  | 3 |
|    | 401                                                |       | 328 | 184  | 491  |   |

|    |      |                                                          |       |     |      |      |   |
|----|------|----------------------------------------------------------|-------|-----|------|------|---|
|    | GO:  |                                                          |       | 114 | 0.17 | 0.10 |   |
| BP | 0060 | regulation of postsynaptic membrane potential            | 3/292 | /23 | 181  | 439  | 3 |
|    | 078  |                                                          |       | 328 | 184  | 491  |   |
|    | GO:  |                                                          |       | 114 | 0.17 | 0.10 |   |
| BP | 1903 | regulation of protein localization to plasma membrane    | 3/292 | /23 | 181  | 439  | 3 |
|    | 076  |                                                          |       | 328 | 184  | 491  |   |
|    | GO:  |                                                          |       | 15/ | 0.17 | 0.10 |   |
| BP | 0001 | immunological synapse formation                          | 1/292 | 233 | 221  | 439  | 1 |
|    | 771  |                                                          |       | 28  | 289  | 491  |   |
|    | GO:  |                                                          |       | 15/ | 0.17 | 0.10 |   |
| BP | 0006 | pyrimidine nucleobase metabolic process                  | 1/292 | 233 | 221  | 439  | 1 |
|    | 206  |                                                          |       | 28  | 289  | 491  |   |
|    | GO:  |                                                          |       | 15/ | 0.17 | 0.10 |   |
| BP | 0007 | negative regulation of adenylate cyclase activity        | 1/292 | 233 | 221  | 439  | 1 |
|    | 194  |                                                          |       | 28  | 289  | 491  |   |
|    | GO:  |                                                          |       | 15/ | 0.17 | 0.10 |   |
| BP | 0010 | negative regulation of glycoprotein biosynthetic process | 1/292 | 233 | 221  | 439  | 1 |
|    | 561  |                                                          |       | 28  | 289  | 491  |   |
|    | GO:  |                                                          |       | 15/ | 0.17 | 0.10 |   |
| BP | 0010 | regulation of cholesterol storage                        | 1/292 | 233 | 221  | 439  | 1 |
|    | 885  |                                                          |       | 28  | 289  | 491  |   |
|    | GO:  |                                                          |       | 15/ | 0.17 | 0.10 |   |
| BP | 0014 | urinary tract smooth muscle contraction                  | 1/292 | 233 | 221  | 439  | 1 |
|    | 848  |                                                          |       | 28  | 289  | 491  |   |
|    | GO:  |                                                          |       | 15/ | 0.17 | 0.10 |   |
| BP | 0014 | regulation of skeletal muscle cell proliferation         | 1/292 | 233 | 221  | 439  | 1 |
|    | 857  |                                                          |       | 28  | 289  | 491  |   |
|    | GO:  |                                                          |       | 15/ | 0.17 | 0.10 |   |
| BP | 0030 | intestinal cholesterol absorption                        | 1/292 | 233 | 221  | 439  | 1 |
|    | 299  |                                                          |       | 28  | 289  | 491  |   |
|    | GO:  |                                                          |       | 15/ | 0.17 | 0.10 |   |
| BP | 0030 | regulation of complement activation                      | 1/292 | 233 | 221  | 439  | 1 |
|    | 449  |                                                          |       | 28  | 289  | 491  |   |
|    | GO:  |                                                          |       | 15/ | 0.17 | 0.10 |   |
| BP | 0032 | negative regulation of response to food                  | 1/292 | 233 | 221  | 439  | 1 |
|    | 096  |                                                          |       | 28  | 289  | 491  |   |
|    | GO:  |                                                          |       | 15/ | 0.17 | 0.10 |   |
| BP | 0032 | regulation of microvillus organization                   | 1/292 | 233 | 221  | 439  | 1 |
|    | 530  |                                                          |       | 28  | 289  | 491  |   |
|    | GO:  |                                                          |       | 15/ | 0.17 | 0.10 |   |
| BP | 0032 | negative regulation of interleukin-8 production          | 1/292 | 233 | 221  | 439  | 1 |
|    | 717  |                                                          |       | 28  | 289  | 491  |   |

|    |                                                               |       |     |      |      |   |
|----|---------------------------------------------------------------|-------|-----|------|------|---|
|    | GO:                                                           |       | 15/ | 0.17 | 0.10 |   |
| BP | 0033 positive regulation of osteoblast proliferation          | 1/292 | 233 | 221  | 439  | 1 |
|    | 690                                                           |       | 28  | 289  | 491  |   |
|    | GO:                                                           |       | 15/ | 0.17 | 0.10 |   |
| BP | 0034 toll-like receptor 9 signaling pathway                   | 1/292 | 233 | 221  | 439  | 1 |
|    | 162                                                           |       | 28  | 289  | 491  |   |
|    | GO:                                                           |       | 15/ | 0.17 | 0.10 |   |
| BP | 0034 steroid esterification                                   | 1/292 | 233 | 221  | 439  | 1 |
|    | 433                                                           |       | 28  | 289  | 491  |   |
|    | GO:                                                           |       | 15/ | 0.17 | 0.10 |   |
| BP | 0034 sterol esterification                                    | 1/292 | 233 | 221  | 439  | 1 |
|    | 434                                                           |       | 28  | 289  | 491  |   |
|    | GO:                                                           |       | 15/ | 0.17 | 0.10 |   |
| BP | 0034 cholesterol esterification                               | 1/292 | 233 | 221  | 439  | 1 |
|    | 435                                                           |       | 28  | 289  | 491  |   |
|    | GO:                                                           |       | 15/ | 0.17 | 0.10 |   |
| BP | 0034 response to gonadotropin                                 | 1/292 | 233 | 221  | 439  | 1 |
|    | 698                                                           |       | 28  | 289  | 491  |   |
|    | GO:                                                           |       | 15/ | 0.17 | 0.10 |   |
| BP | 0042 circadian sleep/wake cycle, non-REM sleep                | 1/292 | 233 | 221  | 439  | 1 |
|    | 748                                                           |       | 28  | 289  | 491  |   |
|    | GO:                                                           |       | 15/ | 0.17 | 0.10 |   |
| BP | 0043 surfactant homeostasis                                   | 1/292 | 233 | 221  | 439  | 1 |
|    | 129                                                           |       | 28  | 289  | 491  |   |
|    | GO:                                                           |       | 15/ | 0.17 | 0.10 |   |
| BP | 0044 negative regulation by host of viral process             | 1/292 | 233 | 221  | 439  | 1 |
|    | 793                                                           |       | 28  | 289  | 491  |   |
|    | GO:                                                           |       | 15/ | 0.17 | 0.10 |   |
| BP | 0045 positive regulation of regulatory T cell differentiation | 1/292 | 233 | 221  | 439  | 1 |
|    | 591                                                           |       | 28  | 289  | 491  |   |
|    | GO:                                                           |       | 15/ | 0.17 | 0.10 |   |
| BP | 0045 negative regulation of epidermal cell differentiation    | 1/292 | 233 | 221  | 439  | 1 |
|    | 605                                                           |       | 28  | 289  | 491  |   |
|    | GO:                                                           |       | 15/ | 0.17 | 0.10 |   |
| BP | 0045 positive regulation of keratinocyte differentiation      | 1/292 | 233 | 221  | 439  | 1 |
|    | 618                                                           |       | 28  | 289  | 491  |   |
|    | GO:                                                           |       | 15/ | 0.17 | 0.10 |   |
| BP | 0047 regulation of response to osmotic stress                 | 1/292 | 233 | 221  | 439  | 1 |
|    | 484                                                           |       | 28  | 289  | 491  |   |
|    | GO:                                                           |       | 15/ | 0.17 | 0.10 |   |
| BP | 0048 regulation of developmental pigmentation                 | 1/292 | 233 | 221  | 439  | 1 |
|    | 070                                                           |       | 28  | 289  | 491  |   |

|    |      |                                                                                |       |     |      |      |   |
|----|------|--------------------------------------------------------------------------------|-------|-----|------|------|---|
|    | GO:  |                                                                                |       | 15/ | 0.17 | 0.10 |   |
| BP | 0048 | chromatin-mediated maintenance of transcription                                | 1/292 | 233 | 221  | 439  | 1 |
|    | 096  |                                                                                |       | 28  | 289  | 491  |   |
|    | GO:  |                                                                                |       | 15/ | 0.17 | 0.10 |   |
| BP | 0050 | regulation of lipoprotein metabolic process                                    | 1/292 | 233 | 221  | 439  | 1 |
|    | 746  |                                                                                |       | 28  | 289  | 491  |   |
|    | GO:  |                                                                                |       | 15/ | 0.17 | 0.10 |   |
| BP | 0060 | regulation of protein glycosylation                                            | 1/292 | 233 | 221  | 439  | 1 |
|    | 049  |                                                                                |       | 28  | 289  | 491  |   |
|    | GO:  |                                                                                |       | 15/ | 0.17 | 0.10 |   |
| BP | 0060 | regulation of response to interferon-gamma                                     | 1/292 | 233 | 221  | 439  | 1 |
|    | 330  |                                                                                |       | 28  | 289  | 491  |   |
|    | GO:  |                                                                                |       | 15/ | 0.17 | 0.10 |   |
| BP | 0060 | regulation of interferon-gamma-mediated signaling pathway                      | 1/292 | 233 | 221  | 439  | 1 |
|    | 334  |                                                                                |       | 28  | 289  | 491  |   |
|    | GO:  |                                                                                |       | 15/ | 0.17 | 0.10 |   |
| BP | 0060 | growth hormone receptor signaling pathway                                      | 1/292 | 233 | 221  | 439  | 1 |
|    | 396  |                                                                                |       | 28  | 289  | 491  |   |
|    | GO:  |                                                                                |       | 15/ | 0.17 | 0.10 |   |
| BP | 0060 | branching involved in prostate gland morphogenesis                             | 1/292 | 233 | 221  | 439  | 1 |
|    | 442  |                                                                                |       | 28  | 289  | 491  |   |
|    | GO:  |                                                                                |       | 15/ | 0.17 | 0.10 |   |
| BP | 0060 | positive regulation of inositol phosphate biosynthetic process                 | 1/292 | 233 | 221  | 439  | 1 |
|    | 732  |                                                                                |       | 28  | 289  | 491  |   |
|    | GO:  |                                                                                |       | 15/ | 0.17 | 0.10 |   |
| BP | 0060 | epithelial cell differentiation involved in prostate gland development         | 1/292 | 233 | 221  | 439  | 1 |
|    | 742  |                                                                                |       | 28  | 289  | 491  |   |
|    | GO:  |                                                                                |       | 15/ | 0.17 | 0.10 |   |
| BP | 0061 | eyelid development in camera-type eye                                          | 1/292 | 233 | 221  | 439  | 1 |
|    | 029  |                                                                                |       | 28  | 289  | 491  |   |
|    | GO:  |                                                                                |       | 15/ | 0.17 | 0.10 |   |
| BP | 0061 | positive regulation of cell growth involved in cardiac muscle cell development | 1/292 | 233 | 221  | 439  | 1 |
|    | 051  |                                                                                |       | 28  | 289  | 491  |   |
|    | GO:  |                                                                                |       | 15/ | 0.17 | 0.10 |   |
| BP | 0061 | cardiac neural crest cell differentiation involved in heart development        | 1/292 | 233 | 221  | 439  | 1 |
|    | 307  |                                                                                |       | 28  | 289  | 491  |   |
|    | GO:  |                                                                                |       | 15/ | 0.17 | 0.10 |   |
| BP | 0061 | renal filtration cell differentiation                                          | 1/292 | 233 | 221  | 439  | 1 |
|    | 318  |                                                                                |       | 28  | 289  | 491  |   |
|    | GO:  |                                                                                |       | 15/ | 0.17 | 0.10 |   |
| BP | 0070 | lens fiber cell development                                                    | 1/292 | 233 | 221  | 439  | 1 |
|    | 307  |                                                                                |       | 28  | 289  | 491  |   |

|    |      |                                                                                |       |     |      |      |   |
|----|------|--------------------------------------------------------------------------------|-------|-----|------|------|---|
|    | GO:  |                                                                                |       | 15/ | 0.17 | 0.10 |   |
| BP | 0071 | cellular response to growth hormone stimulus                                   | 1/292 | 233 | 221  | 439  | 1 |
|    | 378  |                                                                                |       | 28  | 289  | 491  |   |
|    | GO:  |                                                                                |       | 15/ | 0.17 | 0.10 |   |
| BP | 0072 | glomerular visceral epithelial cell differentiation                            | 1/292 | 233 | 221  | 439  | 1 |
|    | 112  |                                                                                |       | 28  | 289  | 491  |   |
|    | GO:  |                                                                                |       | 15/ | 0.17 | 0.10 |   |
| BP | 0072 | glomerular epithelial cell differentiation                                     | 1/292 | 233 | 221  | 439  | 1 |
|    | 311  |                                                                                |       | 28  | 289  | 491  |   |
|    | GO:  |                                                                                |       | 15/ | 0.17 | 0.10 |   |
| BP | 0072 | tricarboxylic acid metabolic process                                           | 1/292 | 233 | 221  | 439  | 1 |
|    | 350  |                                                                                |       | 28  | 289  | 491  |   |
|    | GO:  |                                                                                |       | 15/ | 0.17 | 0.10 |   |
| BP | 0090 | regulation of establishment of planar polarity involved in neural tube closure | 1/292 | 233 | 221  | 439  | 1 |
|    | 178  |                                                                                |       | 28  | 289  | 491  |   |
|    | GO:  |                                                                                |       | 15/ | 0.17 | 0.10 |   |
| BP | 0097 | GABAergic neuron differentiation                                               | 1/292 | 233 | 221  | 439  | 1 |
|    | 154  |                                                                                |       | 28  | 289  | 491  |   |
|    | GO:  |                                                                                |       | 15/ | 0.17 | 0.10 |   |
| BP | 0098 | L-glutamate import across plasma membrane                                      | 1/292 | 233 | 221  | 439  | 1 |
|    | 712  |                                                                                |       | 28  | 289  | 491  |   |
|    | GO:  |                                                                                |       | 15/ | 0.17 | 0.10 |   |
| BP | 0098 | retrograde trans-synaptic signaling                                            | 1/292 | 233 | 221  | 439  | 1 |
|    | 917  |                                                                                |       | 28  | 289  | 491  |   |
|    | GO:  |                                                                                |       | 15/ | 0.17 | 0.10 |   |
| BP | 0150 | protein localization to cell-cell junction                                     | 1/292 | 233 | 221  | 439  | 1 |
|    | 105  |                                                                                |       | 28  | 289  | 491  |   |
|    | GO:  | regulation of intrinsic apoptotic signaling                                    |       | 15/ | 0.17 | 0.10 |   |
| BP | 1902 | pathway in response to DNA damage by p53 class mediator                        | 1/292 | 233 | 221  | 439  | 1 |
|    | 165  |                                                                                |       | 28  | 289  | 491  |   |
|    | GO:  |                                                                                |       | 15/ | 0.17 | 0.10 |   |
| BP | 1902 | mitotic DNA replication                                                        | 1/292 | 233 | 221  | 439  | 1 |
|    | 969  |                                                                                |       | 28  | 289  | 491  |   |
|    | GO:  |                                                                                |       | 15/ | 0.17 | 0.10 |   |
| BP | 1903 | positive regulation of anion transmembrane transport                           | 1/292 | 233 | 221  | 439  | 1 |
|    | 961  |                                                                                |       | 28  | 289  | 491  |   |
|    | GO:  |                                                                                |       | 15/ | 0.17 | 0.10 |   |
| BP | 1904 | regulation of intestinal absorption                                            | 1/292 | 233 | 221  | 439  | 1 |
|    | 478  |                                                                                |       | 28  | 289  | 491  |   |
|    | GO:  |                                                                                |       | 60/ | 0.17 | 0.10 |   |
| BP | 0007 | lactation                                                                      | 2/292 | 233 | 303  | 468  | 2 |
|    | 595  |                                                                                |       | 28  | 922  | 947  |   |

|    |                                                     |       |     |      |      |   |
|----|-----------------------------------------------------|-------|-----|------|------|---|
|    | GO:                                                 |       | 60/ | 0.17 | 0.10 |   |
| BP | 0021 hindbrain morphogenesis                        | 2/292 | 233 | 303  | 468  | 2 |
|    | 575                                                 |       | 28  | 922  | 947  |   |
|    | GO:                                                 |       | 60/ | 0.17 | 0.10 |   |
| BP | 0045 negative regulation of G protein-coupled       | 2/292 | 233 | 303  | 468  | 2 |
|    | 744 receptor signaling pathway                      |       | 28  | 922  | 947  |   |
|    | GO:                                                 |       | 60/ | 0.17 | 0.10 |   |
| BP | 0051 regulation of focal adhesion assembly          | 2/292 | 233 | 303  | 468  | 2 |
|    | 893                                                 |       | 28  | 922  | 947  |   |
|    | GO:                                                 |       | 60/ | 0.17 | 0.10 |   |
| BP | 0090 regulation of cell-substrate junction          | 2/292 | 233 | 303  | 468  | 2 |
|    | 109 assembly                                        |       | 28  | 922  | 947  |   |
|    | GO:                                                 |       | 60/ | 0.17 | 0.10 |   |
| BP | 1901 regulation of potassium ion transmembrane      | 2/292 | 233 | 303  | 468  | 2 |
|    | 016 transporter activity                            |       | 28  | 922  | 947  |   |
|    | GO:                                                 |       | 115 | 0.17 | 0.10 |   |
| BP | 0030 keratinocyte differentiation                   | 3/292 | /23 | 489  | 574  | 3 |
|    | 216                                                 |       | 328 | 616  | 359  |   |
|    | GO:                                                 |       | 115 | 0.17 | 0.10 |   |
| BP | 0031 positive regulation of protein ubiquitination  | 3/292 | /23 | 489  | 574  | 3 |
|    | 398                                                 |       | 328 | 616  | 359  |   |
|    | GO:                                                 |       | 175 | 0.17 | 0.10 |   |
| BP | 0098 maintenance of cell number                     | 4/292 | /23 | 716  | 708  | 4 |
|    | 727                                                 |       | 328 | 785  | 199  |   |
|    | GO:                                                 |       | 61/ | 0.17 | 0.10 |   |
| BP | 0007 response to nutrient                           | 2/292 | 233 | 751  | 722  | 2 |
|    | 584                                                 |       | 28  | 357  | 07   |   |
|    | GO:                                                 |       | 61/ | 0.17 | 0.10 |   |
| BP | 0051 modulation by host of symbiont process         | 2/292 | 233 | 751  | 722  | 2 |
|    | 851                                                 |       | 28  | 357  | 07   |   |
|    | GO:                                                 |       | 62/ | 0.18 | 0.10 |   |
| BP | 0010 body morphogenesis                             | 2/292 | 233 | 200  | 861  | 2 |
|    | 171                                                 |       | 28  | 58   | 062  |   |
|    | GO:                                                 |       | 62/ | 0.18 | 0.10 |   |
| BP | 0010 striated muscle cell apoptotic process         | 2/292 | 233 | 200  | 861  | 2 |
|    | 658                                                 |       | 28  | 58   | 062  |   |
|    | GO:                                                 |       | 62/ | 0.18 | 0.10 |   |
| BP | 0030 DNA damage response, signal transduction       | 2/292 | 233 | 200  | 861  | 2 |
|    | 330 by p53 class mediator                           |       | 28  | 58   | 062  |   |
|    | GO:                                                 |       | 62/ | 0.18 | 0.10 |   |
| BP | 0032 negative regulation of intracellular transport | 2/292 | 233 | 200  | 861  | 2 |
|    | 387                                                 |       | 28  | 58   | 062  |   |

|    |                                                       |       |     |      |      |   |  |
|----|-------------------------------------------------------|-------|-----|------|------|---|--|
|    | GO:                                                   |       | 62/ | 0.18 | 0.10 |   |  |
| BP | 0048 circadian behavior                               | 2/292 | 233 | 200  | 861  | 2 |  |
|    | 512                                                   |       | 28  | 58   | 062  |   |  |
|    | GO:                                                   |       | 16/ | 0.18 | 0.10 |   |  |
| BP | 0001 renal system process involved in regulation      | 1/292 | 233 | 258  | 861  | 1 |  |
|    | 977 of blood volume                                   |       | 28  | 109  | 062  |   |  |
|    | GO:                                                   |       | 16/ | 0.18 | 0.10 |   |  |
| BP | 0003 cardiac conduction system development            | 1/292 | 233 | 258  | 861  | 1 |  |
|    | 161                                                   |       | 28  | 109  | 062  |   |  |
|    | GO:                                                   |       | 16/ | 0.18 | 0.10 |   |  |
| BP | 0006 posttranslational protein targeting to           | 1/292 | 233 | 258  | 861  | 1 |  |
|    | 620 endoplasmic reticulum membrane                    |       | 28  | 109  | 062  |   |  |
|    | GO:                                                   |       | 16/ | 0.18 | 0.10 |   |  |
| BP | 0006 phosphatidylserine metabolic process             | 1/292 | 233 | 258  | 861  | 1 |  |
|    | 658                                                   |       | 28  | 109  | 062  |   |  |
|    | GO:                                                   |       | 16/ | 0.18 | 0.10 |   |  |
| BP | 0010 response to UV-B                                 | 1/292 | 233 | 258  | 861  | 1 |  |
|    | 224                                                   |       | 28  | 109  | 062  |   |  |
|    | GO:                                                   |       | 16/ | 0.18 | 0.10 |   |  |
| BP | 0014 regulation of skeletal muscle adaptation         | 1/292 | 233 | 258  | 861  | 1 |  |
|    | 733                                                   |       | 28  | 109  | 062  |   |  |
|    | GO:                                                   |       | 16/ | 0.18 | 0.10 |   |  |
| BP | 0014 skeletal muscle cell proliferation               | 1/292 | 233 | 258  | 861  | 1 |  |
|    | 856                                                   |       | 28  | 109  | 062  |   |  |
|    | GO:                                                   |       | 16/ | 0.18 | 0.10 |   |  |
| BP | 0019 antigen processing and presentation of           | 1/292 | 233 | 258  | 861  | 1 |  |
|    | 886 exogenous peptide antigen via MHC class II        |       | 28  | 109  | 062  |   |  |
|    | GO:                                                   |       | 16/ | 0.18 | 0.10 |   |  |
| BP | 0033 positive regulation of T cell differentiation in | 1/292 | 233 | 258  | 861  | 1 |  |
|    | 089 thymus                                            |       | 28  | 109  | 062  |   |  |
|    | GO:                                                   |       | 16/ | 0.18 | 0.10 |   |  |
| BP | 0035 genitalia morphogenesis                          | 1/292 | 233 | 258  | 861  | 1 |  |
|    | 112                                                   |       | 28  | 109  | 062  |   |  |
|    | GO:                                                   |       | 16/ | 0.18 | 0.10 |   |  |
| BP | 0039 regulation of RIG-I signaling pathway            | 1/292 | 233 | 258  | 861  | 1 |  |
|    | 535                                                   |       | 28  | 109  | 062  |   |  |
|    | GO:                                                   |       | 16/ | 0.18 | 0.10 |   |  |
| BP | 0040 regulation of development, heterochronic         | 1/292 | 233 | 258  | 861  | 1 |  |
|    | 034                                                   |       | 28  | 109  | 062  |   |  |
|    | GO:                                                   |       | 16/ | 0.18 | 0.10 |   |  |
| BP | 0042 negative regulation of protein import into       | 1/292 | 233 | 258  | 861  | 1 |  |
|    | 308 nucleus                                           |       | 28  | 109  | 062  |   |  |



|    |                                                  |       |     |      |      |   |
|----|--------------------------------------------------|-------|-----|------|------|---|
|    | GO:                                              |       | 16/ | 0.18 | 0.10 |   |
| BP | 0043 myelin maintenance                          | 1/292 | 233 | 258  | 861  | 1 |
|    | 217                                              |       | 28  | 109  | 062  |   |
|    | GO: negative regulation of DNA damage            |       | 16/ | 0.18 | 0.10 |   |
| BP | 0043 response, signal transduction by p53 class  | 1/292 | 233 | 258  | 861  | 1 |
|    | 518 mediator                                     |       | 28  | 109  | 062  |   |
|    | GO: modulation by symbiont of host cellular      |       | 16/ | 0.18 | 0.10 |   |
| BP | 0044 process                                     | 1/292 | 233 | 258  | 861  | 1 |
|    | 068                                              |       | 28  | 109  | 062  |   |
|    | GO: regulation of monocyte differentiation       |       | 16/ | 0.18 | 0.10 |   |
| BP | 0045                                             | 1/292 | 233 | 258  | 861  | 1 |
|    | 655                                              |       | 28  | 109  | 062  |   |
|    | GO: L-glutamate import                           |       | 16/ | 0.18 | 0.10 |   |
| BP | 0051                                             | 1/292 | 233 | 258  | 861  | 1 |
|    | 938                                              |       | 28  | 109  | 062  |   |
|    | GO: convergent extension                         |       | 16/ | 0.18 | 0.10 |   |
| BP | 0060                                             | 1/292 | 233 | 258  | 861  | 1 |
|    | 026                                              |       | 28  | 109  | 062  |   |
|    | GO: positive regulation of phagocytosis,         |       | 16/ | 0.18 | 0.10 |   |
| BP | 0060 engulfment                                  | 1/292 | 233 | 258  | 861  | 1 |
|    | 100                                              |       | 28  | 109  | 062  |   |
|    | GO: positive regulation of SMAD protein signal   |       | 16/ | 0.18 | 0.10 |   |
| BP | 0060 transduction                                | 1/292 | 233 | 258  | 861  | 1 |
|    | 391                                              |       | 28  | 109  | 062  |   |
|    | GO: establishment of blood-brain barrier         |       | 16/ | 0.18 | 0.10 |   |
| BP | 0060                                             | 1/292 | 233 | 258  | 861  | 1 |
|    | 856                                              |       | 28  | 109  | 062  |   |
|    | GO: negative regulation of dendritic spine       |       | 16/ | 0.18 | 0.10 |   |
| BP | 0061 development                                 | 1/292 | 233 | 258  | 861  | 1 |
|    | 000                                              |       | 28  | 109  | 062  |   |
|    | GO: cellular response to arsenic-containing      |       | 16/ | 0.18 | 0.10 |   |
| BP | 0071 substance                                   | 1/292 | 233 | 258  | 861  | 1 |
|    | 243                                              |       | 28  | 109  | 062  |   |
|    | GO: cellular response to low-density lipoprotein |       | 16/ | 0.18 | 0.10 |   |
| BP | 0071 particle stimulus                           | 1/292 | 233 | 258  | 861  | 1 |
|    | 404                                              |       | 28  | 109  | 062  |   |
|    | GO: cellular response to fluid shear stress      |       | 16/ | 0.18 | 0.10 |   |
| BP | 0071                                             | 1/292 | 233 | 258  | 861  | 1 |
|    | 498                                              |       | 28  | 109  | 062  |   |
|    | GO: otic vesicle development                     |       | 16/ | 0.18 | 0.10 |   |
| BP | 0071                                             | 1/292 | 233 | 258  | 861  | 1 |
|    | 599                                              |       | 28  | 109  | 062  |   |

|    |                                                     |       |     |      |      |   |
|----|-----------------------------------------------------|-------|-----|------|------|---|
|    | GO:                                                 |       | 16/ | 0.18 | 0.10 |   |
| BP | 0071 response to nitric oxide                       | 1/292 | 233 | 258  | 861  | 1 |
|    | 731                                                 |       | 28  | 109  | 062  |   |
|    | GO:                                                 |       | 16/ | 0.18 | 0.10 |   |
| BP | 0090 negative regulation of cell migration involved | 1/292 | 233 | 258  | 861  | 1 |
|    | 051 in sprouting angiogenesis                       |       | 28  | 109  | 062  |   |
|    | GO:                                                 |       | 16/ | 0.18 | 0.10 |   |
| BP | 0090 regulation of inclusion body assembly          | 1/292 | 233 | 258  | 861  | 1 |
|    | 083                                                 |       | 28  | 109  | 062  |   |
|    | GO:                                                 |       | 16/ | 0.18 | 0.10 |   |
| BP | 0090 epithelial cell-cell adhesion                  | 1/292 | 233 | 258  | 861  | 1 |
|    | 136                                                 |       | 28  | 109  | 062  |   |
|    | GO:                                                 |       | 16/ | 0.18 | 0.10 |   |
| BP | 0090 establishment of planar polarity involved in   | 1/292 | 233 | 258  | 861  | 1 |
|    | 177 neural tube closure                             |       | 28  | 109  | 062  |   |
|    | GO:                                                 |       | 16/ | 0.18 | 0.10 |   |
| BP | 0090 dopamine uptake                                | 1/292 | 233 | 258  | 861  | 1 |
|    | 494                                                 |       | 28  | 109  | 062  |   |
|    | GO:                                                 |       | 16/ | 0.18 | 0.10 |   |
| BP | 1903 regulation of plasma membrane organization     | 1/292 | 233 | 258  | 861  | 1 |
|    | 729                                                 |       | 28  | 109  | 062  |   |
|    | GO:                                                 |       | 16/ | 0.18 | 0.10 |   |
| BP | 1903 regulation of cardiac conduction               | 1/292 | 233 | 258  | 861  | 1 |
|    | 779                                                 |       | 28  | 109  | 062  |   |
|    | GO:                                                 |       | 16/ | 0.18 | 0.10 |   |
| BP | 1904 negative regulation of protein import          | 1/292 | 233 | 258  | 861  | 1 |
|    | 590                                                 |       | 28  | 109  | 062  |   |
|    | GO:                                                 |       | 16/ | 0.18 | 0.10 |   |
| BP | 1905 regulation of metallopeptidase activity        | 1/292 | 233 | 258  | 861  | 1 |
|    | 048                                                 |       | 28  | 109  | 062  |   |
|    | GO:                                                 |       | 16/ | 0.18 | 0.10 |   |
| BP | 1905 positive regulation of membrane                | 1/292 | 233 | 258  | 861  | 1 |
|    | 155 invagination                                    |       | 28  | 109  | 062  |   |
|    | GO:                                                 |       | 16/ | 0.18 | 0.10 |   |
| BP | 1905 positive regulation of gonad development       | 1/292 | 233 | 258  | 861  | 1 |
|    | 941                                                 |       | 28  | 109  | 062  |   |
|    | GO:                                                 |       | 16/ | 0.18 | 0.10 |   |
| BP | 2000 regulation of miRNA metabolic process          | 1/292 | 233 | 258  | 861  | 1 |
|    | 628                                                 |       | 28  | 109  | 062  |   |
|    | GO:                                                 |       | 16/ | 0.18 | 0.10 |   |
| BP | 2001 regulation of vasculogenesis                   | 1/292 | 233 | 258  | 861  | 1 |
|    | 212                                                 |       | 28  | 109  | 062  |   |

|    |                                                |       |     |      |      |   |
|----|------------------------------------------------|-------|-----|------|------|---|
|    | GO: regulation of cysteine-type endopeptidase  |       | 16/ | 0.18 | 0.10 |   |
| BP | 2001 activity involved in apoptotic signaling  | 1/292 | 233 | 258  | 861  | 1 |
|    | 267 pathway                                    |       | 28  | 109  | 062  |   |
|    | GO:                                            |       | 304 | 0.18 | 0.10 |   |
| BP | 0030 regulation of Wnt signaling pathway       | 6/292 | /23 | 291  | 877  | 6 |
|    | 111                                            |       | 328 | 662  | 515  |   |
|    | GO:                                            |       | 118 | 0.18 | 0.10 |   |
| BP | 0018 peptidyl-threonine phosphorylation        | 3/292 | /23 | 424  | 949  | 3 |
|    | 107                                            |       | 328 | 062  | 192  |   |
|    | GO:                                            |       | 118 | 0.18 | 0.10 |   |
| BP | 0030 flagellated sperm motility                | 3/292 | /23 | 424  | 949  | 3 |
|    | 317                                            |       | 328 | 062  | 192  |   |
|    | GO:                                            |       | 305 | 0.18 | 0.10 |   |
| BP | 0050 sensory perception of mechanical stimulus | 6/292 | /23 | 478  | 977  | 6 |
|    | 954                                            |       | 328 | 319  | 901  |   |
|    | GO:                                            |       | 63/ | 0.18 | 0.11 |   |
| BP | 0006 phosphatidylinositol biosynthetic process | 2/292 | 233 | 651  | 066  | 2 |
|    | 661                                            |       | 28  | 475  | 521  |   |
|    | GO:                                            |       | 63/ | 0.18 | 0.11 |   |
| BP | 0030 water homeostasis                         | 2/292 | 233 | 651  | 066  | 2 |
|    | 104                                            |       | 28  | 475  | 521  |   |
|    | GO:                                            |       | 63/ | 0.18 | 0.11 |   |
| BP | 0060 positive regulation of dendritic spine    | 2/292 | 233 | 651  | 066  | 2 |
|    | 999 development                                |       | 28  | 475  | 521  |   |
|    | GO:                                            |       | 63/ | 0.18 | 0.11 |   |
| BP | 0150 regulation of cell-substrate junction     | 2/292 | 233 | 651  | 066  | 2 |
|    | 116 organization                               |       | 28  | 475  | 521  |   |
|    | GO:                                            |       | 64/ | 0.19 | 0.11 |   |
| BP | 0007 rhythmic behavior                         | 2/292 | 233 | 103  | 248  | 2 |
|    | 622                                            |       | 28  | 933  | 922  |   |
|    | GO:                                            |       | 64/ | 0.19 | 0.11 |   |
| BP | 0015 long-chain fatty acid transport           | 2/292 | 233 | 103  | 248  | 2 |
|    | 909                                            |       | 28  | 933  | 922  |   |
|    | GO:                                            |       | 64/ | 0.19 | 0.11 |   |
| BP | 1902 regulation of sodium ion transmembrane    | 2/292 | 233 | 103  | 248  | 2 |
|    | 305 transport                                  |       | 28  | 933  | 922  |   |
|    | GO:                                            |       | 442 | 0.19 | 0.11 |   |
| BP | 1901 organic cyclic compound catabolic process | 8/292 | /23 | 162  | 248  | 8 |
|    | 361                                            |       | 328 | 172  | 922  |   |
|    | GO:                                            |       | 181 | 0.19 | 0.11 |   |
| BP | 0007 Rho protein signal transduction           | 4/292 | /23 | 217  | 248  | 4 |
|    | 266                                            |       | 328 | 187  | 922  |   |

|    |                                                                |       |     |      |      |   |
|----|----------------------------------------------------------------|-------|-----|------|------|---|
|    | GO:                                                            |       | 181 | 0.19 | 0.11 |   |
| BP | 0050 B cell receptor signaling pathway                         | 4/292 | 233 | 281  | 248  | 1 |
|    | 853                                                            |       | 28  | 986  | 922  |   |
|    | GO:                                                            |       | 177 | 0.19 | 0.11 |   |
| BP | 0001 mesodermal cell fate commitment                           | 1/292 | 233 | 281  | 248  | 1 |
|    | 710                                                            |       | 28  | 986  | 922  |   |
|    | GO:                                                            |       | 177 | 0.19 | 0.11 |   |
| BP | 0001 histamine secretion                                       | 1/292 | 233 | 281  | 248  | 1 |
|    | 821                                                            |       | 28  | 986  | 922  |   |
|    | GO:                                                            |       | 177 | 0.19 | 0.11 |   |
| BP | 0001 endothelial cell morphogenesis                            | 1/292 | 233 | 281  | 248  | 1 |
|    | 886                                                            |       | 28  | 986  | 922  |   |
|    | GO:                                                            |       | 177 | 0.19 | 0.11 |   |
| BP | 0001 suckling behavior                                         | 1/292 | 233 | 281  | 248  | 1 |
|    | 967                                                            |       | 28  | 986  | 922  |   |
|    | GO:                                                            |       | 177 | 0.19 | 0.11 |   |
| BP | 0006 glucocorticoid biosynthetic process                       | 1/292 | 233 | 281  | 248  | 1 |
|    | 704                                                            |       | 28  | 986  | 922  |   |
|    | GO:                                                            |       | 177 | 0.19 | 0.11 |   |
| BP | 0007 regulation of exit from mitosis                           | 1/292 | 233 | 281  | 248  | 1 |
|    | 096                                                            |       | 28  | 986  | 922  |   |
|    | GO:                                                            |       | 177 | 0.19 | 0.11 |   |
| BP | 0010 regulation of hydrogen peroxide metabolic process         | 1/292 | 233 | 281  | 248  | 1 |
|    | 310                                                            |       | 28  | 986  | 922  |   |
|    | GO:                                                            |       | 177 | 0.19 | 0.11 |   |
| BP | 0010 cholesterol storage                                       | 1/292 | 233 | 281  | 248  | 1 |
|    | 878                                                            |       | 28  | 986  | 922  |   |
|    | GO:                                                            |       | 177 | 0.19 | 0.11 |   |
| BP | 0019 nicotinamide nucleotide biosynthetic process              | 1/292 | 233 | 281  | 248  | 1 |
|    | 359                                                            |       | 28  | 986  | 922  |   |
|    | GO:                                                            |       | 177 | 0.19 | 0.11 |   |
| BP | 0031 negative regulation of cyclase activity                   | 1/292 | 233 | 281  | 248  | 1 |
|    | 280                                                            |       | 28  | 986  | 922  |   |
|    | GO:                                                            |       | 177 | 0.19 | 0.11 |   |
| BP | 0032 negative regulation of response to extracellular stimulus | 1/292 | 233 | 281  | 248  | 1 |
|    | 105                                                            |       | 28  | 986  | 922  |   |
|    | GO:                                                            |       | 177 | 0.19 | 0.11 |   |
| BP | 0032 negative regulation of response to nutrient levels        | 1/292 | 233 | 281  | 248  | 1 |
|    | 108                                                            |       | 28  | 986  | 922  |   |
|    | GO:                                                            |       | 177 | 0.19 | 0.11 |   |
| BP | 0032 negative regulation of chemokine production               | 1/292 | 233 | 281  | 248  | 1 |
|    | 682                                                            |       | 28  | 986  | 922  |   |

|    |                                                             |       |     |      |      |   |
|----|-------------------------------------------------------------|-------|-----|------|------|---|
|    | GO:                                                         |       | 17/ | 0.19 | 0.11 |   |
| BP | 0033 regulation of integrin activation                      | 1/292 | 233 | 281  | 248  | 1 |
|    | 623                                                         |       | 28  | 986  | 922  |   |
|    | GO:                                                         |       | 17/ | 0.19 | 0.11 |   |
| BP | 0034 iron ion transmembrane transport                       | 1/292 | 233 | 281  | 248  | 1 |
|    | 755                                                         |       | 28  | 986  | 922  |   |
|    | GO:                                                         |       | 17/ | 0.19 | 0.11 |   |
| BP | 0035 wound healing, spreading of epidermal cells            | 1/292 | 233 | 281  | 248  | 1 |
|    | 313                                                         |       | 28  | 986  | 922  |   |
|    | GO:                                                         |       | 17/ | 0.19 | 0.11 |   |
| BP | 0036 osteoclast development                                 | 1/292 | 233 | 281  | 248  | 1 |
|    | 035                                                         |       | 28  | 986  | 922  |   |
|    | GO:                                                         |       | 17/ | 0.19 | 0.11 |   |
| BP | 0042 cell migration involved in gastrulation                | 1/292 | 233 | 281  | 248  | 1 |
|    | 074                                                         |       | 28  | 986  | 922  |   |
|    | GO:                                                         |       | 17/ | 0.19 | 0.11 |   |
| BP | 0043 response to morphine                                   | 1/292 | 233 | 281  | 248  | 1 |
|    | 278                                                         |       | 28  | 986  | 922  |   |
|    | GO:                                                         |       | 17/ | 0.19 | 0.11 |   |
| BP | 0045 establishment of epithelial cell apical/basal polarity | 1/292 | 233 | 281  | 248  | 1 |
|    | 198                                                         |       | 28  | 986  | 922  |   |
|    | GO:                                                         |       | 17/ | 0.19 | 0.11 |   |
| BP | 0045 negative regulation of megakaryocyte differentiation   | 1/292 | 233 | 281  | 248  | 1 |
|    | 653                                                         |       | 28  | 986  | 922  |   |
|    | GO:                                                         |       | 17/ | 0.19 | 0.11 |   |
| BP | 0045 positive regulation of glycogen biosynthetic process   | 1/292 | 233 | 281  | 248  | 1 |
|    | 725                                                         |       | 28  | 986  | 922  |   |
|    | GO:                                                         |       | 17/ | 0.19 | 0.11 |   |
| BP | 0045 positive regulation of meiotic nuclear division        | 1/292 | 233 | 281  | 248  | 1 |
|    | 836                                                         |       | 28  | 986  | 922  |   |
|    | GO:                                                         |       | 17/ | 0.19 | 0.11 |   |
| BP | 0046 viral budding                                          | 1/292 | 233 | 281  | 248  | 1 |
|    | 755                                                         |       | 28  | 986  | 922  |   |
|    | GO:                                                         |       | 17/ | 0.19 | 0.11 |   |
| BP | 0048 lateral mesoderm development                           | 1/292 | 233 | 281  | 248  | 1 |
|    | 368                                                         |       | 28  | 986  | 922  |   |
|    | GO:                                                         |       | 17/ | 0.19 | 0.11 |   |
| BP | 0048 chemical homeostasis within a tissue                   | 1/292 | 233 | 281  | 248  | 1 |
|    | 875                                                         |       | 28  | 986  | 922  |   |
|    | GO:                                                         |       | 17/ | 0.19 | 0.11 |   |
| BP | 0050 hydrogen peroxide biosynthetic process                 | 1/292 | 233 | 281  | 248  | 1 |
|    | 665                                                         |       | 28  | 986  | 922  |   |

|    |                                                                                   |       |     |      |      |   |
|----|-----------------------------------------------------------------------------------|-------|-----|------|------|---|
|    | GO:                                                                               |       | 17/ | 0.19 | 0.11 |   |
| BP | 0051 regulation of lipoprotein lipase activity                                    | 1/292 | 233 | 281  | 248  | 1 |
|    | 004                                                                               |       | 28  | 986  | 922  |   |
|    | GO:                                                                               |       | 17/ | 0.19 | 0.11 |   |
| BP | 0060 ectodermal placode formation                                                 | 1/292 | 233 | 281  | 248  | 1 |
|    | 788                                                                               |       | 28  | 986  | 922  |   |
|    | GO:                                                                               |       | 17/ | 0.19 | 0.11 |   |
| BP | 0070 protein trimerization                                                        | 1/292 | 233 | 281  | 248  | 1 |
|    | 206                                                                               |       | 28  | 986  | 922  |   |
|    | GO:                                                                               |       | 17/ | 0.19 | 0.11 |   |
| BP | 0071 ectodermal placode morphogenesis                                             | 1/292 | 233 | 281  | 248  | 1 |
|    | 697                                                                               |       | 28  | 986  | 922  |   |
|    | GO:                                                                               |       | 17/ | 0.19 | 0.11 |   |
| BP | 0072 glomerular epithelium development                                            | 1/292 | 233 | 281  | 248  | 1 |
|    | 010                                                                               |       | 28  | 986  | 922  |   |
|    | GO:                                                                               |       | 17/ | 0.19 | 0.11 |   |
| BP | 0072 metanephric nephron tubule development                                       | 1/292 | 233 | 281  | 248  | 1 |
|    | 234                                                                               |       | 28  | 986  | 922  |   |
|    | GO:                                                                               |       | 17/ | 0.19 | 0.11 |   |
| BP | 0072 neutrophil extravasation                                                     | 1/292 | 233 | 281  | 248  | 1 |
|    | 672                                                                               |       | 28  | 986  | 922  |   |
|    | GO:                                                                               |       | 17/ | 0.19 | 0.11 |   |
| BP | 0090 negative regulation of kidney development                                    | 1/292 | 233 | 281  | 248  | 1 |
|    | 185                                                                               |       | 28  | 986  | 922  |   |
|    | GO:                                                                               |       | 17/ | 0.19 | 0.11 |   |
| BP | 0090 regulation of glomerulus development                                         | 1/292 | 233 | 281  | 248  | 1 |
|    | 192                                                                               |       | 28  | 986  | 922  |   |
|    | GO:                                                                               |       | 17/ | 0.19 | 0.11 |   |
| BP | 0090 positive regulation of brown fat cell differentiation                        | 1/292 | 233 | 281  | 248  | 1 |
|    | 336                                                                               |       | 28  | 986  | 922  |   |
|    | GO:                                                                               |       | 17/ | 0.19 | 0.11 |   |
| BP | 0090 catecholamine uptake                                                         | 1/292 | 233 | 281  | 248  | 1 |
|    | 493                                                                               |       | 28  | 986  | 922  |   |
|    | GO:                                                                               |       | 17/ | 0.19 | 0.11 |   |
| BP | 0098 spontaneous synaptic transmission                                            | 1/292 | 233 | 281  | 248  | 1 |
|    | 814                                                                               |       | 28  | 986  | 922  |   |
|    | GO:                                                                               |       | 17/ | 0.19 | 0.11 |   |
| BP | 1900 negative regulation of cytokine production involved in inflammatory response | 1/292 | 233 | 281  | 248  | 1 |
|    | 016                                                                               |       | 28  | 986  | 922  |   |
|    | GO:                                                                               |       | 17/ | 0.19 | 0.11 |   |
| BP | 1900 regulation of amyloid-beta clearance                                         | 1/292 | 233 | 281  | 248  | 1 |
|    | 221                                                                               |       | 28  | 986  | 922  |   |

|    |                                                                          |       |     |      |      |   |
|----|--------------------------------------------------------------------------|-------|-----|------|------|---|
|    | GO:                                                                      |       | 17/ | 0.19 | 0.11 |   |
| BP | 1900 regulation of long-term synaptic depression                         | 1/292 | 233 | 281  | 248  | 1 |
|    | 452                                                                      |       | 28  | 986  | 922  |   |
|    | GO:                                                                      |       | 17/ | 0.19 | 0.11 |   |
| BP | 1902 negative regulation of pri-miRNA transcription by RNA polymerase II | 1/292 | 233 | 281  | 248  | 1 |
|    | 894                                                                      |       | 28  | 986  | 922  |   |
|    | GO:                                                                      |       | 17/ | 0.19 | 0.11 |   |
| BP | 1904 regulation of excitatory synapse assembly                           | 1/292 | 233 | 281  | 248  | 1 |
|    | 889                                                                      |       | 28  | 986  | 922  |   |
|    | GO:                                                                      |       | 17/ | 0.19 | 0.11 |   |
| BP | 2000 regulation of cell-cell adhesion mediated by cadherin               | 1/292 | 233 | 281  | 248  | 1 |
|    | 047                                                                      |       | 28  | 986  | 922  |   |
|    | GO:                                                                      |       | 17/ | 0.19 | 0.11 |   |
| BP | 2000 regulation of mesoderm development                                  | 1/292 | 233 | 281  | 248  | 1 |
|    | 380                                                                      |       | 28  | 986  | 922  |   |
|    | GO:                                                                      |       | 17/ | 0.19 | 0.11 |   |
| BP | 2000 regulation of cAMP-dependent protein kinase activity                | 1/292 | 233 | 281  | 248  | 1 |
|    | 479                                                                      |       | 28  | 986  | 922  |   |
|    | GO:                                                                      |       | 121 | 0.19 | 0.11 |   |
| BP | 0022 metencephalon development                                           | 3/292 | /23 | 371  | 290  | 3 |
|    | 037                                                                      |       | 328 | 395  | 373  |   |
|    | GO:                                                                      |       | 121 | 0.19 | 0.11 |   |
| BP | 0097 sperm motility                                                      | 3/292 | /23 | 371  | 290  | 3 |
|    | 722                                                                      |       | 328 | 395  | 373  |   |
|    | GO:                                                                      |       | 121 | 0.19 | 0.11 |   |
| BP | 1901 carbohydrate derivative catabolic process                           | 3/292 | /23 | 371  | 290  | 3 |
|    | 136                                                                      |       | 328 | 395  | 373  |   |
|    | GO:                                                                      |       | 245 | 0.19 | 0.11 |   |
| BP | 0006 neurotransmitter transport                                          | 5/292 | /23 | 418  | 314  | 5 |
|    | 836                                                                      |       | 328 | 891  | 482  |   |
|    | GO:                                                                      |       | 182 | 0.19 | 0.11 |   |
| BP | 0048 eye morphogenesis                                                   | 4/292 | /23 | 471  | 341  | 4 |
|    | 592                                                                      |       | 328 | 085  | 312  |   |
|    | GO:                                                                      |       | 122 | 0.19 | 0.11 |   |
| BP | 1903 negative regulation of cellular protein localization                | 3/292 | /23 | 689  | 465  | 3 |
|    | 828                                                                      |       | 328 | 854  | 119  |   |
|    | GO:                                                                      |       | 123 | 0.20 | 0.11 |   |
| BP | 0009 nucleoside diphosphate metabolic process                            | 3/292 | /23 | 009  | 631  | 3 |
|    | 132                                                                      |       | 328 | 588  | 317  |   |
|    | GO:                                                                      |       | 123 | 0.20 | 0.11 |   |
| BP | 0010 regulation of phosphatase activity                                  | 3/292 | /23 | 009  | 631  | 3 |
|    | 921                                                                      |       | 328 | 588  | 317  |   |

|    |                                                               |       |     |      |      |   |
|----|---------------------------------------------------------------|-------|-----|------|------|---|
|    | GO:                                                           |       | 123 | 0.20 | 0.11 |   |
| BP | 0046 glycerophospholipid biosynthetic process                 | 3/292 | /23 | 009  | 631  | 3 |
|    | 474                                                           |       | 328 | 588  | 317  |   |
|    | GO:                                                           |       | 66/ | 0.20 | 0.11 |   |
| BP | 0042 pigment metabolic process                                | 2/292 | 233 | 013  | 631  | 2 |
|    | 440                                                           |       | 28  | 097  | 317  |   |
|    | GO:                                                           |       | 66/ | 0.20 | 0.11 |   |
| BP | 0050 regulation of catecholamine secretion                    | 2/292 | 233 | 013  | 631  | 2 |
|    | 433                                                           |       | 28  | 097  | 317  |   |
|    | GO:                                                           |       | 66/ | 0.20 | 0.11 |   |
| BP | 2000 regulation of stem cell differentiation                  | 2/292 | 233 | 013  | 631  | 2 |
|    | 736                                                           |       | 28  | 097  | 317  |   |
|    | GO:                                                           |       | 185 | 0.20 | 0.11 |   |
| BP | 0071 cellular response to acid chemical                       | 4/292 | /23 | 238  | 687  | 4 |
|    | 229                                                           |       | 328 | 96   | 29   |   |
|    | GO:                                                           |       | 18/ | 0.20 | 0.11 |   |
| BP | 0001 serotonin secretion                                      | 1/292 | 233 | 293  | 687  | 1 |
|    | 820                                                           |       | 28  | 082  | 29   |   |
|    | GO:                                                           |       | 18/ | 0.20 | 0.11 |   |
| BP | 0002 neutrophil activation involved in immune response        | 1/292 | 233 | 293  | 687  | 1 |
|    | 283                                                           |       | 28  | 082  | 29   |   |
|    | GO:                                                           |       | 18/ | 0.20 | 0.11 |   |
| BP | 0003 heart field specification                                | 1/292 | 233 | 293  | 687  | 1 |
|    | 128                                                           |       | 28  | 082  | 29   |   |
|    | GO:                                                           |       | 18/ | 0.20 | 0.11 |   |
| BP | 0009 post-embryonic animal morphogenesis                      | 1/292 | 233 | 293  | 687  | 1 |
|    | 886                                                           |       | 28  | 082  | 29   |   |
|    | GO:                                                           |       | 18/ | 0.20 | 0.11 |   |
| BP | 0010 cardioblast differentiation                              | 1/292 | 233 | 293  | 687  | 1 |
|    | 002                                                           |       | 28  | 082  | 29   |   |
|    | GO:                                                           |       | 18/ | 0.20 | 0.11 |   |
| BP | 0010 positive regulation of triglyceride biosynthetic process | 1/292 | 233 | 293  | 687  | 1 |
|    | 867                                                           |       | 28  | 082  | 29   |   |
|    | GO:                                                           |       | 18/ | 0.20 | 0.11 |   |
| BP | 0010 regulation of inositol phosphate biosynthetic process    | 1/292 | 233 | 293  | 687  | 1 |
|    | 919                                                           |       | 28  | 082  | 29   |   |
|    | GO:                                                           |       | 18/ | 0.20 | 0.11 |   |
| BP | 0014 response to isoquinoline alkaloid                        | 1/292 | 233 | 293  | 687  | 1 |
|    | 072                                                           |       | 28  | 082  | 29   |   |
|    | GO:                                                           |       | 18/ | 0.20 | 0.11 |   |
| BP | 0021 dentate gyrus development                                | 1/292 | 233 | 293  | 687  | 1 |
|    | 542                                                           |       | 28  | 082  | 29   |   |



|    |                                                               |       |     |      |      |   |
|----|---------------------------------------------------------------|-------|-----|------|------|---|
|    | GO:                                                           |       | 18/ | 0.20 | 0.11 |   |
| BP | 0021 cerebellar Purkinje cell differentiation                 | 1/292 | 233 | 293  | 687  | 1 |
|    | 702                                                           |       | 28  | 082  | 29   |   |
|    | GO:                                                           |       | 18/ | 0.20 | 0.11 |   |
| BP | 0021 striatum development                                     | 1/292 | 233 | 293  | 687  | 1 |
|    | 756                                                           |       | 28  | 082  | 29   |   |
|    | GO:                                                           |       | 18/ | 0.20 | 0.11 |   |
| BP | 0030 microvillus assembly                                     | 1/292 | 233 | 293  | 687  | 1 |
|    | 033                                                           |       | 28  | 082  | 29   |   |
|    | GO:                                                           |       | 18/ | 0.20 | 0.11 |   |
| BP | 0033 cell-cell adhesion mediated by integrin                  | 1/292 | 233 | 293  | 687  | 1 |
|    | 631                                                           |       | 28  | 082  | 29   |   |
|    | GO:                                                           |       | 18/ | 0.20 | 0.11 |   |
| BP | 0035 maintenance of blood-brain barrier                       | 1/292 | 233 | 293  | 687  | 1 |
|    | 633                                                           |       | 28  | 082  | 29   |   |
|    | GO:                                                           |       | 18/ | 0.20 | 0.11 |   |
| BP | 0042 establishment of planar polarity of embryonic epithelium | 1/292 | 233 | 293  | 687  | 1 |
|    | 249                                                           |       | 28  | 082  | 29   |   |
|    | GO:                                                           |       | 18/ | 0.20 | 0.11 |   |
| BP | 0044 lipid digestion                                          | 1/292 | 233 | 293  | 687  | 1 |
|    | 241                                                           |       | 28  | 082  | 29   |   |
|    | GO:                                                           |       | 18/ | 0.20 | 0.11 |   |
| BP | 0044 adhesion of symbiont to host                             | 1/292 | 233 | 293  | 687  | 1 |
|    | 406                                                           |       | 28  | 082  | 29   |   |
|    | GO:                                                           |       | 18/ | 0.20 | 0.11 |   |
| BP | 0045 negative regulation of nitric oxide biosynthetic process | 1/292 | 233 | 293  | 687  | 1 |
|    | 019                                                           |       | 28  | 082  | 29   |   |
|    | GO:                                                           |       | 18/ | 0.20 | 0.11 |   |
| BP | 0050 regulation of B cell receptor signaling pathway          | 1/292 | 233 | 293  | 687  | 1 |
|    | 855                                                           |       | 28  | 082  | 29   |   |
|    | GO:                                                           |       | 18/ | 0.20 | 0.11 |   |
| BP | 0050 white fat cell differentiation                           | 1/292 | 233 | 293  | 687  | 1 |
|    | 872                                                           |       | 28  | 082  | 29   |   |
|    | GO:                                                           |       | 18/ | 0.20 | 0.11 |   |
| BP | 0060 response to growth hormone                               | 1/292 | 233 | 293  | 687  | 1 |
|    | 416                                                           |       | 28  | 082  | 29   |   |
|    | GO:                                                           |       | 18/ | 0.20 | 0.11 |   |
| BP | 0070 interleukin-6-mediated signaling pathway                 | 1/292 | 233 | 293  | 687  | 1 |
|    | 102                                                           |       | 28  | 082  | 29   |   |
|    | GO:                                                           |       | 18/ | 0.20 | 0.11 |   |
| BP | 0071 ectodermal placode development                           | 1/292 | 233 | 293  | 687  | 1 |
|    | 696                                                           |       | 28  | 082  | 29   |   |

|    |                                                               |       |     |      |      |   |
|----|---------------------------------------------------------------|-------|-----|------|------|---|
|    | GO:                                                           |       | 18/ | 0.20 | 0.11 |   |
| BP | 0072 epithelial cell fate commitment                          | 1/292 | 233 | 293  | 687  | 1 |
|    | 148                                                           |       | 28  | 082  | 29   |   |
|    | GO:                                                           |       | 18/ | 0.20 | 0.11 |   |
| BP | 0098 intestinal lipid absorption                              | 1/292 | 233 | 293  | 687  | 1 |
|    | 856                                                           |       | 28  | 082  | 29   |   |
|    | GO:                                                           |       | 18/ | 0.20 | 0.11 |   |
| BP | 1904 negative regulation of nitric oxide metabolic process    | 1/292 | 233 | 293  | 687  | 1 |
|    | 406                                                           |       | 28  | 082  | 29   |   |
|    | GO:                                                           |       | 18/ | 0.20 | 0.11 |   |
| BP | 2000 regulation of T-helper 17 cell differentiation           | 1/292 | 233 | 293  | 687  | 1 |
|    | 319                                                           |       | 28  | 082  | 29   |   |
|    | GO:                                                           |       | 18/ | 0.20 | 0.11 |   |
| BP | 2001 regulation of CD8-positive, alpha-beta T cell activation | 1/292 | 233 | 293  | 687  | 1 |
|    | 185                                                           |       | 28  | 082  | 29   |   |
|    | GO:                                                           |       | 124 | 0.20 | 0.11 |   |
| BP | 0051 regulation of synapse assembly                           | 3/292 | /23 | 330  | 705  | 3 |
|    | 963                                                           |       | 328 | 559  | 22   |   |
|    | GO:                                                           |       | 67/ | 0.20 | 0.11 |   |
| BP | 0021 cerebellar cortex development                            | 2/292 | 233 | 469  | 763  | 2 |
|    | 695                                                           |       | 28  | 593  | 247  |   |
|    | GO:                                                           |       | 67/ | 0.20 | 0.11 |   |
| BP | 0030 myofibril assembly                                       | 2/292 | 233 | 469  | 763  | 2 |
|    | 239                                                           |       | 28  | 593  | 247  |   |
|    | GO:                                                           |       | 67/ | 0.20 | 0.11 |   |
| BP | 0086 cardiac muscle cell contraction                          | 2/292 | 233 | 469  | 763  | 2 |
|    | 003                                                           |       | 28  | 593  | 247  |   |
|    | GO:                                                           |       | 67/ | 0.20 | 0.11 |   |
| BP | 0090 mitotic spindle assembly                                 | 2/292 | 233 | 469  | 763  | 2 |
|    | 307                                                           |       | 28  | 593  | 247  |   |
|    | GO:                                                           |       | 67/ | 0.20 | 0.11 |   |
| BP | 1903 positive regulation of regulated secretory pathway       | 2/292 | 233 | 469  | 763  | 2 |
|    | 307                                                           |       | 28  | 593  | 247  |   |
|    | GO:                                                           |       | 67/ | 0.20 | 0.11 |   |
| BP | 2000 regulation of peptidyl-lysine acetylation                | 2/292 | 233 | 469  | 763  | 2 |
|    | 756                                                           |       | 28  | 593  | 247  |   |
|    | GO:                                                           |       | 317 | 0.20 | 0.11 |   |
| BP | 0051 meiotic cell cycle                                       | 6/292 | /23 | 774  | 934  | 6 |
|    | 321                                                           |       | 328 | 856  | 955  |   |
|    | GO:                                                           |       | 68/ | 0.20 | 0.11 |   |
| BP | 0007 embryo implantation                                      | 2/292 | 233 | 927  | 988  | 2 |
|    | 566                                                           |       | 28  | 228  | 899  |   |

|    |                                                       |       |     |      |      |   |
|----|-------------------------------------------------------|-------|-----|------|------|---|
|    | GO:                                                   |       | 68/ | 0.20 | 0.11 |   |
| BP | 0030 lamellipodium assembly                           | 2/292 | 233 | 927  | 988  | 2 |
|    | 032                                                   |       | 28  | 228  | 899  |   |
|    | GO:                                                   |       | 68/ | 0.20 | 0.11 |   |
| BP | 0033 cellular polysaccharide biosynthetic process     | 2/292 | 233 | 927  | 988  | 2 |
|    | 692                                                   |       | 28  | 228  | 899  |   |
|    | GO:                                                   |       | 68/ | 0.20 | 0.11 |   |
| BP | 0043 regulation of cAMP-mediated signaling            | 2/292 | 233 | 927  | 988  | 2 |
|    | 949                                                   |       | 28  | 228  | 899  |   |
|    | GO:                                                   |       | 68/ | 0.20 | 0.11 |   |
| BP | 0048 regulation of skeletal muscle tissue development | 2/292 | 233 | 927  | 988  | 2 |
|    | 641                                                   |       | 28  | 228  | 899  |   |
|    | GO:                                                   |       | 68/ | 0.20 | 0.11 |   |
| BP | 0050 catecholamine secretion                          | 2/292 | 233 | 927  | 988  | 2 |
|    | 432                                                   |       | 28  | 228  | 899  |   |
|    | GO:                                                   |       | 68/ | 0.20 | 0.11 |   |
| BP | 0071 cellular response to monoamine stimulus          | 2/292 | 233 | 927  | 988  | 2 |
|    | 868                                                   |       | 28  | 228  | 899  |   |
|    | GO:                                                   |       | 68/ | 0.20 | 0.11 |   |
| BP | 0071 cellular response to catecholamine stimulus      | 2/292 | 233 | 927  | 988  | 2 |
|    | 870                                                   |       | 28  | 228  | 899  |   |
|    | GO:                                                   |       | 68/ | 0.20 | 0.11 |   |
| BP | 1902 negative regulation of RNA catabolic process     | 2/292 | 233 | 927  | 988  | 2 |
|    | 369                                                   |       | 28  | 228  | 899  |   |
|    | GO:                                                   |       | 126 | 0.20 | 0.12 |   |
| BP | 0036 cellular response to decreased oxygen levels     | 3/292 | /23 | 976  | 013  | 3 |
|    | 294                                                   |       | 328 | 059  | 143  |   |
|    | GO:                                                   |       | 188 | 0.21 | 0.12 |   |
| BP | 0031 cellular response to nutrient levels             | 4/292 | /23 | 015  | 032  | 4 |
|    | 669                                                   |       | 328 | 701  | 113  |   |
|    | GO:                                                   |       | 253 | 0.21 | 0.12 |   |
| BP | 0048 skeletal system morphogenesis                    | 5/292 | /23 | 175  | 075  | 5 |
|    | 705                                                   |       | 328 | 345  | 284  |   |
|    | GO:                                                   |       | 19/ | 0.21 | 0.12 |   |
| BP | 0001 response to amphetamine                          | 1/292 | 233 | 291  | 075  | 1 |
|    | 975                                                   |       | 28  | 556  | 284  |   |
|    | GO:                                                   |       | 19/ | 0.21 | 0.12 |   |
| BP | 0002 G protein-coupled receptor internalization       | 1/292 | 233 | 291  | 075  | 1 |
|    | 031                                                   |       | 28  | 556  | 284  |   |
|    | GO:                                                   |       | 19/ | 0.21 | 0.12 |   |
| BP | 0006 apoptotic DNA fragmentation                      | 1/292 | 233 | 291  | 075  | 1 |
|    | 309                                                   |       | 28  | 556  | 284  |   |

|    |                                                          |       |     |      |      |   |
|----|----------------------------------------------------------|-------|-----|------|------|---|
|    | GO:                                                      |       | 19/ | 0.21 | 0.12 |   |
| BP | 0006 arginine metabolic process                          | 1/292 | 233 | 291  | 075  | 1 |
|    | 525                                                      |       | 28  | 556  | 284  |   |
|    | GO:                                                      |       | 19/ | 0.21 | 0.12 |   |
| BP | 0006 thyroid hormone generation                          | 1/292 | 233 | 291  | 075  | 1 |
|    | 590                                                      |       | 28  | 556  | 284  |   |
|    | GO:                                                      |       | 19/ | 0.21 | 0.12 |   |
| BP | 0009 aromatic amino acid family catabolic process        | 1/292 | 233 | 291  | 075  | 1 |
|    | 074                                                      |       | 28  | 556  | 284  |   |
|    | GO:                                                      |       | 19/ | 0.21 | 0.12 |   |
| BP | 0010 negative regulation of platelet activation          | 1/292 | 233 | 291  | 075  | 1 |
|    | 544                                                      |       | 28  | 556  | 284  |   |
|    | GO:                                                      |       | 19/ | 0.21 | 0.12 |   |
| BP | 0014 regulation of norepinephrine secretion              | 1/292 | 233 | 291  | 075  | 1 |
|    | 061                                                      |       | 28  | 556  | 284  |   |
|    | GO:                                                      |       | 19/ | 0.21 | 0.12 |   |
| BP | 0016 peptide hormone processing                          | 1/292 | 233 | 291  | 075  | 1 |
|    | 486                                                      |       | 28  | 556  | 284  |   |
|    | GO:                                                      |       | 19/ | 0.21 | 0.12 |   |
| BP | 0017 plasma membrane phospholipid scrambling             | 1/292 | 233 | 291  | 075  | 1 |
|    | 121                                                      |       | 28  | 556  | 284  |   |
|    | GO:                                                      |       | 19/ | 0.21 | 0.12 |   |
| BP | 0021 cerebellar Purkinje cell layer formation            | 1/292 | 233 | 291  | 075  | 1 |
|    | 694                                                      |       | 28  | 556  | 284  |   |
|    | GO:                                                      |       | 19/ | 0.21 | 0.12 |   |
| BP | 0030 negative regulation of bone mineralization          | 1/292 | 233 | 291  | 075  | 1 |
|    | 502                                                      |       | 28  | 556  | 284  |   |
|    | GO:                                                      |       | 19/ | 0.21 | 0.12 |   |
| BP | 0032 regulation of natural killer cell differentiation   | 1/292 | 233 | 291  | 075  | 1 |
|    | 823                                                      |       | 28  | 556  | 284  |   |
|    | GO:                                                      |       | 19/ | 0.21 | 0.12 |   |
| BP | 0034 negative regulation of homotypic cell-cell adhesion | 1/292 | 233 | 291  | 075  | 1 |
|    | 111                                                      |       | 28  | 556  | 284  |   |
|    | GO:                                                      |       | 19/ | 0.21 | 0.12 |   |
| BP | 0046 cGMP metabolic process                              | 1/292 | 233 | 291  | 075  | 1 |
|    | 068                                                      |       | 28  | 556  | 284  |   |
|    | GO:                                                      |       | 19/ | 0.21 | 0.12 |   |
| BP | 0046 positive regulation of fatty acid oxidation         | 1/292 | 233 | 291  | 075  | 1 |
|    | 321                                                      |       | 28  | 556  | 284  |   |
|    | GO:                                                      |       | 19/ | 0.21 | 0.12 |   |
| BP | 0048 norepinephrine secretion                            | 1/292 | 233 | 291  | 075  | 1 |
|    | 243                                                      |       | 28  | 556  | 284  |   |

|    |      |                                                                  |       |      |      |     |   |
|----|------|------------------------------------------------------------------|-------|------|------|-----|---|
|    | GO:  |                                                                  | 19/   | 0.21 | 0.12 |     |   |
| BP | 0048 | negative regulation of astrocyte differentiation                 | 1/292 | 233  | 291  | 075 | 1 |
|    | 712  |                                                                  |       | 28   | 556  | 284 |   |
|    | GO:  |                                                                  | 19/   | 0.21 | 0.12 |     |   |
| BP | 0051 | negative regulation of lyase activity                            | 1/292 | 233  | 291  | 075 | 1 |
|    | 350  |                                                                  |       | 28   | 556  | 284 |   |
|    | GO:  |                                                                  | 19/   | 0.21 | 0.12 |     |   |
| BP | 0060 | anatomical structure regression                                  | 1/292 | 233  | 291  | 075 | 1 |
|    | 033  |                                                                  |       | 28   | 556  | 284 |   |
|    | GO:  |                                                                  | 19/   | 0.21 | 0.12 |     |   |
| BP | 0060 | negative regulation of cardiac muscle cell proliferation         | 1/292 | 233  | 291  | 075 | 1 |
|    | 044  |                                                                  |       | 28   | 556  | 284 |   |
|    | GO:  |                                                                  | 19/   | 0.21 | 0.12 |     |   |
| BP | 0060 | regulation of phagocytosis, engulfment                           | 1/292 | 233  | 291  | 075 | 1 |
|    | 099  |                                                                  |       | 28   | 556  | 284 |   |
|    | GO:  |                                                                  | 19/   | 0.21 | 0.12 |     |   |
| BP | 0070 | positive regulation of glycogen metabolic process                | 1/292 | 233  | 291  | 075 | 1 |
|    | 875  |                                                                  |       | 28   | 556  | 284 |   |
|    | GO:  |                                                                  | 19/   | 0.21 | 0.12 |     |   |
| BP | 0071 | regulation of phospholipid biosynthetic process                  | 1/292 | 233  | 291  | 075 | 1 |
|    | 071  |                                                                  |       | 28   | 556  | 284 |   |
|    | GO:  |                                                                  | 19/   | 0.21 | 0.12 |     |   |
| BP | 0090 | negative regulation of release of cytochrome c from mitochondria | 1/292 | 233  | 291  | 075 | 1 |
|    | 201  |                                                                  |       | 28   | 556  | 284 |   |
|    | GO:  |                                                                  | 19/   | 0.21 | 0.12 |     |   |
| BP | 1903 | negative regulation of anion transmembrane transport             | 1/292 | 233  | 291  | 075 | 1 |
|    | 960  |                                                                  |       | 28   | 556  | 284 |   |
|    | GO:  |                                                                  | 19/   | 0.21 | 0.12 |     |   |
| BP | 1904 | regulation of GTP binding                                        | 1/292 | 233  | 291  | 075 | 1 |
|    | 424  |                                                                  |       | 28   | 556  | 284 |   |
|    | GO:  |                                                                  | 127   | 0.21 | 0.12 |     |   |
| BP | 0008 | regulation of G protein-coupled receptor signaling pathway       | 3/292 | /23  | 300  | 075 | 3 |
|    | 277  |                                                                  |       | 328  | 512  | 284 |   |
|    | GO:  |                                                                  | 127   | 0.21 | 0.12 |     |   |
| BP | 0018 | peptidyl-threonine modification                                  | 3/292 | /23  | 300  | 075 | 3 |
|    | 210  |                                                                  |       | 328  | 512  | 284 |   |
|    | GO:  |                                                                  | 127   | 0.21 | 0.12 |     |   |
| BP | 0060 | cardiac muscle contraction                                       | 3/292 | /23  | 300  | 075 | 3 |
|    | 048  |                                                                  |       | 328  | 512  | 284 |   |
|    | GO:  |                                                                  | 127   | 0.21 | 0.12 |     |   |
| BP | 0060 | dendritic spine development                                      | 3/292 | /23  | 300  | 075 | 3 |
|    | 996  |                                                                  |       | 328  | 512  | 284 |   |

|    |                                                    |       |     |      |      |   |
|----|----------------------------------------------------|-------|-----|------|------|---|
|    | GO:                                                |       | 69/ | 0.21 | 0.12 |   |
| BP | 0001 T cell mediated cytotoxicity                  | 2/292 | 233 | 385  | 105  | 2 |
|    | 913                                                |       | 28  | 902  | 097  |   |
|    | GO:                                                |       | 69/ | 0.21 | 0.12 |   |
| BP | 0008 visual learning                               | 2/292 | 233 | 385  | 105  | 2 |
|    | 542                                                |       | 28  | 902  | 097  |   |
|    | GO:                                                |       | 69/ | 0.21 | 0.12 |   |
| BP | 0031 zymogen activation                            | 2/292 | 233 | 385  | 105  | 2 |
|    | 638                                                |       | 28  | 902  | 097  |   |
|    | GO:                                                |       | 69/ | 0.21 | 0.12 |   |
| BP | 0071 response to monoamine                         | 2/292 | 233 | 385  | 105  | 2 |
|    | 867                                                |       | 28  | 902  | 097  |   |
|    | GO:                                                |       | 69/ | 0.21 | 0.12 |   |
| BP | 0071 response to catecholamine                     | 2/292 | 233 | 385  | 105  | 2 |
|    | 869                                                |       | 28  | 902  | 097  |   |
|    | GO:                                                |       | 254 | 0.21 | 0.12 |   |
| BP | 0006 RNA catabolic process                         | 5/292 | /23 | 398  | 108  | 5 |
|    | 401                                                |       | 328 | 452  | 487  |   |
|    | GO:                                                |       | 190 | 0.21 | 0.12 |   |
| BP | 0120 regulation of plasma membrane bounded         | 4/292 | /23 | 538  | 183  | 4 |
|    | 032 cell projection assembly                       |       | 328 | 198  | 827  |   |
|    | GO:                                                |       | 128 | 0.21 | 0.12 |   |
| BP | 0051 response to calcium ion                       | 3/292 | /23 | 626  | 226  | 3 |
|    | 592                                                |       | 328 | 05   | 027  |   |
|    | GO:                                                |       | 128 | 0.21 | 0.12 |   |
| BP | 0061 regulation of mRNA catabolic process          | 3/292 | /23 | 626  | 226  | 3 |
|    | 013                                                |       | 328 | 05   | 027  |   |
|    | GO:                                                |       | 70/ | 0.21 | 0.12 |   |
| BP | 0043 cellular component maintenance                | 2/292 | 233 | 845  | 338  | 2 |
|    | 954                                                |       | 28  | 519  | 761  |   |
|    | GO:                                                |       | 70/ | 0.21 | 0.12 |   |
| BP | 0055 regulation of cardiac muscle contraction      | 2/292 | 233 | 845  | 338  | 2 |
|    | 117                                                |       | 28  | 519  | 761  |   |
|    | GO:                                                |       | 70/ | 0.21 | 0.12 |   |
| BP | 2000 positive regulation of neural precursor cell  | 2/292 | 233 | 845  | 338  | 2 |
|    | 179 proliferation                                  |       | 28  | 519  | 761  |   |
|    | GO:                                                |       | 129 | 0.21 | 0.12 |   |
| BP | 0032 positive regulation of protein polymerization | 3/292 | /23 | 952  | 391  | 3 |
|    | 273                                                |       | 328 | 636  | 676  |   |
|    | GO:                                                |       | 129 | 0.21 | 0.12 |   |
| BP | 0060 cilium movement involved in cell motility     | 3/292 | /23 | 952  | 391  | 3 |
|    | 294                                                |       | 328 | 636  | 676  |   |

|    |                                                                    |       |     |      |      |   |
|----|--------------------------------------------------------------------|-------|-----|------|------|---|
|    | GO:                                                                |       | 192 | 0.22 | 0.12 |   |
| BP | 0060 regulation of cell projection assembly                        | 4/292 | /23 | 064  | 450  | 4 |
|    | 491                                                                |       | 328 | 25   | 871  |   |
|    | GO:                                                                |       | 257 | 0.22 | 0.12 |   |
| BP | 0001 regulation of neurotransmitter levels                         | 5/292 | /23 | 072  | 451  | 5 |
|    | 505                                                                |       | 328 | 228  | 565  |   |
|    | GO:                                                                |       | 324 | 0.22 | 0.12 |   |
| BP | 0009 purine ribonucleotide metabolic process                       | 6/292 | /23 | 159  | 481  | 6 |
|    | 150                                                                |       | 328 | 447  | 145  |   |
|    | GO:                                                                |       | 20/ | 0.22 | 0.12 |   |
| BP | 0001 gastric acid secretion                                        | 1/292 | 233 | 277  | 481  | 1 |
|    | 696                                                                |       | 28  | 564  | 145  |   |
|    | GO:                                                                |       | 20/ | 0.22 | 0.12 |   |
| BP | 0006 manganese ion transport                                       | 1/292 | 233 | 277  | 481  | 1 |
|    | 828                                                                |       | 28  | 564  | 145  |   |
|    | GO:                                                                |       | 20/ | 0.22 | 0.12 |   |
| BP | 0006 cellular sodium ion homeostasis                               | 1/292 | 233 | 277  | 481  | 1 |
|    | 883                                                                |       | 28  | 564  | 145  |   |
|    | GO:                                                                |       | 20/ | 0.22 | 0.12 |   |
| BP | 0019 pyridine nucleotide biosynthetic process                      | 1/292 | 233 | 277  | 481  | 1 |
|    | 363                                                                |       | 28  | 564  | 145  |   |
|    | GO:                                                                |       | 20/ | 0.22 | 0.12 |   |
| BP | 0021 cell migration in hindbrain                                   | 1/292 | 233 | 277  | 481  | 1 |
|    | 535                                                                |       | 28  | 564  | 145  |   |
|    | GO:                                                                |       | 20/ | 0.22 | 0.12 |   |
| BP | 0030 cellular anion homeostasis                                    | 1/292 | 233 | 277  | 481  | 1 |
|    | 002                                                                |       | 28  | 564  | 145  |   |
|    | GO:                                                                |       | 20/ | 0.22 | 0.12 |   |
| BP | 0030 cellular monovalent inorganic anion homeostasis               | 1/292 | 233 | 277  | 481  | 1 |
|    | 320                                                                |       | 28  | 564  | 145  |   |
|    | GO:                                                                |       | 20/ | 0.22 | 0.12 |   |
| BP | 0030 regulation of granulocyte differentiation                     | 1/292 | 233 | 277  | 481  | 1 |
|    | 852                                                                |       | 28  | 564  | 145  |   |
|    | GO:                                                                |       | 20/ | 0.22 | 0.12 |   |
| BP | 0032 regulation of response to food                                | 1/292 | 233 | 277  | 481  | 1 |
|    | 095                                                                |       | 28  | 564  | 145  |   |
|    | GO:                                                                |       | 20/ | 0.22 | 0.12 |   |
| BP | 0035 calcium-mediated signaling using intracellular calcium source | 1/292 | 233 | 277  | 481  | 1 |
|    | 584                                                                |       | 28  | 564  | 145  |   |
|    | GO:                                                                |       | 20/ | 0.22 | 0.12 |   |
| BP | 0045 cell-cell junction maintenance                                | 1/292 | 233 | 277  | 481  | 1 |
|    | 217                                                                |       | 28  | 564  | 145  |   |

|    |                                                                         |       |     |      |      |   |  |
|----|-------------------------------------------------------------------------|-------|-----|------|------|---|--|
|    | GO:                                                                     |       | 20/ | 0.22 | 0.12 |   |  |
| BP | 0045 positive regulation of gluconeogenesis                             | 1/292 | 233 | 277  | 481  | 1 |  |
|    | 722                                                                     |       | 28  | 564  | 145  |   |  |
|    | GO:                                                                     |       | 20/ | 0.22 | 0.12 |   |  |
| BP | 0048 regulation of short-term neuronal synaptic plasticity              | 1/292 | 233 | 277  | 481  | 1 |  |
|    | 172                                                                     |       | 28  | 564  | 145  |   |  |
|    | GO:                                                                     |       | 20/ | 0.22 | 0.12 |   |  |
| BP | 0048 embryonic digestive tract morphogenesis                            | 1/292 | 233 | 277  | 481  | 1 |  |
|    | 557                                                                     |       | 28  | 564  | 145  |   |  |
|    | GO:                                                                     |       | 20/ | 0.22 | 0.12 |   |  |
| BP | 0051 histamine transport                                                | 1/292 | 233 | 277  | 481  | 1 |  |
|    | 608                                                                     |       | 28  | 564  | 145  |   |  |
|    | GO:                                                                     |       | 20/ | 0.22 | 0.12 |   |  |
| BP | 0072 nephron tubule formation                                           | 1/292 | 233 | 277  | 481  | 1 |  |
|    | 079                                                                     |       | 28  | 564  | 145  |   |  |
|    | GO:                                                                     |       | 20/ | 0.22 | 0.12 |   |  |
| BP | 0090 regulation of steroid hormone biosynthetic process                 | 1/292 | 233 | 277  | 481  | 1 |  |
|    | 030                                                                     |       | 28  | 564  | 145  |   |  |
|    | GO:                                                                     |       | 20/ | 0.22 | 0.12 |   |  |
| BP | 0140 signaling receptor ligand precursor processing                     | 1/292 | 233 | 277  | 481  | 1 |  |
|    | 448                                                                     |       | 28  | 564  | 145  |   |  |
|    | GO:                                                                     |       | 20/ | 0.22 | 0.12 |   |  |
| BP | 1900 regulation of vascular endothelial growth factor signaling pathway | 1/292 | 233 | 277  | 481  | 1 |  |
|    | 746                                                                     |       | 28  | 564  | 145  |   |  |
|    | GO:                                                                     |       | 20/ | 0.22 | 0.12 |   |  |
| BP | 1903 regulation of receptor clustering                                  | 1/292 | 233 | 277  | 481  | 1 |  |
|    | 909                                                                     |       | 28  | 564  | 145  |   |  |
|    | GO:                                                                     |       | 20/ | 0.22 | 0.12 |   |  |
| BP | 1905 regulation of membrane invagination                                | 1/292 | 233 | 277  | 481  | 1 |  |
|    | 153                                                                     |       | 28  | 564  | 145  |   |  |
|    | GO:                                                                     |       | 130 | 0.22 | 0.12 |   |  |
| BP | 0042 negative regulation of protein catabolic process                   | 3/292 | /23 | 280  | 481  | 3 |  |
|    | 177                                                                     |       | 328 | 232  | 145  |   |  |
|    | GO:                                                                     |       | 71/ | 0.22 | 0.12 |   |  |
| BP | 0006 fatty acid beta-oxidation                                          | 2/292 | 233 | 305  | 491  | 2 |  |
|    | 635                                                                     |       | 28  | 983  | 778  |   |  |
|    | GO:                                                                     |       | 193 | 0.22 | 0.12 |   |  |
| BP | 1903 regulation of regulated secretory pathway                          | 4/292 | /23 | 328  | 500  | 4 |  |
|    | 305                                                                     |       | 328 | 561  | 628  |   |  |
|    | GO:                                                                     |       | 260 | 0.22 | 0.12 |   |  |
| BP | 0051 negative regulation of transferase activity                        | 5/292 | /23 | 752  | 734  | 5 |  |
|    | 348                                                                     |       | 328 | 44   | 073  |   |  |



|    |                                                                                |       |     |      |      |   |
|----|--------------------------------------------------------------------------------|-------|-----|------|------|---|
|    | GO:                                                                            |       | 72/ | 0.22 | 0.12 |   |
| BP | 0051 regulation of intracellular pH                                            | 2/292 | 233 | 767  | 734  | 2 |
|    | 453                                                                            |       | 28  | 201  | 61   |   |
|    | GO:                                                                            |       | 72/ | 0.22 | 0.12 |   |
| BP | 1904 cranial skeletal system development                                       | 2/292 | 233 | 767  | 734  | 2 |
|    | 888                                                                            |       | 28  | 201  | 61   |   |
|    | GO:                                                                            |       | 195 | 0.22 | 0.12 |   |
| BP | 1905 regulation of protein localization to membrane                            | 4/292 | /23 | 859  | 782  | 4 |
|    | 475                                                                            |       | 328 | 656  | 449  |   |
|    | GO:                                                                            |       | 396 | 0.22 | 0.12 |   |
| BP | 0072 purine-containing compound metabolic process                              | 7/292 | /23 | 924  | 814  | 7 |
|    | 521                                                                            |       | 328 | 542  | 848  |   |
|    | GO:                                                                            |       | 261 | 0.22 | 0.12 |   |
| BP | 0045 regulated exocytosis                                                      | 5/292 | /23 | 980  | 842  | 5 |
|    | 055                                                                            |       | 328 | 553  | 268  |   |
|    | GO:                                                                            |       | 73/ | 0.23 | 0.12 |   |
| BP | 0002 regulation of receptor internalization                                    | 2/292 | 233 | 229  | 899  | 2 |
|    | 090                                                                            |       | 28  | 083  | 789  |   |
|    | GO:                                                                            |       | 73/ | 0.23 | 0.12 |   |
| BP | 0007 visual behavior                                                           | 2/292 | 233 | 229  | 899  | 2 |
|    | 632                                                                            |       | 28  | 083  | 789  |   |
|    | GO:                                                                            |       | 73/ | 0.23 | 0.12 |   |
| BP | 0009 cell-cell recognition                                                     | 2/292 | 233 | 229  | 899  | 2 |
|    | 988                                                                            |       | 28  | 083  | 789  |   |
|    | GO:                                                                            |       | 21/ | 0.23 | 0.12 |   |
| BP | 0001 cartilage condensation                                                    | 1/292 | 233 | 251  | 899  | 1 |
|    | 502                                                                            |       | 28  | 262  | 789  |   |
|    | GO:                                                                            |       | 21/ | 0.23 | 0.12 |   |
| BP | 0002 antigen processing and presentation of peptide antigen via MHC class II   | 1/292 | 233 | 251  | 899  | 1 |
|    | 495                                                                            |       | 28  | 262  | 789  |   |
|    | GO:                                                                            |       | 21/ | 0.23 | 0.12 |   |
| BP | 0007 vacuolar acidification                                                    | 1/292 | 233 | 251  | 899  | 1 |
|    | 035                                                                            |       | 28  | 262  | 789  |   |
|    | GO:                                                                            |       | 21/ | 0.23 | 0.12 |   |
| BP | 0007 grooming behavior                                                         | 1/292 | 233 | 251  | 899  | 1 |
|    | 625                                                                            |       | 28  | 262  | 789  |   |
|    | GO:                                                                            |       | 21/ | 0.23 | 0.12 |   |
| BP | 0014 response to amine                                                         | 1/292 | 233 | 251  | 899  | 1 |
|    | 075                                                                            |       | 28  | 262  | 789  |   |
|    | GO:                                                                            |       | 21/ | 0.23 | 0.12 |   |
| BP | 0014 release of sequestered calcium ion into cytosol by sarcoplasmic reticulum | 1/292 | 233 | 251  | 899  | 1 |
|    | 808                                                                            |       | 28  | 262  | 789  |   |

|    |                                                                                         |       |     |      |      |   |
|----|-----------------------------------------------------------------------------------------|-------|-----|------|------|---|
|    | GO:                                                                                     |       | 21/ | 0.23 | 0.12 |   |
| BP | 0019 removal of superoxide radicals                                                     | 1/292 | 233 | 251  | 899  | 1 |
|    | 430                                                                                     |       | 28  | 262  | 789  |   |
|    | GO:                                                                                     |       | 21/ | 0.23 | 0.12 |   |
| BP | 0031 positive regulation of histone deacetylation                                       | 1/292 | 233 | 251  | 899  | 1 |
|    | 065                                                                                     |       | 28  | 262  | 789  |   |
|    | GO:                                                                                     |       | 21/ | 0.23 | 0.12 |   |
| BP | 0031 retinal ganglion cell axon guidance                                                | 1/292 | 233 | 251  | 899  | 1 |
|    | 290                                                                                     |       | 28  | 262  | 789  |   |
|    | GO:                                                                                     |       | 21/ | 0.23 | 0.12 |   |
| BP | 0032 positive regulation of chondrocyte differentiation                                 | 1/292 | 233 | 251  | 899  | 1 |
|    | 332                                                                                     |       | 28  | 262  | 789  |   |
|    | GO:                                                                                     |       | 21/ | 0.23 | 0.12 |   |
| BP | 0033 positive regulation of catecholamine secretion                                     | 1/292 | 233 | 251  | 899  | 1 |
|    | 605                                                                                     |       | 28  | 262  | 789  |   |
|    | GO:                                                                                     |       | 21/ | 0.23 | 0.12 |   |
| BP | 0035 establishment of apical/basal cell polarity                                        | 1/292 | 233 | 251  | 899  | 1 |
|    | 089                                                                                     |       | 28  | 262  | 789  |   |
|    | GO:                                                                                     |       | 21/ | 0.23 | 0.12 |   |
| BP | 0035 peroxisome proliferator activated receptor signaling pathway                       | 1/292 | 233 | 251  | 899  | 1 |
|    | 357                                                                                     |       | 28  | 262  | 789  |   |
|    | GO:                                                                                     |       | 21/ | 0.23 | 0.12 |   |
| BP | 0042 regulation of dopamine metabolic process                                           | 1/292 | 233 | 251  | 899  | 1 |
|    | 053                                                                                     |       | 28  | 262  | 789  |   |
|    | GO:                                                                                     |       | 21/ | 0.23 | 0.12 |   |
| BP | 0043 ossification involved in bone maturation                                           | 1/292 | 233 | 251  | 899  | 1 |
|    | 931                                                                                     |       | 28  | 262  | 789  |   |
|    | GO:                                                                                     |       | 21/ | 0.23 | 0.12 |   |
| BP | 0045 positive regulation of translational initiation                                    | 1/292 | 233 | 251  | 899  | 1 |
|    | 948                                                                                     |       | 28  | 262  | 789  |   |
|    | GO:                                                                                     |       | 21/ | 0.23 | 0.12 |   |
| BP | 0046 polyol catabolic process                                                           | 1/292 | 233 | 251  | 899  | 1 |
|    | 174                                                                                     |       | 28  | 262  | 789  |   |
|    | GO:                                                                                     |       | 21/ | 0.23 | 0.12 |   |
| BP | 0048 post-embryonic animal organ development                                            | 1/292 | 233 | 251  | 899  | 1 |
|    | 569                                                                                     |       | 28  | 262  | 789  |   |
|    | GO:                                                                                     |       | 21/ | 0.23 | 0.12 |   |
| BP | 0051 regulation of mitochondrial depolarization                                         | 1/292 | 233 | 251  | 899  | 1 |
|    | 900                                                                                     |       | 28  | 262  | 789  |   |
|    | GO:                                                                                     |       | 21/ | 0.23 | 0.12 |   |
| BP | 1902 negative regulation of intrinsic apoptotic signaling pathway by p53 class mediator | 1/292 | 233 | 251  | 899  | 1 |
|    | 254                                                                                     |       | 28  | 262  | 789  |   |

|    |      |                                           |       |      |      |      |
|----|------|-------------------------------------------|-------|------|------|------|
|    | GO:  |                                           | 21/   | 0.23 | 0.12 |      |
| BP | 1903 | positive regulation of oxidative stress-  | 1/292 | 233  | 251  | 899  |
|    | 209  | induced cell death                        |       | 28   | 262  | 789  |
|    | GO:  |                                           | 134   | 0.23 | 0.13 |      |
| BP | 0046 | regulation of neurotransmitter secretion  | 3/292 | /23  | 599  | 089  |
|    | 928  |                                           |       | 328  | 99   | 328  |
|    | GO:  |                                           | 74/   | 0.23 | 0.13 |      |
| BP | 0009 | aerobic respiration                       | 2/292 | 233  | 691  | 132  |
|    | 060  |                                           |       | 28   | 54   | 21   |
|    | GO:  |                                           | 74/   | 0.23 | 0.13 |      |
| BP | 2001 | negative regulation of response to DNA    | 2/292 | 233  | 691  | 132  |
|    | 021  | damage stimulus                           |       | 28   | 54   | 21   |
|    | GO:  |                                           | 401   | 0.23 | 0.13 |      |
| BP | 0009 | response to radiation                     | 7/292 | /23  | 846  | 214  |
|    | 314  |                                           |       | 328  | 608  | 195  |
|    | GO:  |                                           | 135   | 0.23 | 0.13 |      |
| BP | 0043 | regulation of generation of precursor     | 3/292 | /23  | 932  | 253  |
|    | 467  | metabolites and energy                    |       | 328  | 092  | 604  |
|    | GO:  |                                           | 135   | 0.23 | 0.13 |      |
| BP | 0072 | signal transduction by p53 class mediator | 3/292 | /23  | 932  | 253  |
|    | 331  |                                           |       | 328  | 092  | 604  |
|    | GO:  |                                           | 75/   | 0.24 | 0.13 |      |
| BP | 0009 | nucleoside metabolic process              | 2/292 | 233  | 154  | 317  |
|    | 116  |                                           |       | 28   | 486  | 137  |
|    | GO:  |                                           | 334   | 0.24 | 0.13 |      |
| BP | 0009 | ribonucleotide metabolic process          | 6/292 | /23  | 188  | 317  |
|    | 259  |                                           |       | 328  | 456  | 137  |
|    | GO:  |                                           | 200   | 0.24 | 0.13 |      |
| BP | 0099 | postsynapse organization                  | 4/292 | /23  | 200  | 317  |
|    | 173  |                                           |       | 328  | 935  | 137  |
|    | GO:  | antigen processing and presentation of    |       | 22/  | 0.24 | 0.13 |
| BP | 0002 | peptide or polysaccharide antigen via MHC | 1/292 | 233  | 212  | 317  |
|    | 504  | class II                                  |       | 28   | 803  | 137  |
|    | GO:  |                                           | 22/   | 0.24 | 0.13 |      |
| BP | 0006 | mitochondrial electron transport, NADH to | 1/292 | 233  | 212  | 317  |
|    | 120  | ubiquinone                                |       | 28   | 803  | 137  |
|    | GO:  |                                           | 22/   | 0.24 | 0.13 |      |
| BP | 0006 | glycoprotein catabolic process            | 1/292 | 233  | 212  | 317  |
|    | 516  |                                           |       | 28   | 803  | 137  |
|    | GO:  |                                           | 22/   | 0.24 | 0.13 |      |
| BP | 0007 | male meiosis I                            | 1/292 | 233  | 212  | 317  |
|    | 141  |                                           |       | 28   | 803  | 137  |

|    |                                                                                |       |     |      |      |   |
|----|--------------------------------------------------------------------------------|-------|-----|------|------|---|
|    | GO:                                                                            |       | 22/ | 0.24 | 0.13 |   |
| BP | 0008 asymmetric cell division                                                  | 1/292 | 233 | 212  | 317  | 1 |
|    | 356                                                                            |       | 28  | 803  | 137  |   |
|    | GO:                                                                            |       | 22/ | 0.24 | 0.13 |   |
| BP | 0014 response to muscle activity                                               | 1/292 | 233 | 212  | 317  | 1 |
|    | 850                                                                            |       | 28  | 803  | 137  |   |
|    | GO:                                                                            |       | 22/ | 0.24 | 0.13 |   |
| BP | 0014 negative regulation of smooth muscle cell migration                       | 1/292 | 233 | 212  | 317  | 1 |
|    | 912                                                                            |       | 28  | 803  | 137  |   |
|    | GO:                                                                            |       | 22/ | 0.24 | 0.13 |   |
| BP | 0015 L-glutamate transmembrane transport                                       | 1/292 | 233 | 212  | 317  | 1 |
|    | 813                                                                            |       | 28  | 803  | 137  |   |
|    | GO:                                                                            |       | 22/ | 0.24 | 0.13 |   |
| BP | 0019 hexose catabolic process                                                  | 1/292 | 233 | 212  | 317  | 1 |
|    | 320                                                                            |       | 28  | 803  | 137  |   |
|    | GO:                                                                            |       | 22/ | 0.24 | 0.13 |   |
| BP | 0021 dorsal spinal cord development                                            | 1/292 | 233 | 212  | 317  | 1 |
|    | 516                                                                            |       | 28  | 803  | 137  |   |
|    | GO:                                                                            |       | 22/ | 0.24 | 0.13 |   |
| BP | 0042 melanin biosynthetic process                                              | 1/292 | 233 | 212  | 317  | 1 |
|    | 438                                                                            |       | 28  | 803  | 137  |   |
|    | GO:                                                                            |       | 22/ | 0.24 | 0.13 |   |
| BP | 0046 negative regulation of viral entry into host cell                         | 1/292 | 233 | 212  | 317  | 1 |
|    | 597                                                                            |       | 28  | 803  | 137  |   |
|    | GO:                                                                            |       | 22/ | 0.24 | 0.13 |   |
| BP | 0048 neural nucleus development                                                | 1/292 | 233 | 212  | 317  | 1 |
|    | 857                                                                            |       | 28  | 803  | 137  |   |
|    | GO:                                                                            |       | 22/ | 0.24 | 0.13 |   |
| BP | 0051 cytoplasmic sequestering of protein                                       | 1/292 | 233 | 212  | 317  | 1 |
|    | 220                                                                            |       | 28  | 803  | 137  |   |
|    | GO:                                                                            |       | 22/ | 0.24 | 0.13 |   |
| BP | 0060 Sertoli cell development                                                  | 1/292 | 233 | 212  | 317  | 1 |
|    | 009                                                                            |       | 28  | 803  | 137  |   |
|    | GO:                                                                            |       | 22/ | 0.24 | 0.13 |   |
| BP | 0060 inhibitory postsynaptic potential                                         | 1/292 | 233 | 212  | 317  | 1 |
|    | 080                                                                            |       | 28  | 803  | 137  |   |
|    | GO:                                                                            |       | 22/ | 0.24 | 0.13 |   |
| BP | 0060 trachea development                                                       | 1/292 | 233 | 212  | 317  | 1 |
|    | 438                                                                            |       | 28  | 803  | 137  |   |
|    | GO: positive regulation of transcription from RNA                              |       | 22/ | 0.24 | 0.13 |   |
| BP | 1901 polymerase II promoter involved in cellular response to chemical stimulus | 1/292 | 233 | 212  | 317  | 1 |
|    | 522                                                                            |       | 28  | 803  | 137  |   |

|    |      |                                                                                |       |     |      |      |   |
|----|------|--------------------------------------------------------------------------------|-------|-----|------|------|---|
|    | GO:  |                                                                                |       | 22/ | 0.24 | 0.13 |   |
| BP | 1902 | regulation of cellular response to vascular endothelial growth factor stimulus | 1/292 | 233 | 212  | 317  | 1 |
|    | 547  |                                                                                |       | 28  | 803  | 137  |   |
|    | GO:  |                                                                                |       | 22/ | 0.24 | 0.13 |   |
| BP | 1903 | release of sequestered calcium ion into cytosol by endoplasmic reticulum       | 1/292 | 233 | 212  | 317  | 1 |
|    | 514  |                                                                                |       | 28  | 803  | 137  |   |
|    | GO:  |                                                                                |       | 136 | 0.24 | 0.13 |   |
| BP | 0001 | cilium or flagellum-dependent cell motility                                    | 3/292 | /23 | 264  | 337  | 3 |
|    | 539  |                                                                                |       | 328 | 988  | 887  |   |
|    | GO:  |                                                                                |       | 136 | 0.24 | 0.13 |   |
| BP | 0060 | cilium-dependent cell motility                                                 | 3/292 | /23 | 264  | 337  | 3 |
|    | 285  |                                                                                |       | 328 | 988  | 887  |   |
|    | GO:  |                                                                                |       | 76/ | 0.24 | 0.13 |   |
| BP | 1901 | alpha-amino acid catabolic process                                             | 2/292 | 233 | 617  | 527  | 2 |
|    | 606  |                                                                                |       | 28  | 836  | 81   |   |
|    | GO:  |                                                                                |       | 138 | 0.24 | 0.13 |   |
| BP | 0006 | acylglycerol metabolic process                                                 | 3/292 | /23 | 933  | 672  | 3 |
|    | 639  |                                                                                |       | 328 | 019  | 301  |   |
|    | GO:  |                                                                                |       | 138 | 0.24 | 0.13 |   |
| BP | 0009 | response to UV                                                                 | 3/292 | /23 | 933  | 672  | 3 |
|    | 411  |                                                                                |       | 328 | 019  | 301  |   |
|    | GO:  |                                                                                |       | 138 | 0.24 | 0.13 |   |
| BP | 0030 | erythrocyte differentiation                                                    | 3/292 | /23 | 933  | 672  | 3 |
|    | 218  |                                                                                |       | 328 | 019  | 301  |   |
|    | GO:  |                                                                                |       | 138 | 0.24 | 0.13 |   |
| BP | 0035 | regulation of Rho protein signal transduction                                  | 3/292 | /23 | 933  | 672  | 3 |
|    | 023  |                                                                                |       | 328 | 019  | 301  |   |
|    | GO:  |                                                                                |       | 77/ | 0.25 | 0.13 |   |
| BP | 0001 | somitogenesis                                                                  | 2/292 | 233 | 081  | 672  | 2 |
|    | 756  |                                                                                |       | 28  | 509  | 301  |   |
|    | GO:  |                                                                                |       | 77/ | 0.25 | 0.13 |   |
| BP | 0010 | positive regulation of mitochondrion organization                              | 2/292 | 233 | 081  | 672  | 2 |
|    | 822  |                                                                                |       | 28  | 509  | 301  |   |
|    | GO:  |                                                                                |       | 77/ | 0.25 | 0.13 |   |
| BP | 0031 | negative regulation of protein ubiquitination                                  | 2/292 | 233 | 081  | 672  | 2 |
|    | 397  |                                                                                |       | 28  | 509  | 301  |   |
|    | GO:  |                                                                                |       | 77/ | 0.25 | 0.13 |   |
| BP | 0032 | negative regulation of transporter activity                                    | 2/292 | 233 | 081  | 672  | 2 |
|    | 410  |                                                                                |       | 28  | 509  | 301  |   |
|    | GO:  |                                                                                |       | 77/ | 0.25 | 0.13 |   |
| BP | 0033 | regulation of intracellular steroid hormone receptor signaling pathway         | 2/292 | 233 | 081  | 672  | 2 |
|    | 143  |                                                                                |       | 28  | 509  | 301  |   |

|    |      |                                                               |       |      |      |       |
|----|------|---------------------------------------------------------------|-------|------|------|-------|
|    | GO:  |                                                               | 77/   | 0.25 | 0.13 |       |
| BP | 0048 | artery morphogenesis                                          | 2/292 | 233  | 081  | 672 2 |
|    |      | 844                                                           |       | 28   | 509  | 301   |
|    | GO:  |                                                               |       | 23/  | 0.25 | 0.13  |
| BP | 0006 | pinocytosis                                                   | 1/292 | 233  | 162  | 672 1 |
|    |      | 907                                                           |       | 28   | 338  | 301   |
|    | GO:  |                                                               |       | 23/  | 0.25 | 0.13  |
| BP | 0009 | glutamine family amino acid catabolic process                 | 1/292 | 233  | 162  | 672 1 |
|    |      | 065                                                           |       | 28   | 338  | 301   |
|    | GO:  |                                                               |       | 23/  | 0.25 | 0.13  |
| BP | 0010 | regulation of triglyceride biosynthetic process               | 1/292 | 233  | 162  | 672 1 |
|    |      | 866                                                           |       | 28   | 338  | 301   |
|    | GO:  |                                                               |       | 23/  | 0.25 | 0.13  |
| BP | 0010 | response to auditory stimulus                                 | 1/292 | 233  | 162  | 672 1 |
|    |      | 996                                                           |       | 28   | 338  | 301   |
|    | GO:  |                                                               |       | 23/  | 0.25 | 0.13  |
| BP | 0021 | cerebellar Purkinje cell layer morphogenesis                  | 1/292 | 233  | 162  | 672 1 |
|    |      | 692                                                           |       | 28   | 338  | 301   |
|    | GO:  |                                                               |       | 23/  | 0.25 | 0.13  |
| BP | 0023 | signal transduction involved in regulation of gene expression | 1/292 | 233  | 162  | 672 1 |
|    |      | 019                                                           |       | 28   | 338  | 301   |
|    | GO:  |                                                               |       | 23/  | 0.25 | 0.13  |
| BP | 0030 | male genitalia development                                    | 1/292 | 233  | 162  | 672 1 |
|    |      | 539                                                           |       | 28   | 338  | 301   |
|    | GO:  |                                                               |       | 23/  | 0.25 | 0.13  |
| BP | 0032 | negative regulation of chondrocyte differentiation            | 1/292 | 233  | 162  | 672 1 |
|    |      | 331                                                           |       | 28   | 338  | 301   |
|    | GO:  |                                                               |       | 23/  | 0.25 | 0.13  |
| BP | 0034 | low-density lipoprotein particle clearance                    | 1/292 | 233  | 162  | 672 1 |
|    |      | 383                                                           |       | 28   | 338  | 301   |
|    | GO:  |                                                               |       | 23/  | 0.25 | 0.13  |
| BP | 0034 | response to fluid shear stress                                | 1/292 | 233  | 162  | 672 1 |
|    |      | 405                                                           |       | 28   | 338  | 301   |
|    | GO:  |                                                               |       | 23/  | 0.25 | 0.13  |
| BP | 0039 | RIG-I signaling pathway                                       | 1/292 | 233  | 162  | 672 1 |
|    |      | 529                                                           |       | 28   | 338  | 301   |
|    | GO:  |                                                               |       | 23/  | 0.25 | 0.13  |
| BP | 0042 | regulation of catecholamine metabolic process                 | 1/292 | 233  | 162  | 672 1 |
|    |      | 069                                                           |       | 28   | 338  | 301   |
|    | GO:  |                                                               |       | 23/  | 0.25 | 0.13  |
| BP | 0042 | benzene-containing compound metabolic process                 | 1/292 | 233  | 162  | 672 1 |
|    |      | 537                                                           |       | 28   | 338  | 301   |

|    |                                                            |       |     |      |      |   |
|----|------------------------------------------------------------|-------|-----|------|------|---|
|    | GO:                                                        |       | 23/ | 0.25 | 0.13 |   |
| BP | 0043 skeletal muscle adaptation                            | 1/292 | 233 | 162  | 672  | 1 |
|    | 501                                                        |       | 28  | 338  | 301  |   |
|    | GO:                                                        |       | 23/ | 0.25 | 0.13 |   |
| BP | 0043 regulation of respiratory gaseous exchange            | 1/292 | 233 | 162  | 672  | 1 |
|    | 576                                                        |       | 28  | 338  | 301  |   |
|    | GO:                                                        |       | 23/ | 0.25 | 0.13 |   |
| BP | 0045 plasma membrane fusion                                | 1/292 | 233 | 162  | 672  | 1 |
|    | 026                                                        |       | 28  | 338  | 301  |   |
|    | GO:                                                        |       | 23/ | 0.25 | 0.13 |   |
| BP | 0045 transcytosis                                          | 1/292 | 233 | 162  | 672  | 1 |
|    | 056                                                        |       | 28  | 338  | 301  |   |
|    | GO:                                                        |       | 23/ | 0.25 | 0.13 |   |
| BP | 0045 positive regulation of epidermal cell differentiation | 1/292 | 233 | 162  | 672  | 1 |
|    | 606                                                        |       | 28  | 338  | 301  |   |
|    | GO:                                                        |       | 23/ | 0.25 | 0.13 |   |
| BP | 0051 myoblast proliferation                                | 1/292 | 233 | 162  | 672  | 1 |
|    | 450                                                        |       | 28  | 338  | 301  |   |
|    | GO:                                                        |       | 23/ | 0.25 | 0.13 |   |
| BP | 0061 establishment of monopolar cell polarity              | 1/292 | 233 | 162  | 672  | 1 |
|    | 162                                                        |       | 28  | 338  | 301  |   |
|    | GO:                                                        |       | 23/ | 0.25 | 0.13 |   |
| BP | 0070 bone maturation                                       | 1/292 | 233 | 162  | 672  | 1 |
|    | 977                                                        |       | 28  | 338  | 301  |   |
|    | GO:                                                        |       | 23/ | 0.25 | 0.13 |   |
| BP | 0071 cellular response to oxygen radical                   | 1/292 | 233 | 162  | 672  | 1 |
|    | 450                                                        |       | 28  | 338  | 301  |   |
|    | GO:                                                        |       | 23/ | 0.25 | 0.13 |   |
| BP | 0071 cellular response to superoxide                       | 1/292 | 233 | 162  | 672  | 1 |
|    | 451                                                        |       | 28  | 338  | 301  |   |
|    | GO:                                                        |       | 23/ | 0.25 | 0.13 |   |
| BP | 0097 dendritic spine maintenance                           | 1/292 | 233 | 162  | 672  | 1 |
|    | 062                                                        |       | 28  | 338  | 301  |   |
|    | GO:                                                        |       | 23/ | 0.25 | 0.13 |   |
| BP | 0098 calcium ion import across plasma membrane             | 1/292 | 233 | 162  | 672  | 1 |
|    | 703                                                        |       | 28  | 338  | 301  |   |
|    | GO:                                                        |       | 23/ | 0.25 | 0.13 |   |
| BP | 1903 negative regulation of regulated secretory pathway    | 1/292 | 233 | 162  | 672  | 1 |
|    | 306                                                        |       | 28  | 338  | 301  |   |
|    | GO:                                                        |       | 23/ | 0.25 | 0.13 |   |
| BP | 2000 regulation of T-helper 17 type immune response        | 1/292 | 233 | 162  | 672  | 1 |
|    | 316                                                        |       | 28  | 338  | 301  |   |

|    |      |                                                                                     |       |      |      |      |
|----|------|-------------------------------------------------------------------------------------|-------|------|------|------|
|    | GO:  |                                                                                     | 23/   | 0.25 | 0.13 |      |
| BP | 2000 | regulation of bicellular tight junction assembly                                    | 1/292 | 233  | 162  | 672  |
|    | 810  |                                                                                     |       | 28   | 338  | 301  |
|    | GO:  |                                                                                     |       | 139  | 0.25 | 0.13 |
| BP | 1903 | positive regulation of protein modification by small protein conjugation or removal | 3/292 | /23  | 268  | 725  |
|    | 322  |                                                                                     |       | 328  | 086  | 719  |
|    | GO:  |                                                                                     |       | 78/  | 0.25 | 0.13 |
| BP | 0005 | glycogen metabolic process                                                          | 2/292 | 233  | 545  | 855  |
|    | 977  |                                                                                     |       | 28   | 423  | 975  |
|    | GO:  |                                                                                     |       | 78/  | 0.25 | 0.13 |
| BP | 0006 | cellular glucan metabolic process                                                   | 2/292 | 233  | 545  | 855  |
|    | 073  |                                                                                     |       | 28   | 423  | 975  |
|    | GO:  |                                                                                     |       | 78/  | 0.25 | 0.13 |
| BP | 0044 | glucan metabolic process                                                            | 2/292 | 233  | 545  | 855  |
|    | 042  |                                                                                     |       | 28   | 423  | 975  |
|    | GO:  |                                                                                     |       | 78/  | 0.25 | 0.13 |
| BP | 0046 | viral entry into host cell                                                          | 2/292 | 233  | 545  | 855  |
|    | 718  |                                                                                     |       | 28   | 423  | 975  |
|    | GO:  |                                                                                     |       | 78/  | 0.25 | 0.13 |
| BP | 1901 | regulation of protein acetylation                                                   | 2/292 | 233  | 545  | 855  |
|    | 983  |                                                                                     |       | 28   | 423  | 975  |
|    | GO:  |                                                                                     |       | 205  | 0.25 | 0.13 |
| BP | 0016 | macroautophagy                                                                      | 4/292 | /23  | 559  | 859  |
|    | 236  |                                                                                     |       | 328  | 656  | 621  |
|    | GO:  |                                                                                     |       | 140  | 0.25 | 0.13 |
| BP | 0006 | neutral lipid metabolic process                                                     | 3/292 | /23  | 603  | 867  |
|    | 638  |                                                                                     |       | 328  | 807  | 262  |
|    | GO:  |                                                                                     |       | 140  | 0.25 | 0.13 |
| BP | 0050 | neuromuscular process                                                               | 3/292 | /23  | 603  | 867  |
|    | 905  |                                                                                     |       | 328  | 807  | 262  |
|    | GO:  |                                                                                     |       | 140  | 0.25 | 0.13 |
| BP | 0071 | cellular response to oxygen levels                                                  | 3/292 | /23  | 603  | 867  |
|    | 453  |                                                                                     |       | 328  | 807  | 262  |
|    | GO:  |                                                                                     |       | 140  | 0.25 | 0.13 |
| BP | 1904 | regulation of protein localization to cell periphery                                | 3/292 | /23  | 603  | 867  |
|    | 375  |                                                                                     |       | 328  | 807  | 262  |
|    | GO:  |                                                                                     |       | 274  | 0.26 | 0.14 |
| BP | 0010 | response to metal ion                                                               | 5/292 | /23  | 002  | 020  |
|    | 038  |                                                                                     |       | 328  | 51   | 725  |
|    | GO:  |                                                                                     |       | 79/  | 0.26 | 0.14 |
| BP | 0045 | response to ethanol                                                                 | 2/292 | 233  | 009  | 020  |
|    | 471  |                                                                                     |       | 28   | 5    | 725  |



|    |      |                                                                                  |       |      |      |     |   |
|----|------|----------------------------------------------------------------------------------|-------|------|------|-----|---|
|    | GO:  |                                                                                  | 24/   | 0.26 | 0.14 |     |   |
| BP | 0002 | negative regulation of B cell apoptotic process                                  | 1/292 | 233  | 100  | 020 | 1 |
|    | 903  |                                                                                  |       | 28   | 016  | 725 |   |
|    | GO:  |                                                                                  | 24/   | 0.26 | 0.14 |     |   |
| BP | 0006 | melanin metabolic process                                                        | 1/292 | 233  | 100  | 020 | 1 |
|    | 582  |                                                                                  |       | 28   | 016  | 725 |   |
|    | GO:  |                                                                                  | 24/   | 0.26 | 0.14 |     |   |
| BP | 0021 | subpallium development                                                           | 1/292 | 233  | 100  | 020 | 1 |
|    | 544  |                                                                                  |       | 28   | 016  | 725 |   |
|    | GO:  |                                                                                  | 24/   | 0.26 | 0.14 |     |   |
| BP | 0022 | cell cycle phase                                                                 | 1/292 | 233  | 100  | 020 | 1 |
|    | 403  |                                                                                  |       | 28   | 016  | 725 |   |
|    | GO:  |                                                                                  | 24/   | 0.26 | 0.14 |     |   |
| BP | 0030 | polarized epithelial cell differentiation                                        | 1/292 | 233  | 100  | 020 | 1 |
|    | 859  |                                                                                  |       | 28   | 016  | 725 |   |
|    | GO:  |                                                                                  | 24/   | 0.26 | 0.14 |     |   |
| BP | 0030 | notochord development                                                            | 1/292 | 233  | 100  | 020 | 1 |
|    | 903  |                                                                                  |       | 28   | 016  | 725 |   |
|    | GO:  |                                                                                  | 24/   | 0.26 | 0.14 |     |   |
| BP | 0031 | cellular response to nutrient                                                    | 1/292 | 233  | 100  | 020 | 1 |
|    | 670  |                                                                                  |       | 28   | 016  | 725 |   |
|    | GO:  |                                                                                  | 24/   | 0.26 | 0.14 |     |   |
| BP | 0032 | negative regulation of interleukin-1 beta production                             | 1/292 | 233  | 100  | 020 | 1 |
|    | 691  |                                                                                  |       | 28   | 016  | 725 |   |
|    | GO:  |                                                                                  | 24/   | 0.26 | 0.14 |     |   |
| BP | 0035 | response to interferon-alpha                                                     | 1/292 | 233  | 100  | 020 | 1 |
|    | 455  |                                                                                  |       | 28   | 016  | 725 |   |
|    | GO:  |                                                                                  | 24/   | 0.26 | 0.14 |     |   |
| BP | 0042 | middle ear morphogenesis                                                         | 1/292 | 233  | 100  | 020 | 1 |
|    | 474  |                                                                                  |       | 28   | 016  | 725 |   |
|    | GO:  |                                                                                  | 24/   | 0.26 | 0.14 |     |   |
| BP | 0043 | tongue development                                                               | 1/292 | 233  | 100  | 020 | 1 |
|    | 586  |                                                                                  |       | 28   | 016  | 725 |   |
|    | GO:  |                                                                                  | 24/   | 0.26 | 0.14 |     |   |
| BP | 0044 | cell-cell adhesion mediated by cadherin                                          | 1/292 | 233  | 100  | 020 | 1 |
|    | 331  |                                                                                  |       | 28   | 016  | 725 |   |
|    | GO:  |                                                                                  | 24/   | 0.26 | 0.14 |     |   |
| BP | 0044 | secondary metabolite biosynthetic process                                        | 1/292 | 233  | 100  | 020 | 1 |
|    | 550  |                                                                                  |       | 28   | 016  | 725 |   |
|    | GO:  |                                                                                  | 24/   | 0.26 | 0.14 |     |   |
| BP | 0045 | negative regulation of cyclin-dependent protein serine/threonine kinase activity | 1/292 | 233  | 100  | 020 | 1 |
|    | 736  |                                                                                  |       | 28   | 016  | 725 |   |

|    |      |                                                                |       |     |      |      |   |
|----|------|----------------------------------------------------------------|-------|-----|------|------|---|
|    | GO:  |                                                                |       | 24/ | 0.26 | 0.14 |   |
| BP | 0046 | negative regulation of nucleocytoplasmic transport             | 1/292 | 233 | 100  | 020  | 1 |
|    | 823  |                                                                |       | 28  | 016  | 725  |   |
|    | GO:  |                                                                |       | 24/ | 0.26 | 0.14 |   |
| BP | 0051 | mitochondrial depolarization                                   | 1/292 | 233 | 100  | 020  | 1 |
|    | 882  |                                                                |       | 28  | 016  | 725  |   |
|    | GO:  |                                                                |       | 24/ | 0.26 | 0.14 |   |
| BP | 0061 | establishment or maintenance of monopolar cell polarity        | 1/292 | 233 | 100  | 020  | 1 |
|    | 339  |                                                                |       | 28  | 016  | 725  |   |
|    | GO:  |                                                                |       | 24/ | 0.26 | 0.14 |   |
| BP | 0070 | inclusion body assembly                                        | 1/292 | 233 | 100  | 020  | 1 |
|    | 841  |                                                                |       | 28  | 016  | 725  |   |
|    | GO:  |                                                                |       | 24/ | 0.26 | 0.14 |   |
| BP | 0071 | cellular response to estradiol stimulus                        | 1/292 | 233 | 100  | 020  | 1 |
|    | 392  |                                                                |       | 28  | 016  | 725  |   |
|    | GO:  |                                                                |       | 24/ | 0.26 | 0.14 |   |
| BP | 0072 | pyridine-containing compound biosynthetic process              | 1/292 | 233 | 100  | 020  | 1 |
|    | 525  |                                                                |       | 28  | 016  | 725  |   |
|    | GO:  |                                                                |       | 24/ | 0.26 | 0.14 |   |
| BP | 0090 | regulation of platelet aggregation                             | 1/292 | 233 | 100  | 020  | 1 |
|    | 330  |                                                                |       | 28  | 016  | 725  |   |
|    | GO:  |                                                                |       | 24/ | 0.26 | 0.14 |   |
| BP | 0097 | neuronal stem cell population maintenance                      | 1/292 | 233 | 100  | 020  | 1 |
|    | 150  |                                                                |       | 28  | 016  | 725  |   |
|    | GO:  |                                                                |       | 24/ | 0.26 | 0.14 |   |
| BP | 0098 | cellular oxidant detoxification                                | 1/292 | 233 | 100  | 020  | 1 |
|    | 869  |                                                                |       | 28  | 016  | 725  |   |
|    | GO:  |                                                                |       | 24/ | 0.26 | 0.14 |   |
| BP | 1900 | positive regulation of cellular response to oxidative stress   | 1/292 | 233 | 100  | 020  | 1 |
|    | 409  |                                                                |       | 28  | 016  | 725  |   |
|    | GO:  |                                                                |       | 24/ | 0.26 | 0.14 |   |
| BP | 1902 | calcium ion import into cytosol                                | 1/292 | 233 | 100  | 020  | 1 |
|    | 656  |                                                                |       | 28  | 016  | 725  |   |
|    | GO:  |                                                                |       | 24/ | 0.26 | 0.14 |   |
| BP | 1903 | negative regulation of protein localization to plasma membrane | 1/292 | 233 | 100  | 020  | 1 |
|    | 077  |                                                                |       | 28  | 016  | 725  |   |
|    | GO:  |                                                                |       | 207 | 0.26 | 0.14 |   |
| BP | 0001 | response to acid chemical                                      | 4/292 | /23 | 107  | 020  | 4 |
|    | 101  |                                                                |       | 328 | 502  | 725  |   |
|    | GO:  |                                                                |       | 142 | 0.26 | 0.14 |   |
| BP | 0010 | regulation of mitochondrion organization                       | 3/292 | /23 | 277  | 099  | 3 |
|    | 821  |                                                                |       | 328 | 077  | 483  |   |

|    |                                                        |       |     |      |      |   |
|----|--------------------------------------------------------|-------|-----|------|------|---|
|    | GO:                                                    |       | 142 | 0.26 | 0.14 |   |
| BP | 0016 carbohydrate catabolic process                    | 3/292 | /23 | 277  | 099  | 3 |
|    | 052                                                    |       | 328 | 077  | 483  |   |
|    | GO:                                                    |       | 142 | 0.26 | 0.14 |   |
| BP | 1902 microtubule cytoskeleton organization             | 3/292 | /23 | 277  | 099  | 3 |
|    | 850 involved in mitosis                                |       | 328 | 077  | 483  |   |
|    | GO:                                                    |       | 80/ | 0.26 | 0.14 |   |
| BP | 0010 negative regulation of phosphatase activity       | 2/292 | 233 | 473  | 180  | 2 |
|    | 923                                                    |       | 28  | 664  | 052  |   |
|    | GO:                                                    |       | 80/ | 0.26 | 0.14 |   |
| BP | 0030 regulation of cellular pH                         | 2/292 | 233 | 473  | 180  | 2 |
|    | 641                                                    |       | 28  | 664  | 052  |   |
|    | GO:                                                    |       | 80/ | 0.26 | 0.14 |   |
| BP | 0032 regulation of cytokinesis                         | 2/292 | 233 | 473  | 180  | 2 |
|    | 465                                                    |       | 28  | 664  | 052  |   |
|    | GO:                                                    |       | 80/ | 0.26 | 0.14 |   |
| BP | 0048 focal adhesion assembly                           | 2/292 | 233 | 473  | 180  | 2 |
|    | 041                                                    |       | 28  | 664  | 052  |   |
|    | GO:                                                    |       | 80/ | 0.26 | 0.14 |   |
| BP | 0051 positive regulation of synapse assembly           | 2/292 | 233 | 473  | 180  | 2 |
|    | 965                                                    |       | 28  | 664  | 052  |   |
|    | GO:                                                    |       | 80/ | 0.26 | 0.14 |   |
| BP | 1900 regulation of purine nucleotide metabolic process | 2/292 | 233 | 473  | 180  | 2 |
|    | 542                                                    |       | 28  | 664  | 052  |   |
|    | GO:                                                    |       | 345 | 0.26 | 0.14 |   |
| BP | 0019 ribose phosphate metabolic process                | 6/292 | /23 | 481  | 180  | 6 |
|    | 693                                                    |       | 328 | 025  | 052  |   |
|    | GO:                                                    |       | 277 | 0.26 | 0.14 |   |
| BP | 0008 cell recognition                                  | 5/292 | /23 | 713  | 300  | 5 |
|    | 037                                                    |       | 328 | 178  | 216  |   |
|    | GO:                                                    |       | 81/ | 0.26 | 0.14 |   |
| BP | 0006 regulation of nucleotide metabolic process        | 2/292 | 233 | 937  | 375  | 2 |
|    | 140                                                    |       | 28  | 84   | 917  |   |
|    | GO:                                                    |       | 81/ | 0.26 | 0.14 |   |
| BP | 0051 regulation of mitochondrial membrane potential    | 2/292 | 233 | 937  | 375  | 2 |
|    | 881                                                    |       | 28  | 84   | 917  |   |
|    | GO:                                                    |       | 25/ | 0.27 | 0.14 |   |
| BP | 0007 neuromuscular synaptic transmission               | 1/292 | 233 | 025  | 375  | 1 |
|    | 274                                                    |       | 28  | 986  | 917  |   |
|    | GO:                                                    |       | 25/ | 0.27 | 0.14 |   |
| BP | 0007 axonal fasciculation                              | 1/292 | 233 | 025  | 375  | 1 |
|    | 413                                                    |       | 28  | 986  | 917  |   |

|    |      |                                                                            |       |      |      |       |
|----|------|----------------------------------------------------------------------------|-------|------|------|-------|
|    | GO:  |                                                                            | 25/   | 0.27 | 0.14 |       |
| BP | 0010 | regulation of platelet-derived growth factor<br>receptor signaling pathway | 1/292 | 233  | 025  | 375 1 |
|    | 640  |                                                                            |       | 28   | 986  | 917   |
|    | GO:  |                                                                            | 25/   | 0.27 | 0.14 |       |
| BP | 0010 | positive regulation of lipid storage                                       | 1/292 | 233  | 025  | 375 1 |
|    | 884  |                                                                            |       | 28   | 986  | 917   |
|    | GO:  |                                                                            | 25/   | 0.27 | 0.14 |       |
| BP | 0019 | virion assembly                                                            | 1/292 | 233  | 025  | 375 1 |
|    | 068  |                                                                            |       | 28   | 986  | 917   |
|    | GO:  |                                                                            | 25/   | 0.27 | 0.14 |       |
| BP | 0032 | negative regulation of type I interferon<br>production                     | 1/292 | 233  | 025  | 375 1 |
|    | 480  |                                                                            |       | 28   | 986  | 917   |
|    | GO:  |                                                                            | 25/   | 0.27 | 0.14 |       |
| BP | 0032 | negative regulation of phosphoprotein<br>phosphatase activity              | 1/292 | 233  | 025  | 375 1 |
|    | 515  |                                                                            |       | 28   | 986  | 917   |
|    | GO:  |                                                                            | 25/   | 0.27 | 0.14 |       |
| BP | 0032 | negative regulation of viral transcription                                 | 1/292 | 233  | 025  | 375 1 |
|    | 897  |                                                                            |       | 28   | 986  | 917   |
|    | GO:  |                                                                            | 25/   | 0.27 | 0.14 |       |
| BP | 0036 | post-anal tail morphogenesis                                               | 1/292 | 233  | 025  | 375 1 |
|    | 342  |                                                                            |       | 28   | 986  | 917   |
|    | GO:  |                                                                            | 25/   | 0.27 | 0.14 |       |
| BP | 0042 | indole-containing compound metabolic<br>process                            | 1/292 | 233  | 025  | 375 1 |
|    | 430  |                                                                            |       | 28   | 986  | 917   |
|    | GO:  |                                                                            | 25/   | 0.27 | 0.14 |       |
| BP | 0046 | nicotinamide nucleotide metabolic process                                  | 1/292 | 233  | 025  | 375 1 |
|    | 496  |                                                                            |       | 28   | 986  | 917   |
|    | GO:  |                                                                            | 25/   | 0.27 | 0.14 |       |
| BP | 0048 | negative regulation of skeletal muscle tissue<br>development               | 1/292 | 233  | 025  | 375 1 |
|    | 642  |                                                                            |       | 28   | 986  | 917   |
|    | GO:  |                                                                            | 25/   | 0.27 | 0.14 |       |
| BP | 0051 | RNA polymerase II preinitiation complex<br>assembly                        | 1/292 | 233  | 025  | 375 1 |
|    | 123  |                                                                            |       | 28   | 986  | 917   |
|    | GO:  |                                                                            | 25/   | 0.27 | 0.14 |       |
| BP | 0051 | positive regulation of focal adhesion<br>assembly                          | 1/292 | 233  | 025  | 375 1 |
|    | 894  |                                                                            |       | 28   | 986  | 917   |
|    | GO:  |                                                                            | 25/   | 0.27 | 0.14 |       |
| BP | 0060 | reflex                                                                     | 1/292 | 233  | 025  | 375 1 |
|    | 004  |                                                                            |       | 28   | 986  | 917   |
|    | GO:  |                                                                            | 25/   | 0.27 | 0.14 |       |
| BP | 0070 | transepithelial transport                                                  | 1/292 | 233  | 025  | 375 1 |
|    | 633  |                                                                            |       | 28   | 986  | 917   |

|    |                                              |       |     |      |      |   |
|----|----------------------------------------------|-------|-----|------|------|---|
|    | GO:                                          |       | 25/ | 0.27 | 0.14 |   |
| BP | 0071 protein K48-linked deubiquitination     | 1/292 | 233 | 025  | 375  | 1 |
|    | 108                                          |       | 28  | 986  | 917  |   |
|    | GO:                                          |       | 25/ | 0.27 | 0.14 |   |
| BP | 0071 adenylate cyclase-activating adrenergic | 1/292 | 233 | 025  | 375  | 1 |
|    | 880 receptor signaling pathway               |       | 28  | 986  | 917  |   |
|    | GO:                                          |       | 25/ | 0.27 | 0.14 |   |
| BP | 0098 cell aggregation                        | 1/292 | 233 | 025  | 375  | 1 |
|    | 743                                          |       | 28  | 986  | 917  |   |
|    | GO:                                          |       | 25/ | 0.27 | 0.14 |   |
| BP | 0106 neuron projection fasciculation         | 1/292 | 233 | 025  | 375  | 1 |
|    | 030                                          |       | 28  | 986  | 917  |   |
|    | GO:                                          |       | 82/ | 0.27 | 0.14 |   |
| BP | 0044 entry into host                         | 2/292 | 233 | 401  | 567  | 2 |
|    | 409                                          |       | 28  | 955  | 507  |   |
|    | GO:                                          |       | 82/ | 0.27 | 0.14 |   |
| BP | 1901 regulation of calcium ion transmembrane | 2/292 | 233 | 401  | 567  | 2 |
|    | 019 transporter activity                     |       | 28  | 955  | 507  |   |
|    | GO:                                          |       | 83/ | 0.27 | 0.14 |   |
| BP | 0001 morphogenesis of a polarized epithelium | 2/292 | 233 | 865  | 764  | 2 |
|    | 738                                          |       | 28  | 939  | 426  |   |
|    | GO:                                          |       | 83/ | 0.27 | 0.14 |   |
| BP | 0003 amino acid transmembrane transport      | 2/292 | 233 | 865  | 764  | 2 |
|    | 333                                          |       | 28  | 939  | 426  |   |
|    | GO:                                          |       | 83/ | 0.27 | 0.14 |   |
| BP | 0044 cellular amine metabolic process        | 2/292 | 233 | 865  | 764  | 2 |
|    | 106                                          |       | 28  | 939  | 426  |   |
|    | GO:                                          |       | 83/ | 0.27 | 0.14 |   |
| BP | 0051 membrane depolarization                 | 2/292 | 233 | 865  | 764  | 2 |
|    | 899                                          |       | 28  | 939  | 426  |   |
|    | GO:                                          |       | 26/ | 0.27 | 0.14 |   |
| BP | 0000 mitochondrial genome maintenance        | 1/292 | 233 | 940  | 764  | 1 |
|    | 002                                          |       | 28  | 392  | 426  |   |
|    | GO:                                          |       | 26/ | 0.27 | 0.14 |   |
| BP | 0000 response to superoxide                  | 1/292 | 233 | 940  | 764  | 1 |
|    | 303                                          |       | 28  | 392  | 426  |   |
|    | GO:                                          |       | 26/ | 0.27 | 0.14 |   |
| BP | 0000 DNA catabolic process, endonucleolytic  | 1/292 | 233 | 940  | 764  | 1 |
|    | 737                                          |       | 28  | 392  | 426  |   |
|    | GO:                                          |       | 26/ | 0.27 | 0.14 |   |
| BP | 0032 regulation of response to extracellular | 1/292 | 233 | 940  | 764  | 1 |
|    | 104 stimulus                                 |       | 28  | 392  | 426  |   |

|    |                                                                         |       |     |      |      |   |
|----|-------------------------------------------------------------------------|-------|-----|------|------|---|
|    | GO:                                                                     |       | 26/ | 0.27 | 0.14 |   |
| BP | 0032 regulation of response to nutrient levels                          | 1/292 | 233 | 940  | 764  | 1 |
|    | 107                                                                     |       | 28  | 392  | 426  |   |
|    | GO:                                                                     |       | 26/ | 0.27 | 0.14 |   |
| BP | 0033 integrin activation                                                | 1/292 | 233 | 940  | 764  | 1 |
|    | 622                                                                     |       | 28  | 392  | 426  |   |
|    | GO:                                                                     |       | 26/ | 0.27 | 0.14 |   |
| BP | 0046 monosaccharide catabolic process                                   | 1/292 | 233 | 940  | 764  | 1 |
|    | 365                                                                     |       | 28  | 392  | 426  |   |
|    | GO:                                                                     |       | 26/ | 0.27 | 0.14 |   |
| BP | 0055 response to lipoprotein particle                                   | 1/292 | 233 | 940  | 764  | 1 |
|    | 094                                                                     |       | 28  | 392  | 426  |   |
|    | GO:                                                                     |       | 26/ | 0.27 | 0.14 |   |
| BP | 0070 synaptonemal complex organization                                  | 1/292 | 233 | 940  | 764  | 1 |
|    | 193                                                                     |       | 28  | 392  | 426  |   |
|    | GO:                                                                     |       | 26/ | 0.27 | 0.14 |   |
| BP | 0090 negative regulation of cell aging                                  | 1/292 | 233 | 940  | 764  | 1 |
|    | 344                                                                     |       | 28  | 392  | 426  |   |
|    | GO:                                                                     |       | 26/ | 0.27 | 0.14 |   |
| BP | 0098 regulation of cardiac muscle cell action potential                 | 1/292 | 233 | 940  | 764  | 1 |
|    | 901                                                                     |       | 28  | 392  | 426  |   |
|    | GO:                                                                     |       | 26/ | 0.27 | 0.14 |   |
| BP | 0140 neuron projection arborization                                     | 1/292 | 233 | 940  | 764  | 1 |
|    | 058                                                                     |       | 28  | 392  | 426  |   |
|    | GO:                                                                     |       | 26/ | 0.27 | 0.14 |   |
| BP | 1904 negative regulation of cyclin-dependent protein kinase activity    | 1/292 | 233 | 940  | 764  | 1 |
|    | 030                                                                     |       | 28  | 392  | 426  |   |
|    | GO:                                                                     |       | 26/ | 0.27 | 0.14 |   |
| BP | 1904 negative regulation of protein localization to cell periphery      | 1/292 | 233 | 940  | 764  | 1 |
|    | 376                                                                     |       | 28  | 392  | 426  |   |
|    | GO:                                                                     |       | 26/ | 0.27 | 0.14 |   |
| BP | 2000 regulation of non-canonical Wnt signaling pathway                  | 1/292 | 233 | 940  | 764  | 1 |
|    | 050                                                                     |       | 28  | 392  | 426  |   |
|    | GO:                                                                     |       | 26/ | 0.27 | 0.14 |   |
| BP | 2000 regulation of AMPA receptor activity                               | 1/292 | 233 | 940  | 764  | 1 |
|    | 311                                                                     |       | 28  | 392  | 426  |   |
|    | GO:                                                                     |       | 26/ | 0.27 | 0.14 |   |
| BP | 2000 positive regulation of transcription regulatory region DNA binding | 1/292 | 233 | 940  | 764  | 1 |
|    | 679                                                                     |       | 28  | 392  | 426  |   |
|    | GO:                                                                     |       | 352 | 0.27 | 0.14 |   |
| BP | 0034 nucleobase-containing compound catabolic process                   | 6/292 | /23 | 968  | 774  | 6 |
|    | 655                                                                     |       | 328 | 225  | 903  |   |

|    |                                                                       |       |     |      |      |   |
|----|-----------------------------------------------------------------------|-------|-----|------|------|---|
|    | GO:                                                                   |       | 84/ | 0.28 | 0.14 |   |
| BP | 0070 bicellular tight junction assembly                               | 2/292 | 233 | 329  | 961  | 2 |
|    | 830                                                                   |       | 28  | 722  | 589  |   |
|    | GO:                                                                   |       | 354 | 0.28 | 0.14 |   |
| BP | 0006 purine nucleotide metabolic process                              | 6/292 | /23 | 396  | 992  | 6 |
|    | 163                                                                   |       | 328 | 689  | 665  |   |
|    | GO:                                                                   |       | 355 | 0.28 | 0.15 |   |
| BP | 0006 regulation of translation                                        | 6/292 | /23 | 611  | 101  | 6 |
|    | 417                                                                   |       | 328 | 472  | 743  |   |
|    | GO:                                                                   |       | 427 | 0.28 | 0.15 |   |
| BP | 0009 nucleotide metabolic process                                     | 7/292 | /23 | 816  | 124  | 7 |
|    | 117                                                                   |       | 328 | 458  | 645  |   |
|    | GO:                                                                   |       | 27/ | 0.28 | 0.15 |   |
| BP | 0000 response to oxygen radical                                       | 1/292 | 233 | 843  | 124  | 1 |
|    | 305                                                                   |       | 28  | 38   | 645  |   |
|    | GO:                                                                   |       | 27/ | 0.28 | 0.15 |   |
| BP | 0002 antigen processing and presentation of exogenous peptide antigen | 1/292 | 233 | 843  | 124  | 1 |
|    | 478                                                                   |       | 28  | 38   | 645  |   |
|    | GO:                                                                   |       | 27/ | 0.28 | 0.15 |   |
| BP | 0010 positive regulation of G2/M transition of mitotic cell cycle     | 1/292 | 233 | 843  | 124  | 1 |
|    | 971                                                                   |       | 28  | 38   | 645  |   |
|    | GO:                                                                   |       | 27/ | 0.28 | 0.15 |   |
| BP | 0015 norepinephrine transport                                         | 1/292 | 233 | 843  | 124  | 1 |
|    | 874                                                                   |       | 28  | 38   | 645  |   |
|    | GO:                                                                   |       | 27/ | 0.28 | 0.15 |   |
| BP | 0030 positive regulation of blood coagulation                         | 1/292 | 233 | 843  | 124  | 1 |
|    | 194                                                                   |       | 28  | 38   | 645  |   |
|    | GO:                                                                   |       | 27/ | 0.28 | 0.15 |   |
| BP | 0031 negative regulation of cell killing                              | 1/292 | 233 | 843  | 124  | 1 |
|    | 342                                                                   |       | 28  | 38   | 645  |   |
|    | GO:                                                                   |       | 27/ | 0.28 | 0.15 |   |
| BP | 0032 microvillus organization                                         | 1/292 | 233 | 843  | 124  | 1 |
|    | 528                                                                   |       | 28  | 38   | 645  |   |
|    | GO:                                                                   |       | 27/ | 0.28 | 0.15 |   |
| BP | 0033 regulation of osteoblast proliferation                           | 1/292 | 233 | 843  | 124  | 1 |
|    | 688                                                                   |       | 28  | 38   | 645  |   |
|    | GO:                                                                   |       | 27/ | 0.28 | 0.15 |   |
| BP | 0042 fluid transport                                                  | 1/292 | 233 | 843  | 124  | 1 |
|    | 044                                                                   |       | 28  | 38   | 645  |   |
|    | GO:                                                                   |       | 27/ | 0.28 | 0.15 |   |
| BP | 0045 positive regulation of bone resorption                           | 1/292 | 233 | 843  | 124  | 1 |
|    | 780                                                                   |       | 28  | 38   | 645  |   |

|    |                                                   |       |     |      |      |   |
|----|---------------------------------------------------|-------|-----|------|------|---|
|    | GO:                                               |       | 27/ | 0.28 | 0.15 |   |
| BP | 0046 positive regulation of bone remodeling       | 1/292 | 233 | 843  | 124  | 1 |
|    | 852                                               |       | 28  | 38   | 645  |   |
|    | GO:                                               |       | 27/ | 0.28 | 0.15 |   |
| BP | 0046 regulation of hormone biosynthetic process   | 1/292 | 233 | 843  | 124  | 1 |
|    | 885                                               |       | 28  | 38   | 645  |   |
|    | GO:                                               |       | 27/ | 0.28 | 0.15 |   |
| BP | 0048 smooth muscle tissue development             | 1/292 | 233 | 843  | 124  | 1 |
|    | 745                                               |       | 28  | 38   | 645  |   |
|    | GO:                                               |       | 27/ | 0.28 | 0.15 |   |
| BP | 0048 animal organ maturation                      | 1/292 | 233 | 843  | 124  | 1 |
|    | 799                                               |       | 28  | 38   | 645  |   |
|    | GO:                                               |       | 27/ | 0.28 | 0.15 |   |
| BP | 0060 Sertoli cell differentiation                 | 1/292 | 233 | 843  | 124  | 1 |
|    | 008                                               |       | 28  | 38   | 645  |   |
|    | GO:                                               |       | 27/ | 0.28 | 0.15 |   |
| BP | 0060 labyrinthine layer blood vessel development  | 1/292 | 233 | 843  | 124  | 1 |
|    | 716                                               |       | 28  | 38   | 645  |   |
|    | GO:                                               |       | 27/ | 0.28 | 0.15 |   |
| BP | 0061 retina vasculature development in camera-    | 1/292 | 233 | 843  | 124  | 1 |
|    | 298 type eye                                      |       | 28  | 38   | 645  |   |
|    | GO:                                               |       | 27/ | 0.28 | 0.15 |   |
| BP | 0071 cellular response to ethanol                 | 1/292 | 233 | 843  | 124  | 1 |
|    | 361                                               |       | 28  | 38   | 645  |   |
|    | GO:                                               |       | 27/ | 0.28 | 0.15 |   |
| BP | 1900 positive regulation of hemostasis            | 1/292 | 233 | 843  | 124  | 1 |
|    | 048                                               |       | 28  | 38   | 645  |   |
|    | GO:                                               |       | 27/ | 0.28 | 0.15 |   |
| BP | 1902 positive regulation of response to oxidative | 1/292 | 233 | 843  | 124  | 1 |
|    | 884 stress                                        |       | 28  | 38   | 645  |   |
|    | GO:                                               |       | 27/ | 0.28 | 0.15 |   |
| BP | 1903 regulation of bone development               | 1/292 | 233 | 843  | 124  | 1 |
|    | 010                                               |       | 28  | 38   | 645  |   |
|    | GO:                                               |       | 27/ | 0.28 | 0.15 |   |
| BP | 1905 negative regulation of synapse organization  | 1/292 | 233 | 843  | 124  | 1 |
|    | 809                                               |       | 28  | 38   | 645  |   |
|    | GO:                                               |       | 86/ | 0.29 | 0.15 |   |
| BP | 0006 response to osmotic stress                   | 2/292 | 233 | 256  | 332  | 2 |
|    | 970                                               |       | 28  | 417  | 516  |   |
|    | GO:                                               |       | 86/ | 0.29 | 0.15 |   |
| BP | 0097 lamellipodium organization                   | 2/292 | 233 | 256  | 332  | 2 |
|    | 581                                               |       | 28  | 417  | 516  |   |



|    |                                                      |       |     |      |      |   |
|----|------------------------------------------------------|-------|-----|------|------|---|
|    | GO:                                                  |       | 430 | 0.29 | 0.15 |   |
| BP | 0016 Wnt signaling pathway                           | 7/292 | 723 | 405  | 406  | 7 |
|    | 055                                                  |       | 328 | 819  | 438  |   |
|    | GO:                                                  |       | 87/ | 0.29 | 0.15 |   |
| BP | 0035 regulation of protein dephosphorylation         | 2/292 | 233 | 719  | 482  | 2 |
|    | 304                                                  |       | 28  | 2    | 242  |   |
|    | GO:                                                  |       | 28/ | 0.29 | 0.15 |   |
| BP | 0006 serotonin transport                             | 1/292 | 233 | 735  | 482  | 1 |
|    | 837                                                  |       | 28  | 089  | 242  |   |
|    | GO:                                                  |       | 28/ | 0.29 | 0.15 |   |
| BP | 0008 determination of adult lifespan                 | 1/292 | 233 | 735  | 482  | 1 |
|    | 340                                                  |       | 28  | 089  | 242  |   |
|    | GO:                                                  |       | 28/ | 0.29 | 0.15 |   |
| BP | 0010 regulation of proton transport                  | 1/292 | 233 | 735  | 482  | 1 |
|    | 155                                                  |       | 28  | 089  | 242  |   |
|    | GO:                                                  |       | 28/ | 0.29 | 0.15 |   |
| BP | 0010 exit from mitosis                               | 1/292 | 233 | 735  | 482  | 1 |
|    | 458                                                  |       | 28  | 089  | 242  |   |
|    | GO:                                                  |       | 28/ | 0.29 | 0.15 |   |
| BP | 0019 pyridine nucleotide metabolic process           | 1/292 | 233 | 735  | 482  | 1 |
|    | 362                                                  |       | 28  | 089  | 242  |   |
|    | GO:                                                  |       | 28/ | 0.29 | 0.15 |   |
| BP | 0019 cytolysis                                       | 1/292 | 233 | 735  | 482  | 1 |
|    | 835                                                  |       | 28  | 089  | 242  |   |
|    | GO:                                                  |       | 28/ | 0.29 | 0.15 |   |
| BP | 0030 monocyte differentiation                        | 1/292 | 233 | 735  | 482  | 1 |
|    | 224                                                  |       | 28  | 089  | 242  |   |
|    | GO:                                                  |       | 28/ | 0.29 | 0.15 |   |
| BP | 0032 receptor catabolic process                      | 1/292 | 233 | 735  | 482  | 1 |
|    | 801                                                  |       | 28  | 089  | 242  |   |
|    | GO:                                                  |       | 28/ | 0.29 | 0.15 |   |
| BP | 0033 regulation of protein sumoylation               | 1/292 | 233 | 735  | 482  | 1 |
|    | 233                                                  |       | 28  | 089  | 242  |   |
|    | GO:                                                  |       | 28/ | 0.29 | 0.15 |   |
| BP | 0042 hydrogen peroxide catabolic process             | 1/292 | 233 | 735  | 482  | 1 |
|    | 744                                                  |       | 28  | 089  | 242  |   |
|    | GO:                                                  |       | 28/ | 0.29 | 0.15 |   |
| BP | 0045 positive regulation of myoblast differentiation | 1/292 | 233 | 735  | 482  | 1 |
|    | 663                                                  |       | 28  | 089  | 242  |   |
|    | GO:                                                  |       | 28/ | 0.29 | 0.15 |   |
| BP | 0045 negative regulation of embryonic development    | 1/292 | 233 | 735  | 482  | 1 |
|    | 992                                                  |       | 28  | 089  | 242  |   |

|    |                                                                                       |       |     |      |      |   |
|----|---------------------------------------------------------------------------------------|-------|-----|------|------|---|
|    | GO:                                                                                   |       | 28/ | 0.29 | 0.15 |   |
| BP | 0060 pharyngeal system development                                                    | 1/292 | 233 | 735  | 482  | 1 |
|    | 037                                                                                   |       | 28  | 089  | 242  |   |
|    | GO:                                                                                   |       | 28/ | 0.29 | 0.15 |   |
| BP | 0060 innervation                                                                      | 1/292 | 233 | 735  | 482  | 1 |
|    | 384                                                                                   |       | 28  | 089  | 242  |   |
|    | GO:                                                                                   |       | 28/ | 0.29 | 0.15 |   |
| BP | 0061 establishment of skin barrier                                                    | 1/292 | 233 | 735  | 482  | 1 |
|    | 436                                                                                   |       | 28  | 089  | 242  |   |
|    | GO:                                                                                   |       | 28/ | 0.29 | 0.15 |   |
| BP | 0071 protein localization to chromatin                                                | 1/292 | 233 | 735  | 482  | 1 |
|    | 168                                                                                   |       | 28  | 089  | 242  |   |
|    | GO:                                                                                   |       | 28/ | 0.29 | 0.15 |   |
| BP | 0071 cellular response to lipoprotein particle stimulus                               | 1/292 | 233 | 735  | 482  | 1 |
|    | 402                                                                                   |       | 28  | 089  | 242  |   |
|    | GO:                                                                                   |       | 28/ | 0.29 | 0.15 |   |
| BP | 0071 adrenergic receptor signaling pathway                                            | 1/292 | 233 | 735  | 482  | 1 |
|    | 875                                                                                   |       | 28  | 089  | 242  |   |
|    | GO:                                                                                   |       | 28/ | 0.29 | 0.15 |   |
| BP | 1901 regulation of hematopoietic progenitor cell differentiation                      | 1/292 | 233 | 735  | 482  | 1 |
|    | 532                                                                                   |       | 28  | 089  | 242  |   |
|    | GO:                                                                                   |       | 28/ | 0.29 | 0.15 |   |
| BP | 1903 mononuclear cell differentiation                                                 | 1/292 | 233 | 735  | 482  | 1 |
|    | 131                                                                                   |       | 28  | 089  | 242  |   |
|    | GO:                                                                                   |       | 28/ | 0.29 | 0.15 |   |
| BP | 1903 positive regulation of dendrite extension                                        | 1/292 | 233 | 735  | 482  | 1 |
|    | 861                                                                                   |       | 28  | 089  | 242  |   |
|    | GO:                                                                                   |       | 432 | 0.29 | 0.15 |   |
| BP | 0198 cell-cell signaling by wnt                                                       | 7/292 | /23 | 800  | 511  | 7 |
|    | 738                                                                                   |       | 328 | 24   | 787  |   |
|    | GO:                                                                                   |       | 88/ | 0.30 | 0.15 |   |
| BP | 0032 positive regulation of proteasomal ubiquitin-dependent protein catabolic process | 2/292 | 233 | 181  | 696  | 2 |
|    | 436                                                                                   |       | 28  | 522  | 97   |   |
|    | GO:                                                                                   |       | 88/ | 0.30 | 0.15 |   |
| BP | 0035 skeletal muscle cell differentiation                                             | 2/292 | 233 | 181  | 696  | 2 |
|    | 914                                                                                   |       | 28  | 522  | 97   |   |
|    | GO:                                                                                   |       | 88/ | 0.30 | 0.15 |   |
| BP | 1903 negative regulation of mRNA metabolic process                                    | 2/292 | 233 | 181  | 696  | 2 |
|    | 312                                                                                   |       | 28  | 522  | 97   |   |
|    | GO:                                                                                   |       | 222 | 0.30 | 0.15 |   |
| BP | 2001 regulation of response to DNA damage stimulus                                    | 4/292 | /23 | 278  | 742  | 4 |
|    | 020                                                                                   |       | 328 | 547  | 995  |   |

|    |                                                                             |       |     |      |      |   |
|----|-----------------------------------------------------------------------------|-------|-----|------|------|---|
|    | GO:                                                                         |       | 363 | 0.30 | 0.15 |   |
| BP | 1990 protein localization to cell periphery                                 | 6/292 | /23 | 341  | 771  | 6 |
|    | 778                                                                         |       | 328 | 871  | 475  |   |
|    | GO:                                                                         |       | 223 | 0.30 | 0.15 |   |
| BP | 0007 establishment or maintenance of cell polarity                          | 4/292 | /23 | 559  | 820  | 4 |
|    | 163                                                                         |       | 328 | 661  | 206  |   |
|    | GO:                                                                         |       | 436 | 0.30 | 0.15 |   |
| BP | 0006 nucleoside phosphate metabolic process                                 | 7/292 | /23 | 592  | 820  | 7 |
|    | 753                                                                         |       | 328 | 495  | 206  |   |
|    | GO:                                                                         |       | 29/ | 0.30 | 0.15 |   |
| BP | 0007 gamma-aminobutyric acid signaling pathway                              | 1/292 | 233 | 615  | 820  | 1 |
|    | 214                                                                         |       | 28  | 663  | 206  |   |
|    | GO:                                                                         |       | 29/ | 0.30 | 0.15 |   |
| BP | 0010 miRNA metabolic process                                                | 1/292 | 233 | 615  | 820  | 1 |
|    | 586                                                                         |       | 28  | 663  | 206  |   |
|    | GO:                                                                         |       | 29/ | 0.30 | 0.15 |   |
| BP | 0030 apoptotic nuclear changes                                              | 1/292 | 233 | 615  | 820  | 1 |
|    | 262                                                                         |       | 28  | 663  | 206  |   |
|    | GO:                                                                         |       | 29/ | 0.30 | 0.15 |   |
| BP | 0031 regulation of histone deacetylation                                    | 1/292 | 233 | 615  | 820  | 1 |
|    | 063                                                                         |       | 28  | 663  | 206  |   |
|    | GO:                                                                         |       | 29/ | 0.30 | 0.15 |   |
| BP | 0033 positive regulation of peptidyl-serine phosphorylation of STAT protein | 1/292 | 233 | 615  | 820  | 1 |
|    | 141                                                                         |       | 28  | 663  | 206  |   |
|    | GO:                                                                         |       | 29/ | 0.30 | 0.15 |   |
| BP | 0033 response to ATP                                                        | 1/292 | 233 | 615  | 820  | 1 |
|    | 198                                                                         |       | 28  | 663  | 206  |   |
|    | GO:                                                                         |       | 29/ | 0.30 | 0.15 |   |
| BP | 0033 response to vitamin                                                    | 1/292 | 233 | 615  | 820  | 1 |
|    | 273                                                                         |       | 28  | 663  | 206  |   |
|    | GO:                                                                         |       | 29/ | 0.30 | 0.15 |   |
| BP | 0045 regulation of circadian sleep/wake cycle, sleep                        | 1/292 | 233 | 615  | 820  | 1 |
|    | 187                                                                         |       | 28  | 663  | 206  |   |
|    | GO:                                                                         |       | 29/ | 0.30 | 0.15 |   |
| BP | 0045 regulation of adenylate cyclase activity                               | 1/292 | 233 | 615  | 820  | 1 |
|    | 761                                                                         |       | 28  | 663  | 206  |   |
|    | GO:                                                                         |       | 29/ | 0.30 | 0.15 |   |
| BP | 0048 positive regulation of skeletal muscle tissue development              | 1/292 | 233 | 615  | 820  | 1 |
|    | 643                                                                         |       | 28  | 663  | 206  |   |
|    | GO:                                                                         |       | 29/ | 0.30 | 0.15 |   |
| BP | 0061 regulation of cell growth involved in cardiac muscle cell development  | 1/292 | 233 | 615  | 820  | 1 |
|    | 050                                                                         |       | 28  | 663  | 206  |   |

|    |                                                                              |       |     |      |      |   |  |
|----|------------------------------------------------------------------------------|-------|-----|------|------|---|--|
|    | GO:                                                                          |       | 29/ | 0.30 | 0.15 |   |  |
| BP | 0070 sarcoplasmic reticulum calcium ion transport                            | 1/292 | 233 | 615  | 820  | 1 |  |
|    | 296                                                                          |       | 28  | 663  | 206  |   |  |
|    | GO:                                                                          |       | 29/ | 0.30 | 0.15 |   |  |
| BP | 0070 transcription preinitiation complex assembly                            | 1/292 | 233 | 615  | 820  | 1 |  |
|    | 897                                                                          |       | 28  | 663  | 206  |   |  |
|    | GO:                                                                          |       | 29/ | 0.30 | 0.15 |   |  |
| BP | 0090 positive regulation of triglyceride metabolic process                   | 1/292 | 233 | 615  | 820  | 1 |  |
|    | 208                                                                          |       | 28  | 663  | 206  |   |  |
|    | GO:                                                                          |       | 29/ | 0.30 | 0.15 |   |  |
| BP | 0090 positive regulation of protein deacetylation                            | 1/292 | 233 | 615  | 820  | 1 |  |
|    | 312                                                                          |       | 28  | 663  | 206  |   |  |
|    | GO:                                                                          |       | 29/ | 0.30 | 0.15 |   |  |
| BP | 0090 positive regulation of protein targeting to membrane                    | 1/292 | 233 | 615  | 820  | 1 |  |
|    | 314                                                                          |       | 28  | 663  | 206  |   |  |
|    | GO:                                                                          |       | 29/ | 0.30 | 0.15 |   |  |
| BP | 0150 positive regulation of cell-substrate junction organization             | 1/292 | 233 | 615  | 820  | 1 |  |
|    | 117                                                                          |       | 28  | 663  | 206  |   |  |
|    | GO:                                                                          |       | 29/ | 0.30 | 0.15 |   |  |
| BP | 1900 regulation of ruffle assembly                                           | 1/292 | 233 | 615  | 820  | 1 |  |
|    | 027                                                                          |       | 28  | 663  | 206  |   |  |
|    | GO:                                                                          |       | 29/ | 0.30 | 0.15 |   |  |
| BP | 2000 negative regulation of signaling receptor activity                      | 1/292 | 233 | 615  | 820  | 1 |  |
|    | 272                                                                          |       | 28  | 663  | 206  |   |  |
|    | GO:                                                                          |       | 89/ | 0.30 | 0.15 |   |  |
| BP | 0042 signal transduction in response to DNA damage                           | 2/292 | 233 | 643  | 830  | 2 |  |
|    | 770                                                                          |       | 28  | 322  | 065  |   |  |
|    | GO:                                                                          |       | 90/ | 0.31 | 0.16 |   |  |
| BP | 0007 cell-substrate junction assembly                                        | 2/292 | 233 | 104  | 054  | 2 |  |
|    | 044                                                                          |       | 28  | 543  | 844  |   |  |
|    | GO:                                                                          |       | 90/ | 0.31 | 0.16 |   |  |
| BP | 0009 cellular amino acid catabolic process                                   | 2/292 | 233 | 104  | 054  | 2 |  |
|    | 063                                                                          |       | 28  | 543  | 844  |   |  |
|    | GO:                                                                          |       | 90/ | 0.31 | 0.16 |   |  |
| BP | 0043 negative regulation of protein-containing complex disassembly           | 2/292 | 233 | 104  | 054  | 2 |  |
|    | 242                                                                          |       | 28  | 543  | 844  |   |  |
|    | GO:                                                                          |       | 30/ | 0.31 | 0.16 |   |  |
| BP | 0005 regulation of glycogen biosynthetic process                             | 1/292 | 233 | 485  | 201  | 1 |  |
|    | 979                                                                          |       | 28  | 238  | 492  |   |  |
|    | GO:                                                                          |       | 30/ | 0.31 | 0.16 |   |  |
| BP | 0006 cellular component disassembly involved in execution phase of apoptosis | 1/292 | 233 | 485  | 201  | 1 |  |
|    | 921                                                                          |       | 28  | 238  | 492  |   |  |

|    |                                                              |       |     |      |      |   |  |
|----|--------------------------------------------------------------|-------|-----|------|------|---|--|
|    | GO:                                                          |       | 30/ | 0.31 | 0.16 |   |  |
| BP | 0010 positive regulation of phosphatase activity             | 1/292 | 233 | 485  | 201  | 1 |  |
|    | 922                                                          |       | 28  | 238  | 492  |   |  |
|    | GO:                                                          |       | 30/ | 0.31 | 0.16 |   |  |
| BP | 0010 negative regulation of protein processing               | 1/292 | 233 | 485  | 201  | 1 |  |
|    | 955                                                          |       | 28  | 238  | 492  |   |  |
|    | GO:                                                          |       | 30/ | 0.31 | 0.16 |   |  |
| BP | 0010 regulation of glucan biosynthetic process               | 1/292 | 233 | 485  | 201  | 1 |  |
|    | 962                                                          |       | 28  | 238  | 492  |   |  |
|    | GO:                                                          |       | 30/ | 0.31 | 0.16 |   |  |
| BP | 0035 embryonic hemopoiesis                                   | 1/292 | 233 | 485  | 201  | 1 |  |
|    | 162                                                          |       | 28  | 238  | 492  |   |  |
|    | GO:                                                          |       | 30/ | 0.31 | 0.16 |   |  |
| BP | 0050 circadian sleep/wake cycle, sleep                       | 1/292 | 233 | 485  | 201  | 1 |  |
|    | 802                                                          |       | 28  | 238  | 492  |   |  |
|    | GO:                                                          |       | 30/ | 0.31 | 0.16 |   |  |
| BP | 0050 positive regulation of coagulation                      | 1/292 | 233 | 485  | 201  | 1 |  |
|    | 820                                                          |       | 28  | 238  | 492  |   |  |
|    | GO:                                                          |       | 30/ | 0.31 | 0.16 |   |  |
| BP | 1902 positive regulation of cell cycle G2/M phase transition | 1/292 | 233 | 485  | 201  | 1 |  |
|    | 751                                                          |       | 28  | 238  | 492  |   |  |
|    | GO:                                                          |       | 30/ | 0.31 | 0.16 |   |  |
| BP | 1903 negative regulation of protein maturation               | 1/292 | 233 | 485  | 201  | 1 |  |
|    | 318                                                          |       | 28  | 238  | 492  |   |  |
|    | GO:                                                          |       | 30/ | 0.31 | 0.16 |   |  |
| BP | 1903 negative regulation of ATP metabolic process            | 1/292 | 233 | 485  | 201  | 1 |  |
|    | 579                                                          |       | 28  | 238  | 492  |   |  |
|    | GO:                                                          |       | 91/ | 0.31 | 0.16 |   |  |
| BP | 0002 mucosal immune response                                 | 2/292 | 233 | 565  | 238  | 2 |  |
|    | 385                                                          |       | 28  | 124  | 071  |   |  |
|    | GO:                                                          |       | 227 | 0.31 | 0.16 |   |  |
| BP | 0071 cellular response to inorganic substance                | 4/292 | /23 | 686  | 296  | 4 |  |
|    | 241                                                          |       | 328 | 762  | 102  |   |  |
|    | GO:                                                          |       | 298 | 0.31 | 0.16 |   |  |
| BP | 0009 response to light stimulus                              | 5/292 | /23 | 791  | 345  | 5 |  |
|    | 416                                                          |       | 328 | 068  | 19   |   |  |
|    | GO:                                                          |       | 92/ | 0.32 | 0.16 |   |  |
| BP | 0000 autophagosome assembly                                  | 2/292 | 233 | 025  | 460  | 2 |  |
|    | 045                                                          |       | 28  | 012  | 884  |   |  |
|    | GO:                                                          |       | 159 | 0.32 | 0.16 |   |  |
| BP | 0007 cell aging                                              | 3/292 | /23 | 063  | 476  | 3 |  |
|    | 569                                                          |       | 328 | 602  | 13   |   |  |

|    |                                                                     |       |     |      |      |   |
|----|---------------------------------------------------------------------|-------|-----|------|------|---|
|    | GO:                                                                 |       | 31/ | 0.32 | 0.16 |   |
| BP | 0000 establishment of mitotic spindle orientation                   | 1/292 | 233 | 343  | 532  | 1 |
|    | 132                                                                 |       | 28  | 951  | 715  |   |
|    | GO:                                                                 |       | 31/ | 0.32 | 0.16 |   |
| BP | 0001 blastocyst growth                                              | 1/292 | 233 | 343  | 532  | 1 |
|    | 832                                                                 |       | 28  | 951  | 715  |   |
|    | GO:                                                                 |       | 31/ | 0.32 | 0.16 |   |
| BP | 0001 endochondral ossification                                      | 1/292 | 233 | 343  | 532  | 1 |
|    | 958                                                                 |       | 28  | 951  | 715  |   |
|    | GO:                                                                 |       | 31/ | 0.32 | 0.16 |   |
| BP | 0010 regulation of tumor necrosis factor-mediated signaling pathway | 1/292 | 233 | 343  | 532  | 1 |
|    | 803                                                                 |       | 28  | 951  | 715  |   |
|    | GO:                                                                 |       | 31/ | 0.32 | 0.16 |   |
| BP | 0021 cell differentiation in hindbrain                              | 1/292 | 233 | 343  | 532  | 1 |
|    | 533                                                                 |       | 28  | 951  | 715  |   |
|    | GO:                                                                 |       | 31/ | 0.32 | 0.16 |   |
| BP | 0022 myelination in peripheral nervous system                       | 1/292 | 233 | 343  | 532  | 1 |
|    | 011                                                                 |       | 28  | 951  | 715  |   |
|    | GO:                                                                 |       | 31/ | 0.32 | 0.16 |   |
| BP | 0032 peripheral nervous system axon ensheathment                    | 1/292 | 233 | 343  | 532  | 1 |
|    | 292                                                                 |       | 28  | 951  | 715  |   |
|    | GO:                                                                 |       | 31/ | 0.32 | 0.16 |   |
| BP | 0033 negative regulation of peptidyl-serine phosphorylation         | 1/292 | 233 | 343  | 532  | 1 |
|    | 137                                                                 |       | 28  | 951  | 715  |   |
|    | GO:                                                                 |       | 31/ | 0.32 | 0.16 |   |
| BP | 0033 osteoblast proliferation                                       | 1/292 | 233 | 343  | 532  | 1 |
|    | 687                                                                 |       | 28  | 951  | 715  |   |
|    | GO:                                                                 |       | 31/ | 0.32 | 0.16 |   |
| BP | 0036 CD8-positive, alpha-beta T cell activation                     | 1/292 | 233 | 343  | 532  | 1 |
|    | 037                                                                 |       | 28  | 951  | 715  |   |
|    | GO:                                                                 |       | 31/ | 0.32 | 0.16 |   |
| BP | 0036 replacement ossification                                       | 1/292 | 233 | 343  | 532  | 1 |
|    | 075                                                                 |       | 28  | 951  | 715  |   |
|    | GO:                                                                 |       | 31/ | 0.32 | 0.16 |   |
| BP | 0042 heme metabolic process                                         | 1/292 | 233 | 343  | 532  | 1 |
|    | 168                                                                 |       | 28  | 951  | 715  |   |
|    | GO:                                                                 |       | 31/ | 0.32 | 0.16 |   |
| BP | 0044 modulation by host of viral process                            | 1/292 | 233 | 343  | 532  | 1 |
|    | 788                                                                 |       | 28  | 951  | 715  |   |
|    | GO:                                                                 |       | 31/ | 0.32 | 0.16 |   |
| BP | 0045 negative regulation of exocytosis                              | 1/292 | 233 | 343  | 532  | 1 |
|    | 920                                                                 |       | 28  | 951  | 715  |   |

|    |                                                                                |       |     |      |      |   |
|----|--------------------------------------------------------------------------------|-------|-----|------|------|---|
|    | GO:                                                                            |       | 31/ | 0.32 | 0.16 |   |
| BP | 0051 negative regulation of stress fiber assembly                              | 1/292 | 233 | 343  | 532  | 1 |
|    | 497                                                                            |       | 28  | 951  | 715  |   |
|    | GO:                                                                            |       | 31/ | 0.32 | 0.16 |   |
| BP | 0060 auditory receptor cell development                                        | 1/292 | 233 | 343  | 532  | 1 |
|    | 117                                                                            |       | 28  | 951  | 715  |   |
|    | GO:                                                                            |       | 31/ | 0.32 | 0.16 |   |
| BP | 0060 cell fate commitment involved in formation of primary germ layer          | 1/292 | 233 | 343  | 532  | 1 |
|    | 795                                                                            |       | 28  | 951  | 715  |   |
|    | GO:                                                                            |       | 31/ | 0.32 | 0.16 |   |
| BP | 0098 neurotransmitter reuptake                                                 | 1/292 | 233 | 343  | 532  | 1 |
|    | 810                                                                            |       | 28  | 951  | 715  |   |
|    | GO:                                                                            |       | 31/ | 0.32 | 0.16 |   |
| BP | 1902 regulation of intrinsic apoptotic signaling pathway by p53 class mediator | 1/292 | 233 | 343  | 532  | 1 |
|    | 253                                                                            |       | 28  | 951  | 715  |   |
|    | GO:                                                                            |       | 93/ | 0.32 | 0.16 |   |
| BP | 0035 negative regulation of dephosphorylation                                  | 2/292 | 233 | 484  | 590  | 2 |
|    | 305                                                                            |       | 28  | 15   | 591  |   |
|    | GO:                                                                            |       | 93/ | 0.32 | 0.16 |   |
| BP | 0043 apical junction assembly                                                  | 2/292 | 233 | 484  | 590  | 2 |
|    | 297                                                                            |       | 28  | 15   | 591  |   |
|    | GO:                                                                            |       | 93/ | 0.32 | 0.16 |   |
| BP | 0150 cell-substrate junction organization                                      | 2/292 | 233 | 484  | 590  | 2 |
|    | 115                                                                            |       | 28  | 15   | 591  |   |
|    | GO:                                                                            |       | 94/ | 0.32 | 0.16 |   |
| BP | 0070 actin-mediated cell contraction                                           | 2/292 | 233 | 942  | 820  | 2 |
|    | 252                                                                            |       | 28  | 486  | 021  |   |
|    | GO:                                                                            |       | 32/ | 0.33 | 0.16 |   |
| BP | 0001 oocyte maturation                                                         | 1/292 | 233 | 191  | 881  | 1 |
|    | 556                                                                            |       | 28  | 939  | 991  |   |
|    | GO:                                                                            |       | 32/ | 0.33 | 0.16 |   |
| BP | 0006 tricarboxylic acid cycle                                                  | 1/292 | 233 | 191  | 881  | 1 |
|    | 099                                                                            |       | 28  | 939  | 991  |   |
|    | GO:                                                                            |       | 32/ | 0.33 | 0.16 |   |
| BP | 0010 negative regulation of cardiac muscle hypertrophy                         | 1/292 | 233 | 191  | 881  | 1 |
|    | 614                                                                            |       | 28  | 939  | 991  |   |
|    | GO:                                                                            |       | 32/ | 0.33 | 0.16 |   |
| BP | 0016 negative regulation of macroautophagy                                     | 1/292 | 233 | 191  | 881  | 1 |
|    | 242                                                                            |       | 28  | 939  | 991  |   |
|    | GO:                                                                            |       | 32/ | 0.33 | 0.16 |   |
| BP | 0021 cerebellar cortex formation                                               | 1/292 | 233 | 191  | 881  | 1 |
|    | 697                                                                            |       | 28  | 939  | 991  |   |

|    |      |                                                                  |       |      |      |       |
|----|------|------------------------------------------------------------------|-------|------|------|-------|
|    | GO:  |                                                                  | 32/   | 0.33 | 0.16 |       |
| BP | 0033 | regulation of peptidyl-serine phosphorylation of STAT protein    | 1/292 | 233  | 191  | 881 1 |
|    | 139  |                                                                  |       | 28   | 939  | 991   |
|    | GO:  |                                                                  | 32/   | 0.33 | 0.16 |       |
| BP | 0045 | positive regulation of gene expression, epigenetic               | 1/292 | 233  | 191  | 881 1 |
|    | 815  |                                                                  |       | 28   | 939  | 991   |
|    | GO:  |                                                                  | 32/   | 0.33 | 0.16 |       |
| BP | 0051 | positive regulation of filopodium assembly                       | 1/292 | 233  | 191  | 881 1 |
|    | 491  |                                                                  |       | 28   | 939  | 991   |
|    | GO:  |                                                                  | 32/   | 0.33 | 0.16 |       |
| BP | 0055 | negative regulation of cardiac muscle tissue growth              | 1/292 | 233  | 191  | 881 1 |
|    | 022  |                                                                  |       | 28   | 939  | 991   |
|    | GO:  |                                                                  | 32/   | 0.33 | 0.16 |       |
| BP | 0061 | negative regulation of heart growth                              | 1/292 | 233  | 191  | 881 1 |
|    | 117  |                                                                  |       | 28   | 939  | 991   |
|    | GO:  |                                                                  | 32/   | 0.33 | 0.16 |       |
| BP | 0070 | protein K63-linked deubiquitination                              | 1/292 | 233  | 191  | 881 1 |
|    | 536  |                                                                  |       | 28   | 939  | 991   |
|    | GO:  |                                                                  | 32/   | 0.33 | 0.16 |       |
| BP | 1901 | negative regulation of signal transduction by p53 class mediator | 1/292 | 233  | 191  | 881 1 |
|    | 797  |                                                                  |       | 28   | 939  | 991   |
|    | GO:  |                                                                  | 32/   | 0.33 | 0.16 |       |
| BP | 1903 | regulation of dendrite extension                                 | 1/292 | 233  | 191  | 881 1 |
|    | 859  |                                                                  |       | 28   | 939  | 991   |
|    | GO:  |                                                                  | 32/   | 0.33 | 0.16 |       |
| BP | 1905 | negative regulation of protein localization to membrane          | 1/292 | 233  | 191  | 881 1 |
|    | 476  |                                                                  |       | 28   | 939  | 991   |
|    | GO:  |                                                                  | 95/   | 0.33 | 0.16 |       |
| BP | 0055 | cardiac muscle cell development                                  | 2/292 | 233  | 399  | 983 2 |
|    | 013  |                                                                  |       | 28   | 969  | 117   |
|    | GO:  |                                                                  | 163   | 0.33 | 0.16 |       |
| BP | 0002 | hematopoietic progenitor cell differentiation                    | 3/292 | /23  | 431  | 994 3 |
|    | 244  |                                                                  |       | 328  | 964  | 703   |
|    | GO:  |                                                                  | 96/   | 0.33 | 0.17 |       |
| BP | 0061 | somite development                                               | 2/292 | 233  | 856  | 205 2 |
|    | 053  |                                                                  |       | 28   | 546  | 794   |
|    | GO:  |                                                                  | 33/   | 0.34 | 0.17 |       |
| BP | 0001 | natural killer cell differentiation                              | 1/292 | 233  | 029  | 241 1 |
|    | 779  |                                                                  |       | 28   | 334  | 372   |
|    | GO:  |                                                                  | 33/   | 0.34 | 0.17 |       |
| BP | 0007 | mating behavior                                                  | 1/292 | 233  | 029  | 241 1 |
|    | 617  |                                                                  |       | 28   | 334  | 372   |



|    |                                                                          |       |     |      |      |   |
|----|--------------------------------------------------------------------------|-------|-----|------|------|---|
|    | GO:                                                                      |       | 33/ | 0.34 | 0.17 |   |
| BP | 0022 circadian sleep/wake cycle process                                  | 1/292 | 233 | 029  | 241  | 1 |
|    | 410                                                                      |       | 28  | 334  | 372  |   |
|    | GO:                                                                      |       | 33/ | 0.34 | 0.17 |   |
| BP | 0033 regulation of T cell differentiation in thymus                      | 1/292 | 233 | 029  | 241  | 1 |
|    | 081                                                                      |       | 28  | 334  | 372  |   |
|    | GO:                                                                      |       | 33/ | 0.34 | 0.17 |   |
| BP | 0033 regulation of water loss via skin                                   | 1/292 | 233 | 029  | 241  | 1 |
|    | 561                                                                      |       | 28  | 334  | 372  |   |
|    | GO:                                                                      |       | 33/ | 0.34 | 0.17 |   |
| BP | 0045 regulation of megakaryocyte differentiation                         | 1/292 | 233 | 029  | 241  | 1 |
|    | 652                                                                      |       | 28  | 334  | 372  |   |
|    | GO:                                                                      |       | 33/ | 0.34 | 0.17 |   |
| BP | 0045 positive regulation of G protein-coupled receptor signaling pathway | 1/292 | 233 | 029  | 241  | 1 |
|    | 745                                                                      |       | 28  | 334  | 372  |   |
|    | GO:                                                                      |       | 33/ | 0.34 | 0.17 |   |
| BP | 0051 centrosome localization                                             | 1/292 | 233 | 029  | 241  | 1 |
|    | 642                                                                      |       | 28  | 334  | 372  |   |
|    | GO:                                                                      |       | 33/ | 0.34 | 0.17 |   |
| BP | 0060 lung epithelial cell differentiation                                | 1/292 | 233 | 029  | 241  | 1 |
|    | 487                                                                      |       | 28  | 334  | 372  |   |
|    | GO:                                                                      |       | 33/ | 0.34 | 0.17 |   |
| BP | 0060 heart formation                                                     | 1/292 | 233 | 029  | 241  | 1 |
|    | 914                                                                      |       | 28  | 334  | 372  |   |
|    | GO:                                                                      |       | 33/ | 0.34 | 0.17 |   |
| BP | 0072 pyridine-containing compound metabolic process                      | 1/292 | 233 | 029  | 241  | 1 |
|    | 524                                                                      |       | 28  | 334  | 372  |   |
|    | GO:                                                                      |       | 165 | 0.34 | 0.17 |   |
| BP | 0006 cellular modified amino acid metabolic process                      | 3/292 | /23 | 115  | 280  | 3 |
|    | 575                                                                      |       | 328 | 825  | 449  |   |
|    | GO:                                                                      |       | 236 | 0.34 | 0.17 |   |
| BP | 0045 negative regulation of mitotic cell cycle                           | 4/292 | /23 | 233  | 335  | 4 |
|    | 930                                                                      |       | 328 | 674  | 383  |   |
|    | GO:                                                                      |       | 97/ | 0.34 | 0.17 |   |
| BP | 1905 autophagosome organization                                          | 2/292 | 233 | 312  | 370  | 2 |
|    | 037                                                                      |       | 28  | 171  | 366  |   |
|    | GO:                                                                      |       | 166 | 0.34 | 0.17 |   |
| BP | 0098 import across plasma membrane                                       | 3/292 | /23 | 457  | 439  | 3 |
|    | 739                                                                      |       | 328 | 584  | 196  |   |
|    | GO:                                                                      |       | 98/ | 0.34 | 0.17 |   |
| BP | 1901 glycosyl compound metabolic process                                 | 2/292 | 233 | 766  | 583  | 2 |
|    | 657                                                                      |       | 28  | 795  | 102  |   |

|    |      |                                                          |       |      |      |       |
|----|------|----------------------------------------------------------|-------|------|------|-------|
|    | GO:  |                                                          | 34/   | 0.34 | 0.17 |       |
| BP | 0001 | startle response                                         | 1/292 | 233  | 856  | 583 1 |
|    | 964  |                                                          |       | 28   | 268  | 102   |
|    | GO:  |                                                          | 34/   | 0.34 | 0.17 |       |
| BP | 0006 | cell volume homeostasis                                  | 1/292 | 233  | 856  | 583 1 |
|    | 884  |                                                          |       | 28   | 268  | 102   |
|    | GO:  |                                                          | 34/   | 0.34 | 0.17 |       |
| BP | 0014 | Schwann cell development                                 | 1/292 | 233  | 856  | 583 1 |
|    | 044  |                                                          |       | 28   | 268  | 102   |
|    | GO:  |                                                          | 34/   | 0.34 | 0.17 |       |
| BP | 0014 | negative regulation of muscle hypertrophy                | 1/292 | 233  | 856  | 583 1 |
|    | 741  |                                                          |       | 28   | 268  | 102   |
|    | GO:  |                                                          | 34/   | 0.34 | 0.17 |       |
| BP | 0019 | antigen processing and presentation of exogenous antigen | 1/292 | 233  | 856  | 583 1 |
|    | 884  |                                                          |       | 28   | 268  | 102   |
|    | GO:  |                                                          | 34/   | 0.34 | 0.17 |       |
| BP | 0019 | cGMP-mediated signaling                                  | 1/292 | 233  | 856  | 583 1 |
|    | 934  |                                                          |       | 28   | 268  | 102   |
|    | GO:  |                                                          | 34/   | 0.34 | 0.17 |       |
| BP | 0044 | cellular carbohydrate catabolic process                  | 1/292 | 233  | 856  | 583 1 |
|    | 275  |                                                          |       | 28   | 268  | 102   |
|    | GO:  |                                                          | 34/   | 0.34 | 0.17 |       |
| BP | 0060 | lung cell differentiation                                | 1/292 | 233  | 856  | 583 1 |
|    | 479  |                                                          |       | 28   | 268  | 102   |
|    | GO:  |                                                          | 34/   | 0.34 | 0.17 |       |
| BP | 0061 | microtubule organizing center localization               | 1/292 | 233  | 856  | 583 1 |
|    | 842  |                                                          |       | 28   | 268  | 102   |
|    | GO:  |                                                          | 34/   | 0.34 | 0.17 |       |
| BP | 0090 | establishment of epithelial cell polarity                | 1/292 | 233  | 856  | 583 1 |
|    | 162  |                                                          |       | 28   | 268  | 102   |
|    | GO:  |                                                          | 34/   | 0.34 | 0.17 |       |
| BP | 0097 | autophagosome maturation                                 | 1/292 | 233  | 856  | 583 1 |
|    | 352  |                                                          |       | 28   | 268  | 102   |
|    | GO:  |                                                          | 99/   | 0.35 | 0.17 |       |
| BP | 0045 | maintenance of protein location                          | 2/292 | 233  | 220  | 761 2 |
|    | 185  |                                                          |       | 28   | 371  | 917   |
|    | GO:  |                                                          | 35/   | 0.35 | 0.17 |       |
| BP | 0002 | regulation of oxidative phosphorylation                  | 1/292 | 233  | 672  | 911 1 |
|    | 082  |                                                          |       | 28   | 872  | 792   |
|    | GO:  |                                                          | 35/   | 0.35 | 0.17 |       |
| BP | 0007 | negative regulation of microtubule depolymerization      | 1/292 | 233  | 672  | 911 1 |
|    | 026  |                                                          |       | 28   | 872  | 792   |

|    |      |                                                                              |       |      |      |     |   |
|----|------|------------------------------------------------------------------------------|-------|------|------|-----|---|
|    | GO:  |                                                                              | 35/   | 0.35 | 0.17 |     |   |
| BP | 0009 | cyclic nucleotide metabolic process                                          | 1/292 | 233  | 672  | 911 | 1 |
|    |      | 187                                                                          |       | 28   | 872  | 792 |   |
|    | GO:  |                                                                              | 35/   | 0.35 | 0.17 |     |   |
| BP | 0010 | negative regulation of epithelial to mesenchymal transition                  | 1/292 | 233  | 672  | 911 | 1 |
|    |      | 719                                                                          |       | 28   | 872  | 792 |   |
|    | GO:  |                                                                              | 35/   | 0.35 | 0.17 |     |   |
| BP | 0021 | cell proliferation in forebrain                                              | 1/292 | 233  | 672  | 911 | 1 |
|    |      | 846                                                                          |       | 28   | 872  | 792 |   |
|    | GO:  |                                                                              | 35/   | 0.35 | 0.17 |     |   |
| BP | 0032 | response to food                                                             | 1/292 | 233  | 672  | 911 | 1 |
|    |      | 094                                                                          |       | 28   | 872  | 792 |   |
|    | GO:  |                                                                              | 35/   | 0.35 | 0.17 |     |   |
| BP | 0034 | cell junction maintenance                                                    | 1/292 | 233  | 672  | 911 | 1 |
|    |      | 331                                                                          |       | 28   | 872  | 792 |   |
|    | GO:  |                                                                              | 35/   | 0.35 | 0.17 |     |   |
| BP | 0035 | negative regulation of protein dephosphorylation                             | 1/292 | 233  | 672  | 911 | 1 |
|    |      | 308                                                                          |       | 28   | 872  | 792 |   |
|    | GO:  |                                                                              | 35/   | 0.35 | 0.17 |     |   |
| BP | 0040 | establishment of mitotic spindle localization                                | 1/292 | 233  | 672  | 911 | 1 |
|    |      | 001                                                                          |       | 28   | 872  | 792 |   |
|    | GO:  |                                                                              | 35/   | 0.35 | 0.17 |     |   |
| BP | 0043 | regulation of DNA damage response, signal transduction by p53 class mediator | 1/292 | 233  | 672  | 911 | 1 |
|    |      | 516                                                                          |       | 28   | 872  | 792 |   |
|    | GO:  |                                                                              | 35/   | 0.35 | 0.17 |     |   |
| BP | 0045 | negative regulation of glial cell differentiation                            | 1/292 | 233  | 672  | 911 | 1 |
|    |      | 686                                                                          |       | 28   | 872  | 792 |   |
|    | GO:  |                                                                              | 35/   | 0.35 | 0.17 |     |   |
| BP | 0045 | negative regulation of Notch signaling pathway                               | 1/292 | 233  | 672  | 911 | 1 |
|    |      | 746                                                                          |       | 28   | 872  | 792 |   |
|    | GO:  |                                                                              | 35/   | 0.35 | 0.17 |     |   |
| BP | 0060 | long-term synaptic depression                                                | 1/292 | 233  | 672  | 911 | 1 |
|    |      | 292                                                                          |       | 28   | 872  | 792 |   |
|    | GO:  |                                                                              | 35/   | 0.35 | 0.17 |     |   |
| BP | 0071 | cellular response to cAMP                                                    | 1/292 | 233  | 672  | 911 | 1 |
|    |      | 320                                                                          |       | 28   | 872  | 792 |   |
|    | GO:  |                                                                              | 35/   | 0.35 | 0.17 |     |   |
| BP | 0090 | regulation of protein targeting to membrane                                  | 1/292 | 233  | 672  | 911 | 1 |
|    |      | 313                                                                          |       | 28   | 872  | 792 |   |
|    | GO:  |                                                                              | 35/   | 0.35 | 0.17 |     |   |
| BP | 1900 | negative regulation of protein localization to nucleus                       | 1/292 | 233  | 672  | 911 | 1 |
|    |      | 181                                                                          |       | 28   | 872  | 792 |   |

|    |                                                                                      |       |     |      |      |   |
|----|--------------------------------------------------------------------------------------|-------|-----|------|------|---|
|    | GO:                                                                                  |       | 101 | 0.36 | 0.18 |   |
| BP | 0009 fatty acid catabolic process                                                    | 2/292 | /23 | 124  | 118  | 2 |
|    | 062                                                                                  |       | 328 | 205  | 691  |   |
|    | GO:                                                                                  |       | 101 | 0.36 | 0.18 |   |
| BP | 0031 positive regulation of histone modification                                     | 2/292 | /23 | 124  | 118  | 2 |
|    | 058                                                                                  |       | 328 | 205  | 691  |   |
|    | GO:                                                                                  |       | 101 | 0.36 | 0.18 |   |
| BP | 0055 cardiac cell development                                                        | 2/292 | /23 | 124  | 118  | 2 |
|    | 006                                                                                  |       | 328 | 205  | 691  |   |
|    | GO:                                                                                  |       | 101 | 0.36 | 0.18 |   |
| BP | 2000 positive regulation of ubiquitin-dependent protein catabolic process            | 2/292 | /23 | 124  | 118  | 2 |
|    | 060                                                                                  |       | 328 | 205  | 691  |   |
|    | GO:                                                                                  |       | 36/ | 0.36 | 0.18 |   |
| BP | 0007 female meiotic nuclear division                                                 | 1/292 | 233 | 479  | 247  | 1 |
|    | 143                                                                                  |       | 28  | 274  | 184  |   |
|    | GO:                                                                                  |       | 36/ | 0.36 | 0.18 |   |
| BP | 0009 nucleobase metabolic process                                                    | 1/292 | 233 | 479  | 247  | 1 |
|    | 112                                                                                  |       | 28  | 274  | 184  |   |
|    | GO:                                                                                  |       | 36/ | 0.36 | 0.18 |   |
| BP | 0032 negative regulation of actin filament bundle assembly                           | 1/292 | 233 | 479  | 247  | 1 |
|    | 232                                                                                  |       | 28  | 274  | 184  |   |
|    | GO:                                                                                  |       | 36/ | 0.36 | 0.18 |   |
| BP | 0033 nuclear DNA replication                                                         | 1/292 | 233 | 479  | 247  | 1 |
|    | 260                                                                                  |       | 28  | 274  | 184  |   |
|    | GO:                                                                                  |       | 36/ | 0.36 | 0.18 |   |
| BP | 0034 plasma lipoprotein particle clearance                                           | 1/292 | 233 | 479  | 247  | 1 |
|    | 381                                                                                  |       | 28  | 274  | 184  |   |
|    | GO:                                                                                  |       | 36/ | 0.36 | 0.18 |   |
| BP | 0050 RNA destabilization                                                             | 1/292 | 233 | 479  | 247  | 1 |
|    | 779                                                                                  |       | 28  | 274  | 184  |   |
|    | GO:                                                                                  |       | 36/ | 0.36 | 0.18 |   |
| BP | 0060 positive regulation of transcription initiation from RNA polymerase II promoter | 1/292 | 233 | 479  | 247  | 1 |
|    | 261                                                                                  |       | 28  | 274  | 184  |   |
|    | GO:                                                                                  |       | 36/ | 0.36 | 0.18 |   |
| BP | 0071 positive regulation of cell cycle arrest                                        | 1/292 | 233 | 479  | 247  | 1 |
|    | 158                                                                                  |       | 28  | 274  | 184  |   |
|    | GO:                                                                                  |       | 36/ | 0.36 | 0.18 |   |
| BP | 2000 negative regulation of dendrite development                                     | 1/292 | 233 | 479  | 247  | 1 |
|    | 171                                                                                  |       | 28  | 274  | 184  |   |
|    | GO:                                                                                  |       | 36/ | 0.36 | 0.18 |   |
| BP | 2000 regulation of autophagosome assembly                                            | 1/292 | 233 | 479  | 247  | 1 |
|    | 785                                                                                  |       | 28  | 274  | 184  |   |

|    |                                                          |       |     |      |      |   |
|----|----------------------------------------------------------|-------|-----|------|------|---|
|    | GO:                                                      |       | 172 | 0.36 | 0.18 |   |
| BP | 0008 phospholipid biosynthetic process                   | 3/292 | /23 | 504  | 249  | 3 |
|    | 654                                                      |       | 328 | 152  | 734  |   |
|    | GO:                                                      |       | 172 | 0.36 | 0.18 |   |
| BP | 0060 retina development in camera-type eye               | 3/292 | /23 | 504  | 249  | 3 |
|    | 041                                                      |       | 328 | 152  | 734  |   |
|    | GO:                                                      |       | 103 | 0.37 | 0.18 |   |
| BP | 0044 cellular polysaccharide metabolic process           | 2/292 | /23 | 023  | 504  | 2 |
|    | 264                                                      |       | 328 | 326  | 274  |   |
|    | GO:                                                      |       | 37/ | 0.37 | 0.18 |   |
| BP | 0002 response to ischemia                                | 1/292 | 233 | 275  | 564  | 1 |
|    | 931                                                      |       | 28  | 601  | 991  |   |
|    | GO:                                                      |       | 37/ | 0.37 | 0.18 |   |
| BP | 0009 aromatic amino acid family metabolic process        | 1/292 | 233 | 275  | 564  | 1 |
|    | 072                                                      |       | 28  | 601  | 991  |   |
|    | GO:                                                      |       | 37/ | 0.37 | 0.18 |   |
| BP | 0009 proximal/distal pattern formation                   | 1/292 | 233 | 275  | 564  | 1 |
|    | 954                                                      |       | 28  | 601  | 991  |   |
|    | GO:                                                      |       | 37/ | 0.37 | 0.18 |   |
| BP | 0030 collagen catabolic process                          | 1/292 | 233 | 275  | 564  | 1 |
|    | 574                                                      |       | 28  | 601  | 991  |   |
|    | GO:                                                      |       | 37/ | 0.37 | 0.18 |   |
| BP | 0030 cortical actin cytoskeleton organization            | 1/292 | 233 | 275  | 564  | 1 |
|    | 866                                                      |       | 28  | 601  | 991  |   |
|    | GO:                                                      |       | 37/ | 0.37 | 0.18 |   |
| BP | 0042 serine phosphorylation of STAT protein              | 1/292 | 233 | 275  | 564  | 1 |
|    | 501                                                      |       | 28  | 601  | 991  |   |
|    | GO:                                                      |       | 37/ | 0.37 | 0.18 |   |
| BP | 0045 protein targeting to ER                             | 1/292 | 233 | 275  | 564  | 1 |
|    | 047                                                      |       | 28  | 601  | 991  |   |
|    | GO:                                                      |       | 37/ | 0.37 | 0.18 |   |
| BP | 0051 establishment of spindle orientation                | 1/292 | 233 | 275  | 564  | 1 |
|    | 294                                                      |       | 28  | 601  | 991  |   |
|    | GO:                                                      |       | 37/ | 0.37 | 0.18 |   |
| BP | 0060 Wnt signaling pathway, planar cell polarity pathway | 1/292 | 233 | 275  | 564  | 1 |
|    | 071                                                      |       | 28  | 601  | 991  |   |
|    | GO:                                                      |       | 37/ | 0.37 | 0.18 |   |
| BP | 0070 regulation of glycogen metabolic process            | 1/292 | 233 | 275  | 564  | 1 |
|    | 873                                                      |       | 28  | 601  | 991  |   |
|    | GO:                                                      |       | 37/ | 0.37 | 0.18 |   |
| BP | 0098 bone cell development                               | 1/292 | 233 | 275  | 564  | 1 |
|    | 751                                                      |       | 28  | 601  | 991  |   |

|    |      |                                                                     |       |      |      |       |
|----|------|---------------------------------------------------------------------|-------|------|------|-------|
|    | GO:  |                                                                     | 37/   | 0.37 | 0.18 |       |
| BP | 1903 | negative regulation of reactive oxygen species biosynthetic process | 1/292 | 233  | 275  | 564 1 |
|    | 427  |                                                                     |       | 28   | 601  | 991   |
|    | GO:  |                                                                     | 37/   | 0.37 | 0.18 |       |
| BP | 1990 | cellular detoxification                                             | 1/292 | 233  | 275  | 564 1 |
|    | 748  |                                                                     |       | 28   | 601  | 991   |
|    | GO:  |                                                                     | 104   | 0.37 | 0.18 |       |
| BP | 0052 | movement in host environment                                        | 2/292 | /23  | 471  | 652 2 |
|    | 126  |                                                                     |       | 328  | 018  | 25    |
|    | GO:  |                                                                     | 104   | 0.37 | 0.18 |       |
| BP | 1902 | negative regulation of leukocyte differentiation                    | 2/292 | /23  | 471  | 652 2 |
|    | 106  |                                                                     |       | 328  | 018  | 25    |
|    | GO:  |                                                                     | 38/   | 0.38 | 0.18 |       |
| BP | 0019 | triglyceride biosynthetic process                                   | 1/292 | 233  | 061  | 920 1 |
|    | 432  |                                                                     |       | 28   | 979  | 896   |
|    | GO:  |                                                                     | 38/   | 0.38 | 0.18 |       |
| BP | 0031 | regulation of microtubule depolymerization                          | 1/292 | 233  | 061  | 920 1 |
|    | 114  |                                                                     |       | 28   | 979  | 896   |
|    | GO:  |                                                                     | 38/   | 0.38 | 0.18 |       |
| BP | 0033 | regulation of cellular amine metabolic process                      | 1/292 | 233  | 061  | 920 1 |
|    | 238  |                                                                     |       | 28   | 979  | 896   |
|    | GO:  |                                                                     | 38/   | 0.38 | 0.18 |       |
| BP | 0043 | negative regulation of potassium ion transport                      | 1/292 | 233  | 061  | 920 1 |
|    | 267  |                                                                     |       | 28   | 979  | 896   |
|    | GO:  |                                                                     | 38/   | 0.38 | 0.18 |       |
| BP | 0071 | cellular response to estrogen stimulus                              | 1/292 | 233  | 061  | 920 1 |
|    | 391  |                                                                     |       | 28   | 979  | 896   |
|    | GO:  |                                                                     | 324   | 0.38 | 0.18 |       |
| BP | 0016 | lipid catabolic process                                             | 5/292 | /23  | 213  | 991 5 |
|    | 042  |                                                                     |       | 328  | 767  | 235   |
|    | GO:  |                                                                     | 106   | 0.38 | 0.19 |       |
| BP | 0043 | pigmentation                                                        | 2/292 | /23  | 362  | 060 2 |
|    | 473  |                                                                     |       | 328  | 47   | 003   |
|    | GO:  |                                                                     | 39/   | 0.38 | 0.19 |       |
| BP | 0006 | porphyrin-containing compound metabolic process                     | 1/292 | 233  | 838  | 260 1 |
|    | 778  |                                                                     |       | 28   | 531  | 229   |
|    | GO:  |                                                                     | 39/   | 0.38 | 0.19 |       |
| BP | 0009 | response to salt stress                                             | 1/292 | 233  | 838  | 260 1 |
|    | 651  |                                                                     |       | 28   | 531  | 229   |
|    | GO:  |                                                                     | 39/   | 0.38 | 0.19 |       |
| BP | 0031 | regulation of cyclase activity                                      | 1/292 | 233  | 838  | 260 1 |
|    | 279  |                                                                     |       | 28   | 531  | 229   |

|    |      |                                                              |       |      |      |       |
|----|------|--------------------------------------------------------------|-------|------|------|-------|
|    | GO:  |                                                              | 39/   | 0.38 | 0.19 |       |
| BP | 0042 | cellular modified amino acid biosynthetic process            | 1/292 | 233  | 838  | 260 1 |
|    | 398  |                                                              |       | 28   | 531  | 229   |
|    | GO:  |                                                              | 39/   | 0.38 | 0.19 |       |
| BP | 0046 | regulation of fatty acid oxidation                           | 1/292 | 233  | 838  | 260 1 |
|    | 320  |                                                              |       | 28   | 531  | 229   |
|    | GO:  |                                                              | 39/   | 0.38 | 0.19 |       |
| BP | 1900 | positive regulation of G1/S transition of mitotic cell cycle | 1/292 | 233  | 838  | 260 1 |
|    | 087  |                                                              |       | 28   | 531  | 229   |
|    | GO:  |                                                              | 39/   | 0.38 | 0.19 |       |
| BP | 1901 | regulation of voltage-gated calcium channel activity         | 1/292 | 233  | 838  | 260 1 |
|    | 385  |                                                              |       | 28   | 531  | 229   |
|    | GO:  |                                                              | 180   | 0.39 | 0.19 |       |
| BP | 0003 | cilium movement                                              | 3/292 | /23  | 215  | 432 3 |
|    | 341  |                                                              |       | 328  | 674  | 168   |
|    | GO:  |                                                              | 180   | 0.39 | 0.19 |       |
| BP | 1901 | alpha-amino acid metabolic process                           | 3/292 | /23  | 215  | 432 3 |
|    | 605  |                                                              |       | 328  | 674  | 168   |
|    | GO:  |                                                              | 108   | 0.39 | 0.19 |       |
| BP | 0006 | oxidative phosphorylation                                    | 2/292 | /23  | 248  | 432 2 |
|    | 119  |                                                              |       | 328  | 434  | 168   |
|    | GO:  |                                                              | 108   | 0.39 | 0.19 |       |
| BP | 0021 | cerebral cortex development                                  | 2/292 | /23  | 248  | 432 2 |
|    | 987  |                                                              |       | 328  | 434  | 168   |
|    | GO:  |                                                              | 108   | 0.39 | 0.19 |       |
| BP | 0034 | cellular hormone metabolic process                           | 2/292 | /23  | 248  | 432 2 |
|    | 754  |                                                              |       | 328  | 434  | 168   |
|    | GO:  |                                                              | 108   | 0.39 | 0.19 |       |
| BP | 0048 | embryonic skeletal system morphogenesis                      | 2/292 | /23  | 248  | 432 2 |
|    | 704  |                                                              |       | 328  | 434  | 168   |
|    | GO:  |                                                              | 254   | 0.39 | 0.19 |       |
| BP | 1903 | regulation of cellular protein catabolic process             | 4/292 | /23  | 333  | 469 4 |
|    | 362  |                                                              |       | 328  | 471  | 046   |
|    | GO:  |                                                              | 40/   | 0.39 | 0.19 |       |
| BP | 0000 | embryonic axis specification                                 | 1/292 | 233  | 605  | 545 1 |
|    | 578  |                                                              |       | 28   | 38   | 961   |
|    | GO:  |                                                              | 40/   | 0.39 | 0.19 |       |
| BP | 0001 | blastocyst hatching                                          | 1/292 | 233  | 605  | 545 1 |
|    | 835  |                                                              |       | 28   | 38   | 961   |
|    | GO:  |                                                              | 40/   | 0.39 | 0.19 |       |
| BP | 0003 | skeletal muscle contraction                                  | 1/292 | 233  | 605  | 545 1 |
|    | 009  |                                                              |       | 28   | 38   | 961   |

|    |                                                                               |       |     |      |      |   |  |
|----|-------------------------------------------------------------------------------|-------|-----|------|------|---|--|
|    | GO:                                                                           |       | 40/ | 0.39 | 0.19 |   |  |
| BP | 0006 ER-nucleus signaling pathway                                             | 1/292 | 233 | 605  | 545  | 1 |  |
|    | 984                                                                           |       | 28  | 38   | 961  |   |  |
|    | GO:                                                                           |       | 40/ | 0.39 | 0.19 |   |  |
| BP | 0031 embryonic camera-type eye development                                    | 1/292 | 233 | 605  | 545  | 1 |  |
|    | 076                                                                           |       | 28  | 38   | 961  |   |  |
|    | GO:                                                                           |       | 40/ | 0.39 | 0.19 |   |  |
| BP | 0035 hatching                                                                 | 1/292 | 233 | 605  | 545  | 1 |  |
|    | 188                                                                           |       | 28  | 38   | 961  |   |  |
|    | GO:                                                                           |       | 40/ | 0.39 | 0.19 |   |  |
| BP | 0035 positive regulation of protein<br>dephosphorylation                      | 1/292 | 233 | 605  | 545  | 1 |  |
|    | 307                                                                           |       | 28  | 38   | 961  |   |  |
|    | GO:                                                                           |       | 40/ | 0.39 | 0.19 |   |  |
| BP | 0048 positive regulation of behavior                                          | 1/292 | 233 | 605  | 545  | 1 |  |
|    | 520                                                                           |       | 28  | 38   | 961  |   |  |
|    | GO:                                                                           |       | 40/ | 0.39 | 0.19 |   |  |
| BP | 0071 organism emergence from protective<br>structure                          | 1/292 | 233 | 605  | 545  | 1 |  |
|    | 684                                                                           |       | 28  | 38   | 961  |   |  |
|    | GO:                                                                           |       | 40/ | 0.39 | 0.19 |   |  |
| BP | 0090 regulation of establishment of planar polarity                           | 1/292 | 233 | 605  | 545  | 1 |  |
|    | 175                                                                           |       | 28  | 38   | 961  |   |  |
|    | GO:                                                                           |       | 40/ | 0.39 | 0.19 |   |  |
| BP | 1901 positive regulation of calcium ion<br>transmembrane transporter activity | 1/292 | 233 | 605  | 545  | 1 |  |
|    | 021                                                                           |       | 28  | 38   | 961  |   |  |
|    | GO:                                                                           |       | 109 | 0.39 | 0.19 |   |  |
| BP | 1900 positive regulation of dendrite development                              | 2/292 | /23 | 689  | 576  | 2 |  |
|    | 006                                                                           |       | 328 | 271  | 891  |   |  |
|    | GO:                                                                           |       | 109 | 0.39 | 0.19 |   |  |
| BP | 1901 positive regulation of proteasomal protein<br>catabolic process          | 2/292 | /23 | 689  | 576  | 2 |  |
|    | 800                                                                           |       | 328 | 271  | 891  |   |  |
|    | GO:                                                                           |       | 110 | 0.40 | 0.19 |   |  |
| BP | 2001 positive regulation of response to DNA<br>damage stimulus                | 2/292 | /23 | 128  | 788  | 2 |  |
|    | 022                                                                           |       | 328 | 632  | 318  |   |  |
|    | GO:                                                                           |       | 183 | 0.40 | 0.19 |   |  |
| BP | 0000 G1/S transition of mitotic cell cycle                                    | 3/292 | /23 | 225  | 830  | 3 |  |
|    | 082                                                                           |       | 328 | 345  | 71   |   |  |
|    | GO:                                                                           |       | 41/ | 0.40 | 0.19 |   |  |
| BP | 0044 cell cycle DNA replication                                               | 1/292 | 233 | 362  | 871  | 1 |  |
|    | 786                                                                           |       | 28  | 647  | 853  |   |  |
|    | GO:                                                                           |       | 41/ | 0.40 | 0.19 |   |  |
| BP | 0046 alcohol catabolic process                                                | 1/292 | 233 | 362  | 871  | 1 |  |
|    | 164                                                                           |       | 28  | 647  | 853  |   |  |



|    |      |                                                                        |       |     |      |      |   |
|----|------|------------------------------------------------------------------------|-------|-----|------|------|---|
|    | GO:  |                                                                        |       | 41/ | 0.40 | 0.19 |   |
| BP | 0060 | regulation of transcription initiation from RNA polymerase II promoter | 1/292 | 233 | 362  | 871  | 1 |
|    | 260  |                                                                        |       | 28  | 647  | 853  |   |
|    | GO:  |                                                                        |       | 41/ | 0.40 | 0.19 |   |
| BP | 0072 | maintenance of protein localization in organelle                       | 1/292 | 233 | 362  | 871  | 1 |
|    | 595  |                                                                        |       | 28  | 647  | 853  |   |
|    | GO:  |                                                                        |       | 41/ | 0.40 | 0.19 |   |
| BP | 0072 | establishment of protein localization to endoplasmic reticulum         | 1/292 | 233 | 362  | 871  | 1 |
|    | 599  |                                                                        |       | 28  | 647  | 853  |   |
|    | GO:  |                                                                        |       | 112 | 0.41 | 0.20 |   |
| BP | 0051 | spindle assembly                                                       | 2/292 | 723 | 002  | 181  | 2 |
|    | 225  |                                                                        |       | 328 | 801  | 637  |   |
|    | GO:  |                                                                        |       | 42/ | 0.41 | 0.20 |   |
| BP | 0051 | regulation of lyase activity                                           | 1/292 | 233 | 110  | 218  | 1 |
|    | 339  |                                                                        |       | 28  | 451  | 444  |   |
|    | GO:  |                                                                        |       | 42/ | 0.41 | 0.20 |   |
| BP | 2000 | negative regulation of DNA biosynthetic process                        | 1/292 | 233 | 110  | 218  | 1 |
|    | 279  |                                                                        |       | 28  | 451  | 444  |   |
|    | GO:  |                                                                        |       | 42/ | 0.41 | 0.20 |   |
| BP | 2000 | regulation of cellular senescence                                      | 1/292 | 233 | 110  | 218  | 1 |
|    | 772  |                                                                        |       | 28  | 451  | 444  |   |
|    | GO:  |                                                                        |       | 43/ | 0.41 | 0.20 |   |
| BP | 0014 | oligodendrocyte development                                            | 1/292 | 233 | 848  | 543  | 1 |
|    | 003  |                                                                        |       | 28  | 909  | 296  |   |
|    | GO:  |                                                                        |       | 43/ | 0.41 | 0.20 |   |
| BP | 0032 | positive regulation of TOR signaling                                   | 1/292 | 233 | 848  | 543  | 1 |
|    | 008  |                                                                        |       | 28  | 909  | 296  |   |
|    | GO:  |                                                                        |       | 43/ | 0.41 | 0.20 |   |
| BP | 0045 | establishment or maintenance of epithelial cell apical/basal polarity  | 1/292 | 233 | 848  | 543  | 1 |
|    | 197  |                                                                        |       | 28  | 909  | 296  |   |
|    | GO:  |                                                                        |       | 43/ | 0.41 | 0.20 |   |
| BP | 0045 | positive regulation of smoothed signaling pathway                      | 1/292 | 233 | 848  | 543  | 1 |
|    | 880  |                                                                        |       | 28  | 909  | 296  |   |
|    | GO:  |                                                                        |       | 43/ | 0.41 | 0.20 |   |
| BP | 0046 | regulation of viral transcription                                      | 1/292 | 233 | 848  | 543  | 1 |
|    | 782  |                                                                        |       | 28  | 909  | 296  |   |
|    | GO:  |                                                                        |       | 43/ | 0.41 | 0.20 |   |
| BP | 0055 | negative regulation of cardiac muscle tissue development               | 1/292 | 233 | 848  | 543  | 1 |
|    | 026  |                                                                        |       | 28  | 909  | 296  |   |
|    | GO:  |                                                                        |       | 43/ | 0.41 | 0.20 |   |
| BP | 2001 | negative regulation of cation channel activity                         | 1/292 | 233 | 848  | 543  | 1 |
|    | 258  |                                                                        |       | 28  | 909  | 296  |   |

|    |      |                                                                |       |      |      |      |   |
|----|------|----------------------------------------------------------------|-------|------|------|------|---|
|    | GO:  |                                                                | 114   | 0.41 | 0.20 |      |   |
| BP | 0010 | cellular component assembly involved in morphogenesis          | 2/292 | /23  | 870  | 548  | 2 |
|    | 927  |                                                                |       | 328  | 698  | 525  |   |
|    | GO:  |                                                                |       | 189  | 0.42 | 0.20 |   |
| BP | 0007 | neurotransmitter secretion                                     | 3/292 | /23  | 229  | 713  | 3 |
|    | 269  |                                                                |       | 328  | 888  | 784  |   |
|    | GO:  |                                                                |       | 189  | 0.42 | 0.20 |   |
| BP | 0099 | signal release from synapse                                    | 3/292 | /23  | 229  | 713  | 3 |
|    | 643  |                                                                |       | 328  | 888  | 784  |   |
|    | GO:  |                                                                |       | 44/  | 0.42 | 0.20 |   |
| BP | 0014 | myotube cell development                                       | 1/292 | 233  | 578  | 856  | 1 |
|    | 904  |                                                                |       | 28   | 139  | 881  |   |
|    | GO:  |                                                                |       | 44/  | 0.42 | 0.20 |   |
| BP | 0043 | skeletal muscle tissue regeneration                            | 1/292 | 233  | 578  | 856  | 1 |
|    | 403  |                                                                |       | 28   | 139  | 881  |   |
|    | GO:  |                                                                |       | 44/  | 0.42 | 0.20 |   |
| BP | 0046 | negative regulation of organ growth                            | 1/292 | 233  | 578  | 856  | 1 |
|    | 621  |                                                                |       | 28   | 139  | 881  |   |
|    | GO:  |                                                                |       | 44/  | 0.42 | 0.20 |   |
| BP | 1901 | toxin transport                                                | 1/292 | 233  | 578  | 856  | 1 |
|    | 998  |                                                                |       | 28   | 139  | 881  |   |
|    | GO:  |                                                                |       | 44/  | 0.42 | 0.20 |   |
| BP | 2000 | positive regulation of DNA-templated transcription, initiation | 1/292 | 233  | 578  | 856  | 1 |
|    | 144  |                                                                |       | 28   | 139  | 881  |   |
|    | GO:  |                                                                |       | 116  | 0.42 | 0.20 |   |
| BP | 0007 | mitotic spindle organization                                   | 2/292 | /23  | 732  | 926  | 2 |
|    | 052  |                                                                |       | 328  | 092  | 739  |   |
|    | GO:  |                                                                |       | 420  | 0.42 | 0.21 |   |
| BP | 0010 | negative regulation of organelle organization                  | 6/292 | /23  | 974  | 039  | 6 |
|    | 639  |                                                                |       | 328  | 141  | 692  |   |
|    | GO:  |                                                                |       | 117  | 0.43 | 0.21 |   |
| BP | 0006 | protein targeting to membrane                                  | 2/292 | /23  | 160  | 119  | 2 |
|    | 612  |                                                                |       | 328  | 283  | 618  |   |
|    | GO:  |                                                                |       | 117  | 0.43 | 0.21 |   |
| BP | 1905 | positive regulation of chromatin organization                  | 2/292 | /23  | 160  | 119  | 2 |
|    | 269  |                                                                |       | 328  | 283  | 618  |   |
|    | GO:  |                                                                |       | 45/  | 0.43 | 0.21 |   |
| BP | 0021 | cerebellar cortex morphogenesis                                | 1/292 | 233  | 298  | 159  | 1 |
|    | 696  |                                                                |       | 28   | 255  | 077  |   |
|    | GO:  |                                                                |       | 45/  | 0.43 | 0.21 |   |
| BP | 0042 | cellular response to glucose starvation                        | 1/292 | 233  | 298  | 159  | 1 |
|    | 149  |                                                                |       | 28   | 255  | 077  |   |

|    |                                                  |       |     |      |      |   |
|----|--------------------------------------------------|-------|-----|------|------|---|
|    | GO:                                              |       | 45/ | 0.43 | 0.21 |   |
| BP | 0044 regulation of vacuole organization          | 1/292 | 233 | 298  | 159  | 1 |
|    | 088                                              |       | 28  | 255  | 077  |   |
|    | GO:                                              |       | 45/ | 0.43 | 0.21 |   |
| BP | 0051 establishment of spindle localization       | 1/292 | 233 | 298  | 159  | 1 |
|    | 293                                              |       | 28  | 255  | 077  |   |
|    | GO:                                              |       | 45/ | 0.43 | 0.21 |   |
| BP | 0097 ruffle assembly                             | 1/292 | 233 | 298  | 159  | 1 |
|    | 178                                              |       | 28  | 255  | 077  |   |
|    | GO:                                              |       | 46/ | 0.44 | 0.21 |   |
| BP | 0006 cellular biogenic amine metabolic process   | 1/292 | 233 | 009  | 478  | 1 |
|    | 576                                              |       | 28  | 371  | 146  |   |
|    | GO:                                              |       | 46/ | 0.44 | 0.21 |   |
| BP | 0010 multicellular organism aging                | 1/292 | 233 | 009  | 478  | 1 |
|    | 259                                              |       | 28  | 371  | 146  |   |
|    | GO:                                              |       | 46/ | 0.44 | 0.21 |   |
| BP | 0019 viral transcription                         | 1/292 | 233 | 009  | 478  | 1 |
|    | 083                                              |       | 28  | 371  | 146  |   |
|    | GO:                                              |       | 46/ | 0.44 | 0.21 |   |
| BP | 0019 neuronal action potential                   | 1/292 | 233 | 009  | 478  | 1 |
|    | 228                                              |       | 28  | 371  | 146  |   |
|    | GO:                                              |       | 46/ | 0.44 | 0.21 |   |
| BP | 0043 regulation of transcription from RNA        | 1/292 | 233 | 009  | 478  | 1 |
|    | 618 polymerase II promoter in response to stress |       | 28  | 371  | 146  |   |
|    | GO:                                              |       | 427 | 0.44 | 0.21 |   |
| BP | 0090 organophosphate biosynthetic process        | 6/292 | /23 | 522  | 722  | 6 |
|    | 407                                              |       | 328 | 282  | 72   |   |
|    | GO:                                              |       | 273 | 0.44 | 0.21 |   |
| BP | 0009 glycoprotein biosynthetic process           | 4/292 | /23 | 648  | 763  | 4 |
|    | 101                                              |       | 328 | 989  | 299  |   |
|    | GO:                                              |       | 47/ | 0.44 | 0.21 |   |
| BP | 0001 postsynaptic membrane organization          | 1/292 | 233 | 711  | 763  | 1 |
|    | 941                                              |       | 28  | 599  | 299  |   |
|    | GO:                                              |       | 47/ | 0.44 | 0.21 |   |
| BP | 0030 intracellular estrogen receptor signaling   | 1/292 | 233 | 711  | 763  | 1 |
|    | 520 pathway                                      |       | 28  | 599  | 299  |   |
|    | GO:                                              |       | 47/ | 0.44 | 0.21 |   |
| BP | 0033 tetrapyrrole metabolic process              | 1/292 | 233 | 711  | 763  | 1 |
|    | 013                                              |       | 28  | 599  | 299  |   |
|    | GO:                                              |       | 47/ | 0.44 | 0.21 |   |
| BP | 0045 phospholipid translocation                  | 1/292 | 233 | 711  | 763  | 1 |
|    | 332                                              |       | 28  | 599  | 299  |   |

|    |                                                                                  |       |     |      |      |   |
|----|----------------------------------------------------------------------------------|-------|-----|------|------|---|
|    | GO:                                                                              |       | 47/ | 0.44 | 0.21 |   |
| BP | 0045 negative regulation of T cell differentiation                               | 1/292 | 233 | 711  | 763  | 1 |
|    | 581                                                                              |       | 28  | 599  | 299  |   |
|    | GO:                                                                              |       | 47/ | 0.44 | 0.21 |   |
| BP | 0046 neutral lipid biosynthetic process                                          | 1/292 | 233 | 711  | 763  | 1 |
|    | 460                                                                              |       | 28  | 599  | 299  |   |
|    | GO:                                                                              |       | 47/ | 0.44 | 0.21 |   |
| BP | 0046 acylglycerol biosynthetic process                                           | 1/292 | 233 | 711  | 763  | 1 |
|    | 463                                                                              |       | 28  | 599  | 299  |   |
|    | GO:                                                                              |       | 47/ | 0.44 | 0.21 |   |
| BP | 0072 establishment of protein localization to vacuole                            | 1/292 | 233 | 711  | 763  | 1 |
|    | 666                                                                              |       | 28  | 599  | 299  |   |
|    | GO:                                                                              |       | 121 | 0.44 | 0.21 |   |
| BP | 0072 monocarboxylic acid catabolic process                                       | 2/292 | /23 | 855  | 826  | 2 |
|    | 329                                                                              |       | 328 | 761  | 992  |   |
|    | GO:                                                                              |       | 197 | 0.44 | 0.21 |   |
| BP | 0050 regulation of dendrite development                                          | 3/292 | /23 | 866  | 826  | 3 |
|    | 773                                                                              |       | 328 | 111  | 992  |   |
|    | GO:                                                                              |       | 48/ | 0.45 | 0.22 |   |
| BP | 0003 epithelial cell morphogenesis                                               | 1/292 | 233 | 405  | 060  | 1 |
|    | 382                                                                              |       | 28  | 049  | 101  |   |
|    | GO:                                                                              |       | 48/ | 0.45 | 0.22 |   |
| BP | 0007 binding of sperm to zona pellucida                                          | 1/292 | 233 | 405  | 060  | 1 |
|    | 339                                                                              |       | 28  | 049  | 101  |   |
|    | GO:                                                                              |       | 48/ | 0.45 | 0.22 |   |
| BP | 0031 negative regulation of microtubule polymerization or depolymerization       | 1/292 | 233 | 405  | 060  | 1 |
|    | 111                                                                              |       | 28  | 049  | 101  |   |
|    | GO:                                                                              |       | 48/ | 0.45 | 0.22 |   |
| BP | 0070 platelet aggregation                                                        | 1/292 | 233 | 405  | 060  | 1 |
|    | 527                                                                              |       | 28  | 049  | 101  |   |
|    | GO:                                                                              |       | 48/ | 0.45 | 0.22 |   |
| BP | 0090 regulation of DNA-dependent DNA replication                                 | 1/292 | 233 | 405  | 060  | 1 |
|    | 329                                                                              |       | 28  | 049  | 101  |   |
|    | GO:                                                                              |       | 200 | 0.45 | 0.22 |   |
| BP | 0071 potassium ion transmembrane transport                                       | 3/292 | /23 | 842  | 266  | 3 |
|    | 805                                                                              |       | 328 | 371  | 712  |   |
|    | GO:                                                                              |       | 49/ | 0.46 | 0.22 |   |
| BP | 0007 heterophilic cell-cell adhesion via plasma membrane cell adhesion molecules | 1/292 | 233 | 089  | 360  | 1 |
|    | 157                                                                              |       | 28  | 831  | 7    |   |
|    | GO:                                                                              |       | 49/ | 0.46 | 0.22 |   |
| BP | 0014 striated muscle adaptation                                                  | 1/292 | 233 | 089  | 360  | 1 |
|    | 888                                                                              |       | 28  | 831  | 7    |   |

|    |                                                                                        |       |     |      |      |   |  |
|----|----------------------------------------------------------------------------------------|-------|-----|------|------|---|--|
|    | GO:                                                                                    |       | 49/ | 0.46 | 0.22 |   |  |
| BP | 0034 lipid translocation                                                               | 1/292 | 233 | 089  | 360  | 1 |  |
|    | 204                                                                                    |       | 28  | 831  | 7    |   |  |
|    | GO:                                                                                    |       | 49/ | 0.46 | 0.22 |   |  |
| BP | 1902 positive regulation of cell cycle G1/S phase transition                           | 1/292 | 233 | 089  | 360  | 1 |  |
|    | 808                                                                                    |       | 28  | 831  | 7    |   |  |
|    | GO:                                                                                    |       | 124 | 0.46 | 0.22 |   |  |
| BP | 1903 positive regulation of proteolysis involved in cellular protein catabolic process | 2/292 | /23 | 108  | 360  | 2 |  |
|    | 052                                                                                    |       | 328 | 58   | 7    |   |  |
|    | GO:                                                                                    |       | 124 | 0.46 | 0.22 |   |  |
| BP | 1905 carboxylic acid transmembrane transport                                           | 2/292 | /23 | 108  | 360  | 2 |  |
|    | 039                                                                                    |       | 328 | 58   | 7    |   |  |
|    | GO:                                                                                    |       | 201 | 0.46 | 0.22 |   |  |
| BP | 0044 cell cycle G1/S phase transition                                                  | 3/292 | /23 | 166  | 376  | 3 |  |
|    | 843                                                                                    |       | 328 | 175  | 869  |   |  |
|    | GO:                                                                                    |       | 201 | 0.46 | 0.22 |   |  |
| BP | 0070 regulation of microtubule cytoskeleton organization                               | 3/292 | /23 | 166  | 376  | 3 |  |
|    | 507                                                                                    |       | 328 | 175  | 869  |   |  |
|    | GO:                                                                                    |       | 279 | 0.46 | 0.22 |   |  |
| BP | 0016 gene silencing                                                                    | 4/292 | /23 | 299  | 435  | 4 |  |
|    | 458                                                                                    |       | 328 | 778  | 734  |   |  |
|    | GO:                                                                                    |       | 125 | 0.46 | 0.22 |   |  |
| BP | 1903 organic acid transmembrane transport                                              | 2/292 | /23 | 522  | 537  | 2 |  |
|    | 825                                                                                    |       | 328 | 497  | 739  |   |  |
|    | GO:                                                                                    |       | 50/ | 0.46 | 0.22 |   |  |
| BP | 0002 negative regulation of myeloid leukocyte differentiation                          | 1/292 | 233 | 766  | 620  | 1 |  |
|    | 762                                                                                    |       | 28  | 053  | 098  |   |  |
|    | GO:                                                                                    |       | 50/ | 0.46 | 0.22 |   |  |
| BP | 0007 male meiotic nuclear division                                                     | 1/292 | 233 | 766  | 620  | 1 |  |
|    | 140                                                                                    |       | 28  | 053  | 098  |   |  |
|    | GO:                                                                                    |       | 50/ | 0.46 | 0.22 |   |  |
| BP | 0043 negative regulation of DNA binding                                                | 1/292 | 233 | 766  | 620  | 1 |  |
|    | 392                                                                                    |       | 28  | 053  | 098  |   |  |
|    | GO:                                                                                    |       | 50/ | 0.46 | 0.22 |   |  |
| BP | 0046 purine ribonucleoside metabolic process                                           | 1/292 | 233 | 766  | 620  | 1 |  |
|    | 128                                                                                    |       | 28  | 053  | 098  |   |  |
|    | GO:                                                                                    |       | 50/ | 0.46 | 0.22 |   |  |
| BP | 0051 spindle localization                                                              | 1/292 | 233 | 766  | 620  | 1 |  |
|    | 653                                                                                    |       | 28  | 053  | 098  |   |  |
|    | GO:                                                                                    |       | 50/ | 0.46 | 0.22 |   |  |
| BP | 1903 negative regulation of response to endoplasmic reticulum stress                   | 1/292 | 233 | 766  | 620  | 1 |  |
|    | 573                                                                                    |       | 28  | 053  | 098  |   |  |

|    |      |                                              |       |      |      |       |
|----|------|----------------------------------------------|-------|------|------|-------|
|    | GO:  |                                              | 126   | 0.46 | 0.22 |       |
| BP | 0030 | actin filament-based movement                | 2/292 | /23  | 934  | 695 2 |
|    | 048  |                                              |       | 328  | 536  | 642   |
|    | GO:  |                                              |       | 51/  | 0.47 | 0.22  |
| BP | 0001 | positive regulation of T cell mediated       | 1/292 | 233  | 433  | 865 1 |
|    | 916  | cytotoxicity                                 |       | 28   | 821  | 173   |
|    | GO:  |                                              |       | 51/  | 0.47 | 0.22  |
| BP | 0002 | antigen processing and presentation of       | 1/292 | 233  | 433  | 865 1 |
|    | 474  | peptide antigen via MHC class I              |       | 28   | 821  | 173   |
|    | GO:  |                                              |       | 51/  | 0.47 | 0.22  |
| BP | 0031 | protein destabilization                      | 1/292 | 233  | 433  | 865 1 |
|    | 648  |                                              |       | 28   | 821  | 173   |
|    | GO:  |                                              |       | 51/  | 0.47 | 0.22  |
| BP | 0035 | establishment or maintenance of apical/basal | 1/292 | 233  | 433  | 865 1 |
|    | 088  | cell polarity                                |       | 28   | 821  | 173   |
|    | GO:  |                                              |       | 51/  | 0.47 | 0.22  |
| BP | 0046 | phosphatidylcholine metabolic process        | 1/292 | 233  | 433  | 865 1 |
|    | 470  |                                              |       | 28   | 821  | 173   |
|    | GO:  |                                              |       | 51/  | 0.47 | 0.22  |
| BP | 0051 | regulation of filopodium assembly            | 1/292 | 233  | 433  | 865 1 |
|    | 489  |                                              |       | 28   | 821  | 173   |
|    | GO:  |                                              |       | 51/  | 0.47 | 0.22  |
| BP | 0061 | establishment or maintenance of bipolar cell | 1/292 | 233  | 433  | 865 1 |
|    | 245  | polarity                                     |       | 28   | 821  | 173   |
|    | GO:  |                                              |       | 51/  | 0.47 | 0.22  |
| BP | 0071 | cellular response to osmotic stress          | 1/292 | 233  | 433  | 865 1 |
|    | 470  |                                              |       | 28   | 821  | 173   |
|    | GO:  |                                              |       | 51/  | 0.47 | 0.22  |
| BP | 0072 | pyrimidine-containing compound metabolic     | 1/292 | 233  | 433  | 865 1 |
|    | 527  | process                                      |       | 28   | 821  | 173   |
|    | GO:  |                                              |       | 51/  | 0.47 | 0.22  |
| BP | 0090 | regulation of protein deacetylation          | 1/292 | 233  | 433  | 865 1 |
|    | 311  |                                              |       | 28   | 821  | 173   |
|    | GO:  |                                              |       | 51/  | 0.47 | 0.22  |
| BP | 0098 | detoxification                               | 1/292 | 233  | 433  | 865 1 |
|    | 754  |                                              |       | 28   | 821  | 173   |
|    | GO:  |                                              |       | 51/  | 0.47 | 0.22  |
| BP | 2000 | regulation of DNA-templated transcription,   | 1/292 | 233  | 433  | 865 1 |
|    | 142  | initiation                                   |       | 28   | 821  | 173   |
|    | GO:  |                                              |       | 52/  | 0.48 | 0.23  |
| BP | 0030 | negative regulation of epithelial cell       | 1/292 | 233  | 093  | 170 1 |
|    | 857  | differentiation                              |       | 28   | 242  | 936   |

|    |      |                                             |       |      |      |     |
|----|------|---------------------------------------------|-------|------|------|-----|
|    | GO:  |                                             | 52/   | 0.48 | 0.23 |     |
| BP | 0065 | intracellular protein transmembrane         | 1/292 | 233  | 093  | 170 |
|    | 002  | transport                                   |       | 28   | 242  | 936 |
|    | GO:  |                                             | 130   | 0.48 | 0.23 |     |
| BP | 0008 | cholesterol metabolic process               | 2/292 | /23  | 563  | 385 |
|    | 203  |                                             |       | 328  | 575  | 328 |
|    | GO:  |                                             | 130   | 0.48 | 0.23 |     |
| BP | 0090 | nucleic acid phosphodiester bond hydrolysis | 2/292 | /23  | 563  | 385 |
|    | 305  |                                             |       | 328  | 575  | 328 |
|    | GO:  |                                             | 53/   | 0.48 | 0.23 |     |
| BP | 0001 | behavioral fear response                    | 1/292 | 233  | 744  | 435 |
|    | 662  |                                             |       | 28   | 418  | 716 |
|    | GO:  |                                             | 53/   | 0.48 | 0.23 |     |
| BP | 0030 | negative regulation of BMP signaling        | 1/292 | 233  | 744  | 435 |
|    | 514  | pathway                                     |       | 28   | 418  | 716 |
|    | GO:  |                                             | 53/   | 0.48 | 0.23 |     |
| BP | 0034 | cellular response to heat                   | 1/292 | 233  | 744  | 435 |
|    | 605  |                                             |       | 28   | 418  | 716 |
|    | GO:  |                                             | 53/   | 0.48 | 0.23 |     |
| BP | 0043 | regulation of phosphoprotein phosphatase    | 1/292 | 233  | 744  | 435 |
|    | 666  | activity                                    |       | 28   | 418  | 716 |
|    | GO:  |                                             | 53/   | 0.48 | 0.23 |     |
| BP | 0045 | negative regulation of mitotic nuclear      | 1/292 | 233  | 744  | 435 |
|    | 839  | division                                    |       | 28   | 418  | 716 |
|    | GO:  |                                             | 53/   | 0.48 | 0.23 |     |
| BP | 0046 | pigment biosynthetic process                | 1/292 | 233  | 744  | 435 |
|    | 148  |                                             |       | 28   | 418  | 716 |
|    | GO:  |                                             | 131   | 0.48 | 0.23 |     |
| BP | 0032 | regulation of proteasomal ubiquitin-        | 2/292 | /23  | 965  | 536 |
|    | 434  | dependent protein catabolic process         |       | 328  | 975  | 106 |
|    | GO:  |                                             | 132   | 0.49 | 0.23 |     |
| BP | 0099 | regulation of postsynapse organization      | 2/292 | /23  | 366  | 689 |
|    | 175  |                                             |       | 328  | 401  | 328 |
|    | GO:  |                                             | 54/   | 0.49 | 0.23 |     |
| BP | 0002 | behavioral defense response                 | 1/292 | 233  | 387  | 689 |
|    | 209  |                                             |       | 28   | 452  | 328 |
|    | GO:  |                                             | 54/   | 0.49 | 0.23 |     |
| BP | 0007 | microtubule depolymerization                | 1/292 | 233  | 387  | 689 |
|    | 019  |                                             |       | 28   | 452  | 328 |
|    | GO:  |                                             | 54/   | 0.49 | 0.23 |     |
| BP | 0010 | negative regulation of mitochondrion        | 1/292 | 233  | 387  | 689 |
|    | 823  | organization                                |       | 28   | 452  | 328 |

|    |                                                 |       |     |      |      |   |
|----|-------------------------------------------------|-------|-----|------|------|---|
|    | GO:                                             |       | 54/ | 0.49 | 0.23 |   |
| BP | 0014 negative regulation of gliogenesis         | 1/292 | 233 | 387  | 689  | 1 |
|    | 014                                             |       | 28  | 452  | 328  |   |
|    | GO:                                             |       | 54/ | 0.49 | 0.23 |   |
| BP | 0042 purine nucleoside metabolic process        | 1/292 | 233 | 387  | 689  | 1 |
|    | 278                                             |       | 28  | 452  | 328  |   |
|    | GO:                                             |       | 54/ | 0.49 | 0.23 |   |
| BP | 0071 protein transmembrane transport            | 1/292 | 233 | 387  | 689  | 1 |
|    | 806                                             |       | 28  | 452  | 328  |   |
|    | GO:                                             |       | 54/ | 0.49 | 0.23 |   |
| BP | 1900 regulation of long-term synaptic           | 1/292 | 233 | 387  | 689  | 1 |
|    | 271 potentiation                                |       | 28  | 452  | 328  |   |
|    | GO:                                             |       | 55/ | 0.50 | 0.23 |   |
| BP | 0006 ATP biosynthetic process                   | 1/292 | 233 | 022  | 944  | 1 |
|    | 754                                             |       | 28  | 447  | 119  |   |
|    | GO:                                             |       | 55/ | 0.50 | 0.23 |   |
| BP | 0009 anterior/posterior axis specification      | 1/292 | 233 | 022  | 944  | 1 |
|    | 948                                             |       | 28  | 447  | 119  |   |
|    | GO:                                             |       | 55/ | 0.50 | 0.23 |   |
| BP | 0031 ruffle organization                        | 1/292 | 233 | 022  | 944  | 1 |
|    | 529                                             |       | 28  | 447  | 119  |   |
|    | GO:                                             |       | 55/ | 0.50 | 0.23 |   |
| BP | 0035 sperm-egg recognition                      | 1/292 | 233 | 022  | 944  | 1 |
|    | 036                                             |       | 28  | 447  | 119  |   |
|    | GO:                                             |       | 55/ | 0.50 | 0.23 |   |
| BP | 0046 negative regulation of Ras protein signal  | 1/292 | 233 | 022  | 944  | 1 |
|    | 580 transduction                                |       | 28  | 447  | 119  |   |
|    | GO:                                             |       | 55/ | 0.50 | 0.23 |   |
| BP | 0050 multicellular organismal water homeostasis | 1/292 | 233 | 022  | 944  | 1 |
|    | 891                                             |       | 28  | 447  | 119  |   |
|    | GO:                                             |       | 55/ | 0.50 | 0.23 |   |
| BP | 0086 cardiac muscle cell action potential       | 1/292 | 233 | 022  | 944  | 1 |
|    | 001                                             |       | 28  | 447  | 119  |   |
|    | GO:                                             |       | 55/ | 0.50 | 0.23 |   |
| BP | 0097 regulation of membrane lipid distribution  | 1/292 | 233 | 022  | 944  | 1 |
|    | 035                                             |       | 28  | 447  | 119  |   |
|    | GO:                                             |       | 56/ | 0.50 | 0.24 |   |
| BP | 0009 ribonucleoside metabolic process           | 1/292 | 233 | 649  | 194  | 1 |
|    | 119                                             |       | 28  | 502  | 061  |   |
|    | GO:                                             |       | 56/ | 0.50 | 0.24 |   |
| BP | 0015 dopamine transport                         | 1/292 | 233 | 649  | 194  | 1 |
|    | 872                                             |       | 28  | 502  | 061  |   |



|    |                                                             |       |     |      |      |   |
|----|-------------------------------------------------------------|-------|-----|------|------|---|
|    | GO:                                                         |       | 56/ | 0.50 | 0.24 |   |
| BP | 0030 collagen fibril organization                           | 1/292 | 233 | 649  | 194  | 1 |
|    | 199                                                         |       | 28  | 502  | 061  |   |
|    | GO:                                                         |       | 56/ | 0.50 | 0.24 |   |
| BP | 0030 megakaryocyte differentiation                          | 1/292 | 233 | 649  | 194  | 1 |
|    | 219                                                         |       | 28  | 502  | 061  |   |
|    | GO:                                                         |       | 56/ | 0.50 | 0.24 |   |
| BP | 0042 hormone biosynthetic process                           | 1/292 | 233 | 649  | 194  | 1 |
|    | 446                                                         |       | 28  | 502  | 061  |   |
|    | GO:                                                         |       | 56/ | 0.50 | 0.24 |   |
| BP | 0045 negative regulation of lymphocyte differentiation      | 1/292 | 233 | 649  | 194  | 1 |
|    | 620                                                         |       | 28  | 502  | 061  |   |
|    | GO:                                                         |       | 56/ | 0.50 | 0.24 |   |
| BP | 0048 thymus development                                     | 1/292 | 233 | 649  | 194  | 1 |
|    | 538                                                         |       | 28  | 502  | 061  |   |
|    | GO:                                                         |       | 56/ | 0.50 | 0.24 |   |
| BP | 1903 regulation of protein targeting                        | 1/292 | 233 | 649  | 194  | 1 |
|    | 533                                                         |       | 28  | 502  | 061  |   |
|    | GO:                                                         |       | 376 | 0.50 | 0.24 |   |
| BP | 0044 mitotic cell cycle phase transition                    | 5/292 | /23 | 845  | 281  | 5 |
|    | 772                                                         |       | 328 | 366  | 336  |   |
|    | GO:                                                         |       | 217 | 0.51 | 0.24 |   |
| BP | 0006 mRNA catabolic process                                 | 3/292 | /23 | 224  | 445  | 3 |
|    | 402                                                         |       | 328 | 872  | 548  |   |
|    | GO:                                                         |       | 57/ | 0.51 | 0.24 |   |
| BP | 0019 secondary metabolic process                            | 1/292 | 233 | 268  | 445  | 1 |
|    | 748                                                         |       | 28  | 715  | 548  |   |
|    | GO:                                                         |       | 57/ | 0.51 | 0.24 |   |
| BP | 0035 non-canonical Wnt signaling pathway                    | 1/292 | 233 | 268  | 445  | 1 |
|    | 567                                                         |       | 28  | 715  | 548  |   |
|    | GO:                                                         |       | 57/ | 0.51 | 0.24 |   |
| BP | 0042 mitochondrial ATP synthesis coupled electron transport | 1/292 | 233 | 268  | 445  | 1 |
|    | 775                                                         |       | 28  | 715  | 548  |   |
|    | GO:                                                         |       | 57/ | 0.51 | 0.24 |   |
| BP | 0050 multicellular organismal movement                      | 1/292 | 233 | 268  | 445  | 1 |
|    | 879                                                         |       | 28  | 715  | 548  |   |
|    | GO:                                                         |       | 57/ | 0.51 | 0.24 |   |
| BP | 0050 musculoskeletal movement                               | 1/292 | 233 | 268  | 445  | 1 |
|    | 881                                                         |       | 28  | 715  | 548  |   |
|    | GO:                                                         |       | 58/ | 0.51 | 0.24 |   |
| BP | 0001 establishment of planar polarity                       | 1/292 | 233 | 880  | 698  | 1 |
|    | 736                                                         |       | 28  | 186  | 812  |   |

|    |                                                           |       |     |      |      |   |
|----|-----------------------------------------------------------|-------|-----|------|------|---|
|    | GO:                                                       |       | 58/ | 0.51 | 0.24 |   |
| BP | 0006 protein O-linked glycosylation                       | 1/292 | 233 | 880  | 698  | 1 |
|    | 493                                                       |       | 28  | 186  | 812  |   |
|    | GO:                                                       |       | 58/ | 0.51 | 0.24 |   |
| BP | 0010 negative regulation of muscle cell apoptotic process | 1/292 | 233 | 880  | 698  | 1 |
|    | 656                                                       |       | 28  | 186  | 812  |   |
|    | GO:                                                       |       | 58/ | 0.51 | 0.24 |   |
| BP | 0035 somatic stem cell population maintenance             | 1/292 | 233 | 880  | 698  | 1 |
|    | 019                                                       |       | 28  | 186  | 812  |   |
|    | GO:                                                       |       | 58/ | 0.51 | 0.24 |   |
| BP | 0042 fear response                                        | 1/292 | 233 | 880  | 698  | 1 |
|    | 596                                                       |       | 28  | 186  | 812  |   |
|    | GO:                                                       |       | 58/ | 0.51 | 0.24 |   |
| BP | 0099 presynapse organization                              | 1/292 | 233 | 880  | 698  | 1 |
|    | 172                                                       |       | 28  | 186  | 812  |   |
|    | GO:                                                       |       | 139 | 0.52 | 0.24 |   |
| BP | 0016 sterol metabolic process                             | 2/292 | /23 | 113  | 803  | 2 |
|    | 125                                                       |       | 328 | 034  | 266  |   |
|    | GO:                                                       |       | 382 | 0.52 | 0.24 |   |
| BP | 0051 establishment of organelle localization              | 5/292 | /23 | 244  | 859  | 5 |
|    | 656                                                       |       | 328 | 401  | 378  |   |
|    | GO:                                                       |       | 60/ | 0.53 | 0.25 |   |
| BP | 1901 organic hydroxy compound catabolic process           | 1/292 | 233 | 080  | 250  | 1 |
|    | 616                                                       |       | 28  | 283  | 603  |   |
|    | GO:                                                       |       | 306 | 0.53 | 0.25 |   |
| BP | 0016 dendrite development                                 | 4/292 | /23 | 485  | 436  | 4 |
|    | 358                                                       |       | 328 | 18   | 658  |   |
|    | GO:                                                       |       | 143 | 0.53 | 0.25 |   |
| BP | 0035 sodium ion transmembrane transport                   | 2/292 | /23 | 637  | 497  | 2 |
|    | 725                                                       |       | 328 | 315  | 84   |   |
|    | GO:                                                       |       | 61/ | 0.53 | 0.25 |   |
| BP | 0006 regulation of translational initiation               | 1/292 | 233 | 669  | 497  | 1 |
|    | 446                                                       |       | 28  | 098  | 84   |   |
|    | GO:                                                       |       | 61/ | 0.53 | 0.25 |   |
| BP | 0042 ATP synthesis coupled electron transport             | 1/292 | 233 | 669  | 497  | 1 |
|    | 773                                                       |       | 28  | 098  | 84   |   |
|    | GO:                                                       |       | 61/ | 0.53 | 0.25 |   |
| BP | 1902 regulation of cilium assembly                        | 1/292 | 233 | 669  | 497  | 1 |
|    | 017                                                       |       | 28  | 098  | 84   |   |
|    | GO:                                                       |       | 144 | 0.54 | 0.25 |   |
| BP | 0043 cellular protein complex disassembly                 | 2/292 | /23 | 013  | 654  | 2 |
|    | 624                                                       |       | 328 | 156  | 694  |   |

|    |                                                                       |       |     |      |      |   |
|----|-----------------------------------------------------------------------|-------|-----|------|------|---|
|    | GO:                                                                   |       | 62/ | 0.54 | 0.25 |   |
| BP | 0006 cellular aldehyde metabolic process                              | 1/292 | 233 | 250  | 690  | 1 |
|    | 081                                                                   |       | 28  | 549  | 868  |   |
|    | GO:                                                                   |       | 62/ | 0.54 | 0.25 |   |
| BP | 0015 organic cation transport                                         | 1/292 | 233 | 250  | 690  | 1 |
|    | 695                                                                   |       | 28  | 549  | 868  |   |
|    | GO:                                                                   |       | 62/ | 0.54 | 0.25 |   |
| BP | 0019 viral gene expression                                            | 1/292 | 233 | 250  | 690  | 1 |
|    | 080                                                                   |       | 28  | 549  | 868  |   |
|    | GO:                                                                   |       | 62/ | 0.54 | 0.25 |   |
| BP | 0030 cortical cytoskeleton organization                               | 1/292 | 233 | 250  | 690  | 1 |
|    | 865                                                                   |       | 28  | 549  | 868  |   |
|    | GO:                                                                   |       | 62/ | 0.54 | 0.25 |   |
| BP | 0032 glomerulus development                                           | 1/292 | 233 | 250  | 690  | 1 |
|    | 835                                                                   |       | 28  | 549  | 868  |   |
|    | GO:                                                                   |       | 62/ | 0.54 | 0.25 |   |
| BP | 0043 histone H3 acetylation                                           | 1/292 | 233 | 250  | 690  | 1 |
|    | 966                                                                   |       | 28  | 549  | 868  |   |
|    | GO:                                                                   |       | 62/ | 0.54 | 0.25 |   |
| BP | 0046 ceramide biosynthetic process                                    | 1/292 | 233 | 250  | 690  | 1 |
|    | 513                                                                   |       | 28  | 549  | 868  |   |
|    | GO:                                                                   |       | 62/ | 0.54 | 0.25 |   |
| BP | 0051 negative regulation of small GTPase mediated signal transduction | 1/292 | 233 | 250  | 690  | 1 |
|    | 058                                                                   |       | 28  | 549  | 868  |   |
|    | GO:                                                                   |       | 62/ | 0.54 | 0.25 |   |
| BP | 0061 cardiac conduction                                               | 1/292 | 233 | 250  | 690  | 1 |
|    | 337                                                                   |       | 28  | 549  | 868  |   |
|    | GO:                                                                   |       | 62/ | 0.54 | 0.25 |   |
| BP | 0072 protein localization to vacuole                                  | 1/292 | 233 | 250  | 690  | 1 |
|    | 665                                                                   |       | 28  | 549  | 868  |   |
|    | GO:                                                                   |       | 62/ | 0.54 | 0.25 |   |
| BP | 1903 positive regulation of protein localization to plasma membrane   | 1/292 | 233 | 250  | 690  | 1 |
|    | 078                                                                   |       | 28  | 549  | 868  |   |
|    | GO:                                                                   |       | 227 | 0.54 | 0.25 |   |
| BP | 0007 spermatid development                                            | 3/292 | /23 | 256  | 690  | 3 |
|    | 286                                                                   |       | 328 | 386  | 868  |   |
|    | GO:                                                                   |       | 146 | 0.54 | 0.25 |   |
| BP | 0016 histone acetylation                                              | 2/292 | /23 | 758  | 921  | 2 |
|    | 573                                                                   |       | 328 | 516  | 978  |   |
|    | GO:                                                                   |       | 63/ | 0.54 | 0.25 |   |
| BP | 0070 protein K48-linked ubiquitination                                | 1/292 | 233 | 824  | 940  | 1 |
|    | 936                                                                   |       | 28  | 728  | 013  |   |

|    |                                                              |       |     |      |      |   |
|----|--------------------------------------------------------------|-------|-----|------|------|---|
|    | GO:                                                          |       | 63/ | 0.54 | 0.25 |   |
| BP | 0071 cellular response to mechanical stimulus                | 1/292 | 233 | 824  | 940  | 1 |
|    | 260                                                          |       | 28  | 728  | 013  |   |
|    | GO:                                                          |       | 64/ | 0.55 | 0.26 |   |
| BP | 0009 glutamine family amino acid metabolic process           | 1/292 | 233 | 391  | 201  | 1 |
|    | 064                                                          |       | 28  | 725  | 566  |   |
|    | GO:                                                          |       | 231 | 0.55 | 0.26 |   |
| BP | 0009 anterior/posterior pattern specification                | 3/292 | /23 | 438  | 216  | 3 |
|    | 952                                                          |       | 328 | 286  | 87   |   |
|    | GO:                                                          |       | 65/ | 0.55 | 0.26 |   |
| BP | 0009 purine ribonucleoside triphosphate biosynthetic process | 1/292 | 233 | 951  | 439  | 1 |
|    | 206                                                          |       | 28  | 629  | 303  |   |
|    | GO:                                                          |       | 65/ | 0.55 | 0.26 |   |
| BP | 0045 cell redox homeostasis                                  | 1/292 | 233 | 951  | 439  | 1 |
|    | 454                                                          |       | 28  | 629  | 303  |   |
|    | GO:                                                          |       | 65/ | 0.55 | 0.26 |   |
| BP | 0090 cellular senescence                                     | 1/292 | 233 | 951  | 439  | 1 |
|    | 398                                                          |       | 28  | 629  | 303  |   |
|    | GO:                                                          |       | 150 | 0.56 | 0.26 |   |
| BP | 0001 blastocyst development                                  | 2/292 | /23 | 223  | 561  | 2 |
|    | 824                                                          |       | 328 | 778  | 102  |   |
|    | GO:                                                          |       | 66/ | 0.56 | 0.26 |   |
| BP | 0009 purine nucleoside triphosphate biosynthetic process     | 1/292 | 233 | 504  | 673  | 1 |
|    | 145                                                          |       | 28  | 53   | 248  |   |
|    | GO:                                                          |       | 66/ | 0.56 | 0.26 |   |
| BP | 0070 protein localization to endoplasmic reticulum           | 1/292 | 233 | 504  | 673  | 1 |
|    | 972                                                          |       | 28  | 53   | 248  |   |
|    | GO:                                                          |       | 66/ | 0.56 | 0.26 |   |
| BP | 0097 regulation of plasma lipoprotein particle levels        | 1/292 | 233 | 504  | 673  | 1 |
|    | 006                                                          |       | 28  | 53   | 248  |   |
|    | GO:                                                          |       | 236 | 0.56 | 0.26 |   |
| BP | 0048 spermatid differentiation                               | 3/292 | /23 | 889  | 848  | 3 |
|    | 515                                                          |       | 328 | 918  | 304  |   |
|    | GO:                                                          |       | 152 | 0.56 | 0.26 |   |
| BP | 0006 internal protein amino acid acetylation                 | 2/292 | /23 | 943  | 859  | 2 |
|    | 475                                                          |       | 328 | 606  | 902  |   |
|    | GO:                                                          |       | 152 | 0.56 | 0.26 |   |
| BP | 0018 internal peptidyl-lysine acetylation                    | 2/292 | /23 | 943  | 859  | 2 |
|    | 393                                                          |       | 328 | 606  | 902  |   |
|    | GO:                                                          |       | 67/ | 0.57 | 0.26 |   |
| BP | 0046 filopodium assembly                                     | 1/292 | 233 | 050  | 896  | 1 |
|    | 847                                                          |       | 28  | 514  | 579  |   |

|    |                                                                                        |       |     |      |      |   |
|----|----------------------------------------------------------------------------------------|-------|-----|------|------|---|
|    | GO:                                                                                    |       | 67/ | 0.57 | 0.26 |   |
| BP | 0070 regulation of protein processing                                                  | 1/292 | 233 | 050  | 896  | 1 |
|    | 613                                                                                    |       | 28  | 514  | 579  |   |
|    | GO:                                                                                    |       | 237 | 0.57 | 0.26 |   |
| BP | 0000 protein polyubiquitination                                                        | 3/292 | /23 | 176  | 949  | 3 |
|    | 209                                                                                    |       | 328 | 747  | 207  |   |
|    | GO:                                                                                    |       | 68/ | 0.57 | 0.27 |   |
| BP | 0009 ribonucleoside triphosphate biosynthetic process                                  | 1/292 | 233 | 589  | 102  | 1 |
|    | 201                                                                                    |       | 28  | 667  | 293  |   |
|    | GO:                                                                                    |       | 68/ | 0.57 | 0.27 |   |
| BP | 0030 endoplasmic reticulum unfolded protein response                                   | 1/292 | 233 | 589  | 102  | 1 |
|    | 968                                                                                    |       | 28  | 667  | 293  |   |
|    | GO:                                                                                    |       | 68/ | 0.57 | 0.27 |   |
| BP | 0032 negative regulation of ion transmembrane transporter activity                     | 1/292 | 233 | 589  | 102  | 1 |
|    | 413                                                                                    |       | 28  | 667  | 293  |   |
|    | GO:                                                                                    |       | 68/ | 0.57 | 0.27 |   |
| BP | 0032 maintenance of protein location in cell                                           | 1/292 | 233 | 589  | 102  | 1 |
|    | 507                                                                                    |       | 28  | 667  | 293  |   |
|    | GO:                                                                                    |       | 68/ | 0.57 | 0.27 |   |
| BP | 2000 negative regulation of reactive oxygen species metabolic process                  | 1/292 | 233 | 589  | 102  | 1 |
|    | 378                                                                                    |       | 28  | 667  | 293  |   |
|    | GO:                                                                                    |       | 68/ | 0.57 | 0.27 |   |
| BP | 2001 positive regulation of intrinsic apoptotic signaling pathway                      | 1/292 | 233 | 589  | 102  | 1 |
|    | 244                                                                                    |       | 28  | 667  | 293  |   |
|    | GO:                                                                                    |       | 69/ | 0.58 | 0.27 |   |
| BP | 0045 positive regulation of fat cell differentiation                                   | 1/292 | 233 | 122  | 338  | 1 |
|    | 600                                                                                    |       | 28  | 075  | 905  |   |
|    | GO:                                                                                    |       | 69/ | 0.58 | 0.27 |   |
| BP | 1904 positive regulation of protein localization to cell periphery                     | 1/292 | 233 | 122  | 338  | 1 |
|    | 377                                                                                    |       | 28  | 075  | 905  |   |
|    | GO:                                                                                    |       | 156 | 0.58 | 0.27 |   |
| BP | 0009 cellular response to starvation                                                   | 2/292 | /23 | 357  | 442  | 2 |
|    | 267                                                                                    |       | 328 | 521  | 657  |   |
|    | GO:                                                                                    |       | 70/ | 0.58 | 0.27 |   |
| BP | 0006 transcription initiation from RNA polymerase II promoter                          | 1/292 | 233 | 647  | 530  | 1 |
|    | 367                                                                                    |       | 28  | 823  | 06   |   |
|    | GO:                                                                                    |       | 70/ | 0.58 | 0.27 |   |
| BP | 0019 arachidonic acid metabolic process                                                | 1/292 | 233 | 647  | 530  | 1 |
|    | 369                                                                                    |       | 28  | 823  | 06   |   |
|    | GO:                                                                                    |       | 70/ | 0.58 | 0.27 |   |
| BP | 0030 negative regulation of transforming growth factor beta receptor signaling pathway | 1/292 | 233 | 647  | 530  | 1 |
|    | 512                                                                                    |       | 28  | 823  | 06   |   |

|    |                                                                                           |       |     |      |      |   |
|----|-------------------------------------------------------------------------------------------|-------|-----|------|------|---|
|    | GO:                                                                                       |       | 70/ | 0.58 | 0.27 |   |
| BP | 0048 synaptic vesicle endocytosis                                                         | 1/292 | 233 | 647  | 530  | 1 |
|    | 488                                                                                       |       | 28  | 823  | 06   |   |
|    | GO:                                                                                       |       | 70/ | 0.58 | 0.27 |   |
| BP | 0050 neuromuscular process controlling balance                                            | 1/292 | 233 | 647  | 530  | 1 |
|    | 885                                                                                       |       | 28  | 823  | 06   |   |
|    | GO:                                                                                       |       | 70/ | 0.58 | 0.27 |   |
| BP | 0140 presynaptic endocytosis                                                              | 1/292 | 233 | 647  | 530  | 1 |
|    | 238                                                                                       |       | 28  | 823  | 06   |   |
|    | GO:                                                                                       |       | 70/ | 0.58 | 0.27 |   |
| BP | 1903 regulation of protein maturation                                                     | 1/292 | 233 | 647  | 530  | 1 |
|    | 317                                                                                       |       | 28  | 823  | 06   |   |
|    | GO:                                                                                       |       | 244 | 0.59 | 0.27 |   |
| BP | 0006 DNA replication                                                                      | 3/292 | /23 | 151  | 745  | 3 |
|    | 260                                                                                       |       | 328 | 239  | 532  |   |
|    | GO:                                                                                       |       | 71/ | 0.59 | 0.27 |   |
| BP | 0042 embryonic digit morphogenesis                                                        | 1/292 | 233 | 166  | 745  | 1 |
|    | 733                                                                                       |       | 28  | 992  | 532  |   |
|    | GO:                                                                                       |       | 71/ | 0.59 | 0.27 |   |
| BP | 0043 receptor clustering                                                                  | 1/292 | 233 | 166  | 745  | 1 |
|    | 113                                                                                       |       | 28  | 992  | 532  |   |
|    | GO:                                                                                       |       | 71/ | 0.59 | 0.27 |   |
| BP | 1901 regulation of signal transduction by p53 class mediator                              | 1/292 | 233 | 166  | 745  | 1 |
|    | 796                                                                                       |       | 28  | 992  | 532  |   |
|    | GO:                                                                                       |       | 159 | 0.59 | 0.27 |   |
| BP | 2000 regulation of ubiquitin-dependent protein catabolic process                          | 2/292 | /23 | 395  | 845  | 2 |
|    | 058                                                                                       |       | 328 | 37   | 551  |   |
|    | GO:                                                                                       |       | 415 | 0.59 | 0.27 |   |
| BP | 0044 cell cycle phase transition                                                          | 5/292 | /23 | 603  | 935  | 5 |
|    | 770                                                                                       |       | 328 | 131  | 855  |   |
|    | GO:                                                                                       |       | 72/ | 0.59 | 0.27 |   |
| BP | 1903 negative regulation of cellular response to transforming growth factor beta stimulus | 1/292 | 233 | 679  | 964  | 1 |
|    | 845                                                                                       |       | 28  | 665  | 623  |   |
|    | GO:                                                                                       |       | 160 | 0.59 | 0.27 |   |
| BP | 0000 cytokinesis                                                                          | 2/292 | /23 | 737  | 984  | 2 |
|    | 910                                                                                       |       | 328 | 012  | 389  |   |
|    | GO:                                                                                       |       | 161 | 0.60 | 0.28 |   |
| BP | 0030 negative regulation of Wnt signaling pathway                                         | 2/292 | /23 | 076  | 136  | 2 |
|    | 178                                                                                       |       | 328 | 498  | 281  |   |
|    | GO:                                                                                       |       | 73/ | 0.60 | 0.28 |   |
| BP | 0045 positive regulation of DNA repair                                                    | 1/292 | 233 | 185  | 180  | 1 |
|    | 739                                                                                       |       | 28  | 923  | 377  |   |

|    |                                                                              |       |     |      |      |   |
|----|------------------------------------------------------------------------------|-------|-----|------|------|---|
|    | GO:                                                                          |       | 249 | 0.60 | 0.28 |   |
| BP | 0034 response to endoplasmic reticulum stress                                | 3/292 | /23 | 525  | 332  | 3 |
|    | 976                                                                          |       | 328 | 282  | 083  |   |
|    | GO:                                                                          |       | 163 | 0.60 | 0.28 |   |
| BP | 0018 peptidyl-lysine acetylation                                             | 2/292 | /23 | 749  | 415  | 2 |
|    | 394                                                                          |       | 328 | 009  | 186  |   |
|    | GO:                                                                          |       | 163 | 0.60 | 0.28 |   |
| BP | 0031 regulation of histone modification                                      | 2/292 | /23 | 749  | 415  | 2 |
|    | 056                                                                          |       | 328 | 009  | 186  |   |
|    | GO:                                                                          |       | 163 | 0.60 | 0.28 |   |
| BP | 1902 negative regulation of supramolecular fiber organization                | 2/292 | /23 | 749  | 415  | 2 |
|    | 904                                                                          |       | 328 | 009  | 186  |   |
|    | GO:                                                                          |       | 250 | 0.60 | 0.28 |   |
| BP | 0006 cellular amino acid metabolic process                                   | 3/292 | /23 | 796  | 430  | 3 |
|    | 520                                                                          |       | 328 | 407  | 149  |   |
|    | GO:                                                                          |       | 75/ | 0.61 | 0.28 |   |
| BP | 0043 response to alkaloid                                                    | 1/292 | 233 | 179  | 602  | 1 |
|    | 279                                                                          |       | 28  | 513  | 053  |   |
|    | GO:                                                                          |       | 76/ | 0.61 | 0.28 |   |
| BP | 0000 regulation of cyclin-dependent protein serine/threonine kinase activity | 1/292 | 233 | 667  | 815  | 1 |
|    | 079                                                                          |       | 28  | 002  | 358  |   |
|    | GO:                                                                          |       | 76/ | 0.61 | 0.28 |   |
| BP | 0051 protein autoubiquitination                                              | 1/292 | 233 | 667  | 815  | 1 |
|    | 865                                                                          |       | 28  | 002  | 358  |   |
|    | GO:                                                                          |       | 77/ | 0.62 | 0.29 |   |
| BP | 0003 neural retina development                                               | 1/292 | 233 | 148  | 018  | 1 |
|    | 407                                                                          |       | 28  | 39   | 253  |   |
|    | GO:                                                                          |       | 77/ | 0.62 | 0.29 |   |
| BP | 0016 histone deacetylation                                                   | 1/292 | 233 | 148  | 018  | 1 |
|    | 575                                                                          |       | 28  | 39   | 253  |   |
|    | GO:                                                                          |       | 77/ | 0.62 | 0.29 |   |
| BP | 0030 ubiquitin-dependent ERAD pathway                                        | 1/292 | 233 | 148  | 018  | 1 |
|    | 433                                                                          |       | 28  | 39   | 253  |   |
|    | GO:                                                                          |       | 78/ | 0.62 | 0.29 |   |
| BP | 0009 nucleoside triphosphate biosynthetic process                            | 1/292 | 233 | 623  | 225  | 1 |
|    | 142                                                                          |       | 28  | 753  | 419  |   |
|    | GO:                                                                          |       | 78/ | 0.62 | 0.29 |   |
| BP | 0046 microtubule polymerization                                              | 1/292 | 233 | 623  | 225  | 1 |
|    | 785                                                                          |       | 28  | 753  | 419  |   |
|    | GO:                                                                          |       | 79/ | 0.63 | 0.29 |   |
| BP | 0009 purine ribonucleoside triphosphate metabolic process                    | 1/292 | 233 | 093  | 437  | 1 |
|    | 205                                                                          |       | 28  | 167  | 041  |   |

|    |      |                                                                                   |       |      |      |     |   |
|----|------|-----------------------------------------------------------------------------------|-------|------|------|-----|---|
|    | GO:  |                                                                                   | 171   | 0.63 | 0.29 |     |   |
| BP | 0051 | negative regulation of cytoskeleton organization                                  | 2/292 | /23  | 353  | 550 | 2 |
|    | 494  |                                                                                   |       | 328  | 068  | 83  |   |
|    | GO:  |                                                                                   | 80/   | 0.63 | 0.29 |     |   |
| BP | 0036 | synaptic vesicle recycling                                                        | 1/292 | 233  | 556  | 623 | 1 |
|    | 465  |                                                                                   |       | 28   | 705  | 351 |   |
|    | GO:  |                                                                                   | 80/   | 0.63 | 0.29 |     |   |
| BP | 1901 | negative regulation of protein depolymerization                                   | 1/292 | 233  | 556  | 623 | 1 |
|    | 880  |                                                                                   |       | 28   | 705  | 351 |   |
|    | GO:  |                                                                                   | 80/   | 0.63 | 0.29 |     |   |
| BP | 1904 | regulation of cyclin-dependent protein kinase activity                            | 1/292 | 233  | 556  | 623 | 1 |
|    | 029  |                                                                                   |       | 28   | 705  | 351 |   |
|    | GO:  |                                                                                   | 173   | 0.63 | 0.29 |     |   |
| BP | 0071 | cellular response to amino acid stimulus                                          | 2/292 | /23  | 982  | 814 | 2 |
|    | 230  |                                                                                   |       | 328  | 676  | 106 |   |
|    | GO:  |                                                                                   | 81/   | 0.64 | 0.29 |     |   |
| BP | 0010 | regulation of G2/M transition of mitotic cell cycle                               | 1/292 | 233  | 014  | 814 | 1 |
|    | 389  |                                                                                   |       | 28   | 441  | 106 |   |
|    | GO:  |                                                                                   | 81/   | 0.64 | 0.29 |     |   |
| BP | 0022 | respiratory electron transport chain                                              | 1/292 | 233  | 014  | 814 | 1 |
|    | 904  |                                                                                   |       | 28   | 441  | 106 |   |
|    | GO:  |                                                                                   | 174   | 0.64 | 0.29 |     |   |
| BP | 0007 | vacuole organization                                                              | 2/292 | /23  | 294  | 936 | 2 |
|    | 033  |                                                                                   |       | 328  | 285  | 885 |   |
|    | GO:  |                                                                                   | 82/   | 0.64 | 0.30 |     |   |
| BP | 0015 | phospholipid transport                                                            | 1/292 | 233  | 466  | 009 | 1 |
|    | 914  |                                                                                   |       | 28   | 447  | 475 |   |
|    | GO:  |                                                                                   | 265   | 0.64 | 0.30 |     |   |
| BP | 1901 | regulation of mitotic cell cycle phase transition                                 | 3/292 | /23  | 713  | 116 | 3 |
|    | 990  |                                                                                   |       | 328  | 469  | 868 |   |
|    | GO:  |                                                                                   | 83/   | 0.64 | 0.30 |     |   |
| BP | 0006 | acyl-CoA metabolic process                                                        | 1/292 | 233  | 912  | 179 | 1 |
|    | 637  |                                                                                   |       | 28   | 794  | 186 |   |
|    | GO:  |                                                                                   | 83/   | 0.64 | 0.30 |     |   |
| BP | 0009 | ribonucleoside triphosphate metabolic process                                     | 1/292 | 233  | 912  | 179 | 1 |
|    | 199  |                                                                                   |       | 28   | 794  | 186 |   |
|    | GO:  |                                                                                   | 83/   | 0.64 | 0.30 |     |   |
| BP | 0035 | thioester metabolic process                                                       | 1/292 | 233  | 912  | 179 | 1 |
|    | 383  |                                                                                   |       | 28   | 794  | 186 |   |
|    | GO:  |                                                                                   | 83/   | 0.64 | 0.30 |     |   |
| BP | 0061 | regulation of insulin secretion involved in cellular response to glucose stimulus | 1/292 | 233  | 912  | 179 | 1 |
|    | 178  |                                                                                   |       | 28   | 794  | 186 |   |



|    |                                                                     |       |     |      |      |   |
|----|---------------------------------------------------------------------|-------|-----|------|------|---|
|    | GO:                                                                 |       | 266 | 0.64 | 0.30 |   |
| BP | 1903 regulation of mRNA metabolic process                           | 3/292 | /23 | 964  | 195  | 3 |
|    | 311                                                                 |       | 328 | 526  | 629  |   |
|    | GO:                                                                 |       | 84/ | 0.65 | 0.30 |   |
| BP | 0022 electron transport chain                                       | 1/292 | 233 | 353  | 345  | 1 |
|    | 900                                                                 |       | 28  | 554  | 875  |   |
|    | GO:                                                                 |       | 84/ | 0.65 | 0.30 |   |
| BP | 0030 sphingolipid biosynthetic process                              | 1/292 | 233 | 353  | 345  | 1 |
|    | 148                                                                 |       | 28  | 554  | 875  |   |
|    | GO:                                                                 |       | 84/ | 0.65 | 0.30 |   |
| BP | 0046 photoreceptor cell differentiation                             | 1/292 | 233 | 353  | 345  | 1 |
|    | 530                                                                 |       | 28  | 554  | 875  |   |
|    | GO:                                                                 |       | 84/ | 0.65 | 0.30 |   |
| BP | 0061 myeloid cell development                                       | 1/292 | 233 | 353  | 345  | 1 |
|    | 515                                                                 |       | 28  | 554  | 875  |   |
|    | GO:                                                                 |       | 178 | 0.65 | 0.30 |   |
| BP | 0042 response to starvation                                         | 2/292 | /23 | 519  | 415  | 2 |
|    | 594                                                                 |       | 328 | 525  | 287  |   |
|    | GO:                                                                 |       | 179 | 0.65 | 0.30 |   |
| BP | 0007 spindle organization                                           | 2/292 | /23 | 820  | 547  | 2 |
|    | 051                                                                 |       | 328 | 557  | 346  |   |
|    | GO:                                                                 |       | 86/ | 0.66 | 0.30 |   |
| BP | 1905 regulation of response to endoplasmic reticulum stress         | 1/292 | 233 | 218  | 724  | 1 |
|    | 897                                                                 |       | 28  | 589  | 346  |   |
|    | GO:                                                                 |       | 181 | 0.66 | 0.30 |   |
| BP | 0002 humoral immune response mediated by circulating immunoglobulin | 2/292 | /23 | 416  | 808  | 2 |
|    | 455                                                                 |       | 328 | 324  | 345  |   |
|    | GO:                                                                 |       | 274 | 0.66 | 0.31 |   |
| BP | 0007 sensory perception of sound                                    | 3/292 | /23 | 927  | 037  | 3 |
|    | 605                                                                 |       | 328 | 286  | 561  |   |
|    | GO:                                                                 |       | 88/ | 0.67 | 0.31 |   |
| BP | 0009 purine nucleoside triphosphate metabolic process               | 1/292 | 233 | 062  | 074  | 1 |
|    | 144                                                                 |       | 28  | 098  | 694  |   |
|    | GO:                                                                 |       | 88/ | 0.67 | 0.31 |   |
| BP | 0032 response to retinoic acid                                      | 1/292 | 233 | 062  | 074  | 1 |
|    | 526                                                                 |       | 28  | 098  | 694  |   |
|    | GO:                                                                 |       | 88/ | 0.67 | 0.31 |   |
| BP | 0034 protein localization to chromosome                             | 1/292 | 233 | 062  | 074  | 1 |
|    | 502                                                                 |       | 28  | 098  | 694  |   |
|    | GO:                                                                 |       | 364 | 0.67 | 0.31 |   |
| BP | 0018 peptidyl-lysine modification                                   | 4/292 | /23 | 074  | 074  | 4 |
|    | 205                                                                 |       | 328 | 718  | 694  |   |

|    |                                                                          |       |     |      |      |   |
|----|--------------------------------------------------------------------------|-------|-----|------|------|---|
|    | GO:                                                                      |       | 90/ | 0.67 | 0.31 |   |
| BP | 0006 ceramide metabolic process                                          | 1/292 | 233 | 884  | 426  | 1 |
|    | 672                                                                      |       | 28  | 615  | 237  |   |
|    | GO:                                                                      |       | 90/ | 0.67 | 0.31 |   |
| BP | 0009 detection of chemical stimulus                                      | 1/292 | 233 | 884  | 426  | 1 |
|    | 593                                                                      |       | 28  | 615  | 237  |   |
|    | GO:                                                                      |       | 90/ | 0.67 | 0.31 |   |
| BP | 0032 positive regulation of insulin secretion                            | 1/292 | 233 | 884  | 426  | 1 |
|    | 024                                                                      |       | 28  | 615  | 237  |   |
|    | GO:                                                                      |       | 187 | 0.68 | 0.31 |   |
| BP | 0043 response to amino acid                                              | 2/292 | /23 | 153  | 542  | 2 |
|    | 200                                                                      |       | 328 | 638  | 864  |   |
|    | GO:                                                                      |       | 91/ | 0.68 | 0.31 |   |
| BP | 0031 regulation of microtubule polymerization or depolymerization        | 1/292 | 233 | 288  | 597  | 1 |
|    | 110                                                                      |       | 28  | 165  | 2    |   |
|    | GO:                                                                      |       | 92/ | 0.68 | 0.31 |   |
| BP | 0035 insulin secretion involved in cellular response to glucose stimulus | 1/292 | 233 | 686  | 773  | 1 |
|    | 773                                                                      |       | 28  | 661  | 619  |   |
|    | GO:                                                                      |       | 189 | 0.68 | 0.31 |   |
| BP | 0061 regulation of proteasomal protein catabolic process                 | 2/292 | /23 | 716  | 779  | 2 |
|    | 136                                                                      |       | 328 | 243  | 336  |   |
|    | GO:                                                                      |       | 374 | 0.69 | 0.31 |   |
| BP | 0016 dephosphorylation                                                   | 4/292 | /23 | 120  | 958  | 4 |
|    | 311                                                                      |       | 328 | 644  | 351  |   |
|    | GO:                                                                      |       | 94/ | 0.69 | 0.32 |   |
| BP | 1901 regulation of protein depolymerization                              | 1/292 | 233 | 468  | 111  | 1 |
|    | 879                                                                      |       | 28  | 744  | 251  |   |
|    | GO:                                                                      |       | 192 | 0.69 | 0.32 |   |
| BP | 0006 protein acetylation                                                 | 2/292 | /23 | 544  | 130  | 2 |
|    | 473                                                                      |       | 328 | 865  | 34   |   |
|    | GO:                                                                      |       | 192 | 0.69 | 0.32 |   |
| BP | 2001 positive regulation of chromosome organization                      | 2/292 | /23 | 544  | 130  | 2 |
|    | 252                                                                      |       | 328 | 865  | 34   |   |
|    | GO:                                                                      |       | 95/ | 0.69 | 0.32 |   |
| BP | 1902 proton transmembrane transport                                      | 1/292 | 233 | 852  | 264  | 1 |
|    | 600                                                                      |       | 28  | 454  | 37   |   |
|    | GO:                                                                      |       | 97/ | 0.70 | 0.32 |   |
| BP | 1902 regulation of cell cycle G2/M phase transition                      | 1/292 | 233 | 605  | 604  | 1 |
|    | 749                                                                      |       | 28  | 517  | 044  |   |
|    | GO:                                                                      |       | 197 | 0.70 | 0.32 |   |
| BP | 0006 phagocytosis, engulfment                                            | 2/292 | /23 | 885  | 725  | 2 |
|    | 911                                                                      |       | 328 | 618  | 199  |   |

|    |                                                       |       |     |      |      |   |
|----|-------------------------------------------------------|-------|-----|------|------|---|
|    | GO:                                                   |       | 98/ | 0.70 | 0.32 |   |
| BP | 0140 exocytic process                                 | 1/292 | 233 | 974  | 750  | 1 |
|    | 029                                                   |       | 28  | 988  | 07   |   |
|    | GO:                                                   |       | 98/ | 0.70 | 0.32 |   |
| BP | 1903 organelle disassembly                            | 1/292 | 233 | 974  | 750  | 1 |
|    | 008                                                   |       | 28  | 988  | 07   |   |
|    | GO:                                                   |       | 99/ | 0.71 | 0.32 |   |
| BP | 0033 nucleoside bisphosphate metabolic process        | 1/292 | 233 | 339  | 877  | 1 |
|    | 865                                                   |       | 28  | 831  | 313  |   |
|    | GO:                                                   |       | 99/ | 0.71 | 0.32 |   |
| BP | 0033 ribonucleoside bisphosphate metabolic process    | 1/292 | 233 | 339  | 877  | 1 |
|    | 875                                                   |       | 28  | 831  | 313  |   |
|    | GO:                                                   |       | 99/ | 0.71 | 0.32 |   |
| BP | 0034 purine nucleoside bisphosphate metabolic process | 1/292 | 233 | 339  | 877  | 1 |
|    | 032                                                   |       | 28  | 831  | 313  |   |
|    | GO:                                                   |       | 99/ | 0.71 | 0.32 |   |
| BP | 0036 ERAD pathway                                     | 1/292 | 233 | 339  | 877  | 1 |
|    | 503                                                   |       | 28  | 831  | 313  |   |
|    | GO:                                                   |       | 99/ | 0.71 | 0.32 |   |
| BP | 0097 dendritic spine organization                     | 1/292 | 233 | 339  | 877  | 1 |
|    | 061                                                   |       | 28  | 831  | 313  |   |
|    | GO:                                                   |       | 100 | 0.71 | 0.33 |   |
| BP | 0006 protein deacetylation                            | 1/292 | /23 | 700  | 010  | 1 |
|    | 476                                                   |       | 328 | 103  | 369  |   |
|    | GO:                                                   |       | 100 | 0.71 | 0.33 |   |
| BP | 0032 regulation of TOR signaling                      | 1/292 | /23 | 700  | 010  | 1 |
|    | 006                                                   |       | 328 | 103  | 369  |   |
|    | GO:                                                   |       | 100 | 0.71 | 0.33 |   |
| BP | 0098 inorganic cation import across plasma membrane   | 1/292 | /23 | 700  | 010  | 1 |
|    | 659                                                   |       | 328 | 103  | 369  |   |
|    | GO:                                                   |       | 100 | 0.71 | 0.33 |   |
| BP | 0099 inorganic ion import across plasma membrane      | 1/292 | /23 | 700  | 010  | 1 |
|    | 587                                                   |       | 328 | 103  | 369  |   |
|    | GO:                                                   |       | 201 | 0.71 | 0.33 |   |
| BP | 0009 fertilization                                    | 2/292 | /23 | 922  | 104  | 2 |
|    | 566                                                   |       | 328 | 518  | 508  |   |
|    | GO:                                                   |       | 101 | 0.72 | 0.33 |   |
| BP | 0006 DNA-templated transcription, initiation          | 1/292 | /23 | 055  | 149  | 1 |
|    | 352                                                   |       | 328 | 862  | 346  |   |
|    | GO:                                                   |       | 101 | 0.72 | 0.33 |   |
| BP | 0007 lysosomal transport                              | 1/292 | /23 | 055  | 149  | 1 |
|    | 041                                                   |       | 328 | 862  | 346  |   |

|    |                                                |       |     |      |      |   |
|----|------------------------------------------------|-------|-----|------|------|---|
|    | GO:                                            |       | 297 | 0.72 | 0.33 |   |
| BP | 1901 regulation of cell cycle phase transition | 3/292 | /23 | 118  | 170  | 3 |
|    | 987                                            |       | 328 | 763  | 014  |   |
|    | GO:                                            |       | 204 | 0.72 | 0.33 |   |
| BP | 0009 nucleotide biosynthetic process           | 2/292 | /23 | 679  | 419  | 2 |
|    | 165                                            |       | 328 | 708  | 683  |   |
|    | GO:                                            |       | 103 | 0.72 | 0.33 |   |
| BP | 0006 chloride transport                        | 1/292 | /23 | 754  | 428  | 1 |
|    | 821                                            |       | 328 | 065  | 883  |   |
|    | GO:                                            |       | 103 | 0.72 | 0.33 |   |
| BP | 0015 organophosphate ester transport           | 1/292 | /23 | 754  | 428  | 1 |
|    | 748                                            |       | 328 | 065  | 883  |   |
|    | GO:                                            |       | 103 | 0.72 | 0.33 |   |
| BP | 2000 regulation of synaptic vesicle exocytosis | 1/292 | /23 | 754  | 428  | 1 |
|    | 300                                            |       | 328 | 065  | 883  |   |
|    | GO:                                            |       | 104 | 0.73 | 0.33 |   |
| BP | 0006 translational initiation                  | 1/292 | /23 | 096  | 577  | 1 |
|    | 413                                            |       | 328 | 619  | 918  |   |
|    | GO:                                            |       | 206 | 0.73 | 0.33 |   |
| BP | 0099 plasma membrane invagination              | 2/292 | /23 | 174  | 605  | 2 |
|    | 024                                            |       | 328 | 874  | 5    |   |
|    | GO:                                            |       | 106 | 0.73 | 0.33 |   |
| BP | 0021 spinal cord development                   | 1/292 | /23 | 768  | 861  | 1 |
|    | 510                                            |       | 328 | 903  | 453  |   |
|    | GO:                                            |       | 106 | 0.73 | 0.33 |   |
| BP | 0106 neuron projection organization            | 1/292 | /23 | 768  | 861  | 1 |
|    | 027                                            |       | 328 | 903  | 453  |   |
|    | GO:                                            |       | 209 | 0.73 | 0.33 |   |
| BP | 1901 nucleoside phosphate biosynthetic process | 2/292 | /23 | 903  | 914  | 2 |
|    | 293                                            |       | 328 | 355  | 732  |   |
|    | GO:                                            |       | 210 | 0.74 | 0.34 |   |
| BP | 1902 regulation of chromatin organization      | 2/292 | /23 | 142  | 015  | 2 |
|    | 275                                            |       | 328 | 413  | 978  |   |
|    | GO:                                            |       | 109 | 0.74 | 0.34 |   |
| BP | 0009 nucleoside triphosphate metabolic process | 1/292 | /23 | 746  | 275  | 1 |
|    | 141                                            |       | 328 | 066  | 885  |   |
|    | GO:                                            |       | 109 | 0.74 | 0.34 |   |
| BP | 0051 localization within membrane              | 1/292 | /23 | 746  | 275  | 1 |
|    | 668                                            |       | 328 | 066  | 885  |   |
|    | GO:                                            |       | 213 | 0.74 | 0.34 |   |
| BP | 0010 membrane invagination                     | 2/292 | /23 | 848  | 314  | 2 |
|    | 324                                            |       | 328 | 408  | 288  |   |

|    |      |                                                                          |       |     |      |      |   |
|----|------|--------------------------------------------------------------------------|-------|-----|------|------|---|
|    | GO:  |                                                                          |       | 311 | 0.74 | 0.34 |   |
| BP | 1990 | cellular response to leukemia inhibitory factor                          | 3/292 | /23 | 956  | 355  | 3 |
|    | 830  |                                                                          |       | 328 | 406  | 265  |   |
|    | GO:  |                                                                          |       | 110 | 0.75 | 0.34 |   |
| BP | 0007 | homophilic cell adhesion via plasma membrane adhesion molecules          | 1/292 | /23 | 063  | 387  | 1 |
|    | 156  |                                                                          |       | 328 | 657  | 339  |   |
|    | GO:  |                                                                          |       | 110 | 0.75 | 0.34 |   |
| BP | 0120 | positive regulation of plasma membrane bounded cell projection assembly  | 1/292 | /23 | 063  | 387  | 1 |
|    | 034  |                                                                          |       | 328 | 657  | 339  |   |
|    | GO:  |                                                                          |       | 312 | 0.75 | 0.34 |   |
| BP | 1990 | response to leukemia inhibitory factor                                   | 3/292 | /23 | 149  | 418  | 3 |
|    | 823  |                                                                          |       | 328 | 99   | 344  |   |
|    | GO:  |                                                                          |       | 111 | 0.75 | 0.34 |   |
| BP | 0001 | long-chain fatty acid metabolic process                                  | 1/292 | /23 | 377  | 496  | 1 |
|    | 676  |                                                                          |       | 328 | 268  | 75   |   |
|    | GO:  |                                                                          |       | 111 | 0.75 | 0.34 |   |
| BP | 0035 | protein deacylation                                                      | 1/292 | /23 | 377  | 496  | 1 |
|    | 601  |                                                                          |       | 328 | 268  | 75   |   |
|    | GO:  |                                                                          |       | 111 | 0.75 | 0.34 |   |
| BP | 0098 | macromolecule deacylation                                                | 1/292 | /23 | 377  | 496  | 1 |
|    | 732  |                                                                          |       | 328 | 268  | 75   |   |
|    | GO:  |                                                                          |       | 219 | 0.76 | 0.34 |   |
| BP | 0044 | cellular lipid catabolic process                                         | 2/292 | /23 | 210  | 869  | 2 |
|    | 242  |                                                                          |       | 328 | 927  | 629  |   |
|    | GO:  |                                                                          |       | 115 | 0.76 | 0.35 |   |
| BP | 0016 | protein deubiquitination                                                 | 1/292 | /23 | 592  | 035  | 1 |
|    | 579  |                                                                          |       | 328 | 891  | 706  |   |
|    | GO:  |                                                                          |       | 221 | 0.76 | 0.35 |   |
| BP | 0098 | anion transmembrane transport                                            | 2/292 | /23 | 650  | 044  | 2 |
|    | 656  |                                                                          |       | 328 | 719  | 784  |   |
|    | GO:  |                                                                          |       | 221 | 0.76 | 0.35 |   |
| BP | 1903 | regulation of proteolysis involved in cellular protein catabolic process | 2/292 | /23 | 650  | 044  | 2 |
|    | 050  |                                                                          |       | 328 | 719  | 784  |   |
|    | GO:  |                                                                          |       | 116 | 0.76 | 0.35 |   |
| BP | 2000 | regulation of G1/S transition of mitotic cell cycle                      | 1/292 | /23 | 887  | 144  | 1 |
|    | 045  |                                                                          |       | 328 | 332  | 256  |   |
|    | GO:  |                                                                          |       | 223 | 0.77 | 0.35 |   |
| BP | 0051 | protein complex oligomerization                                          | 2/292 | /23 | 083  | 225  | 2 |
|    | 259  |                                                                          |       | 328 | 448  | 173  |   |
|    | GO:  |                                                                          |       | 117 | 0.77 | 0.35 |   |
| BP | 0000 | G2/M transition of mitotic cell cycle                                    | 1/292 | /23 | 178  | 250  | 1 |
|    | 086  |                                                                          |       | 328 | 083  | 959  |   |

|    |                                                           |       |     |      |      |   |
|----|-----------------------------------------------------------|-------|-----|------|------|---|
|    | GO:                                                       |       | 117 | 0.77 | 0.35 |   |
| BP | 0007 meiosis I                                            | 1/292 | /23 | 178  | 250  | 1 |
|    | 127                                                       |       | 328 | 083  | 959  |   |
|    | GO:                                                       |       | 121 | 0.78 | 0.35 |   |
| BP | 0046 membrane lipid biosynthetic process                  | 1/292 | /23 | 305  | 756  | 1 |
|    | 467                                                       |       | 328 | 085  | 864  |   |
|    | GO:                                                       |       | 122 | 0.78 | 0.35 |   |
| BP | 0031 microtubule polymerization or<br>depolymerization    | 1/292 | /23 | 578  | 854  | 1 |
|    | 109                                                       |       | 328 | 06   | 896  |   |
|    | GO:                                                       |       | 122 | 0.78 | 0.35 |   |
| BP | 0031 TOR signaling                                        | 1/292 | /23 | 578  | 854  | 1 |
|    | 929                                                       |       | 328 | 06   | 896  |   |
|    | GO:                                                       |       | 122 | 0.78 | 0.35 |   |
| BP | 0061 meiosis I cell cycle process                         | 1/292 | /23 | 578  | 854  | 1 |
|    | 982                                                       |       | 328 | 06   | 896  |   |
|    | GO:                                                       |       | 231 | 0.78 | 0.35 |   |
| BP | 0099 synaptic vesicle cycle                               | 2/292 | /23 | 745  | 922  | 2 |
|    | 504                                                       |       | 328 | 304  | 326  |   |
|    | GO:                                                       |       | 123 | 0.78 | 0.35 |   |
| BP | 0000 telomere maintenance                                 | 1/292 | /23 | 847  | 951  | 1 |
|    | 723                                                       |       | 328 | 611  | 221  |   |
|    | GO:                                                       |       | 123 | 0.78 | 0.35 |   |
| BP | 0051 protein depolymerization                             | 1/292 | /23 | 847  | 951  | 1 |
|    | 261                                                       |       | 328 | 611  | 221  |   |
|    | GO:                                                       |       | 233 | 0.79 | 0.36 |   |
| BP | 0090 establishment of protein localization to<br>membrane | 2/292 | /23 | 143  | 077  | 2 |
|    | 150                                                       |       | 328 | 896  | 4    |   |
|    | GO:                                                       |       | 125 | 0.79 | 0.36 |   |
| BP | 0010 response to ionizing radiation                       | 1/292 | /23 | 376  | 156  | 1 |
|    | 212                                                       |       | 328 | 615  | 688  |   |
|    | GO:                                                       |       | 125 | 0.79 | 0.36 |   |
| BP | 0032 telomere organization                                | 1/292 | /23 | 376  | 156  | 1 |
|    | 200                                                       |       | 328 | 615  | 688  |   |
|    | GO:                                                       |       | 125 | 0.79 | 0.36 |   |
| BP | 1902 protein localization to cell junction                | 1/292 | /23 | 376  | 156  | 1 |
|    | 414                                                       |       | 328 | 615  | 688  |   |
|    | GO:                                                       |       | 235 | 0.79 | 0.36 |   |
| BP | 0006 protein dephosphorylation                            | 2/292 | /23 | 535  | 220  | 2 |
|    | 470                                                       |       | 328 | 899  | 302  |   |
|    | GO:                                                       |       | 126 | 0.79 | 0.36 |   |
| BP | 0051 negative regulation of DNA metabolic<br>process      | 1/292 | /23 | 636  | 248  | 1 |
|    | 053                                                       |       | 328 | 152  | 065  |   |

|    |                                                             |       |     |      |      |   |
|----|-------------------------------------------------------------|-------|-----|------|------|---|
|    | GO:                                                         |       | 126 | 0.79 | 0.36 |   |
| BP | 0120 olefinic compound metabolic process                    | 1/292 | /23 | 636  | 248  | 1 |
|    | 254                                                         |       | 328 | 152  | 065  |   |
|    | GO:                                                         |       | 127 | 0.79 | 0.36 |   |
| BP | 0006 protein export from nucleus                            | 1/292 | /23 | 892  | 337  | 1 |
|    | 611                                                         |       | 328 | 433  | 827  |   |
|    | GO:                                                         |       | 127 | 0.79 | 0.36 |   |
| BP | 0042 lipoprotein metabolic process                          | 1/292 | /23 | 892  | 337  | 1 |
|    | 157                                                         |       | 328 | 433  | 827  |   |
|    | GO:                                                         |       | 127 | 0.79 | 0.36 |   |
| BP | 0090 negative regulation of canonical Wnt signaling pathway | 1/292 | /23 | 892  | 337  | 1 |
|    | 090                                                         |       | 328 | 433  | 827  |   |
|    | GO:                                                         |       | 237 | 0.79 | 0.36 |   |
| BP | 0043 protein acylation                                      | 2/292 | /23 | 921  | 342  | 2 |
|    | 543                                                         |       | 328 | 393  | 041  |   |
|    | GO:                                                         |       | 128 | 0.80 | 0.36 |   |
| BP | 0006 regulation of DNA repair                               | 1/292 | /23 | 145  | 434  | 1 |
|    | 282                                                         |       | 328 | 5    | 969  |   |
|    | GO:                                                         |       | 131 | 0.80 | 0.36 |   |
| BP | 0006 sphingolipid metabolic process                         | 1/292 | /23 | 885  | 753  | 1 |
|    | 665                                                         |       | 328 | 814  | 414  |   |
|    | GO:                                                         |       | 131 | 0.80 | 0.36 |   |
| BP | 0007 mitotic cell cycle checkpoint                          | 1/292 | /23 | 885  | 753  | 1 |
|    | 093                                                         |       | 328 | 814  | 414  |   |
|    | GO:                                                         |       | 132 | 0.81 | 0.36 |   |
| BP | 0006 DNA-dependent DNA replication                          | 1/292 | /23 | 126  | 853  | 1 |
|    | 261                                                         |       | 328 | 42   | 667  |   |
|    | GO:                                                         |       | 134 | 0.81 | 0.37 |   |
| BP | 0044 cell cycle G2/M phase transition                       | 1/292 | /23 | 598  | 049  | 1 |
|    | 839                                                         |       | 328 | 615  | 931  |   |
|    | GO:                                                         |       | 134 | 0.81 | 0.37 |   |
| BP | 1902 regulation of cell cycle G1/S phase transition         | 1/292 | /23 | 598  | 049  | 1 |
|    | 806                                                         |       | 328 | 615  | 931  |   |
|    | GO:                                                         |       | 135 | 0.81 | 0.37 |   |
| BP | 0070 protein modification by small protein removal          | 1/292 | /23 | 830  | 145  | 1 |
|    | 646                                                         |       | 328 | 279  | 977  |   |
|    | GO:                                                         |       | 248 | 0.81 | 0.37 |   |
| BP | 0060 long-term synaptic potentiation                        | 2/292 | /23 | 928  | 181  | 2 |
|    | 291                                                         |       | 328 | 817  | 561  |   |
|    | GO:                                                         |       | 140 | 0.82 | 0.37 |   |
| BP | 0007 vacuolar transport                                     | 1/292 | /23 | 945  | 633  | 1 |
|    | 034                                                         |       | 328 | 717  | 803  |   |

|    |                                                                     |       |     |      |      |   |
|----|---------------------------------------------------------------------|-------|-----|------|------|---|
|    | GO:                                                                 |       | 141 | 0.83 | 0.37 |   |
| BP | 0009 purine ribonucleotide biosynthetic process                     | 1/292 | /23 | 160  | 712  | 1 |
|    | 152                                                                 |       | 328 | 477  | 697  |   |
|    | GO:                                                                 |       | 141 | 0.83 | 0.37 |   |
| BP | 0016 synaptic vesicle exocytosis                                    | 1/292 | /23 | 160  | 712  | 1 |
|    | 079                                                                 |       | 328 | 477  | 697  |   |
|    | GO:                                                                 |       | 143 | 0.83 | 0.37 |   |
| BP | 0034 chromatin organization involved in regulation of transcription | 1/292 | /23 | 581  | 894  | 1 |
|    | 401                                                                 |       | 328 | 944  | 516  |   |
|    | GO:                                                                 |       | 260 | 0.83 | 0.38 |   |
| BP | 0099 vesicle-mediated transport in synapse                          | 2/292 | /23 | 912  | 035  | 2 |
|    | 003                                                                 |       | 328 | 503  | 04   |   |
|    | GO:                                                                 |       | 146 | 0.84 | 0.38 |   |
| BP | 0051 nuclear export                                                 | 1/292 | /23 | 194  | 144  | 1 |
|    | 168                                                                 |       | 328 | 515  | 129  |   |
|    | GO:                                                                 |       | 146 | 0.84 | 0.38 |   |
| BP | 0098 regulation of synaptic vesicle cycle                           | 1/292 | /23 | 194  | 144  | 1 |
|    | 693                                                                 |       | 328 | 515  | 129  |   |
|    | GO:                                                                 |       | 470 | 0.84 | 0.38 |   |
| BP | 0010 proteasomal protein catabolic process                          | 4/292 | /23 | 251  | 160  | 4 |
|    | 498                                                                 |       | 328 | 849  | 734  |   |
|    | GO:                                                                 |       | 147 | 0.84 | 0.38 |   |
| BP | 0031 negative regulation of protein-containing complex assembly     | 1/292 | /23 | 393  | 215  | 1 |
|    | 333                                                                 |       | 328 | 6    | 559  |   |
|    | GO:                                                                 |       | 150 | 0.84 | 0.38 |   |
| BP | 0009 ribonucleotide biosynthetic process                            | 1/292 | /23 | 975  | 460  | 1 |
|    | 260                                                                 |       | 328 | 986  | 402  |   |
|    | GO:                                                                 |       | 150 | 0.84 | 0.38 |   |
| BP | 0061 membrane fusion                                                | 1/292 | /23 | 975  | 460  | 1 |
|    | 025                                                                 |       | 328 | 986  | 402  |   |
|    | GO:                                                                 |       | 151 | 0.85 | 0.38 |   |
| BP | 0048 camera-type eye morphogenesis                                  | 1/292 | /23 | 165  | 536  | 1 |
|    | 593                                                                 |       | 328 | 261  | 616  |   |
|    | GO:                                                                 |       | 481 | 0.85 | 0.38 |   |
| BP | 0007 mitochondrion organization                                     | 4/292 | /23 | 506  | 681  | 4 |
|    | 005                                                                 |       | 328 | 949  | 741  |   |
|    | GO:                                                                 |       | 271 | 0.85 | 0.38 |   |
| BP | 0006 protein targeting                                              | 2/292 | /23 | 555  | 694  | 2 |
|    | 605                                                                 |       | 328 | 938  | 417  |   |
|    | GO:                                                                 |       | 154 | 0.85 | 0.38 |   |
| BP | 0007 single fertilization                                           | 1/292 | /23 | 718  | 758  | 1 |
|    | 338                                                                 |       | 328 | 946  | 641  |   |



|    |                                                                        |       |     |      |      |   |
|----|------------------------------------------------------------------------|-------|-----|------|------|---|
|    | GO:                                                                    |       | 275 | 0.86 | 0.38 |   |
| BP | 0016 vesicle organization                                              | 2/292 | /23 | 114  | 928  | 2 |
|    | 050                                                                    |       | 328 | 66   | 028  |   |
|    | GO:                                                                    |       | 157 | 0.86 | 0.38 |   |
| BP | 0046 ribose phosphate biosynthetic process                             | 1/292 | /23 | 252  | 961  | 1 |
|    | 390                                                                    |       | 328 | 033  | 493  |   |
|    | GO:                                                                    |       | 157 | 0.86 | 0.38 |   |
| BP | 0050 nucleic acid transport                                            | 1/292 | /23 | 252  | 961  | 1 |
|    | 657                                                                    |       | 328 | 033  | 493  |   |
|    | GO:                                                                    |       | 157 | 0.86 | 0.38 |   |
| BP | 0050 RNA transport                                                     | 1/292 | /23 | 252  | 961  | 1 |
|    | 658                                                                    |       | 328 | 033  | 493  |   |
|    | GO:                                                                    |       | 385 | 0.86 | 0.38 |   |
| BP | 0007 microtubule-based movement                                        | 3/292 | /23 | 310  | 978  | 3 |
|    | 018                                                                    |       | 328 | 116  | 188  |   |
|    | GO:                                                                    |       | 158 | 0.86 | 0.39 |   |
| BP | 0043 regulation of RNA splicing                                        | 1/292 | /23 | 425  | 020  | 1 |
|    | 484                                                                    |       | 328 | 284  | 649  |   |
|    | GO:                                                                    |       | 160 | 0.86 | 0.39 |   |
| BP | 0006 purine nucleotide biosynthetic process                            | 1/292 | /23 | 765  | 154  | 1 |
|    | 164                                                                    |       | 328 | 286  | 998  |   |
|    | GO:                                                                    |       | 160 | 0.86 | 0.39 |   |
| BP | 0051 establishment of RNA localization                                 | 1/292 | /23 | 765  | 154  | 1 |
|    | 236                                                                    |       | 328 | 286  | 998  |   |
|    | GO:                                                                    |       | 163 | 0.87 | 0.39 |   |
| BP | 0040 regulation of gene expression, epigenetic                         | 1/292 | /23 | 259  | 368  | 1 |
|    | 029                                                                    |       | 328 | 441  | 37   |   |
|    | GO:                                                                    |       | 165 | 0.87 | 0.39 |   |
| BP | 0072 purine-containing compound biosynthetic process                   | 1/292 | /23 | 578  | 502  | 1 |
|    | 522                                                                    |       | 328 | 619  | 713  |   |
|    | GO:                                                                    |       | 167 | 0.87 | 0.39 |   |
| BP | 0006 chromatin remodeling                                              | 1/292 | /23 | 889  | 633  | 1 |
|    | 338                                                                    |       | 328 | 827  | 397  |   |
|    | GO:                                                                    |       | 405 | 0.88 | 0.39 |   |
| BP | 0043 proteasome-mediated ubiquitin-dependent protein catabolic process | 3/292 | /23 | 477  | 873  | 3 |
|    | 161                                                                    |       | 328 | 988  | 284  |   |
|    | GO:                                                                    |       | 171 | 0.88 | 0.39 |   |
| BP | 0065 protein-DNA complex assembly                                      | 1/292 | /23 | 489  | 873  | 1 |
|    | 004                                                                    |       | 328 | 124  | 284  |   |
|    | GO:                                                                    |       | 294 | 0.88 | 0.39 |   |
| BP | 0071 cellular response to abiotic stimulus                             | 2/292 | /23 | 508  | 873  | 2 |
|    | 214                                                                    |       | 328 | 228  | 284  |   |

|    |                                                  |       |     |      |      |   |
|----|--------------------------------------------------|-------|-----|------|------|---|
|    | GO:                                              |       | 294 | 0.88 | 0.39 |   |
| BP | 0104 cellular response to environmental stimulus | 2/292 | /23 | 508  | 873  | 2 |
|    | 004                                              |       | 328 | 228  | 284  |   |
|    | GO:                                              |       | 173 | 0.88 | 0.39 |   |
| BP | 0051 protein homooligomerization                 | 1/292 | /23 | 777  | 984  | 1 |
|    | 260                                              |       | 328 | 595  | 873  |   |
|    | GO:                                              |       | 174 | 0.88 | 0.40 |   |
| BP | 0006 membrane lipid metabolic process            | 1/292 | /23 | 919  | 038  | 1 |
|    | 643                                              |       | 328 | 117  | 841  |   |
|    | GO:                                              |       | 410 | 0.88 | 0.40 |   |
| BP | 0010 endomembrane system organization            | 3/292 | /23 | 969  | 051  | 3 |
|    | 256                                              |       | 328 | 956  | 959  |   |
|    | GO:                                              |       | 180 | 0.89 | 0.40 |   |
| BP | 0000 cell cycle checkpoint                       | 1/292 | /23 | 731  | 385  | 1 |
|    | 075                                              |       | 328 | 667  | 01   |   |
|    | GO:                                              |       | 182 | 0.89 | 0.40 |   |
| BP | 0006 RNA localization                            | 1/292 | /23 | 989  | 490  | 1 |
|    | 403                                              |       | 328 | 098  | 994  |   |
|    | GO:                                              |       | 187 | 0.90 | 0.40 |   |
| BP | 0006 complement activation                       | 1/292 | /23 | 604  | 758  | 1 |
|    | 956                                              |       | 328 | 883  | 131  |   |
|    | GO:                                              |       | 193 | 0.91 | 0.41 |   |
| BP | 0006 protein glycosylation                       | 1/292 | /23 | 294  | 038  | 1 |
|    | 486                                              |       | 328 | 193  | 2    |   |
|    | GO:                                              |       | 193 | 0.91 | 0.41 |   |
| BP | 0015 nucleobase-containing compound transport    | 1/292 | /23 | 294  | 038  | 1 |
|    | 931                                              |       | 328 | 193  | 2    |   |
|    | GO:                                              |       | 193 | 0.91 | 0.41 |   |
| BP | 0043 macromolecule glycosylation                 | 1/292 | /23 | 294  | 038  | 1 |
|    | 413                                              |       | 328 | 193  | 2    |   |
|    | GO:                                              |       | 444 | 0.91 | 0.41 |   |
| BP | 0034 ncRNA metabolic process                     | 3/292 | /23 | 845  | 275  | 3 |
|    | 660                                              |       | 328 | 455  | 946  |   |
|    | GO:                                              |       | 206 | 0.92 | 0.41 |   |
| BP | 0006 rRNA processing                             | 1/292 | /23 | 619  | 613  | 1 |
|    | 364                                              |       | 328 | 64   | 735  |   |
|    | GO:                                              |       | 208 | 0.92 | 0.41 |   |
| BP | 0070 glycosylation                               | 1/292 | /23 | 804  | 686  | 1 |
|    | 085                                              |       | 328 | 875  | 81   |   |
|    | GO:                                              |       | 214 | 0.93 | 0.41 |   |
| BP | 0071 protein-DNA complex subunit organization    | 1/292 | /23 | 333  | 913  | 1 |
|    | 824                                              |       | 328 | 238  | 941  |   |

|    |                                            |        |     |      |      |   |
|----|--------------------------------------------|--------|-----|------|------|---|
|    | GO:                                        |        | 215 | 0.93 | 0.41 |   |
| BP | 0016 rRNA metabolic process                | 1/292  | /23 | 417  | 941  | 1 |
|    | 072                                        |        | 328 | 459  | 556  |   |
|    | GO:                                        |        | 355 | 0.93 | 0.42 |   |
| BP | 0034 ncRNA processing                      | 2/292  | /23 | 849  | 125  | 2 |
|    | 470                                        |        | 328 | 926  | 471  |   |
|    | GO:                                        |        | 369 | 0.94 | 0.42 |   |
| BP | 0033 regulation of chromosome organization | 2/292  | /23 | 689  | 492  | 2 |
|    | 044                                        |        | 328 | 538  | 003  |   |
|    | GO:                                        |        | 279 | 0.97 | 0.43 |   |
| BP | 0006 sulfur compound metabolic process     | 1/292  | /23 | 085  | 556  | 1 |
|    | 790                                        |        | 328 | 779  | 725  |   |
|    | GO:                                        |        | 287 | 0.97 | 0.43 |   |
| BP | 0031 regulation of protein stability       | 1/292  | /23 | 368  | 672  | 1 |
|    | 647                                        |        | 328 | 405  | 905  |   |
|    | GO:                                        |        | 296 | 0.97 | 0.43 |   |
| BP | 0042 ribosome biogenesis                   | 1/292  | /23 | 653  | 790  | 1 |
|    | 254                                        |        | 328 | 831  | 284  |   |
|    | GO:                                        |        | 448 | 0.97 | 0.43 |   |
| BP | 0016 histone modification                  | 2/292  | /23 | 723  | 810  | 2 |
|    | 570                                        |        | 328 | 594  | 92   |   |
|    | GO:                                        |        | 310 | 0.98 | 0.43 |   |
| BP | 0060 cilium assembly                       | 1/292  | /23 | 037  | 934  | 1 |
|    | 271                                        |        | 328 | 722  | 394  |   |
|    | GO:                                        |        | 462 | 0.98 | 0.43 |   |
| BP | 0016 covalent chromatin modification       | 2/292  | /23 | 046  | 934  | 2 |
|    | 569                                        |        | 328 | 631  | 394  |   |
|    | GO:                                        |        | 481 | 0.98 | 0.44 |   |
| BP | 0006 DNA repair                            | 2/292  | /23 | 414  | 088  | 2 |
|    | 281                                        |        | 328 | 952  | 732  |   |
|    | GO:                                        |        | 343 | 0.98 | 0.44 |   |
| BP | 0044 cilium organization                   | 1/292  | /23 | 712  | 211  | 1 |
|    | 782                                        |        | 328 | 755  | 41   |   |
|    | GO:                                        |        | 386 | 0.99 | 0.44 |   |
| BP | 0008 RNA splicing                          | 1/292  | /23 | 257  | 444  | 1 |
|    | 380                                        |        | 328 | 529  | 616  |   |
|    | GO:                                        |        | 409 | 0.99 | 0.44 |   |
| BP | 0022 ribonucleoprotein complex biogenesis  | 1/292  | /23 | 447  | 518  | 1 |
|    | 613                                        |        | 328 | 074  | 685  |   |
|    | GO:                                        |        | 403 | 1.31 | 3.02 |   |
| CC | 0043 receptor complex                      | 32/294 | /23 | E-   | E-   | 3 |
|    | 235                                        |        | 271 | 16   | 14   | 2 |

|    |                                                 |        |     |      |      |   |   |
|----|-------------------------------------------------|--------|-----|------|------|---|---|
|    | GO:                                             |        | 379 | 1.93 | 1.57 |   |   |
| CC | 0045 membrane raft                              | 25/294 | /23 | E-   | E-   | 2 | 5 |
|    | 121                                             |        | 271 | 11   | 09   |   |   |
|    | GO:                                             |        | 380 | 2.04 | 1.57 | 2 | 5 |
| CC | 0098 membrane microdomain                       | 25/294 | /23 | E-   | E-   | 2 | 5 |
|    | 857                                             |        | 271 | 11   | 09   |   |   |
|    | GO:                                             |        | 393 | 4.19 | 2.42 | 2 | 5 |
| CC | 0098 membrane region                            | 25/294 | /23 | E-   | E-   | 2 | 5 |
|    | 589                                             |        | 271 | 11   | 09   |   |   |
|    | GO:                                             |        | 97/ | 3.92 | 0.00 |   |   |
| CC | 0005 caveola                                    | 9/294  | 232 | E-   | 018  | 9 |   |
|    | 901                                             |        | 71  | 06   | 085  |   |   |
|    | GO:                                             |        | 130 | 6.24 | 0.00 | 1 | 0 |
| CC | 0044 plasma membrane raft                       | 10/294 | /23 | E-   | 023  |   |   |
|    | 853                                             |        | 271 | 06   | 961  |   |   |
|    | GO:                                             |        | 187 | 2.76 | 0.00 | 1 | 1 |
| CC | 0098 plasma membrane signaling receptor complex | 11/294 | /23 | E-   | 090  |   |   |
|    | 802                                             |        | 271 | 05   | 885  |   |   |
|    | GO:                                             |        | 385 | 3.50 | 0.00 | 1 | 6 |
| CC | 0062 collagen-containing extracellular matrix   | 16/294 | /23 | E-   | 100  |   |   |
|    | 023                                             |        | 271 | 05   | 984  |   |   |
|    | GO:                                             |        | 85/ | 0.00 | 0.00 |   |   |
| CC | 0005 endoplasmic reticulum lumen                | 7/294  | 232 | 010  | 260  | 7 |   |
|    | 788                                             |        | 71  | 177  | 68   |   |   |
|    | GO:                                             |        | 140 | 0.00 | 0.00 |   |   |
| CC | 0043 perikaryon                                 | 8/294  | /23 | 041  | 962  | 8 |   |
|    | 204                                             |        | 271 | 767  | 837  |   |   |
|    | GO:                                             |        | 401 | 0.00 | 0.01 | 1 | 4 |
| CC | 0030 secretory granule                          | 14/294 | /23 | 062  | 319  |   |   |
|    | 141                                             |        | 271 | 979  | 844  |   |   |
|    | GO:                                             |        | 16/ | 0.00 | 0.01 |   |   |
| CC | 0098 neuronal dense core vesicle                | 3/294  | 232 | 098  | 900  | 3 |   |
|    | 992                                             |        | 71  | 943  | 738  |   |   |
|    | GO:                                             |        | 213 | 0.00 | 0.02 |   |   |
| CC | 0044 neuron projection terminus                 | 9/294  | /23 | 161  | 741  | 9 |   |
|    | 306                                             |        | 271 | 665  | 179  |   |   |
|    | GO:                                             |        | 19/ | 0.00 | 0.02 |   |   |
| CC | 0043 costamere                                  | 3/294  | 232 | 166  | 741  | 3 |   |
|    | 034                                             |        | 71  | 473  | 179  |   |   |
|    | GO:                                             |        | 21/ | 0.00 | 0.03 |   |   |
| CC | 0005 Golgi lumen                                | 3/294  | 232 | 224  | 446  | 3 |   |
|    | 796                                             |        | 71  | 269  | 663  |   |   |

|    |                                  |        |     |      |      |   |
|----|----------------------------------|--------|-----|------|------|---|
|    | GO:                              |        | 192 | 0.00 | 0.04 |   |
| CC | 0043 axon terminus               | 8/294  | /23 | 315  | 547  | 8 |
|    | 679                              |        | 271 | 635  | 641  |   |
|    | GO:                              |        | 200 | 0.00 | 0.05 |   |
| CC | 0030 endocytic vesicle           | 8/294  | /23 | 403  | 478  | 8 |
|    | 139                              |        | 271 | 981  | 126  |   |
|    | GO:                              |        | 164 | 0.00 | 0.06 |   |
| CC | 0042 sarcolemma                  | 7/294  | /23 | 494  | 330  | 7 |
|    | 383                              |        | 271 | 264  | 052  |   |
|    | GO:                              |        | 454 | 0.00 | 0.06 | 1 |
| CC | 0045 apical part of cell         | 13/294 | /23 | 539  | 545  | 3 |
|    | 177                              |        | 271 | 45   | 127  |   |
|    | GO:                              |        | 34/ | 0.00 | 0.09 |   |
| CC | 0008 COP9 signalosome            | 3/294  | 232 | 894  | 817  | 3 |
|    | 180                              |        | 71  | 314  | 286  |   |
|    | GO:                              |        | 34/ | 0.00 | 0.09 |   |
| CC | 0031 dense core granule          | 3/294  | 232 | 894  | 817  | 3 |
|    | 045                              |        | 71  | 314  | 286  |   |
|    | GO:                              |        | 384 | 0.01 | 0.10 | 1 |
| CC | 0150 distal axon                 | 11/294 | /23 | 005  | 538  | 1 |
|    | 034                              |        | 271 | 731  | 526  |   |
|    | GO:                              |        | 37/ | 0.01 | 0.10 |   |
| CC | 0032 neuronal cell body membrane | 3/294  | 232 | 129  | 899  | 3 |
|    | 809                              |        | 71  | 498  | 576  |   |
|    | GO:                              |        | 69/ | 0.01 | 0.10 |   |
| CC | 0032 neuron projection membrane  | 4/294  | 232 | 134  | 899  | 4 |
|    | 589                              |        | 71  | 75   | 576  |   |
|    | GO:                              |        | 40/ | 0.01 | 0.12 |   |
| CC | 0044 cell body membrane          | 3/294  | 232 | 397  | 882  | 3 |
|    | 298                              |        | 71  | 048  | 25   |   |
|    | GO:                              |        | 16/ | 0.01 | 0.15 |   |
| CC | 0043 varicosity                  | 2/294  | 232 | 698  | 058  | 2 |
|    | 196                              |        | 71  | 433  | 98   |   |
|    | GO:                              |        | 421 | 0.01 | 0.15 | 1 |
| CC | 0005 nuclear envelope            | 11/294 | /23 | 872  | 987  | 1 |
|    | 635                              |        | 271 | 503  | 451  |   |
|    | GO:                              |        | 48/ | 0.02 | 0.18 |   |
| CC | 0032 dendrite membrane           | 3/294  | 232 | 272  | 709  | 3 |
|    | 590                              |        | 71  | 429  | 097  |   |
|    | GO:                              |        | 226 | 0.02 | 0.20 |   |
| CC | 0043 contractile fiber           | 7/294  | /23 | 521  | 047  | 7 |
|    | 292                              |        | 271 | 967  | 58   |   |

|    |                                            |        |     |      |      |   |
|----|--------------------------------------------|--------|-----|------|------|---|
|    | GO:                                        |        | 91/ | 0.02 | 0.21 |   |
| CC | 0043 terminal bouton                       | 4/294  | 232 | 833  | 151  | 4 |
|    | 195                                        |        | 71  | 98   | 077  |   |
|    | GO:                                        |        | 92/ | 0.02 | 0.21 |   |
| CC | 0070 extracellular exosome                 | 4/294  | 232 | 934  | 151  | 4 |
|    | 062                                        |        | 71  | 353  | 077  |   |
|    | GO:                                        |        | 395 | 0.02 | 0.21 |   |
| CC | 0031 cell leading edge                     | 10/294 | /23 | 936  | 151  | 1 |
|    | 252                                        |        | 271 | 04   | 077  | 0 |
|    | GO:                                        |        | 93/ | 0.03 | 0.21 |   |
| CC | 0005 rough endoplasmic reticulum           | 4/294  | 232 | 036  | 214  | 4 |
|    | 791                                        |        | 71  | 812  | 095  |   |
|    | GO:                                        |        | 460 | 0.03 | 0.22 |   |
| CC | 0005 transcription regulator complex       | 11/294 | /23 | 287  | 290  | 1 |
|    | 667                                        |        | 271 | 552  | 214  | 1 |
|    | GO:                                        |        | 246 | 0.03 | 0.24 |   |
| CC | 0031 nuclear membrane                      | 7/294  | /23 | 737  | 415  | 7 |
|    | 965                                        |        | 271 | 266  | 224  |   |
|    | GO:                                        |        | 100 | 0.03 | 0.24 |   |
| CC | 1903 extracellular vesicle                 | 4/294  | /23 | 812  | 415  | 4 |
|    | 561                                        |        | 271 | 788  | 224  |   |
|    | GO:                                        |        | 26/ | 0.04 | 0.26 |   |
| CC | 0045 clathrin-coated endocytic vesicle     | 2/294  | 232 | 236  | 392  | 2 |
|    | 334                                        |        | 71  | 131  | 967  |   |
|    | GO:                                        |        | 110 | 0.05 | 0.29 |   |
| CC | 0043 extracellular organelle               | 4/294  | /23 | 100  | 626  | 4 |
|    | 230                                        |        | 271 | 647  | 249  |   |
|    | GO:                                        |        | 29/ | 0.05 | 0.29 |   |
| CC | 0005 phosphatidylinositol 3-kinase complex | 2/294  | 232 | 163  | 626  | 2 |
|    | 942                                        |        | 71  | 612  | 249  |   |
|    | GO:                                        |        | 111 | 0.05 | 0.29 |   |
| CC | 0045 phagocytic vesicle                    | 4/294  | /23 | 241  | 626  | 4 |
|    | 335                                        |        | 271 | 012  | 249  |   |
|    | GO:                                        |        | 212 | 0.05 | 0.29 |   |
| CC | 0030 myofibril                             | 6/294  | /23 | 301  | 626  | 6 |
|    | 016                                        |        | 271 | 3    | 249  |   |
|    | GO:                                        |        | 161 | 0.05 | 0.29 |   |
| CC | 0005 focal adhesion                        | 5/294  | /23 | 397  | 626  | 5 |
|    | 925                                        |        | 271 | 659  | 249  |   |
|    | GO:                                        |        | 114 | 0.05 | 0.30 |   |
| CC | 0005 basement membrane                     | 4/294  | /23 | 674  | 422  | 4 |
|    | 604                                        |        | 271 | 642  | 195  |   |

|    |                                                |        |     |      |      |   |
|----|------------------------------------------------|--------|-----|------|------|---|
|    | GO:                                            |        | 70/ | 0.05 | 0.30 |   |
| CC | 0030 T-tubule                                  | 3/294  | 232 | 888  | 851  | 3 |
|    | 315                                            |        | 71  | 471  | 082  |   |
|    | GO:                                            |        | 33/ | 0.06 | 0.32 |   |
| CC | 0005 gap junction                              | 2/294  | 232 | 499  | 899  | 2 |
|    | 921                                            |        | 71  | 875  | 094  |   |
|    | GO:                                            |        | 460 | 0.06 | 0.32 |   |
| CC | 0000 lytic vacuole                             | 10/294 | /23 | 832  | 899  | 1 |
|    | 323                                            |        | 271 | 418  | 094  | 0 |
|    | GO:                                            |        | 460 | 0.06 | 0.32 |   |
| CC | 0005 lysosome                                  | 10/294 | /23 | 832  | 899  | 1 |
|    | 764                                            |        | 271 | 418  | 094  | 0 |
|    | GO:                                            |        | 34/ | 0.06 | 0.32 |   |
| CC | 0097 sperm midpiece                            | 2/294  | 232 | 850  | 899  | 2 |
|    | 225                                            |        | 71  | 222  | 094  |   |
|    | GO:                                            |        | 174 | 0.07 | 0.33 |   |
| CC | 0030 cell-substrate junction                   | 5/294  | /23 | 034  | 092  | 5 |
|    | 055                                            |        | 271 | 111  | 811  |   |
|    | GO:                                            |        | 125 | 0.07 | 0.34 |   |
| CC | 0001 fibrillar center                          | 4/294  | /23 | 423  | 224  | 4 |
|    | 650                                            |        | 271 | 082  | 313  |   |
|    | GO:                                            |        | 350 | 0.07 | 0.35 |   |
| CC | 0016 apical plasma membrane                    | 8/294  | /23 | 745  | 012  | 8 |
|    | 324                                            |        | 271 | 939  | 604  |   |
|    | GO:                                            |        | 39/ | 0.08 | 0.38 |   |
| CC | 0098 protein complex involved in cell adhesion | 2/294  | 232 | 689  | 520  | 2 |
|    | 636                                            |        | 71  | 066  | 355  |   |
|    | GO:                                            |        | 85/ | 0.09 | 0.38 |   |
| CC | 0044 cell-cell contact zone                    | 3/294  | 232 | 287  | 948  | 3 |
|    | 291                                            |        | 71  | 394  | 823  |   |
|    | GO:                                            |        | 85/ | 0.09 | 0.38 |   |
| CC | 0044 main axon                                 | 3/294  | 232 | 287  | 948  | 3 |
|    | 304                                            |        | 71  | 394  | 823  |   |
|    | GO:                                            |        | 136 | 0.09 | 0.38 |   |
| CC | 0005 actin filament                            | 4/294  | /23 | 411  | 948  | 4 |
|    | 884                                            |        | 271 | 516  | 823  |   |
|    | GO:                                            |        | 41/ | 0.09 | 0.38 |   |
| CC | 0001 immunological synapse                     | 2/294  | 232 | 461  | 948  | 2 |
|    | 772                                            |        | 71  | 54   | 823  |   |
|    | GO:                                            |        | 198 | 0.10 | 0.43 |   |
| CC | 0031 anchored component of membrane            | 5/294  | /23 | 687  | 225  | 5 |
|    | 225                                            |        | 271 | 992  | 673  |   |

|    |                                                                    |       |     |      |      |   |
|----|--------------------------------------------------------------------|-------|-----|------|------|---|
|    | GO:                                                                |       | 93/ | 0.11 | 0.45 |   |
| CC | 0030 filopodium                                                    | 3/294 | 232 | 364  | 167  | 3 |
|    | 175                                                                |       | 71  | 12   | 736  |   |
|    | GO:                                                                |       | 10/ | 0.11 | 0.45 |   |
| CC | 0033 endoplasmic reticulum-Golgi intermediate compartment membrane | 1/294 | 232 | 941  | 879  | 1 |
|    | 116                                                                |       | 71  | 348  | 917  |   |
|    | GO:                                                                |       | 10/ | 0.11 | 0.45 |   |
| CC | 0072 blood microparticle                                           | 1/294 | 232 | 941  | 879  | 1 |
|    | 562                                                                |       | 71  | 348  | 917  |   |
|    | GO:                                                                |       | 150 | 0.12 | 0.46 |   |
| CC | 0031 leading edge membrane                                         | 4/294 | /23 | 263  | 221  | 4 |
|    | 256                                                                |       | 271 | 492  | 837  |   |
|    | GO:                                                                |       | 330 | 0.12 | 0.46 |   |
| CC | 0045 postsynaptic membrane                                         | 7/294 | /23 | 622  | 221  | 7 |
|    | 211                                                                |       | 271 | 78   | 837  |   |
|    | GO:                                                                |       | 98/ | 0.12 | 0.46 |   |
| CC | 0031 neuromuscular junction                                        | 3/294 | 232 | 743  | 221  | 3 |
|    | 594                                                                |       | 71  | 256  | 837  |   |
|    | GO:                                                                |       | 11/ | 0.13 | 0.46 |   |
| CC | 0035 CD40 receptor complex                                         | 1/294 | 232 | 054  | 221  | 1 |
|    | 631                                                                |       | 71  | 337  | 837  |   |
|    | GO:                                                                |       | 11/ | 0.13 | 0.46 |   |
| CC | 0099 perisynaptic space                                            | 1/294 | 232 | 054  | 221  | 1 |
|    | 544                                                                |       | 71  | 337  | 837  |   |
|    | GO:                                                                |       | 213 | 0.13 | 0.46 |   |
| CC | 0043 myelin sheath                                                 | 5/294 | /23 | 361  | 221  | 5 |
|    | 209                                                                |       | 271 | 395  | 837  |   |
|    | GO:                                                                |       | 101 | 0.13 | 0.46 |   |
| CC | 0005 microvillus                                                   | 3/294 | /23 | 598  | 221  | 3 |
|    | 902                                                                |       | 271 | 048  | 837  |   |
|    | GO:                                                                |       | 12/ | 0.14 | 0.46 |   |
| CC | 0034 endoplasmic reticulum chaperone complex                       | 1/294 | 232 | 153  | 221  | 1 |
|    | 663                                                                |       | 71  | 307  | 837  |   |
|    | GO:                                                                |       | 12/ | 0.14 | 0.46 |   |
| CC | 0036 CatSper complex                                               | 1/294 | 232 | 153  | 221  | 1 |
|    | 128                                                                |       | 71  | 307  | 837  |   |
|    | GO:                                                                |       | 12/ | 0.14 | 0.46 |   |
| CC | 0043 NADPH oxidase complex                                         | 1/294 | 232 | 153  | 221  | 1 |
|    | 020                                                                |       | 71  | 307  | 837  |   |
|    | GO:                                                                |       | 159 | 0.14 | 0.46 |   |
| CC | 0090 RNA polymerase II transcription regulator complex             | 4/294 | /23 | 268  | 221  | 4 |
|    | 575                                                                |       | 271 | 829  | 837  |   |



|    |                                        |       |     |      |      |   |
|----|----------------------------------------|-------|-----|------|------|---|
|    | GO:                                    |       | 221 | 0.14 | 0.46 |   |
| CC | 0098 actin-based cell projection       | 5/294 | /23 | 898  | 221  | 5 |
|    | 858                                    |       | 271 | 514  | 837  |   |
|    | GO:                                    |       | 13/ | 0.15 | 0.46 |   |
| CC | 0002 zona pellucida receptor complex   | 1/294 | 232 | 238  | 221  | 1 |
|    | 199                                    |       | 71  | 432  | 837  |   |
|    | GO:                                    |       | 13/ | 0.15 | 0.46 |   |
| CC | 0005 fascia adherens                   | 1/294 | 232 | 238  | 221  | 1 |
|    | 916                                    |       | 71  | 432  | 837  |   |
|    | GO:                                    |       | 13/ | 0.15 | 0.46 |   |
| CC | 0034 secretory granule lumen           | 1/294 | 232 | 238  | 221  | 1 |
|    | 774                                    |       | 71  | 432  | 837  |   |
|    | GO:                                    |       | 13/ | 0.15 | 0.46 |   |
| CC | 0060 cytoplasmic vesicle lumen         | 1/294 | 232 | 238  | 221  | 1 |
|    | 205                                    |       | 71  | 432  | 837  |   |
|    | GO:                                    |       | 56/ | 0.15 | 0.47 |   |
| CC | 0098 neurotransmitter receptor complex | 2/294 | 232 | 762  | 191  | 2 |
|    | 878                                    |       | 71  | 667  | 033  |   |
|    | GO:                                    |       | 14/ | 0.16 | 0.47 |   |
| CC | 0030 mitochondrial crista              | 1/294 | 232 | 309  | 593  | 1 |
|    | 061                                    |       | 71  | 887  | 141  |   |
|    | GO:                                    |       | 14/ | 0.16 | 0.47 |   |
| CC | 0098 postsynaptic actin cytoskeleton   | 1/294 | 232 | 309  | 593  | 1 |
|    | 871                                    |       | 71  | 887  | 141  |   |
|    | GO:                                    |       | 15/ | 0.17 | 0.49 |   |
| CC | 0031 vesicle lumen                     | 1/294 | 232 | 367  | 956  | 1 |
|    | 983                                    |       | 71  | 843  | 851  |   |
|    | GO:                                    |       | 60/ | 0.17 | 0.49 |   |
| CC | 0009 basal plasma membrane             | 2/294 | 232 | 553  | 956  | 2 |
|    | 925                                    |       | 71  | 332  | 851  |   |
|    | GO:                                    |       | 497 | 0.17 | 0.50 |   |
| CC | 0015 actin cytoskeleton                | 9/294 | /23 | 951  | 466  | 9 |
|    | 629                                    |       | 271 | 15   | 005  |   |
|    | GO:                                    |       | 16/ | 0.18 | 0.50 |   |
| CC | 0072 meiotic spindle                   | 1/294 | 232 | 412  | 467  | 1 |
|    | 687                                    |       | 71  | 471  | 88   |   |
|    | GO:                                    |       | 62/ | 0.18 | 0.50 |   |
| CC | 0014 intercalated disc                 | 2/294 | 232 | 460  | 467  | 2 |
|    | 704                                    |       | 71  | 4    | 88   |   |
|    | GO:                                    |       | 239 | 0.18 | 0.50 |   |
| CC | 0008 synaptic vesicle                  | 5/294 | /23 | 608  | 467  | 5 |
|    | 021                                    |       | 271 | 59   | 88   |   |

|    |                                                             |       |     |      |      |   |
|----|-------------------------------------------------------------|-------|-----|------|------|---|
|    | GO:                                                         |       | 17/ | 0.19 | 0.52 |   |
| CC | 0005 interstitial matrix                                    | 1/294 | 232 | 443  | 120  | 1 |
|    | 614                                                         |       | 71  | 936  | 221  |   |
|    | GO:                                                         |       | 66/ | 0.20 | 0.53 |   |
| CC | 0016 lateral plasma membrane                                | 2/294 | 232 | 293  | 771  | 2 |
|    | 328                                                         |       | 71  | 309  | 745  |   |
|    | GO:                                                         |       | 19/ | 0.21 | 0.54 |   |
| CC | 0031 platelet alpha granule                                 | 1/294 | 232 | 468  | 808  | 1 |
|    | 091                                                         |       | 71  | 042  | 609  |   |
|    | GO:                                                         |       | 19/ | 0.21 | 0.54 |   |
| CC | 0099 postsynaptic cytoskeleton                              | 1/294 | 232 | 468  | 808  | 1 |
|    | 571                                                         |       | 71  | 042  | 609  |   |
|    | GO:                                                         |       | 320 | 0.21 | 0.54 |   |
| CC | 0016 nuclear speck                                          | 6/294 | /23 | 955  | 808  | 6 |
|    | 607                                                         |       | 271 | 787  | 609  |   |
|    | GO:                                                         |       | 129 | 0.22 | 0.54 |   |
| CC | 0005 intermediate filament                                  | 3/294 | /23 | 346  | 808  | 3 |
|    | 882                                                         |       | 271 | 029  | 609  |   |
|    | GO:                                                         |       | 20/ | 0.22 | 0.54 |   |
| CC | 0097 astrocyte projection                                   | 1/294 | 232 | 461  | 808  | 1 |
|    | 449                                                         |       | 71  | 005  | 609  |   |
|    | GO:                                                         |       | 259 | 0.23 | 0.54 |   |
| CC | 0016 basolateral plasma membrane                            | 5/294 | /23 | 074  | 808  | 5 |
|    | 323                                                         |       | 271 | 615  | 609  |   |
|    | GO:                                                         |       | 72/ | 0.23 | 0.54 |   |
| CC | 0005 endoplasmic reticulum-Golgi intermediate compartment   | 2/294 | 232 | 076  | 808  | 2 |
|    | 793                                                         |       | 71  | 752  | 609  |   |
|    | GO:                                                         |       | 195 | 0.23 | 0.54 |   |
| CC | 0043 dendritic spine                                        | 4/294 | /23 | 344  | 808  | 4 |
|    | 197                                                         |       | 271 | 429  | 609  |   |
|    | GO:                                                         |       | 21/ | 0.23 | 0.54 |   |
| CC | 0005 nuclear outer membrane                                 | 1/294 | 232 | 441  | 808  | 1 |
|    | 640                                                         |       | 71  | 456  | 609  |   |
|    | GO:                                                         |       | 21/ | 0.23 | 0.54 |   |
| CC | 0030 axolemma                                               | 1/294 | 232 | 441  | 808  | 1 |
|    | 673                                                         |       | 71  | 456  | 609  |   |
|    | GO:                                                         |       | 21/ | 0.23 | 0.54 |   |
| CC | 0031 anchored component of external side of plasma membrane | 1/294 | 232 | 441  | 808  | 1 |
|    | 362                                                         |       | 71  | 456  | 609  |   |
|    | GO:                                                         |       | 261 | 0.23 | 0.54 |   |
| CC | 0070 exocytic vesicle                                       | 5/294 | /23 | 537  | 808  | 5 |
|    | 382                                                         |       | 271 | 67   | 609  |   |

|    |                                                              |       |     |      |      |   |
|----|--------------------------------------------------------------|-------|-----|------|------|---|
|    | GO:                                                          |       | 22/ | 0.24 | 0.55 |   |
| CC | 0001 phagocytic cup                                          | 1/294 | 232 | 409  | 164  | 1 |
|    | 891                                                          |       | 71  | 552  | 178  |   |
|    | GO:                                                          |       | 75/ | 0.24 | 0.55 |   |
| CC | 0016 PML body                                                | 2/294 | 232 | 478  | 164  | 2 |
|    | 605                                                          |       | 71  | 069  | 178  |   |
|    | GO:                                                          |       | 200 |      | 0.55 |   |
| CC | 0044 neuron spine                                            | 4/294 | /23 | 0.24 | 164  | 4 |
|    | 309                                                          |       | 271 | 705  | 178  |   |
|    | GO:                                                          |       | 23/ | 0.25 | 0.55 |   |
| CC | 0001 male germ cell nucleus                                  | 1/294 | 232 | 365  | 164  | 1 |
|    | 673                                                          |       | 71  | 446  | 178  |   |
|    | GO:                                                          |       | 23/ | 0.25 | 0.55 |   |
| CC | 0005 striated muscle thin filament                           | 1/294 | 232 | 365  | 164  | 1 |
|    | 865                                                          |       | 71  | 446  | 178  |   |
|    | GO:                                                          |       | 23/ | 0.25 | 0.55 |   |
| CC | 0016 apicolateral plasma membrane                            | 1/294 | 232 | 365  | 164  | 1 |
|    | 327                                                          |       | 71  | 446  | 178  |   |
|    | GO:                                                          |       | 23/ | 0.25 | 0.55 |   |
| CC | 0097 sperm plasma membrane                                   | 1/294 | 232 | 365  | 164  | 1 |
|    | 524                                                          |       | 71  | 446  | 178  |   |
|    | GO:                                                          |       | 339 | 0.25 | 0.55 |   |
| CC | 0030 transport vesicle                                       | 6/294 | /23 | 883  | 642  | 6 |
|    | 133                                                          |       | 271 | 076  | 059  |   |
|    | GO:                                                          |       | 24/ | 0.26 | 0.55 |   |
| CC | 0031 intrinsic component of external side of plasma membrane | 1/294 | 232 | 309  | 642  | 1 |
|    | 233                                                          |       | 71  | 293  | 059  |   |
|    | GO:                                                          |       | 24/ | 0.26 | 0.55 |   |
| CC | 0035 transcriptionally active chromatin                      | 1/294 | 232 | 309  | 642  | 1 |
|    | 327                                                          |       | 71  | 293  | 059  |   |
|    | GO:                                                          |       | 145 | 0.27 | 0.57 |   |
| CC | 0005 peroxisome                                              | 3/294 | /23 | 748  | 579  | 3 |
|    | 777                                                          |       | 271 | 806  | 811  |   |
|    | GO:                                                          |       | 145 | 0.27 | 0.57 |   |
| CC | 0042 microbody                                               | 3/294 | /23 | 748  | 579  | 3 |
|    | 579                                                          |       | 271 | 806  | 811  |   |
|    | GO:                                                          |       | 26/ | 0.28 | 0.57 |   |
| CC | 0030 phagocytic vesicle membrane                             | 1/294 | 232 | 161  | 579  | 1 |
|    | 670                                                          |       | 71  | 449  | 811  |   |
|    | GO:                                                          |       | 83/ | 0.28 | 0.57 |   |
| CC | 0045 basal part of cell                                      | 2/294 | 232 | 224  | 579  | 2 |
|    | 178                                                          |       | 71  | 624  | 811  |   |

|    |                                                    |       |     |      |      |   |
|----|----------------------------------------------------|-------|-----|------|------|---|
|    | GO:                                                |       | 27/ | 0.29 | 0.58 |   |
| CC | 0002 podosome                                      | 1/294 | 232 | 070  | 273  | 1 |
|    | 102                                                |       | 71  | 054  | 152  |   |
|    | GO:                                                |       | 27/ | 0.29 | 0.58 |   |
| CC | 0036 myofilament                                   | 1/294 | 232 | 070  | 273  | 1 |
|    | 379                                                |       | 71  | 054  | 152  |   |
|    | GO:                                                |       | 88/ | 0.30 | 0.60 |   |
| CC | 0030 secretory granule membrane                    | 2/294 | 232 | 560  | 732  | 2 |
|    | 667                                                |       | 71  | 31   | 377  |   |
|    | GO:                                                |       | 29/ | 0.30 | 0.60 |   |
| CC | 0044 calyx of Held                                 | 1/294 | 232 | 853  | 790  | 1 |
|    | 305                                                |       | 71  | 049  | 083  |   |
|    | GO:                                                |       | 30/ | 0.31 | 0.61 |   |
| CC | 0043 germ cell nucleus                             | 1/294 | 232 | 727  | 462  | 1 |
|    | 073                                                |       | 71  | 724  | 819  |   |
|    | GO:                                                |       | 30/ | 0.31 | 0.61 |   |
| CC | 0061 sperm head                                    | 1/294 | 232 | 727  | 462  | 1 |
|    | 827                                                |       | 71  | 724  | 819  |   |
|    | GO:                                                |       | 158 | 0.32 | 0.61 |   |
| CC | 0043 apical junction complex                       | 3/294 | /23 | 225  | 905  | 3 |
|    | 296                                                |       | 271 | 008  | 936  |   |
|    | GO:                                                |       | 31/ | 0.32 | 0.62 |   |
| CC | 0099 postsynaptic density, intracellular component | 1/294 | 232 | 591  | 092  | 1 |
|    | 092                                                |       | 71  | 373  | 306  |   |
|    | GO:                                                |       | 165 | 0.34 | 0.65 |   |
| CC | 0045 intermediate filament cytoskeleton            | 3/294 | /23 | 641  | 456  | 3 |
|    | 111                                                |       | 271 | 139  | 51   |   |
|    | GO:                                                |       | 34/ | 0.35 | 0.65 |   |
| CC | 0097 sperm principal piece                         | 1/294 | 232 | 117  | 752  | 1 |
|    | 228                                                |       | 71  | 532  | 033  |   |
|    | GO:                                                |       | 99/ | 0.35 | 0.65 |   |
| CC | 1902 protein kinase complex                        | 2/294 | 232 | 638  | 752  | 2 |
|    | 911                                                |       | 71  | 101  | 033  |   |
|    | GO:                                                |       | 35/ | 0.35 | 0.65 |   |
| CC | 0015 Cajal body                                    | 1/294 | 232 | 938  | 752  | 1 |
|    | 030                                                |       | 71  | 44   | 033  |   |
|    | GO:                                                |       | 35/ | 0.35 | 0.65 |   |
| CC | 0097 glial cell projection                         | 1/294 | 232 | 938  | 752  | 1 |
|    | 386                                                |       | 71  | 44   | 033  |   |
|    | GO:                                                |       | 241 | 0.36 | 0.65 |   |
| CC | 0061 transferase complex, transferring             | 4/294 | /23 | 288  | 869  | 4 |
|    | 695 phosphorus-containing groups                   |       | 271 | 597  | 894  |   |

|    |                                                 |       |     |      |      |   |
|----|-------------------------------------------------|-------|-----|------|------|---|
|    | GO:                                             |       | 36/ | 0.36 | 0.66 |   |
| CC | 0005 smooth endoplasmic reticulum               | 1/294 | 232 | 748  | 184  | 1 |
|    | 790                                             |       | 71  | 997  | 46   |   |
|    | GO:                                             |       | 37/ | 0.37 | 0.66 |   |
| CC | 0099 postsynaptic specialization, intracellular | 1/294 | 232 | 549  | 978  | 1 |
|    | 091 component                                   |       | 71  | 333  | 786  |   |
|    | GO:                                             |       | 104 | 0.37 | 0.66 |   |
| CC | 0031 extrinsic component of cytoplasmic side of | 2/294 | /23 | 903  | 978  | 2 |
|    | 234 plasma membrane                             |       | 271 | 989  | 786  |   |
|    | GO:                                             |       | 38/ | 0.38 | 0.66 |   |
| CC | 0016 aggresome                                  | 1/294 | 232 | 339  | 978  | 1 |
|    | 235                                             |       | 71  | 575  | 786  |   |
|    | GO:                                             |       | 470 | 0.38 | 0.66 |   |
| CC | 0097 synaptic membrane                          | 7/294 | /23 | 352  | 978  | 7 |
|    | 060                                             |       | 271 | 236  | 786  |   |
|    | GO:                                             |       | 106 | 0.38 | 0.67 |   |
| CC | 0030 clathrin-coated vesicle                    | 2/294 | /23 | 801  | 253  | 2 |
|    | 136                                             |       | 271 | 105  | 201  |   |
|    | GO:                                             |       | 40/ | 0.39 | 0.67 |   |
| CC | 0005 voltage-gated calcium channel complex      | 1/294 | 232 | 890  | 910  | 1 |
|    | 891                                             |       | 71  | 287  | 451  |   |
|    | GO:                                             |       | 40/ | 0.39 | 0.67 |   |
| CC | 0031 filamentous actin                          | 1/294 | 232 | 890  | 910  | 1 |
|    | 941                                             |       | 71  | 287  | 451  |   |
|    | GO:                                             |       | 41/ | 0.40 | 0.67 |   |
| CC | 0032 cleavage furrow                            | 1/294 | 232 | 651  | 910  | 1 |
|    | 154                                             |       | 71  | 006  | 451  |   |
|    | GO:                                             |       | 42/ | 0.41 | 0.67 |   |
| CC | 0005 nuclear heterochromatin                    | 1/294 | 232 | 402  | 910  | 1 |
|    | 720                                             |       | 71  | 13   | 451  |   |
|    | GO:                                             |       | 186 | 0.41 | 0.67 |   |
| CC | 0032 protein-DNA complex                        | 3/294 | /23 | 808  | 910  | 3 |
|    | 993                                             |       | 271 | 565  | 451  |   |
|    | GO:                                             |       | 186 | 0.41 | 0.67 |   |
| CC | 0098 cytoplasmic side of membrane               | 3/294 | /23 | 808  | 910  | 3 |
|    | 562                                             |       | 271 | 565  | 451  |   |
|    | GO:                                             |       | 43/ | 0.42 | 0.67 |   |
| CC | 0005 peroxisomal membrane                       | 1/294 | 232 | 143  | 910  | 1 |
|    | 778                                             |       | 71  | 779  | 451  |   |
|    | GO:                                             |       | 43/ | 0.42 | 0.67 |   |
| CC | 0031 microbody membrane                         | 1/294 | 232 | 143  | 910  | 1 |
|    | 903                                             |       | 71  | 779  | 451  |   |

|    |                                                      |       |     |      |      |   |
|----|------------------------------------------------------|-------|-----|------|------|---|
|    | GO:                                                  |       | 188 | 0.42 | 0.67 |   |
| CC | 0030 sarcomere                                       | 3/294 | /23 | 479  | 910  | 3 |
|    | 017                                                  |       | 271 | 651  | 451  |   |
|    | GO:                                                  |       | 44/ | 0.42 | 0.67 |   |
| CC | 0030 endocytic vesicle membrane                      | 1/294 | 232 | 876  | 910  | 1 |
|    | 666                                                  |       | 71  | 073  | 451  |   |
|    | GO:                                                  |       | 116 | 0.43 | 0.67 |   |
| CC | 0030 synaptic vesicle membrane                       | 2/294 | /23 | 195  | 910  | 2 |
|    | 672                                                  |       | 271 | 377  | 451  |   |
|    | GO:                                                  |       | 116 | 0.43 | 0.67 |   |
| CC | 0099 integral component of presynaptic membrane      | 2/294 | /23 | 195  | 910  | 2 |
|    | 056                                                  |       | 271 | 377  | 451  |   |
|    | GO:                                                  |       | 116 | 0.43 | 0.67 |   |
| CC | 0099 exocytic vesicle membrane                       | 2/294 | /23 | 195  | 910  | 2 |
|    | 501                                                  |       | 271 | 377  | 451  |   |
|    | GO:                                                  |       | 45/ | 0.43 | 0.67 |   |
| CC | 0005 nuclear inner membrane                          | 1/294 | 232 | 599  | 910  | 1 |
|    | 637                                                  |       | 71  | 13   | 451  |   |
|    | GO:                                                  |       | 45/ | 0.43 | 0.67 |   |
| CC | 0030 integral component of synaptic vesicle membrane | 1/294 | 232 | 599  | 910  | 1 |
|    | 285                                                  |       | 71  | 13   | 451  |   |
|    | GO:                                                  |       | 46/ | 0.44 | 0.68 |   |
| CC | 0022 cytosolic small ribosomal subunit               | 1/294 | 232 | 313  | 102  | 1 |
|    | 627                                                  |       | 71  | 065  | 184  |   |
|    | GO:                                                  |       | 46/ | 0.44 | 0.68 |   |
| CC | 0034 chloride channel complex                        | 1/294 | 232 | 313  | 102  | 1 |
|    | 707                                                  |       | 71  | 065  | 184  |   |
|    | GO:                                                  |       | 196 | 0.45 | 0.68 |   |
| CC | 0019 outer membrane                                  | 3/294 | /23 | 135  | 454  | 3 |
|    | 867                                                  |       | 271 | 931  | 077  |   |
|    | GO:                                                  |       | 196 | 0.45 | 0.68 |   |
| CC | 0031 organelle outer membrane                        | 3/294 | /23 | 135  | 454  | 3 |
|    | 968                                                  |       | 271 | 931  | 077  |   |
|    | GO:                                                  |       | 125 | 0.47 | 0.70 |   |
| CC | 0030 Z disc                                          | 2/294 | /23 | 002  | 474  | 2 |
|    | 018                                                  |       | 271 | 872  | 982  |   |
|    | GO:                                                  |       | 50/ | 0.47 | 0.70 |   |
| CC | 0000 euchromatin                                     | 1/294 | 232 | 079  | 474  | 1 |
|    | 791                                                  |       | 71  | 863  | 982  |   |
|    | GO:                                                  |       | 128 | 0.48 | 0.71 |   |
| CC | 0098 intrinsic component of presynaptic membrane     | 2/294 | /23 | 237  | 742  | 2 |
|    | 889                                                  |       | 271 | 952  | 692  |   |

|    |                                            |       |     |      |      |   |
|----|--------------------------------------------|-------|-----|------|------|---|
|    | GO:                                        |       | 209 | 0.49 | 0.72 |   |
| CC | 0030 growth cone                           | 3/294 | /23 | 339  | 911  | 3 |
|    | 426                                        |       | 271 | 94   | 248  |   |
|    | GO:                                        |       | 216 | 0.51 | 0.74 |   |
| CC | 0030 site of polarized growth              | 3/294 | /23 | 537  | 050  | 3 |
|    | 427                                        |       | 271 | 002  | 305  |   |
|    | GO:                                        |       | 296 | 0.51 | 0.74 |   |
| CC | 0034 ion channel complex                   | 4/294 | /23 | 602  | 050  | 4 |
|    | 702                                        |       | 271 | 315  | 305  |   |
|    | GO:                                        |       | 137 | 0.51 | 0.74 |   |
| CC | 0005 bicellular tight junction             | 2/294 | /23 | 834  | 050  | 2 |
|    | 923                                        |       | 271 | 542  | 305  |   |
|    | GO:                                        |       | 218 | 0.52 | 0.74 |   |
| CC | 0036 cytoplasmic ribonucleoprotein granule | 3/294 | /23 | 155  | 050  | 3 |
|    | 464                                        |       | 271 | 398  | 305  |   |
|    | GO:                                        |       | 138 | 0.52 | 0.74 |   |
| CC | 0031 I band                                | 2/294 | /23 | 223  | 050  | 2 |
|    | 674                                        |       | 271 | 82   | 305  |   |
|    | GO:                                        |       | 219 | 0.52 | 0.74 |   |
| CC | 0005 late endosome                         | 3/294 | /23 | 462  | 050  | 3 |
|    | 770                                        |       | 271 | 989  | 305  |   |
|    | GO:                                        |       | 141 | 0.53 | 0.74 |   |
| CC | 0036 sperm flagellum                       | 2/294 | /23 | 378  | 050  | 2 |
|    | 126                                        |       | 271 | 971  | 305  |   |
|    | GO:                                        |       | 222 | 0.53 | 0.74 |   |
| CC | 0034 cation channel complex                | 3/294 | /23 | 379  | 050  | 3 |
|    | 703                                        |       | 271 | 223  | 305  |   |
|    | GO:                                        |       | 304 | 0.53 | 0.74 |   |
| CC | 0031 cell projection membrane              | 4/294 | /23 | 699  | 050  | 4 |
|    | 253                                        |       | 271 | 391  | 305  |   |
|    | GO:                                        |       | 61/ | 0.54 | 0.74 |   |
| CC | 0032 cell division site                    | 1/294 | 232 | 002  | 050  | 1 |
|    | 153                                        |       | 71  | 185  | 305  |   |
|    | GO:                                        |       | 61/ | 0.54 | 0.74 |   |
| CC | 0034 calcium channel complex               | 1/294 | 232 | 002  | 050  | 1 |
|    | 704                                        |       | 71  | 185  | 305  |   |
|    | GO:                                        |       | 146 | 0.55 | 0.74 |   |
| CC | 0070 tight junction                        | 2/294 | /23 | 261  | 050  | 2 |
|    | 160                                        |       | 271 | 467  | 305  |   |
|    | GO:                                        |       | 229 | 0.55 | 0.74 |   |
| CC | 0035 ribonucleoprotein granule             | 3/294 | /23 | 477  | 050  | 3 |
|    | 770                                        |       | 271 | 862  | 305  |   |

|    |                                                           |       |     |      |      |   |
|----|-----------------------------------------------------------|-------|-----|------|------|---|
|    | GO:                                                       |       | 147 | 0.55 | 0.74 |   |
| CC | 0030 midbody                                              | 2/294 | /23 | 631  | 050  | 2 |
|    | 496                                                       |       | 271 | 493  | 305  |   |
|    | GO:                                                       |       | 147 | 0.55 | 0.74 |   |
| CC | 0030 transport vesicle membrane                           | 2/294 | /23 | 631  | 050  | 2 |
|    | 658                                                       |       | 271 | 493  | 305  |   |
|    | GO:                                                       |       | 64/ | 0.55 | 0.74 |   |
| CC | 0098 intrinsic component of synaptic vesicle membrane     | 1/294 | 232 | 728  | 050  | 1 |
|    | 563                                                       |       | 71  | 167  | 305  |   |
|    | GO:                                                       |       | 312 | 0.55 | 0.74 |   |
| CC | 1902 transmembrane transporter complex                    | 4/294 | /23 | 750  | 050  | 4 |
|    | 495                                                       |       | 271 | 209  | 305  |   |
|    | GO:                                                       |       | 149 | 0.56 | 0.74 |   |
| CC | 0001 ruffle                                               | 2/294 | /23 | 365  | 050  | 2 |
|    | 726                                                       |       | 271 | 03   | 305  |   |
|    | GO:                                                       |       | 400 | 0.57 | 0.74 |   |
| CC | 0014 postsynaptic density                                 | 5/294 | /23 | 158  | 050  | 5 |
|    | 069                                                       |       | 271 | 41   | 305  |   |
|    | GO:                                                       |       | 67/ | 0.57 | 0.74 |   |
| CC | 0032 stereocilium bundle                                  | 1/294 | 232 | 389  | 050  | 1 |
|    | 421                                                       |       | 71  | 597  | 305  |   |
|    | GO:                                                       |       | 319 | 0.57 | 0.74 |   |
| CC | 1990 transporter complex                                  | 4/294 | /23 | 504  | 050  | 4 |
|    | 351                                                       |       | 271 | 242  | 305  |   |
|    | GO:                                                       |       | 320 | 0.57 | 0.74 |   |
| CC | 0019 extrinsic component of membrane                      | 4/294 | /23 | 751  | 050  | 4 |
|    | 898                                                       |       | 271 | 621  | 305  |   |
|    | GO:                                                       |       | 153 | 0.57 | 0.74 |   |
| CC | 0030 integral component of endoplasmic reticulum membrane | 2/294 | /23 | 805  | 050  | 2 |
|    | 176                                                       |       | 271 | 939  | 305  |   |
|    | GO:                                                       |       | 154 | 0.58 | 0.74 |   |
| CC | 0097 9+2 motile cilium                                    | 2/294 | /23 | 160  | 050  | 2 |
|    | 729                                                       |       | 271 | 698  | 305  |   |
|    | GO:                                                       |       | 405 | 0.58 | 0.74 |   |
| CC | 0032 asymmetric synapse                                   | 5/294 | /23 | 262  | 050  | 5 |
|    | 279                                                       |       | 271 | 202  | 305  |   |
|    | GO:                                                       |       | 69/ | 0.58 | 0.74 |   |
| CC | 0005 clathrin-coated pit                                  | 1/294 | 232 | 462  | 050  | 1 |
|    | 905                                                       |       | 71  | 546  | 305  |   |
|    | GO:                                                       |       | 71/ | 0.59 | 0.74 |   |
| CC | 0099 integral component of postsynaptic density membrane  | 1/294 | 232 | 508  | 963  | 1 |
|    | 061                                                       |       | 71  | 568  | 339  |   |



|    |                                                  |       |     |      |      |   |  |
|----|--------------------------------------------------|-------|-----|------|------|---|--|
|    | GO:                                              |       | 73/ | 0.60 | 0.75 |   |  |
| CC | 0005 autophagosome                               | 1/294 | 232 | 528  | 121  | 1 |  |
|    | 776                                              |       | 71  | 336  | 792  |   |  |
|    | GO:                                              |       | 161 | 0.60 | 0.75 |   |  |
| CC | 0031 intrinsic component of endoplasmic          | 2/294 | /23 | 582  | 121  | 2 |  |
|    | 227 reticulum membrane                           |       | 271 | 587  | 792  |   |  |
|    | GO:                                              |       | 74/ | 0.61 | 0.75 |   |  |
| CC | 0005 polysome                                    | 1/294 | 232 | 028  | 121  | 1 |  |
|    | 844                                              |       | 71  | 58   | 792  |   |  |
|    | GO:                                              |       | 337 | 0.61 | 0.75 |   |  |
| CC | 0030 cytoplasmic vesicle membrane                | 4/294 | /23 | 828  | 121  | 4 |  |
|    | 659                                              |       | 271 | 977  | 792  |   |  |
|    | GO:                                              |       | 76/ | 0.62 | 0.75 |   |  |
| CC | 0000 P-body                                      | 1/294 | 232 | 010  | 121  | 1 |  |
|    | 932                                              |       | 71  | 193  | 792  |   |  |
|    | GO:                                              |       | 76/ | 0.62 | 0.75 |   |  |
| CC | 0016 inclusion body                              | 1/294 | 232 | 010  | 121  | 1 |  |
|    | 234                                              |       | 71  | 193  | 792  |   |  |
|    | GO:                                              |       | 77/ | 0.62 | 0.75 |   |  |
| CC | 0046 anchored component of plasma membrane       | 1/294 | 232 | 491  | 121  | 1 |  |
|    | 658                                              |       | 71  | 719  | 792  |   |  |
|    | GO:                                              |       | 77/ | 0.62 | 0.75 |   |  |
| CC | 0099 intrinsic component of postsynaptic density | 1/294 | 232 | 491  | 121  | 1 |  |
|    | 146 membrane                                     |       | 71  | 719  | 792  |   |  |
|    | GO:                                              |       | 78/ | 0.62 | 0.75 |   |  |
| CC | 0015 small ribosomal subunit                     | 1/294 | 232 | 967  | 121  | 1 |  |
|    | 935                                              |       | 71  | 163  | 792  |   |  |
|    | GO:                                              |       | 169 | 0.63 | 0.75 |   |  |
| CC | 0009 cytoplasmic side of plasma membrane         | 2/294 | /23 | 218  | 121  | 2 |  |
|    | 898                                              |       | 271 | 933  | 792  |   |  |
|    | GO:                                              |       | 169 | 0.63 | 0.75 |   |  |
| CC | 0099 integral component of postsynaptic          | 2/294 | /23 | 218  | 121  | 2 |  |
|    | 055 membrane                                     |       | 271 | 933  | 792  |   |  |
|    | GO:                                              |       | 433 | 0.64 | 0.75 |   |  |
| CC | 0098 neuron to neuron synapse                    | 5/294 | /23 | 148  | 314  | 5 |  |
|    | 984                                              |       | 271 | 667  | 27   |   |  |
|    | GO:                                              |       | 81/ | 0.64 | 0.75 |   |  |
| CC | 0005 collagen trimer                             | 1/294 | 232 | 357  | 314  | 1 |  |
|    | 581                                              |       | 71  | 757  | 27   |   |  |
|    | GO:                                              |       | 175 | 0.65 | 0.75 |   |  |
| CC | 0005 mitochondrial outer membrane                | 2/294 | /23 | 104  | 314  | 2 |  |
|    | 741                                              |       | 271 | 723  | 27   |   |  |

|    |                                                   |       |     |      |      |   |
|----|---------------------------------------------------|-------|-----|------|------|---|
|    | GO:                                               |       | 83/ | 0.65 | 0.75 |   |
| CC | 0005 mitochondrial intermembrane space            | 1/294 | 232 | 255  | 314  | 1 |
|    | 758                                               |       | 71  | 783  | 27   |   |
|    | GO:                                               |       | 83/ | 0.65 | 0.75 |   |
| CC | 1902 serine/threonine protein kinase complex      | 1/294 | 232 | 255  | 314  | 1 |
|    | 554                                               |       | 71  | 783  | 27   |   |
|    | GO:                                               |       | 439 | 0.65 | 0.75 |   |
| CC | 0099 postsynaptic specialization                  | 5/294 | /23 | 341  | 314  | 5 |
|    | 572                                               |       | 271 | 148  | 27   |   |
|    | GO:                                               |       | 178 | 0.66 | 0.75 |   |
| CC | 0098 intrinsic component of postsynaptic membrane | 2/294 | /23 | 018  | 586  | 2 |
|    | 936                                               |       | 271 | 502  | 191  |   |
|    | GO:                                               |       | 86/ | 0.66 | 0.75 |   |
| CC | 0001 stress fiber                                 | 1/294 | 232 | 560  | 586  | 1 |
|    | 725                                               |       | 71  | 716  | 191  |   |
|    | GO:                                               |       | 86/ | 0.66 | 0.75 |   |
| CC | 0097 contractile actin filament bundle            | 1/294 | 232 | 560  | 586  | 1 |
|    | 517                                               |       | 71  | 716  | 191  |   |
|    | GO:                                               |       | 88/ | 0.67 | 0.75 |   |
| CC | 0016 nuclear matrix                               | 1/294 | 232 | 403  | 610  | 1 |
|    | 363                                               |       | 71  | 419  | 084  |   |
|    | GO:                                               |       | 363 | 0.67 | 0.75 |   |
| CC | 0012 vesicle membrane                             | 4/294 | /23 | 570  | 610  | 4 |
|    | 506                                               |       | 271 | 355  | 084  |   |
|    | GO:                                               |       | 89/ | 0.67 | 0.75 |   |
| CC | 0005 lipid droplet                                | 1/294 | 232 | 816  | 610  | 1 |
|    | 811                                               |       | 71  | 799  | 084  |   |
|    | GO:                                               |       | 189 | 0.69 | 0.75 |   |
| CC | 0019 extrinsic component of plasma membrane       | 2/294 | /23 | 205  | 610  | 2 |
|    | 897                                               |       | 271 | 696  | 084  |   |
|    | GO:                                               |       | 284 | 0.69 | 0.75 |   |
| CC | 0005 early endosome                               | 3/294 | /23 | 864  | 610  | 3 |
|    | 769                                               |       | 271 | 59   | 084  |   |
|    | GO:                                               |       | 192 | 0.70 | 0.75 |   |
| CC | 0030 coated vesicle                               | 2/294 | /23 | 031  | 610  | 2 |
|    | 135                                               |       | 271 | 153  | 084  |   |
|    | GO:                                               |       | 95/ | 0.70 | 0.75 |   |
| CC | 0000 heterochromatin                              | 1/294 | 232 | 189  | 610  | 1 |
|    | 792                                               |       | 71  | 635  | 084  |   |
|    | GO:                                               |       | 95/ | 0.70 | 0.75 |   |
| CC | 0000 synaptonemal complex                         | 1/294 | 232 | 189  | 610  | 1 |
|    | 795                                               |       | 71  | 635  | 084  |   |

|    |                                                                  |       |     |      |      |   |
|----|------------------------------------------------------------------|-------|-----|------|------|---|
|    | GO:                                                              |       | 95/ | 0.70 | 0.75 |   |
| CC | 0032 actin filament bundle                                       | 1/294 | 232 | 189  | 610  | 1 |
|    | 432                                                              |       | 71  | 635  | 084  |   |
|    | GO:                                                              |       | 95/ | 0.70 | 0.75 |   |
| CC | 0042 actomyosin                                                  | 1/294 | 232 | 189  | 610  | 1 |
|    | 641                                                              |       | 71  | 635  | 084  |   |
|    | GO:                                                              |       | 95/ | 0.70 | 0.75 |   |
| CC | 0099 synaptonemal structure                                      | 1/294 | 232 | 189  | 610  | 1 |
|    | 086                                                              |       | 71  | 635  | 084  |   |
|    | GO:                                                              |       | 96/ | 0.70 | 0.75 |   |
| CC | 0031 organelle envelope lumen                                    | 1/294 | 232 | 567  | 663  | 1 |
|    | 970                                                              |       | 71  | 796  | 879  |   |
|    | GO:                                                              |       | 97/ | 0.70 | 0.75 |   |
| CC | 0098 postsynaptic density membrane                               | 1/294 | 232 | 941  | 712  | 1 |
|    | 839                                                              |       | 71  | 175  | 073  |   |
|    | GO:                                                              |       | 198 | 0.71 | 0.76 |   |
| CC | 0042 presynaptic membrane                                        | 2/294 | /23 | 627  | 091  | 2 |
|    | 734                                                              |       | 271 | 11   | 861  |   |
|    | GO:                                                              |       | 105 | 0.73 | 0.77 |   |
| CC | 0098 GABA-ergic synapse                                          | 1/294 | /23 | 763  | 645  | 1 |
|    | 982                                                              |       | 271 | 165  | 437  |   |
|    | GO:                                                              |       | 105 | 0.73 | 0.77 |   |
| CC | 0099 integral component of postsynaptic specialization membrane  | 1/294 | /23 | 763  | 645  | 1 |
|    | 060                                                              |       | 271 | 165  | 437  |   |
|    | GO:                                                              |       | 110 | 0.75 | 0.78 |   |
| CC | 1990 oxidoreductase complex                                      | 1/294 | /23 | 386  | 887  | 1 |
|    | 204                                                              |       | 271 | 437  | 495  |   |
|    | GO:                                                              |       | 111 | 0.75 | 0.78 |   |
| CC | 0098 intrinsic component of postsynaptic specialization membrane | 1/294 | /23 | 698  | 887  | 1 |
|    | 948                                                              |       | 271 | 876  | 495  |   |
|    | GO:                                                              |       | 113 | 0.76 | 0.78 |   |
| CC | 0034 nuclear periphery                                           | 1/294 | /23 | 311  | 887  | 1 |
|    | 399                                                              |       | 271 | 944  | 495  |   |
|    | GO:                                                              |       | 113 | 0.76 | 0.78 |   |
| CC | 0098 Schaffer collateral - CA1 synapse                           | 1/294 | /23 | 311  | 887  | 1 |
|    | 685                                                              |       | 271 | 944  | 495  |   |
|    | GO:                                                              |       | 115 | 0.76 | 0.79 |   |
| CC | 0022 cytosolic ribosome                                          | 1/294 | /23 | 909  | 150  | 1 |
|    | 626                                                              |       | 271 | 598  | 385  |   |
|    | GO:                                                              |       | 222 | 0.77 | 0.79 |   |
| CC | 0031 motile cilium                                               | 2/294 | /23 | 312  | 211  | 2 |
|    | 514                                                              |       | 271 | 462  | 364  |   |

|    |                                                |       |     |      |      |   |
|----|------------------------------------------------|-------|-----|------|------|---|
|    | GO:                                            |       | 119 | 0.78 | 0.79 |   |
| CC | 0005 centriole                                 | 1/294 | /23 | 060  | 371  | 1 |
|    | 814                                            |       | 271 | 195  | 469  |   |
|    | GO:                                            |       | 226 | 0.78 | 0.79 |   |
| CC | 0099 integral component of synaptic membrane   | 2/294 | /23 | 157  | 371  | 2 |
|    | 699                                            |       | 271 | 339  | 469  |   |
|    | GO:                                            |       | 130 | 0.80 | 0.81 |   |
| CC | 0005 lysosomal membrane                        | 1/294 | /23 | 938  | 477  | 1 |
|    | 765                                            |       | 271 | 093  | 556  |   |
|    | GO:                                            |       | 130 | 0.80 | 0.81 |   |
| CC | 0098 lytic vacuole membrane                    | 1/294 | /23 | 938  | 477  | 1 |
|    | 852                                            |       | 271 | 093  | 556  |   |
|    | GO:                                            |       | 244 | 0.81 | 0.81 |   |
| CC | 0099 intrinsic component of synaptic membrane  | 2/294 | /23 | 626  | 813  | 2 |
|    | 240                                            |       | 271 | 642  | 431  |   |
|    | GO:                                            |       | 135 | 0.82 | 0.81 |   |
| CC | 0072 mitotic spindle                           | 1/294 | /23 | 118  | 822  | 1 |
|    | 686                                            |       | 271 | 694  | 852  |   |
|    | GO:                                            |       | 136 | 0.82 | 0.81 |   |
| CC | 0099 postsynaptic specialization membrane      | 1/294 | /23 | 345  | 822  | 1 |
|    | 634                                            |       | 271 | 92   | 852  |   |
|    | GO:                                            |       | 138 | 0.82 | 0.81 |   |
| CC | 0005 adherens junction                         | 1/294 | /23 | 791  | 912  | 1 |
|    | 912                                            |       | 271 | 775  | 802  |   |
|    | GO:                                            |       | 368 | 0.84 | 0.83 |   |
| CC | 0031 integral component of organelle membrane  | 3/294 | /23 | 642  | 386  | 3 |
|    | 301                                            |       | 271 | 759  | 254  |   |
|    | GO:                                            |       | 153 | 0.85 | 0.84 |   |
| CC | 0055 recycling endosome                        | 1/294 | /23 | 796  | 163  | 1 |
|    | 037                                            |       | 271 | 755  | 446  |   |
|    | GO:                                            |       | 159 | 0.86 | 0.84 |   |
| CC | 0000 condensed nuclear chromosome              | 1/294 | /23 | 846  | 637  | 1 |
|    | 794                                            |       | 271 | 754  | 272  |   |
|    | GO:                                            |       | 160 | 0.87 | 0.84 |   |
| CC | 0097 non-motile cilium                         | 1/294 | /23 | 014  | 637  | 1 |
|    | 730                                            |       | 271 | 072  | 272  |   |
|    | GO:                                            |       | 166 | 0.87 | 0.84 |   |
| CC | 0036 ciliary basal body                        | 1/294 | /23 | 974  | 864  | 1 |
|    | 064                                            |       | 271 | 36   | 581  |   |
|    | GO:                                            |       | 403 | 0.88 | 0.84 |   |
| CC | 0031 intrinsic component of organelle membrane | 3/294 | /23 | 652  | 864  | 3 |
|    | 300                                            |       | 271 | 733  | 581  |   |

|    |                                              |       |     |      |      |   |
|----|----------------------------------------------|-------|-----|------|------|---|
|    | GO:                                          |       | 171 | 0.88 | 0.84 |   |
| CC | 0030 lamellipodium                           | 1/294 | /23 | 720  | 864  | 1 |
|    | 027                                          |       | 271 | 301  | 581  |   |
|    | GO:                                          |       | 171 | 0.88 | 0.84 |   |
| CC | 0032 plasma membrane bounded cell projection | 1/294 | /23 | 720  | 864  | 1 |
|    | 838 cytoplasm                                |       | 271 | 301  | 581  |   |
|    | GO:                                          |       | 297 | 0.89 | 0.84 |   |
| CC | 0005 spindle                                 | 2/294 | /23 | 156  | 928  | 2 |
|    | 819                                          |       | 271 | 035  | 976  |   |
|    | GO:                                          |       | 183 | 0.90 | 0.85 |   |
| CC | 0005 vacuolar membrane                       | 1/294 | /23 | 327  | 691  | 1 |
|    | 774                                          |       | 271 | 757  | 049  |   |
|    | GO:                                          |       | 198 | 0.92 | 0.86 |   |
| CC | 0044 ribosomal subunit                       | 1/294 | /23 | 019  | 773  | 1 |
|    | 391                                          |       | 271 | 774  | 731  |   |
|    | GO:                                          |       | 200 | 0.92 | 0.86 |   |
| CC | 0098 cluster of actin-based cell projections | 1/294 | /23 | 221  | 773  | 1 |
|    | 862                                          |       | 271 | 854  | 731  |   |
|    | GO:                                          |       | 210 | 0.93 | 0.87 |   |
| CC | 0000 condensed chromosome                    | 1/294 | /23 | 158  | 225  | 1 |
|    | 793                                          |       | 271 | 266  | 621  |   |
|    | GO:                                          |       | 223 | 0.94 | 0.87 |   |
| CC | 0099 cytoplasmic region                      | 1/294 | /23 | 209  | 225  | 1 |
|    | 568                                          |       | 271 | 622  | 621  |   |
|    | GO:                                          |       | 227 | 0.94 | 0.87 |   |
| CC | 0010 endosome membrane                       | 1/294 | /23 | 499  | 225  | 1 |
|    | 008                                          |       | 271 | 483  | 621  |   |
|    | GO:                                          |       | 231 | 0.94 | 0.87 |   |
| CC | 0005 trans-Golgi network                     | 1/294 | /23 | 774  | 225  | 1 |
|    | 802                                          |       | 271 | 881  | 621  |   |
|    | GO:                                          |       | 489 | 0.94 | 0.87 |   |
| CC | 0019 organelle inner membrane                | 3/294 | /23 | 827  | 225  | 3 |
|    | 866                                          |       | 271 | 747  | 621  |   |
|    | GO:                                          |       | 234 | 0.94 | 0.87 |   |
| CC | 0005 ribosome                                | 1/294 | /23 | 972  | 225  | 1 |
|    | 840                                          |       | 271 | 372  | 621  |   |
|    | GO:                                          |       | 273 | 0.96 | 0.88 |   |
| CC | 0005 mitochondrial matrix                    | 1/294 | /23 | 954  | 347  | 1 |
|    | 759                                          |       | 271 | 675  | 54   |   |
|    | GO:                                          |       | 430 | 0.97 | 0.88 |   |
| CC | 0005 microtubule                             | 2/294 | /23 | 349  | 347  | 2 |
|    | 874                                          |       | 271 | 409  | 54   |   |

|    |                                                  |         |     |      |      |   |
|----|--------------------------------------------------|---------|-----|------|------|---|
|    | GO:                                              |         | 295 | 0.97 | 0.88 |   |
| CC | 0098 Golgi apparatus subcompartment              | 1/294   | /23 | 705  | 347  | 1 |
|    | 791                                              |         | 271 | 712  | 54   |   |
|    | GO:                                              |         | 444 | 0.97 | 0.88 |   |
| CC | 0005 mitochondrial inner membrane                | 2/294   | /23 | 726  | 347  | 2 |
|    | 743                                              |         | 271 | 902  | 54   |   |
|    | GO:                                              |         | 321 | 0.98 | 0.88 |   |
| CC | 0031 organelle subcompartment                    | 1/294   | /23 | 358  | 571  | 1 |
|    | 984                                              |         | 271 | 85   | 497  |   |
|    | GO:                                              |         | 499 | 8.78 | 2.64 | 1 |
| MF | 0048 receptor ligand activity                    | 111/292 | /22 | E-   | E-   | 1 |
|    | 018                                              |         | 669 | 109  | 106  | 1 |
|    | GO:                                              |         | 231 | 2.00 | 3.00 | 5 |
| MF | 0005 cytokine activity                           | 56/292  | /22 | E-   | E-   | 6 |
|    | 125                                              |         | 669 | 55   | 53   | 6 |
|    | GO:                                              |         | 314 | 8.92 | 8.95 | 6 |
| MF | 0005 cytokine receptor binding                   | 60/292  | /22 | E-   | E-   | 0 |
|    | 126                                              |         | 669 | 53   | 51   | 0 |
|    | GO:                                              |         | 123 | 1.57 | 1.18 | 3 |
| MF | 0140 immune receptor activity                    | 37/292  | /22 | E-   | E-   | 7 |
|    | 375                                              |         | 669 | 40   | 38   | 7 |
|    | GO:                                              |         | 147 | 2.75 | 1.65 | 3 |
| MF | 0008 growth factor activity                      | 39/292  | /22 | E-   | E-   | 9 |
|    | 083                                              |         | 669 | 40   | 38   | 9 |
|    | GO:                                              |         | 136 | 3.42 | 1.72 | 3 |
| MF | 0019 cytokine binding                            | 36/292  | /22 | E-   | E-   | 6 |
|    | 955                                              |         | 669 | 37   | 35   | 6 |
|    | GO:                                              |         | 98/ | 1.82 | 7.81 | 3 |
| MF | 0004 cytokine receptor activity                  | 32/292  | 226 | E-   | E-   | 2 |
|    | 896                                              |         | 69  | 36   | 35   | 2 |
|    | GO:                                              |         | 310 | 4.18 | 1.57 | 3 |
| MF | 0001 G protein-coupled receptor binding          | 39/292  | /22 | E-   | E-   | 9 |
|    | 664                                              |         | 669 | 27   | 25   | 9 |
|    | GO:                                              |         | 144 | 4.61 | 1.54 | 2 |
| MF | 0008 G protein-coupled peptide receptor activity | 28/292  | /22 | E-   | E-   | 8 |
|    | 528                                              |         | 669 | 25   | 23   | 8 |
|    | GO:                                              |         | 151 | 1.85 | 5.56 | 2 |
| MF | 0001 peptide receptor activity                   | 28/292  | /22 | E-   | E-   | 8 |
|    | 653                                              |         | 669 | 24   | 23   | 8 |
|    | GO:                                              |         | 149 | 2.42 | 6.62 | 2 |
| MF | 0070 growth factor receptor binding              | 27/292  | /22 | E-   | E-   | 7 |
|    | 851                                              |         | 669 | 23   | 22   | 7 |

|    |                                                          |        |     |      |      |  |   |
|----|----------------------------------------------------------|--------|-----|------|------|--|---|
|    | GO:                                                      |        | 130 | 8.40 | 2.11 |  | 2 |
| MF | 0005 hormone activity                                    | 23/292 | /22 | E-   | E-   |  | 3 |
|    | 179                                                      |        | 669 | 20   | 18   |  |   |
|    | GO:                                                      |        | 44/ | 1.15 | 2.66 |  | 1 |
| MF | 0008 chemokine activity                                  | 16/292 | 226 | E-   | E-   |  | 6 |
|    | 009                                                      |        | 69  | 19   | 18   |  |   |
|    | GO:                                                      |        | 78/ | 5.98 | 1.29 |  | 1 |
| MF | 0042 chemokine receptor binding                          | 18/292 | 226 | E-   | E-   |  | 8 |
|    | 379                                                      |        | 69  | 18   | 16   |  |   |
|    | GO:                                                      |        | 24/ | 3.92 | 7.87 |  | 1 |
| MF | 0016 C-C chemokine receptor activity                     | 12/292 | 226 | E-   | E-   |  | 2 |
|    | 493                                                      |        | 69  | 17   | 16   |  |   |
|    | GO:                                                      |        | 25/ | 7.46 | 1.25 |  | 1 |
| MF | 0001 G protein-coupled chemoattractant receptor activity | 12/292 | 226 | E-   | E-   |  | 2 |
|    | 637                                                      |        | 69  | 17   | 15   |  |   |
|    | GO:                                                      |        | 25/ | 7.46 | 1.25 |  | 1 |
| MF | 0004 chemokine receptor activity                         | 12/292 | 226 | E-   | E-   |  | 2 |
|    | 950                                                      |        | 69  | 17   | 15   |  |   |
|    | GO:                                                      |        | 25/ | 7.46 | 1.25 |  | 1 |
| MF | 0019 C-C chemokine binding                               | 12/292 | 226 | E-   | E-   |  | 2 |
|    | 957                                                      |        | 69  | 17   | 15   |  |   |
|    | GO:                                                      |        | 33/ | 9.37 | 1.48 |  | 1 |
| MF | 0019 chemokine binding                                   | 13/292 | 226 | E-   | E-   |  | 3 |
|    | 956                                                      |        | 69  | 17   | 15   |  |   |
|    | GO:                                                      |        | 53/ | 3.89 | 5.57 |  | 1 |
| MF | 0004 nuclear receptor activity                           | 14/292 | 226 | E-   | E-   |  | 4 |
|    | 879                                                      |        | 69  | 15   | 14   |  |   |
|    | GO:                                                      |        | 53/ | 3.89 | 5.57 |  | 1 |
| MF | 0098 ligand-activated transcription factor activity      | 14/292 | 226 | E-   | E-   |  | 4 |
|    | 531                                                      |        | 69  | 15   | 14   |  |   |
|    | GO:                                                      |        | 147 | 4.47 | 6.12 |  | 2 |
| MF | 0019 growth factor binding                               | 20/292 | /22 | E-   | E-   |  | 0 |
|    | 838                                                      |        | 669 | 15   | 14   |  |   |
|    | GO:                                                      |        | 54/ | 5.19 | 6.79 |  | 1 |
| MF | 0003 steroid hormone receptor activity                   | 14/292 | 226 | E-   | E-   |  | 4 |
|    | 707                                                      |        | 69  | 15   | 14   |  |   |
|    | GO:                                                      |        | 29/ | 3.78 | 4.74 |  | 1 |
| MF | 0045 chemorepellent activity                             | 11/292 | 226 | E-   | E-   |  | 1 |
|    | 499                                                      |        | 69  | 14   | 13   |  |   |
|    | GO:                                                      |        | 48/ | 7.67 | 9.24 |  | 1 |
| MF | 0032 tumor necrosis factor receptor superfamily binding  | 12/292 | 226 | E-   | E-   |  | 2 |
|    | 813                                                      |        | 69  | 13   | 12   |  |   |

|    |                                               |        |     |      |      |   |
|----|-----------------------------------------------|--------|-----|------|------|---|
|    | GO:                                           |        | 22/ | 3.71 | 4.29 |   |
| MF | 0030 semaphorin receptor binding              | 9/292  | 226 | E-   | E-   | 9 |
|    | 215                                           |        | 69  | 12   | 11   |   |
|    | GO:                                           |        | 15/ | 4.10 | 4.57 |   |
| MF | 0045 CXCR chemokine receptor binding          | 8/292  | 226 | E-   | E-   | 8 |
|    | 236                                           |        | 69  | 12   | 11   |   |
|    | GO:                                           |        | 88/ | 1.04 | 1.12 | 1 |
| MF | 0042 hormone binding                          | 13/292 | 226 | E-   | E-   | 3 |
|    | 562                                           |        | 69  | 10   | 09   |   |
|    | GO:                                           |        | 318 | 1.87 | 1.94 | 2 |
| MF | 0042 peptide binding                          | 22/292 | /22 | E-   | E-   | 2 |
|    | 277                                           |        | 669 | 10   | 09   |   |
|    | GO:                                           |        | 156 | 2.01 | 2.01 | 1 |
| MF | 0008 heparin binding                          | 16/292 | /22 | E-   | E-   | 6 |
|    | 201                                           |        | 669 | 10   | 09   |   |
|    | GO:                                           |        | 33/ | 2.54 | 2.47 |   |
| MF | 0005 tumor necrosis factor receptor binding   | 9/292  | 226 | E-   | E-   | 9 |
|    | 164                                           |        | 69  | 10   | 09   |   |
|    | GO:                                           |        | 213 | 3.60 | 3.39 | 1 |
| MF | 0005 glycosaminoglycan binding                | 18/292 | /22 | E-   | E-   | 8 |
|    | 539                                           |        | 669 | 10   | 09   |   |
|    | GO:                                           |        | 38/ | 1.01 | 9.25 |   |
| MF | 0042 chemoattractant activity                 | 9/292  | 226 | E-   | E-   | 9 |
|    | 056                                           |        | 69  | 09   | 09   |   |
|    | GO:                                           |        | 391 | 1.71 | 1.51 | 2 |
| MF | 0033 amide binding                            | 23/292 | /22 | E-   | E-   | 3 |
|    | 218                                           |        | 669 | 09   | 08   |   |
|    | GO:                                           |        | 56/ | 2.28 | 1.96 | 1 |
| MF | 0048 CCR chemokine receptor binding           | 10/292 | 226 | E-   | E-   | 0 |
|    | 020                                           |        | 69  | 09   | 08   |   |
|    | GO:                                           |        | 260 | 8.69 | 7.27 | 1 |
| MF | 1901 sulfur compound binding                  | 18/292 | /22 | E-   | E-   | 8 |
|    | 681                                           |        | 669 | 09   | 08   |   |
|    | GO:                                           |        | 34/ | 9.35 | 7.61 |   |
| MF | 0071 neuropeptide receptor binding            | 8/292  | 226 | E-   | E-   | 8 |
|    | 855                                           |        | 69  | 09   | 08   |   |
|    | GO:                                           |        | 53/ | 2.33 | 1.84 |   |
| MF | 0017 peptide hormone binding                  | 9/292  | 226 | E-   | E-   | 9 |
|    | 046                                           |        | 69  | 08   | 07   |   |
|    | GO:                                           |        | 36/ | 3.32 | 2.56 |   |
| MF | 0005 epidermal growth factor receptor binding | 7/292  | 226 | E-   | E-   | 7 |
|    | 154                                           |        | 69  | 07   | 06   |   |



|    |                                                                          |        |     |      |      |  |   |
|----|--------------------------------------------------------------------------|--------|-----|------|------|--|---|
|    | GO:                                                                      |        | 181 | 6.91 | 5.20 |  | 1 |
| MF | 0051 hormone receptor binding                                            | 13/292 | /22 | E-   | E-   |  | 3 |
|    | 427                                                                      |        | 669 | 07   | 06   |  |   |
|    | GO:                                                                      |        | 28/ | 1.29 | 9.23 |  |   |
| MF | 0001 transcription coactivator binding                                   | 6/292  | 226 | E-   | E-   |  | 6 |
|    | 223                                                                      |        | 69  | 06   | 06   |  |   |
|    | GO:                                                                      |        | 28/ | 1.29 | 9.23 |  |   |
| MF | 0005 neuropeptide hormone activity                                       | 6/292  | 226 | E-   | E-   |  | 6 |
|    | 184                                                                      |        | 69  | 06   | 06   |  |   |
|    | GO:                                                                      |        | 136 | 1.57 | 1.10 |  | 1 |
| MF | 0005 integrin binding                                                    | 11/292 | /22 | E-   | E-   |  | 1 |
|    | 178                                                                      |        | 669 | 06   | 05   |  |   |
|    | GO:                                                                      |        | 77/ | 6.71 | 4.59 |  |   |
| MF | 0019 transmembrane receptor protein kinase activity                      | 8/292  | 226 | E-   | E-   |  | 8 |
|    | 199                                                                      |        | 69  | 06   | 05   |  |   |
|    | GO:                                                                      |        | 59/ | 1.05 | 7.05 |  |   |
| MF | 0001 transcription cofactor binding                                      | 7/292  | 226 | E-   | E-   |  | 7 |
|    | 221                                                                      |        | 69  | 05   | 05   |  |   |
|    | GO:                                                                      |        | 25/ | 1.47 | 9.65 |  |   |
| MF | 0005 transforming growth factor beta receptor binding                    | 5/292  | 226 | E-   | E-   |  | 5 |
|    | 160                                                                      |        | 69  | 05   | 05   |  |   |
|    | GO:                                                                      |        | 15/ | 3.29 | 0.00 |  |   |
| MF | 0005 neurotrophin receptor binding                                       | 4/292  | 226 | E-   | 021  |  | 4 |
|    | 165                                                                      |        | 69  | 05   | 082  |  |   |
|    | GO:                                                                      |        | 73/ | 4.31 | 0.00 |  |   |
| MF | 0030 receptor tyrosine kinase binding                                    | 7/292  | 226 | E-   | 027  |  | 7 |
|    | 971                                                                      |        | 69  | 05   | 061  |  |   |
|    | GO:                                                                      |        | 105 | 6.52 | 0.00 |  |   |
| MF | 1990 protein tyrosine kinase binding                                     | 8/292  | /22 | E-   | 040  |  | 8 |
|    | 782                                                                      |        | 669 | 05   | 04   |  |   |
|    | GO:                                                                      |        | 324 | 8.73 | 0.00 |  | 1 |
| MF | 0044 ubiquitin-like protein ligase binding                               | 14/292 | /22 | E-   | 051  |  | 4 |
|    | 389                                                                      |        | 669 | 05   | 696  |  |   |
|    | GO:                                                                      |        | 284 | 8.76 | 0.00 |  | 1 |
| MF | 0061 RNA polymerase II-specific DNA-binding transcription factor binding | 13/292 | /22 | E-   | 051  |  | 3 |
|    | 629                                                                      |        | 669 | 05   | 696  |  |   |
|    | GO:                                                                      |        | 58/ | 0.00 | 0.00 |  |   |
| MF | 0001 amyloid-beta binding                                                | 6/292  | 226 | 010  | 057  |  | 6 |
|    | 540                                                                      |        | 69  | 008  | 943  |  |   |
|    | GO:                                                                      |        | 20/ | 0.00 | 0.00 |  |   |
| MF | 0005 death receptor binding                                              | 4/292  | 226 | 011  | 061  |  | 4 |
|    | 123                                                                      |        | 69  | 104  | 903  |  |   |

|    |                                                                 |        |     |      |      |   |
|----|-----------------------------------------------------------------|--------|-----|------|------|---|
|    | GO:                                                             |        | 20/ | 0.00 | 0.00 |   |
| MF | 0051 peptide hormone receptor binding                           | 4/292  | 226 | 011  | 061  | 4 |
|    | 428                                                             |        | 69  | 104  | 903  |   |
|    | GO:                                                             |        | 64/ | 0.00 | 0.00 |   |
| MF | 0005 structural constituent of cytoskeleton                     | 6/292  | 226 | 017  | 095  | 6 |
|    | 200                                                             |        | 69  | 381  | 135  |   |
|    | GO:                                                             |        | 306 | 0.00 | 0.00 |   |
| MF | 0031 ubiquitin protein ligase binding                           | 13/292 | /22 | 018  | 098  | 1 |
|    | 625                                                             |        | 669 | 348  | 64   | 3 |
|    | GO:                                                             |        | 23/ | 0.00 | 0.00 |   |
| MF | 0051 misfolded protein binding                                  | 4/292  | 226 | 019  | 103  | 4 |
|    | 787                                                             |        | 69  | 685  | 969  |   |
|    | GO:                                                             |        | 10/ | 0.00 | 0.00 |   |
| MF | 0034 type I transforming growth factor beta<br>receptor binding | 3/292  | 226 | 023  | 123  | 3 |
|    | 713                                                             |        | 69  | 739  | 217  |   |
|    | GO:                                                             |        | 130 | 0.00 | 0.00 |   |
| MF | 0004 protein tyrosine kinase activity                           | 8/292  | /22 | 028  | 146  | 8 |
|    | 713                                                             |        | 669 | 794  | 922  |   |
|    | GO:                                                             |        | 26/ | 0.00 | 0.00 |   |
| MF | 0044 protein folding chaperone                                  | 4/292  | 226 | 032  | 161  | 4 |
|    | 183                                                             |        | 69  | 239  | 762  |   |
|    | GO:                                                             |        | 284 | 0.00 | 0.00 |   |
| MF | 0050 cell adhesion molecule binding                             | 12/292 | /22 | 033  | 167  | 1 |
|    | 839                                                             |        | 669 | 905  | 332  | 2 |
|    | GO:                                                             |        | 76/ | 0.00 | 0.00 |   |
| MF | 0038 cargo receptor activity                                    | 6/292  | 226 | 044  | 216  | 6 |
|    | 024                                                             |        | 69  | 556  | 348  |   |
|    | GO:                                                             |        | 29/ | 0.00 | 0.00 |   |
| MF | 0005 insulin-like growth factor binding                         | 4/292  | 226 | 049  | 237  | 4 |
|    | 520                                                             |        | 69  | 686  | 432  |   |
|    | GO:                                                             |        | 13/ | 0.00 | 0.00 |   |
| MF | 0004 complement receptor activity                               | 3/292  | 226 | 054  | 258  | 3 |
|    | 875                                                             |        | 69  | 978  | 611  |   |
|    | GO:                                                             |        | 14/ | 0.00 | 0.00 |   |
| MF | 0044 S100 protein binding                                       | 3/292  | 226 | 069  | 317  | 3 |
|    | 548                                                             |        | 69  | 306  | 67   |   |
|    | GO:                                                             |        | 114 | 0.00 | 0.00 |   |
| MF | 0016 nuclear receptor binding                                   | 7/292  | /22 | 069  | 317  | 7 |
|    | 922                                                             |        | 669 | 643  | 67   |   |
|    | GO:                                                             |        | 32/ | 0.00 | 0.00 |   |
| MF | 0033 receptor serine/threonine kinase binding                   | 4/292  | 226 | 072  | 327  | 4 |
|    | 612                                                             |        | 69  | 98   | 923  |   |

|    |                                                                      |        |     |      |      |   |
|----|----------------------------------------------------------------------|--------|-----|------|------|---|
|    | GO:                                                                  |        | 85/ | 0.00 | 0.00 |   |
| MF | 0003 double-stranded RNA binding                                     | 6/292  | 226 | 080  | 355  | 6 |
|    | 725                                                                  |        | 69  | 946  | 657  |   |
|    | GO:                                                                  |        | 152 | 0.00 | 0.00 |   |
| MF | 0035 nuclear hormone receptor binding                                | 8/292  | /22 | 081  | 355  | 8 |
|    | 257                                                                  |        | 669 | 515  | 657  |   |
|    | GO:                                                                  |        | 119 | 0.00 | 0.00 |   |
| MF | 0005 steroid binding                                                 | 7/292  | /22 | 089  | 386  | 7 |
|    | 496                                                                  |        | 669 | 796  | 189  |   |
|    | GO:                                                                  |        | 365 | 0.00 | 0.00 |   |
| MF | 0140 DNA-binding transcription factor binding                        | 13/292 | /22 | 096  | 406  | 1 |
|    | 297                                                                  |        | 669 | 858  | 335  | 3 |
|    | GO:                                                                  |        | 59/ | 0.00 | 0.00 |   |
| MF | 0004 transmembrane receptor protein tyrosine kinase activity         | 5/292  | 226 | 097  | 406  | 5 |
|    | 714                                                                  |        | 69  | 18   | 335  |   |
|    | GO:                                                                  |        | 16/ | 0.00 | 0.00 |   |
| MF | 0004 icosanoid receptor activity                                     | 3/292  | 226 | 104  | 425  | 3 |
|    | 953                                                                  |        | 69  | 61   | 583  |   |
|    | GO:                                                                  |        | 16/ | 0.00 | 0.00 |   |
| MF | 0030 protein tyrosine kinase activator activity                      | 3/292  | 226 | 104  | 425  | 3 |
|    | 296                                                                  |        | 69  | 61   | 583  |   |
|    | GO:                                                                  |        | 18/ | 0.00 | 0.00 |   |
| MF | 0004 transmembrane receptor protein serine/threonine kinase activity | 3/292  | 226 | 149  | 577  | 3 |
|    | 675                                                                  |        | 69  | 554  | 228  |   |
|    | GO:                                                                  |        | 18/ | 0.00 | 0.00 |   |
| MF | 0016 protein-hormone receptor activity                               | 3/292  | 226 | 149  | 577  | 3 |
|    | 500                                                                  |        | 69  | 554  | 228  |   |
|    | GO:                                                                  |        | 18/ | 0.00 | 0.00 |   |
| MF | 0050 NAD(P)+ nucleosidase activity                                   | 3/292  | 226 | 149  | 577  | 3 |
|    | 135                                                                  |        | 69  | 554  | 228  |   |
|    | GO:                                                                  |        | 18/ | 0.00 | 0.00 |   |
| MF | 0061 NAD+ nucleotidase, cyclic ADP-ribose generating                 | 3/292  | 226 | 149  | 577  | 3 |
|    | 809                                                                  |        | 69  | 554  | 228  |   |
|    | GO:                                                                  |        | 40/ | 0.00 | 0.00 |   |
| MF | 0008 neuropeptide receptor activity                                  | 4/292  | 226 | 171  | 652  | 4 |
|    | 188                                                                  |        | 69  | 097  | 014  |   |
|    | GO:                                                                  |        | 20/ | 0.00 | 0.00 |   |
| MF | 0003 NAD+ nucleosidase activity                                      | 3/292  | 226 | 204  | 761  | 3 |
|    | 953                                                                  |        | 69  | 997  | 914  |   |
|    | GO:                                                                  |        | 20/ | 0.00 | 0.00 |   |
| MF | 0035 glucocorticoid receptor binding                                 | 3/292  | 226 | 204  | 761  | 3 |
|    | 259                                                                  |        | 69  | 997  | 914  |   |

|    |                                                                     |       |     |      |      |   |  |
|----|---------------------------------------------------------------------|-------|-----|------|------|---|--|
|    | GO:                                                                 |       | 45/ | 0.00 | 0.00 |   |  |
| MF | 0001 phosphotyrosine residue binding                                | 4/292 | 226 | 265  | 973  | 4 |  |
|    | 784                                                                 |       | 69  | 262  | 877  |   |  |
|    | GO:                                                                 |       | 46/ | 0.00 | 0.01 |   |  |
| MF | 0005 scavenger receptor activity                                    | 4/292 | 226 | 287  | 043  | 4 |  |
|    | 044                                                                 |       | 69  | 622  | 245  |   |  |
|    | GO:                                                                 |       | 24/ | 0.00 | 0.01 |   |  |
| MF | 0000 RNA polymerase II core promoter sequence-specific DNA binding  | 3/292 | 226 | 350  | 241  | 3 |  |
|    | 979                                                                 |       | 69  | 393  | 019  |   |  |
|    | GO:                                                                 |       | 24/ | 0.00 | 0.01 |   |  |
| MF | 0070 transmembrane receptor protein serine/threonine kinase binding | 3/292 | 226 | 350  | 241  | 3 |  |
|    | 696                                                                 |       | 69  | 393  | 019  |   |  |
|    | GO:                                                                 |       | 50/ | 0.00 | 0.01 |   |  |
| MF | 0001 core promoter sequence-specific DNA binding                    | 4/292 | 226 | 389  | 365  | 4 |  |
|    | 046                                                                 |       | 69  | 948  | 057  |   |  |
|    | GO:                                                                 |       | 83/ | 0.00 | 0.01 |   |  |
| MF | 0030 protein kinase activator activity                              | 5/292 | 226 | 439  | 493  | 5 |  |
|    | 295                                                                 |       | 69  | 042  | 951  |   |  |
|    | GO:                                                                 |       | 26/ | 0.00 | 0.01 |   |  |
| MF | 0005 fibroblast growth factor receptor binding                      | 3/292 | 226 | 441  | 493  | 3 |  |
|    | 104                                                                 |       | 69  | 656  | 951  |   |  |
|    | GO:                                                                 |       | 26/ | 0.00 | 0.01 |   |  |
| MF | 0017 fibroblast growth factor binding                               | 3/292 | 226 | 441  | 493  | 3 |  |
|    | 134                                                                 |       | 69  | 656  | 951  |   |  |
|    | GO:                                                                 |       | 27/ | 0.00 | 0.01 |   |  |
| MF | 0015 coreceptor activity                                            | 3/292 | 226 | 492  | 628  | 3 |  |
|    | 026                                                                 |       | 69  | 18   | 264  |   |  |
|    | GO:                                                                 |       | 27/ | 0.00 | 0.01 |   |  |
| MF | 0042 neuropeptide binding                                           | 3/292 | 226 | 492  | 628  | 3 |  |
|    | 923                                                                 |       | 69  | 18   | 264  |   |  |
|    | GO:                                                                 |       | 28/ | 0.00 | 0.01 |   |  |
| MF | 0030 polysaccharide binding                                         | 3/292 | 226 | 546  | 786  | 3 |  |
|    | 247                                                                 |       | 69  | 049  | 843  |   |  |
|    | GO:                                                                 |       | 90/ | 0.00 | 0.01 |   |  |
| MF | 0019 kinase activator activity                                      | 5/292 | 226 | 618  | 997  | 5 |  |
|    | 209                                                                 |       | 69  | 119  | 15   |   |  |
|    | GO:                                                                 |       | 57/ | 0.00 | 0.01 |   |  |
| MF | 0045 protein phosphorylated amino acid binding                      | 4/292 | 226 | 623  | 997  | 4 |  |
|    | 309                                                                 |       | 69  | 586  | 15   |   |  |
|    | GO:                                                                 |       | 11/ | 0.00 | 0.02 |   |  |
| MF | 0004 prostaglandin receptor activity                                | 2/292 | 226 | 842  | 641  | 2 |  |
|    | 955                                                                 |       | 69  | 273  | 338  |   |  |

|    |      |                                                                |       |      |      |       |
|----|------|----------------------------------------------------------------|-------|------|------|-------|
|    | GO:  |                                                                | 11/   | 0.00 | 0.02 |       |
| MF | 0005 | transforming growth factor beta-activated<br>receptor activity | 2/292 | 226  | 842  | 641 2 |
|    | 024  |                                                                |       | 69   | 273  | 338   |
|    | GO:  |                                                                | 33/   | 0.00 | 0.02 |       |
| MF | 0051 | NF-kappaB binding                                              | 3/292 | 226  | 867  | 692 3 |
|    | 059  |                                                                |       | 69   | 466  | 297   |
|    | GO:  |                                                                | 12/   | 0.01 | 0.02 |       |
| MF | 0001 | RNA polymerase II transcription cofactor<br>binding            | 2/292 | 226  | 002  | 987 2 |
|    | 224  |                                                                |       | 69   | 188  | 241   |
|    | GO:  |                                                                | 12/   | 0.01 | 0.02 |       |
| MF | 0004 | prostanoid receptor activity                                   | 2/292 | 226  | 002  | 987 2 |
|    | 954  |                                                                |       | 69   | 188  | 241   |
|    | GO:  |                                                                | 12/   | 0.01 | 0.02 |       |
| MF | 0017 | semaphorin receptor activity                                   | 2/292 | 226  | 002  | 987 2 |
|    | 154  |                                                                |       | 69   | 188  | 241   |
|    | GO:  |                                                                | 12/   | 0.01 | 0.02 |       |
| MF | 0023 | MHC protein complex binding                                    | 2/292 | 226  | 002  | 987 2 |
|    | 023  |                                                                |       | 69   | 188  | 241   |
|    | GO:  |                                                                | 146   | 0.01 | 0.03 |       |
| MF | 0031 | heat shock protein binding                                     | 6/292 | /22  | 174  | 378 6 |
|    | 072  |                                                                |       | 669  | 273  | 912   |
|    | GO:  |                                                                | 13/   | 0.01 | 0.03 |       |
| MF | 0036 | phosphatidylinositol 3-kinase regulatory<br>subunit binding    | 2/292 | 226  | 174  | 378 2 |
|    | 312  |                                                                |       | 69   | 408  | 912   |
|    | GO:  |                                                                | 13/   | 0.01 | 0.03 |       |
| MF | 0043 | neurotrophin binding                                           | 2/292 | 226  | 174  | 378 2 |
|    | 121  |                                                                |       | 69   | 408  | 912   |
|    | GO:  |                                                                | 37/   | 0.01 | 0.03 |       |
| MF | 0016 | hydrolase activity, hydrolyzing N-glycosyl<br>compounds        | 3/292 | 226  | 189  | 378 3 |
|    | 799  |                                                                |       | 69   | 708  | 912   |
|    | GO:  |                                                                | 37/   | 0.01 | 0.03 |       |
| MF | 0017 | sodium channel regulator activity                              | 3/292 | 226  | 189  | 378 3 |
|    | 080  |                                                                |       | 69   | 708  | 912   |
|    | GO:  |                                                                | 38/   | 0.01 | 0.03 |       |
| MF | 0051 | protein phosphatase 2A binding                                 | 3/292 | 226  | 279  | 600 3 |
|    | 721  |                                                                |       | 69   | 596  | 242   |
|    | GO:  |                                                                | 14/   | 0.01 | 0.03 |       |
| MF | 0005 | platelet-derived growth factor receptor<br>binding             | 2/292 | 226  | 358  | 718 2 |
|    | 161  |                                                                |       | 69   | 592  | 251   |
|    | GO:  |                                                                | 14/   | 0.01 | 0.03 |       |
| MF | 0048 | activin binding                                                | 2/292 | 226  | 358  | 718 2 |
|    | 185  |                                                                |       | 69   | 592  | 251   |

|    |                                                             |       |     |      |      |   |
|----|-------------------------------------------------------------|-------|-----|------|------|---|
|    | GO:                                                         |       | 14/ | 0.01 | 0.03 |   |
| MF | 0070 BMP receptor binding                                   | 2/292 | 226 | 358  | 718  | 2 |
|    | 700                                                         |       | 69  | 592  | 251  |   |
|    | GO:                                                         |       | 152 | 0.01 | 0.03 |   |
| MF | 0002 protease binding                                       | 6/292 | /22 | 409  | 823  | 6 |
|    | 020                                                         |       | 669 | 638  | 201  |   |
|    | GO:                                                         |       | 15/ | 0.01 | 0.04 |   |
| MF | 0046 1-phosphatidylinositol-3-kinase regulator activity     | 2/292 | 226 | 554  | 178  | 2 |
|    | 935                                                         |       | 69  | 404  | 192  |   |
|    | GO:                                                         |       | 41/ | 0.01 | 0.04 |   |
| MF | 0043 phosphatidylinositol 3-kinase binding                  | 3/292 | 226 | 572  | 188  | 3 |
|    | 548                                                         |       | 69  | 034  | 185  |   |
|    | GO:                                                         |       | 202 | 0.01 | 0.04 |   |
| MF | 0019 kinase regulator activity                              | 7/292 | /22 | 606  | 242  | 7 |
|    | 207                                                         |       | 669 | 511  | 494  |   |
|    | GO:                                                         |       | 159 | 0.01 | 0.04 |   |
| MF | 0020 heme binding                                           | 6/292 | /22 | 723  | 512  | 6 |
|    | 037                                                         |       | 669 | 616  | 165  |   |
|    | GO:                                                         |       | 16/ | 0.01 | 0.04 |   |
| MF | 0005 vascular endothelial growth factor receptor binding    | 2/292 | 226 | 761  | 532  | 2 |
|    | 172                                                         |       | 69  | 518  | 561  |   |
|    | GO:                                                         |       | 16/ | 0.01 | 0.04 |   |
| MF | 0008 adenylate cyclase binding                              | 2/292 | 226 | 761  | 532  | 2 |
|    | 179                                                         |       | 69  | 518  | 561  |   |
|    | GO:                                                         |       | 17/ | 0.01 | 0.05 |   |
| MF | 0005 interleukin-1 receptor binding                         | 2/292 | 226 | 979  | 050  | 2 |
|    | 149                                                         |       | 69  | 611  | 568  |   |
|    | GO:                                                         |       | 45/ | 0.02 | 0.05 |   |
| MF | 0004 non-membrane spanning protein tyrosine kinase activity | 3/292 | 226 | 015  | 099  | 3 |
|    | 715                                                         |       | 69  | 658  | 322  |   |
|    | GO:                                                         |       | 168 | 0.02 | 0.05 |   |
| MF | 0046 tetrapyrrole binding                                   | 6/292 | /22 | 193  | 503  | 6 |
|    | 906                                                         |       | 669 | 88   | 945  |   |
|    | GO:                                                         |       | 84/ | 0.02 | 0.05 |   |
| MF | 0051 unfolded protein binding                               | 4/292 | 226 | 329  | 796  | 4 |
|    | 082                                                         |       | 69  | 738  | 477  |   |
|    | GO:                                                         |       | 19/ | 0.02 | 0.06 |   |
| MF | 0001 transcription corepressor binding                      | 2/292 | 226 | 447  | 039  | 2 |
|    | 222                                                         |       | 69  | 48   | 511  |   |
|    | GO:                                                         |       | 129 | 0.02 | 0.06 |   |
| MF | 0047 protein N-terminus binding                             | 5/292 | /22 | 593  | 347  | 5 |
|    | 485                                                         |       | 669 | 519  | 853  |   |

|    |                                                                                                                                   |       |     |      |      |   |
|----|-----------------------------------------------------------------------------------------------------------------------------------|-------|-----|------|------|---|
|    | GO:                                                                                                                               |       | 20/ | 0.02 | 0.06 |   |
| MF | 0035 phosphatidylinositol 3-kinase regulator activity                                                                             | 2/292 | 226 | 696  | 519  | 2 |
|    | 014                                                                                                                               |       | 69  | 645  | 036  |   |
|    | GO:                                                                                                                               |       | 88/ | 0.02 | 0.06 |   |
| MF | 0035 steroid hormone receptor binding                                                                                             | 4/292 | 226 | 706  | 519  | 4 |
|    | 258                                                                                                                               |       | 69  | 768  | 036  |   |
|    | GO:                                                                                                                               |       | 22/ | 0.03 | 0.07 |   |
| MF | 0046 retinoid X receptor binding                                                                                                  | 2/292 | 226 | 223  | 703  | 2 |
|    | 965                                                                                                                               |       | 69  | 951  | 006  |   |
|    | GO:                                                                                                                               |       | 23/ | 0.03 | 0.08 |   |
| MF | 0004 MAP kinase kinase kinase activity                                                                                            | 2/292 | 226 | 501  | 171  | 2 |
|    | 709                                                                                                                               |       | 69  | 516  | 632  |   |
|    | GO:                                                                                                                               |       | 23/ | 0.03 | 0.08 |   |
| MF | 0038 pattern recognition receptor activity                                                                                        | 2/292 | 226 | 501  | 171  | 2 |
|    | 187                                                                                                                               |       | 69  | 516  | 632  |   |
|    | GO:                                                                                                                               |       | 23/ | 0.03 | 0.08 |   |
| MF | 0050 transforming growth factor beta binding                                                                                      | 2/292 | 226 | 501  | 171  | 2 |
|    | 431                                                                                                                               |       | 69  | 516  | 632  |   |
|    | GO:                                                                                                                               |       | 24/ | 0.03 | 0.08 |   |
| MF | 0001 complement binding                                                                                                           | 2/292 | 226 | 787  | 772  | 2 |
|    | 848                                                                                                                               |       | 69  | 981  | 168  |   |
|    | GO:                                                                                                                               |       | 25/ | 0.04 | 0.09 |   |
| MF | 0005 Notch binding                                                                                                                | 2/292 | 226 | 083  | 383  | 2 |
|    | 112                                                                                                                               |       | 69  | 074  | 36   |   |
|    | GO:                                                                                                                               |       | 61/ | 0.04 | 0.10 |   |
| MF | 0050 extracellular matrix binding                                                                                                 | 3/292 | 226 | 405  | 047  | 3 |
|    | 840                                                                                                                               |       | 69  | 439  | 493  |   |
|    | GO:                                                                                                                               |       | 104 | 0.04 | 0.10 |   |
| MF | 0051 phosphoprotein binding                                                                                                       | 4/292 | /22 | 562  | 327  | 4 |
|    | 219                                                                                                                               |       | 669 | 398  | 232  |   |
|    | GO: oxidoreductase activity, acting on single donors with incorporation of molecular oxygen, incorporation of two atoms of oxygen | 2/292 | 28/ | 0.05 | 0.11 |   |
| MF | 0016                                                                                                                              |       | 226 | 017  | 272  | 2 |
|    | 702                                                                                                                               |       | 69  | 46   | 533  |   |
|    | GO: oxidoreductase activity, acting on single donors with incorporation of molecular oxygen                                       | 2/292 | 29/ | 0.05 | 0.11 |   |
| MF | 0016                                                                                                                              |       | 226 | 344  | 918  | 2 |
|    | 701                                                                                                                               |       | 69  | 433  | 19   |   |
|    | GO:                                                                                                                               |       | 67/ | 0.05 | 0.12 |   |
| MF | 0035 glutamate receptor binding                                                                                                   | 3/292 | 226 | 548  | 281  | 3 |
|    | 254                                                                                                                               |       | 69  | 09   | 375  |   |
|    | GO:                                                                                                                               |       | 31/ | 0.06 | 0.13 |   |
| MF | 0001 fibronectin binding                                                                                                          | 2/292 | 226 | 020  | 229  | 2 |
|    | 968                                                                                                                               |       | 69  | 157  | 081  |   |

|    |                                              |       |     |      |      |   |
|----|----------------------------------------------|-------|-----|------|------|---|
|    | GO:                                          |       | 32/ | 0.06 | 0.13 |   |
| MF | 0035 histone acetyltransferase binding       | 2/292 | 226 | 368  | 793  | 2 |
|    | 035                                          |       | 69  | 429  | 037  |   |
|    | GO:                                          |       | 32/ | 0.06 | 0.13 |   |
| MF | 0042 retinoic acid receptor binding          | 2/292 | 226 | 368  | 793  | 2 |
|    | 974                                          |       | 69  | 429  | 037  |   |
|    | GO:                                          |       | 73/ | 0.06 | 0.14 |   |
| MF | 0070 repressing transcription factor binding | 3/292 | 226 | 816  | 658  | 3 |
|    | 491                                          |       | 69  | 89   | 877  |   |
|    | GO:                                          |       | 223 | 0.06 | 0.14 |   |
| MF | 0019 phosphatase binding                     | 6/292 | /22 | 937  | 714  | 6 |
|    | 902                                          |       | 669 | 126  | 431  |   |
|    | GO:                                          |       | 170 | 0.06 | 0.14 |   |
| MF | 0019 protein kinase regulator activity       | 5/292 | /22 | 940  | 714  | 5 |
|    | 887                                          |       | 669 | 478  | 431  |   |
|    | GO:                                          |       | 34/ | 0.07 | 0.14 |   |
| MF | 0097 disordered domain specific binding      | 2/292 | 226 | 084  | 915  | 2 |
|    | 718                                          |       | 69  | 632  | 015  |   |
|    | GO:                                          |       | 176 | 0.07 | 0.16 |   |
| MF | 0019 protein phosphatase binding             | 5/292 | /22 | 789  | 284  | 5 |
|    | 903                                          |       | 669 | 233  | 507  |   |
|    | GO:                                          |       | 82/ | 0.08 | 0.18 |   |
| MF | 0033 monocarboxylic acid binding             | 3/292 | 226 | 940  | 515  | 3 |
|    | 293                                          |       | 69  | 358  | 86   |   |
|    | GO:                                          |       | 39/ | 0.08 | 0.18 |   |
| MF | 0035 ionotropic glutamate receptor binding   | 2/292 | 226 | 979  | 515  | 2 |
|    | 255                                          |       | 69  | 545  | 86   |   |
|    | GO:                                          |       | 40/ | 0.09 | 0.19 |   |
| MF | 0042 actinin binding                         | 2/292 | 226 | 374  | 069  | 2 |
|    | 805                                          |       | 69  | 745  | 538  |   |
|    | GO:                                          |       | 40/ | 0.09 | 0.19 |   |
| MF | 0051 4 iron, 4 sulfur cluster binding        | 2/292 | 226 | 374  | 069  | 2 |
|    | 539                                          |       | 69  | 745  | 538  |   |
|    | GO:                                          |       | 85/ | 0.09 | 0.19 |   |
| MF | 0033 activating transcription factor binding | 3/292 | 226 | 702  | 488  | 3 |
|    | 613                                          |       | 69  | 744  | 441  |   |
|    | GO:                                          |       | 41/ | 0.09 | 0.19 |   |
| MF | 0001 G-protein alpha-subunit binding         | 2/292 | 226 | 774  | 488  | 2 |
|    | 965                                          |       | 69  | 884  | 441  |   |
|    | GO:                                          |       | 41/ | 0.09 | 0.19 |   |
| MF | 0043 cysteine-type endopeptidase regulator   | 2/292 | 226 | 774  | 488  | 2 |
|    | 028 activity involved in apoptotic process   |       | 69  | 884  | 441  |   |



|    |                                                                |       |     |      |      |   |  |
|----|----------------------------------------------------------------|-------|-----|------|------|---|--|
|    | GO:                                                            |       | 44/ | 0.11 | 0.21 |   |  |
| MF | 0005 signal sequence binding                                   | 2/292 | 226 | 003  | 650  | 2 |  |
|    | 048                                                            |       | 69  | 037  | 283  |   |  |
|    | GO:                                                            |       | 44/ | 0.11 | 0.21 |   |  |
| MF | 0042 SH2 domain binding                                        | 2/292 | 226 | 003  | 650  | 2 |  |
|    | 169                                                            |       | 69  | 037  | 283  |   |  |
|    | GO:                                                            |       | 143 | 0.11 | 0.22 |   |  |
| MF | 0016 channel regulator activity                                | 4/292 | /22 | 369  | 225  | 4 |  |
|    | 247                                                            |       | 669 | 138  | 383  |   |  |
|    | GO:                                                            |       | 93/ | 0.11 | 0.22 |   |  |
| MF | 0003 single-stranded RNA binding                               | 3/292 | 226 | 856  | 462  | 3 |  |
|    | 727                                                            |       | 69  | 9    | 103  |   |  |
|    | GO:                                                            |       | 10/ | 0.12 | 0.22 |   |  |
| MF | 0001 complement component C1q complex binding                  | 1/292 | 226 | 161  | 462  | 1 |  |
|    | 849                                                            |       | 69  | 737  | 103  |   |  |
|    | GO:                                                            |       | 10/ | 0.12 | 0.22 |   |  |
| MF | 0005 iron ion transmembrane transporter activity               | 1/292 | 226 | 161  | 462  | 1 |  |
|    | 381                                                            |       | 69  | 737  | 103  |   |  |
|    | GO:                                                            |       | 10/ | 0.12 | 0.22 |   |  |
| MF | 0008 3'-5'-exodeoxyribonuclease activity                       | 1/292 | 226 | 161  | 462  | 1 |  |
|    | 296                                                            |       | 69  | 737  | 103  |   |  |
|    | GO:                                                            |       | 10/ | 0.12 | 0.22 |   |  |
| MF | 0016 superoxide-generating NAD(P)H oxidase activity            | 1/292 | 226 | 161  | 462  | 1 |  |
|    | 175                                                            |       | 69  | 737  | 103  |   |  |
|    | GO:                                                            |       | 10/ | 0.12 | 0.22 |   |  |
| MF | 0034 U3 snoRNA binding                                         | 1/292 | 226 | 161  | 462  | 1 |  |
|    | 511                                                            |       | 69  | 737  | 103  |   |  |
|    | GO:                                                            |       | 10/ | 0.12 | 0.22 |   |  |
| MF | 0050 arachidonic acid binding                                  | 1/292 | 226 | 161  | 462  | 1 |  |
|    | 544                                                            |       | 69  | 737  | 103  |   |  |
|    | GO:                                                            |       | 10/ | 0.12 | 0.22 |   |  |
| MF | 0061 Lys63-specific deubiquitinase activity                    | 1/292 | 226 | 161  | 462  | 1 |  |
|    | 578                                                            |       | 69  | 737  | 103  |   |  |
|    | GO:                                                            |       | 10/ | 0.12 | 0.22 |   |  |
| MF | 0070 activin receptor binding                                  | 1/292 | 226 | 161  | 462  | 1 |  |
|    | 697                                                            |       | 69  | 737  | 103  |   |  |
|    | GO:                                                            |       | 148 | 0.12 | 0.22 |   |  |
| MF | 0005 extracellular matrix structural constituent               | 4/292 | /22 | 454  | 863  | 4 |  |
|    | 201                                                            |       | 669 | 762  | 042  |   |  |
|    | GO:                                                            |       | 49/ | 0.13 | 0.23 |   |  |
| MF | 0001 RNA polymerase II activating transcription factor binding | 2/292 | 226 | 131  | 404  | 2 |  |
|    | 102                                                            |       | 69  | 628  | 083  |   |  |

|    |      |                                                                                              |       |      |      |     |   |
|----|------|----------------------------------------------------------------------------------------------|-------|------|------|-----|---|
|    | GO:  |                                                                                              | 11/   | 0.13 | 0.23 |     |   |
| MF | 0016 | hydrolase activity, acting on carbon-nitrogen<br>(but not peptide) bonds, in linear amidines | 1/292 | 226  | 293  | 404 | 1 |
|    | 813  |                                                                                              |       | 69   | 683  | 083 |   |
|    | GO:  |                                                                                              | 11/   | 0.13 | 0.23 |     |   |
| MF | 0017 | phospholipid scramblase activity                                                             | 1/292 | 226  | 293  | 404 | 1 |
|    | 128  |                                                                                              |       | 69   | 683  | 083 |   |
|    | GO:  |                                                                                              | 11/   | 0.13 | 0.23 |     |   |
| MF | 0032 | bile acid binding                                                                            | 1/292 | 226  | 293  | 404 | 1 |
|    | 052  |                                                                                              |       | 69   | 683  | 083 |   |
|    | GO:  |                                                                                              | 11/   | 0.13 | 0.23 |     |   |
| MF | 0043 | insulin receptor substrate binding                                                           | 1/292 | 226  | 293  | 404 | 1 |
|    | 560  |                                                                                              |       | 69   | 683  | 083 |   |
|    | GO:  |                                                                                              | 11/   | 0.13 | 0.23 |     |   |
| MF | 0050 | icosanoid binding                                                                            | 1/292 | 226  | 293  | 404 | 1 |
|    | 542  |                                                                                              |       | 69   | 683  | 083 |   |
|    | GO:  |                                                                                              | 11/   | 0.13 | 0.23 |     |   |
| MF | 0050 | icosatetraenoic acid binding                                                                 | 1/292 | 226  | 293  | 404 | 1 |
|    | 543  |                                                                                              |       | 69   | 683  | 083 |   |
|    | GO:  |                                                                                              | 12/   | 0.14 | 0.24 |     |   |
| MF | 0005 | profilin binding                                                                             | 1/292 | 226  | 411  | 717 | 1 |
|    | 522  |                                                                                              |       | 69   | 092  | 746 |   |
|    | GO:  |                                                                                              | 12/   | 0.14 | 0.24 |     |   |
| MF | 0008 | cysteine-type endopeptidase activator<br>activity involved in apoptotic process              | 1/292 | 226  | 411  | 717 | 1 |
|    | 656  |                                                                                              |       | 69   | 092  | 746 |   |
|    | GO:  |                                                                                              | 12/   | 0.14 | 0.24 |     |   |
| MF | 0031 | protein tag                                                                                  | 1/292 | 226  | 411  | 717 | 1 |
|    | 386  |                                                                                              |       | 69   | 092  | 746 |   |
|    | GO:  |                                                                                              | 12/   | 0.14 | 0.24 |     |   |
| MF | 0033 | sialic acid binding                                                                          | 1/292 | 226  | 411  | 717 | 1 |
|    | 691  |                                                                                              |       | 69   | 092  | 746 |   |
|    | GO:  |                                                                                              | 52/   | 0.14 | 0.24 |     |   |
| MF | 0005 | fatty acid binding                                                                           | 2/292 | 226  | 450  | 717 | 2 |
|    | 504  |                                                                                              |       | 69   | 375  | 746 |   |
|    | GO:  |                                                                                              | 53/   | 0.14 | 0.25 |     |   |
| MF | 0004 | peroxidase activity                                                                          | 2/292 | 226  | 895  | 335 | 2 |
|    | 601  |                                                                                              |       | 69   | 944  | 95  |   |
|    | GO:  |                                                                                              | 13/   | 0.15 | 0.25 |     |   |
| MF | 0031 | insulin-like growth factor I binding                                                         | 1/292 | 226  | 514  | 522 | 1 |
|    | 994  |                                                                                              |       | 69   | 149  | 269 |   |
|    | GO:  |                                                                                              | 13/   | 0.15 | 0.25 |     |   |
| MF | 0035 | G protein-coupled glutamate receptor<br>binding                                              | 1/292 | 226  | 514  | 522 | 1 |
|    | 256  |                                                                                              |       | 69   | 149  | 269 |   |

|    |                                                                                  |       |     |      |      |   |
|----|----------------------------------------------------------------------------------|-------|-----|------|------|---|
|    | GO:                                                                              |       | 13/ | 0.15 | 0.25 |   |
| MF | 0035 cAMP response element binding                                               | 1/292 | 226 | 514  | 522  | 1 |
|    | 497                                                                              |       | 69  | 149  | 269  |   |
|    | GO:                                                                              |       | 13/ | 0.15 | 0.25 |   |
| MF | 0042 phosphate ion binding                                                       | 1/292 | 226 | 514  | 522  | 1 |
|    | 301                                                                              |       | 69  | 149  | 269  |   |
|    | GO:                                                                              |       | 13/ | 0.15 | 0.25 |   |
| MF | 0051 metal ion:proton antiporter activity                                        | 1/292 | 226 | 514  | 522  | 1 |
|    | 139                                                                              |       | 69  | 149  | 269  |   |
|    | GO:                                                                              |       | 13/ | 0.15 | 0.25 |   |
| MF | 1901 catecholamine binding                                                       | 1/292 | 226 | 514  | 522  | 1 |
|    | 338                                                                              |       | 69  | 149  | 269  |   |
|    | GO:                                                                              |       | 344 | 0.15 | 0.25 |   |
| MF | 0001 DNA-binding transcription repressor activity,<br>RNA polymerase II-specific | 7/292 | /22 | 742  | 565  | 7 |
|    | 227                                                                              |       | 669 | 37   | 478  |   |
|    | GO:                                                                              |       | 55/ | 0.15 | 0.25 |   |
| MF | 0031 polyubiquitin modification-dependent<br>protein binding                     | 2/292 | 226 | 795  | 565  | 2 |
|    | 593                                                                              |       | 69  | 175  | 478  |   |
|    | GO:                                                                              |       | 55/ | 0.15 | 0.25 |   |
| MF | 0032 sterol binding                                                              | 2/292 | 226 | 795  | 565  | 2 |
|    | 934                                                                              |       | 69  | 175  | 478  |   |
|    | GO:                                                                              |       | 345 | 0.15 | 0.25 |   |
| MF | 0001 DNA-binding transcription repressor activity                                | 7/292 | /22 | 904  | 604  | 7 |
|    | 217                                                                              |       | 669 | 458  | 7    |   |
|    | GO:                                                                              |       | 14/ | 0.16 | 0.25 |   |
| MF | 0005 insulin-like growth factor receptor binding                                 | 1/292 | 226 | 603  | 898  | 1 |
|    | 159                                                                              |       | 69  | 038  | 384  |   |
|    | GO:                                                                              |       | 14/ | 0.16 | 0.25 |   |
| MF | 0005 tropomyosin binding                                                         | 1/292 | 226 | 603  | 898  | 1 |
|    | 523                                                                              |       | 69  | 038  | 384  |   |
|    | GO:                                                                              |       | 14/ | 0.16 | 0.25 |   |
| MF | 0008 metalloendopeptidase inhibitor activity                                     | 1/292 | 226 | 603  | 898  | 1 |
|    | 191                                                                              |       | 69  | 038  | 384  |   |
|    | GO:                                                                              |       | 14/ | 0.16 | 0.25 |   |
| MF | 0016 peptidase activator activity involved in<br>apoptotic process               | 1/292 | 226 | 603  | 898  | 1 |
|    | 505                                                                              |       | 69  | 038  | 384  |   |
|    | GO:                                                                              |       | 14/ | 0.16 | 0.25 |   |
| MF | 0036 BMP binding                                                                 | 1/292 | 226 | 603  | 898  | 1 |
|    | 122                                                                              |       | 69  | 038  | 384  |   |
|    | GO:                                                                              |       | 14/ | 0.16 | 0.25 |   |
| MF | 0051 serotonin binding                                                           | 1/292 | 226 | 603  | 898  | 1 |
|    | 378                                                                              |       | 69  | 038  | 384  |   |

|    |      |                                               |       |      |      |       |
|----|------|-----------------------------------------------|-------|------|------|-------|
|    | GO:  |                                               | 226   | 0.16 | 0.26 |       |
| MF | 0031 | carboxylic acid binding                       | 5/292 | /22  | 796  | 065 5 |
|    | 406  |                                               |       | 669  | 999  | 88    |
|    | GO:  |                                               |       | 58/  | 0.17 | 0.26  |
| MF | 0016 | oxidoreductase activity, acting on peroxide   | 2/292 | 226  | 162  | 226 2 |
|    | 684  | as acceptor                                   |       | 69   | 14   | 941   |
|    | GO:  |                                               |       | 58/  | 0.17 | 0.26  |
| MF | 0022 | transmitter-gated ion channel activity        | 2/292 | 226  | 162  | 226 2 |
|    | 824  |                                               |       | 69   | 14   | 941   |
|    | GO:  |                                               |       | 58/  | 0.17 | 0.26  |
| MF | 0022 | transmitter-gated channel activity            | 2/292 | 226  | 162  | 226 2 |
|    | 835  |                                               |       | 69   | 14   | 941   |
|    | GO:  |                                               |       | 15/  | 0.17 | 0.26  |
| MF | 0019 | intermediate filament binding                 | 1/292 | 226  | 677  | 743 1 |
|    | 215  |                                               |       | 69   | 94   | 67    |
|    | GO:  |                                               |       | 15/  | 0.17 | 0.26  |
| MF | 0045 | bioactive lipid receptor activity             | 1/292 | 226  | 677  | 743 1 |
|    | 125  |                                               |       | 69   | 94   | 67    |
|    | GO:  |                                               |       | 16/  | 0.18 | 0.27  |
| MF | 0016 | intramolecular oxidoreductase activity,       | 1/292 | 226  | 739  | 790 1 |
|    | 863  | transposing C=C bonds                         |       | 69   | 035  | 324   |
|    | GO:  |                                               |       | 16/  | 0.18 | 0.27  |
| MF | 0043 | amine binding                                 | 1/292 | 226  | 739  | 790 1 |
|    | 176  |                                               |       | 69   | 035  | 324   |
|    | GO:  |                                               |       | 16/  | 0.18 | 0.27  |
| MF | 0048 | receptor antagonist activity                  | 1/292 | 226  | 739  | 790 1 |
|    | 019  |                                               |       | 69   | 035  | 324   |
|    | GO:  |                                               |       | 16/  | 0.18 | 0.27  |
| MF | 0050 | oxidoreductase activity, acting on NAD(P)H,   | 1/292 | 226  | 739  | 790 1 |
|    | 664  | oxygen as acceptor                            |       | 69   | 035  | 324   |
|    | GO:  |                                               |       | 17/  | 0.19 | 0.29  |
| MF | 0001 | opsonin binding                               | 1/292 | 226  | 786  | 057 1 |
|    | 846  |                                               |       | 69   | 499  | 451   |
|    | GO:  |                                               |       | 17/  | 0.19 | 0.29  |
| MF | 0016 | palmitoyl-CoA hydrolase activity              | 1/292 | 226  | 786  | 057 1 |
|    | 290  |                                               |       | 69   | 499  | 451   |
|    | GO:  |                                               |       | 241  | 0.20 | 0.29  |
| MF | 0043 | organic acid binding                          | 5/292 | /22  | 069  | 330 5 |
|    | 177  |                                               |       | 669  | 844  | 483   |
|    | GO:  |                                               |       | 18/  | 0.20 | 0.29  |
| MF | 0004 | phosphatidylinositol phospholipase C activity | 1/292 | 226  | 820  | 524 1 |
|    | 435  |                                               |       | 69   | 506  | 214   |

|    |                                                                                        |       |     |      |      |   |
|----|----------------------------------------------------------------------------------------|-------|-----|------|------|---|
|    | GO:                                                                                    |       | 18/ | 0.20 | 0.29 |   |
| MF | 0004 phospholipase C activity                                                          | 1/292 | 226 | 820  | 524  | 1 |
|    | 629                                                                                    |       | 69  | 506  | 214  |   |
|    | GO:                                                                                    |       | 18/ | 0.20 | 0.29 |   |
| MF | 0015 solute:proton antiporter activity                                                 | 1/292 | 226 | 820  | 524  | 1 |
|    | 299                                                                                    |       | 69  | 506  | 214  |   |
|    | GO:                                                                                    |       | 122 | 0.20 | 0.29 |   |
| MF | 0008 drug binding                                                                      | 3/292 | 722 | 827  | 524  | 3 |
|    | 144                                                                                    |       | 669 | 229  | 214  |   |
|    | GO:                                                                                    |       | 66/ | 0.20 | 0.29 |   |
| MF | 0043 protein self-association                                                          | 2/292 | 226 | 888  | 524  | 2 |
|    | 621                                                                                    |       | 69  | 897  | 214  |   |
|    | GO:                                                                                    |       | 66/ | 0.20 | 0.29 |   |
| MF | 0051 iron-sulfur cluster binding                                                       | 2/292 | 226 | 888  | 524  | 2 |
|    | 536                                                                                    |       | 69  | 897  | 214  |   |
|    | GO:                                                                                    |       | 66/ | 0.20 | 0.29 |   |
| MF | 0051 metal cluster binding                                                             | 2/292 | 226 | 888  | 524  | 2 |
|    | 540                                                                                    |       | 69  | 897  | 214  |   |
|    | GO:                                                                                    |       | 19/ | 0.21 | 0.30 |   |
| MF | 0042 MHC class I protein binding                                                       | 1/292 | 226 | 841  | 673  | 1 |
|    | 288                                                                                    |       | 69  | 23   | 131  |   |
|    | GO:                                                                                    |       | 186 | 0.21 | 0.30 |   |
| MF | 0004 serine-type endopeptidase activity                                                | 4/292 | 722 | 905  | 673  | 4 |
|    | 252                                                                                    |       | 669 | 549  | 131  |   |
|    | GO:                                                                                    |       | 70/ | 0.22 | 0.30 |   |
| MF | 0005 extracellular ligand-gated ion channel activity                                   | 2/292 | 226 | 782  | 985  | 2 |
|    | 230                                                                                    |       | 69  | 606  | 15   |   |
|    | GO:                                                                                    |       | 70/ | 0.22 | 0.30 |   |
| MF | 1990 promoter-specific chromatin binding                                               | 2/292 | 226 | 782  | 985  | 2 |
|    | 841                                                                                    |       | 69  | 606  | 15   |   |
|    | GO:                                                                                    |       | 20/ | 0.22 | 0.30 |   |
| MF | 0001 RNA polymerase II general transcription initiation factor binding                 | 1/292 | 226 | 848  | 985  | 1 |
|    | 091                                                                                    |       | 69  | 84   | 15   |   |
|    | GO:                                                                                    |       | 20/ | 0.22 | 0.30 |   |
| MF | 0008 structural constituent of muscle                                                  | 1/292 | 226 | 848  | 985  | 1 |
|    | 307                                                                                    |       | 69  | 84   | 15   |   |
|    | GO:                                                                                    |       | 20/ | 0.22 | 0.30 |   |
| MF | 0016 oxidoreductase activity, acting on the CH-NH2 group of donors, oxygen as acceptor | 1/292 | 226 | 848  | 985  | 1 |
|    | 641                                                                                    |       | 69  | 84   | 15   |   |
|    | GO:                                                                                    |       | 20/ | 0.22 | 0.30 |   |
| MF | 0036 long-chain fatty acid binding                                                     | 1/292 | 226 | 848  | 985  | 1 |
|    | 041                                                                                    |       | 69  | 84   | 15   |   |

|    |                                                                          |       |     |      |      |   |
|----|--------------------------------------------------------------------------|-------|-----|------|------|---|
|    | GO:                                                                      |       | 20/ | 0.22 | 0.30 |   |
| MF | 0099 structural constituent of postsynapse                               | 1/292 | 226 | 848  | 985  | 1 |
|    | 186                                                                      |       | 69  | 84   | 15   |   |
|    | GO:                                                                      |       | 21/ | 0.23 | 0.32 |   |
| MF | 0004 exodeoxyribonuclease activity                                       | 1/292 | 226 | 843  | 045  | 1 |
|    | 529                                                                      |       | 69  | 504  | 31   |   |
|    | GO:                                                                      |       | 21/ | 0.23 | 0.32 |   |
| MF | 0016 exodeoxyribonuclease activity, producing 5'-<br>phosphomonoesters   | 1/292 | 226 | 843  | 045  | 1 |
|    | 895                                                                      |       | 69  | 504  | 31   |   |
|    | GO:                                                                      |       | 22/ | 0.24 | 0.32 |   |
| MF | 0008 nuclear localization sequence binding                               | 1/292 | 226 | 825  | 636  | 1 |
|    | 139                                                                      |       | 69  | 387  | 455  |   |
|    | GO:                                                                      |       | 22/ | 0.24 | 0.32 |   |
| MF | 0019 immunoglobulin binding                                              | 1/292 | 226 | 825  | 636  | 1 |
|    | 865                                                                      |       | 69  | 387  | 455  |   |
|    | GO:                                                                      |       | 22/ | 0.24 | 0.32 |   |
| MF | 0048 tau protein binding                                                 | 1/292 | 226 | 825  | 636  | 1 |
|    | 156                                                                      |       | 69  | 387  | 455  |   |
|    | GO:                                                                      |       | 22/ | 0.24 | 0.32 |   |
| MF | 0050 nitric-oxide synthase binding                                       | 1/292 | 226 | 825  | 636  | 1 |
|    | 998                                                                      |       | 69  | 387  | 455  |   |
|    | GO:                                                                      |       | 22/ | 0.24 | 0.32 |   |
| MF | 0070 K63-linked polyubiquitin modification-<br>dependent protein binding | 1/292 | 226 | 825  | 636  | 1 |
|    | 530                                                                      |       | 69  | 387  | 455  |   |
|    | GO:                                                                      |       | 75/ | 0.25 | 0.32 |   |
| MF | 0004 exonuclease activity                                                | 2/292 | 226 | 164  | 796  | 2 |
|    | 527                                                                      |       | 69  | 848  | 293  |   |
|    | GO:                                                                      |       | 75/ | 0.25 | 0.32 |   |
| MF | 0043 ubiquitin binding                                                   | 2/292 | 226 | 164  | 796  | 2 |
|    | 130                                                                      |       | 69  | 848  | 293  |   |
|    | GO:                                                                      |       | 23/ | 0.25 | 0.33 |   |
| MF | 0016 oxidoreductase activity, acting on the CH-<br>NH2 group of donors   | 1/292 | 226 | 794  | 472  | 1 |
|    | 638                                                                      |       | 69  | 654  | 192  |   |
|    | GO:                                                                      |       | 24/ | 0.26 | 0.33 |   |
| MF | 0015 cation:cation antiporter activity                                   | 1/292 | 226 | 751  | 981  | 1 |
|    | 491                                                                      |       | 69  | 466  | 431  |   |
|    | GO:                                                                      |       | 24/ | 0.26 | 0.33 |   |
| MF | 0031 G-protein beta-subunit binding                                      | 1/292 | 226 | 751  | 981  | 1 |
|    | 681                                                                      |       | 69  | 466  | 431  |   |
|    | GO:                                                                      |       | 24/ | 0.26 | 0.33 |   |
| MF | 0051 glycolipid binding                                                  | 1/292 | 226 | 751  | 981  | 1 |
|    | 861                                                                      |       | 69  | 466  | 431  |   |

|    |                                                   |       |     |      |      |   |
|----|---------------------------------------------------|-------|-----|------|------|---|
|    | GO:                                               |       | 24/ | 0.26 | 0.33 |   |
| MF | 0070 R-SMAD binding                               | 1/292 | 226 | 751  | 981  | 1 |
|    | 412                                               |       | 69  | 466  | 431  |   |
|    | GO:                                               |       | 24/ | 0.26 | 0.33 |   |
| MF | 0140 intramembrane lipid transporter activity     | 1/292 | 226 | 751  | 981  | 1 |
|    | 303                                               |       | 69  | 466  | 431  |   |
|    | GO:                                               |       | 140 | 0.26 | 0.34 |   |
| MF | 0016 hydrolase activity, acting on glycosyl bonds | 3/292 | /22 | 975  | 120  | 3 |
|    | 798                                               |       | 669 | 165  | 343  |   |
|    | GO:                                               |       | 25/ | 0.27 | 0.34 |   |
| MF | 0000 fatty-acyl-CoA binding                       | 1/292 | 226 | 695  | 120  | 1 |
|    | 062                                               |       | 69  | 982  | 343  |   |
|    | GO:                                               |       | 25/ | 0.27 | 0.34 |   |
| MF | 0005 structural constituent of eye lens           | 1/292 | 226 | 695  | 120  | 1 |
|    | 212                                               |       | 69  | 982  | 343  |   |
|    | GO:                                               |       | 25/ | 0.27 | 0.34 |   |
| MF | 0009 cyclase activity                             | 1/292 | 226 | 695  | 120  | 1 |
|    | 975                                               |       | 69  | 982  | 343  |   |
|    | GO:                                               |       | 25/ | 0.27 | 0.34 |   |
| MF | 0016 phosphorus-oxygen lyase activity             | 1/292 | 226 | 695  | 120  | 1 |
|    | 849                                               |       | 69  | 982  | 343  |   |
|    | GO:                                               |       | 25/ | 0.27 | 0.34 |   |
| MF | 0031 mitogen-activated protein kinase kinase      | 1/292 | 226 | 695  | 120  | 1 |
|    | 435 kinase binding                                |       | 69  | 982  | 343  |   |
|    | GO:                                               |       | 25/ | 0.27 | 0.34 |   |
| MF | 0048 mRNA 5'-UTR binding                          | 1/292 | 226 | 695  | 120  | 1 |
|    | 027                                               |       | 69  | 982  | 343  |   |
|    | GO:                                               |       | 207 | 0.27 | 0.34 |   |
| MF | 0008 serine-type peptidase activity               | 4/292 | /22 | 767  | 120  | 4 |
|    | 236                                               |       | 669 | 517  | 343  |   |
|    | GO:                                               |       | 274 | 0.27 | 0.34 |   |
| MF | 0030 carbohydrate binding                         | 5/292 | /22 | 897  | 140  | 5 |
|    | 246                                               |       | 669 | 015  | 121  |   |
|    | GO:                                               |       | 26/ | 0.28 | 0.34 |   |
| MF | 0017 TBP-class protein binding                    | 1/292 | 226 | 628  | 613  | 1 |
|    | 025                                               |       | 69  | 36   | 025  |   |
|    | GO:                                               |       | 26/ | 0.28 | 0.34 |   |
| MF | 0019 oxygen binding                               | 1/292 | 226 | 628  | 613  | 1 |
|    | 825                                               |       | 69  | 36   | 025  |   |
|    | GO:                                               |       | 26/ | 0.28 | 0.34 |   |
| MF | 0047 acyl-CoA hydrolase activity                  | 1/292 | 226 | 628  | 613  | 1 |
|    | 617                                               |       | 69  | 36   | 025  |   |

|                                               |       |     |      |      |   |
|-----------------------------------------------|-------|-----|------|------|---|
| GO:                                           |       | 83/ | 0.28 | 0.34 |   |
| MF 0008 phosphoric diester hydrolase activity | 2/292 | 226 | 984  | 903  | 2 |
| 081                                           |       | 69  | 927  | 954  |   |
| GO:                                           |       | 212 | 0.29 | 0.35 |   |
| MF 0017 serine hydrolase activity             | 4/292 | 722 | 201  | 022  | 4 |
| 171                                           |       | 669 | 658  | 562  |   |
| GO:                                           |       | 84/ | 0.29 | 0.35 |   |
| MF 0016 antioxidant activity                  | 2/292 | 226 | 461  | 022  | 2 |
| 209                                           |       | 69  | 492  | 562  |   |
| GO:                                           |       | 84/ | 0.29 | 0.35 |   |
| MF 0046 SMAD binding                          | 2/292 | 226 | 461  | 022  | 2 |
| 332                                           |       | 69  | 492  | 562  |   |
| GO:                                           |       | 27/ | 0.29 | 0.35 |   |
| MF 0046 sphingolipid binding                  | 1/292 | 226 | 548  | 022  | 1 |
| 625                                           |       | 69  | 756  | 562  |   |
| GO:                                           |       | 28/ | 0.30 | 0.35 |   |
| MF 0016 CoA hydrolase activity                | 1/292 | 226 | 457  | 678  | 1 |
| 289                                           |       | 69  | 322  | 043  |   |
| GO:                                           |       | 28/ | 0.30 | 0.35 |   |
| MF 0043 cysteine-type endopeptidase inhibitor | 1/292 | 226 | 457  | 678  | 1 |
| 027 activity involved in apoptotic process    |       | 69  | 322  | 043  |   |
| GO:                                           |       | 28/ | 0.30 | 0.35 |   |
| MF 0120 acyl-CoA binding                      | 1/292 | 226 | 457  | 678  | 1 |
| 227                                           |       | 69  | 322  | 043  |   |
| GO:                                           |       | 29/ | 0.31 | 0.36 |   |
| MF 0015 solute:cation antiporter activity     | 1/292 | 226 | 354  | 586  | 1 |
| 298                                           |       | 69  | 211  | 31   |   |
| GO:                                           |       | 30/ | 0.32 | 0.37 |   |
| MF 0000 3'-5'-exoribonuclease activity        | 1/292 | 226 | 239  | 124  | 1 |
| 175                                           |       | 69  | 572  | 981  |   |
| GO:                                           |       | 30/ | 0.32 | 0.37 |   |
| MF 0001 lipopolysaccharide binding            | 1/292 | 226 | 239  | 124  | 1 |
| 530                                           |       | 69  | 572  | 981  |   |
| GO:                                           |       | 30/ | 0.32 | 0.37 |   |
| MF 0098 structural constituent of synapse     | 1/292 | 226 | 239  | 124  | 1 |
| 918                                           |       | 69  | 572  | 981  |   |
| GO:                                           |       | 90/ | 0.32 | 0.37 |   |
| MF 0008 beta-catenin binding                  | 2/292 | 226 | 309  | 124  | 2 |
| 013                                           |       | 69  | 118  | 981  |   |
| GO:                                           |       | 31/ | 0.33 | 0.37 |   |
| MF 0030 snoRNA binding                        | 1/292 | 226 | 113  | 904  | 1 |
| 515                                           |       | 69  | 553  | 647  |   |



|    |                                                                   |       |     |      |      |   |
|----|-------------------------------------------------------------------|-------|-----|------|------|---|
|    | GO:                                                               |       | 92/ | 0.33 | 0.37 |   |
| MF | 0051 dioxygenase activity                                         | 2/292 | 226 | 252  | 919  | 2 |
|    | 213                                                               |       | 69  | 345  | 34   |   |
|    | GO:                                                               |       | 93/ | 0.33 | 0.38 |   |
| MF | 0004 phospholipase activity                                       | 2/292 | 226 | 722  | 310  | 2 |
|    | 620                                                               |       | 69  | 574  | 452  |   |
|    | GO:                                                               |       | 32/ | 0.33 | 0.38 |   |
| MF | 0016 exoribonuclease activity, producing 5'-<br>phosphomonoesters | 1/292 | 226 | 976  | 453  | 1 |
|    | 896                                                               |       | 69  | 299  | 587  |   |
|    | GO:                                                               |       | 95/ | 0.34 | 0.39 |   |
| MF | 0032 ubiquitin-like protein binding                               | 2/292 | 226 | 659  | 080  | 2 |
|    | 182                                                               |       | 69  | 997  | 461  |   |
|    | GO:                                                               |       | 33/ | 0.34 | 0.39 |   |
| MF | 0004 exoribonuclease activity                                     | 1/292 | 226 | 827  | 123  | 1 |
|    | 532                                                               |       | 69  | 954  | 31   |   |
|    | GO:                                                               |       | 34/ | 0.35 | 0.39 |   |
| MF | 0030 receptor inhibitor activity                                  | 1/292 | 226 | 668  | 918  | 1 |
|    | 547                                                               |       | 69  | 661  | 752  |   |
|    | GO:                                                               |       | 35/ | 0.36 | 0.40 |   |
| MF | 1901 fatty acid derivative binding                                | 1/292 | 226 | 498  | 696  | 1 |
|    | 567                                                               |       | 69  | 559  | 249  |   |
|    | GO:                                                               |       | 100 | 0.36 | 0.41 |   |
| MF | 0099 ligand-gated cation channel activity                         | 2/292 | /22 | 983  | 002  | 2 |
|    | 094                                                               |       | 669 | 501  | 256  |   |
|    | GO:                                                               |       | 36/ | 0.37 | 0.41 |   |
| MF | 0016 peptidase activator activity                                 | 1/292 | 226 | 317  | 002  | 1 |
|    | 504                                                               |       | 69  | 788  | 256  |   |
|    | GO:                                                               |       | 36/ | 0.37 | 0.41 |   |
| MF | 0030 cyclic nucleotide binding                                    | 1/292 | 226 | 317  | 002  | 1 |
|    | 551                                                               |       | 69  | 788  | 256  |   |
|    | GO:                                                               |       | 36/ | 0.37 | 0.41 |   |
| MF | 0042 MHC protein binding                                          | 1/292 | 226 | 317  | 002  | 1 |
|    | 287                                                               |       | 69  | 788  | 256  |   |
|    | GO:                                                               |       | 38/ | 0.38 | 0.42 |   |
| MF | 0043 proteoglycan binding                                         | 1/292 | 226 | 924  | 457  | 1 |
|    | 394                                                               |       | 69  | 781  | 999  |   |
|    | GO:                                                               |       | 38/ | 0.38 | 0.42 |   |
| MF | 0046 transition metal ion transmembrane<br>transporter activity   | 1/292 | 226 | 924  | 457  | 1 |
|    | 915                                                               |       | 69  | 781  | 999  |   |
|    | GO:                                                               |       | 39/ | 0.39 | 0.43 |   |
| MF | 0004 protein serine/threonine/tyrosine kinase<br>activity         | 1/292 | 226 | 712  | 161  | 1 |
|    | 712                                                               |       | 69  | 813  | 18   |   |

|    |                                                         |       |     |      |      |   |
|----|---------------------------------------------------------|-------|-----|------|------|---|
|    | GO:                                                     |       | 40/ | 0.40 | 0.43 |   |
| MF | 0004 carboxypeptidase activity                          | 1/292 | 226 | 490  | 848  | 1 |
|    | 180                                                     |       | 69  | 712  | 329  |   |
|    | GO:                                                     |       | 41/ | 0.41 | 0.44 |   |
| MF | 0005 frizzled binding                                   | 1/292 | 226 | 258  | 360  | 1 |
|    | 109                                                     |       | 69  | 608  | 759  |   |
|    | GO:                                                     |       | 41/ | 0.41 | 0.44 |   |
| MF | 0017 snRNA binding                                      | 1/292 | 226 | 258  | 360  | 1 |
|    | 069                                                     |       | 69  | 608  | 759  |   |
|    | GO:                                                     |       | 111 | 0.41 | 0.44 |   |
| MF | 0030 neurotransmitter receptor activity                 | 2/292 | /22 | 971  | 554  | 2 |
|    | 594                                                     |       | 669 | 405  | 011  |   |
|    | GO:                                                     |       | 42/ | 0.42 | 0.44 |   |
| MF | 0043 protein serine/threonine kinase activator activity | 1/292 | 226 | 016  | 554  | 1 |
|    | 539                                                     |       | 69  | 629  | 011  |   |
|    | GO:                                                     |       | 42/ | 0.42 | 0.44 |   |
| MF | 0051 mitogen-activated protein kinase binding           | 1/292 | 226 | 016  | 554  | 1 |
|    | 019                                                     |       | 69  | 629  | 011  |   |
|    | GO:                                                     |       | 404 | 0.42 | 0.44 |   |
| MF | 0016 ATPase activity                                    | 6/292 | /22 | 030  | 554  | 6 |
|    | 887                                                     |       | 669 | 322  | 011  |   |
|    | GO:                                                     |       | 114 | 0.43 | 0.45 |   |
| MF | 0004 ribonuclease activity                              | 2/292 | /22 | 297  | 633  | 2 |
|    | 540                                                     |       | 669 | 294  | 651  |   |
|    | GO:                                                     |       | 44/ | 0.43 | 0.45 |   |
| MF | 0004 aminopeptidase activity                            | 1/292 | 226 | 503  | 633  | 1 |
|    | 177                                                     |       | 69  | 548  | 651  |   |
|    | GO:                                                     |       | 44/ | 0.43 | 0.45 |   |
| MF | 0048 beta-tubulin binding                               | 1/292 | 226 | 503  | 633  | 1 |
|    | 487                                                     |       | 69  | 548  | 651  |   |
|    | GO:                                                     |       | 46/ | 0.44 | 0.46 |   |
| MF | 0140 general transcription initiation factor binding    | 1/292 | 226 | 952  | 989  | 1 |
|    | 296                                                     |       | 69  | 465  | 784  |   |
|    | GO:                                                     |       | 47/ | 0.45 | 0.47 |   |
| MF | 0005 phospholipid transporter activity                  | 1/292 | 226 | 662  | 403  | 1 |
|    | 548                                                     |       | 69  | 975  | 307  |   |
|    | GO:                                                     |       | 47/ | 0.45 | 0.47 |   |
| MF | 0070 E-box binding                                      | 1/292 | 226 | 662  | 403  | 1 |
|    | 888                                                     |       | 69  | 975  | 307  |   |
|    | GO:                                                     |       | 48/ | 0.46 | 0.47 |   |
| MF | 0030 estrogen receptor binding                          | 1/292 | 226 | 364  | 638  | 1 |
|    | 331                                                     |       | 69  | 346  | 595  |   |

|                                                             |       |     |      |      |   |
|-------------------------------------------------------------|-------|-----|------|------|---|
| GO:                                                         |       | 48/ | 0.46 | 0.47 |   |
| MF 0050 NADP binding                                        | 1/292 | 226 | 364  | 638  | 1 |
| 661                                                         |       | 69  | 346  | 595  |   |
| GO:                                                         |       | 48/ | 0.46 | 0.47 |   |
| MF 0051 Hsp90 protein binding                               | 1/292 | 226 | 364  | 638  | 1 |
| 879                                                         |       | 69  | 346  | 595  |   |
| GO:                                                         |       | 197 | 0.46 | 0.47 |   |
| MF 0004 nuclease activity                                   | 3/292 | /22 | 725  | 818  | 3 |
| 518                                                         |       | 669 | 871  | 06   |   |
| GO:                                                         |       | 49/ | 0.47 | 0.47 |   |
| MF 0008 3'-5' exonuclease activity                          | 1/292 | 226 | 056  | 818  | 1 |
| 408                                                         |       | 69  | 695  | 06   |   |
| GO:                                                         |       | 49/ | 0.47 | 0.47 |   |
| MF 0015 potassium channel regulator activity                | 1/292 | 226 | 056  | 818  | 1 |
| 459                                                         |       | 69  | 695  | 06   |   |
| GO:                                                         |       | 123 | 0.47 | 0.47 |   |
| MF 0042 histone deacetylase binding                         | 2/292 | /22 | 174  | 818  | 2 |
| 826                                                         |       | 669 | 355  | 06   |   |
| GO:                                                         |       | 50/ | 0.47 | 0.47 |   |
| MF 0016 thiolester hydrolase activity                       | 1/292 | 226 | 740  | 907  | 1 |
| 790                                                         |       | 69  | 136  | 645  |   |
| GO:                                                         |       | 50/ | 0.47 | 0.47 |   |
| MF 0016 intramolecular oxidoreductase activity              | 1/292 | 226 | 740  | 907  | 1 |
| 860                                                         |       | 69  | 136  | 645  |   |
| GO:                                                         |       | 50/ | 0.47 | 0.47 |   |
| MF 0030 Hsp70 protein binding                               | 1/292 | 226 | 740  | 907  | 1 |
| 544                                                         |       | 69  | 136  | 645  |   |
| GO:                                                         |       | 51/ | 0.48 | 0.48 |   |
| MF 0016 transferase activity, transferring pentosyl groups  | 1/292 | 226 | 414  | 103  | 1 |
| 763                                                         |       | 69  | 785  | 625  |   |
| GO: exonuclease activity, active with either ribo-          |       | 51/ | 0.48 | 0.48 |   |
| MF 0016 or deoxyribonucleic acids and producing 5'-         | 1/292 | 226 | 414  | 103  | 1 |
| 796 phosphomonoesters                                       |       | 69  | 785  | 625  |   |
| GO:                                                         |       | 51/ | 0.48 | 0.48 |   |
| MF 0030 nuclear receptor transcription coactivator activity | 1/292 | 226 | 414  | 103  | 1 |
| 374                                                         |       | 69  | 785  | 625  |   |
| GO:                                                         |       | 128 | 0.49 | 0.48 |   |
| MF 0016 lipase activity                                     | 2/292 | /22 | 258  | 781  | 2 |
| 298                                                         |       | 669 | 662  | 085  |   |
| GO:                                                         |       | 439 | 0.49 | 0.49 |   |
| MF 0004 protein serine/threonine kinase activity            | 6/292 | /22 | 918  | 272  | 6 |
| 674                                                         |       | 669 | 803  | 744  |   |

|    |      |                                                                          |       |      |      |     |   |
|----|------|--------------------------------------------------------------------------|-------|------|------|-----|---|
|    | GO:  |                                                                          | 131   | 0.50 | 0.49 |     |   |
| MF | 0016 | hydrolase activity, acting on carbon-nitrogen<br>(but not peptide) bonds | 2/292 | /22  | 484  | 667 | 2 |
|    | 810  |                                                                          |       | 669  | 156  | 934 |   |
|    | GO:  |                                                                          | 132   | 0.50 | 0.49 |     |   |
| MF | 0015 | ligand-gated ion channel activity                                        | 2/292 | /22  | 888  | 876 | 2 |
|    | 276  |                                                                          |       | 669  | 385  | 686 |   |
|    | GO:  |                                                                          | 55/   | 0.51 | 0.49 |     |   |
| MF | 0035 | signaling adaptor activity                                               | 1/292 | 226  | 027  | 876 | 1 |
|    | 591  |                                                                          |       | 69   | 686  | 686 |   |
|    | GO:  |                                                                          | 290   | 0.51 | 0.50 |     |   |
| MF | 0046 | protein heterodimerization activity                                      | 4/292 | /22  | 519  | 168 | 4 |
|    | 982  |                                                                          |       | 669  | 038  | 998 |   |
|    | GO:  |                                                                          | 56/   | 0.51 | 0.50 |     |   |
| MF | 0016 | hydro-lyase activity                                                     | 1/292 | 226  | 660  | 168 | 1 |
|    | 836  |                                                                          |       | 69   | 034  | 998 |   |
|    | GO:  |                                                                          | 213   | 0.51 | 0.50 |     |   |
| MF | 0004 | endopeptidase inhibitor activity                                         | 3/292 | /22  | 901  | 241 | 3 |
|    | 866  |                                                                          |       | 669  | 782  | 698 |   |
|    | GO:  |                                                                          | 135   | 0.52 | 0.50 |     |   |
| MF | 0022 | ligand-gated channel activity                                            | 2/292 | /22  | 088  | 260 | 2 |
|    | 834  |                                                                          |       | 669  | 094  | 441 |   |
|    | GO:  |                                                                          | 58/   | 0.52 | 0.50 |     |   |
| MF | 0004 | deoxyribonuclease activity                                               | 1/292 | 226  | 900  | 881 | 1 |
|    | 536  |                                                                          |       | 69   | 422  | 186 |   |
|    | GO:  |                                                                          | 59/   | 0.53 | 0.51 |     |   |
| MF | 0001 | basal transcription machinery binding                                    | 1/292 | 226  | 508  | 139 | 1 |
|    | 098  |                                                                          |       | 69   | 669  | 446 |   |
|    | GO:  |                                                                          | 59/   | 0.53 | 0.51 |     |   |
| MF | 0001 | basal RNA polymerase II transcription<br>machinery binding               | 1/292 | 226  | 508  | 139 | 1 |
|    | 099  |                                                                          |       | 69   | 669  | 446 |   |
|    | GO:  |                                                                          | 219   | 0.53 | 0.51 |     |   |
| MF | 0030 | peptidase inhibitor activity                                             | 3/292 | /22  | 772  | 228 | 3 |
|    | 414  |                                                                          |       | 669  | 125  | 607 |   |
|    | GO:  |                                                                          | 460   | 0.54 | 0.51 |     |   |
| MF | 0008 | enzyme activator activity                                                | 6/292 | /22  | 475  | 530 | 6 |
|    | 047  |                                                                          |       | 669  | 166  | 182 |   |
|    | GO:  |                                                                          | 61/   | 0.54 | 0.51 |     |   |
| MF | 0004 | endoribonuclease activity                                                | 1/292 | 226  | 701  | 530 | 1 |
|    | 521  |                                                                          |       | 69   | 779  | 182 |   |
|    | GO:  |                                                                          | 61/   | 0.54 | 0.51 |     |   |
| MF | 0005 | copper ion binding                                                       | 1/292 | 226  | 701  | 530 | 1 |
|    | 507  |                                                                          |       | 69   | 779  | 182 |   |

|    |                                                     |       |     |      |       |
|----|-----------------------------------------------------|-------|-----|------|-------|
|    | GO:                                                 |       | 223 | 0.54 | 0.51  |
| MF | 0061 endopeptidase regulator activity               | 3/292 | /22 | 995  | 530 3 |
|    | 135                                                 |       | 669 | 829  | 182   |
|    | GO:                                                 |       | 143 | 0.55 | 0.51  |
| MF | 0044 ion channel binding                            | 2/292 | /22 | 190  | 530 2 |
|    | 325                                                 |       | 669 | 385  | 182   |
|    | GO:                                                 |       | 62/ | 0.55 | 0.51  |
| MF | 0030 manganese ion binding                          | 1/292 | 226 | 286  | 530 1 |
|    | 145                                                 |       | 69  | 841  | 182   |
|    | GO:                                                 |       | 62/ | 0.55 | 0.51  |
| MF | 0043 ribosome binding                               | 1/292 | 226 | 286  | 530 1 |
|    | 022                                                 |       | 69  | 841  | 182   |
|    | GO:                                                 |       | 63/ | 0.55 | 0.51  |
| MF | 0005 protein kinase C binding                       | 1/292 | 226 | 864  | 907 1 |
|    | 080                                                 |       | 69  | 372  | 766   |
|    | GO:                                                 |       | 146 | 0.56 | 0.52  |
| MF | 0043 ribonucleoprotein complex binding              | 2/292 | /22 | 316  | 115 2 |
|    | 021                                                 |       | 669 | 8    | 783   |
|    | GO:                                                 |       | 64/ | 0.56 | 0.52  |
| MF | 0008 G protein-coupled amine receptor activity      | 1/292 | 226 | 434  | 115 1 |
|    | 227                                                 |       | 69  | 468  | 783   |
|    | GO:                                                 |       | 65/ | 0.56 | 0.52  |
| MF | 0001 RNA polymerase II transcription factor binding | 1/292 | 226 | 997  | 474 1 |
|    | 085                                                 |       | 69  | 226  | 51    |
|    | GO:                                                 |       | 150 | 0.57 | 0.53  |
| MF | 0004 helicase activity                              | 2/292 | /22 | 786  | 039 2 |
|    | 386                                                 |       | 669 | 969  | 388   |
|    | GO:                                                 |       | 67/ | 0.58 | 0.53  |
| MF | 0016 carbon-oxygen lyase activity                   | 1/292 | 226 | 101  | 165 1 |
|    | 835                                                 |       | 69  | 099  | 62    |
|    | GO:                                                 |       | 69/ | 0.59 | 0.53  |
| MF | 0004 cysteine-type endopeptidase inhibitor activity | 1/292 | 226 | 176  | 985 1 |
|    | 869                                                 |       | 69  | 731  | 79    |
|    | GO:                                                 |       | 70/ | 0.59 | 0.54  |
| MF | 0016 amino acid binding                             | 1/292 | 226 | 704  | 302 1 |
|    | 597                                                 |       | 69  | 182  | 421   |
|    | GO:                                                 |       | 71/ | 0.60 | 0.54  |
| MF | 0005 collagen binding                               | 1/292 | 226 | 224  | 610 1 |
|    | 518                                                 |       | 69  | 842  | 985   |
|    | GO:                                                 |       | 73/ | 0.61 | 0.54  |
| MF | 0005 Rho guanyl-nucleotide exchange factor activity | 1/292 | 226 | 246  | 926 1 |
|    | 089                                                 |       | 69  | 132  | 771   |

|                                                                                                    |       |     |      |      |   |
|----------------------------------------------------------------------------------------------------|-------|-----|------|------|---|
| GO:                                                                                                |       | 73/ | 0.61 | 0.54 |   |
| MF 0005 chloride channel activity                                                                  | 1/292 | 226 | 246  | 926  | 1 |
| 254                                                                                                |       | 69  | 132  | 771  |   |
| GO:                                                                                                |       | 73/ | 0.61 | 0.54 |   |
| MF 0017 myosin binding                                                                             | 1/292 | 226 | 246  | 926  | 1 |
| 022                                                                                                |       | 69  | 132  | 771  |   |
| GO:                                                                                                |       | 160 | 0.61 | 0.54 |   |
| MF 0008 cysteine-type peptidase activity                                                           | 2/292 | /22 | 302  | 926  | 2 |
| 234                                                                                                |       | 669 | 886  | 771  |   |
| GO:                                                                                                |       | 74/ | 0.61 | 0.54 |   |
| MF 0015 antiporter activity                                                                        | 1/292 | 226 | 746  | 997  | 1 |
| 297                                                                                                |       | 69  | 935  | 27   |   |
| GO:                                                                                                |       | 74/ | 0.61 | 0.54 |   |
| MF 0097 scaffold protein binding                                                                   | 1/292 | 226 | 746  | 997  | 1 |
| 110                                                                                                |       | 69  | 935  | 27   |   |
| GO:                                                                                                |       | 254 | 0.63 | 0.56 |   |
| MF 0061 peptidase regulator activity                                                               | 3/292 | /22 | 799  | 658  | 3 |
| 134                                                                                                |       | 669 | 801  | 106  |   |
| GO:                                                                                                |       | 80/ | 0.64 | 0.57 |   |
| MF 0016 hydrolase activity, acting on carbon-nitrogen<br>(but not peptide) bonds, in linear amides | 1/292 | 226 | 619  | 216  | 1 |
| 811                                                                                                |       | 69  | 163  | 968  |   |
| GO:                                                                                                |       | 82/ | 0.65 | 0.57 |   |
| MF 0048 monosaccharide binding                                                                     | 1/292 | 226 | 527  | 851  | 1 |
| 029                                                                                                |       | 69  | 982  | 529  |   |
| GO:                                                                                                |       | 83/ | 0.65 | 0.57 |   |
| MF 0005 anion channel activity                                                                     | 1/292 | 226 | 973  | 905  | 1 |
| 253                                                                                                |       | 69  | 629  | 349  |   |
| GO:                                                                                                |       | 83/ | 0.65 | 0.57 |   |
| MF 0016 oxidoreductase activity, acting on NAD(P)H                                                 | 1/292 | 226 | 973  | 905  | 1 |
| 651                                                                                                |       | 69  | 629  | 349  |   |
| GO:                                                                                                |       | 89/ | 0.68 | 0.59 |   |
| MF 0048 calcium-dependent protein binding                                                          | 1/292 | 226 | 529  | 973  | 1 |
| 306                                                                                                |       | 69  | 482  | 782  |   |
| GO:                                                                                                |       | 91/ | 0.69 | 0.60 |   |
| MF 0008 exopeptidase activity                                                                      | 1/292 | 226 | 338  | 505  | 1 |
| 238                                                                                                |       | 69  | 178  | 626  |   |
| GO:                                                                                                |       | 453 | 0.69 | 0.60 |   |
| MF 0004 endopeptidase activity                                                                     | 5/292 | /22 | 655  | 606  | 5 |
| 175                                                                                                |       | 669 | 6    | 941  |   |
| GO:                                                                                                |       | 188 | 0.69 | 0.60 |   |
| MF 0016 lyase activity                                                                             | 2/292 | /22 | 948  | 686  | 2 |
| 829                                                                                                |       | 669 | 571  | 46   |   |

|    |                                                           |       |     |      |      |   |
|----|-----------------------------------------------------------|-------|-----|------|------|---|
|    | GO:                                                       |       | 94/ | 0.70 | 0.60 |   |
| MF | 0031 chromatin DNA binding                                | 1/292 | 226 | 512  | 999  | 1 |
|    | 490                                                       |       | 69  | 553  | 97   |   |
|    | GO:                                                       |       | 192 | 0.71 | 0.61 |   |
| MF | 0140 modification-dependent protein binding               | 2/292 | /22 | 043  | 283  | 2 |
|    | 030                                                       |       | 669 | 961  | 586  |   |
|    | GO:                                                       |       | 96/ | 0.71 | 0.61 |   |
| MF | 0004 cysteine-type endopeptidase activity                 | 1/292 | 226 | 270  | 303  | 1 |
|    | 197                                                       |       | 69  | 456  | 31   |   |
|    | GO:                                                       |       | 97/ | 0.71 | 0.61 |   |
| MF | 0051 ATPase binding                                       | 1/292 | 226 | 642  | 447  | 1 |
|    | 117                                                       |       | 69  | 096  | 412  |   |
|    | GO:                                                       |       | 99/ | 0.72 | 0.61 |   |
| MF | 0004 thiol-dependent ubiquitin-specific protease activity | 1/292 | 226 | 371  | 896  | 1 |
|    | 843                                                       |       | 69  | 064  | 305  |   |
|    | GO:                                                       |       | 100 | 0.72 | 0.62 |   |
| MF | 0101 ubiquitinyl hydrolase activity                       | 1/292 | /22 | 728  | 025  | 1 |
|    | 005                                                       |       | 669 | 514  | 809  |   |
|    | GO:                                                       |       | 102 | 0.73 | 0.62 |   |
| MF | 0015 chloride transmembrane transporter activity          | 1/292 | /22 | 429  | 270  | 1 |
|    | 108                                                       |       | 669 | 647  | 953  |   |
|    | GO:                                                       |       | 102 | 0.73 | 0.62 |   |
| MF | 0051 chaperone binding                                    | 1/292 | /22 | 429  | 270  | 1 |
|    | 087                                                       |       | 669 | 647  | 953  |   |
|    | GO:                                                       |       | 208 | 0.75 | 0.63 |   |
| MF | 0003 antigen binding                                      | 2/292 | /22 | 096  | 334  | 2 |
|    | 823                                                       |       | 669 | 468  | 795  |   |
|    | GO:                                                       |       | 107 | 0.75 | 0.63 |   |
| MF | 0008 omega peptidase activity                             | 1/292 | /22 | 104  | 334  | 1 |
|    | 242                                                       |       | 669 | 88   | 795  |   |
|    | GO:                                                       |       | 110 | 0.76 | 0.63 |   |
| MF | 0099 ion channel regulator activity                       | 1/292 | /22 | 059  | 949  | 1 |
|    | 106                                                       |       | 669 | 053  | 868  |   |
|    | GO: oxidoreductase activity, acting on paired             |       | 213 | 0.76 | 0.63 |   |
| MF | 0016 donors, with incorporation or reduction of           | 2/292 | /22 | 259  | 949  | 2 |
|    | 705 molecular oxygen                                      |       | 669 | 099  | 868  |   |
|    | GO:                                                       |       | 112 | 0.76 | 0.64 |   |
| MF | 0015 proton transmembrane transporter activity            | 1/292 | /22 | 674  | 119  | 1 |
|    | 078                                                       |       | 669 | 83   | 887  |   |
|    | GO:                                                       |       | 222 | 0.78 | 0.65 |   |
| MF | 0030 protein-macromolecule adaptor activity               | 2/292 | /22 | 233  | 242  | 2 |
|    | 674                                                       |       | 669 | 743  | 311  |   |

|    |                                                         |       |     |      |      |   |
|----|---------------------------------------------------------|-------|-----|------|------|---|
|    | GO:                                                     |       | 121 | 0.79 | 0.65 |   |
| MF | 0004 endonuclease activity                              | 1/292 | /22 | 256  | 912  | 1 |
|    | 519                                                     |       | 669 | 217  | 411  |   |
|    | GO:                                                     |       | 232 | 0.80 | 0.66 |   |
| MF | 0003 transcription coactivator activity                 | 2/292 | /22 | 257  | 421  | 2 |
|    | 713                                                     |       | 669 | 834  | 914  |   |
|    | GO:                                                     |       | 125 | 0.80 | 0.66 |   |
| MF | 0005 Ras guanyl-nucleotide exchange factor activity     | 1/292 | /22 | 310  | 421  | 1 |
|    | 088                                                     |       | 669 | 133  | 914  |   |
|    | GO:                                                     |       | 129 | 0.81 | 0.66 |   |
| MF | 0004 serine-type endopeptidase inhibitor activity       | 1/292 | /22 | 310  | 881  | 1 |
|    | 867                                                     |       | 669 | 677  | 949  |   |
|    | GO:                                                     |       | 129 | 0.81 | 0.66 |   |
| MF | 0017 SH3 domain binding                                 | 1/292 | /22 | 310  | 881  | 1 |
|    | 124                                                     |       | 669 | 677  | 949  |   |
|    | GO:                                                     |       | 441 | 0.82 | 0.67 |   |
| MF | 0003 transcription coregulator activity                 | 4/292 | /22 | 246  | 467  | 4 |
|    | 712                                                     |       | 669 | 731  | 561  |   |
|    | GO:                                                     |       | 136 | 0.82 | 0.67 |   |
| MF | 0015 inorganic anion transmembrane transporter activity | 1/292 | /22 | 941  | 843  | 1 |
|    | 103                                                     |       | 669 | 23   | 021  |   |
|    | GO:                                                     |       | 137 | 0.83 | 0.67 |   |
| MF | 0019 vitamin binding                                    | 1/292 | /22 | 162  | 843  | 1 |
|    | 842                                                     |       | 669 | 291  | 021  |   |
|    | GO:                                                     |       | 138 | 0.83 | 0.67 |   |
| MF | 0005 lipid transporter activity                         | 1/292 | /22 | 380  | 843  | 1 |
|    | 319                                                     |       | 669 | 497  | 021  |   |
|    | GO:                                                     |       | 265 | 0.85 | 0.69 |   |
| MF | 0042 histone binding                                    | 2/292 | /22 | 801  | 624  | 2 |
|    | 393                                                     |       | 669 | 31   | 556  |   |
|    | GO:                                                     |       | 153 | 0.86 | 0.69 |   |
| MF | 0016 isomerase activity                                 | 1/292 | /22 | 334  | 869  | 1 |
|    | 853                                                     |       | 669 | 886  | 206  |   |
|    | GO:                                                     |       | 379 | 0.86 | 0.69 |   |
| MF | 0019 guanyl nucleotide binding                          | 3/292 | /22 | 890  | 942  | 3 |
|    | 001                                                     |       | 669 | 01   | 423  |   |
|    | GO:                                                     |       | 379 | 0.86 | 0.69 |   |
| MF | 0032 guanyl ribonucleotide binding                      | 3/292 | /22 | 890  | 942  | 3 |
|    | 561                                                     |       | 669 | 01   | 423  |   |
|    | GO:                                                     |       | 163 | 0.88 | 0.70 |   |
| MF | 0017 Rab GTPase binding                                 | 1/292 | /22 | 007  | 652  | 1 |
|    | 137                                                     |       | 669 | 444  | 994  |   |



|                                                     |       |     |      |      |   |
|-----------------------------------------------------|-------|-----|------|------|---|
| GO:                                                 |       | 392 | 0.88 | 0.70 |   |
| MF 0004 enzyme inhibitor activity                   | 3/292 | /22 | 320  | 685  | 3 |
| 857                                                 |       | 669 | 571  | 211  |   |
| GO:                                                 |       | 168 | 0.88 | 0.70 |   |
| MF 0017 Rho GTPase binding                          | 1/292 | /22 | 765  | 685  | 1 |
| 048                                                 |       | 669 | 559  | 211  |   |
| GO:                                                 |       | 176 | 0.89 | 0.70 |   |
| MF 0003 transcription corepressor activity          | 1/292 | /22 | 880  | 685  | 1 |
| 714                                                 |       | 669 | 435  | 211  |   |
| GO:                                                 |       | 299 | 0.89 | 0.70 |   |
| MF 0061 ubiquitin protein ligase activity           | 2/292 | /22 | 994  | 685  | 2 |
| 630                                                 |       | 669 | 71   | 211  |   |
| GO:                                                 |       | 418 | 0.90 | 0.70 |   |
| MF 0004 ubiquitin-protein transferase activity      | 3/292 | /22 | 771  | 685  | 3 |
| 842                                                 |       | 669 | 938  | 211  |   |
| GO:                                                 |       | 307 | 0.90 | 0.70 |   |
| MF 0061 ubiquitin-like protein ligase activity      | 2/292 | /22 | 798  | 685  | 2 |
| 659                                                 |       | 669 | 14   | 211  |   |
| GO:                                                 |       | 184 | 0.90 | 0.70 |   |
| MF 0140 catalytic activity, acting on DNA           | 1/292 | /22 | 885  | 685  | 1 |
| 097                                                 |       | 669 | 015  | 211  |   |
| GO:                                                 |       | 421 | 0.91 | 0.70 |   |
| MF 0005 ion channel activity                        | 3/292 | /22 | 022  | 685  | 3 |
| 216                                                 |       | 669 | 689  | 211  |   |
| GO:                                                 |       | 424 | 0.91 | 0.70 |   |
| MF 0031 small GTPase binding                        | 3/292 | /22 | 267  | 685  | 3 |
| 267                                                 |       | 669 | 263  | 211  |   |
| GO:                                                 |       | 316 | 0.91 | 0.70 |   |
| MF 0060 molecular adaptor activity                  | 2/292 | /22 | 629  | 685  | 2 |
| 090                                                 |       | 669 | 862  | 211  |   |
| GO:                                                 |       | 192 | 0.91 | 0.70 |   |
| MF 0005 calmodulin binding                          | 1/292 | /22 | 790  | 685  | 1 |
| 516                                                 |       | 669 | 177  | 211  |   |
| GO:                                                 |       | 434 | 0.92 | 0.70 |   |
| MF 0003 actin binding                               | 3/292 | /22 | 039  | 685  | 3 |
| 779                                                 |       | 669 | 52   | 211  |   |
| GO:                                                 |       | 435 | 0.92 | 0.70 |   |
| MF 0019 ubiquitin-like protein transferase activity | 3/292 | /22 | 113  | 685  | 3 |
| 787                                                 |       | 669 | 225  | 211  |   |
| GO:                                                 |       | 323 | 0.92 | 0.70 |   |
| MF 0022 gated channel activity                      | 2/292 | /22 | 227  | 685  | 2 |
| 836                                                 |       | 669 | 513  | 211  |   |

|    |                                                          |       |     |      |      |   |
|----|----------------------------------------------------------|-------|-----|------|------|---|
|    | GO:                                                      |       | 197 | 0.92 | 0.70 |   |
| MF | 0000 magnesium ion binding                               | 1/292 | /22 | 309  | 685  | 1 |
|    | 287                                                      |       | 669 | 817  | 211  |   |
|    | GO:                                                      |       | 199 | 0.92 | 0.70 |   |
| MF | 0016 transferase activity, transferring hexosyl groups   | 1/292 | /22 | 508  | 685  | 1 |
|    | 758                                                      |       | 669 | 374  | 211  |   |
|    | GO:                                                      |       | 327 | 0.92 | 0.70 |   |
| MF | 0005 cation channel activity                             | 2/292 | /22 | 550  | 685  | 2 |
|    | 261                                                      |       | 669 | 794  | 211  |   |
|    | GO:                                                      |       | 201 | 0.92 | 0.70 |   |
| MF | 0005 guanyl-nucleotide exchange factor activity          | 1/292 | /22 | 701  | 685  | 1 |
|    | 085                                                      |       | 669 | 822  | 211  |   |
|    | GO:                                                      |       | 332 | 0.92 | 0.70 |   |
| MF | 0140 catalytic activity, acting on RNA                   | 2/292 | /22 | 937  | 685  | 2 |
|    | 098                                                      |       | 669 | 119  | 211  |   |
|    | GO:                                                      |       | 210 | 0.93 | 0.70 |   |
| MF | 0051 actin filament binding                              | 1/292 | /22 | 512  | 685  | 1 |
|    | 015                                                      |       | 669 | 544  | 211  |   |
|    | GO:                                                      |       | 461 | 0.93 | 0.70 |   |
| MF | 0015 channel activity                                    | 3/292 | /22 | 823  | 685  | 3 |
|    | 267                                                      |       | 669 | 863  | 211  |   |
|    | GO:                                                      |       | 461 | 0.93 | 0.70 |   |
| MF | 0022 passive transmembrane transporter activity          | 3/292 | /22 | 823  | 685  | 3 |
|    | 803                                                      |       | 669 | 863  | 211  |   |
|    | GO:                                                      |       | 218 | 0.94 | 0.70 |   |
| MF | 0022 active ion transmembrane transporter activity       | 1/292 | /22 | 157  | 685  | 1 |
|    | 853                                                      |       | 669 | 491  | 211  |   |
|    | GO:                                                      |       | 355 | 0.94 | 0.70 |   |
| MF | 0005 GTP binding                                         | 2/292 | /22 | 483  | 685  | 2 |
|    | 525                                                      |       | 669 | 075  | 211  |   |
|    | GO:                                                      |       | 357 | 0.94 | 0.70 |   |
| MF | 0042 phosphoric ester hydrolase activity                 | 2/292 | /22 | 601  | 685  | 2 |
|    | 578                                                      |       | 669 | 149  | 211  |   |
|    | GO:                                                      |       | 362 | 0.94 | 0.70 |   |
| MF | 0032 purine ribonucleoside binding                       | 2/292 | /22 | 885  | 685  | 2 |
|    | 550                                                      |       | 669 | 922  | 211  |   |
|    | GO:                                                      |       | 365 | 0.95 | 0.70 |   |
| MF | 0032 ribonucleoside binding                              | 2/292 | /22 | 049  | 685  | 2 |
|    | 549                                                      |       | 669 | 868  | 211  |   |
|    | GO:                                                      |       | 231 | 0.95 | 0.70 |   |
| MF | 0015 secondary active transmembrane transporter activity | 1/292 | /22 | 072  | 685  | 1 |
|    | 291                                                      |       | 669 | 036  | 211  |   |

|    |                                                                     |       |     |      |      |   |
|----|---------------------------------------------------------------------|-------|-----|------|------|---|
|    | GO:                                                                 |       | 366 | 0.95 | 0.70 |   |
| MF | 0001 purine nucleoside binding                                      | 2/292 | /22 | 103  | 685  | 2 |
|    | 883                                                                 |       | 669 | 397  | 211  |   |
|    | GO:                                                                 |       | 233 | 0.95 | 0.70 |   |
| MF | 0008 protein C-terminus binding                                     | 1/292 | /22 | 199  | 685  | 1 |
|    | 022                                                                 |       | 669 | 465  | 211  |   |
|    | GO:                                                                 |       | 238 | 0.95 | 0.70 |   |
| MF | 0005 GTPase activator activity                                      | 1/292 | /22 | 503  | 685  | 1 |
|    | 096                                                                 |       | 669 | 856  | 211  |   |
|    | GO:                                                                 |       | 375 | 0.95 | 0.70 |   |
| MF | 0001 nucleoside binding                                             | 2/292 | /22 | 560  | 685  | 2 |
|    | 882                                                                 |       | 669 | 968  | 211  |   |
|    | GO:                                                                 |       | 258 | 0.96 | 0.71 |   |
| MF | 0030 GTPase regulator activity                                      | 1/292 | /22 | 540  | 084  | 1 |
|    | 695                                                                 |       | 669 | 773  | 035  |   |
|    | GO:                                                                 |       | 260 | 0.96 | 0.71 |   |
| MF | 0008 microtubule binding                                            | 1/292 | /22 | 630  | 084  | 1 |
|    | 017                                                                 |       | 669 | 331  | 035  |   |
|    | GO:                                                                 |       | 409 | 0.96 | 0.71 |   |
| MF | 0017 Ras GTPase binding                                             | 2/292 | /22 | 947  | 084  | 2 |
|    | 016                                                                 |       | 669 | 605  | 035  |   |
|    | GO:                                                                 |       | 270 | 0.97 | 0.71 |   |
| MF | 0016 transferase activity, transferring glycosyl groups             | 1/292 | /22 | 044  | 084  | 1 |
|    | 757                                                                 |       | 669 | 621  | 035  |   |
|    | GO:                                                                 |       | 296 | 0.97 | 0.71 |   |
| MF | 0003 GTPase activity                                                | 1/292 | /22 | 899  | 402  | 1 |
|    | 924                                                                 |       | 669 | 317  | 536  |   |
|    | GO:                                                                 |       | 298 | 0.97 | 0.71 |   |
| MF | 0060 nucleoside-triphosphatase regulator activity                   | 1/292 | /22 | 953  | 402  | 1 |
|    | 589                                                                 |       | 669 | 794  | 536  |   |
|    | GO:                                                                 |       | 336 | 0.98 | 0.71 |   |
| MF | 0008 anion transmembrane transporter activity                       | 1/292 | /22 | 758  | 419  | 1 |
|    | 509                                                                 |       | 669 | 517  | 849  |   |
|    | GO:                                                                 |       | 341 | 0.98 | 0.71 |   |
| MF | 0022 active transmembrane transporter activity                      | 1/292 | /22 | 837  | 419  | 1 |
|    | 804                                                                 |       | 669 | 59   | 849  |   |
|    | GO:                                                                 |       | 345 | 0.98 | 0.71 |   |
| MF | 0003 mRNA binding                                                   | 1/292 | /22 | 897  | 419  | 1 |
|    | 729                                                                 |       | 669 | 218  | 849  |   |
|    | GO:                                                                 |       | 361 | 0.99 | 0.71 |   |
| MF | 0015 monovalent inorganic cation transmembrane transporter activity | 1/292 | /22 | 106  | 419  | 1 |
|    | 077                                                                 |       | 669 | 758  | 849  |   |

|                                                      |       |     |      |       |
|------------------------------------------------------|-------|-----|------|-------|
| GO:                                                  |       | 366 | 0.99 | 0.71  |
| MF 0015 tubulin binding                              | 1/292 | /22 | 163  | 419 1 |
| 631                                                  |       | 669 | 713  | 849   |
| GO:                                                  |       | 426 | 0.99 | 0.71  |
| MF 0046 metal ion transmembrane transporter activity | 1/292 | /22 | 621  | 578 1 |
| 873                                                  |       | 669 | 133  | 053   |

**Table S9 Significant Enrichment Results of KEGG of FRGs**

| ID       | Description                         | GeneRatio | BgRatio  | pvalue     | qvalue     | Count |
|----------|-------------------------------------|-----------|----------|------------|------------|-------|
| mmu04216 | Ferroptosis                         | 9/48      | 40/8939  | 4.06E-13   | 4.70E-11   | 9     |
| mmu04140 | Autophagy - animal                  | 7/48      | 142/8939 | 9.41E-06   | 0.0005445  | 7     |
| mmu04657 | IL-17 signaling pathway             | 5/48      | 91/8939  | 0.00011867 | 0.00449769 | 5     |
| mmu01210 | 2-Oxocarboxylic acid metabolism     | 3/48      | 20/8939  | 0.00015537 | 0.00449769 | 3     |
| mmu04668 | TNF signaling pathway               | 5/48      | 113/8939 | 0.00032794 | 0.00659257 | 5     |
| mmu04066 | HIF-1 signaling pathway             | 5/48      | 114/8939 | 0.00034161 | 0.00659257 | 5     |
| mmu05230 | Central carbon metabolism in cancer | 4/48      | 69/8939  | 0.00048984 | 0.00680123 | 4     |
| mmu01523 | Antifolate resistance               | 3/48      | 30/8939  | 0.00053288 | 0.00680123 | 3     |
| mmu00480 | Glutathione metabolism              | 4/48      | 72/8939  | 0.0005761  | 0.00680123 | 4     |
| mmu00020 | Citrate cycle (TCA cycle)           | 3/48      | 32/8939  | 0.00064612 | 0.00680123 | 3     |
| mmu04136 | Autophagy - other                   | 3/48      | 32/8939  | 0.00064612 | 0.00680123 | 3     |

|          |                                           |      |          |            |            |   |
|----------|-------------------------------------------|------|----------|------------|------------|---|
|          | Kaposi sarcoma-                           |      |          |            |            |   |
| mmu05167 | associated herpesvirus<br>infection       | 6/48 | 224/8939 | 0.00117885 | 0.01137491 | 6 |
| mmu04064 | NF-kappa B signaling<br>pathway           | 4/48 | 105/8939 | 0.00235195 | 0.02040769 | 4 |
| mmu05146 | Amoebiasis                                | 4/48 | 107/8939 | 0.00251931 | 0.02040769 | 4 |
| mmu04931 | Insulin resistance                        | 4/48 | 110/8939 | 0.00278546 | 0.02040769 | 4 |
| mmu00270 | Cysteine and<br>methionine metabolism     | 3/48 | 53/8939  | 0.00281997 | 0.02040769 | 3 |
| mmu05134 | Legionellosis                             | 3/48 | 61/8939  | 0.00420438 | 0.02863667 | 3 |
| mmu05206 | MicroRNAs in cancer                       | 6/48 | 303/8939 | 0.00534251 | 0.03350613 | 6 |
| mmu04137 | Mitophagy - animal                        | 3/48 | 68/8939  | 0.00570315 | 0.03350613 | 3 |
| mmu05417 | Lipid and<br>atherosclerosis              | 5/48 | 216/8939 | 0.00578742 | 0.03350613 | 5 |
| mmu04920 | Adipocytokine signaling<br>pathway        | 3/48 | 71/8939  | 0.0064316  | 0.03546246 | 3 |
| mmu05162 | Measles                                   | 4/48 | 146/8939 | 0.00761413 | 0.04007435 | 4 |
| mmu05418 | Fluid shear stress and<br>atherosclerosis | 4/48 | 148/8939 | 0.00798205 | 0.04018422 | 4 |
| mmu01230 | Biosynthesis of amino<br>acids            | 3/48 | 79/8939  | 0.00863661 | 0.04166785 | 3 |

|          |                                       |      |          |            |            |   |
|----------|---------------------------------------|------|----------|------------|------------|---|
| mmu04146 | Peroxisome                            | 3/48 | 86/8939  | 0.01088889 | 0.05043277 | 3 |
| mmu03320 | PPAR signaling pathway                | 3/48 | 89/8939  | 0.01194874 | 0.05216797 | 3 |
|          | Pathways of                           |      |          |            |            |   |
| mmu05022 | neurodegeneration - multiple diseases | 7/48 | 471/8939 | 0.01216462 | 0.05216797 | 7 |
|          | Glyoxylate and                        |      |          |            |            |   |
| mmu00630 | dicarboxylate metabolism              | 2/48 | 32/8939  | 0.01263966 | 0.05226926 | 2 |
| mmu04217 | Necroptosis                           | 4/48 | 176/8939 | 0.01440882 | 0.05753067 | 4 |
| mmu04659 | Th17 cell differentiation             | 3/48 | 105/8939 | 0.01858379 | 0.07172691 | 3 |
|          | C-type lectin receptor                |      |          |            |            |   |
| mmu04625 | signaling pathway                     | 3/48 | 112/8939 | 0.02201517 | 0.08222984 | 3 |
|          | NOD-like receptor                     |      |          |            |            |   |
| mmu04621 | signaling pathway                     | 4/48 | 211/8939 | 0.02613582 | 0.09439954 | 4 |
| mmu01200 | Carbon metabolism                     | 3/48 | 121/8939 | 0.02690387 | 0.09439954 | 3 |
| mmu04726 | Serotonergic synapse                  | 3/48 | 131/8939 | 0.03296401 | 0.11197638 | 3 |
| mmu04978 | Mineral absorption                    | 2/48 | 54/8939  | 0.03384741 | 0.11197638 | 2 |
|          | Epstein-Barr virus                    |      |          |            |            |   |
| mmu05169 | infection                             | 4/48 | 231/8939 | 0.03483813 | 0.11205246 | 4 |
| mmu04370 | VEGF signaling pathway                | 2/48 | 58/8939  | 0.03857466 | 0.11780677 | 2 |
| mmu04936 | Alcoholic liver disease               | 3/48 | 141/8939 | 0.03967946 | 0.11780677 | 3 |

|          |                                             |      |          |            |            |   |
|----------|---------------------------------------------|------|----------|------------|------------|---|
| mmu05017 | Spinocerebellar ataxia                      | 3/48 | 141/8939 | 0.03967946 | 0.11780677 | 3 |
| mmu01212 | Fatty acid metabolism                       | 2/48 | 62/8939  | 0.04353846 | 0.12067683 | 2 |
| mmu05321 | Inflammatory bowel disease                  | 2/48 | 62/8939  | 0.04353846 | 0.12067683 | 2 |
| mmu05166 | Human T-cell leukemia virus 1 infection     | 4/48 | 250/8939 | 0.04450506 | 0.12067683 | 4 |
| mmu04623 | Cytosolic DNA-sensing pathway               | 2/48 | 63/8939  | 0.04481499 | 0.12067683 | 2 |
| mmu04150 | mTOR signaling pathway                      | 3/48 | 156/8939 | 0.05095623 | 0.13226261 | 3 |
| mmu05211 | Renal cell carcinoma                        | 2/48 | 68/8939  | 0.05140206 | 0.13226261 | 2 |
| mmu05010 | Alzheimer disease                           | 5/48 | 383/8939 | 0.05335479 | 0.13335257 | 5 |
| mmu05140 | Leishmaniasis                               | 2/48 | 70/8939  | 0.05412902 | 0.13335257 | 2 |
| mmu04918 | Thyroid hormone synthesis                   | 2/48 | 74/8939  | 0.05973335 | 0.1440936  | 2 |
| mmu05133 | Pertussis                                   | 2/48 | 77/8939  | 0.06406295 | 0.14941598 | 2 |
| mmu04141 | Protein processing in endoplasmic reticulum | 3/48 | 172/8939 | 0.06452054 | 0.14941598 | 3 |
| mmu00430 | Taurine and hypotaurine metabolism          | 1/48 | 13/8939  | 0.06764507 | 0.15358014 | 1 |

|          |                                                               |      |          |            |            |   |
|----------|---------------------------------------------------------------|------|----------|------------|------------|---|
| mmu04218 | Cellular senescence                                           | 3/48 | 184/8939 | 0.07568383 | 0.16852674 | 3 |
| mmu00590 | Arachidonic acid metabolism                                   | 2/48 | 86/8939  | 0.07765543 | 0.16965436 | 2 |
| mmu05323 | Rheumatoid arthritis                                          | 2/48 | 87/8939  | 0.07921824 | 0.16986367 | 2 |
| mmu05235 | PD-L1 expression and PD-1 checkpoint pathway in cancer        | 2/48 | 88/8939  | 0.08079101 | 0.17008634 | 2 |
| mmu04211 | Longevity regulating pathway                                  | 2/48 | 90/8939  | 0.08396584 | 0.17361357 | 2 |
| mmu05222 | Small cell lung cancer                                        | 2/48 | 93/8939  | 0.08879913 | 0.17841483 | 2 |
| mmu04640 | Hematopoietic cell lineage                                    | 2/48 | 94/8939  | 0.0904286  | 0.17841483 | 2 |
| mmu04061 | Viral protein interaction with cytokine and cytokine receptor | 2/48 | 95/8939  | 0.09206703 | 0.17841483 | 2 |
| mmu00120 | Primary bile acid biosynthesis                                | 1/48 | 18/8939  | 0.09245132 | 0.17841483 | 1 |
| mmu00061 | Fatty acid biosynthesis                                       | 1/48 | 19/8939  | 0.09733444 | 0.18434349 | 1 |
| mmu05215 | Prostate cancer                                               | 2/48 | 99/8939  | 0.09870756 | 0.18434349 | 2 |
| mmu04620 | Toll-like receptor signaling pathway                          | 2/48 | 100/8939 | 0.10038872 | 0.18450725 | 2 |



## AGE-RAGE signaling

|                                            |      |          |            |            |   |
|--------------------------------------------|------|----------|------------|------------|---|
| mmu04933 pathway in diabetic complications | 2/48 | 101/8939 | 0.10207802 | 0.18468063 | 2 |
| mmu05142 Chagas disease                    | 2/48 | 103/8939 | 0.10548053 | 0.18790055 | 2 |

**Table S10 Significant Enrichment Results of KEGG of IRGs**

| ID       | Description                                                   | GeneRatio | BgRatio  | pvalue   | p.adjust | qvalue   | Count |
|----------|---------------------------------------------------------------|-----------|----------|----------|----------|----------|-------|
| mmu04060 | Cytokine-cytokine receptor interaction                        | 89/259    | 292/8939 | 6.35E-70 | 1.42E-67 | 8.09E-68 | 89    |
| mmu04061 | Viral protein interaction with cytokine and cytokine receptor | 39/259    | 95/8939  | 1.01E-35 | 1.13E-33 | 6.41E-34 | 39    |
| mmu05323 | Rheumatoid arthritis                                          | 25/259    | 87/8939  | 9.79E-19 | 7.31E-17 | 4.15E-17 | 25    |
| mmu04062 | Chemokine signaling pathway                                   | 33/259    | 192/8939 | 5.69E-17 | 2.94E-15 | 1.67E-15 | 33    |
| mmu04630 | JAK-STAT signaling pathway                                    | 31/259    | 168/8939 | 6.57E-17 | 2.94E-15 | 1.67E-15 | 31    |
| mmu04668 | TNF signaling pathway                                         | 25/259    | 113/8939 | 9.01E-16 | 3.36E-14 | 1.91E-14 | 25    |
| mmu04657 | IL-17 signaling pathway                                       | 22/259    | 91/8939  | 7.09E-15 | 2.27E-13 | 1.29E-13 | 22    |
| mmu05321 | Inflammatory bowel disease                                    | 18/259    | 62/8939  | 6.80E-14 | 1.90E-12 | 1.08E-12 | 18    |
| mmu04659 | Th17 cell differentiation                                     | 22/259    | 105/8939 | 1.71E-13 | 4.26E-12 | 2.42E-12 | 22    |
| mmu04010 | MAPK signaling pathway                                        | 35/259    | 294/8939 | 6.30E-13 | 1.41E-11 | 8.02E-12 | 35    |
| mmu04064 | NF-kappa B signaling pathway                                  | 21/259    | 105/8939 | 1.63E-12 | 3.32E-11 | 1.89E-11 | 21    |
| mmu04080 | Neuroactive ligand-receptor interaction                       | 39/259    | 376/8939 | 2.26E-12 | 4.22E-11 | 2.40E-11 | 39    |
| mmu04620 | Toll-like receptor signaling pathway                          | 20/259    | 100/8939 | 5.65E-12 | 9.73E-11 | 5.53E-11 | 20    |

|          |                                                      |        |              |          |          |          |    |
|----------|------------------------------------------------------|--------|--------------|----------|----------|----------|----|
| mmu04380 | Osteoclast differentiation                           | 22/259 | 128/893<br>9 | 1.16E-11 | 1.85E-10 | 1.05E-10 | 22 |
| mmu05417 | Lipid and atherosclerosis                            | 28/259 | 216/893<br>9 | 1.99E-11 | 2.97E-10 | 1.69E-10 | 28 |
| mmu05144 | Malaria                                              | 15/259 | 57/8939      | 4.22E-11 | 5.91E-10 | 3.36E-10 | 15 |
| mmu04672 | Intestinal immune network for IgA production         | 12/259 | 43/8939      | 1.87E-09 | 2.47E-08 | 1.40E-08 | 12 |
| mmu04660 | T cell receptor signaling pathway                    | 17/259 | 103/893<br>9 | 5.23E-09 | 6.50E-08 | 3.70E-08 | 17 |
| mmu04151 | PI3K-Akt signaling pathway                           | 32/259 | 359/893<br>9 | 1.16E-08 | 1.36E-07 | 7.76E-08 | 32 |
| mmu05134 | Legionellosis                                        | 13/259 | 61/8939      | 1.43E-08 | 1.60E-07 | 9.09E-08 | 13 |
| mmu05164 | Influenza A                                          | 21/259 | 173/893<br>9 | 2.41E-08 | 2.57E-07 | 1.46E-07 | 21 |
| mmu05167 | Kaposi sarcoma-associated herpesvirus infection      | 24/259 | 224/893<br>9 | 2.77E-08 | 2.82E-07 | 1.61E-07 | 24 |
| mmu04625 | C-type lectin receptor signaling pathway             | 16/259 | 112/893<br>9 | 1.23E-07 | 1.19E-06 | 6.79E-07 | 16 |
| mmu04933 | AGE-RAGE signaling pathway in diabetic complications | 15/259 | 101/893<br>9 | 1.82E-07 | 1.70E-06 | 9.65E-07 | 15 |
| mmu04658 | Th1 and Th2 cell differentiation                     | 14/259 | 88/8939      | 1.96E-07 | 1.70E-06 | 9.67E-07 | 14 |
| mmu05162 | Measles                                              | 18/259 | 146/893<br>9 | 1.97E-07 | 1.70E-06 | 9.67E-07 | 18 |
| mmu05146 | Amoebiasis                                           | 15/259 | 107/893<br>9 | 3.95E-07 | 3.27E-06 | 1.86E-06 | 15 |
| mmu05145 | Toxoplasmosis                                        | 15/259 | 110/893<br>9 | 5.69E-07 | 4.55E-06 | 2.59E-06 | 15 |
| mmu05142 | Chagas disease                                       | 14/259 | 103/893<br>9 | 1.42E-06 | 1.10E-05 | 6.24E-06 | 14 |
| mmu04640 | Hematopoietic cell lineage                           | 13/259 | 94/8939      | 2.79E-06 | 2.08E-05 | 1.18E-05 | 13 |
| mmu05161 | Hepatitis B                                          | 17/259 | 163/893<br>9 | 4.59E-06 | 3.16E-05 | 1.79E-05 | 17 |
| mmu04622 | RIG-I-like receptor signaling pathway                | 11/259 | 70/8939      | 4.65E-06 | 3.16E-05 | 1.79E-05 | 11 |
| mmu05140 | Leishmaniasis                                        | 11/259 | 70/8939      | 4.65E-06 | 3.16E-05 | 1.79E-05 | 11 |
| mmu05418 | Fluid shear stress and atherosclerosis               | 16/259 | 148/893<br>9 | 5.53E-06 | 3.55E-05 | 2.02E-05 | 16 |

|          |                                                        |        |              |          |                |                |    |
|----------|--------------------------------------------------------|--------|--------------|----------|----------------|----------------|----|
| mmu04024 | cAMP signaling pathway                                 | 20/259 | 220/893<br>9 | 5.55E-06 | 3.55E-05       | 2.02E-05       | 20 |
| mmu05135 | Yersinia infection                                     | 15/259 | 134/893<br>9 | 7.10E-06 | 4.42E-05       | 2.51E-05       | 15 |
| mmu04623 | Cytosolic DNA-sensing pathway                          | 10/259 | 63/8939      | 1.16E-05 | 7.01E-05       | 3.98E-05       | 10 |
| mmu04014 | Ras signaling pathway                                  | 20/259 | 232/893<br>9 | 1.23E-05 | 7.23E-05       | 4.11E-05       | 20 |
| mmu05143 | African trypanosomiasis                                | 8/259  | 39/8939      | 1.26E-05 | 7.23E-05       | 4.11E-05       | 8  |
| mmu04015 | Rap1 signaling pathway                                 | 19/259 | 214/893<br>9 | 1.35E-05 | 7.54E-05       | 4.29E-05       | 19 |
| mmu05163 | Human cytomegalovirus infection                        | 21/259 | 256/893<br>9 | 1.60E-05 | 8.71E-05       | 4.96E-05       | 21 |
| mmu05205 | Proteoglycans in cancer                                | 18/259 | 205/893<br>9 | 2.65E-05 | 0.000141<br>34 | 8.04E-05       | 18 |
| mmu05171 | Coronavirus disease - COVID-19                         | 20/259 | 247/893<br>9 | 3.08E-05 | 0.000160<br>48 | 9.12E-05       | 20 |
| mmu04920 | Adipocytokine signaling pathway                        | 10/259 | 71/8939      | 3.41E-05 | 0.000173<br>61 | 9.87E-05       | 10 |
| mmu05235 | PD-L1 expression and PD-1 checkpoint pathway in cancer | 11/259 | 88/8939      | 4.34E-05 | 0.000215<br>93 | 0.00012<br>278 | 11 |
| mmu04650 | Natural killer cell mediated cytotoxicity              | 13/259 | 121/893<br>9 | 4.53E-05 | 0.000220<br>57 | 0.00012<br>542 | 13 |
| mmu04917 | Prolactin signaling pathway                            | 10/259 | 74/8939      | 4.92E-05 | 0.000234<br>28 | 0.00013<br>322 | 10 |
| mmu04936 | Alcoholic liver disease                                | 14/259 | 141/893<br>9 | 5.59E-05 | 0.000260<br>93 | 0.00014<br>837 | 14 |
| mmu05310 | Asthma                                                 | 6/259  | 25/8939      | 6.22E-05 | 0.000284<br>28 | 0.00016<br>165 | 6  |
| mmu04360 | Axon guidance                                          | 16/259 | 181/893<br>9 | 6.89E-05 | 0.000308<br>68 | 0.00017<br>552 | 16 |
| mmu05166 | Human T-cell leukemia virus 1 infection                | 19/259 | 250/893<br>9 | 0.000114 | 0.000502<br>47 | 0.00028<br>75  | 19 |
| mmu05169 | Epstein-Barr virus infection                           | 18/259 | 231/893<br>9 | 0.000126 | 0.000544<br>49 | 0.00030<br>9   | 18 |
| mmu04012 | ErbB signaling pathway                                 | 10/259 | 84/8939      | 0.000146 | 0.000619<br>53 | 0.00035<br>28  | 10 |
| mmu04020 | Calcium signaling pathway                              | 18/259 | 240/893<br>9 | 0.000204 | 0.000848<br>54 | 0.00048<br>44  | 18 |
| mmu05160 | Hepatitis C                                            | 14/259 | 165/893<br>9 | 0.000300 | 0.001223<br>45 | 0.00069<br>63  | 14 |

|          |                                                 |        |         |          |          |         |   |    |    |     |    |
|----------|-------------------------------------------------|--------|---------|----------|----------|---------|---|----|----|-----|----|
| mmu04621 | NOD-like receptor signaling pathway             | 16/259 | 211/893 | 0.000407 | 0.001629 | 0.00092 | 9 | 27 | 1  | 632 | 16 |
| mmu04662 | B cell receptor signaling pathway               | 9/259  | 81/8939 | 0.000528 | 0.002075 | 0.00118 | 9 | 09 | 31 | 004 | 9  |
| mmu04932 | Non-alcoholic fatty liver disease               | 13/259 | 156/893 | 0.000584 | 0.002256 | 0.00128 | 9 | 26 | 47 | 305 | 13 |
| mmu05152 | Tuberculosis                                    | 14/259 | 180/893 | 0.000724 | 0.002751 | 0.00156 | 9 | 72 | 49 | 452 | 14 |
| mmu05224 | Breast cancer                                   | 12/259 | 147/893 | 0.001131 | 0.004224 | 0.00240 | 9 | 64 | 8  | 226 | 12 |
| mmu05220 | Chronic myeloid leukemia                        | 8/259  | 76/8939 | 0.001530 | 0.005619 | 0.00319 | 9 | 41 | 86 | 55  | 8  |
| mmu05133 | Pertussis                                       | 8/259  | 77/8939 | 0.001665 | 0.005951 | 0.00338 | 9 | 98 | 42 | 403 | 8  |
| mmu04350 | TGF-beta signaling pathway                      | 9/259  | 95/8939 | 0.001673 | 0.005951 | 0.00338 | 9 | 84 | 42 | 403 | 9  |
| mmu04210 | Apoptosis                                       | 11/259 | 136/893 | 0.001942 | 0.006773 | 0.00385 | 9 | 96 | 63 | 155 | 11 |
| mmu01521 | EGFR tyrosine kinase inhibitor resistance       | 8/259  | 79/8939 | 0.001965 | 0.006773 | 0.00385 | 9 | 56 | 63 | 155 | 8  |
| mmu04722 | Neurotrophin signaling pathway                  | 10/259 | 121/893 | 0.002634 | 0.008939 | 0.00508 | 9 | 65 | 65 | 317 | 10 |
| mmu05226 | Gastric cancer                                  | 11/259 | 150/893 | 0.004166 | 0.013931 | 0.00792 | 9 | 86 | 01 | 13  | 11 |
| mmu04612 | Antigen processing and presentation             | 8/259  | 90/8939 | 0.004448 | 0.014555 | 0.00827 | 9 | 19 | 65 | 647 | 8  |
| mmu04931 | Insulin resistance                              | 9/259  | 110/893 | 0.004546 | 0.014555 | 0.00827 | 9 | 85 | 65 | 647 | 9  |
| mmu04514 | Cell adhesion molecules                         | 12/259 | 174/893 | 0.004631 | 0.014555 | 0.00827 | 9 | 26 | 65 | 647 | 12 |
| mmu04068 | FoxO signaling pathway                          | 10/259 | 131/893 | 0.004669 | 0.014555 | 0.00827 | 9 | 08 | 65 | 647 | 10 |
| mmu05218 | Melanoma                                        | 7/259  | 72/8939 | 0.004678 | 0.014555 | 0.00827 | 9 | 6  | 65 | 647 | 7  |
| mmu05410 | Hypertrophic cardiomyopathy                     | 8/259  | 91/8939 | 0.004757 | 0.014599 | 0.00830 | 9 | 97 | 81 | 158 | 8  |
| mmu04923 | Regulation of lipolysis in adipocytes           | 6/259  | 56/8939 | 0.005388 | 0.016309 | 0.00927 | 9 | 05 | 76 | 388 | 6  |
| mmu04924 | Renin secretion                                 | 7/259  | 76/8939 | 0.006298 | 0.018811 | 0.01069 | 9 | 49 | 48 | 638 | 7  |
| mmu04213 | Longevity regulating pathway - multiple species | 6/259  | 62/8939 | 0.008837 | 0.026046 | 0.01481 | 9 | 08 | 14 | 007 | 6  |

|          |                                                          |        |         |          |          |         |    |
|----------|----------------------------------------------------------|--------|---------|----------|----------|---------|----|
| mmu05332 | Graft-versus-host disease                                | 6/259  | 63/8939 | 0.009536 | 0.027743 | 0.01577 | 6  |
|          |                                                          |        |         | 83       | 49       | 52      |    |
| mmu01523 | Antifolate resistance                                    | 4/259  | 30/8939 | 0.010430 | 0.029954 | 0.01703 | 4  |
|          |                                                          |        |         | 61       | 57       | 244     |    |
| mmu04072 | Phospholipase D signaling pathway                        | 10/259 | 149/893 | 0.011256 | 0.031916 | 0.01814 | 10 |
|          |                                                          |        | 9       | 13       | 11       | 779     |    |
| mmu04930 | Type II diabetes mellitus                                | 5/259  | 48/8939 | 0.012180 | 0.034105 | 0.01939 | 5  |
|          |                                                          |        |         | 7        | 95       | 295     |    |
| mmu04926 | Relaxin signaling pathway                                | 9/259  | 129/893 | 0.012513 | 0.034604 | 0.01967 | 9  |
|          |                                                          |        | 9       | 34       | 8        | 66      |    |
| mmu05202 | Transcriptional misregulation in cancer                  | 13/259 | 223/893 | 0.012864 | 0.035005 | 0.01990 | 13 |
|          |                                                          |        | 9       | 91       | 07       | 42      |    |
| mmu04928 | Parathyroid hormone synthesis, secretion and action      | 8/259  | 108/893 | 0.012970 | 0.035005 | 0.01990 | 8  |
|          |                                                          |        | 9       | 63       | 07       | 42      |    |
| mmu05210 | Colorectal cancer                                        | 7/259  | 88/8939 | 0.013667 | 0.036447 | 0.02072 | 7  |
|          |                                                          |        |         | 9        | 72       | 45      |    |
| mmu04510 | Focal adhesion                                           | 12/259 | 201/893 | 0.013915 | 0.036671 | 0.02085 | 12 |
|          |                                                          |        | 9       | 71       | 99       | 202     |    |
| mmu04915 | Estrogen signaling pathway                               | 9/259  | 134/893 | 0.015739 | 0.040995 | 0.02331 | 9  |
|          |                                                          |        | 9       | 27       | 3        | 03      |    |
| mmu04066 | HIF-1 signaling pathway                                  | 8/259  | 114/893 | 0.017506 | 0.045074 | 0.02562 | 8  |
|          |                                                          |        | 9       | 42       |          | 948     |    |
| mmu01522 | Endocrine resistance                                     | 7/259  | 93/8939 | 0.018074 | 0.046008 | 0.02616 | 7  |
|          |                                                          |        |         | 76       | 47       | 083     |    |
| mmu05414 | Dilated cardiomyopathy                                   | 7/259  | 94/8939 | 0.019063 | 0.047897 | 0.02723 | 7  |
|          |                                                          |        |         | 4        | 71       | 507     |    |
| mmu04935 | Growth hormone synthesis, secretion and action           | 8/259  | 116/893 | 0.019244 | 0.047897 | 0.02723 | 8  |
|          |                                                          |        | 9       | 61       | 71       | 507     |    |
| mmu05340 | Primary immunodeficiency                                 | 4/259  | 36/8939 | 0.019593 | 0.048229 | 0.02742 | 4  |
|          |                                                          |        |         | 26       | 57       | 377     |    |
| mmu04550 | Signaling pathways regulating pluripotency of stem cells | 9/259  | 140/893 | 0.020372 | 0.049601 | 0.02820 | 9  |
|          |                                                          |        | 9       | 22       | 91       | 41      |    |
| mmu04670 | Leukocyte transendothelial migration                     | 8/259  | 118/893 | 0.021102 | 0.050828 | 0.02890 | 8  |
|          |                                                          |        | 9       | 81       | 27       | 141     |    |
| mmu05212 | Pancreatic cancer                                        | 6/259  | 76/8939 | 0.022526 | 0.053681 | 0.03052 | 6  |
|          |                                                          |        |         | 92       | 17       | 36      |    |
| mmu04270 | Vascular smooth muscle contraction                       | 9/259  | 144/893 | 0.023963 | 0.056502 | 0.03212 | 9  |
|          |                                                          |        | 9       | 24       | 79       | 8       |    |
| mmu05215 | Prostate cancer                                          | 7/259  | 99/8939 | 0.024579 | 0.057351 | 0.03261 | 7  |
|          |                                                          |        |         | 06       | 13       | 037     |    |
| mmu05320 | Autoimmune thyroid disease                               | 6/259  | 79/8939 | 0.026679 | 0.061611 | 0.03503 | 6  |
|          |                                                          |        |         | 99       | 52       | 287     |    |

|          |                                               |        |              |                |                |                |    |
|----------|-----------------------------------------------|--------|--------------|----------------|----------------|----------------|----|
| mmu05225 | Hepatocellular carcinoma                      | 10/259 | 174/893<br>9 | 0.029808<br>9  | 0.068134<br>62 | 0.03874<br>196 | 10 |
| mmu05207 | Chemical carcinogenesis - receptor activation | 12/259 | 225/893<br>9 | 0.030522<br>37 | 0.069060<br>71 | 0.03926<br>854 | 12 |
| mmu05330 | Allograft rejection                           | 5/259  | 63/8939      | 0.035340<br>14 | 0.079161<br>91 | 0.04501<br>218 | 5  |
| mmu04664 | Fc epsilon RI signaling pathway               | 5/259  | 66/8939      | 0.041943<br>3  | 0.093022<br>76 | 0.05289<br>358 | 5  |
| mmu04211 | Longevity regulating pathway                  | 6/259  | 90/8939      | 0.046128<br>93 | 0.100778<br>8  | 0.05730<br>374 | 6  |
| mmu05170 | Human immunodeficiency virus 1 infection      | 12/259 | 240/893<br>9 | 0.046340<br>25 | 0.100778<br>8  | 0.05730<br>374 | 12 |
| mmu04610 | Complement and coagulation cascades           | 6/259  | 93/8939      | 0.052642<br>29 | 0.113383<br>4  | 0.06447<br>082 | 6  |
| mmu04710 | Circadian rhythm                              | 3/259  | 30/8939      | 0.054926<br>58 | 0.116233<br>3  | 0.06609<br>131 | 3  |
| mmu04810 | Regulation of actin cytoskeleton              | 11/259 | 220/893<br>9 | 0.055003<br>26 | 0.116233<br>3  | 0.06609<br>131 | 11 |
| mmu05132 | Salmonella infection                          | 12/259 | 253/893<br>9 | 0.064017<br>39 | 0.134017<br>7  | 0.07620<br>368 | 12 |
| mmu04370 | VEGF signaling pathway                        | 4/259  | 58/8939      | 0.086773<br>39 | 0.179974<br>43 | 0.10233<br>509 | 4  |
| mmu05416 | Viral myocarditis                             | 5/259  | 88/8939      | 0.111605<br>63 | 0.229354<br>7  | 0.13041<br>315 | 5  |
| mmu05211 | Renal cell carcinoma                          | 4/259  | 68/8939      | 0.134105<br>25 | 0.273087<br>06 | 0.15527<br>977 | 4  |
| mmu04217 | Necroptosis                                   | 8/259  | 176/893<br>9 | 0.138823<br>72 | 0.280148<br>76 | 0.15929<br>511 | 8  |
| mmu04940 | Type I diabetes mellitus                      | 4/259  | 70/8939      | 0.144630<br>13 | 0.289260<br>26 | 0.16447<br>6   | 4  |
| mmu04520 | Adherens junction                             | 4/259  | 71/8939      | 0.150010<br>92 | 0.295997<br>43 | 0.16830<br>681 | 4  |
| mmu04071 | Sphingolipid signaling pathway                | 6/259  | 124/893<br>9 | 0.150641<br>55 | 0.295997<br>43 | 0.16830<br>681 | 6  |
| mmu04152 | AMPK signaling pathway                        | 6/259  | 126/893<br>9 | 0.158744<br>38 | 0.309206<br>44 | 0.17581<br>757 | 6  |
| mmu04218 | Cellular senescence                           | 8/259  | 184/893<br>9 | 0.165180<br>6  | 0.318969<br>44 | 0.18136<br>89  | 8  |
| mmu04390 | Hippo signaling pathway                       | 7/259  | 157/893<br>9 | 0.170747<br>27 | 0.326900<br>75 | 0.18587<br>872 | 7  |
| mmu05100 | Bacterial invasion of epithelial cells        | 4/259  | 76/8939      | 0.178005<br>3  | 0.335213<br>8  | 0.19060<br>559 | 4  |

|          |                                      |        |         |          |          |         |     |  |  |  |    |
|----------|--------------------------------------|--------|---------|----------|----------|---------|-----|--|--|--|----|
| mmu05168 | Herpes simplex virus 1 infection     | 17/259 | 459/893 | 0.178082 | 0.335213 | 0.19060 |     |  |  |  | 17 |
|          |                                      |        | 9       |          | 33       | 8       | 559 |  |  |  |    |
| mmu04950 | Maturity onset diabetes of the young | 2/259  | 27/8939 | 0.183538 | 0.342605 | 0.19480 |     |  |  |  | 2  |
|          |                                      |        |         | 71       | 59       | 863     |     |  |  |  |    |
